# Supplementary material
Source: PubMed Central journal article supplement (PMC5600825)
Supplement: NIHMS881878-supplement-2.pdf [file NIHMS881878-supplement-2.pdf]

## Supplementary file 1: Library prep protocol

### MODIFIED TRUSEQ NANO LIBRARY PREP PROTOCOL

| Step                     | Reagent volume (uL) | Vendor; catalogue number            |
|--------------------------|---------------------|-------------------------------------|
| <b>1 End Repair</b>      |                     |                                     |
| Input cfDNA (1.5ng/uL)   | 20                  |                                     |
| End Repair Mix 2         | 12                  | Illumina; 15036418, kit FC-121-4003 |
| <b>Total Volume (uL)</b> | <b>32</b>           |                                     |

Thermocycler conditions: End repair

30°C, 30 min

70°C, 10 min

10°C, 5 min, then hold

### 2 dA-Tailing

|                          |           |                                    |
|--------------------------|-----------|------------------------------------|
| End-repaired cfDNA       | 32        |                                    |
| A-Tailing Mix            | 32        | Illumina; 1503641, kit FC-121-4003 |
| <b>Total Volume (uL)</b> | <b>64</b> |                                    |

Thermocycler conditions: dA-Tailing

37°C, 30 min

70°C, 5 min

10°C, 5 min and then hold

### 3 Ligation

|                |    |                                     |
|----------------|----|-------------------------------------|
| dA-Tailed DNA  | 64 |                                     |
| Ligation Mix 2 | 6  | Illumina; 15036183, kit FC-121-4003 |
| Adapter        | 5  | Illumina; kit FC-121-4003           |

### STANDARD TRUSEQ NANO LIBRARY PREP PROTOCOL

|                          |            |
|--------------------------|------------|
| Input DNA                | 60         |
| End Repair Mix 2         | 40         |
| <b>Total Volume (uL)</b> | <b>100</b> |

30°C, 30 min

4°C hold

2 rounds of DNA purification and size selection

|                          |           |
|--------------------------|-----------|
| End-repaired DNA         | 17.5      |
| A-Tailing Mix            | 12.5      |
| <b>Total Volume (uL)</b> | <b>30</b> |

Thermocycler conditions: dA-Tailing

37°C, 30 min

70°C, 5 min

10°C hold

|                           |     |
|---------------------------|-----|
| dA-Tailed DNA             | 30  |
| Ligation Mix 2            | 2.5 |
| Resuspension Buffer (RSB) | 2.5 |

**Total Volume (uL) 75**

**4 Stop ligation**

Thermocycler conditions: Stop ligation

20°C, 30min

Stop Ligation buffer 5 Illumina; 15012546, kit FC-121-4003

**Total Volume (uL) 80**

**5 Sample purification**

AMPure XP bead 64 Beckman Coulter; cat# A63880  
Elute in 23 uL RSB. Transfer 20 uL Illumina; kit FC-121-4003

**6 PCR amplification of ligation product**

5X KAPA HiFi Fidelity buffer 10  
10 mM dNTP Mix 1.5 Kapa BioSystems; cat# KK2621  
HiFi HotStart DNA Polymerase 1  
PPC 5 Illumina; kit FC-121-4003  
H2O 12.5  
adapter-ligated library 20  
**Total Volume (uL) 50**

Thermocycler conditions: PCR amplification of ligation product

98°C 45 sec  
98°C 15 sec  
60°C 30 sec  
72°C 30 sec  
72°C 1 min  
} 9 cycles (>10 ng cfDNA input), OR 12 cycles (<10 ng cfDNA input)

Adapter 3

**Total Volume (uL) 38**

Thermocycler conditions: Stop ligation

30°C, 10 min

Stop Ligation Buffer 5

**Total Volume (uL) 43**

2 rounds of DNA purification with AMPure XP beads

Ligated Product 25

PPC primer 5

Enhanced PCR Mix 20

**Total Volume (uL) 50**

95°C 3 min  
98°C 20 sec  
60°C 15 sec  
72°C 30 sec  
72°C 5 min  
} 9 cycles

4°C Hold

**7 Sample purification**

AMPure XP bead 50 Beckman Coulter; cat# A63880  
Elute in 25 uL RSB. Transfer 23 uL to Targeted Panel Enrichment

4°C Hold

AMPure XP bead 90  
Elute in 31.5 uL RSB. Transfer 30 uL to Targeted Panel Enrichment
