# Supplementary material
Source: PubMed Central journal article supplement (PMC5600825)
Supplement: NIHMS881878-supplement-3.pdf [file NIHMS881878-supplement-3.pdf]

Supplementary file 2. All molecular aberrations detected in plasma cell-free DNA samples from patients with advanced cancers

| Full ID | Patient ID | Gene                        | Annotation Impact  | HGVSc                                                                                                                | HGVSp                                                      | cosmic count | dbSNP | SNP_KEY                | SAMPLE SNP KEY               | VAF      |
|---------|------------|-----------------------------|--------------------|----------------------------------------------------------------------------------------------------------------------|------------------------------------------------------------|--------------|-------|------------------------|------------------------------|----------|
| 65_bl-2 | 65         | KRAS                        | MODERATE           | c.34G>C                                                                                                              | p.Gly12Arg                                                 | 3755         | FALSE | chr12:253<br>98285:C:G | 6:chr12:25<br>398285:C:<br>G | 0.088195 |
| 65_bl-2 | 65         | RET                         | MODERATE           | c.1778G>A                                                                                                            | p.Gly593Glu                                                | 1            | FALSE | chr10:436<br>09022:G:A | 6:chr10:43<br>609022:G:<br>A | 0.002729 |
| 65_bl-2 | 65         | TP53                        | HIGH               | c.439C>T;<br>c.520C>T;<br>c.799C>T;<br>c.916C>T                                                                      | p.Arg147*;<br>p.Arg174*;<br>p.Arg267*;<br>p.Arg306*        | 167          | FALSE | chr17:757<br>7022:G:A  | 6:chr17:75<br>77022:G:A      | 0.121813 |
| 65_bl-2 | 65         | BRAF                        | HIGH               | c.1906C>T                                                                                                            | p.Gln636*                                                  | 2            | FALSE | chr7:1404<br>49173:G:A | 6:chr7:140<br>449173:G:<br>A | 0.002685 |
| 11_c3-1 | 11         | ERBB2                       | MODERATE; MODIFIER | c.1179C>A<br>;<br>c.1224C>A<br>;<br>c.1269C>A<br>;<br>n.1593C>A                                                      | p.Ser393Arg<br>;<br>p.Ser408Arg<br>;<br>p.Ser423Arg<br>;   | 1            | FALSE | chr17:378<br>71745:C:A | 7:chr17:37<br>871745:C:<br>A | 0.001237 |
| 11_c3-1 | 11         | EPHA3                       | HIGH               | c.1515C>A                                                                                                            | p.Tyr505*                                                  | 0            | FALSE | chr3:8944<br>8551:C:A  | 7:chr3:894<br>48551:C:A      | 0.001867 |
| 11_c3-1 | 11         | ERBB2;<br>MIEN1;<br>MIR4728 | MODIFIER; MODERATE | c.*174C>A<br>;<br>c.3505C>A<br>;<br>c.3550C>A<br>;<br>c.3595C>A<br>;<br>n.3919C>A<br>;<br>c.*388G>T<br>;<br>n.*67C>A | p.Pro1169T<br>hr;<br>p.Pro1184T<br>hr;<br>p.Pro1199T<br>hr | 2            | FALSE | chr17:378<br>84124:C:A | 7:chr17:37<br>884124:C:<br>A | 0.001227 |

|         |    |                    |                    |                                                                                                                                                                                                        |                                                                                                                      |       |       |                        |                              |          |
|---------|----|--------------------|--------------------|--------------------------------------------------------------------------------------------------------------------------------------------------------------------------------------------------------|----------------------------------------------------------------------------------------------------------------------|-------|-------|------------------------|------------------------------|----------|
| 11_c3-1 | 11 | FGFR1;<br>LETM2    | MODERATE; MODIFIER | c.1834G>A<br>;<br>c.1840G>A<br>;<br>c.2077G>A<br>;<br>c.2101G>A<br>;<br>c.2107G>A<br>;<br>c.2200G>A<br>;<br>c.*1406C><br>T;<br>c.*1423C><br>T;<br>c.*1553C><br>T;<br>c.*1567C><br>T;<br>c.*1638C><br>T | p.Gly612Ser<br>;<br>p.Gly614Ser<br>;<br>p.Gly693Ser<br>;<br>p.Gly701Ser<br>;<br>p.Gly703Ser<br>;<br>p.Gly734Ser<br>; | 2     | FALSE | chr8:3827<br>1749:C:T  | 7:chr8:382<br>71749:C:T      | 0.001281 |
| 11_c3-1 | 11 | NF1                | MODERATE           | c.2695T>G                                                                                                                                                                                              | p.Leu899Val                                                                                                          | 3     | FALSE | chr17:295<br>56328:T:G | 7:chr17:29<br>556328:T:<br>G | 0.012256 |
| 11_c3-1 | 11 | FGFR1              | MODIFIER; MODERATE | c.-85G>T;<br>c.107G>T;<br>c.8G>T                                                                                                                                                                       | ; p.Ser36Ile;<br>p.Ser3Ile                                                                                           | 1     | FALSE | chr8:3831<br>4957:C:A  | 7:chr8:383<br>14957:C:A      | 0.001045 |
| 11_c3-1 | 11 | KIT                | MODERATE           | c.1726C>T;<br>c.1738C>T                                                                                                                                                                                | p.His576Tyr;<br>p.His580Tyr                                                                                          | 2     | FALSE | chr4:5559<br>3672:C:T  | 7:chr4:555<br>93672:C:T      | 0.001021 |
| 11_c3-1 | 11 | KRAS               | MODERATE           | c.35G>T                                                                                                                                                                                                | p.Gly12Val                                                                                                           | 11213 | FALSE | chr12:253<br>98284:C:A | 7:chr12:25<br>398284:C:<br>A | 0.003529 |
| 11_c3-1 | 11 | NF1                | MODERATE           | c.1382G>A                                                                                                                                                                                              | p.Arg461Gln                                                                                                          | 1     | FALSE | chr17:295<br>33379:G:A | 7:chr17:29<br>533379:G:<br>A | 0.00146  |
| 11_c3-1 | 11 | PIK3CA             | MODERATE           | c.478C>A                                                                                                                                                                                               | p.His160Asn                                                                                                          | 1     | FALSE | chr3:1789<br>17603:C:A | 7:chr3:178<br>917603:C:<br>A | 0.001075 |
| 11_c3-1 | 11 | PTEN               | MODERATE           | c.421C>A                                                                                                                                                                                               | p.His141Asn                                                                                                          | 2     | FALSE | chr10:896<br>92937:C:A | 7:chr10:89<br>692937:C:<br>A | 0.00163  |
| 11_c3-1 | 11 | CTNNB1             | MODERATE           | c.98C>A                                                                                                                                                                                                | p.Ser33Tyr                                                                                                           | 0     | FALSE | chr3:4126<br>6101:C:A  | 7:chr3:412<br>66101:C:A      | 0.001064 |
| 11_c3-1 | 11 | HOXD-AS2;<br>HOXD8 | MODIFIER; MODERATE | n.*692G>T<br>;<br>c.-123-<br>62C>A;<br>c.368C>A                                                                                                                                                        | ; p.Pro123His                                                                                                        | 0     | FALSE | chr2:1769<br>95462:C:A | 7:chr2:176<br>995462:C:<br>A | 0.002334 |
| 11_c3-1 | 11 | PTEN               | MODERATE           | c.443C>A                                                                                                                                                                                               | p.Ala148Glu                                                                                                          | 1     | FALSE | chr10:896<br>92959:C:A | 7:chr10:89<br>692959:C:<br>A | 0.00121  |
| 11_c3-1 | 11 | PTEN               | HIGH               | c.633C>A                                                                                                                                                                                               | p.Cys211*                                                                                                            | 2     | FALSE | chr10:897<br>12015:C:A | 7:chr10:89<br>712015:C:<br>A | 0.002981 |

|         |    |                   |                    |                                                 |                                                                         |     |       |                        |                              |          |
|---------|----|-------------------|--------------------|-------------------------------------------------|-------------------------------------------------------------------------|-----|-------|------------------------|------------------------------|----------|
| 11_c3-1 | 11 | CTNNB1            | MODERATE           | c.884C>A                                        | p.Ala295Asp                                                             | 0   | FALSE | chr3:4126<br>7300:C:A  | 7:chr3:412<br>67300:C:A      | 0.00174  |
| 11_c3-1 | 11 | TP53              | MODERATE           | c.392G>T;<br>c.473G>T;<br>c.752G>T;<br>c.869G>T | p.Arg131Leu<br>;<br>p.Arg158Leu<br>;<br>p.Arg251Leu<br>;<br>p.Arg290Leu | 20  | FALSE | chr17:757<br>7069:C:A  | 7:chr17:75<br>77069:C:A      | 0.0011   |
| 11_c3-1 | 11 | NF1               | MODERATE           | c.1319G>A                                       | p.Arg440Gln                                                             | 1   | FALSE | chr17:295<br>33316:G:A | 7:chr17:29<br>533316:G:<br>A | 0.001113 |
| 11_c3-1 | 11 | TP53              | MODERATE           | c.128G>A;<br>c.407G>A;<br>c.47G>A;<br>c.524G>A  | p.Arg43His;<br>p.Arg136His<br>;<br>p.Arg16His;<br>p.Arg175His           | 979 | FALSE | chr17:757<br>8406:C:T  | 7:chr17:75<br>78406:C:T      | 0.001319 |
| 11_c3-1 | 11 | CTNNB1            | HIGH               | c.999C>A                                        | p.Tyr333*                                                               | 0   | FALSE | chr3:4126<br>8761:C:A  | 7:chr3:412<br>68761:C:A      | 0.000966 |
| 11_c3-1 | 11 | CTNNB1            | MODERATE           | c.125C>A                                        | p.Thr42Lys                                                              | 0   | FALSE | chr3:4126<br>6128:C:A  | 7:chr3:412<br>66128:C:A      | 0.001046 |
| 11_c3-1 | 11 | ALK               | MODERATE           | c.3271G>A                                       | p.Asp1091A<br>sn                                                        | 3   | FALSE | chr2:2944<br>6296:C:T  | 7:chr2:294<br>46296:C:T      | 0.000964 |
| 11_c3-1 | 11 | EPHA3             | MODERATE           | c.2317G>A                                       | p.Asp773As<br>n                                                         | 0   | FALSE | chr3:8948<br>0480:G:A  | 7:chr3:894<br>80480:G:A      | 0.001142 |
| 11_c3-1 | 11 | HGF               | MODERATE           | c.5G>T                                          | p.Trp2Leu                                                               | 0   | FALSE | chr7:8139<br>9283:C:A  | 7:chr7:813<br>99283:C:A      | 0.001131 |
| 44_c2-1 | 44 | EGFR;<br>EGFR-AS1 | LOW; MODIFIER      | c.2472C>A<br>; n.-1G>T                          | p.Gly824Gly<br>;                                                        | 1   | FALSE | chr7:5525<br>9414:C:A  | 8:chr7:552<br>59414:C:A      | 0.001873 |
| 44_c2-1 | 44 | CTNNB1            | MODERATE           | c.157G>A                                        | p.Glu53Lys                                                              | 0   | FALSE | chr3:4126<br>6160:G:A  | 8:chr3:412<br>66160:G:A      | 0.00213  |
| 44_c2-1 | 44 | TP53              | MODIFIER; MODERATE | c.-5G>T;<br>c.356G>T;<br>c.473G>T;<br>c.77G>T   | p.Arg119Leu<br>;<br>p.Arg158Leu<br>;<br>p.Arg26Leu                      | 80  | FALSE | chr17:757<br>8457:C:A  | 8:chr17:75<br>78457:C:A      | 0.001393 |
| 44_c2-1 | 44 | KIT               | LOW                | c.1869G>A<br>;<br>c.1881G>A                     | p.Pro623Pro<br>;<br>p.Pro627Pro                                         | 1   | FALSE | chr4:5559<br>4178:G:A  | 8:chr4:555<br>94178:G:A      | 0.002324 |
| 44_c2-1 | 44 | CTNNB1            | MODERATE           | c.91C>A                                         | p.Leu31Met                                                              | 0   | FALSE | chr3:4126<br>6094:C:A  | 8:chr3:412<br>66094:C:A      | 0.001689 |
| 44_c2-1 | 44 | HGF               | MODERATE           | c.655G>T;<br>c.670G>T                           | p.Asp219Tyr<br>;<br>p.Asp224Tyr                                         | 0   | FALSE | chr7:8137<br>4392:C:A  | 8:chr7:813<br>74392:C:A      | 0.001101 |

|         |    |                   |                    |                                                   |                                                               |   |       |                        |                              |          |
|---------|----|-------------------|--------------------|---------------------------------------------------|---------------------------------------------------------------|---|-------|------------------------|------------------------------|----------|
| 44_c2-1 | 44 | TP53              | MODERATE           | c.128G>T;<br>c.209G>T;<br>c.488G>T;<br>c.605G>T   | p.Arg43Leu;<br>p.Arg70Leu;<br>p.Arg163Leu<br>;<br>p.Arg202Leu | 4 | FALSE | chr17:757<br>8244:C:A  | 8:chr17:75<br>78244:C:A      | 0.001235 |
| 44_c2-1 | 44 | NF1               | MODERATE           | c.1319G>A                                         | p.Arg440Gln                                                   | 1 | FALSE | chr17:295<br>33316:G:A | 8:chr17:29<br>533316:G:<br>A | 0.001198 |
| 44_c2-1 | 44 | PTEN              | MODERATE           | c.325G>A                                          | p.Asp109As<br>n                                               | 2 | FALSE | chr10:896<br>92841:G:A | 8:chr10:89<br>692841:G:<br>A | 0.001214 |
| 44_c2-1 | 44 | HGF               | MODERATE           | c.1057G>T<br>;<br>c.1072G>T                       | p.Asp353Tyr<br>;<br>p.Asp358Tyr                               | 0 | FALSE | chr7:8135<br>5302:C:A  | 8:chr7:813<br>55302:C:A      | 0.001198 |
| 44_c2-1 | 44 | TP53              | MODERATE; MODIFIER | c.208G>A;<br>c.91G>A; c.<br>279G>A; c.-<br>360G>A | p.Ala70Thr;<br>p.Ala31Thr;                                    | 1 | FALSE | chr17:757<br>9479:C:T  | 8:chr17:75<br>79479:C:T      | 0.001708 |
| 44_c2-1 | 44 | MET               | MODERATE           | c.2980G>A<br>;<br>c.3034G>A                       | p.Glu994Lys<br>;<br>p.Glu1012Ly<br>s                          | 1 | FALSE | chr7:1164<br>11995:G:A | 8:chr7:116<br>411995:G:<br>A | 0.001113 |
| 44_c2-1 | 44 | TP53              | MODERATE; MODIFIER | c.128C>T;<br>c.245C>T;<br>c.-279C>T;<br>c.-360C>T | p.Pro43Leu;<br>p.Pro82Leu;                                    | 6 | FALSE | chr17:757<br>9442:G:A  | 8:chr17:75<br>79442:G:A      | 0.001584 |
| 44_c2-1 | 44 | EGFR;<br>EGFR-AS1 | MODERATE; MODIFIER | c.2576C>A<br>; n.-1G>T                            | p.Ala859Asp<br>;                                              | 1 | FALSE | chr7:5525<br>9518:C:A  | 8:chr7:552<br>59518:C:A      | 0.001377 |
| 44_c2-1 | 44 | KIT               | MODERATE           | c.235C>A                                          | p.Gln79Lys                                                    | 2 | FALSE | chr4:5556<br>1845:C:A  | 8:chr4:555<br>61845:C:A      | 0.001116 |
| 44_c2-1 | 44 | CTNNB1            | MODERATE           | c.1456C>T                                         | p.Arg486Cys                                                   | 0 | FALSE | chr3:4127<br>5290:C:T  | 8:chr3:412<br>75290:C:T      | 0.001052 |
| 44_c2-1 | 44 | CTNNB1            | MODERATE           | c.1972G>T                                         | p.Val658Phe                                                   | 0 | FALSE | chr3:4127<br>8096:G:T  | 8:chr3:412<br>78096:G:T      | 0.001159 |
| 44_c2-1 | 44 | MET               | MODERATE           | c.3443G>A<br>;<br>c.3497G>A                       | p.Arg1148Gl<br>n;<br>p.Arg1166Gl<br>n                         | 4 | FALSE | chr7:1164<br>18932:G:A | 8:chr7:116<br>418932:G:<br>A | 0.001198 |
| 44_c2-1 | 44 | EPHA3             | MODERATE           | c.1082T>C                                         | p.Ile361Thr                                                   | 0 | FALSE | chr3:8939<br>1016:T:C  | 8:chr3:893<br>91016:T:C      | 0.00111  |

|         |    |        |          |                                                 |                                                             |     |       |                        |                              |          |
|---------|----|--------|----------|-------------------------------------------------|-------------------------------------------------------------|-----|-------|------------------------|------------------------------|----------|
| 44_c2-1 | 44 | TP53   | MODERATE | c.341G>A;<br>c.422G>A;<br>c.701G>A;<br>c.818G>A | p.Arg114His;<br>p.Arg141His;<br>p.Arg234His;<br>p.Arg273His | 647 | TRUE  | chr17:757<br>7120:C:T  | 8:chr17:75<br>77120:C:T      | 0.006757 |
| 44_c2-1 | 44 | PTEN   | HIGH     | c.720C>A                                        | p.Tyr240*                                                   | 3   | FALSE | chr10:897<br>17695:C:A | 8:chr10:89<br>717695:C:<br>A | 0.001898 |
| 44_c2-1 | 44 | TP53   | MODERATE | c.128G>T;<br>c.407G>T;<br>c.47G>T;<br>c.524G>T  | p.Arg43Leu;<br>p.Arg136Leu;<br>p.Arg16Leu;<br>p.Arg175Leu   | 979 | FALSE | chr17:757<br>8406:C:A  | 8:chr17:75<br>78406:C:A      | 0.001421 |
| 44_c2-1 | 44 | DDR2   | MODERATE | c.1598C>A                                       | p.Thr533Lys                                                 | 1   | FALSE | chr1:1627<br>41907:C:A | 8:chr1:162<br>741907:C:<br>A | 0.001252 |
| 44_c2-1 | 44 | NF1    | MODERATE | c.2695T>G                                       | p.Leu899Val                                                 | 3   | FALSE | chr17:295<br>56328:T:G | 8:chr17:29<br>556328:T:<br>G | 0.018454 |
| 44_c2-1 | 44 | CTNNB1 | MODERATE | c.1604G>A                                       | p.Arg535Gln                                                 | 0   | FALSE | chr3:4127<br>5709:G:A  | 8:chr3:412<br>75709:G:A      | 0.001234 |
| 44_c2-1 | 44 | RET    | MODERATE | c.1690A>C                                       | p.Thr564Pro                                                 | 1   | FALSE | chr10:436<br>08342:A:C | 8:chr10:43<br>608342:A:<br>C | 0.009753 |
| 44_c2-1 | 44 | BRAF   | HIGH     | c.925G>T                                        | p.Glu309*                                                   | 1   | FALSE | chr7:1405<br>00217:C:A | 8:chr7:140<br>500217:C:<br>A | 0.001485 |
| 44_c2-1 | 44 | TP53   | MODERATE | c.248G>T;<br>c.329G>T;<br>c.608G>T;<br>c.725G>T | p.Cys83Phe;<br>p.Cys110Phe;<br>p.Cys203Phe;<br>p.Cys242Phe  | 72  | FALSE | chr17:757<br>7556:C:A  | 8:chr17:75<br>77556:C:A      | 0.001926 |
| 44_c2-1 | 44 | DDR2   | MODERATE | c.1195C>T                                       | p.Arg399Trp                                                 | 1   | FALSE | chr1:1627<br>37051:C:T | 8:chr1:162<br>737051:C:<br>T | 0.001023 |
| 63_bl-2 | 63 | TP53   | MODERATE | c.167G>T;<br>c.248G>T;<br>c.527G>T;<br>c.644G>T | p.Ser56Ile;<br>p.Ser83Ile;<br>p.Ser176Ile;<br>p.Ser215Ile   | 20  | FALSE | chr17:757<br>8205:C:A  | 9:chr17:75<br>78205:C:A      | 0.001855 |
| 63_bl-2 | 63 | PIK3CA | MODERATE | c.478C>A                                        | p.His160Asn                                                 | 1   | FALSE | chr3:1789<br>17603:C:A | 9:chr3:178<br>917603:C:<br>A | 0.001929 |
| 63_bl-2 | 63 | NF1    | MODERATE | c.2695T>G                                       | p.Leu899Val                                                 | 3   | FALSE | chr17:295<br>56328:T:G | 9:chr17:29<br>556328:T:<br>G | 0.016008 |
| 63_bl-2 | 63 | PIK3CA | MODERATE | c.278G>A                                        | p.Arg93Gln                                                  | 13  | FALSE | chr3:1789<br>16891:G:A | 9:chr3:178<br>916891:G:<br>A | 0.201667 |

|         |    |                             |                    |                                                                                |                                                           |       |       |                     |                       |          |
|---------|----|-----------------------------|--------------------|--------------------------------------------------------------------------------|-----------------------------------------------------------|-------|-------|---------------------|-----------------------|----------|
| 63_bl-2 | 63 | EGFR                        | MODERATE           | c.445C>T                                                                       | p.Arg149Trp                                               | 1     | FALSE | chr7:55214319:C:T   | 9:chr7:55214319:C:T   | 0.002265 |
| 63_bl-2 | 63 | HGF                         | HIGH               | c.1268G>A;<br>c.1283G>A                                                        | p.Trp423*;<br>p.Trp428*                                   | 0     | FALSE | chr7:81346670:C:T   | 9:chr7:81346670:C:T   | 0.207129 |
| 63_bl-2 | 63 | TP53                        | MODERATE           | c.128G>T;<br>c.209G>T;<br>c.488G>T;<br>c.605G>T                                | p.Arg43Leu;<br>p.Arg70Leu;<br>p.Arg163Leu;<br>p.Arg202Leu | 4     | FALSE | chr17:7578244:C:A   | 9:chr17:7578244:C:A   | 0.001768 |
| 63_bl-2 | 63 | RET                         | MODERATE           | c.2236C>A                                                                      | p.Leu746Met                                               | 1     | FALSE | chr10:43612131:C:A  | 9:chr10:43612131:C:A  | 0.001797 |
| 63_bl-2 | 63 | AKT1                        | MODERATE           | c.1099C>T                                                                      | p.Arg367Cys                                               | 1     | FALSE | chr14:105239288:G:A | 9:chr14:105239288:G:A | 0.002195 |
| 63_bl-2 | 63 | NF1                         | MODERATE           | c.5420G>A;<br>c.5483G>A                                                        | p.Arg1807Gln;<br>p.Arg1828Gln                             | 2     | FALSE | chr17:29654731:G:A  | 9:chr17:29654731:G:A  | 0.0016   |
| 63_bl-2 | 63 | DDR2                        | MODERATE           | c.313C>A                                                                       | p.Arg105Ser                                               | 2     | FALSE | chr1:162724541:C:A  | 9:chr1:162724541:C:A  | 0.002373 |
| 63_bl-2 | 63 | CTNNB1                      | MODERATE           | c.884C>A                                                                       | p.Ala295Asp                                               | 0     | FALSE | chr3:41267300:C:A   | 9:chr3:41267300:C:A   | 0.002119 |
| 63_bl-2 | 63 | MET                         | MODERATE           | c.959C>T                                                                       | p.Ala320Val                                               | 1     | FALSE | chr7:116340097:C:T  | 9:chr7:116340097:C:T  | 0.001679 |
| 63_bl-2 | 63 | CTNNB1                      | MODERATE           | c.91C>A                                                                        | p.Leu31Met                                                | 0     | FALSE | chr3:41266094:C:A   | 9:chr3:41266094:C:A   | 0.001914 |
| 63_bl-2 | 63 | KRAS                        | MODERATE           | c.35G>T                                                                        | p.Gly12Val                                                | 11213 | FALSE | chr12:25398284:C:A  | 9:chr12:25398284:C:A  | 0.209607 |
| 63_bl-2 | 63 | NF1                         | MODERATE           | c.1319G>A                                                                      | p.Arg440Gln                                               | 1     | FALSE | chr17:29533316:G:A  | 9:chr17:29533316:G:A  | 0.004926 |
| 63_bl-2 | 63 | AKT3                        | MODERATE           | c.425G>T                                                                       | p.Arg142Ile                                               | 0     | FALSE | chr1:243809199:C:A  | 9:chr1:243809199:C:A  | 0.002558 |
| 63_bl-2 | 63 | ERBB2;<br>MIEN1;<br>MIR4728 | MODERATE; MODIFIER | c.3025G>A;<br>c.3070G>A;<br>c.3115G>A;<br>n.3439G>A;<br>c.*388C>T;<br>n.*67G>A | p.Ala1009Thr;<br>p.Ala1024Thr;<br>p.Ala1039Thr;           | 2     | FALSE | chr17:37883212:G:A  | 9:chr17:37883212:G:A  | 0.005602 |

|         |    |        |                    |                                               |                                                   |       |       |                        |                                |          |
|---------|----|--------|--------------------|-----------------------------------------------|---------------------------------------------------|-------|-------|------------------------|--------------------------------|----------|
| 63_bl-2 | 63 | TP53   | MODIFIER; MODERATE | c.-9G>T;<br>c.352G>T;<br>c.469G>T;<br>c.73G>T | ; p.Val118Phe<br>;<br>p.Val157Phe<br>; p.Val25Phe | 169   | FALSE | chr17:757<br>8461:C:A  | 9:chr17:75<br>78461:C:A        | 0.002407 |
| 63_bl-2 | 63 | RET    | HIGH               | c.1827C>A                                     | p.Cys609*                                         | 1     | FALSE | chr10:436<br>09071:C:A | 9:chr10:43<br>609071:C:<br>A   | 0.002227 |
| 63_bl-2 | 63 | KRAS   | HIGH               | c.292G>T                                      | p.Glu98*                                          | 1     | FALSE | chr12:253<br>78706:C:A | 9:chr12:25<br>378706:C:<br>A   | 0.002237 |
| 63_bl-2 | 63 | RET    | MODERATE           | c.1690A>C                                     | p.Thr564Pro                                       | 1     | FALSE | chr10:436<br>08342:A:C | 9:chr10:43<br>608342:A:<br>C   | 0.008491 |
| 63_bl-2 | 63 | CTNNB1 | MODERATE           | c.96C>A                                       | p.Asp32Glu                                        | 0     | FALSE | chr3:4126<br>6099:C:A  | 9:chr3:412<br>66099:C:A        | 0.001955 |
| 63_bl-2 | 63 | ALK    | MODERATE           | c.3824G>T                                     | p.Arg1275Leu                                      | 79    | FALSE | chr2:2943<br>2664:C:A  | 9:chr2:294<br>32664:C:A        | 0.001953 |
| 63_bl-2 | 63 | EPHA3  | HIGH               | c.1153C>T                                     | p.Arg385*                                         | 0     | FALSE | chr3:8939<br>1087:C:T  | 9:chr3:893<br>91087:C:T        | 0.001704 |
| 63_bl-2 | 63 | PTEN   | MODERATE           | c.424C>T                                      | p.Arg142Trp                                       | 6     | FALSE | chr10:896<br>92940:C:T | 9:chr10:89<br>692940:C:<br>T   | 0.001857 |
| 63_bl-2 | 63 | KIT    | MODERATE           | c.2579C>T;<br>c.2591C>T                       | p.Ser860Phe<br>;<br>p.Ser864Phe                   | 2     | FALSE | chr4:5560<br>2770:C:T  | 9:chr4:556<br>02770:C:T        | 0.002473 |
| 63_bl-2 | 63 | CTNNB1 | MODERATE           | c.125C>A                                      | p.Thr42Lys                                        | 0     | FALSE | chr3:4126<br>6128:C:A  | 9:chr3:412<br>66128:C:A        | 0.003876 |
| 63_bl-2 | 63 | EPHA3  | MODERATE           | c.1132C>A                                     | p.Pro378Thr                                       | 0     | FALSE | chr3:8939<br>1066:C:A  | 9:chr3:893<br>91066:C:A        | 0.001649 |
| 63_bl-2 | 63 | PTEN   | MODERATE           | c.389G>A                                      | p.Arg130Gln                                       | 89    | FALSE | chr10:896<br>92905:G:A | 9:chr10:89<br>692905:G:<br>A   | 0.001689 |
| 63_bl-2 | 63 | PIK3CA | MODERATE           | c.3140A>T                                     | p.His1047Leu                                      | 1717  | FALSE | chr3:1789<br>52085:A:T | 9:chr3:178<br>952085:A:<br>T   | 0.219809 |
| 63_bl-2 | 63 | TP53   | MODIFIER; MODERATE | c.-5G>T;<br>c.356G>T;<br>c.473G>T;<br>c.77G>T | ; p.Arg119Leu<br>;<br>p.Arg158Leu<br>; p.Arg26Leu | 80    | FALSE | chr17:757<br>8457:C:A  | 9:chr17:75<br>78457:C:A        | 0.002466 |
| 25_c5-1 | 25 | RET    | MODERATE           | c.1444C>T                                     | p.His482Tyr                                       | 1     | FALSE | chr10:436<br>06835:C:T | 10:chr10:4<br>3606835:C:<br>:T | 0.002035 |
| 25_c5-1 | 25 | MAP2K1 | MODERATE           | c.371C>T                                      | p.Pro124Leu                                       | 1     | FALSE | chr15:667<br>29163:C:T | 10:chr15:6<br>6729163:C:<br>:T | 0.001916 |
| 25_c5-1 | 25 | BRAF   | MODERATE           | c.1799T>A                                     | p.Val600Glu                                       | 23024 | FALSE | chr7:1404<br>53136:A:T | 10:chr7:14<br>0453136:A:<br>:T | 0.005476 |

|           |    |                   |                    |                                                                |                                                                         |    |       |                    |                       |          |
|-----------|----|-------------------|--------------------|----------------------------------------------------------------|-------------------------------------------------------------------------|----|-------|--------------------|-----------------------|----------|
| 25_c5-1   | 25 | NF1               | MODERATE           | c.3407G>A                                                      | p.Arg1136Gln                                                            | 2  | FALSE | chr17:29559810:G:A | 10:chr17:29559810:G:A | 0.002215 |
| 25_c5-1   | 25 | TP53              | MODERATE; MODIFIER | c.140C>T;<br>c.257C>T;<br>c.-279C>T;<br>c.-360C>T              | p.Ala47Val;<br>p.Ala86Val;                                              | 1  | FALSE | chr17:7579430:G:A  | 10:chr17:7579430:G:A  | 0.002695 |
| 25_c5-1   | 25 | MET               | MODERATE           | c.1690G>A                                                      | p.Ala564Thr                                                             | 1  | FALSE | chr7:116381068:G:A | 10:chr7:116381068:G:A | 0.002169 |
| 25_c5-1   | 25 | EGFR;<br>EGFR-AS1 | MODERATE; MODIFIER | c.2305G>A<br>;<br>n.1257C>T                                    | p.Val769Met;                                                            | 3  | FALSE | chr7:55249007:G:A  | 10:chr7:55249007:G:A  | 0.001967 |
| 25_c5-1   | 25 | NF1               | MODIFIER; HIGH     | c.*2165G>A;<br>c.2088G>A                                       | ; p.Trp696*                                                             | 1  | FALSE | chr17:29553539:G:A | 10:chr17:29553539:G:A | 0.002195 |
| 25_c5-1   | 25 | BRAF              | MODERATE           | c.386C>T                                                       | p.Ser129Leu                                                             | 2  | FALSE | chr7:140534527:G:A | 10:chr7:140534527:G:A | 0.002381 |
| 25_c5-1   | 25 | PIK3R1            | MODERATE           | c.1096G>A<br>;<br>c.1186G>A<br>;<br>c.1996G>A<br>;<br>c.907G>A | p.Glu366Lys<br>;<br>p.Glu396Lys<br>;<br>p.Glu666Lys<br>;<br>p.Glu303Lys | 2  | FALSE | chr5:67593250:G:A  | 10:chr5:67593250:G:A  | 0.002755 |
| 25_c5-1   | 25 | TP53              | MODIFIER; MODERATE | c.-3G>T;<br>c.358G>T;<br>c.475G>T;<br>c.79G>T                  | ; p.Ala120Ser;<br>p.Ala159Ser;<br>p.Ala27Ser                            | 23 | FALSE | chr17:7578455:C:A  | 10:chr17:7578455:C:A  | 0.002252 |
| 25_c5-1   | 25 | RET               | MODERATE           | c.1379A>T                                                      | p.Asp460Val                                                             | 1  | FALSE | chr10:43606770:A:T | 10:chr10:43606770:A:T | 0.001944 |
| 26_c1d1-1 | 26 | DDR2              | MODERATE           | c.2255G>A                                                      | p.Arg752His                                                             | 1  | FALSE | chr1:162746132:G:A | 11:chr1:162746132:G:A | 0.001385 |
| 26_c1d1-1 | 26 | NF1               | MODERATE           | c.4030G>A                                                      | p.Glu1344Lys                                                            | 2  | FALSE | chr17:29576057:G:A | 11:chr17:29576057:G:A | 0.001661 |
| 26_c1d1-1 | 26 | EPHA3             | HIGH               | c.318C>A                                                       | p.Cys106*                                                               | 0  | FALSE | chr3:89259174:C:A  | 11:chr3:89259174:C:A  | 0.001775 |
| 26_c1d1-1 | 26 | KIT               | MODERATE           | c.235C>A                                                       | p.Gln79Lys                                                              | 2  | FALSE | chr4:55561845:C:A  | 11:chr4:55561845:C:A  | 0.002389 |
| 26_c1d1-1 | 26 | ALK               | MODERATE           | c.4255G>A                                                      | p.Glu1419Lys                                                            | 1  | FALSE | chr2:29416698:C:T  | 11:chr2:29416698:C:T  | 0.001452 |



|           |    |        |                    |                                                                             |                                                               |       |       |                        |                               |          |
|-----------|----|--------|--------------------|-----------------------------------------------------------------------------|---------------------------------------------------------------|-------|-------|------------------------|-------------------------------|----------|
| 26_c1d1-1 | 26 | TP53   | MODERATE; MODIFIER | c.100G>T;<br>c.217G>T;<br>c.-279G>T;<br>c.-360G>T                           | p.Val34Leu;<br>p.Val73Leu;                                    | 5     | FALSE | chr17:757<br>9470:C:A  | 11:chr17:7<br>579470:C:<br>A  | 0.002181 |
| 26_c1d1-1 | 26 | PIK3CA | MODERATE           | c.277C>T                                                                    | p.Arg93Trp                                                    | 24    | FALSE | chr3:1789<br>16890:C:T | 11:chr3:17<br>8916890:C<br>:T | 0.001653 |
| 26_c1d1-1 | 26 | CWH43  | MODERATE           | c.1741C>T;<br>c.1822C>T                                                     | p.His581Tyr;<br>p.His608Tyr                                   | 0     | FALSE | chr4:4904<br>6821:C:T  | 11:chr4:49<br>046821:C:<br>T  | 0.001617 |
| 26_c1d1-1 | 26 | HGF    | MODERATE           | c.1307G>A<br>;<br>c.1322G>A                                                 | p.Arg436Gln<br>;<br>p.Arg441Gln                               | 0     | FALSE | chr7:8134<br>6631:C:T  | 11:chr7:81<br>346631:C:<br>T  | 0.001781 |
| 26_c1d1-1 | 26 | EGFR   | MODERATE           | c.787A>C                                                                    | p.Thr263Pro                                                   | 6     | FALSE | chr7:5522<br>1743:A:C  | 11:chr7:55<br>221743:A:<br>C  | 0.001712 |
| 26_c1d1-1 | 26 | CTNNB1 | MODERATE           | c.157G>A                                                                    | p.Glu53Lys                                                    | 0     | FALSE | chr3:4126<br>6160:G:A  | 11:chr3:41<br>266160:G:<br>A  | 0.001496 |
| 26_c1d1-1 | 26 | ALK    | MODERATE           | c.4280C>T                                                                   | p.Ser1427Ph<br>e                                              | 2     | FALSE | chr2:2941<br>6673:G:A  | 11:chr2:29<br>416673:G:<br>A  | 0.001464 |
| 26_c1d1-1 | 26 | CTNNB1 | MODERATE           | c.122C>A                                                                    | p.Thr41Asn                                                    | 0     | FALSE | chr3:4126<br>6125:C:A  | 11:chr3:41<br>266125:C:<br>A  | 0.002295 |
| 26_c1d1-1 | 26 | BRAF   | MODERATE           | c.1799T>A                                                                   | p.Val600Glu                                                   | 23024 | FALSE | chr7:1404<br>53136:A:T | 11:chr7:14<br>0453136:A<br>:T | 0.04721  |
| 26_c1d1-1 | 26 | TP53   | MODERATE           | c.110G>A;<br>c.191G>A;<br>c.470G>A;<br>c.587G>A                             | p.Arg37Gln;<br>p.Arg64Gln;<br>p.Arg157Gln<br>;<br>p.Arg196Gln | 19    | FALSE | chr17:757<br>8262:C:T  | 11:chr17:7<br>578262:C:<br>T  | 0.001862 |
| 26_c1d1-1 | 26 | PTEN   | MODERATE           | c.392C>A                                                                    | p.Thr131Asn                                                   | 2     | FALSE | chr10:896<br>92908:C:A | 11:chr10:8<br>9692908:C<br>:A | 0.002475 |
| 64_bl-2   | 64 | KRAS   | HIGH               | c.292G>T                                                                    | p.Glu98*                                                      | 1     | FALSE | chr12:253<br>78706:C:A | 12:chr12:2<br>5378706:C<br>:A | 0.002837 |
| 64_bl-2   | 64 | KRAS   | MODERATE           | c.181C>A                                                                    | p.Gln61Lys                                                    | 40    | FALSE | chr12:253<br>80277:G:T | 12:chr12:2<br>5380277:G<br>:T | 0.002894 |
| 64_bl-2   | 64 | TP53   | MODIFIER; HIGH     | c.*131C>T;<br>c.*43C>T;<br>c.1024C>T;<br>c.547C>T;<br>c.628C>T;<br>c.907C>T | p.Arg342*;<br>p.Arg183*;<br>p.Arg210*;<br>p.Arg303*           | 111   | FALSE | chr17:757<br>4003:G:A  | 12:chr17:7<br>574003:G:<br>A  | 0.004944 |

|         |    |                    |                    |                                                 |                                                                         |    |       |                        |                               |          |
|---------|----|--------------------|--------------------|-------------------------------------------------|-------------------------------------------------------------------------|----|-------|------------------------|-------------------------------|----------|
| 64_bl-2 | 64 | DDR2               | MODERATE           | c.1598C>A                                       | p.Thr533Lys                                                             | 1  | FALSE | chr1:1627<br>41907:C:A | 12:chr1:16<br>2741907:C<br>:A | 0.002706 |
| 64_bl-2 | 64 | EGFR;<br>EGFR-AS1  | MODERATE; MODIFIER | c.2591C>A<br>; n.-1G>T                          | p.Ala864Glu<br>;                                                        | 2  | FALSE | chr7:5525<br>9533:C:A  | 12:chr7:55<br>259533:C:<br>A  | 0.002985 |
| 64_bl-2 | 64 | MAP2K1             | MODERATE           | c.198C>A                                        | p.Asp66Glu                                                              | 4  | FALSE | chr15:667<br>27482:C:A | 12:chr15:6<br>6727482:C<br>:A | 0.003619 |
| 64_bl-2 | 64 | TP53               | MODERATE           | c.364G>T;<br>c.445G>T;<br>c.724G>T;<br>c.841G>T | p.Asp122Tyr<br>;<br>p.Asp149Tyr<br>;<br>p.Asp242Tyr<br>;<br>p.Asp281Tyr | 28 | FALSE | chr17:757<br>7097:C:A  | 12:chr17:7<br>577097:C:<br>A  | 0.002915 |
| 64_bl-2 | 64 | ALK                | HIGH               | c.1846G>T                                       | p.Gly616*                                                               | 1  | FALSE | chr2:2949<br>8334:C:A  | 12:chr2:29<br>498334:C:<br>A  | 0.002564 |
| 64_bl-2 | 64 | TP53               | MODIFIER; MODERATE | c.-3G>T;<br>c.358G>T;<br>c.475G>T;<br>c.79G>T   | p.Ala120Ser;<br>p.Ala159Ser;<br>p.Ala27Ser                              | 23 | FALSE | chr17:757<br>8455:C:A  | 12:chr17:7<br>578455:C:<br>A  | 0.003058 |
| 64_bl-2 | 64 | EGFR;<br>EGFR-AS1  | LOW; MODIFIER      | c.2472C>A<br>; n.-1G>T                          | p.Gly824Gly<br>;                                                        | 1  | FALSE | chr7:5525<br>9414:C:A  | 12:chr7:55<br>259414:C:<br>A  | 0.006048 |
| 64_bl-2 | 64 | HOXD-AS2;<br>HOXD8 | MODIFIER; MODERATE | n.*692G>T<br>; c.22C>A;<br>c.574C>A             | p.Gln8Lys;<br>p.Gln192Lys                                               | 0  | FALSE | chr2:1769<br>95668:C:A | 12:chr2:17<br>6995668:C<br>:A | 0.003295 |
| 68_bl-2 | 68 | EGFR               | MODERATE           | c.738C>A                                        | p.Ser246Arg                                                             | 2  | FALSE | chr7:5522<br>0348:C:A  | 13:chr7:55<br>220348:C:<br>A  | 0.001883 |
| 68_bl-2 | 68 | EGFR;<br>EGFR-AS1  | MODERATE; MODIFIER | c.2572C>A<br>; n.-1G>T                          | p.Leu858Me<br>t;                                                        | 8  | FALSE | chr7:5525<br>9514:C:A  | 13:chr7:55<br>259514:C:<br>A  | 0.002562 |
| 68_bl-2 | 68 | ALK                | MODERATE           | c.886G>A                                        | p.Glu296Lys                                                             | 1  | FALSE | chr2:2991<br>7782:C:T  | 13:chr2:29<br>917782:C:<br>T  | 0.001386 |
| 68_bl-2 | 68 | TP53               | MODERATE           | c.178C>T;<br>c.259C>T;<br>c.538C>T;<br>c.655C>T | p.Pro60Ser;<br>p.Pro87Ser;<br>p.Pro180Ser<br>;<br>p.Pro219Ser           | 4  | FALSE | chr17:757<br>8194:G:A  | 13:chr17:7<br>578194:G:<br>A  | 0.003487 |
| 68_bl-2 | 68 | NF1                | MODERATE           | c.2695T>G                                       | p.Leu899Val                                                             | 3  | FALSE | chr17:295<br>56328:T:G | 13:chr17:2<br>9556328:T<br>:G | 0.020218 |
| 68_bl-2 | 68 | PIK3CA             | MODERATE           | c.518C>A                                        | p.Ser173Tyr                                                             | 1  | FALSE | chr3:1789<br>17643:C:A | 13:chr3:17<br>8917643:C<br>:A | 0.001376 |
| 68_bl-2 | 68 | ALK                | MODERATE           | c.1588G>A                                       | p.Glu530Lys                                                             | 1  | FALSE | chr2:2954<br>1229:C:T  | 13:chr2:29<br>541229:C:<br>T  | 0.002095 |

|         |    |                   |                    |                                                 |                                                                    |     |       |                        |                           |          |
|---------|----|-------------------|--------------------|-------------------------------------------------|--------------------------------------------------------------------|-----|-------|------------------------|---------------------------|----------|
| 68_bl-2 | 68 | GNA11             | MODERATE           | c.440G>A                                        | p.Arg147His                                                        | 1   | FALSE | chr19:311<br>3446:G:A  | 13:chr19:3<br>113446:G:A  | 0.001791 |
| 68_bl-2 | 68 | ALK               | MODERATE           | c.3184A>G                                       | p.Lys1062Glu                                                       | 1   | FALSE | chr2:2944<br>6383:T:C  | 13:chr2:29<br>446383:T:C  | 0.001296 |
| 68_bl-2 | 68 | RET               | MODERATE           | c.1696C>A                                       | p.Pro566Thr                                                        | 1   | FALSE | chr10:436<br>08348:C:A | 13:chr10:4<br>3608348:C:A | 0.001434 |
| 68_bl-2 | 68 | EGFR;<br>EGFR-AS1 | LOW; MODIFIER      | c.2472C>A<br>; n.-1G>T                          | p.Gly824Gly                                                        | 1   | FALSE | chr7:5525<br>9414:C:A  | 13:chr7:55<br>259414:C:A  | 0.002581 |
| 68_bl-2 | 68 | BRAF              | MODERATE           | c.1202C>T                                       | p.Thr401Ile                                                        | 1   | FALSE | chr7:1404<br>82933:G:A | 13:chr7:14<br>0482933:G:A | 0.001949 |
| 68_bl-2 | 68 | CWH43             | MODERATE           | c.1601A>G<br>;<br>c.1682A>G                     | p.Gln534Arg<br>;<br>p.Gln561Arg                                    | 0   | FALSE | chr4:4904<br>0076:A:G  | 13:chr4:49<br>040076:A:G  | 0.001775 |
| 68_bl-2 | 68 | TP53              | MODERATE           | c.269G>T;<br>c.350G>T;<br>c.629G>T;<br>c.746G>T | p.Arg90Met;<br>p.Arg117Met;<br>p.Arg210Met;<br>p.Arg249Met         | 36  | FALSE | chr17:757<br>7535:C:A  | 13:chr17:7<br>577535:C:A  | 0.066898 |
| 68_bl-2 | 68 | TP53              | MODERATE           | c.270G>T;<br>c.351G>T;<br>c.630G>T;<br>c.747G>T | p.Arg90Ser;<br>p.Arg117Ser<br>;<br>p.Arg210Ser<br>;<br>p.Arg249Ser | 318 | FALSE | chr17:757<br>7534:C:A  | 13:chr17:7<br>577534:C:A  | 0.068063 |
| 68_bl-2 | 68 | DDR2              | MODERATE           | c.700G>A                                        | p.Asp234Asn                                                        | 1   | FALSE | chr1:1627<br>29614:G:A | 13:chr1:16<br>2729614:G:A | 0.001453 |
| 68_bl-2 | 68 | PTEN              | MODERATE           | c.452C>A                                        | p.Ala151Asp                                                        | 1   | FALSE | chr10:896<br>92968:C:A | 13:chr10:8<br>9692968:C:A | 0.001781 |
| 68_bl-2 | 68 | PTEN              | HIGH               | c.633C>A                                        | p.Cys211*                                                          | 2   | FALSE | chr10:897<br>12015:C:A | 13:chr10:8<br>9712015:C:A | 0.002066 |
| 68_bl-2 | 68 | FGFR1             | MODIFIER; MODERATE | c.-85G>T;<br>c.107G>T;<br>c.8G>T                | ; p.Ser36Ile;<br>p.Ser3Ile                                         | 1   | FALSE | chr8:3831<br>4957:C:A  | 13:chr8:38<br>314957:C:A  | 0.002072 |
| 68_bl-2 | 68 | EGFR              | MODERATE           | c.755G>A                                        | p.Arg252His                                                        | 3   | FALSE | chr7:5522<br>1711:G:A  | 13:chr7:55<br>221711:G:A  | 0.00161  |
| 68_bl-2 | 68 | PIK3CA            | MODERATE           | c.1624G>A                                       | p.Glu542Lys                                                        | 777 | FALSE | chr3:1789<br>36082:G:A | 13:chr3:17<br>8936082:G:A | 0.029542 |
| 68_bl-2 | 68 | PTEN              | HIGH               | c.720C>A                                        | p.Tyr240*                                                          | 3   | FALSE | chr10:897<br>17695:C:A | 13:chr10:8<br>9717695:C:A | 0.001786 |
| 68_bl-2 | 68 | KIT               | MODERATE           | c.1888C>T;<br>c.1900C>T                         | p.Arg630Trp<br>;<br>p.Arg634Trp                                    | 2   | FALSE | chr4:5559<br>4197:C:T  | 13:chr4:55<br>594197:C:T  | 0.001521 |

|         |    |                   |                    |                                                         |                                                                         |    |       |                             |                                |          |
|---------|----|-------------------|--------------------|---------------------------------------------------------|-------------------------------------------------------------------------|----|-------|-----------------------------|--------------------------------|----------|
| 68_bl-2 | 68 | KLLN;<br>PTEN     | MODIFIER; LOW      | c.-951G>T;<br>c.78C>A                                   | ; p.Thr26Thr                                                            | 2  | FALSE | chr10:896<br>24304:C:A      | 13:chr10:8<br>9624304:C<br>:A  | 0.002653 |
| 68_bl-2 | 68 | CTNNB1            | MODERATE           | c.125C>A                                                | p.Thr42Lys                                                              | 0  | FALSE | chr3:4126<br>6128:C:A       | 13:chr3:41<br>266128:C:<br>A   | 0.001674 |
| 66_bl-2 | 66 | MITF              | MODIFIER; MODERATE | c.-<br>53+197C><br>A;<br>c.104+241<br>88C>A;<br>c.48C>A | ; p.Phe16Leu                                                            | 0  | FALSE | chr3:6981<br>3040:C:A       | 14:chr3:69<br>813040:C:<br>A   | 0.001151 |
| 66_bl-2 | 66 | EGFR;<br>EGFR-AS1 | MODERATE; MODIFIER | c.2350T>C;<br>n.1212A>G                                 | ; p.Ser784Pro                                                           | 4  | FALSE | chr7:5524<br>9052:T:C       | 14:chr7:55<br>249052:T:<br>C   | 0.000979 |
| 66_bl-2 | 66 | NF1               | HIGH               | c.1307C>A                                               | p.Ser436*                                                               | 1  | FALSE | chr17:295<br>33304:C:A      | 14:chr17:2<br>9533304:C<br>:A  | 0.001188 |
| 66_bl-2 | 66 | CTNNB1            | MODERATE           | c.96C>A                                                 | p.Asp32Glu                                                              | 0  | FALSE | chr3:4126<br>6099:C:A       | 14:chr3:41<br>266099:C:<br>A   | 0.001868 |
| 66_bl-2 | 66 | TP53              | MODIFIER; MODERATE | c.-74G>A;<br>c.287G>A;<br>c.404G>A;<br>c.8G>A           | ; p.Cys96Tyr;<br>p.Cys135Tyr<br>; p.Cys3Tyr                             | 59 | FALSE | chr17:757<br>8526:C:T       | 14:chr17:7<br>578526:C:<br>T   | 0.50272  |
| 66_bl-2 | 66 | KIT               | MODERATE           | c.1493G>A                                               | p.Gly498Asp                                                             | 1  | FALSE | chr4:5559<br>2169:G:A       | 14:chr4:55<br>592169:G:<br>A   | 0.001373 |
| 66_bl-2 | 66 | MAP2K1            | MODERATE           | c.379G>A                                                | p.Val127Met                                                             | 1  | FALSE | chr15:667<br>29171:G:A      | 14:chr15:6<br>6729171:G<br>:A  | 0.000865 |
| 66_bl-2 | 66 | EPHA3             | MODERATE           | c.1812C>A                                               | p.Asp604Glu                                                             | 0  | FALSE | chr3:8946<br>2340:C:A       | 14:chr3:89<br>462340:C:<br>A   | 0.001063 |
| 66_bl-2 | 66 | EGFR;<br>EGFR-AS1 | LOW; MODIFIER      | c.2472C>A<br>; n.-1G>T                                  | p.Gly824Gly                                                             | 1  | FALSE | chr7:5525<br>9414:C:A       | 14:chr7:55<br>259414:C:<br>A   | 0.002423 |
| 66_bl-2 | 66 | MAP2K1            | MODERATE           | c.198C>A                                                | p.Asp66Glu                                                              | 4  | FALSE | chr15:667<br>27482:C:A      | 14:chr15:6<br>6727482:C<br>:A  | 0.001076 |
| 66_bl-2 | 66 | EPHA3             | MODERATE           | c.2662C>A                                               | p.Leu888Met                                                             | 0  | FALSE | chr3:8949<br>9492:C:A       | 14:chr3:89<br>499492:C:<br>A   | 0.001015 |
| 66_bl-2 | 66 | TP53              | MODERATE           | c.400G>T;<br>c.481G>T;<br>c.760G>T;<br>c.877G>T         | p.Gly134Trp<br>;<br>p.Gly161Trp<br>;<br>p.Gly254Trp<br>;<br>p.Gly293Trp | 4  | FALSE | chr17:757<br>7061:C:A       | 14:chr17:7<br>577061:C:<br>A   | 0.001017 |
| 66_bl-2 | 66 | DDR2              | MODERATE           | c.1598C>A                                               | p.Thr533Lys                                                             | 1  | FALSE | chr1:1627<br>41907:C:A      | 14:chr1:16<br>2741907:C<br>:A  | 0.001288 |
| 66_bl-2 | 66 | AKT1              | MODERATE           | c.340G>C                                                | p.Glu114Gln                                                             | 1  | FALSE | chr14:105<br>242084:C:<br>G | 14:chr14:1<br>05242084:<br>C:G | 0.001875 |

|         |    |                    |                    |                                                 |                                                                         |     |       |                        |                               |          |
|---------|----|--------------------|--------------------|-------------------------------------------------|-------------------------------------------------------------------------|-----|-------|------------------------|-------------------------------|----------|
| 66_bl-2 | 66 | FGFR1              | MODIFIER; MODERATE | c.-85G>T;<br>c.107G>T;<br>c.8G>T                | ; p.Ser36Ile;<br>p.Ser3Ile                                              | 1   | FALSE | chr8:3831<br>4957:C:A  | 14:chr8:38<br>314957:C:<br>A  | 0.001205 |
| 66_bl-2 | 66 | TP53               | MODIFIER; MODERATE | c.-5G>T;<br>c.356G>T;<br>c.473G>T;<br>c.77G>T   | ; p.Arg119Leu<br>; p.Arg158Leu<br>; p.Arg26Leu                          | 80  | FALSE | chr17:757<br>8457:C:A  | 14:chr17:7<br>578457:C:<br>A  | 0.0013   |
| 66_bl-2 | 66 | MET                | MODERATE           | c.3973G>A<br>;<br>c.4027G>A                     | p.Glu1325Ly<br>s;<br>p.Glu1343Ly<br>s                                   | 1   | FALSE | chr7:1164<br>35978:G:A | 14:chr7:11<br>6435978:G:<br>A | 0.001017 |
| 66_bl-2 | 66 | HOXD-AS2;<br>HOXD8 | MODIFIER; MODERATE | n.*692G>T<br>; c.22C>A;<br>c.574C>A             | ; p.Gln8Lys;<br>p.Gln192Lys                                             | 0   | FALSE | chr2:1769<br>95668:C:A | 14:chr2:17<br>6995668:C:<br>A | 0.001512 |
| 66_bl-2 | 66 | PIK3R1             | MODERATE           | c.629C>A                                        | p.Ala210Asp                                                             | 1   | FALSE | chr5:6757<br>5556:C:A  | 14:chr5:67<br>575556:C:<br>A  | 0.001559 |
| 66_bl-2 | 66 | HOXD-AS2;<br>HOXD8 | MODIFIER; MODERATE | n.*692G>T<br>; c.-123-<br>62C>A;<br>c.368C>A    | ; p.Pro123His                                                           | 0   | FALSE | chr2:1769<br>95462:C:A | 14:chr2:17<br>6995462:C:<br>A | 0.001986 |
| 66_bl-2 | 66 | TP53               | MODIFIER; MODERATE | c.-9G>T;<br>c.352G>T;<br>c.469G>T;<br>c.73G>T   | ; p.Val118Phe<br>; p.Val157Phe<br>; p.Val25Phe                          | 169 | FALSE | chr17:757<br>8461:C:A  | 14:chr17:7<br>578461:C:<br>A  | 0.001283 |
| 66_bl-2 | 66 | CTNNB1             | MODERATE           | c.91C>A                                         | p.Leu31Met                                                              | 0   | FALSE | chr3:4126<br>6094:C:A  | 14:chr3:41<br>266094:C:<br>A  | 0.002477 |
| 66_bl-2 | 66 | TP53               | MODERATE           | c.358G>T;<br>c.439G>T;<br>c.718G>T;<br>c.835G>T | p.Gly120Trp<br>;<br>p.Gly147Trp<br>;<br>p.Gly240Trp<br>;<br>p.Gly279Trp | 7   | FALSE | chr17:757<br>7103:C:A  | 14:chr17:7<br>577103:C:<br>A  | 0.001103 |
| 66_bl-2 | 66 | DDR2               | MODERATE           | c.313C>A                                        | p.Arg105Ser                                                             | 2   | FALSE | chr1:1627<br>24541:C:A | 14:chr1:16<br>2724541:C:<br>A | 0.000988 |
| 66_bl-2 | 66 | CTNNB1             | MODERATE           | c.86C>A                                         | p.Ser29Tyr                                                              | 0   | FALSE | chr3:4126<br>6089:C:A  | 14:chr3:41<br>266089:C:<br>A  | 0.00126  |
| 66_bl-2 | 66 | TP53               | HIGH               | c.319G>T;<br>c.400G>T;<br>c.679G>T;<br>c.796G>T | p.Gly107*;<br>p.Gly134*;<br>p.Gly227*;<br>p.Gly266*                     | 38  | FALSE | chr17:757<br>7142:C:A  | 14:chr17:7<br>577142:C:<br>A  | 0.00148  |

|         |    |        |                    |                                                                           |                                                                                                                 |    |       |                        |                               |          |
|---------|----|--------|--------------------|---------------------------------------------------------------------------|-----------------------------------------------------------------------------------------------------------------|----|-------|------------------------|-------------------------------|----------|
| 66_bl-2 | 66 | ALK    | MODERATE           | c.536G>A                                                                  | p.Arg179His                                                                                                     | 1  | FALSE | chr2:3014<br>2990:C:T  | 14:chr2:30<br>142990:C:<br>T  | 0.00091  |
| 66_bl-2 | 66 | TP53   | HIGH               | c.142G>T;<br>c.421G>T;<br>c.538G>T;<br>c.61G>T                            | p.Glu48*;<br>p.Glu141*;<br>p.Glu180*;<br>p.Glu21*                                                               | 14 | FALSE | chr17:757<br>8392:C:A  | 14:chr17:7<br>578392:C:<br>A  | 0.001144 |
| 66_bl-2 | 66 | NRAS   | MODERATE           | c.394G>A                                                                  | p.Glu132Lys                                                                                                     | 2  | FALSE | chr1:1152<br>52246:C:T | 14:chr1:11<br>5252246:C:<br>T | 0.001142 |
| 66_bl-2 | 66 | EPHA3  | MODERATE           | c.1234G>A                                                                 | p.Val412Ile                                                                                                     | 0  | FALSE | chr3:8939<br>1168:G:A  | 14:chr3:89<br>391168:G:<br>A  | 0.000982 |
| 66_bl-2 | 66 | RET    | MODERATE           | c.1385C>T                                                                 | p.Ser462Leu                                                                                                     | 1  | FALSE | chr10:436<br>06776:C:T | 14:chr10:4<br>3606776:C:<br>T | 0.000963 |
| 66_bl-2 | 66 | EPHA3  | HIGH               | c.1515C>A                                                                 | p.Tyr505*                                                                                                       | 0  | FALSE | chr3:8944<br>8551:C:A  | 14:chr3:89<br>448551:C:<br>A  | 0.001265 |
| 66_bl-2 | 66 | PTEN   | MODERATE           | c.443C>A                                                                  | p.Ala148Glu                                                                                                     | 1  | FALSE | chr10:896<br>92959:C:A | 14:chr10:8<br>9692959:C:<br>A | 0.001353 |
| 66_bl-2 | 66 | TP53   | MODIFIER; MODERATE | c.-3G>T;<br>c.358G>T;<br>c.475G>T;<br>c.79G>T                             | p.Ala120Ser;<br>p.Ala159Ser;<br>p.Ala27Ser                                                                      | 23 | FALSE | chr17:757<br>8455:C:A  | 14:chr17:7<br>578455:C:<br>A  | 0.001285 |
| 66_bl-2 | 66 | CTNNB1 | MODERATE           | c.497T>G                                                                  | p.Val166Gly                                                                                                     | 0  | FALSE | chr3:4126<br>6826:T:G  | 14:chr3:41<br>266826:T:<br>G  | 0.001951 |
| 66_bl-2 | 66 | FGFR1  | MODERATE           | c.488G>T;<br>c.494G>T;<br>c.737G>T;<br>c.755G>T;<br>c.761G>T;<br>c.854G>T | p.Arg163Leu<br>;<br>p.Arg165Leu<br>;<br>p.Arg246Leu<br>;<br>p.Arg252Leu<br>;<br>p.Arg254Leu<br>;<br>p.Arg285Leu | 1  | FALSE | chr8:3828<br>2202:C:A  | 14:chr8:38<br>282202:C:<br>A  | 0.001665 |
| 66_bl-2 | 66 | RPL19  | MODERATE           | c.452G>A                                                                  | p.Arg151His                                                                                                     | 0  | FALSE | chr17:373<br>60425:G:A | 14:chr17:3<br>7360425:G:<br>A | 0.001206 |
| 66_bl-2 | 66 | RET    | MODERATE           | c.2038G>A                                                                 | p.Ala680Thr                                                                                                     | 1  | FALSE | chr10:436<br>10086:G:A | 14:chr10:4<br>3610086:G:<br>A | 0.000959 |
| 66_bl-2 | 66 | AKT3   | HIGH               | c.289G>T                                                                  | p.Glu97*                                                                                                        | 0  | FALSE | chr1:2438<br>09335:C:A | 14:chr1:24<br>3809335:C:<br>A | 0.001262 |
| 66_bl-2 | 66 | RET    | MODERATE           | c.1690A>C                                                                 | p.Thr564Pro                                                                                                     | 1  | FALSE | chr10:436<br>08342:A:C | 14:chr10:4<br>3608342:A:<br>C | 0.011146 |
| 66_bl-2 | 66 | GNA11  | MODERATE           | c.1030G>A                                                                 | p.Val344Met                                                                                                     | 1  | FALSE | chr19:312<br>1127:G:A  | 14:chr19:3<br>121127:G:<br>A  | 0.001149 |

|         |    |                             |                    |                                                                               |                                                             |       |       |                    |                       |          |
|---------|----|-----------------------------|--------------------|-------------------------------------------------------------------------------|-------------------------------------------------------------|-------|-------|--------------------|-----------------------|----------|
| 66_bl-2 | 66 | NF1                         | MODERATE           | c.2695T>G                                                                     | p.Leu899Val                                                 | 3     | FALSE | chr17:29556328:T:G | 14:chr17:29556328:T:G | 0.008636 |
| 66_bl-2 | 66 | BRAF                        | MODERATE           | c.1799T>A                                                                     | p.Val600Glu                                                 | 23024 | FALSE | chr7:140453136:A:T | 14:chr7:140453136:A:T | 0.332435 |
| 66_bl-2 | 66 | AKT3                        | MODERATE           | c.44G>T                                                                       | p.Arg15Met                                                  | 0     | FALSE | chr1:244006429:C:A | 14:chr1:244006429:C:A | 0.001328 |
| 66_bl-2 | 66 | NF1                         | MODERATE           | c.7367C>A;<br>c.7430C>A                                                       | p.Pro2456His;<br>p.Pro2477His                               | 1     | FALSE | chr17:29677309:C:A | 14:chr17:29677309:C:A | 0.001587 |
| 51_bl-1 | 51 | EGFR                        | MODERATE           | c.719G>A                                                                      | p.Cys240Tyr                                                 | 1     | FALSE | chr7:55220329:G:A  | 15:chr7:55220329:G:A  | 0.001436 |
| 51_bl-1 | 51 | TP53                        | MODERATE           | c.438G>T;<br>c.519G>T;<br>c.798G>T;<br>c.915G>T                               | p.Lys146Asn;<br>p.Lys173Asn;<br>p.Lys266Asn;<br>p.Lys305Asn | 3     | FALSE | chr17:7577023:C:A  | 15:chr17:7577023:C:A  | 0.001428 |
| 51_bl-1 | 51 | ERBB2;<br>MIEN1;<br>MIR4728 | MODERATE; MODIFIER | c.2720A>G;<br>c.2765A>G;<br>c.2810A>G;<br>n.3134A>G;<br>c.*388T>C;<br>n.-1A>G | p.Lys907Arg;<br>p.Lys922Arg;<br>p.Lys937Arg                 | 1     | FALSE | chr17:37882044:A:G | 15:chr17:37882044:A:G | 0.001756 |
| 51_bl-1 | 51 | KRAS                        | MODERATE           | c.35G>A                                                                       | p.Gly12Asp                                                  | 11213 | FALSE | chr12:25398284:C:T | 15:chr12:25398284:C:T | 0.015695 |
| 51_bl-1 | 51 | TP53                        | MODERATE           | c.353G>T;<br>c.434G>T;<br>c.713G>T;<br>c.830G>T                               | p.Cys118Phe;<br>p.Cys145Phe;<br>p.Cys238Phe;<br>p.Cys277Phe | 22    | FALSE | chr17:7577108:C:A  | 15:chr17:7577108:C:A  | 0.001635 |
| 51_bl-1 | 51 | EGFR;<br>EGFR-AS1           | MODERATE; MODIFIER | c.2410G>A;<br>n.1152C>T                                                       | p.Glu804Lys                                                 | 2     | FALSE | chr7:55249112:G:A  | 15:chr7:55249112:G:A  | 0.001346 |
| 51_bl-1 | 51 | TP53                        | MODERATE; MODIFIER | c.100G>T;<br>c.217G>T;<br>c.-279G>T;<br>c.-360G>T                             | p.Val34Leu;<br>p.Val73Leu;                                  | 5     | FALSE | chr17:7579470:C:A  | 15:chr17:7579470:C:A  | 0.001747 |
| 51_bl-1 | 51 | RET                         | MODERATE           | c.1867G>A                                                                     | p.Glu623Lys                                                 | 1     | FALSE | chr10:43609111:G:A | 15:chr10:43609111:G:A | 0.001077 |

|           |    |            |                    |                                                     |                                                                    |     |       |                        |                               |          |
|-----------|----|------------|--------------------|-----------------------------------------------------|--------------------------------------------------------------------|-----|-------|------------------------|-------------------------------|----------|
| 51_bl-1   | 51 | DDR2       | MODERATE           | c.1598C>A                                           | p.Thr533Lys                                                        | 1   | FALSE | chr1:1627<br>41907:C:A | 15:chr1:16<br>2741907:C<br>:A | 0.001508 |
| 51_bl-1   | 51 | PTEN       | MODERATE           | c.361G>A                                            | p.Ala121Thr                                                        | 3   | FALSE | chr10:896<br>92877:G:A | 15:chr10:8<br>9692877:G<br>:A | 0.002066 |
| 51_bl-1   | 51 | CTNNB1     | MODERATE           | c.884C>A                                            | p.Ala295Asp                                                        | 0   | FALSE | chr3:4126<br>7300:C:A  | 15:chr3:41<br>267300:C:<br>A  | 0.001855 |
| 51_bl-1   | 51 | TP53       | MODERATE           | c.265C>T;<br>c.346C>T;<br>c.625C>T;<br>c.742C>T     | p.Arg89Trp;<br>p.Arg116Trp<br>;<br>p.Arg209Trp<br>;<br>p.Arg248Trp | 559 | FALSE | chr17:757<br>7539:G:A  | 15:chr17:7<br>577539:G:<br>A  | 0.006677 |
| 51_bl-1   | 51 | EGFR       | MODERATE           | c.1159C>A                                           | p.Leu387Met                                                        | 1   | FALSE | chr7:5522<br>4477:C:A  | 15:chr7:55<br>224477:C:<br>A  | 0.001931 |
| 51_bl-1   | 51 | NF1        | MODERATE           | c.2695T>G                                           | p.Leu899Val                                                        | 3   | FALSE | chr17:295<br>56328:T:G | 15:chr17:2<br>9556328:T<br>:G | 0.011466 |
| 51_bl-1   | 51 | EGFR       | MODERATE           | c.3289G>A                                           | p.Val1097Ile                                                       | 1   | FALSE | chr7:5527<br>2966:G:A  | 15:chr7:55<br>272966:G:<br>A  | 0.001561 |
| 51_bl-1   | 51 | EVI2A; NF1 | MODIFIER; MODERATE | c.-266G>A;<br>c.-338G>A;<br>c.5020C>T;<br>c.5083C>T | p.Arg1674Tr<br>p;<br>p.Arg1695Tr<br>p                              | 1   | FALSE | chr17:296<br>53085:C:T | 15:chr17:2<br>9653085:C<br>:T | 0.001396 |
| 51_bl-1   | 51 | EGFR       | MODERATE           | c.940G>A                                            | p.Asp314Asn                                                        | 1   | FALSE | chr7:5522<br>3573:G:A  | 15:chr7:55<br>223573:G:<br>A  | 0.001296 |
| 51_bl-1   | 51 | MET        | MODERATE           | c.1640G>A                                           | p.Arg547Gln                                                        | 1   | FALSE | chr7:1163<br>81018:G:A | 15:chr7:11<br>6381018:G<br>:A | 0.001296 |
| 51_t2c1-1 | 51 | TP53       | MODIFIER; MODERATE | c.-3G>T;<br>c.358G>T;<br>c.475G>T;<br>c.79G>T       | p; p.Ala120Ser;<br>p.Ala159Ser;<br>p.Ala27Ser                      | 23  | FALSE | chr17:757<br>8455:C:A  | 16:chr17:7<br>578455:C:<br>A  | 0.002962 |
| 51_t2c1-1 | 51 | CTNNB1     | MODERATE           | c.884C>A                                            | p.Ala295Asp                                                        | 0   | FALSE | chr3:4126<br>7300:C:A  | 16:chr3:41<br>267300:C:<br>A  | 0.001647 |
| 51_t2c1-1 | 51 | KIT        | HIGH               | c.1698C>A<br>;<br>c.1710C>A                         | p.Tyr566*;<br>p.Tyr570*                                            | 2   | FALSE | chr4:5559<br>3644:C:A  | 16:chr4:55<br>593644:C:<br>A  | 0.001553 |
| 51_t2c1-1 | 51 | AKT3       | MODERATE           | c.197G>T                                            | p.Arg66Leu                                                         | 0   | FALSE | chr1:2438<br>28161:C:A | 16:chr1:24<br>3828161:C<br>:A | 0.001256 |
| 51_t2c1-1 | 51 | NF1        | MODERATE           | c.3559C>A                                           | p.Leu1187Ile                                                       | 1   | FALSE | chr17:295<br>60082:C:A | 16:chr17:2<br>9560082:C<br>:A | 0.001367 |



|           |    |                   |                    |                                                    |                                                                   |    |       |                        |                               |          |
|-----------|----|-------------------|--------------------|----------------------------------------------------|-------------------------------------------------------------------|----|-------|------------------------|-------------------------------|----------|
| 51_t2c1-1 | 51 | TP53              | MODERATE; MODIFIER | c.140C>T;<br>c.23C>T; c.-<br>279C>T; c.-<br>360C>T | p.Pro47Leu;<br>p.Pro8Leu;                                         | 2  | FALSE | chr17:757<br>9547:G:A  | 16:chr17:7<br>579547:G:<br>A  | 0.002237 |
| 51_t2c1-1 | 51 | DDR2              | MODERATE           | c.1963G>A                                          | p.Glu655Lys                                                       | 1  | FALSE | chr1:1627<br>45548:G:A | 16:chr1:16<br>2745548:G<br>:A | 0.001908 |
| 51_t2c1-1 | 51 | KIT               | MODERATE           | c.2825G>A<br>;<br>c.2837G>A                        | p.Arg942Gln<br>;<br>p.Arg946Gln                                   | 1  | FALSE | chr4:5560<br>4629:G:A  | 16:chr4:55<br>604629:G:<br>A  | 0.001421 |
| 51_t2c1-1 | 51 | RET               | MODERATE           | c.1531G>A                                          | p.Glu511Lys                                                       | 1  | FALSE | chr10:436<br>07555:G:A | 16:chr10:4<br>3607555:G<br>:A | 0.001198 |
| 51_t2c1-1 | 51 | BRAF              | MODERATE           | c.2285C>T                                          | p.Ala762Val                                                       | 2  | FALSE | chr7:1404<br>34413:G:A | 16:chr7:14<br>0434413:G<br>:A | 0.001068 |
| 51_t2c1-1 | 51 | NF1               | MODERATE           | c.6405C>A<br>;<br>c.6468C>A                        | p.Phe2135L<br>eu;<br>p.Phe2156L<br>eu                             | 1  | FALSE | chr17:296<br>64426:C:A | 16:chr17:2<br>9664426:C<br>:A | 0.002835 |
| 51_t2c1-1 | 51 | BRAF              | MODERATE           | c.2223G>T                                          | p.Glu741As<br>p                                                   | 1  | FALSE | chr7:1404<br>34475:C:A | 16:chr7:14<br>0434475:C<br>:A | 0.001224 |
| 51_t2c1-1 | 51 | PIK3CA            | HIGH               | c.241G>T                                           | p.Glu81*                                                          | 38 | FALSE | chr3:1789<br>16854:G:T | 16:chr3:17<br>8916854:G<br>:T | 0.001293 |
| 51_t2c1-1 | 51 | PTEN              | MODERATE           | c.442G>A                                           | p.Ala148Thr                                                       | 2  | FALSE | chr10:896<br>92958:G:A | 16:chr10:8<br>9692958:G<br>:A | 0.002865 |
| 51_t2c1-1 | 51 | DDR2              | MODERATE           | c.2516G>A                                          | p.Arg839His                                                       | 3  | FALSE | chr1:1627<br>49984:G:A | 16:chr1:16<br>2749984:G<br>:A | 0.0012   |
| 51_t2c1-1 | 51 | DDR2              | MODERATE           | c.313C>A                                           | p.Arg105Ser                                                       | 2  | FALSE | chr1:1627<br>24541:C:A | 16:chr1:16<br>2724541:C<br>:A | 0.001767 |
| 51_t2c1-1 | 51 | FGFR1             | MODIFIER; MODERATE | c.-63G>T;<br>c.129G>T;<br>c.30G>T                  | p.Trp43Cys;<br>p.Trp10Cys                                         | 1  | FALSE | chr8:3831<br>4935:C:A  | 16:chr8:38<br>314935:C:<br>A  | 0.001567 |
| 51_t2c1-1 | 51 | EGFR;<br>EGFR-AS1 | MODIFIER; MODERATE | c.*2364T><br>C;<br>c.2240T>C;<br>n.*2821A><br>G    | p.Leu747Ser                                                       | 13 | FALSE | chr7:5524<br>2470:T:C  | 16:chr7:55<br>242470:T:<br>C  | 0.001117 |
| 51_t2c1-1 | 51 | EGFR;<br>EGFR-AS1 | MODERATE; MODIFIER | c.2350T>C;<br>n.1212A>G                            | p.Ser784Pro<br>;                                                  | 4  | FALSE | chr7:5524<br>9052:T:C  | 16:chr7:55<br>249052:T:<br>C  | 0.001225 |
| 51_t2c1-1 | 51 | TP53              | MODERATE           | c.126G>T;<br>c.207G>T;<br>c.486G>T;<br>c.603G>T    | p.Leu42Phe;<br>p.Leu69Phe;<br>p.Leu162Ph<br>e;<br>p.Leu201Ph<br>e | 4  | FALSE | chr17:757<br>8246:C:A  | 16:chr17:7<br>578246:C:<br>A  | 0.001577 |

|           |    |        |                    |                                                 |                                                                    |     |       |                        |                               |          |
|-----------|----|--------|--------------------|-------------------------------------------------|--------------------------------------------------------------------|-----|-------|------------------------|-------------------------------|----------|
| 51_t2c1-1 | 51 | RET    | MODERATE           | c.1349G>A                                       | p.Ser450Asn                                                        | 1   | FALSE | chr10:436<br>06740:G:A | 16:chr10:4<br>3606740:G<br>:A | 0.001127 |
| 51_t2c1-1 | 51 | CTNNB1 | MODERATE           | c.1456C>T                                       | p.Arg486Cys                                                        | 0   | FALSE | chr3:4127<br>5290:C:T  | 16:chr3:41<br>275290:C:<br>T  | 0.001253 |
| 51_t2c1-1 | 51 | MET    | HIGH               | c.1249C>T                                       | p.Arg417*                                                          | 1   | FALSE | chr7:1163<br>71770:C:T | 16:chr7:11<br>6371770:C<br>:T | 0.000976 |
| 51_t2c1-1 | 51 | TP53   | MODERATE           | c.265C>T;<br>c.346C>T;<br>c.625C>T;<br>c.742C>T | p.Arg89Trp;<br>p.Arg116Trp<br>;<br>p.Arg209Trp<br>;<br>p.Arg248Trp | 559 | FALSE | chr17:757<br>7539:G:A  | 16:chr17:7<br>577539:G:<br>A  | 0.339193 |
| 51_t2c1-1 | 51 | CTNNB1 | MODERATE           | c.125C>A                                        | p.Thr42Lys                                                         | 0   | FALSE | chr3:4126<br>6128:C:A  | 16:chr3:41<br>266128:C:<br>A  | 0.00219  |
| 51_t2c1-1 | 51 | DDR2   | MODERATE           | c.1598C>A                                       | p.Thr533Lys                                                        | 1   | FALSE | chr1:1627<br>41907:C:A | 16:chr1:16<br>2741907:C<br>:A | 0.001505 |
| 51_t2c1-1 | 51 | NF1    | MODERATE           | c.5494A>G<br>;<br>c.5557A>G                     | p.Thr1832Al<br>a;<br>p.Thr1853Al<br>a                              | 1   | FALSE | chr17:296<br>54805:A:G | 16:chr17:2<br>9654805:A<br>:G | 0.001367 |
| 51_t2c1-1 | 51 | PIK3CA | MODERATE           | c.3044C>A                                       | p.Ser1015Ty<br>r                                                   | 3   | FALSE | chr3:1789<br>51989:C:A | 16:chr3:17<br>8951989:C<br>:A | 0.001157 |
| 51_t2c1-1 | 51 | CTNNB1 | MODERATE           | c.419T>C                                        | p.Ile140Thr                                                        | 0   | FALSE | chr3:4126<br>6622:T:C  | 16:chr3:41<br>266622:T:<br>C  | 0.001258 |
| 51_t2c1-1 | 51 | EPHA3  | MODERATE           | c.1132C>A                                       | p.Pro378Thr                                                        | 0   | FALSE | chr3:8939<br>1066:C:A  | 16:chr3:89<br>391066:C:<br>A  | 0.001289 |
| 51_t2c1-1 | 51 | FGFR1  | MODIFIER; MODERATE | c.-85G>T;<br>c.107G>T;<br>c.8G>T                | p.Ser36Ile;<br>p.Ser3Ile                                           | 1   | FALSE | chr8:3831<br>4957:C:A  | 16:chr8:38<br>314957:C:<br>A  | 0.002494 |
| 51_t2c1-1 | 51 | EPHA3  | MODERATE           | c.497C>A                                        | p.Thr166Asn                                                        | 0   | FALSE | chr3:8925<br>9353:C:A  | 16:chr3:89<br>259353:C:<br>A  | 0.001255 |
| 51_t2c1-1 | 51 | ROS1   | MODERATE           | c.5651G>T                                       | p.Arg1884Il<br>e                                                   | 1   | FALSE | chr6:1176<br>42548:C:A | 16:chr6:11<br>7642548:C<br>:A | 0.001561 |
| 51_t2c1-1 | 51 | TP53   | MODIFIER; MODERATE | c.-5G>T;<br>c.356G>T;<br>c.473G>T;<br>c.77G>T   | p.Arg119Leu<br>;<br>p.Arg158Leu<br>;<br>p.Arg26Leu                 | 80  | FALSE | chr17:757<br>8457:C:A  | 16:chr17:7<br>578457:C:<br>A  | 0.002033 |

|           |    |       |                    |                                                                                               |                                                                         |       |       |                        |                               |          |
|-----------|----|-------|--------------------|-----------------------------------------------------------------------------------------------|-------------------------------------------------------------------------|-------|-------|------------------------|-------------------------------|----------|
| 51_t2c1-1 | 51 | TP53  | MODIFIER; HIGH     | c.*143G>T;<br>; c.*55G>T;<br>c.1036G>T<br>;<br>c.559G>T;<br>c.640G>T;<br>c.919G>T             | ; p.Glu346*;<br>p.Glu187*;<br>p.Glu214*;<br>p.Glu307*                   | 4     | FALSE | chr17:757<br>3991:C:A  | 16:chr17:7<br>573991:C:<br>A  | 0.002534 |
| 51_t2c1-1 | 51 | ALK   | MODERATE           | c.874C>T                                                                                      | p.Arg292Cys                                                             | 1     | FALSE | chr2:2991<br>7794:G:A  | 16:chr2:29<br>917794:G:<br>A  | 0.00127  |
| 51_t2c1-1 | 51 | NF1   | MODERATE           | c.2695T>G                                                                                     | p.Leu899Val                                                             | 3     | FALSE | chr17:295<br>56328:T:G | 16:chr17:2<br>9556328:T<br>:G | 0.017995 |
| 51_t2c1-1 | 51 | HGF   | MODERATE           | c.5G>T                                                                                        | p.Trp2Leu                                                               | 0     | FALSE | chr7:8139<br>9283:C:A  | 16:chr7:81<br>399283:C:<br>A  | 0.001383 |
| 51_t2c1-1 | 51 | KRAS  | MODERATE           | c.35G>A                                                                                       | p.Gly12Asp                                                              | 11213 | FALSE | chr12:253<br>98284:C:T | 16:chr12:2<br>5398284:C<br>:T | 0.403834 |
| 51_t2c1-1 | 51 | TP53  | HIGH; MODIFIER     | c.166G>T;<br>c.49G>T; c.<br>279G>T; c.-<br>360G>T                                             | p.Glu56*;<br>p.Glu17*;                                                  | 6     | FALSE | chr17:757<br>9521:C:A  | 16:chr17:7<br>579521:C:<br>A  | 0.002326 |
| 51_t2c1-1 | 51 | TP53  | MODIFIER; MODERATE | c.*137A>G<br>;<br>c.*225A>G<br>;<br>c.1001A>G<br>;<br>c.1118A>G<br>;<br>c.641A>G;<br>c.722A>G | p.Lys334Arg<br>;<br>p.Lys373Arg<br>;<br>p.Lys214Arg<br>;<br>p.Lys241Arg | 1     | FALSE | chr17:757<br>2991:T:C  | 16:chr17:7<br>572991:T:<br>C  | 0.01072  |
| 51_t2c1-1 | 51 | EGFR  | MODERATE           | c.940G>A                                                                                      | p.Asp314As<br>n                                                         | 1     | FALSE | chr7:5522<br>3573:G:A  | 16:chr7:55<br>223573:G:<br>A  | 0.001194 |
| 51_t2c1-1 | 51 | GNA11 | MODERATE           | c.805G>A                                                                                      | p.Val269Ile                                                             | 1     | FALSE | chr19:311<br>9273:G:A  | 16:chr19:3<br>119273:G:<br>A  | 0.001603 |
| 51_t2c1-1 | 51 | RET   | MODERATE           | c.1690A>C                                                                                     | p.Thr564Pro                                                             | 1     | FALSE | chr10:436<br>08342:A:C | 16:chr10:4<br>3608342:A<br>:C | 0.006527 |
| 51_t2c1-1 | 51 | EGFR  | MODERATE           | c.866C>A                                                                                      | p.Ala289Asp                                                             | 34    | FALSE | chr7:5522<br>1822:C:A  | 16:chr7:55<br>221822:C:<br>A  | 0.00155  |
| 51_t2c1-1 | 51 | NF1   | MODERATE           | c.3748C>T                                                                                     | p.Arg1250Tr<br>p                                                        | 1     | FALSE | chr17:295<br>62668:C:T | 16:chr17:2<br>9562668:C<br>:T | 0.001214 |

|         |    |      |                    |                                                                                               |                                                                         |       |       |                        |                               |          |
|---------|----|------|--------------------|-----------------------------------------------------------------------------------------------|-------------------------------------------------------------------------|-------|-------|------------------------|-------------------------------|----------|
| 51_c2-1 | 51 | TP53 | MODERATE           | c.265C>T;<br>c.346C>T;<br>c.625C>T;<br>c.742C>T                                               | p.Arg89Trp;<br>p.Arg116Trp<br>;<br>p.Arg209Trp<br>;<br>p.Arg248Trp      | 559   | FALSE | chr17:757<br>7539:G:A  | 17:chr17:7<br>577539:G:<br>A  | 0.132686 |
| 51_c2-1 | 51 | TP53 | MODERATE; MODIFIER | c.145G>A;<br>c.28G>A; c.<br>279G>A; c.<br>360G>A                                              | p.Asp49Asn;<br>p.Asp10Asn;                                              | 4     | FALSE | chr17:757<br>9542:C:T  | 17:chr17:7<br>579542:C:<br>T  | 0.006897 |
| 51_c2-1 | 51 | PTEN | MODERATE           | c.829A>T                                                                                      | p.Thr277Ser                                                             | 1     | FALSE | chr10:897<br>20678:A:T | 17:chr10:8<br>9720678:A<br>:T | 0.007874 |
| 51_c2-1 | 51 | KRAS | MODERATE           | c.35G>A                                                                                       | p.Gly12Asp                                                              | 11213 | FALSE | chr12:253<br>98284:C:T | 17:chr12:2<br>5398284:C<br>:T | 0.180288 |
| 51_c3-1 | 51 | PTEN | MODERATE           | c.443C>A                                                                                      | p.Ala148Glu                                                             | 1     | FALSE | chr10:896<br>92959:C:A | 18:chr10:8<br>9692959:C<br>:A | 0.003371 |
| 51_c3-1 | 51 | RET  | MODERATE           | c.1900T>G                                                                                     | p.Cys634Gly                                                             | 13    | FALSE | chr10:436<br>09948:T:G | 18:chr10:4<br>3609948:T<br>:G | 0.001813 |
| 51_c3-1 | 51 | TP53 | MODERATE           | c.248G>T;<br>c.329G>T;<br>c.608G>T;<br>c.725G>T                                               | p.Cys83Phe;<br>p.Cys110Ph<br>e;<br>p.Cys203Ph<br>e;<br>p.Cys242Ph<br>e  | 72    | FALSE | chr17:757<br>7556:C:A  | 18:chr17:7<br>577556:C:<br>A  | 0.001862 |
| 51_c3-1 | 51 | NF1  | MODERATE           | c.2695T>G                                                                                     | p.Leu899Val                                                             | 3     | FALSE | chr17:295<br>56328:T:G | 18:chr17:2<br>9556328:T<br>:G | 0.015625 |
| 51_c3-1 | 51 | TP53 | MODIFIER; MODERATE | c.*137A>G<br>;<br>c.*225A>G<br>;<br>c.1001A>G<br>;<br>c.1118A>G<br>;<br>c.641A>G;<br>c.722A>G | p.Lys334Arg<br>;<br>p.Lys373Arg<br>;<br>p.Lys214Arg<br>;<br>p.Lys241Arg | 1     | FALSE | chr17:757<br>2991:T:C  | 18:chr17:7<br>572991:T:<br>C  | 0.005579 |
| 51_c3-1 | 51 | TP53 | MODERATE           | c.265C>T;<br>c.346C>T;<br>c.625C>T;<br>c.742C>T                                               | p.Arg89Trp;<br>p.Arg116Trp<br>;<br>p.Arg209Trp<br>;<br>p.Arg248Trp      | 559   | FALSE | chr17:757<br>7539:G:A  | 18:chr17:7<br>577539:G:<br>A  | 0.107317 |

|         |    |        |                    |                                                                |                                                                         |       |       |                        |                               |          |
|---------|----|--------|--------------------|----------------------------------------------------------------|-------------------------------------------------------------------------|-------|-------|------------------------|-------------------------------|----------|
| 51_c3-1 | 51 | PIK3R1 | MODERATE           | c.1096G>A<br>;<br>c.1186G>A<br>;<br>c.1996G>A<br>;<br>c.907G>A | p.Glu366Lys<br>;<br>p.Glu396Lys<br>;<br>p.Glu666Lys<br>;<br>p.Glu303Lys | 2     | FALSE | chr5:6759<br>3250:G:A  | 18:chr5:67<br>593250:G:<br>A  | 0.001671 |
| 51_c3-1 | 51 | TP53   | MODIFIER; LOW      | c.-100C>T;<br>c.-19C>T;<br>c.261C>T;<br>c.378C>T               | p.Tyr87Tyr;<br>p.Tyr126Tyr                                              | 5     | FALSE | chr17:757<br>8552:G:A  | 18:chr17:7<br>578552:G:<br>A  | 0.001781 |
| 51_c3-1 | 51 | FGFR1  | MODIFIER; MODERATE | c.-85G>T;<br>c.107G>T;<br>c.8G>T                               | p.Ser36Ile;<br>p.Ser3Ile                                                | 1     | FALSE | chr8:3831<br>4957:C:A  | 18:chr8:38<br>314957:C:<br>A  | 0.001704 |
| 51_c3-1 | 51 | DDR2   | MODERATE           | c.1418G>A                                                      | p.Arg473His                                                             | 2     | FALSE | chr1:1627<br>40216:G:A | 18:chr1:16<br>2740216:G<br>:A | 0.002138 |
| 51_c3-1 | 51 | TP53   | MODERATE           | c.298G>T;<br>c.379G>T;<br>c.658G>T;<br>c.775G>T                | p.Asp100Tyr<br>;<br>p.Asp127Tyr<br>;<br>p.Asp220Tyr<br>;<br>p.Asp259Tyr | 23    | FALSE | chr17:757<br>7506:C:A  | 18:chr17:7<br>577506:C:<br>A  | 0.002083 |
| 51_c3-1 | 51 | CWH43  | MODERATE           | c.415G>A;<br>c.496G>A                                          | p.Asp139As<br>n;<br>p.Asp166As<br>n                                     | 0     | FALSE | chr4:4899<br>4092:G:A  | 18:chr4:48<br>994092:G:<br>A  | 0.002079 |
| 51_c3-1 | 51 | KRAS   | MODERATE           | c.35G>A                                                        | p.Gly12Asp                                                              | 11213 | FALSE | chr12:253<br>98284:C:T | 18:chr12:2<br>5398284:C<br>:T | 0.191297 |
| 51_c3-1 | 51 | TP53   | MODERATE; MODIFIER | c.115G>T;<br>c.232G>T;<br>c.-279G>T;<br>c.-360G>T              | p.Ala39Ser;<br>p.Ala78Ser;                                              | 1     | FALSE | chr17:757<br>9455:C:A  | 18:chr17:7<br>579455:C:<br>A  | 0.004444 |
| 51_c3-1 | 51 | DDR2   | MODERATE           | c.313C>A                                                       | p.Arg105Ser                                                             | 2     | FALSE | chr1:1627<br>24541:C:A | 18:chr1:16<br>2724541:C<br>:A | 0.001317 |
| 51_c3-1 | 51 | RET    | MODERATE           | c.1838C>T                                                      | p.Pro613Leu                                                             | 1     | FALSE | chr10:436<br>09082:C:T | 18:chr10:4<br>3609082:C<br>:T | 0.001509 |
| 51_c3-1 | 51 | PIK3R1 | MODERATE           | c.514G>A                                                       | p.Val172Met                                                             | 1     | FALSE | chr5:6757<br>5441:G:A  | 18:chr5:67<br>575441:G:<br>A  | 0.001892 |

|         |    |                            |                    |                                                                                                                      |                                                    |     |       |                        |                               |          |
|---------|----|----------------------------|--------------------|----------------------------------------------------------------------------------------------------------------------|----------------------------------------------------|-----|-------|------------------------|-------------------------------|----------|
| 51_c3-1 | 51 | GAPDH;<br>IFFO1;<br>NCAPD2 | MODERATE; MODIFIER | c.113G>C;<br>c.239G>C;<br>c.*1743C><br>G;<br>c.*1746C><br>G;<br>c.*1770C><br>G;<br>n.*2798C><br>G;<br>c.*4252G><br>C | p.Arg38Pro;<br>p.Arg80Pro;                         | 0   | FALSE | chr12:664<br>6088:G:C  | 18:chr12:6<br>646088:G:<br>C  | 0.002389 |
| 51_c3-1 | 51 | PIK3CA                     | MODERATE           | c.478C>A                                                                                                             | p.His160Asn                                        | 1   | FALSE | chr3:1789<br>17603:C:A | 18:chr3:17<br>8917603:C<br>:A | 0.001563 |
| 51_c3-1 | 51 | RET                        | MODERATE           | c.1690A>C                                                                                                            | p.Thr564Pro                                        | 1   | FALSE | chr10:436<br>08342:A:C | 18:chr10:4<br>3608342:A<br>:C | 0.007736 |
| 51_c3-1 | 51 | CTNNB1                     | HIGH               | c.283C>T                                                                                                             | p.Arg95*                                           | 0   | FALSE | chr3:4126<br>6486:C:T  | 18:chr3:41<br>266486:C:<br>T  | 0.001433 |
| 51_c3-1 | 51 | CTNNB1                     | MODERATE           | c.67A>G                                                                                                              | p.Ser23Gly                                         | 0   | FALSE | chr3:4126<br>6070:A:G  | 18:chr3:41<br>266070:A:<br>G  | 0.001676 |
| 51_c3-1 | 51 | TP53                       | MODIFIER; MODERATE | c.-9G>T;<br>c.352G>T;<br>c.469G>T;<br>c.73G>T                                                                        | p.Val118Phe<br>;<br>p.Val157Phe<br>;<br>p.Val25Phe | 169 | FALSE | chr17:757<br>8461:C:A  | 18:chr17:7<br>578461:C:<br>A  | 0.002822 |
| 51_c3-1 | 51 | HGF                        | MODERATE           | c.5G>T                                                                                                               | p.Trp2Leu                                          | 0   | FALSE | chr7:8139<br>9283:C:A  | 18:chr7:81<br>399283:C:<br>A  | 0.001552 |
| 51_c4-1 | 51 | RPL19                      | MODERATE           | c.452G>A                                                                                                             | p.Arg151His                                        | 0   | FALSE | chr17:373<br>60425:G:A | 19:chr17:3<br>7360425:G<br>:A | 0.001754 |
| 51_c4-1 | 51 | RET                        | MODERATE           | c.1385C>T                                                                                                            | p.Ser462Leu                                        | 1   | FALSE | chr10:436<br>06776:C:T | 19:chr10:4<br>3606776:C<br>:T | 0.00122  |
| 51_c4-1 | 51 | BRAF                       | MODERATE           | c.1394C>T                                                                                                            | p.Ser465Phe                                        | 1   | FALSE | chr7:1404<br>81414:G:A | 19:chr7:14<br>0481414:G<br>:A | 0.001291 |
| 51_c4-1 | 51 | EGFR                       | MODIFIER; MODERATE | c.*2133G><br>A;<br>c.*2364G><br>A;<br>c.2030G>A                                                                      | p.Arg677His                                        | 5   | FALSE | chr7:5524<br>0786:G:A  | 19:chr7:55<br>240786:G:<br>A  | 0.003783 |
| 51_c4-1 | 51 | DDR2                       | MODERATE           | c.1195C>T                                                                                                            | p.Arg399Trp                                        | 1   | FALSE | chr1:1627<br>37051:C:T | 19:chr1:16<br>2737051:C<br>:T | 0.001252 |
| 51_c4-1 | 51 | DDR2                       | MODERATE           | c.1418G>A                                                                                                            | p.Arg473His                                        | 2   | FALSE | chr1:1627<br>40216:G:A | 19:chr1:16<br>2740216:G<br>:A | 0.001322 |
| 51_c4-1 | 51 | DDR2                       | MODERATE           | c.313C>A                                                                                                             | p.Arg105Ser                                        | 2   | FALSE | chr1:1627<br>24541:C:A | 19:chr1:16<br>2724541:C<br>:A | 0.001264 |

|         |    |        |                    |                                                                               |                                                             |    |       |                    |                       |          |
|---------|----|--------|--------------------|-------------------------------------------------------------------------------|-------------------------------------------------------------|----|-------|--------------------|-----------------------|----------|
| 51_c4-1 | 51 | NF1    | MODERATE           | c.2695T>G                                                                     | p.Leu899Val                                                 | 3  | FALSE | chr17:29556328:T:G | 19:chr17:29556328:T:G | 0.009155 |
| 51_c4-1 | 51 | EPHA3  | MODERATE           | c.1132C>A                                                                     | p.Pro378Thr                                                 | 0  | FALSE | chr3:89391066:C:A  | 19:chr3:89391066:C:A  | 0.001309 |
| 51_c4-1 | 51 | BRAF   | MODERATE           | c.2285C>A                                                                     | p.Ala762Glu                                                 | 2  | FALSE | chr7:140434413:G:T | 19:chr7:140434413:G:T | 0.001133 |
| 51_c4-1 | 51 | RET    | MODERATE           | c.1574G>A                                                                     | p.Arg525Gln                                                 | 1  | FALSE | chr10:43607598:G:A | 19:chr10:43607598:G:A | 0.001281 |
| 51_c4-1 | 51 | PHLPP1 | MODERATE           | c.2303C>A                                                                     | p.Ser768Tyr                                                 | 0  | FALSE | chr18:60563103:C:A | 19:chr18:60563103:C:A | 0.00188  |
| 51_c4-1 | 51 | EGFR   | MODERATE           | c.755G>A                                                                      | p.Arg252His                                                 | 3  | FALSE | chr7:55221711:G:A  | 19:chr7:55221711:G:A  | 0.002185 |
| 51_c4-1 | 51 | PTEN   | MODERATE           | c.443C>A                                                                      | p.Ala148Glu                                                 | 1  | FALSE | chr10:89692959:C:A | 19:chr10:89692959:C:A | 0.002667 |
| 51_c4-1 | 51 | TP53   | MODIFIER; MODERATE | c.-5G>T;<br>c.356G>T;<br>c.473G>T;<br>c.77G>T                                 | p.Arg119Leu;<br>p.Arg158Leu;<br>p.Arg26Leu                  | 80 | FALSE | chr17:7578457:C:A  | 19:chr17:7578457:C:A  | 0.002358 |
| 51_c4-1 | 51 | MET    | MODERATE           | c.3217C>T;<br>c.3271C>T                                                       | p.Pro1073Ser;<br>p.Pro1091Ser                               | 1  | FALSE | chr7:116415123:C:T | 19:chr7:116415123:C:T | 0.001425 |
| 51_c4-1 | 51 | KIT    | MODERATE           | c.1485C>A                                                                     | p.Asn495Lys                                                 | 1  | FALSE | chr4:55592161:C:A  | 19:chr4:55592161:C:A  | 0.001699 |
| 51_c4-1 | 51 | PIK3CA | MODERATE           | c.1412C>T                                                                     | p.Pro471Leu                                                 | 4  | FALSE | chr3:178928226:C:T | 19:chr3:178928226:C:T | 0.001498 |
| 51_c4-1 | 51 | PTEN   | MODERATE           | c.133G>A                                                                      | p.Val45Ile                                                  | 1  | FALSE | chr10:89653835:G:A | 19:chr10:89653835:G:A | 0.002445 |
| 51_c4-1 | 51 | TP53   | MODIFIER; MODERATE | c.*137A>G;<br>c.*225A>G;<br>c.1001A>G;<br>c.1118A>G;<br>c.641A>G;<br>c.722A>G | p.Lys334Arg;<br>p.Lys373Arg;<br>p.Lys214Arg;<br>p.Lys241Arg | 1  | FALSE | chr17:7572991:T:C  | 19:chr17:7572991:T:C  | 0.00436  |
| 51_c4-1 | 51 | PIK3R1 | MODERATE           | c.1096G>A;<br>c.1186G>A;<br>c.1996G>A;<br>c.907G>A                            | p.Glu366Lys;<br>p.Glu396Lys;<br>p.Glu666Lys;<br>p.Glu303Lys | 2  | FALSE | chr5:67593250:G:A  | 19:chr5:67593250:G:A  | 0.001549 |

|         |    |        |                    |                                                      |                                                                    |       |       |                        |                               |          |
|---------|----|--------|--------------------|------------------------------------------------------|--------------------------------------------------------------------|-------|-------|------------------------|-------------------------------|----------|
| 51_c4-1 | 51 | DDR2   | MODERATE           | c.691C>A                                             | p.Gln231Lys                                                        | 1     | FALSE | chr1:1627<br>29605:C:A | 19:chr1:16<br>2729605:C<br>:A | 0.001471 |
| 51_c4-1 | 51 | PIK3CA | MODERATE           | c.1070G>A                                            | p.Arg357Gln                                                        | 2     | FALSE | chr3:1789<br>22301:G:A | 19:chr3:17<br>8922301:G<br>:A | 0.001665 |
| 51_c4-1 | 51 | ERBB2  | MODERATE; MODIFIER | c.1594C>T;<br>c.1639C>T;<br>c.1684C>T;<br>n.2008C>T  | p.Pro532Ser<br>;<br>p.Pro547Ser<br>;<br>p.Pro562Ser<br>;           | 1     | FALSE | chr17:378<br>72805:C:T | 19:chr17:3<br>7872805:C<br>:T | 0.001305 |
| 51_c4-1 | 51 | EGFR   | MODERATE           | c.1168C>A                                            | p.Gln390Lys                                                        | 1     | FALSE | chr7:5522<br>4486:C:A  | 19:chr7:55<br>224486:C:<br>A  | 0.001295 |
| 51_c4-1 | 51 | HGF    | HIGH               | c.1993G>T<br>;<br>c.2008G>T                          | p.Glu665*;<br>p.Glu670*                                            | 0     | FALSE | chr7:8133<br>4708:C:A  | 19:chr7:81<br>334708:C:<br>A  | 0.002125 |
| 51_c4-1 | 51 | CTNNB1 | MODERATE           | c.91C>A                                              | p.Leu31Met                                                         | 0     | FALSE | chr3:4126<br>6094:C:A  | 19:chr3:41<br>266094:C:<br>A  | 0.002264 |
| 51_c4-1 | 51 | PIK3CA | MODERATE           | c.2594G>A                                            | p.Gly865Asp                                                        | 1     | FALSE | chr3:1789<br>47158:G:A | 19:chr3:17<br>8947158:G<br>:A | 0.001391 |
| 51_c4-1 | 51 | KRAS   | MODERATE           | c.35G>A                                              | p.Gly12Asp                                                         | 11213 | FALSE | chr12:253<br>98284:C:T | 19:chr12:2<br>5398284:C<br>:T | 0.342124 |
| 51_c4-1 | 51 | CTNNB1 | HIGH               | c.999C>A                                             | p.Tyr333*                                                          | 0     | FALSE | chr3:4126<br>8761:C:A  | 19:chr3:41<br>268761:C:<br>A  | 0.001311 |
| 51_c4-1 | 51 | RET    | MODERATE           | c.1690A>C                                            | p.Thr564Pro                                                        | 1     | FALSE | chr10:436<br>08342:A:C | 19:chr10:4<br>3608342:A<br>:C | 0.004892 |
| 51_c4-1 | 51 | TP53   | MODERATE           | c.265C>T;<br>c.346C>T;<br>c.625C>T;<br>c.742C>T      | p.Arg89Trp;<br>p.Arg116Trp<br>;<br>p.Arg209Trp<br>;<br>p.Arg248Trp | 559   | FALSE | chr17:757<br>7539:G:A  | 19:chr17:7<br>577539:G:<br>A  | 0.260179 |
| 51_c4-1 | 51 | AKT3   | MODERATE           | c.825G>T                                             | p.Glu275Asp                                                        | 0     | FALSE | chr1:2437<br>27145:C:A | 19:chr1:24<br>3727145:C<br>:A | 0.001726 |
| 51_c4-1 | 51 | HGF    | MODERATE           | c.490G>T;<br>c.505G>T                                | p.Gly164Cys<br>;<br>p.Gly169Cys                                    | 0     | FALSE | chr7:8138<br>1556:C:A  | 19:chr7:81<br>381556:C:<br>A  | 0.001541 |
| 51_c4-1 | 51 | PIK3R1 | HIGH               | c.1224C>A<br>;<br>c.135C>A;<br>c.324C>A;<br>c.414C>A | p.Tyr408*;<br>p.Tyr45*;<br>p.Tyr108*;<br>p.Tyr138*                 | 1     | FALSE | chr5:6758<br>9236:C:A  | 19:chr5:67<br>589236:C:<br>A  | 0.001452 |
| 51_c4-1 | 51 | CTNNB1 | LOW                | c.1956G>A                                            | p.Ala652Ala                                                        | 0     | FALSE | chr3:4127<br>8080:G:A  | 19:chr3:41<br>278080:G:<br>A  | 0.001457 |



|           |    |        |                    |                                          |                                                    |    |       |                    |                       |          |
|-----------|----|--------|--------------------|------------------------------------------|----------------------------------------------------|----|-------|--------------------|-----------------------|----------|
| 25_c1-1   | 25 | TP53   | MODIFIER; MODERATE | c.-2A>G; c.-83A>G; c.278A>G; c.395A>G    | p.Lys93Arg; p.Lys132Arg                            | 42 | FALSE | chr17:7578535:T:C  | 20:chr17:7578535:T:C  | 0.003339 |
| 25_c1-1   | 25 | TP53   | MODERATE           | c.355C>T; c.436C>T; c.715C>T; c.832C>T   | p.Pro119Ser; p.Pro146Ser; p.Pro239Ser; p.Pro278Ser | 59 | FALSE | chr17:7577106:G:A  | 20:chr17:7577106:G:A  | 0.008214 |
| 25_t2c2-2 | 25 | PTEN   | MODERATE           | c.402G>A                                 | p.Met134Ile                                        | 2  | FALSE | chr10:89692918:G:A | 21:chr10:89692918:G:A | 0.001901 |
| 25_t2c2-2 | 25 | EGFR   | MODERATE           | c.865G>A                                 | p.Ala289Thr                                        | 10 | FALSE | chr7:55221821:G:A  | 21:chr7:55221821:G:A  | 0.002028 |
| 25_t2c2-2 | 25 | TP53   | MODERATE; MODIFIER | c.115G>T; c.232G>T; c.-279G>T; c.-360G>T | p.Ala39Ser; p.Ala78Ser;                            | 1  | FALSE | chr17:7579455:C:A  | 21:chr17:7579455:C:A  | 0.002478 |
| 25_t2c2-2 | 25 | NF1    | MODERATE           | c.6166G>A; c.6229G>A                     | p.Asp2056Asn; p.Asp2077Asn                         | 1  | FALSE | chr17:29663734:G:A | 21:chr17:29663734:G:A | 0.001894 |
| 25_t2c2-2 | 25 | PTEN   | MODERATE           | c.389G>A                                 | p.Arg130Gln                                        | 89 | FALSE | chr10:89692905:G:A | 21:chr10:89692905:G:A | 0.001927 |
| 25_t2c2-2 | 25 | CTNNB1 | MODERATE           | c.86C>A                                  | p.Ser29Tyr                                         | 0  | FALSE | chr3:41266089:C:A  | 21:chr3:41266089:C:A  | 0.001903 |
| 25_t2c2-2 | 25 | TP53   | MODIFIER; MODERATE | c.-3G>T; c.358G>T; c.475G>T; c.79G>T     | p.Ala120Ser; p.Ala159Ser; p.Ala27Ser               | 23 | FALSE | chr17:7578455:C:A  | 21:chr17:7578455:C:A  | 0.002137 |
| 25_t2c2-2 | 25 | PTEN   | HIGH               | c.720C>A                                 | p.Tyr240*                                          | 3  | FALSE | chr10:89717695:C:A | 21:chr10:89717695:C:A | 0.003195 |
| 25_t2c2-2 | 25 | DDR2   | MODERATE           | c.313C>A                                 | p.Arg105Ser                                        | 2  | FALSE | chr1:162724541:C:A | 21:chr1:162724541:C:A | 0.00186  |
| 25_t2c2-2 | 25 | CTNNB1 | MODERATE           | c.884C>A                                 | p.Ala295Asp                                        | 0  | FALSE | chr3:41267300:C:A  | 21:chr3:41267300:C:A  | 0.003839 |
| 25_t2c2-2 | 25 | TP53   | MODERATE           | c.353G>T; c.434G>T; c.713G>T; c.830G>T   | p.Cys118Phe; p.Cys145Phe; p.Cys238Phe; p.Cys277Phe | 22 | FALSE | chr17:7577108:C:A  | 21:chr17:7577108:C:A  | 0.003268 |

|           |    |                |                            |                                                                                                   |                                                          |     |       |                        |                           |          |
|-----------|----|----------------|----------------------------|---------------------------------------------------------------------------------------------------|----------------------------------------------------------|-----|-------|------------------------|---------------------------|----------|
| 25_t2c2-2 | 25 | TP53           | LOW; MODIFIER;<br>MODERATE | c.-51G>A;<br>c.310G>A;<br>c.31G>A;<br>c.427G>A                                                    | ; p.Val104Met;<br>p.Val11Met;<br>p.Val143Met             | 24  | FALSE | chr17:757<br>8503:C:T  | 21:chr17:7<br>578503:C:T  | 0.001936 |
| 25_t2c2-2 | 25 | HGF            | MODERATE                   | c.1612G>T;<br>c.1627G>T                                                                           | p.Asp538Tyr;<br>p.Asp543Tyr                              | 0   | FALSE | chr7:8133<br>5733:C:A  | 21:chr7:81<br>335733:C:A  | 0.002077 |
| 25_t2c2-2 | 25 | KIT            | MODERATE                   | c.106C>A                                                                                          | p.Pro36Thr                                               | 1   | FALSE | chr4:5556<br>1716:C:A  | 21:chr4:55<br>561716:C:A  | 0.001808 |
| 25_t2c2-2 | 25 | EGFR           | MODERATE                   | c.3287C>T                                                                                         | p.Ser1096Phe                                             | 1   | FALSE | chr7:5527<br>2964:C:T  | 21:chr7:55<br>272964:C:T  | 0.002151 |
| 25_t2c2-2 | 25 | RET            | MODERATE                   | c.1690A>C                                                                                         | p.Thr564Pro                                              | 1   | FALSE | chr10:436<br>08342:A:C | 21:chr10:4<br>3608342:A:C | 0.009018 |
| 25_t2c2-2 | 25 | KIT            | MODERATE                   | c.391G>A                                                                                          | p.Asp131Asn                                              | 1   | FALSE | chr4:5556<br>4503:G:A  | 21:chr4:55<br>564503:G:A  | 0.001898 |
| 26_c3-b   | 26 | EGFR           | MODERATE                   | c.738C>A                                                                                          | p.Ser246Arg                                              | 2   | FALSE | chr7:5522<br>0348:C:A  | 22:chr7:55<br>220348:C:A  | 0.001824 |
| 26_c3-b   | 26 | TP53           | MODERATE                   | c.10T>A;<br>c.370T>A;<br>c.487T>A;<br>c.91T>A                                                     | p.Tyr4Asn;<br>p.Tyr124Asn;<br>p.Tyr163Asn;<br>p.Tyr31Asn | 23  | FALSE | chr17:757<br>8443:A:T  | 22:chr17:7<br>578443:A:T  | 0.001971 |
| 26_c3-b   | 26 | PIK3CA         | MODERATE                   | c.1645G>A                                                                                         | p.Asp549Asn                                              | 4   | FALSE | chr3:1789<br>36103:G:A | 22:chr3:17<br>8936103:G:A | 0.001163 |
| 26_c3-b   | 26 | PHLPP1         | MODERATE                   | c.2303C>A                                                                                         | p.Ser768Tyr                                              | 0   | FALSE | chr18:605<br>63103:C:A | 22:chr18:6<br>0563103:C:A | 0.001739 |
| 26_c3-b   | 26 | KIT            | MODERATE                   | c.2197G>A;<br>c.2209G>A                                                                           | p.Asp733Asn;<br>p.Asp737Asn                              | 2   | FALSE | chr4:5559<br>7561:G:A  | 22:chr4:55<br>597561:G:A  | 0.001008 |
| 26_c3-b   | 26 | RET            | MODERATE                   | c.1580A>G                                                                                         | p.Glu527Gly                                              | 1   | FALSE | chr10:436<br>07604:A:G | 22:chr10:4<br>3607604:A:G | 0.002878 |
| 26_c3-b   | 26 | CSDE1;<br>NRAS | MODIFIER; MODERATE         | c.*2430G>T;<br>c.*2523G>T;<br>c.*2817G>T;<br>c.*2910G>T;<br>c.*2964G>T;<br>c.*3057G>T;<br>c.38G>T | ; p.Gly13Val                                             | 238 | FALSE | chr1:1152<br>58744:C:A | 22:chr1:11<br>5258744:C:A | 0.001125 |

|         |    |                    |                    |                                                                                 |                                                                                                                 |     |       |                        |                               |          |
|---------|----|--------------------|--------------------|---------------------------------------------------------------------------------|-----------------------------------------------------------------------------------------------------------------|-----|-------|------------------------|-------------------------------|----------|
| 26_c3-b | 26 | FGFR1              | MODERATE           | c.1060C>T;<br>c.1066C>T;<br>c.1303C>T;<br>c.1327C>T;<br>c.1333C>T;<br>c.1426C>T | p.Arg354Trp<br>;<br>p.Arg356Trp<br>;<br>p.Arg435Trp<br>;<br>p.Arg443Trp<br>;<br>p.Arg445Trp<br>;<br>p.Arg476Trp | 2   | FALSE | chr8:3827<br>5843:G:A  | 22:chr8:38<br>275843:G:<br>A  | 0.001018 |
| 26_c3-b | 26 | CTNNB1             | MODERATE           | c.1972G>T                                                                       | p.Val658Phe                                                                                                     | 0   | FALSE | chr3:4127<br>8096:G:T  | 22:chr3:41<br>278096:G:<br>T  | 0.001039 |
| 26_c3-b | 26 | KIT                | MODERATE           | c.1485C>A                                                                       | p.Asn495Lys                                                                                                     | 1   | FALSE | chr4:5559<br>2161:C:A  | 22:chr4:55<br>592161:C:<br>A  | 0.001241 |
| 26_c3-b | 26 | KRAS               | HIGH               | c.64C>T                                                                         | p.Gln22*                                                                                                        | 15  | FALSE | chr12:253<br>98255:G:A | 22:chr12:2<br>5398255:G<br>:A | 0.001044 |
| 26_c3-b | 26 | HOXD-AS2;<br>HOXD8 | MODIFIER; MODERATE | n.*692G>T<br>;<br>c.22C>A;<br>c.574C>A                                          | p.Gln8Lys;<br>p.Gln192Lys                                                                                       | 0   | FALSE | chr2:1769<br>95668:C:A | 22:chr2:17<br>6995668:C<br>:A | 0.002447 |
| 26_c3-b | 26 | FGFR1              | MODERATE           | c.487C>T;<br>c.493C>T;<br>c.736C>T;<br>c.754C>T;<br>c.760C>T;<br>c.853C>T       | p.Arg163Trp<br>;<br>p.Arg165Trp<br>;<br>p.Arg246Trp<br>;<br>p.Arg252Trp<br>;<br>p.Arg254Trp<br>;<br>p.Arg285Trp | 1   | FALSE | chr8:3828<br>2203:G:A  | 22:chr8:38<br>282203:G:<br>A  | 0.00158  |
| 26_c3-b | 26 | TP53               | MODERATE; MODIFIER | c.115G>T;<br>c.232G>T;<br>c.-279G>T;<br>c.-360G>T                               | p.Ala39Ser;<br>p.Ala78Ser;                                                                                      | 1   | FALSE | chr17:757<br>9455:C:A  | 22:chr17:7<br>579455:C:<br>A  | 0.001397 |
| 26_c3-b | 26 | GNA11              | MODERATE           | c.625C>A                                                                        | p.Gln209Lys                                                                                                     | 3   | FALSE | chr19:311<br>8941:C:A  | 22:chr19:3<br>118941:C:<br>A  | 0.001592 |
| 26_c3-b | 26 | TP53               | MODERATE           | c.265C>T;<br>c.346C>T;<br>c.625C>T;<br>c.742C>T                                 | p.Arg89Trp;<br>p.Arg116Trp<br>;<br>p.Arg209Trp<br>;<br>p.Arg248Trp                                              | 559 | FALSE | chr17:757<br>7539:G:A  | 22:chr17:7<br>577539:G:<br>A  | 0.001093 |
| 26_c3-b | 26 | MET                | MODERATE           | c.143C>T                                                                        | p.Ala48Val                                                                                                      | 1   | FALSE | chr7:1163<br>39281:C:T | 22:chr7:11<br>6339281:C<br>:T | 0.000947 |

|         |    |                             |                    |                                                                                                                      |                                                                        |    |       |                        |                               |          |
|---------|----|-----------------------------|--------------------|----------------------------------------------------------------------------------------------------------------------|------------------------------------------------------------------------|----|-------|------------------------|-------------------------------|----------|
| 26_c3-b | 26 | HOXD-AS2;<br>HOXD8          | MODIFIER; MODERATE | n.*692C>T;<br>;<br>c.260G>A;<br>c.809G>A;<br>c.812G>A                                                                | p.Gly87Glu;<br>p.Gly270Glu<br>;<br>p.Gly271Glu                         | 0  | FALSE | chr2:1769<br>96279:G:A | 22:chr2:17<br>6996279:G<br>:A | 0.001019 |
| 26_c3-b | 26 | KLLN;<br>PTEN               | MODIFIER; LOW      | c.-951G>T;<br>c.78C>A                                                                                                | ; p.Thr26Thr                                                           | 2  | FALSE | chr10:896<br>24304:C:A | 22:chr10:8<br>9624304:C<br>:A | 0.001585 |
| 26_c3-b | 26 | GNA11                       | MODERATE           | c.997G>A                                                                                                             | p.Asp333As<br>n                                                        | 1  | FALSE | chr19:312<br>1094:G:A  | 22:chr19:3<br>121094:G:<br>A  | 0.001065 |
| 26_c3-b | 26 | NF1                         | MODERATE           | c.4462C>T;<br>c.4525C>T                                                                                              | p.Arg1488C<br>ys;<br>p.Arg1509C<br>ys                                  | 1  | FALSE | chr17:295<br>87481:C:T | 22:chr17:2<br>9587481:C<br>:T | 0.001072 |
| 26_c3-b | 26 | PTEN                        | HIGH               | c.688G>T                                                                                                             | p.Gly230*                                                              | 2  | FALSE | chr10:897<br>17663:G:T | 22:chr10:8<br>9717663:G<br>:T | 0.001097 |
| 26_c3-b | 26 | PIK3CA                      | MODERATE           | c.478C>A                                                                                                             | p.His160Asn                                                            | 1  | FALSE | chr3:1789<br>17603:C:A | 22:chr3:17<br>8917603:C<br>:A | 0.001159 |
| 26_c3-b | 26 | KIT                         | MODERATE           | c.1648G>A<br>;<br>c.1660G>A                                                                                          | p.Glu550Lys<br>;<br>p.Glu554Lys                                        | 3  | FALSE | chr4:5559<br>3594:G:A  | 22:chr4:55<br>593594:G:<br>A  | 0.00115  |
| 26_c3-b | 26 | ERBB2;<br>MIEN1;<br>MIR4728 | MODIFIER; MODERATE | c.3160-<br>319G>A;<br>c.3145G>A<br>;<br>c.3190G>A<br>;<br>c.3235G>A<br>;<br>n.3559G>A<br>;<br>c.*388C>T;<br>n.*67G>A | p.Glu1049Ly<br>s;<br>p.Glu1064Ly<br>s;<br>p.Glu1079Ly<br>s             | 1  | FALSE | chr17:378<br>83623:G:A | 22:chr17:3<br>7883623:G<br>:A | 0.001411 |
| 26_c3-b | 26 | EPHA3                       | MODERATE           | c.1132C>A                                                                                                            | p.Pro378Thr                                                            | 0  | FALSE | chr3:8939<br>1066:C:A  | 22:chr3:89<br>391066:C:<br>A  | 0.001308 |
| 26_c3-b | 26 | RET                         | MODERATE           | c.2161C>T                                                                                                            | p.Arg721Trp                                                            | 1  | FALSE | chr10:436<br>12056:C:T | 22:chr10:4<br>3612056:C<br>:T | 0.001546 |
| 26_c3-b | 26 | EGFR                        | MODIFIER; MODERATE | c.*1464C><br>A;<br>c.1310C>A                                                                                         | ; p.Ser437Tyr                                                          | 1  | FALSE | chr7:5522<br>7843:C:A  | 22:chr7:55<br>227843:C:<br>A  | 0.001172 |
| 26_c3-b | 26 | TP53                        | MODERATE           | c.232A>G;<br>c.313A>G;<br>c.592A>G;<br>c.709A>G                                                                      | p.Met78Val;<br>p.Met105Va<br>l;<br>p.Met198Va<br>l;<br>p.Met237Va<br>l | 10 | FALSE | chr17:757<br>7572:T:C  | 22:chr17:7<br>577572:T:<br>C  | 0.001025 |

|         |    |                    |                    |                                                                           |                                                                                             |     |       |                    |                       |          |
|---------|----|--------------------|--------------------|---------------------------------------------------------------------------|---------------------------------------------------------------------------------------------|-----|-------|--------------------|-----------------------|----------|
| 26_c3-b | 26 | PTEN               | MODERATE           | c.729C>A                                                                  | p.Phe243Leu                                                                                 | 1   | FALSE | chr10:89717704:C:A | 22:chr10:89717704:C:A | 0.001294 |
| 26_c3-b | 26 | TP53               | MODERATE; MODIFIER | c.140C>T;<br>c.257C>T;<br>c.-279C>T;<br>c.-360C>T                         | p.Ala47Val;<br>p.Ala86Val;                                                                  | 1   | FALSE | chr17:7579430:G:A  | 22:chr17:7579430:G:A  | 0.001356 |
| 26_c3-b | 26 | ALK                | MODERATE           | c.1588G>A                                                                 | p.Glu530Lys                                                                                 | 1   | FALSE | chr2:29541229:C:T  | 22:chr2:29541229:C:T  | 0.001122 |
| 26_c3-b | 26 | TP53               | MODIFIER; MODERATE | c.-3G>A;<br>c.358G>A;<br>c.475G>A;<br>c.79G>A                             | p.Ala120Thr;<br>p.Ala159Thr;<br>p.Ala27Thr                                                  | 23  | FALSE | chr17:7578455:C:T  | 22:chr17:7578455:C:T  | 0.001295 |
| 26_c3-b | 26 | TP53               | MODERATE           | c.340C>T;<br>c.421C>T;<br>c.700C>T;<br>c.817C>T                           | p.Arg114Cys;<br>p.Arg141Cys;<br>p.Arg234Cys;<br>p.Arg273Cys                                 | 601 | FALSE | chr17:7577121:G:A  | 22:chr17:7577121:G:A  | 0.001723 |
| 26_c3-b | 26 | TP53               | MODERATE; MODIFIER | c.206C>T;<br>c.89C>T; c.-279C>T; c.-360C>T                                | p.Ala69Val;<br>p.Ala30Val;                                                                  | 3   | FALSE | chr17:7579481:G:A  | 22:chr17:7579481:G:A  | 0.001485 |
| 26_c3-b | 26 | KRAS               | MODERATE           | c.182A>T                                                                  | p.Gln61Leu                                                                                  | 92  | FALSE | chr12:25380276:T:A | 22:chr12:25380276:T:A | 0.266735 |
| 26_c3-b | 26 | PIK3CA             | MODERATE           | c.1345C>A                                                                 | p.Pro449Thr                                                                                 | 3   | FALSE | chr3:178928067:C:A | 22:chr3:178928067:C:A | 0.001285 |
| 26_c3-b | 26 | FGFR1              | MODERATE           | c.488G>T;<br>c.494G>T;<br>c.737G>T;<br>c.755G>T;<br>c.761G>T;<br>c.854G>T | p.Arg163Leu;<br>p.Arg165Leu;<br>p.Arg246Leu;<br>p.Arg252Leu;<br>p.Arg254Leu;<br>p.Arg285Leu | 1   | FALSE | chr8:38282202:C:A  | 22:chr8:38282202:C:A  | 0.001053 |
| 26_c3-b | 26 | HOXD-AS2;<br>HOXD8 | MODIFIER; MODERATE | n.*692C>T;<br>c.304G>A;<br>c.853G>A;<br>c.856G>A                          | p.Glu102Lys;<br>p.Glu285Lys;<br>p.Glu286Lys                                                 | 0   | FALSE | chr2:176996323:G:A | 22:chr2:176996323:G:A | 0.001553 |

|         |    |        |                    |                                                                                       |                                                                            |    |       |                             |                                |          |
|---------|----|--------|--------------------|---------------------------------------------------------------------------------------|----------------------------------------------------------------------------|----|-------|-----------------------------|--------------------------------|----------|
| 26_c3-b | 26 | HGF    | MODERATE           | c.1057G>T;<br>c.1072G>T                                                               | p.Asp353Tyr;<br>p.Asp358Tyr                                                | 0  | FALSE | chr7:8135<br>5302:C:A       | 22:chr7:81<br>355302:C:<br>A   | 0.001096 |
| 26_c3-b | 26 | HGF    | MODERATE           | c.908G>T;<br>c.923G>T                                                                 | p.Gly303Val;<br>p.Gly308Val                                                | 0  | FALSE | chr7:8135<br>9038:C:A       | 22:chr7:81<br>359038:C:<br>A   | 0.000966 |
| 26_c3-b | 26 | KIT    | MODERATE           | c.1465G>A                                                                             | p.Val489Ile                                                                | 1  | FALSE | chr4:5559<br>2141:G:A       | 22:chr4:55<br>592141:G:<br>A   | 0.001167 |
| 26_c3-b | 26 | TP53   | MODIFIER; MODERATE | c.*168A>G;<br>;<br>c.*80A>G;<br>c.1061A>G;<br>;<br>c.584A>G;<br>c.665A>G;<br>c.944A>G | p.Gln354Arg;<br>;<br>p.Gln195Arg;<br>;<br>p.Gln222Arg;<br>;<br>p.Gln315Arg | 2  | FALSE | chr17:757<br>3966:T:C       | 22:chr17:7<br>573966:T:<br>C   | 0.000961 |
| 26_c3-b | 26 | RET    | MODERATE           | c.1538C>T                                                                             | p.Ala513Val                                                                | 1  | FALSE | chr10:436<br>07562:C:T      | 22:chr10:4<br>3607562:C:<br>:T | 0.001037 |
| 26_c3-b | 26 | CWH43  | MODERATE           | c.1813G>A;<br>c.1894G>A                                                               | p.Glu605Lys;<br>p.Glu632Lys                                                | 0  | FALSE | chr4:4905<br>2739:G:A       | 22:chr4:49<br>052739:G:<br>A   | 0.001058 |
| 26_c3-b | 26 | PTEN   | MODERATE           | c.731C>A                                                                              | p.Pro244His                                                                | 2  | FALSE | chr10:897<br>17706:C:A      | 22:chr10:8<br>9717706:C:<br>:A | 0.00128  |
| 26_c3-b | 26 | HGF    | MODERATE           | c.767G>A;<br>c.782G>A                                                                 | p.Arg256His;<br>p.Arg261His                                                | 0  | FALSE | chr7:8137<br>2752:C:T       | 22:chr7:81<br>372752:C:<br>T   | 0.001111 |
| 26_c3-b | 26 | DDR2   | MODERATE           | c.313C>A                                                                              | p.Arg105Ser                                                                | 2  | FALSE | chr1:1627<br>24541:C:A      | 22:chr1:16<br>2724541:C:<br>:A | 0.001316 |
| 26_c3-b | 26 | TP53   | MODERATE           | c.110G>A;<br>c.191G>A;<br>c.470G>A;<br>c.587G>A                                       | p.Arg37Gln;<br>p.Arg64Gln;<br>p.Arg157Gln;<br>;<br>p.Arg196Gln             | 19 | FALSE | chr17:757<br>8262:C:T       | 22:chr17:7<br>578262:C:<br>T   | 0.001061 |
| 26_c3-b | 26 | CTNNB1 | MODERATE           | c.2129G>A                                                                             | p.Arg710His                                                                | 0  | FALSE | chr3:4127<br>9559:G:A       | 22:chr3:41<br>279559:G:<br>A   | 0.001389 |
| 26_c3-b | 26 | TP53   | MODERATE           | c.245C>T;<br>c.326C>T;<br>c.605C>T;<br>c.722C>T                                       | p.Ser82Phe;<br>p.Ser109Phe;<br>;<br>p.Ser202Phe;<br>;<br>p.Ser241Phe       | 91 | FALSE | chr17:757<br>7559:G:A       | 22:chr17:7<br>577559:G:<br>A   | 0.004199 |
| 26_c3-b | 26 | AKT1   | MODERATE           | c.104T>C                                                                              | p.Phe35Ser                                                                 | 1  | FALSE | chr14:105<br>246496:A:<br>G | 22:chr14:1<br>05246496:<br>A:G | 0.00102  |

|         |    |                 |                    |                                                                                                   |                                                            |      |       |                        |                               |          |
|---------|----|-----------------|--------------------|---------------------------------------------------------------------------------------------------|------------------------------------------------------------|------|-------|------------------------|-------------------------------|----------|
| 26_c3-b | 26 | CWH43           | MODERATE           | c.1535G>A;<br>c.1616G>A                                                                           | p.Gly512Asp;<br>p.Gly539Asp                                | 0    | FALSE | chr4:4903<br>4690:G:A  | 22:chr4:49<br>034690:G:<br>A  | 0.001102 |
| 26_c3-b | 26 | GNA11           | MODERATE           | c.1030G>A                                                                                         | p.Val344Met                                                | 1    | FALSE | chr19:312<br>1127:G:A  | 22:chr19:3<br>121127:G:<br>A  | 0.003165 |
| 26_c3-b | 26 | MET             | MODERATE           | c.608C>A                                                                                          | p.Ser203Tyr                                                | 1    | FALSE | chr7:1163<br>39746:C:A | 22:chr7:11<br>6339746:C<br>:A | 0.001943 |
| 26_c3-b | 26 | EPHA3           | HIGH               | c.1515C>A                                                                                         | p.Tyr505*                                                  | 0    | FALSE | chr3:8944<br>8551:C:A  | 22:chr3:89<br>448551:C:<br>A  | 0.003636 |
| 26_c3-b | 26 | PHLPP1          | MODERATE           | c.2452G>A                                                                                         | p.Val818Ile                                                | 0    | FALSE | chr18:605<br>70204:G:A | 22:chr18:6<br>0570204:G<br>:A | 0.001043 |
| 26_c3-b | 26 | AKT3            | MODERATE           | c.899C>T                                                                                          | p.Ala300Val                                                | 0    | FALSE | chr1:2437<br>27071:G:A | 22:chr1:24<br>3727071:G<br>:A | 0.000974 |
| 26_c3-b | 26 | PIK3CA          | MODERATE           | c.1633G>A                                                                                         | p.Glu545Lys                                                | 1189 | FALSE | chr3:1789<br>36091:G:A | 22:chr3:17<br>8936091:G<br>:A | 0.013812 |
| 26_c3-b | 26 | CTNNB1          | MODERATE           | c.1004A>C                                                                                         | p.Lys335Thr                                                | 0    | FALSE | chr3:4126<br>8766:A:C  | 22:chr3:41<br>268766:A:<br>C  | 0.038366 |
| 26_c3-b | 26 | GAPDH;<br>IFFO1 | MODERATE; MODIFIER | c.503C>T;<br>c.629C>T;<br>c.*1743G><br>A;<br>c.*1746G><br>A;<br>c.*1770G><br>A;<br>n.*2798G><br>A | p.Ser168Phe;<br>p.Ser210Phe;<br>;                          | 0    | FALSE | chr12:664<br>6853:C:T  | 22:chr12:6<br>646853:C:<br>T  | 0.001184 |
| 26_c3-b | 26 | PTEN            | MODERATE           | c.443C>A                                                                                          | p.Ala148Glu                                                | 1    | FALSE | chr10:896<br>92959:C:A | 22:chr10:8<br>9692959:C<br>:A | 0.002078 |
| 26_c3-b | 26 | TP53            | MODERATE           | c.293T>C;<br>c.374T>C;<br>c.653T>C;<br>c.770T>C                                                   | p.Leu98Pro;<br>p.Leu125Pro;<br>p.Leu218Pro;<br>p.Leu257Pro | 11   | FALSE | chr17:757<br>7511:A:G  | 22:chr17:7<br>577511:A:<br>G  | 0.001141 |
| 26_c3-b | 26 | PHLPP1          | MODERATE           | c.3604C>T                                                                                         | p.Arg1202Cys                                               | 0    | FALSE | chr18:606<br>39790:C:T | 22:chr18:6<br>0639790:C<br>:T | 0.001046 |
| 26_c3-b | 26 | TP53            | MODERATE; MODIFIER | c.100G>T;<br>c.217G>T;<br>c.-279G>T;<br>c.-360G>T                                                 | p.Val34Leu;<br>p.Val73Leu;                                 | 5    | FALSE | chr17:757<br>9470:C:A  | 22:chr17:7<br>579470:C:<br>A  | 0.001415 |
| 26_c3-b | 26 | CTNNB1          | MODERATE           | c.96C>A                                                                                           | p.Asp32Glu                                                 | 0    | FALSE | chr3:4126<br>6099:C:A  | 22:chr3:41<br>266099:C:<br>A  | 0.001019 |

|         |    |                   |                    |                                                |                                                             |     |       |                    |                       |          |
|---------|----|-------------------|--------------------|------------------------------------------------|-------------------------------------------------------------|-----|-------|--------------------|-----------------------|----------|
| 26_c3-b | 26 | NF1               | MODERATE           | c.5878A>G;<br>; c.5941A>G                      | p.Met1960Val;<br>p.Met1981Val                               | 1   | FALSE | chr17:29661984:A:G | 22:chr17:29661984:A:G | 0.001293 |
| 26_c3-b | 26 | NF1               | MODERATE           | c.2695T>G                                      | p.Leu899Val                                                 | 3   | FALSE | chr17:29556328:T:G | 22:chr17:29556328:T:G | 0.020174 |
| 26_c3-b | 26 | MET               | HIGH               | c.3508C>T;<br>c.3562C>T                        | p.Arg1170*;<br>p.Arg1188*                                   | 4   | FALSE | chr7:116418997:C:T | 22:chr7:116418997:C:T | 0.001012 |
| 26_c3-b | 26 | CTNNB1            | MODERATE           | c.451C>T                                       | p.Arg151Cys                                                 | 0   | FALSE | chr3:41266654:C:T  | 22:chr3:41266654:C:T  | 0.001024 |
| 26_c3-b | 26 | KRAS              | MODERATE           | c.204G>T                                       | p.Arg68Ser                                                  | 1   | FALSE | chr12:25380254:C:A | 22:chr12:25380254:C:A | 0.001053 |
| 26_c3-b | 26 | FGFR1             | MODIFIER; MODERATE | c.-32G>A;<br>c.160G>A;<br>c.61G>A              | ; p.Ala54Thr;<br>p.Ala21Thr                                 | 2   | FALSE | chr8:38314904:C:T  | 22:chr8:38314904:C:T  | 0.001089 |
| 26_c3-b | 26 | MAP2K1            | MODERATE           | c.198C>A                                       | p.Asp66Glu                                                  | 4   | FALSE | chr15:66727482:C:A | 22:chr15:66727482:C:A | 0.001905 |
| 26_c3-b | 26 | EGFR;<br>EGFR-AS1 | MODERATE; MODIFIER | c.2356G>A;<br>; n.1206C>T                      | p.Val786Met;                                                | 6   | FALSE | chr7:55249058:G:A  | 22:chr7:55249058:G:A  | 0.001496 |
| 26_c3-b | 26 | TP53              | MODERATE           | c.128G>T;<br>c.407G>T;<br>c.47G>T;<br>c.524G>T | p.Arg43Leu;<br>p.Arg136Leu;<br>; p.Arg16Leu;<br>p.Arg175Leu | 979 | FALSE | chr17:7578406:C:A  | 22:chr17:7578406:C:A  | 0.001241 |
| 26_c3-b | 26 | CTNNB1            | MODERATE           | c.125C>A                                       | p.Thr42Lys                                                  | 0   | FALSE | chr3:41266128:C:A  | 22:chr3:41266128:C:A  | 0.001007 |
| 26_c3-b | 26 | CTNNB1            | MODERATE           | c.1147T>G                                      | p.Trp383Gly                                                 | 0   | FALSE | chr3:41274897:T:G  | 22:chr3:41274897:T:G  | 0.003283 |
| 26_c3-b | 26 | CTNNB1            | MODERATE           | c.122C>A                                       | p.Thr41Asn                                                  | 0   | FALSE | chr3:41266125:C:A  | 22:chr3:41266125:C:A  | 0.001517 |
| 26_c3-b | 26 | RET               | MODERATE           | c.1690A>C                                      | p.Thr564Pro                                                 | 1   | FALSE | chr10:43608342:A:C | 22:chr10:43608342:A:C | 0.009174 |
| 26_c3-b | 26 | CTNNB1            | MODERATE           | c.884C>A                                       | p.Ala295Asp                                                 | 0   | FALSE | chr3:41267300:C:A  | 22:chr3:41267300:C:A  | 0.001276 |
| 26_c3-b | 26 | TP53              | MODERATE; MODIFIER | c.208G>A;<br>c.91G>A; c.279G>A; c.360G>A       | p.Ala70Thr;<br>p.Ala31Thr;                                  | 1   | FALSE | chr17:7579479:C:T  | 22:chr17:7579479:C:T  | 0.002254 |
| 26_c3-b | 26 | EGFR              | MODERATE           | c.844G>A                                       | p.Glu282Lys                                                 | 1   | FALSE | chr7:55221800:G:A  | 22:chr7:55221800:G:A  | 0.001005 |



|         |    |                             |                    |                                                                                                                      |                                                               |    |       |                        |                               |          |
|---------|----|-----------------------------|--------------------|----------------------------------------------------------------------------------------------------------------------|---------------------------------------------------------------|----|-------|------------------------|-------------------------------|----------|
| 26_c3-b | 26 | TP53                        | MODERATE           | c.350C>T;<br>c.431C>T;<br>c.710C>T;<br>c.827C>T                                                                      | p.Ala117Val;<br>p.Ala144Val;<br>p.Ala237Val;<br>p.Ala276Val   | 10 | FALSE | chr17:757<br>7111:G:A  | 22:chr17:7<br>577111:G:<br>A  | 0.001145 |
| 26_c3-b | 26 | TP53                        | MODERATE           | c.15G>T;<br>c.375G>T;<br>c.492G>T;<br>c.96G>T                                                                        | p.Lys5Asn;<br>p.Lys125Asn<br>;<br>p.Lys164Asn<br>; p.Lys32Asn | 6  | FALSE | chr17:757<br>8438:C:A  | 22:chr17:7<br>578438:C:<br>A  | 0.001286 |
| 25_c3-2 | 25 | NF1                         | MODERATE           | c.2695T>G                                                                                                            | p.Leu899Val                                                   | 3  | FALSE | chr17:295<br>56328:T:G | 26:chr17:2<br>9556328:T<br>:G | 0.029268 |
| 25_c4-1 | 25 | PTEN                        | HIGH               | c.720C>A                                                                                                             | p.Tyr240*                                                     | 3  | FALSE | chr10:897<br>17695:C:A | 27:chr10:8<br>9717695:C<br>:A | 0.001413 |
| 25_c4-1 | 25 | PTEN                        | MODERATE           | c.923G>A                                                                                                             | p.Arg308His                                                   | 1  | FALSE | chr10:897<br>20772:G:A | 27:chr10:8<br>9720772:G<br>:A | 0.001889 |
| 25_c4-1 | 25 | RET                         | MODERATE           | c.1991C>A                                                                                                            | p.Ala664Asp                                                   | 2  | FALSE | chr10:436<br>10039:C:A | 27:chr10:4<br>3610039:C<br>:A | 0.001136 |
| 25_c4-1 | 25 | BRAF                        | MODERATE           | c.1202C>T                                                                                                            | p.Thr401Ile                                                   | 1  | FALSE | chr7:1404<br>82933:G:A | 27:chr7:14<br>0482933:G<br>:A | 0.002028 |
| 25_c4-1 | 25 | PTEN                        | HIGH               | c.688G>T                                                                                                             | p.Gly230*                                                     | 2  | FALSE | chr10:897<br>17663:G:T | 27:chr10:8<br>9717663:G<br>:T | 0.001937 |
| 25_c4-1 | 25 | PIK3CA                      | MODERATE           | c.518C>A                                                                                                             | p.Ser173Tyr                                                   | 1  | FALSE | chr3:1789<br>17643:C:A | 27:chr3:17<br>8917643:C<br>:A | 0.001329 |
| 25_c4-1 | 25 | PIK3CA                      | MODERATE           | c.1615C>A                                                                                                            | p.Pro539Thr                                                   | 3  | FALSE | chr3:1789<br>36073:C:A | 27:chr3:17<br>8936073:C<br>:A | 0.001507 |
| 25_c4-1 | 25 | ERBB2;<br>MIEN1;<br>MIR4728 | MODIFIER; MODERATE | c.3160-<br>213A>G;<br>c.3251A>G<br>;<br>c.3296A>G<br>;<br>c.3341A>G<br>;<br>n.3665A>G<br>;<br>c.*388T>C;<br>n.*67A>G | p.Glu1084Gl<br>y;<br>p.Glu1099Gl<br>y;<br>p.Glu1114Gl<br>y    | 1  | FALSE | chr17:378<br>83729:A:G | 27:chr17:3<br>7883729:A<br>:G | 0.001559 |
| 25_c4-1 | 25 | FGFR1                       | MODIFIER; MODERATE | c.-85G>T;<br>c.107G>T;<br>c.8G>T                                                                                     | ; p.Ser36Ile;<br>p.Ser3Ile                                    | 1  | FALSE | chr8:3831<br>4957:C:A  | 27:chr8:38<br>314957:C:<br>A  | 0.00122  |

|         |    |        |                    |                                                         |                                                            |       |       |                        |                           |          |
|---------|----|--------|--------------------|---------------------------------------------------------|------------------------------------------------------------|-------|-------|------------------------|---------------------------|----------|
| 25_c4-1 | 25 | TP53   | MODERATE           | c.248G>T;<br>c.329G>T;<br>c.608G>T;<br>c.725G>T         | p.Cys83Phe;<br>p.Cys110Phe;<br>p.Cys203Phe;<br>p.Cys242Phe | 72    | FALSE | chr17:757<br>7556:C:A  | 27:chr17:7<br>577556:C:A  | 0.001406 |
| 25_c4-1 | 25 | RET    | MODERATE           | c.1349G>A                                               | p.Ser450Asn                                                | 1     | FALSE | chr10:436<br>06740:G:A | 27:chr10:4<br>3606740:G:A | 0.001159 |
| 25_c4-1 | 25 | BRAF   | MODERATE           | c.1799T>A                                               | p.Val600Glu                                                | 23024 | FALSE | chr7:1404<br>53136:A:T | 27:chr7:14<br>0453136:A:T | 0.002937 |
| 25_c4-1 | 25 | MITF   | MODIFIER; MODERATE | c.-<br>53+197C><br>A;<br>c.104+241<br>88C>A;<br>c.48C>A | p.Phe16Leu                                                 | 0     | FALSE | chr3:6981<br>3040:C:A  | 27:chr3:69<br>813040:C:A  | 0.001358 |
| 25_c4-1 | 25 | PIK3CA | MODERATE           | c.478C>A                                                | p.His160Asn                                                | 1     | FALSE | chr3:1789<br>17603:C:A | 27:chr3:17<br>8917603:C:A | 0.001299 |
| 25_c4-1 | 25 | CTNNB1 | MODERATE           | c.1972G>T                                               | p.Val658Phe                                                | 0     | FALSE | chr3:4127<br>8096:G:T  | 27:chr3:41<br>278096:G:T  | 0.002926 |
| 25_c4-1 | 25 | NF1    | MODERATE           | c.5426G>A;<br>c.5489G>A                                 | p.Arg180His;<br>p.Arg1830His                               | 1     | FALSE | chr17:296<br>54737:G:A | 27:chr17:2<br>9654737:G:A | 0.0011   |
| 25_c4-1 | 25 | PHLPP1 | MODERATE           | c.1971C>A                                               | p.Phe657Leu                                                | 0     | FALSE | chr18:605<br>27739:C:A | 27:chr18:6<br>0527739:C:A | 0.00188  |
| 25_c4-1 | 25 | BRAF   | MODERATE           | c.1099C>T                                               | p.Pro367Ser                                                | 1     | FALSE | chr7:1404<br>94149:G:A | 27:chr7:14<br>0494149:G:A | 0.00146  |
| 25_c4-1 | 25 | CTNNB1 | MODERATE           | c.91C>A                                                 | p.Leu31Met                                                 | 0     | FALSE | chr3:4126<br>6094:C:A  | 27:chr3:41<br>266094:C:A  | 0.001456 |
| 25_c4-1 | 25 | PTEN   | HIGH               | c.633C>A                                                | p.Cys211*                                                  | 2     | FALSE | chr10:897<br>12015:C:A | 27:chr10:8<br>9712015:C:A | 0.002762 |
| 25_c4-1 | 25 | PHLPP1 | MODERATE           | c.2303C>A                                               | p.Ser768Tyr                                                | 0     | FALSE | chr18:605<br>63103:C:A | 27:chr18:6<br>0563103:C:A | 0.002187 |
| 25_c4-1 | 25 | PIK3CA | MODERATE           | c.3001C>A                                               | p.Leu1001Ile                                               | 3     | FALSE | chr3:1789<br>51946:C:A | 27:chr3:17<br>8951946:C:A | 0.00135  |
| 25_c4-1 | 25 | HGF    | MODERATE           | c.767G>A;<br>c.782G>A                                   | p.Arg256His;<br>p.Arg261His                                | 0     | FALSE | chr7:8137<br>2752:C:T  | 27:chr7:81<br>372752:C:T  | 0.001581 |
| 25_c4-1 | 25 | EPHA3  | MODERATE           | c.1280C>T                                               | p.Ala427Val                                                | 0     | FALSE | chr3:8939<br>1214:C:T  | 27:chr3:89<br>391214:C:T  | 0.001585 |
| 25_c4-1 | 25 | CWH43  | MODERATE           | c.1535G>A;<br>c.1616G>A                                 | p.Gly512Asp;<br>p.Gly539Asp                                | 0     | FALSE | chr4:4903<br>4690:G:A  | 27:chr4:49<br>034690:G:A  | 0.001371 |
| 25_c4-1 | 25 | CTNNB1 | MODERATE           | c.134C>A                                                | p.Ser45Tyr                                                 | 0     | FALSE | chr3:4126<br>6137:C:A  | 27:chr3:41<br>266137:C:A  | 0.002075 |

|         |    |                    |                    |                                                                                    |                                                                                             |    |       |                    |                       |          |
|---------|----|--------------------|--------------------|------------------------------------------------------------------------------------|---------------------------------------------------------------------------------------------|----|-------|--------------------|-----------------------|----------|
| 25_c4-1 | 25 | RET                | MODERATE           | c.1690A>C                                                                          | p.Thr564Pro                                                                                 | 1  | FALSE | chr10:43608342:A:C | 27:chr10:43608342:A:C | 0.019155 |
| 25_c4-1 | 25 | HOXD-AS2;<br>HOXD8 | MODIFIER; MODERATE | n.*692G>T;<br>; c.22C>A;<br>c.574C>A                                               | ; p.Gln8Lys;<br>p.Gln192Lys                                                                 | 0  | FALSE | chr2:176995668:C:A | 27:chr2:176995668:C:A | 0.002935 |
| 25_c4-1 | 25 | NF1                | MODERATE           | c.2695T>G                                                                          | p.Leu899Val                                                                                 | 3  | FALSE | chr17:29556328:T;G | 27:chr17:29556328:T;G | 0.040855 |
| 25_c4-1 | 25 | EGFR;<br>EGFR-AS1  | MODERATE; MODIFIER | c.2606A>G;<br>; n.-1T>C                                                            | p.Tyr869Cys                                                                                 | 1  | FALSE | chr7:55259548:A;G  | 27:chr7:55259548:A;G  | 0.001929 |
| 25_c4-1 | 25 | TP53               | MODIFIER; HIGH     | c.*143G>T;<br>; c.*55G>T;<br>c.1036G>T;<br>;<br>c.559G>T;<br>c.640G>T;<br>c.919G>T | ; p.Glu346*;<br>p.Glu187*;<br>p.Glu214*;<br>p.Glu307*                                       | 4  | FALSE | chr17:7573991:C:A  | 27:chr17:7573991:C:A  | 0.001203 |
| 25_c4-1 | 25 | TP53               | MODERATE           | c.121G>T;<br>c.400G>T;<br>c.40G>T;<br>c.517G>T                                     | p.Val41Leu;<br>p.Val134Leu;<br>;<br>p.Val14Leu;<br>p.Val173Leu                              | 55 | FALSE | chr17:7578413:C:A  | 27:chr17:7578413:C:A  | 0.001642 |
| 25_c4-1 | 25 | NF1                | MODERATE           | c.3917G>A                                                                          | p.Arg1306Gln                                                                                | 2  | FALSE | chr17:29562982:G:A | 27:chr17:29562982:G:A | 0.001585 |
| 25_c4-1 | 25 | AKT3               | MODERATE           | c.1100G>A                                                                          | p.Arg367Gln                                                                                 | 0  | FALSE | chr1:243716094:C:T | 27:chr1:243716094:C:T | 0.001437 |
| 25_c4-1 | 25 | FGFR1              | MODERATE           | c.359C>T;<br>c.365C>T;<br>c.608C>T;<br>c.626C>T;<br>c.632C>T;<br>c.725C>T          | p.Ala120Val;<br>p.Ala122Val;<br>p.Ala203Val;<br>p.Ala209Val;<br>p.Ala211Val;<br>p.Ala242Val | 1  | FALSE | chr8:38283753:G:A  | 27:chr8:38283753:G:A  | 0.001394 |
| 25_c4-1 | 25 | CTNNB1             | MODERATE           | c.884C>A                                                                           | p.Ala295Asp                                                                                 | 0  | FALSE | chr3:41267300:C:A  | 27:chr3:41267300:C:A  | 0.001592 |
| 25_c4-1 | 25 | DDR2               | MODERATE           | c.313C>A                                                                           | p.Arg105Ser                                                                                 | 2  | FALSE | chr1:162724541:C:A | 27:chr1:162724541:C:A | 0.001826 |

|         |    |        |                    |                                                   |                                                                         |    |       |                        |                               |          |
|---------|----|--------|--------------------|---------------------------------------------------|-------------------------------------------------------------------------|----|-------|------------------------|-------------------------------|----------|
| 25_c4-1 | 25 | TP53   | MODERATE           | c.355C>T;<br>c.436C>T;<br>c.715C>T;<br>c.832C>T   | p.Pro119Ser<br>;<br>p.Pro146Ser<br>;<br>p.Pro239Ser<br>;<br>p.Pro278Ser | 59 | FALSE | chr17:757<br>7106:G:A  | 27:chr17:7<br>577106:G:<br>A  | 0.00293  |
| 25_c4-1 | 25 | TP53   | MODERATE; MODIFIER | c.115G>T;<br>c.232G>T;<br>c.-279G>T;<br>c.-360G>T | p.Ala39Ser;<br>p.Ala78Ser;                                              | 1  | FALSE | chr17:757<br>9455:C:A  | 27:chr17:7<br>579455:C:<br>A  | 0.003457 |
| 25_c4-1 | 25 | AKT3   | MODERATE           | c.825G>T                                          | p.Glu275As<br>p                                                         | 0  | FALSE | chr1:2437<br>27145:C:A | 27:chr1:24<br>3727145:C<br>:A | 0.002655 |
| 25_c4-1 | 25 | BRAF   | MODERATE           | c.436C>T                                          | p.Arg146Trp                                                             | 1  | FALSE | chr7:1405<br>34477:G:A | 27:chr7:14<br>0534477:G<br>:A | 0.001296 |
| 25_c4-1 | 25 | GNA11  | MODERATE           | c.440G>A                                          | p.Arg147His                                                             | 1  | FALSE | chr19:311<br>3446:G:A  | 27:chr19:3<br>113446:G:<br>A  | 0.00214  |
| 25_c4-1 | 25 | PTEN   | MODERATE           | c.443C>A                                          | p.Ala148Glu                                                             | 1  | FALSE | chr10:896<br>92959:C:A | 27:chr10:8<br>9692959:C<br>:A | 0.001695 |
| 25_c4-1 | 25 | ERBB2  | MODERATE; MODIFIER | c.560G>A;<br>c.605G>A;<br>c.650G>A;<br>n.974G>A   | p.Arg187His<br>;<br>p.Arg202His<br>;<br>p.Arg217His<br>;                | 1  | FALSE | chr17:378<br>66345:G:A | 27:chr17:3<br>7866345:G<br>:A | 0.00128  |
| 25_c4-1 | 25 | ALK    | HIGH               | c.4414G>T                                         | p.Glu1472*                                                              | 1  | FALSE | chr2:2941<br>6539:C:A  | 27:chr2:29<br>416539:C:<br>A  | 0.001074 |
| 25_c4-1 | 25 | NF1    | MODERATE           | c.7583C>T;<br>c.7646C>T                           | p.Ser2528Le<br>u;<br>p.Ser2549Le<br>u                                   | 3  | FALSE | chr17:296<br>83508:C:T | 27:chr17:2<br>9683508:C<br>:T | 0.001379 |
| 25_c4-1 | 25 | KIT    | MODERATE           | c.1485C>A                                         | p.Asn495Lys                                                             | 1  | FALSE | chr4:5559<br>2161:C:A  | 27:chr4:55<br>592161:C:<br>A  | 0.003049 |
| 25_c4-1 | 25 | TP53   | MODERATE           | c.392G>A;<br>c.473G>A;<br>c.752G>A;<br>c.869G>A   | p.Arg131His<br>;<br>p.Arg158His<br>;<br>p.Arg251His<br>;<br>p.Arg290His | 20 | FALSE | chr17:757<br>7069:C:T  | 27:chr17:7<br>577069:C:<br>T  | 0.001429 |
| 25_c4-1 | 25 | EPHA3  | MODERATE           | c.237C>A                                          | p.Asn79Lys                                                              | 0  | FALSE | chr3:8925<br>9093:C:A  | 27:chr3:89<br>259093:C:<br>A  | 0.001376 |
| 25_c4-1 | 25 | CTNNB1 | MODERATE           | c.861C>A                                          | p.Asn287Lys                                                             | 0  | FALSE | chr3:4126<br>7277:C:A  | 27:chr3:41<br>267277:C:<br>A  | 0.001483 |

|         |    |        |                    |                                                   |                                                             |      |       |                    |                       |          |
|---------|----|--------|--------------------|---------------------------------------------------|-------------------------------------------------------------|------|-------|--------------------|-----------------------|----------|
| 25_c4-1 | 25 | EGFR   | MODIFIER; MODERATE | c.*1464G>A;<br>c.1606G>A                          | p.Val536Met                                                 | 1    | FALSE | chr7:55229299:G:A  | 27:chr7:55229299:G:A  | 0.002143 |
| 25_c4-1 | 25 | NF1    | MODERATE           | c.6405C>A;<br>c.6468C>A                           | p.Phe2135Leu;<br>p.Phe2156Leu                               | 1    | FALSE | chr17:29664426:C:A | 27:chr17:29664426:C:A | 0.001499 |
| 26_c5-1 | 26 | KRAS   | MODERATE           | c.182A>T                                          | p.Gln61Leu                                                  | 92   | FALSE | chr12:25380276:T:A | 28:chr12:25380276:T:A | 0.130112 |
| 26_c5-1 | 26 | CTNNB1 | MODERATE           | c.1004A>C                                         | p.Lys335Thr                                                 | 0    | FALSE | chr3:41268766:A:C  | 28:chr3:41268766:A:C  | 0.021552 |
| 26_c5-1 | 26 | PTEN   | MODERATE           | c.815A>C                                          | p.His272Pro                                                 | 2    | FALSE | chr10:89720664:A:C | 28:chr10:89720664:A:C | 0.00369  |
| 26_c5-1 | 26 | NF1    | MODERATE           | c.7718G>A;<br>c.7781G>A                           | p.Arg2573His;<br>p.Arg2594His                               | 3    | FALSE | chr17:29684020:G:A | 28:chr17:29684020:G:A | 0.001592 |
| 26_c5-1 | 26 | NF1    | MODERATE           | c.2695T>G                                         | p.Leu899Val                                                 | 3    | FALSE | chr17:29556328:T:G | 28:chr17:29556328:T:G | 0.02828  |
| 26_c5-1 | 26 | EPHA3  | MODERATE           | c.1132C>A                                         | p.Pro378Thr                                                 | 0    | FALSE | chr3:89391066:C:A  | 28:chr3:89391066:C:A  | 0.001376 |
| 26_c5-1 | 26 | DDR2   | MODERATE           | c.1598C>A                                         | p.Thr533Lys                                                 | 1    | FALSE | chr1:162741907:C:A | 28:chr1:162741907:C:A | 0.001511 |
| 26_c5-1 | 26 | PIK3CA | MODERATE           | c.518C>A                                          | p.Ser173Tyr                                                 | 1    | FALSE | chr3:178917643:C:A | 28:chr3:178917643:C:A | 0.001802 |
| 26_c5-1 | 26 | TP53   | MODIFIER; MODERATE | c.-13G>T;<br>c.105G>T;<br>c.-279G>T;<br>c.-360G>T | p.Leu35Phe                                                  | 2    | FALSE | chr17:7579582:C:A  | 28:chr17:7579582:C:A  | 0.001923 |
| 26_c5-1 | 26 | RET    | MODERATE           | c.1690A>C                                         | p.Thr564Pro                                                 | 1    | FALSE | chr10:43608342:A:C | 28:chr10:43608342:A:C | 0.009375 |
| 26_c5-1 | 26 | PIK3CA | MODERATE           | c.1633G>A                                         | p.Glu545Lys                                                 | 1189 | FALSE | chr3:178936091:G:A | 28:chr3:178936091:G:A | 0.006431 |
| 26_c5-1 | 26 | TP53   | MODERATE           | c.368G>T;<br>c.449G>T;<br>c.728G>T;<br>c.845G>T   | p.Arg123Leu;<br>p.Arg150Leu;<br>p.Arg243Leu;<br>p.Arg282Leu | 26   | FALSE | chr17:7577093:C:A  | 28:chr17:7577093:C:A  | 0.001606 |
| 26_c5-1 | 26 | PIK3CA | MODERATE           | c.1645G>A                                         | p.Asp549Asn                                                 | 4    | FALSE | chr3:178936103:G:A | 28:chr3:178936103:G:A | 0.001726 |

|         |    |        |                |                                                      |                                                                         |     |       |                        |                               |          |
|---------|----|--------|----------------|------------------------------------------------------|-------------------------------------------------------------------------|-----|-------|------------------------|-------------------------------|----------|
| 26_c5-1 | 26 | TP53   | HIGH; MODIFIER | c.184G>T;<br>c.67G>T; c.-<br>279G>T; c.-<br>360G>T   | p.Glu62*;<br>p.Glu23*;                                                  | 8   | FALSE | chr17:757<br>9503:C:A  | 28:chr17:7<br>579503:C:<br>A  | 0.002125 |
| 26_c5-1 | 26 | EPHA3  | MODERATE       | c.1142G>A                                            | p.Arg381His                                                             | 0   | FALSE | chr3:8939<br>1076:G:A  | 28:chr3:89<br>391076:G:<br>A  | 0.001383 |
| 26_c5-1 | 26 | TP53   | MODERATE       | c.245C>T;<br>c.326C>T;<br>c.605C>T;<br>c.722C>T      | p.Ser82Phe;<br>p.Ser109Phe<br>;<br>p.Ser202Phe<br>;<br>p.Ser241Phe      | 91  | FALSE | chr17:757<br>7559:G:A  | 28:chr17:7<br>577559:G:<br>A  | 0.002125 |
| 26_c5-1 | 26 | TP53   | MODERATE       | c.341G>A;<br>c.422G>A;<br>c.701G>A;<br>c.818G>A      | p.Arg114His<br>;<br>p.Arg141His<br>;<br>p.Arg234His<br>;<br>p.Arg273His | 647 | TRUE  | chr17:757<br>7120:C:T  | 28:chr17:7<br>577120:C:<br>T  | 0.001676 |
| 26_c5-1 | 26 | KIT    | MODERATE       | c.1469A>G                                            | p.Glu490Gly                                                             | 1   | FALSE | chr4:5559<br>2145:A:G  | 28:chr4:55<br>592145:A:<br>G  | 0.001605 |
| 26_c5-1 | 26 | EGFR   | MODIFIER; HIGH | c.*2364G><br>A;<br>c.2193G>A                         | p.Trp731*                                                               | 2   | FALSE | chr7:5524<br>2423:G:A  | 28:chr7:55<br>242423:G:<br>A  | 0.001458 |
| 26_c5-1 | 26 | CTNNB1 | MODERATE       | c.122C>A                                             | p.Thr41Asn                                                              | 0   | FALSE | chr3:4126<br>6125:C:A  | 28:chr3:41<br>266125:C:<br>A  | 0.00219  |
| 26_c5-1 | 26 | TP53   | MODERATE       | c.224A>G;<br>c.305A>G;<br>c.584A>G;<br>c.701A>G      | p.Tyr75Cys;<br>p.Tyr102Cys<br>;<br>p.Tyr195Cys<br>;<br>p.Tyr234Cys      | 94  | FALSE | chr17:757<br>7580:T:C  | 28:chr17:7<br>577580:T:<br>C  | 0.002022 |
| 26_c5-1 | 26 | NF1    | MODIFIER; HIGH | c.*2165G><br>A;<br>c.2087G>A                         | p.Trp696*                                                               | 2   | FALSE | chr17:295<br>53538:G:A | 28:chr17:2<br>9553538:G<br>:A | 0.001463 |
| 26_c5-1 | 26 | PIK3R1 | MODERATE       | c.1702C>A<br>;<br>c.613C>A;<br>c.802C>A;<br>c.892C>A | p.Pro568Thr<br>;<br>p.Pro205Thr<br>;<br>p.Pro268Thr<br>;<br>p.Pro298Thr | 1   | FALSE | chr5:6759<br>1109:C:A  | 28:chr5:67<br>591109:C:<br>A  | 0.0016   |

|           |    |        |                    |                                                 |                                                                 |     |       |                        |                               |          |
|-----------|----|--------|--------------------|-------------------------------------------------|-----------------------------------------------------------------|-----|-------|------------------------|-------------------------------|----------|
| 26_c5-1   | 26 | TP53   | MODIFIER; MODERATE | c.-3G>T;<br>c.358G>T;<br>c.475G>T;<br>c.79G>T   | ; p.Ala120Ser;<br>p.Ala159Ser;<br>p.Ala27Ser                    | 23  | FALSE | chr17:757<br>8455:C:A  | 28:chr17:7<br>578455:C:<br>A  | 0.001805 |
| 26_c5-1   | 26 | ALK    | MODERATE           | c.3394G>A                                       | p.Glu1132Lys                                                    | 1   | FALSE | chr2:2944<br>5439:C:T  | 28:chr2:29<br>445439:C:<br>T  | 0.001825 |
| 26_c5-1   | 26 | TP53   | MODIFIER; MODERATE | c.-9G>T;<br>c.352G>T;<br>c.469G>T;<br>c.73G>T   | ; p.Val118Phe<br>; p.Val157Phe<br>; p.Val25Phe                  | 169 | FALSE | chr17:757<br>8461:C:A  | 28:chr17:7<br>578461:C:<br>A  | 0.0036   |
| 25_t2c4-1 | 25 | CTNNB1 | MODERATE           | c.122C>A                                        | p.Thr41Asn                                                      | 0   | FALSE | chr3:4126<br>6125:C:A  | 29:chr3:41<br>266125:C:<br>A  | 0.001034 |
| 25_t2c4-1 | 25 | GNA11  | MODERATE           | c.997G>A                                        | p.Asp333Asn                                                     | 1   | FALSE | chr19:312<br>1094:G:A  | 29:chr19:3<br>121094:G:<br>A  | 0.001013 |
| 25_t2c4-1 | 25 | PTEN   | MODERATE           | c.611C>A                                        | p.Pro204Gln                                                     | 3   | FALSE | chr10:897<br>11993:C:A | 29:chr10:8<br>9711993:C:<br>A | 0.001096 |
| 25_t2c4-1 | 25 | CTNNB1 | MODERATE           | c.86C>A                                         | p.Ser29Tyr                                                      | 0   | FALSE | chr3:4126<br>6089:C:A  | 29:chr3:41<br>266089:C:<br>A  | 0.001638 |
| 25_t2c4-1 | 25 | CTNNB1 | MODERATE           | c.96C>A                                         | p.Asp32Glu                                                      | 0   | FALSE | chr3:4126<br>6099:C:A  | 29:chr3:41<br>266099:C:<br>A  | 0.002128 |
| 25_t2c4-1 | 25 | TP53   | MODERATE           | c.355C>T;<br>c.436C>T;<br>c.715C>T;<br>c.832C>T | p.Pro119Ser;<br>; p.Pro146Ser<br>; p.Pro239Ser<br>; p.Pro278Ser | 59  | FALSE | chr17:757<br>7106:G:A  | 29:chr17:7<br>577106:G:<br>A  | 0.001559 |
| 25_t2c4-1 | 25 | BRAF   | MODERATE           | c.1330C>T                                       | p.Arg444Trp                                                     | 5   | FALSE | chr7:1404<br>81478:G:A | 29:chr7:14<br>0481478:G:<br>A | 0.001557 |
| 25_t2c4-1 | 25 | NF1    | HIGH               | c.5817C>A;<br>; c.5880C>A                       | p.Cys1939*;<br>p.Cys1960*                                       | 1   | FALSE | chr17:296<br>61923:C:A | 29:chr17:2<br>9661923:C:<br>A | 0.002596 |
| 25_t2c4-1 | 25 | EPHA3  | MODERATE           | c.1379C>A                                       | p.Pro460His                                                     | 0   | FALSE | chr3:8944<br>5059:C:A  | 29:chr3:89<br>445059:C:<br>A  | 0.001722 |
| 25_t2c4-1 | 25 | NF1    | MODERATE           | c.2695T>G                                       | p.Leu899Val                                                     | 3   | FALSE | chr17:295<br>56328:T:G | 29:chr17:2<br>9556328:T:<br>G | 0.056907 |

|           |    |                             |                    |                                                                                               |                                                          |       |       |                        |                               |          |
|-----------|----|-----------------------------|--------------------|-----------------------------------------------------------------------------------------------|----------------------------------------------------------|-------|-------|------------------------|-------------------------------|----------|
| 25_t2c4-1 | 25 | ERBB2;<br>MIEN1;<br>MIR4728 | MODERATE; MODIFIER | c.2236G>A<br>;<br>c.2281G>A<br>;<br>c.2326G>A<br>;<br>n.2650G>A<br>;<br>c.*388C>T;<br>n.-1G>A | p.Gly746Ser<br>;<br>p.Gly761Ser<br>;<br>p.Gly776Ser<br>; | 5     | FALSE | chr17:378<br>80997:G:A | 29:chr17:3<br>7880997:G<br>:A | 0.001078 |
| 25_t2c4-1 | 25 | MAP2K1                      | MODERATE           | c.198C>A                                                                                      | p.Asp66Glu                                               | 4     | FALSE | chr15:667<br>27482:C:A | 29:chr15:6<br>6727482:C<br>:A | 0.002346 |
| 25_t2c4-1 | 25 | PHLPP1                      | MODERATE           | c.2303C>A                                                                                     | p.Ser768Tyr                                              | 0     | FALSE | chr18:605<br>63103:C:A | 29:chr18:6<br>0563103:C<br>:A | 0.0016   |
| 25_t2c4-1 | 25 | EGFR                        | MODIFIER; MODERATE | c.*2133G><br>A;<br>c.*2364G><br>A;<br>c.2030G>A                                               | p.Arg677His<br>;                                         | 5     | FALSE | chr7:5524<br>0786:G:A  | 29:chr7:55<br>240786:G:<br>A  | 0.001992 |
| 25_t2c4-1 | 25 | BRAF                        | MODERATE           | c.2223G>T                                                                                     | p.Glu741As<br>p                                          | 1     | FALSE | chr7:1404<br>34475:C:A | 29:chr7:14<br>0434475:C<br>:A | 0.000882 |
| 25_t2c4-1 | 25 | RET                         | MODERATE           | c.1690A>C                                                                                     | p.Thr564Pro                                              | 1     | FALSE | chr10:436<br>08342:A:C | 29:chr10:4<br>3608342:A<br>:C | 0.015748 |
| 25_t2c4-1 | 25 | BRAF                        | MODERATE           | c.1799T>A                                                                                     | p.Val600Glu                                              | 23024 | FALSE | chr7:1404<br>53136:A:T | 29:chr7:14<br>0453136:A<br>:T | 0.002697 |
| 25_t2c4-1 | 25 | CTNNB1                      | MODERATE           | c.98C>A                                                                                       | p.Ser33Tyr                                               | 0     | FALSE | chr3:4126<br>6101:C:A  | 29:chr3:41<br>266101:C:<br>A  | 0.001047 |
| 25_t2c4-1 | 25 | PIK3CA                      | MODERATE           | c.518C>A                                                                                      | p.Ser173Tyr                                              | 1     | FALSE | chr3:1789<br>17643:C:A | 29:chr3:17<br>8917643:C<br>:A | 0.001033 |
| 25_t2c4-1 | 25 | PIK3R1                      | HIGH               | c.1077C>A<br>;<br>c.1167C>A<br>;<br>c.1977C>A<br>;<br>c.888C>A                                | p.Cys359*;<br>p.Cys389*;<br>p.Cys659*;<br>p.Cys296*      | 1     | FALSE | chr5:6759<br>2161:C:A  | 29:chr5:67<br>592161:C:<br>A  | 0.001161 |
| 25_t2c4-1 | 25 | PTEN                        | HIGH               | c.720C>A                                                                                      | p.Tyr240*                                                | 3     | FALSE | chr10:897<br>17695:C:A | 29:chr10:8<br>9717695:C<br>:A | 0.00213  |
| 25_t2c4-1 | 25 | NF1                         | MODERATE           | c.169G>A                                                                                      | p.Gly57Ser                                               | 1     | FALSE | chr17:294<br>83109:G:A | 29:chr17:2<br>9483109:G<br>:A | 0.001011 |
| 25_t2c4-1 | 25 | ALK                         | HIGH               | c.4414G>T                                                                                     | p.Glu1472*                                               | 1     | FALSE | chr2:2941<br>6539:C:A  | 29:chr2:29<br>416539:C:<br>A  | 0.000861 |
| 25_t2c4-1 | 25 | MET                         | HIGH               | c.1639C>T                                                                                     | p.Arg547*                                                | 2     | FALSE | chr7:1163<br>81017:C:T | 29:chr7:11<br>6381017:C<br>:T | 0.000834 |
| 25_t2c4-1 | 25 | PIK3CA                      | MODERATE           | c.112C>A                                                                                      | p.Arg38Ser                                               | 9     | FALSE | chr3:1789<br>16725:C:A | 29:chr3:17<br>8916725:C<br>:A | 0.001657 |



|           |    |                    |                    |                                                 |                                                   |    |       |                        |                               |          |
|-----------|----|--------------------|--------------------|-------------------------------------------------|---------------------------------------------------|----|-------|------------------------|-------------------------------|----------|
| 25_t2c4-1 | 25 | CTNNB1             | MODERATE           | c.884C>A                                        | p.Ala295Asp                                       | 0  | FALSE | chr3:4126<br>7300:C:A  | 29:chr3:41<br>267300:C:<br>A  | 0.00115  |
| 25_t2c4-1 | 25 | KIT                | MODERATE           | c.235C>A                                        | p.Gln79Lys                                        | 2  | FALSE | chr4:5556<br>1845:C:A  | 29:chr4:55<br>561845:C:<br>A  | 0.000872 |
| 25_t2c4-1 | 25 | KRAS               | HIGH               | c.292G>T                                        | p.Glu98*                                          | 1  | FALSE | chr12:253<br>78706:C:A | 29:chr12:2<br>5378706:C<br>:A | 0.001285 |
| 25_t2c4-1 | 25 | FGFR1              | MODIFIER; MODERATE | c.-85G>T;<br>c.107G>T;<br>c.8G>T                | ; p.Ser36Ile;<br>p.Ser3Ile                        | 1  | FALSE | chr8:3831<br>4957:C:A  | 29:chr8:38<br>314957:C:<br>A  | 0.001919 |
| 25_t2c4-1 | 25 | BRAF               | MODERATE           | c.1391G>T                                       | p.Gly464Val                                       | 9  | FALSE | chr7:1404<br>81417:C:A | 29:chr7:14<br>0481417:C<br>:A | 0.001032 |
| 25_t2c4-1 | 25 | CTNNB1             | MODERATE           | c.861C>A                                        | p.Asn287Lys                                       | 0  | FALSE | chr3:4126<br>7277:C:A  | 29:chr3:41<br>267277:C:<br>A  | 0.002259 |
| 25_t2c4-1 | 25 | ALK                | MODERATE           | c.2653G>T                                       | p.Asp885Tyr                                       | 2  | FALSE | chr2:2945<br>1912:C:A  | 29:chr2:29<br>451912:C:<br>A  | 0.001356 |
| 25_t2c4-1 | 25 | PIK3R1             | MODERATE           | c.825C>A                                        | p.Phe275Le<br>u                                   | 1  | FALSE | chr5:6757<br>6546:C:A  | 29:chr5:67<br>576546:C:<br>A  | 0.001095 |
| 25_t2c4-1 | 25 | HGF                | HIGH               | c.1993G>T<br>;<br>c.2008G>T                     | p.Glu665*;<br>p.Glu670*                           | 0  | FALSE | chr7:8133<br>4708:C:A  | 29:chr7:81<br>334708:C:<br>A  | 0.001131 |
| 25_t2c4-1 | 25 | MET                | MODERATE           | c.1234C>T                                       | p.Arg412Cys                                       | 1  | FALSE | chr7:1163<br>71755:C:T | 29:chr7:11<br>6371755:C<br>:T | 0.00144  |
| 25_t2c4-1 | 25 | DDR2               | MODERATE           | c.1234C>A                                       | p.Leu412Ile                                       | 1  | FALSE | chr1:1627<br>37090:C:A | 29:chr1:16<br>2737090:C<br>:A | 0.0014   |
| 25_t2c4-1 | 25 | HOXD-AS2;<br>HOXD8 | MODIFIER; MODERATE | n.*692G>T<br>;<br>c.22C>A;<br>c.574C>A          | ; p.Gln8Lys;<br>p.Gln192Lys                       | 0  | FALSE | chr2:1769<br>95668:C:A | 29:chr2:17<br>6995668:C<br>:A | 0.002201 |
| 25_t2c4-1 | 25 | CTNNB1             | MODERATE           | c.1127G>A                                       | p.Arg376His                                       | 0  | FALSE | chr3:4127<br>4877:G:A  | 29:chr3:41<br>274877:G:<br>A  | 0.000975 |
| 25_t2c4-1 | 25 | PIK3CA             | MODERATE           | c.1255C>A                                       | p.His419Asn                                       | 1  | FALSE | chr3:1789<br>27977:C:A | 29:chr3:17<br>8927977:C<br>:A | 0.001776 |
| 25_t2c4-1 | 25 | TP53               | HIGH               | c.115G>T;<br>c.196G>T;<br>c.475G>T;<br>c.592G>T | p.Glu39*;<br>p.Glu66*;<br>p.Glu159*;<br>p.Glu198* | 30 | FALSE | chr17:757<br>8257:C:A  | 29:chr17:7<br>578257:C:<br>A  | 0.001389 |

|           |    |                             |                    |                                                                                                                  |                                                             |    |       |                    |                       |          |
|-----------|----|-----------------------------|--------------------|------------------------------------------------------------------------------------------------------------------|-------------------------------------------------------------|----|-------|--------------------|-----------------------|----------|
| 25_t2c4-1 | 25 | ERBB2;<br>MIEN1;<br>MIR4728 | MODIFIER; MODERATE | c.3160-213A>G;<br>c.3251A>G<br>;<br>c.3296A>G<br>;<br>c.3341A>G<br>;<br>n.3665A>G<br>;<br>c.*388T>C;<br>n.*67A>G | p.Glu1084Gly;<br>p.Glu1099Gly;<br>p.Glu1114Gly              | 1  | FALSE | chr17:37883729:A:G | 29:chr17:37883729:A:G | 0.001274 |
| 25_t2c4-1 | 25 | TP53                        | MODERATE; MODIFIER | c.225G>T;<br>c.342G>T;<br>c.-279G>T;<br>c.-360G>T                                                                | p.Leu75Phe;<br>p.Leu114Phe;                                 | 2  | FALSE | chr17:7579345:C:A  | 29:chr17:7579345:C:A  | 0.001096 |
| 25_t2c4-1 | 25 | TP53                        | MODERATE           | c.371G>T;<br>c.452G>T;<br>c.731G>T;<br>c.848G>T                                                                  | p.Arg124Leu;<br>p.Arg151Leu;<br>p.Arg244Leu;<br>p.Arg283Leu | 24 | FALSE | chr17:7577090:C:A  | 29:chr17:7577090:C:A  | 0.00106  |
| 25_t2c4-1 | 25 | ZNF716                      | MODERATE           | c.260C>A                                                                                                         | p.Pro87Gln                                                  | 0  | FALSE | chr7:57522872:C:A  | 29:chr7:57522872:C:A  | 0.00104  |
| 25_t2c4-1 | 25 | RET                         | MODERATE           | c.2038G>A                                                                                                        | p.Ala680Thr                                                 | 1  | FALSE | chr10:43610086:G:A | 29:chr10:43610086:G:A | 0.001905 |
| 25_t2c4-1 | 25 | PIK3R1                      | MODERATE           | c.1064T>C;<br>c.1253T>C;<br>c.1343T>C;<br>c.2153T>C                                                              | p.Val355Ala;<br>p.Val418Ala;<br>p.Val448Ala;<br>p.Val718Ala | 1  | FALSE | chr5:67593407:T:C  | 29:chr5:67593407:T:C  | 0.0008   |
| 25_t2c4-1 | 25 | HGF                         | MODERATE           | c.5G>T                                                                                                           | p.Trp2Leu                                                   | 0  | FALSE | chr7:81399283:C:A  | 29:chr7:81399283:C:A  | 0.002647 |
| 25_t2c4-1 | 25 | AKT3                        | MODERATE           | c.825G>T                                                                                                         | p.Glu275Asp                                                 | 0  | FALSE | chr1:243727145:C:A | 29:chr1:243727145:C:A | 0.001297 |
| 25_t2c4-1 | 25 | MAP2K1                      | MODERATE           | c.323G>A                                                                                                         | p.Arg108Gln                                                 | 1  | FALSE | chr15:66729115:G:A | 29:chr15:66729115:G:A | 0.001034 |
| 25_t2c4-1 | 25 | CTNNB1                      | MODERATE           | c.134C>A                                                                                                         | p.Ser45Tyr                                                  | 0  | FALSE | chr3:41266137:C:A  | 29:chr3:41266137:C:A  | 0.001496 |
| 25_t2c4-1 | 25 | NF1                         | MODERATE           | c.2573C>A                                                                                                        | p.Ser858Tyr                                                 | 1  | FALSE | chr17:29556206:C:A | 29:chr17:29556206:C:A | 0.000944 |
| 61_c2-1   | 61 | PTEN                        | MODERATE           | c.731C>A                                                                                                         | p.Pro244His                                                 | 2  | FALSE | chr10:89717706:C:A | 30:chr10:89717706:C:A | 0.002155 |

|         |    |                             |                    |                                                                                               |                                                     |       |       |                        |                               |          |
|---------|----|-----------------------------|--------------------|-----------------------------------------------------------------------------------------------|-----------------------------------------------------|-------|-------|------------------------|-------------------------------|----------|
| 61_c2-1 | 61 | CTNNB1                      | MODERATE           | c.861C>A                                                                                      | p.Asn287Lys                                         | 0     | FALSE | chr3:4126<br>7277:C:A  | 30:chr3:41<br>267277:C:<br>A  | 0.001932 |
| 61_c2-1 | 61 | KLLN;<br>PTEN               | MODIFIER; MODERATE | c.-951C>A;<br>c.44G>T                                                                         | ; p.Arg15Ile                                        | 3     | FALSE | chr10:896<br>24270:G:T | 30:chr10:8<br>9624270:G<br>:T | 0.002347 |
| 61_c2-1 | 61 | RET                         | MODERATE           | c.1690A>C                                                                                     | p.Thr564Pro                                         | 1     | FALSE | chr10:436<br>08342:A:C | 30:chr10:4<br>3608342:A<br>:C | 0.009184 |
| 61_c2-1 | 61 | PTEN                        | MODERATE           | c.320A>C                                                                                      | p.Asp107Ala                                         | 2     | FALSE | chr10:896<br>92836:A:C | 30:chr10:8<br>9692836:A<br>:C | 0.002157 |
| 61_c2-1 | 61 | CTNNB1                      | MODERATE           | c.134C>A                                                                                      | p.Ser45Tyr                                          | 0     | FALSE | chr3:4126<br>6137:C:A  | 30:chr3:41<br>266137:C:<br>A  | 0.001706 |
| 61_c2-1 | 61 | NF1                         | MODERATE           | c.2695T>G                                                                                     | p.Leu899Val                                         | 3     | FALSE | chr17:295<br>56328:T:G | 30:chr17:2<br>9556328:T<br>:G | 0.03428  |
| 61_c2-1 | 61 | HOXD-AS2;<br>HOXD8          | MODIFIER; MODERATE | n.*692G>T<br>; c.22C>A;<br>c.574C>A                                                           | ; p.Gln8Lys;<br>p.Gln192Lys                         | 0     | FALSE | chr2:1769<br>95668:C:A | 30:chr2:17<br>6995668:C<br>:A | 0.002706 |
| 61_c2-1 | 61 | ERBB2;<br>MIEN1;<br>MIR4728 | MODERATE; MODIFIER | c.2597G>A<br>;<br>c.2642G>A<br>;<br>c.2687G>A<br>;<br>n.3011G>A<br>;<br>c.*388C>T;<br>n.-1G>A | p.Arg866His<br>;<br>p.Arg881His<br>;<br>p.Arg896His | 2     | FALSE | chr17:378<br>81617:G:A | 30:chr17:3<br>7881617:G<br>:A | 0.004008 |
| 69_c3-1 | 69 | DDR2                        | MODERATE           | c.700G>A                                                                                      | p.Asp234Asn                                         | 1     | FALSE | chr1:1627<br>29614:G:A | 33:chr1:16<br>2729614:G<br>:A | 0.001503 |
| 69_c3-1 | 69 | NF1                         | MODERATE           | c.2695T>G                                                                                     | p.Leu899Val                                         | 3     | FALSE | chr17:295<br>56328:T:G | 33:chr17:2<br>9556328:T<br>:G | 0.041384 |
| 69_c3-1 | 69 | BRAF                        | MODERATE           | c.1799T>A                                                                                     | p.Val600Glu                                         | 23024 | FALSE | chr7:1404<br>53136:A:T | 33:chr7:14<br>0453136:A<br>:T | 0.047383 |
| 69_c3-1 | 69 | PTEN                        | MODERATE           | c.283C>T                                                                                      | p.Pro95Ser                                          | 3     | FALSE | chr10:896<br>92799:C:T | 33:chr10:8<br>9692799:C<br>:T | 0.018644 |

|         |    |                             |                    |                                                                                                                                                                                                        |                                                                                                                      |    |       |                        |                                |          |
|---------|----|-----------------------------|--------------------|--------------------------------------------------------------------------------------------------------------------------------------------------------------------------------------------------------|----------------------------------------------------------------------------------------------------------------------|----|-------|------------------------|--------------------------------|----------|
| 69_c3-1 | 69 | FGFR1;<br>LETM2             | MODERATE; MODIFIER | c.1777T>G<br>;<br>c.1783T>G<br>;<br>c.2020T>G<br>;<br>c.2044T>G<br>;<br>c.2050T>G<br>;<br>c.2143T>G<br>;<br>c.*1406A><br>C;<br>c.*1423A><br>C;<br>c.*1553A><br>C;<br>c.*1567A><br>C;<br>c.*1638A><br>C | p.Trp593Gly<br>;<br>p.Trp595Gly<br>;<br>p.Trp674Gly<br>;<br>p.Trp682Gly<br>;<br>p.Trp684Gly<br>;<br>p.Trp715Gly<br>; | 1  | FALSE | chr8:3827<br>1806:A:C  | 33:chr8:38<br>271806:A:<br>C   | 0.00282  |
| 69_c3-1 | 69 | TP53                        | HIGH; MODIFIER     | c.181C>T;<br>c.298C>T;<br>c.-279C>T;<br>c.-360C>T                                                                                                                                                      | p.Gln61*;<br>p.Gln100*;                                                                                              | 16 | FALSE | chr17:757<br>9389:G:A  | 33:chr17:7<br>579389:G:<br>A   | 0.025692 |
| 69_c3-1 | 69 | ERBB2;<br>MIEN1;<br>MIR4728 | MODERATE; MODIFIER | c.2720A>G<br>;<br>c.2765A>G<br>;<br>c.2810A>G<br>;<br>n.3134A>G<br>;<br>c.*388T>C;<br>n.-1A>G                                                                                                          | p.Lys907Arg<br>;<br>p.Lys922Arg<br>;<br>p.Lys937Arg<br>;                                                             | 1  | FALSE | chr17:378<br>82044:A:G | 33:chr17:3<br>7882044:A:<br>:G | 0.002625 |
| 69_c3-1 | 69 | ALK                         | MODERATE           | c.3718T>G                                                                                                                                                                                              | p.Leu1240V<br>al                                                                                                     | 2  | FALSE | chr2:2943<br>6875:A:C  | 33:chr2:29<br>436875:A:<br>C   | 0.001565 |
| 69_c3-1 | 69 | EPHA3                       | MODERATE           | c.2002C>A                                                                                                                                                                                              | p.Leu668Me<br>t                                                                                                      | 0  | FALSE | chr3:8946<br>8468:C:A  | 33:chr3:89<br>468468:C:<br>A   | 0.001556 |
| 69_c3-1 | 69 | CTNNB1                      | MODERATE           | c.125C>A                                                                                                                                                                                               | p.Thr42Lys                                                                                                           | 0  | FALSE | chr3:4126<br>6128:C:A  | 33:chr3:41<br>266128:C:<br>A   | 0.001422 |
| 69_c3-1 | 69 | HGF                         | MODERATE           | c.6G>T                                                                                                                                                                                                 | p.Trp2Cys                                                                                                            | 0  | FALSE | chr7:8139<br>9282:C:A  | 33:chr7:81<br>399282:C:<br>A   | 0.001652 |
| 69_c3-1 | 69 | DDR2                        | MODERATE           | c.313C>A                                                                                                                                                                                               | p.Arg105Ser                                                                                                          | 2  | FALSE | chr1:1627<br>24541:C:A | 33:chr1:16<br>2724541:C:<br>:A | 0.001438 |

|         |    |        |                    |                                                   |                                              |   |       |                        |                               |          |
|---------|----|--------|--------------------|---------------------------------------------------|----------------------------------------------|---|-------|------------------------|-------------------------------|----------|
| 69_c3-1 | 69 | ERBB2  | MODERATE; MODIFIER | c.632C>T;<br>c.677C>T;<br>c.722C>T;<br>n.1046C>T  | p.Ala211Val;<br>p.Ala226Val;<br>p.Ala241Val; | 2 | FALSE | chr17:378<br>66417:C:T | 33:chr17:3<br>7866417:C<br>:T | 0.001461 |
| 69_c3-1 | 69 | ALG10  | MODERATE           | c.217A>G                                          | p.Ile73Val                                   | 0 | FALSE | chr12:341<br>76942:A:G | 33:chr12:3<br>4176942:A<br>:G | 0.002126 |
| 69_c3-1 | 69 | PIK3CA | MODERATE           | c.178C>A                                          | p.Gln60Lys                                   | 1 | FALSE | chr3:1789<br>16791:C:A | 33:chr3:17<br>8916791:C<br>:A | 0.001272 |
| 69_c3-1 | 69 | EGFR   | MODIFIER; MODERATE | c.*1464C><br>A;<br>c.1476C>A                      | ; ;<br>p.Ser492Arg                           | 4 | FALSE | chr7:5522<br>8009:C:A  | 33:chr7:55<br>228009:C:<br>A  | 0.002306 |
| 69_c3-1 | 69 | GNA11  | MODERATE           | c.440G>A                                          | p.Arg147His                                  | 1 | FALSE | chr19:311<br>3446:G:A  | 33:chr19:3<br>113446:G:<br>A  | 0.001515 |
| 69_c3-1 | 69 | PTEN   | MODERATE           | c.443C>A                                          | p.Ala148Glu                                  | 1 | FALSE | chr10:896<br>92959:C:A | 33:chr10:8<br>9692959:C<br>:A | 0.001761 |
| 69_c3-1 | 69 | KIT    | MODERATE           | c.1493G>A                                         | p.Gly498Asp                                  | 1 | FALSE | chr4:5559<br>2169:G:A  | 33:chr4:55<br>592169:G:<br>A  | 0.001646 |
| 69_c3-1 | 69 | FGFR1  | MODIFIER; MODERATE | c.-63G>T;<br>c.129G>T;<br>c.30G>T                 | ; ;<br>p.Trp43Cys;<br>p.Trp10Cys             | 1 | FALSE | chr8:3831<br>4935:C:A  | 33:chr8:38<br>314935:C:<br>A  | 0.001296 |
| 69_c3-1 | 69 | KIT    | MODERATE           | c.2374A>G<br>;<br>c.2386A>G                       | p.Arg792Gly<br>;<br>p.Arg796Gly              | 3 | FALSE | chr4:5559<br>9260:A:G  | 33:chr4:55<br>599260:A:<br>G  | 0.001843 |
| 69_c3-1 | 69 | RET    | MODERATE           | c.1690A>C                                         | p.Thr564Pro                                  | 1 | FALSE | chr10:436<br>08342:A:C | 33:chr10:4<br>3608342:A<br>:C | 0.004894 |
| 73_c2-1 | 73 | KIT    | MODERATE           | c.1978G>A<br>;<br>c.1990G>A                       | p.Gly660Arg<br>;<br>p.Gly664Arg              | 1 | FALSE | chr4:5559<br>4287:G:A  | 34:chr4:55<br>594287:G:<br>A  | 0.002714 |
| 73_c2-1 | 73 | TP53   | MODIFIER; MODERATE | c.-13G>T;<br>c.105G>T;<br>c.-279G>T;<br>c.-360G>T | ; ;<br>p.Leu35Phe                            | 2 | FALSE | chr17:757<br>9582:C:A  | 34:chr17:7<br>579582:C:<br>A  | 0.003442 |
| 73_c2-1 | 73 | PIK3CA | MODERATE           | c.365G>A                                          | p.Gly122Asp                                  | 2 | FALSE | chr3:1789<br>17490:G:A | 34:chr3:17<br>8917490:G<br>:A | 0.003077 |
| 73_c2-1 | 73 | CTNNB1 | MODERATE           | c.1166C>T                                         | p.Ser389Leu                                  | 0 | FALSE | chr3:4127<br>4916:C:T  | 34:chr3:41<br>274916:C:<br>T  | 0.002433 |
| 73_c2-1 | 73 | CTNNB1 | MODERATE           | c.1564G>A                                         | p.Ala522Thr                                  | 0 | FALSE | chr3:4127<br>5669:G:A  | 34:chr3:41<br>275669:G:<br>A  | 0.002656 |
| 73_c2-1 | 73 | PIK3CA | MODERATE           | c.1645G>A                                         | p.Asp549As<br>n                              | 4 | FALSE | chr3:1789<br>36103:G:A | 34:chr3:17<br>8936103:G<br>:A | 0.002937 |

|         |    |        |                    |                                                                                                 |                                                                         |      |       |                        |                               |          |
|---------|----|--------|--------------------|-------------------------------------------------------------------------------------------------|-------------------------------------------------------------------------|------|-------|------------------------|-------------------------------|----------|
| 73_c2-1 | 73 | TP53   | MODERATE           | c.116A>G;<br>c.35A>G;<br>c.395A>G;<br>c.512A>G                                                  | p.Glu39Gly;<br>p.Glu12Gly;<br>p.Glu132Gly<br>;<br>p.Glu171Gly           | 3    | FALSE | chr17:757<br>8418:T:C  | 34:chr17:7<br>578418:T:<br>C  | 0.00458  |
| 73_c2-1 | 73 | ROS1   | MODERATE           | c.5391G>T                                                                                       | p.Gln1797His                                                            | 1    | FALSE | chr6:1176<br>47553:C:A | 34:chr6:11<br>7647553:C<br>:A | 0.002581 |
| 73_c2-1 | 73 | DDR2   | MODERATE           | c.263A>G                                                                                        | p.Gln88Arg                                                              | 1    | FALSE | chr1:1627<br>24491:A:G | 34:chr1:16<br>2724491:A<br>:G | 0.00299  |
| 73_c2-1 | 73 | DDR2   | MODERATE           | c.1598C>A                                                                                       | p.Thr533Lys                                                             | 1    | FALSE | chr1:1627<br>41907:C:A | 34:chr1:16<br>2741907:C<br>:A | 0.002646 |
| 73_c2-1 | 73 | TP53   | MODIFIER; MODERATE | c.-30A>G;<br>c.331A>G;<br>c.448A>G;<br>c.52A>G                                                  | p.Thr111Ala<br>;<br>p.Thr150Ala<br>;<br>p.Thr18Ala                      | 1    | FALSE | chr17:757<br>8482:T:C  | 34:chr17:7<br>578482:T:<br>C  | 0.003063 |
| 73_c2-1 | 73 | NF1    | MODERATE           | c.2695T>G                                                                                       | p.Leu899Val                                                             | 3    | FALSE | chr17:295<br>56328:T:G | 34:chr17:2<br>9556328:T<br>:G | 0.050536 |
| 73_c2-1 | 73 | ALK    | MODERATE           | c.3911G>A                                                                                       | p.Gly1304Glu                                                            | 1    | FALSE | chr2:2943<br>0064:C:T  | 34:chr2:29<br>430064:C:<br>T  | 0.003472 |
| 73_bl-1 | 73 | TP53   | MODIFIER; MODERATE | c.*122G>A<br>;<br>c.*34G>A<br>;<br>c.1015G>A<br>;<br>c.538G>A<br>;<br>c.619G>A<br>;<br>c.898G>A | p.Glu339Lys<br>;<br>p.Glu180Lys<br>;<br>p.Glu207Lys<br>;<br>p.Glu300Lys | 18   | FALSE | chr17:757<br>4012:C:T  | 45:chr17:7<br>574012:C:<br>T  | 0.001408 |
| 73_bl-1 | 73 | EGFR   | MODERATE           | c.3235G>A                                                                                       | p.Glu1079Lys                                                            | 1    | FALSE | chr7:5527<br>0282:G:A  | 45:chr7:55<br>270282:G:<br>A  | 0.001569 |
| 73_bl-1 | 73 | TP53   | MODERATE           | c.152C>T;<br>c.431C>T;<br>c.548C>T;<br>c.71C>T                                                  | p.Ser51Leu;<br>p.Ser144Leu<br>;<br>p.Ser183Leu<br>;<br>p.Ser24Leu       | 26   | FALSE | chr17:757<br>8382:G:A  | 45:chr17:7<br>578382:G:<br>A  | 0.002306 |
| 73_bl-1 | 73 | PIK3CA | MODERATE           | c.1633G>A                                                                                       | p.Glu545Lys                                                             | 1189 | FALSE | chr3:1789<br>36091:G:A | 45:chr3:17<br>8936091:G<br>:A | 0.001808 |
| 73_bl-1 | 73 | EPHA3  | MODERATE           | c.1123C>T                                                                                       | p.Pro375Ser                                                             | 0    | FALSE | chr3:8939<br>1057:C:T  | 45:chr3:89<br>391057:C:<br>T  | 0.001481 |

|         |    |        |          |                                                                |                                                                         |    |       |                        |                               |          |
|---------|----|--------|----------|----------------------------------------------------------------|-------------------------------------------------------------------------|----|-------|------------------------|-------------------------------|----------|
| 73_bl-1 | 73 | CWH43  | MODERATE | c.112G>A;<br>c.31G>A                                           | p.Glu38Lys;<br>p.Glu11Lys                                               | 0  | FALSE | chr4:4899<br>0562:G:A  | 45:chr4:48<br>990562:G:<br>A  | 0.001641 |
| 73_bl-1 | 73 | NF1    | MODERATE | c.5602G>A<br>;<br>c.5665G>A                                    | p.Glu1868Lys<br>;<br>p.Glu1889Lys                                       | 1  | FALSE | chr17:296<br>57369:G:A | 45:chr17:2<br>9657369:G<br>:A | 0.00188  |
| 73_bl-1 | 73 | PIK3R1 | MODERATE | c.1147G>A<br>;<br>c.1237G>A<br>;<br>c.2047G>A<br>;<br>c.958G>A | p.Glu383Lys<br>;<br>p.Glu413Lys<br>;<br>p.Glu683Lys<br>;<br>p.Glu320Lys | 2  | FALSE | chr5:6759<br>3301:G:A  | 45:chr5:67<br>593301:G:<br>A  | 0.001526 |
| 73_bl-1 | 73 | BRAF   | MODERATE | c.1405G>A                                                      | p.Gly469Arg                                                             | 11 | FALSE | chr7:1404<br>81403:C:T | 45:chr7:14<br>0481403:C<br>:T | 0.001992 |
| 73_bl-1 | 73 | NF1    | MODERATE | c.7733C>T;<br>c.7796C>T                                        | p.Ser2578Phe<br>;<br>p.Ser2599Phe                                       | 1  | FALSE | chr17:296<br>84035:C:T | 45:chr17:2<br>9684035:C<br>:T | 0.001652 |
| 73_bl-1 | 73 | HGF    | HIGH     | c.1230G>A<br>;<br>c.1245G>A                                    | p.Trp410*;<br>p.Trp415*                                                 | 0  | FALSE | chr7:8135<br>0087:C:T  | 45:chr7:81<br>350087:C:<br>T  | 0.001963 |
| 73_bl-1 | 73 | BRAF   | MODERATE | c.305C>T                                                       | p.Ser102Phe                                                             | 1  | FALSE | chr7:1405<br>34608:G:A | 45:chr7:14<br>0534608:G<br>:A | 0.001608 |
| 73_bl-1 | 73 | PIK3CA | MODERATE | c.3052G>A                                                      | p.Asp1018Asn                                                            | 4  | FALSE | chr3:1789<br>51997:G:A | 45:chr3:17<br>8951997:G<br>:A | 0.001579 |
| 73_bl-1 | 73 | PIK3CA | MODERATE | c.115G>A                                                       | p.Glu39Lys                                                              | 7  | FALSE | chr3:1789<br>16728:G:A | 45:chr3:17<br>8916728:G<br>:A | 0.001549 |
| 73_bl-1 | 73 | PTEN   | MODERATE | c.389G>A                                                       | p.Arg130Gln                                                             | 89 | FALSE | chr10:896<br>92905:G:A | 45:chr10:8<br>9692905:G<br>:A | 0.00173  |
| 73_bl-1 | 73 | BRAF   | MODERATE | c.1406G>A                                                      | p.Gly469Glu                                                             | 38 | FALSE | chr7:1404<br>81402:C:T | 45:chr7:14<br>0481402:C<br>:T | 0.003033 |
| 73_bl-1 | 73 | CWH43  | MODERATE | c.731C>T;<br>c.812C>T                                          | p.Ser244Leu<br>;<br>p.Ser271Leu                                         | 0  | FALSE | chr4:4900<br>5761:C:T  | 45:chr4:49<br>005761:C:<br>T  | 0.001696 |
| 73_bl-1 | 73 | PTEN   | HIGH     | c.733C>T                                                       | p.Gln245*                                                               | 10 | FALSE | chr10:897<br>17708:C:T | 45:chr10:8<br>9717708:C<br>:T | 0.001984 |
| 73_bl-1 | 73 | BRAF   | HIGH     | c.1906C>T                                                      | p.Gln636*                                                               | 2  | FALSE | chr7:1404<br>49173:G:A | 45:chr7:14<br>0449173:G<br>:A | 0.001965 |
| 73_bl-1 | 73 | ALK    | MODERATE | c.2024C>T                                                      | p.Pro675Leu                                                             | 1  | FALSE | chr2:2949<br>7982:G:A  | 45:chr2:29<br>497982:G:<br>A  | 0.002191 |
| 73_bl-1 | 73 | BRAF   | MODERATE | c.1345G>A                                                      | p.Asp449Asn                                                             | 1  | FALSE | chr7:1404<br>81463:C:T | 45:chr7:14<br>0481463:C<br>:T | 0.001711 |
| 73_bl-1 | 73 | NF1    | MODERATE | c.8070G>T<br>;<br>c.8133G>T                                    | p.Leu2690Phe<br>;<br>p.Leu2711Phe                                       | 1  | FALSE | chr17:296<br>86006:G:T | 45:chr17:2<br>9686006:G<br>:T | 0.009074 |

|         |    |                    |                    |                                                    |                                                              |     |       |                        |                               |          |
|---------|----|--------------------|--------------------|----------------------------------------------------|--------------------------------------------------------------|-----|-------|------------------------|-------------------------------|----------|
| 73_bl-1 | 73 | HOXD-AS2;<br>HOXD8 | MODIFIER; MODERATE | n.*692C>T;<br>; c.304G>A;<br>c.853G>A;<br>c.856G>A | p.Glu102Lys;<br>; p.Glu285Lys;<br>; p.Glu286Lys              | 0   | FALSE | chr2:1769<br>96323:G:A | 45:chr2:17<br>6996323:G<br>:A | 0.001544 |
| 73_bl-1 | 73 | TP53               | MODERATE           | c.257G>A;<br>c.338G>A;<br>c.617G>A;<br>c.734G>A    | p.Gly86Asp;<br>p.Gly113Asp<br>; p.Gly206Asp<br>; p.Gly245Asp | 126 | FALSE | chr17:757<br>7547:C:T  | 45:chr17:7<br>577547:C:<br>T  | 0.001661 |
| 73_bl-1 | 73 | TP53               | MODIFIER; MODERATE | c.-9G>T;<br>c.352G>T;<br>c.469G>T;<br>c.73G>T      | p.Val118Phe<br>; p.Val157Phe<br>; p.Val25Phe                 | 169 | FALSE | chr17:757<br>8461:C:A  | 45:chr17:7<br>578461:C:<br>A  | 0.001753 |
| 73_bl-1 | 73 | KIT                | MODERATE           | c.217G>A                                           | p.Glu73Lys                                                   | 1   | FALSE | chr4:5556<br>1827:G:A  | 45:chr4:55<br>561827:G:<br>A  | 0.001474 |
| 73_bl-1 | 73 | EPHA3              | MODERATE           | c.1142G>A                                          | p.Arg381His                                                  | 0   | FALSE | chr3:8939<br>1076:G:A  | 45:chr3:89<br>391076:G:<br>A  | 0.00149  |
| 73_bl-1 | 73 | NF1                | MODERATE           | c.5294C>T;<br>c.5357C>T                            | p.Ser1765Le<br>u;<br>p.Ser1786Le<br>u                        | 1   | FALSE | chr17:296<br>54605:C:T | 45:chr17:2<br>9654605:C<br>:T | 0.001616 |
| 73_bl-1 | 73 | EGFR               | MODERATE           | c.719G>A                                           | p.Cys240Tyr                                                  | 1   | FALSE | chr7:5522<br>0329:G:A  | 45:chr7:55<br>220329:G:<br>A  | 0.002392 |
| 73_bl-1 | 73 | NF1                | MODERATE           | c.2614G>A                                          | p.Glu872Lys                                                  | 1   | FALSE | chr17:295<br>56247:G:A | 45:chr17:2<br>9556247:G<br>:A | 0.002299 |
| 73_bl-1 | 73 | CTNNB1             | MODERATE           | c.163G>A                                           | p.Glu55Lys                                                   | 0   | FALSE | chr3:4126<br>6166:G:A  | 45:chr3:41<br>266166:G:<br>A  | 0.001591 |
| 73_bl-1 | 73 | BRAF               | MODERATE           | c.1385G>A                                          | p.Arg462Lys                                                  | 2   | FALSE | chr7:1404<br>81423:C:T | 45:chr7:14<br>0481423:C<br>:T | 0.002742 |
| 73_bl-1 | 73 | CTNNB1             | MODERATE           | c.96C>A                                            | p.Asp32Glu                                                   | 0   | FALSE | chr3:4126<br>6099:C:A  | 45:chr3:41<br>266099:C:<br>A  | 0.001721 |
| 73_bl-1 | 73 | KLLN;<br>PTEN      | MODIFIER; MODERATE | c.-951C>T;<br>c.32G>A                              | p.Arg11Lys                                                   | 1   | FALSE | chr10:896<br>24258:G:A | 45:chr10:8<br>9624258:G<br>:A | 0.002786 |
| 73_bl-1 | 73 | NF1                | HIGH               | c.5817C>A<br>; c.5880C>A                           | p.Cys1939*;<br>p.Cys1960*                                    | 1   | FALSE | chr17:296<br>61923:C:A | 45:chr17:2<br>9661923:C<br>:A | 0.002445 |
| 73_bl-1 | 73 | ALK                | MODERATE           | c.4280C>T                                          | p.Ser1427Ph<br>e                                             | 2   | FALSE | chr2:2941<br>6673:G:A  | 45:chr2:29<br>416673:G:<br>A  | 0.001969 |
| 73_bl-1 | 73 | EPHA3              | HIGH               | c.406C>T                                           | p.Arg136*                                                    | 0   | FALSE | chr3:8925<br>9262:C:T  | 45:chr3:89<br>259262:C:<br>T  | 0.001667 |



|         |    |                 |                    |                                                                                                   |                                      |    |       |                        |                               |          |
|---------|----|-----------------|--------------------|---------------------------------------------------------------------------------------------------|--------------------------------------|----|-------|------------------------|-------------------------------|----------|
| 73_bl-1 | 73 | EGFR            | MODERATE           | c.844G>A                                                                                          | p.Glu282Lys                          | 1  | FALSE | chr7:5522<br>1800:G:A  | 45:chr7:55<br>221800:G:<br>A  | 0.001457 |
| 73_bl-1 | 73 | NF1             | HIGH               | c.1105C>T                                                                                         | p.Gln369*                            | 2  | FALSE | chr17:295<br>28097:C:T | 45:chr17:2<br>9528097:C<br>:T | 0.004535 |
| 73_bl-1 | 73 | GAPDH;<br>IFFO1 | MODERATE; MODIFIER | c.503C>T;<br>c.629C>T;<br>c.*1743G><br>A;<br>c.*1746G><br>A;<br>c.*1770G><br>A;<br>n.*2798G><br>A | p.Ser168Phe<br>;<br>p.Ser210Phe<br>; | 0  | FALSE | chr12:664<br>6853:C:T  | 45:chr12:6<br>646853:C:<br>T  | 0.002028 |
| 73_bl-1 | 73 | PTEN            | HIGH               | c.511C>T                                                                                          | p.Gln171*                            | 13 | FALSE | chr10:897<br>11893:C:T | 45:chr10:8<br>9711893:C<br>:T | 0.002132 |
| 73_bl-1 | 73 | EPHA3           | MODERATE           | c.311G>A                                                                                          | p.Arg104Gln                          | 0  | FALSE | chr3:8925<br>9167:G:A  | 45:chr3:89<br>259167:G:<br>A  | 0.001627 |
| 73_bl-1 | 73 | HGF             | HIGH               | c.526C>T;<br>c.541C>T                                                                             | p.Arg176*;<br>p.Arg181*              | 0  | FALSE | chr7:8138<br>1520:G:A  | 45:chr7:81<br>381520:G:<br>A  | 0.001552 |
| 73_bl-1 | 73 | MET             | MODERATE           | c.2980G>A<br>;<br>c.3034G>A                                                                       | p.Glu994Lys<br>;<br>p.Glu1012Ly<br>s | 1  | FALSE | chr7:1164<br>11995:G:A | 45:chr7:11<br>6411995:G<br>:A | 0.00172  |
| 73_bl-1 | 73 | TP53            | MODERATE; MODIFIER | c.254G>A;<br>c.371G>A;<br>c.-279G>A;<br>c.-360G>A                                                 | p.Cys85Tyr;<br>p.Cys124Tyr<br>;      | 3  | FALSE | chr17:757<br>9316:C:T  | 45:chr17:7<br>579316:C:<br>T  | 0.001805 |
| 73_bl-1 | 73 | CWH43           | MODERATE           | c.415G>A;<br>c.496G>A                                                                             | p.Asp139As<br>n;<br>p.Asp166As<br>n  | 0  | FALSE | chr4:4899<br>4092:G:A  | 45:chr4:48<br>994092:G:<br>A  | 0.002215 |
| 73_bl-1 | 73 | CTNNB1          | MODERATE           | c.125C>A                                                                                          | p.Thr42Lys                           | 0  | FALSE | chr3:4126<br>6128:C:A  | 45:chr3:41<br>266128:C:<br>A  | 0.001661 |
| 73_bl-1 | 73 | PIK3CA          | MODERATE           | c.277C>T                                                                                          | p.Arg93Trp                           | 24 | FALSE | chr3:1789<br>16890:C:T | 45:chr3:17<br>8916890:C<br>:T | 0.0016   |
| 73_bl-1 | 73 | NF1             | MODIFIER; HIGH     | c.*2165G><br>A;<br>c.2088G>A                                                                      | ; p.Trp696*                          | 1  | FALSE | chr17:295<br>53539:G:A | 45:chr17:2<br>9553539:G<br>:A | 0.001726 |
| 73_bl-1 | 73 | PIK3CA          | MODERATE           | c.56G>A                                                                                           | p.Arg19Lys                           | 1  | FALSE | chr3:1789<br>16669:G:A | 45:chr3:17<br>8916669:G<br>:A | 0.001581 |
| 73_bl-1 | 73 | PTEN            | MODERATE           | c.424C>T                                                                                          | p.Arg142Trp                          | 6  | FALSE | chr10:896<br>92940:C:T | 45:chr10:8<br>9692940:C<br>:T | 0.001779 |
| 73_bl-1 | 73 | EPHA3           | MODERATE           | c.1916G>A                                                                                         | p.Arg639His                          | 0  | FALSE | chr3:8946<br>8382:G:A  | 45:chr3:89<br>468382:G:<br>A  | 0.002225 |

|         |    |        |                    |                                                         |                                                   |     |       |                        |                               |          |
|---------|----|--------|--------------------|---------------------------------------------------------|---------------------------------------------------|-----|-------|------------------------|-------------------------------|----------|
| 73_bl-1 | 73 | CTNNB1 | MODERATE           | c.160G>A                                                | p.Glu54Lys                                        | 0   | FALSE | chr3:4126<br>6163:G:A  | 45:chr3:41<br>266163:G:<br>A  | 0.001584 |
| 49_c4-1 | 49 | TP53   | MODIFIER; MODERATE | c.-3G>T;<br>c.358G>T;<br>c.475G>T;<br>c.79G>T           | ; p.Ala120Ser;<br>p.Ala159Ser;<br>p.Ala27Ser      | 23  | FALSE | chr17:757<br>8455:C:A  | 46:chr17:7<br>578455:C:<br>A  | 0.002209 |
| 49_c4-1 | 49 | EGFR   | MODERATE           | c.1159C>A                                               | p.Leu387Me<br>t                                   | 1   | FALSE | chr7:5522<br>4477:C:A  | 46:chr7:55<br>224477:C:<br>A  | 0.000884 |
| 49_c4-1 | 49 | PIK3R1 | MODERATE           | c.902G>A                                                | p.Arg301Gln                                       | 2   | FALSE | chr5:6757<br>6820:G:A  | 46:chr5:67<br>576820:G:<br>A  | 0.001051 |
| 49_c4-1 | 49 | BRAF   | MODERATE           | c.1202C>T                                               | p.Thr401Ile                                       | 1   | FALSE | chr7:1404<br>82933:G:A | 46:chr7:14<br>0482933:G<br>:A | 0.00136  |
| 49_c4-1 | 49 | ALK    | MODERATE           | c.3455T>C                                               | p.Leu1152Pr<br>o                                  | 1   | FALSE | chr2:2944<br>5270:A:G  | 46:chr2:29<br>445270:A:<br>G  | 0.001611 |
| 49_c4-1 | 49 | NF1    | HIGH               | c.5817C>A<br>;<br>c.5880C>A                             | p.Cys1939*;<br>p.Cys1960*                         | 1   | FALSE | chr17:296<br>61923:C:A | 46:chr17:2<br>9661923:C<br>:A | 0.001206 |
| 49_c4-1 | 49 | ROS1   | MODERATE           | c.5651G>T                                               | p.Arg1884I<br>l                                   | 1   | FALSE | chr6:1176<br>42548:C:A | 46:chr6:11<br>7642548:C<br>:A | 0.001009 |
| 49_c4-1 | 49 | FGFR1  | MODIFIER; MODERATE | c.92-<br>1373C>T;<br>c.208C>T;<br>c.232C>T;<br>c.331C>T | ; p.Arg70Cys;<br>p.Arg78Cys;<br>p.Arg111Cys       | 1   | FALSE | chr8:3828<br>7326:G:A  | 46:chr8:38<br>287326:G:<br>A  | 0.000926 |
| 49_c4-1 | 49 | TP53   | MODIFIER; MODERATE | c.-9G>T;<br>c.352G>T;<br>c.469G>T;<br>c.73G>T           | ; p.Val118Phe<br>;<br>p.Val157Phe<br>; p.Val25Phe | 169 | FALSE | chr17:757<br>8461:C:A  | 46:chr17:7<br>578461:C:<br>A  | 0.002775 |
| 49_c4-1 | 49 | DDR2   | MODERATE           | c.313C>A                                                | p.Arg105Ser                                       | 2   | FALSE | chr1:1627<br>24541:C:A | 46:chr1:16<br>2724541:C<br>:A | 0.002226 |
| 49_c4-1 | 49 | CWH43  | MODERATE           | c.1972G>A<br>;<br>c.2053G>A                             | p.Glu658Lys<br>;<br>p.Glu685Lys                   | 0   | FALSE | chr4:4906<br>3860:G:A  | 46:chr4:49<br>063860:G:<br>A  | 0.001064 |
| 49_c4-1 | 49 | TP53   | HIGH               | c.109C>T;<br>c.190C>T;<br>c.469C>T;<br>c.586C>T         | p.Arg37*;<br>p.Arg64*;<br>p.Arg157*;<br>p.Arg196* | 191 | FALSE | chr17:757<br>8263:G:A  | 46:chr17:7<br>578263:G:<br>A  | 0.000844 |
| 49_c4-1 | 49 | KRAS   | HIGH               | c.292G>T                                                | p.Glu98*                                          | 1   | FALSE | chr12:253<br>78706:C:A | 46:chr12:2<br>5378706:C<br>:A | 0.001139 |

|         |    |        |                    |                                                 |                                                              |    |       |                        |                               |          |
|---------|----|--------|--------------------|-------------------------------------------------|--------------------------------------------------------------|----|-------|------------------------|-------------------------------|----------|
| 49_c4-1 | 49 | PIK3CA | MODERATE           | c.478C>A                                        | p.His160Asn                                                  | 1  | FALSE | chr3:1789<br>17603:C:A | 46:chr3:17<br>8917603:C<br>:A | 0.002195 |
| 49_c4-1 | 49 | TP53   | MODERATE           | c.234G>T;<br>c.315G>T;<br>c.594G>T;<br>c.711G>T | p.Met78Ile;<br>p.Met105Ile<br>; p.Met198Ile<br>; p.Met237Ile | 81 | FALSE | chr17:757<br>7570:C:A  | 46:chr17:7<br>577570:C:<br>A  | 0.001465 |
| 49_c4-1 | 49 | PTEN   | MODERATE           | c.729C>A                                        | p.Phe243Leu                                                  | 1  | FALSE | chr10:897<br>17704:C:A | 46:chr10:8<br>9717704:C<br>:A | 0.000996 |
| 49_c4-1 | 49 | TP53   | MODERATE           | c.127C>T;<br>c.208C>T;<br>c.487C>T;<br>c.604C>T | p.Arg43Cys;<br>p.Arg70Cys;<br>p.Arg163Cys<br>; p.Arg202Cys   | 6  | FALSE | chr17:757<br>8245:G:A  | 46:chr17:7<br>578245:G:<br>A  | 0.000853 |
| 49_c4-1 | 49 | ALK    | MODERATE           | c.4192C>T                                       | p.Pro1398Ser                                                 | 1  | FALSE | chr2:2941<br>6761:G:A  | 46:chr2:29<br>416761:G:<br>A  | 0.001008 |
| 49_c4-1 | 49 | FGFR1  | MODIFIER; MODERATE | c.-85G>T;<br>c.107G>T;<br>c.8G>T                | ; p.Ser36Ile;<br>p.Ser3Ile                                   | 1  | FALSE | chr8:3831<br>4957:C:A  | 46:chr8:38<br>314957:C:<br>A  | 0.000898 |
| 49_c4-1 | 49 | MET    | MODERATE           | c.1640G>A                                       | p.Arg547Gln                                                  | 1  | FALSE | chr7:1163<br>81018:G:A | 46:chr7:11<br>6381018:G<br>:A | 0.000835 |
| 49_c4-1 | 49 | MET    | MODERATE           | c.487T>C                                        | p.Ser163Pro                                                  | 1  | FALSE | chr7:1163<br>39625:T:C | 46:chr7:11<br>6339625:T<br>:C | 0.001178 |
| 49_c4-1 | 49 | ERBB2  | MODERATE; MODIFIER | c.322C>T;<br>c.367C>T;<br>c.412C>T;<br>n.736C>T | p.Arg108Trp<br>;<br>p.Arg123Trp<br>;<br>p.Arg138Trp<br>;     | 1  | FALSE | chr17:378<br>64760:C:T | 46:chr17:3<br>7864760:C<br>:T | 0.000804 |
| 49_c4-1 | 49 | HGF    | MODERATE           | c.808G>T;<br>c.823G>T                           | p.Asp270Tyr<br>;<br>p.Asp275Tyr                              | 0  | FALSE | chr7:8137<br>2711:C:A  | 46:chr7:81<br>372711:C:<br>A  | 0.001049 |
| 49_c4-1 | 49 | NF1    | MODERATE           | c.4321C>T;<br>c.4384C>T                         | p.Arg1441Trp;<br>p.Arg1462Trp                                | 1  | FALSE | chr17:295<br>86101:C:T | 46:chr17:2<br>9586101:C<br>:T | 0.000937 |
| 49_c4-1 | 49 | BRAF   | MODERATE           | c.386C>T                                        | p.Ser129Leu                                                  | 2  | FALSE | chr7:1405<br>34527:G:A | 46:chr7:14<br>0534527:G<br>:A | 0.000802 |
| 49_c4-1 | 49 | PTEN   | MODERATE           | c.392C>A                                        | p.Thr131Asn                                                  | 2  | FALSE | chr10:896<br>92908:C:A | 46:chr10:8<br>9692908:C<br>:A | 0.001783 |
| 49_c4-1 | 49 | HGF    | MODERATE           | c.5G>T                                          | p.Trp2Leu                                                    | 0  | FALSE | chr7:8139<br>9283:C:A  | 46:chr7:81<br>399283:C:<br>A  | 0.000977 |

|         |    |                   |                    |                                                                              |                                                                                             |       |       |                    |                       |          |
|---------|----|-------------------|--------------------|------------------------------------------------------------------------------|---------------------------------------------------------------------------------------------|-------|-------|--------------------|-----------------------|----------|
| 49_c4-1 | 49 | RET               | MODERATE           | c.1799G>A                                                                    | p.Arg600Gln                                                                                 | 1     | FALSE | chr10:43609043:G:A | 46:chr10:43609043:G:A | 0.001303 |
| 49_c4-1 | 49 | CTNNB1            | MODERATE           | c.884C>A                                                                     | p.Ala295Asp                                                                                 | 0     | FALSE | chr3:41267300:C:A  | 46:chr3:41267300:C:A  | 0.001897 |
| 49_c4-1 | 49 | KIT               | MODERATE           | c.1485C>A                                                                    | p.Asn495Lys                                                                                 | 1     | FALSE | chr4:55592161:C:A  | 46:chr4:55592161:C:A  | 0.001007 |
| 49_c4-1 | 49 | EGFR;<br>EGFR-AS1 | MODERATE; MODIFIER | c.2527G>A<br>; n.-1C>T                                                       | p.Val843Ile;                                                                                | 6     | FALSE | chr7:55259469:G:A  | 46:chr7:55259469:G:A  | 0.001217 |
| 49_c4-1 | 49 | ALK               | MODERATE           | c.619G>A                                                                     | p.Ala207Thr                                                                                 | 1     | FALSE | chr2:30142907:C:T  | 46:chr2:30142907:C:T  | 0.00144  |
| 49_c4-1 | 49 | AKT3              | MODERATE           | c.44G>T                                                                      | p.Arg15Met                                                                                  | 0     | FALSE | chr1:244006429:C:A | 46:chr1:244006429:C:A | 0.001088 |
| 49_c4-1 | 49 | KRAS              | MODERATE           | c.35G>A                                                                      | p.Gly12Asp                                                                                  | 11213 | FALSE | chr12:25398284:C:T | 46:chr12:25398284:C:T | 0.001416 |
| 49_c4-1 | 49 | KRAS              | MODERATE           | c.218G>T                                                                     | p.Arg73Met                                                                                  | 1     | FALSE | chr12:25380240:C:A | 46:chr12:25380240:C:A | 0.000878 |
| 49_c4-1 | 49 | TP53              | MODIFIER; MODERATE | c.-17G>T;<br>c.344G>T;<br>c.461G>T;<br>c.65G>T                               | p.Gly115Val;<br>p.Gly154Val;<br>p.Gly22Val                                                  | 39    | FALSE | chr17:7578469:C:A  | 46:chr17:7578469:C:A  | 0.001117 |
| 49_c4-1 | 49 | FGFR1             | MODERATE           | c.1013C>T;<br>c.1019C>T;<br>c.1112C>T;<br>c.746C>T;<br>c.752C>T;<br>c.995C>T | p.Thr338Met;<br>p.Thr340Met;<br>p.Thr371Met;<br>p.Thr249Met;<br>p.Thr251Met;<br>p.Thr332Met | 2     | FALSE | chr8:38279377:G:A  | 46:chr8:38279377:G:A  | 0.001534 |
| 49_c4-1 | 49 | CTNNB1            | MODERATE           | c.1972G>T                                                                    | p.Val658Phe                                                                                 | 0     | FALSE | chr3:41278096:G:T  | 46:chr3:41278096:G:T  | 0.002271 |
| 49_c4-1 | 49 | FGFR1             | MODERATE           | c.475C>T;<br>c.481C>T;<br>c.724C>T;<br>c.742C>T;<br>c.748C>T;<br>c.841C>T    | p.Arg159Trp;<br>p.Arg161Trp;<br>p.Arg242Trp;<br>p.Arg248Trp;<br>p.Arg250Trp;<br>p.Arg281Trp | 2     | FALSE | chr8:38282215:G:A  | 46:chr8:38282215:G:A  | 0.000904 |
| 49_c4-1 | 49 | EPHA3             | MODERATE           | c.237C>A                                                                     | p.Asn79Lys                                                                                  | 0     | FALSE | chr3:89259093:C:A  | 46:chr3:89259093:C:A  | 0.001363 |

|         |    |        |                            |                                                   |                                                                         |     |       |                        |                               |          |
|---------|----|--------|----------------------------|---------------------------------------------------|-------------------------------------------------------------------------|-----|-------|------------------------|-------------------------------|----------|
| 49_c4-1 | 49 | PTEN   | MODERATE                   | c.443C>A                                          | p.Ala148Glu                                                             | 1   | FALSE | chr10:896<br>92959:C:A | 46:chr10:8<br>9692959:C<br>:A | 0.001013 |
| 49_c4-1 | 49 | TP53   | MODERATE; MODIFIER         | c.134C>T;<br>c.251C>T;<br>c.-279C>T;<br>c.-360C>T | p.Ala45Val;<br>p.Ala84Val;                                              | 4   | FALSE | chr17:757<br>9436:G:A  | 46:chr17:7<br>579436:G:<br>A  | 0.00126  |
| 49_c4-1 | 49 | EPHA3  | MODERATE                   | c.934C>T                                          | p.Arg312Trp                                                             | 0   | FALSE | chr3:8939<br>0185:C:T  | 46:chr3:89<br>390185:C:<br>T  | 0.000909 |
| 49_c4-1 | 49 | PTEN   | HIGH                       | c.720C>A                                          | p.Tyr240*                                                               | 3   | FALSE | chr10:897<br>17695:C:A | 46:chr10:8<br>9717695:C<br>:A | 0.000971 |
| 49_c4-1 | 49 | TP53   | HIGH                       | c.439C>T;<br>c.520C>T;<br>c.799C>T;<br>c.916C>T   | p.Arg147*;<br>p.Arg174*;<br>p.Arg267*;<br>p.Arg306*                     | 167 | FALSE | chr17:757<br>7022:G:A  | 46:chr17:7<br>577022:G:<br>A  | 0.000886 |
| 49_c4-1 | 49 | PIK3CA | MODERATE                   | c.518C>A                                          | p.Ser173Tyr                                                             | 1   | FALSE | chr3:1789<br>17643:C:A | 46:chr3:17<br>8917643:C<br>:A | 0.001351 |
| 49_c4-1 | 49 | EGFR   | MODERATE                   | c.442G>A                                          | p.Val148Met                                                             | 1   | FALSE | chr7:5521<br>4316:G:A  | 46:chr7:55<br>214316:G:<br>A  | 0.001807 |
| 68_c3-2 | 68 | RAC1   | MODERATE                   | c.203G>A                                          | p.Arg68His                                                              | 0   | FALSE | chr7:6431<br>650:G:A   | 47:chr7:64<br>31650:G:A       | 0.001008 |
| 68_c3-2 | 68 | TP53   | LOW; MODIFIER;<br>MODERATE | c.-6C>T;<br>c.355C>T;<br>c.472C>T;<br>c.76C>T     | p.Arg119Cys<br>;<br>p.Arg158Cys<br>;<br>p.Arg26Cys                      | 17  | FALSE | chr17:757<br>8458:G:A  | 47:chr17:7<br>578458:G:<br>A  | 0.002717 |
| 68_c3-2 | 68 | EGFR   | MODERATE                   | c.3352G>A                                         | p.Ala1118Thr                                                            | 3   | FALSE | chr7:5527<br>3029:G:A  | 47:chr7:55<br>273029:G:<br>A  | 0.000809 |
| 68_c3-2 | 68 | TP53   | MODERATE                   | c.338T>A;<br>c.419T>A;<br>c.698T>A;<br>c.815T>A   | p.Val113Glu<br>;<br>p.Val140Glu<br>;<br>p.Val233Glu<br>;<br>p.Val272Glu | 9   | FALSE | chr17:757<br>7123:A:T  | 47:chr17:7<br>577123:A:<br>T  | 0.001151 |
| 68_c3-2 | 68 | TP53   | MODIFIER; MODERATE         | c.-3G>T;<br>c.358G>T;<br>c.475G>T;<br>c.79G>T     | p.Ala120Ser;<br>p.Ala159Ser;<br>p.Ala27Ser                              | 23  | FALSE | chr17:757<br>8455:C:A  | 47:chr17:7<br>578455:C:<br>A  | 0.001335 |
| 68_c3-2 | 68 | PTEN   | MODERATE                   | c.421C>A                                          | p.His141Asn                                                             | 2   | FALSE | chr10:896<br>92937:C:A | 47:chr10:8<br>9692937:C<br>:A | 0.001013 |

|         |    |        |          |                                                    |                                                               |     |       |                        |                               |          |
|---------|----|--------|----------|----------------------------------------------------|---------------------------------------------------------------|-----|-------|------------------------|-------------------------------|----------|
| 68_c3-2 | 68 | TP53   | MODERATE | c.119T>G;<br>c.38T>G;<br>c.398T>G;<br>c.515T>G     | p.Val40Gly;<br>p.Val13Gly;<br>p.Val133Gly;<br>p.Val172Gly     | 12  | FALSE | chr17:757<br>8415:A:C  | 47:chr17:7<br>578415:A:<br>C  | 0.001283 |
| 68_c3-2 | 68 | PIK3CA | MODERATE | c.178C>A                                           | p.Gln60Lys                                                    | 1   | FALSE | chr3:1789<br>16791:C:A | 47:chr3:17<br>8916791:C<br>:A | 0.000727 |
| 68_c3-2 | 68 | PTEN   | MODERATE | c.506C>A                                           | p.Pro169His                                                   | 1   | FALSE | chr10:897<br>11888:C:A | 47:chr10:8<br>9711888:C<br>:A | 0.00111  |
| 68_c3-2 | 68 | TP53   | MODERATE | c.128G>A;<br>c.407G>A;<br>c.47G>A;<br>c.524G>A     | p.Arg43His;<br>p.Arg136His<br>;<br>p.Arg16His;<br>p.Arg175His | 979 | FALSE | chr17:757<br>8406:C:T  | 47:chr17:7<br>578406:C:<br>T  | 0.001262 |
| 68_c3-2 | 68 | CTNNB1 | MODERATE | c.134C>A                                           | p.Ser45Tyr                                                    | 0   | FALSE | chr3:4126<br>6137:C:A  | 47:chr3:41<br>266137:C:<br>A  | 0.001453 |
| 68_c3-2 | 68 | EPHA3  | HIGH     | c.1515C>A                                          | p.Tyr505*                                                     | 0   | FALSE | chr3:8944<br>8551:C:A  | 47:chr3:89<br>448551:C:<br>A  | 0.001684 |
| 68_c3-2 | 68 | PIK3R1 | MODERATE | c.1145C>T;<br>c.1235C>T;<br>c.2045C>T;<br>c.956C>T | p.Ala382Val;<br>p.Ala412Val;<br>p.Ala682Val;<br>p.Ala319Val   | 2   | FALSE | chr5:6759<br>3299:C:T  | 47:chr5:67<br>593299:C:<br>T  | 0.001158 |
| 68_c3-2 | 68 | PIK3CA | MODERATE | c.1624G>A                                          | p.Glu542Lys                                                   | 777 | FALSE | chr3:1789<br>36082:G:A | 47:chr3:17<br>8936082:G<br>:A | 0.026203 |
| 68_c3-2 | 68 | BRAF   | MODERATE | c.2044C>T                                          | p.Arg682Trp                                                   | 1   | FALSE | chr7:1404<br>39695:G:A | 47:chr7:14<br>0439695:G<br>:A | 0.000962 |
| 68_c3-2 | 68 | EPHA3  | MODERATE | c.497C>A                                           | p.Thr166Asn                                                   | 0   | FALSE | chr3:8925<br>9353:C:A  | 47:chr3:89<br>259353:C:<br>A  | 0.000827 |
| 68_c3-2 | 68 | HGF    | MODERATE | c.527G>A;<br>c.542G>A                              | p.Arg176Gln<br>;<br>p.Arg181Gln                               | 0   | FALSE | chr7:8138<br>1519:C:T  | 47:chr7:81<br>381519:C:<br>T  | 0.000894 |
| 68_c3-2 | 68 | DDR2   | MODERATE | c.1418G>A                                          | p.Arg473His                                                   | 2   | FALSE | chr1:1627<br>40216:G:A | 47:chr1:16<br>2740216:G<br>:A | 0.000927 |

|         |    |                   |                    |                                                                           |                                                                                                                 |   |       |                        |                               |          |
|---------|----|-------------------|--------------------|---------------------------------------------------------------------------|-----------------------------------------------------------------------------------------------------------------|---|-------|------------------------|-------------------------------|----------|
| 68_c3-2 | 68 | FGFR1             | MODERATE           | c.488G>T;<br>c.494G>T;<br>c.737G>T;<br>c.755G>T;<br>c.761G>T;<br>c.854G>T | p.Arg163Leu<br>;<br>p.Arg165Leu<br>;<br>p.Arg246Leu<br>;<br>p.Arg252Leu<br>;<br>p.Arg254Leu<br>;<br>p.Arg285Leu | 1 | FALSE | chr8:3828<br>2202:C:A  | 47:chr8:38<br>282202:C:<br>A  | 0.000896 |
| 68_c3-2 | 68 | EGFR;<br>EGFR-AS1 | MODERATE; MODIFIER | c.2572C>A<br>; n.-1G>T                                                    | p.Leu858Met                                                                                                     | 8 | FALSE | chr7:5525<br>9514:C:A  | 47:chr7:55<br>259514:C:<br>A  | 0.001157 |
| 68_c3-2 | 68 | EGFR;<br>EGFR-AS1 | MODERATE; MODIFIER | c.2568T>G<br>; n.-1A>C                                                    | p.Phe856Leu                                                                                                     | 1 | FALSE | chr7:5525<br>9510:T:G  | 47:chr7:55<br>259510:T:<br>G  | 0.001737 |
| 68_c3-2 | 68 | PIK3CA            | MODERATE           | c.3180C>A                                                                 | p.His1060Gln                                                                                                    | 2 | FALSE | chr3:1789<br>52125:C:A | 47:chr3:17<br>8952125:C:<br>A | 0.00067  |
| 68_c3-2 | 68 | CTNNB1            | MODERATE           | c.884C>A                                                                  | p.Ala295Asp                                                                                                     | 0 | FALSE | chr3:4126<br>7300:C:A  | 47:chr3:41<br>267300:C:<br>A  | 0.002155 |
| 68_c3-2 | 68 | EGFR              | MODIFIER; MODERATE | c.*2133G><br>A;<br>c.*2364G><br>A;<br>c.2030G>A                           | p.Arg677His                                                                                                     | 5 | FALSE | chr7:5524<br>0786:G:A  | 47:chr7:55<br>240786:G:<br>A  | 0.002114 |
| 68_c3-2 | 68 | MET               | HIGH               | c.2552C>A<br>;<br>c.2606C>A                                               | p.Ser851*;<br>p.Ser869*                                                                                         | 1 | FALSE | chr7:1164<br>03291:C:A | 47:chr7:11<br>6403291:C:<br>A | 0.000962 |
| 68_c3-2 | 68 | RET               | MODERATE           | c.1690A>C                                                                 | p.Thr564Pro                                                                                                     | 1 | FALSE | chr10:436<br>08342:A:C | 47:chr10:4<br>3608342:A:<br>C | 0.008138 |
| 68_c3-2 | 68 | PTEN              | MODERATE           | c.392C>A                                                                  | p.Thr131Asn                                                                                                     | 2 | FALSE | chr10:896<br>92908:C:A | 47:chr10:8<br>9692908:C:<br>A | 0.001403 |
| 68_c3-2 | 68 | EPHA3             | MODERATE           | c.2648G>A                                                                 | p.Arg883Gln                                                                                                     | 0 | FALSE | chr3:8949<br>9478:G:A  | 47:chr3:89<br>499478:G:<br>A  | 0.001486 |
| 68_c3-2 | 68 | PTEN              | HIGH               | c.720C>A                                                                  | p.Tyr240*                                                                                                       | 3 | FALSE | chr10:897<br>17695:C:A | 47:chr10:8<br>9717695:C:<br>A | 0.002081 |
| 68_c3-2 | 68 | EGFR              | MODERATE           | c.406C>A                                                                  | p.Pro136Thr                                                                                                     | 1 | FALSE | chr7:5521<br>1163:C:A  | 47:chr7:55<br>211163:C:<br>A  | 0.001587 |
| 68_c3-2 | 68 | TP53              | MODERATE           | c.127C>T;<br>c.208C>T;<br>c.487C>T;<br>c.604C>T                           | p.Arg43Cys;<br>p.Arg70Cys;<br>p.Arg163Cys<br>;<br>p.Arg202Cys                                                   | 6 | FALSE | chr17:757<br>8245:G:A  | 47:chr17:7<br>578245:G:<br>A  | 0.00144  |
| 68_c3-2 | 68 | ALK               | MODERATE           | c.3455T>C                                                                 | p.Leu1152Pro                                                                                                    | 1 | FALSE | chr2:2944<br>5270:A:G  | 47:chr2:29<br>445270:A:<br>G  | 0.002836 |

|         |    |                    |                    |                                                       |                                                            |    |       |                    |                       |          |
|---------|----|--------------------|--------------------|-------------------------------------------------------|------------------------------------------------------------|----|-------|--------------------|-----------------------|----------|
| 68_c3-2 | 68 | RET                | MODERATE           | c.2116G>A                                             | p.Val706Met                                                | 2  | FALSE | chr10:43610164:G:A | 47:chr10:43610164:G:A | 0.000808 |
| 68_c3-2 | 68 | CTNNB1             | MODERATE           | c.96C>A                                               | p.Asp32Glu                                                 | 0  | FALSE | chr3:41266099:C:A  | 47:chr3:41266099:C:A  | 0.00155  |
| 68_c3-2 | 68 | CTNNB1             | MODERATE           | c.110C>A                                              | p.Ser37Tyr                                                 | 0  | FALSE | chr3:41266113:C:A  | 47:chr3:41266113:C:A  | 0.001015 |
| 68_c3-2 | 68 | DDR2               | MODERATE           | c.1963G>A                                             | p.Glu655Lys                                                | 1  | FALSE | chr1:162745548:G:A | 47:chr1:162745548:G:A | 0.001328 |
| 68_c3-2 | 68 | NF1                | MODERATE           | c.3559C>A                                             | p.Leu1187Ile                                               | 1  | FALSE | chr17:29560082:C:A | 47:chr17:29560082:C:A | 0.000966 |
| 68_c3-2 | 68 | PTEN               | MODERATE           | c.443C>A                                              | p.Ala148Glu                                                | 1  | FALSE | chr10:89692959:C:A | 47:chr10:89692959:C:A | 0.001801 |
| 68_c3-2 | 68 | MAP2K1             | MODERATE           | c.316G>A                                              | p.Ala106Thr                                                | 1  | FALSE | chr15:66729108:G:A | 47:chr15:66729108:G:A | 0.000983 |
| 68_c3-2 | 68 | KIT                | MODERATE           | c.605T>C                                              | p.Leu202Pro                                                | 1  | FALSE | chr4:55564717:T:C  | 47:chr4:55564717:T:C  | 0.001056 |
| 68_c3-2 | 68 | PIK3CA             | MODERATE           | c.223C>A                                              | p.Gln75Lys                                                 | 1  | FALSE | chr3:178916836:C:A | 47:chr3:178916836:C:A | 0.000719 |
| 68_c3-2 | 68 | TP53               | MODERATE           | c.269G>T;<br>c.350G>T;<br>c.629G>T;<br>c.746G>T       | p.Arg90Met;<br>p.Arg117Met;<br>p.Arg210Met;<br>p.Arg249Met | 36 | FALSE | chr17:7577535:C:A  | 47:chr17:7577535:C:A  | 0.057018 |
| 68_c3-2 | 68 | TP53               | MODERATE           | c.234G>T;<br>c.315G>T;<br>c.594G>T;<br>c.711G>T       | p.Met78Ile;<br>p.Met105Ile;<br>p.Met198Ile;<br>p.Met237Ile | 81 | FALSE | chr17:7577570:C:A  | 47:chr17:7577570:C:A  | 0.001182 |
| 68_c3-2 | 68 | CTNNB1             | MODERATE           | c.125C>A                                              | p.Thr42Lys                                                 | 0  | FALSE | chr3:41266128:C:A  | 47:chr3:41266128:C:A  | 0.001977 |
| 68_c3-2 | 68 | EGFR               | MODERATE           | c.971G>A                                              | p.Arg324His                                                | 3  | FALSE | chr7:55223604:G:A  | 47:chr7:55223604:G:A  | 0.001635 |
| 68_c3-2 | 68 | HOXD-AS2;<br>HOXD8 | MODIFIER; MODERATE | n.*692G>T;<br>;<br>c.105C>A;<br>c.654C>A;<br>c.657C>A | p.Asn35Lys;<br>p.Asn218Lys;<br>p.Asn219Lys                 | 0  | FALSE | chr2:176996124:C:A | 47:chr2:176996124:C:A | 0.001446 |



|         |    |        |          |                                                 |                                                                    |     |       |                        |                               |          |
|---------|----|--------|----------|-------------------------------------------------|--------------------------------------------------------------------|-----|-------|------------------------|-------------------------------|----------|
| 68_c3-2 | 68 | TP53   | MODERATE | c.270G>T;<br>c.351G>T;<br>c.630G>T;<br>c.747G>T | p.Arg90Ser;<br>p.Arg117Ser<br>;<br>p.Arg210Ser<br>;<br>p.Arg249Ser | 318 | FALSE | chr17:757<br>7534:C:A  | 47:chr17:7<br>577534:C:<br>A  | 0.056911 |
| 68_c3-2 | 68 | KIT    | MODERATE | c.2854C>T;<br>c.2866C>T                         | p.Arg952Trp<br>;<br>p.Arg956Trp                                    | 3   | FALSE | chr4:5560<br>4658:C:T  | 47:chr4:55<br>604658:C:<br>T  | 0.001826 |
| 68_c3-2 | 68 | NF1    | MODERATE | c.5458C>A<br>;<br>c.5521C>A                     | p.Gln1820Lys<br>;<br>p.Gln1841Lys                                  | 3   | FALSE | chr17:296<br>54769:C:A | 47:chr17:2<br>9654769:C:<br>A | 0.000823 |
| 68_c3-2 | 68 | KIT    | MODERATE | c.148G>A                                        | p.Val50Met                                                         | 4   | FALSE | chr4:5556<br>1758:G:A  | 47:chr4:55<br>561758:G:<br>A  | 0.000827 |
| 68_c3-2 | 68 | PIK3CA | MODERATE | c.518C>A                                        | p.Ser173Tyr                                                        | 1   | FALSE | chr3:1789<br>17643:C:A | 47:chr3:17<br>8917643:C:<br>A | 0.001328 |
| 68_c3-2 | 68 | CTNNB1 | MODERATE | c.1346G>A                                       | p.Arg449His                                                        | 0   | FALSE | chr3:4127<br>5180:G:A  | 47:chr3:41<br>275180:G:<br>A  | 0.001248 |
| 68_c3-2 | 68 | TP53   | MODERATE | c.178C>T;<br>c.259C>T;<br>c.538C>T;<br>c.655C>T | p.Pro60Ser;<br>p.Pro87Ser;<br>p.Pro180Ser<br>;<br>p.Pro219Ser      | 4   | FALSE | chr17:757<br>8194:G:A  | 47:chr17:7<br>578194:G:<br>A  | 0.005546 |
| 68_c3-2 | 68 | HGF    | HIGH     | c.1993G>T<br>;<br>c.2008G>T                     | p.Glu665*;<br>p.Glu670*                                            | 0   | FALSE | chr7:8133<br>4708:C:A  | 47:chr7:81<br>334708:C:<br>A  | 0.001585 |
| 68_c3-2 | 68 | PIK3CA | MODERATE | c.1255C>A                                       | p.His419Asn                                                        | 1   | FALSE | chr3:1789<br>27977:C:A | 47:chr3:17<br>8927977:C:<br>A | 0.001513 |
| 68_c3-2 | 68 | KIT    | MODERATE | c.1156G>A                                       | p.Glu386Lys                                                        | 1   | FALSE | chr4:5557<br>5630:G:A  | 47:chr4:55<br>575630:G:<br>A  | 0.000948 |
| 68_c3-2 | 68 | NF1    | MODERATE | c.6405C>A<br>;<br>c.6468C>A                     | p.Phe2135Leu;<br>p.Phe2156Leu                                      | 1   | FALSE | chr17:296<br>64426:C:A | 47:chr17:2<br>9664426:C:<br>A | 0.001044 |
| 75_c3-1 | 75 | RET    | MODERATE | c.1771G>A                                       | p.Val591Ile                                                        | 1   | FALSE | chr10:436<br>09015:G:A | 48:chr10:4<br>3609015:G:<br>A | 0.002088 |
| 75_c3-1 | 75 | PTEN   | MODERATE | c.443C>A                                        | p.Ala148Glu                                                        | 1   | FALSE | chr10:896<br>92959:C:A | 48:chr10:8<br>9692959:C:<br>A | 0.002242 |
| 75_c3-1 | 75 | TP53   | MODERATE | c.136C>T;<br>c.415C>T;<br>c.532C>T;<br>c.55C>T  | p.His46Tyr;<br>p.His139Tyr;<br>p.His178Tyr;<br>p.His19Tyr          | 7   | FALSE | chr17:757<br>8398:G:A  | 48:chr17:7<br>578398:G:<br>A  | 0.001729 |

|         |    |                   |                    |                                                  |                                                             |    |       |                     |                        |          |
|---------|----|-------------------|--------------------|--------------------------------------------------|-------------------------------------------------------------|----|-------|---------------------|------------------------|----------|
| 75_c3-1 | 75 | EGFR              | MODIFIER; MODERATE | c.*2364C>T;<br>c.2174C>T                         | ; p.Thr725Met                                               | 2  | FALSE | chr7:55241726:C:T   | 48:chr7:55241726:C:T   | 0.001706 |
| 75_c3-1 | 75 | PIK3CA            | MODERATE           | c.473C>T                                         | p.Ser158Leu                                                 | 1  | FALSE | chr3:178917598:C:T  | 48:chr3:178917598:C:T  | 0.002028 |
| 75_c3-1 | 75 | TP53              | MODIFIER; MODERATE | c.-3G>T;<br>c.358G>T;<br>c.475G>T;<br>c.79G>T    | ; p.Ala120Ser;<br>p.Ala159Ser;<br>p.Ala27Ser                | 23 | FALSE | chr17:7578455:C:A   | 48:chr17:7578455:C:A   | 0.001825 |
| 75_c3-1 | 75 | RET               | MODERATE           | c.1690A>C                                        | p.Thr564Pro                                                 | 1  | FALSE | chr10:43608342:A:C  | 48:chr10:43608342:A:C  | 0.003058 |
| 75_c3-1 | 75 | AKT1              | MODERATE           | c.1108C>T                                        | p.Arg370Cys                                                 | 1  | FALSE | chr14:105239279:G:A | 48:chr14:105239279:G:A | 0.001696 |
| 75_c3-1 | 75 | DDR2              | MODERATE           | c.664G>A                                         | p.Gly222Arg                                                 | 2  | FALSE | chr1:162725552:G:A  | 48:chr1:162725552:G:A  | 0.001818 |
| 75_c3-1 | 75 | PIK3R1            | MODERATE           | c.1709T>C;<br>c.620T>C;<br>c.809T>C;<br>c.899T>C | p.Leu570Pro;<br>p.Leu207Pro;<br>p.Leu270Pro;<br>p.Leu300Pro | 2  | FALSE | chr5:67591116:T:C   | 48:chr5:67591116:T:C   | 0.00198  |
| 75_c3-1 | 75 | TP53              | MODERATE           | c.364G>A;<br>c.481G>A;<br>c.4G>A;<br>c.85G>A     | p.Ala122Thr;<br>p.Ala161Thr;<br>p.Ala2Thr;<br>p.Ala29Thr    | 53 | FALSE | chr17:7578449:C:T   | 48:chr17:7578449:C:T   | 0.00185  |
| 75_c3-1 | 75 | EGFR;<br>EGFR-AS1 | MODERATE; MODIFIER | c.2300C>T;<br>n.1262G>A                          | p.Ala767Val;                                                | 5  | FALSE | chr7:55249002:C:T   | 48:chr7:55249002:C:T   | 0.001311 |
| 75_c3-1 | 75 | PIK3CA            | MODERATE           | c.1255C>A                                        | p.His419Asn                                                 | 1  | FALSE | chr3:178927977:C:A  | 48:chr3:178927977:C:A  | 0.003759 |
| 75_c3-1 | 75 | KIT               | MODERATE           | c.1156G>A                                        | p.Glu386Lys                                                 | 1  | FALSE | chr4:55575630:G:A   | 48:chr4:55575630:G:A   | 0.003322 |
| 75_c3-1 | 75 | TP53              | MODERATE           | c.497G>T;<br>c.578G>T;<br>c.857G>T;<br>c.974G>T  | p.Gly166Val;<br>p.Gly193Val;<br>p.Gly286Val;<br>p.Gly325Val | 1  | FALSE | chr17:7576872:C:A   | 48:chr17:7576872:C:A   | 0.001878 |
| 75_c3-1 | 75 | PIK3CA            | MODERATE           | c.518C>A                                         | p.Ser173Tyr                                                 | 1  | FALSE | chr3:178917643:C:A  | 48:chr3:178917643:C:A  | 0.00191  |
| 75_c3-1 | 75 | HRAS;<br>LRRCS6   | MODERATE; MODIFIER | c.175G>A;<br>c.-506C>T                           | p.Ala59Thr;                                                 | 2  | FALSE | chr11:533881:C:T    | 48:chr11:533881:C:T    | 0.001691 |

|         |    |                   |                    |                                                                               |                                                             |    |       |                    |                       |          |
|---------|----|-------------------|--------------------|-------------------------------------------------------------------------------|-------------------------------------------------------------|----|-------|--------------------|-----------------------|----------|
| 75_c3-1 | 75 | EGFR              | MODIFIER; MODERATE | c.*1464C>A;<br>c.1476C>A                                                      | p.Ser492Arg                                                 | 4  | FALSE | chr7:55228009:C:A  | 48:chr7:55228009:C:A  | 0.002035 |
| 62_c2-2 | 62 | PTEN              | MODERATE           | c.443C>A                                                                      | p.Ala148Glu                                                 | 1  | FALSE | chr10:89692959:C:A | 50:chr10:89692959:C:A | 0.001718 |
| 62_c2-2 | 62 | TP53              | MODERATE           | c.126G>T;<br>c.207G>T;<br>c.486G>T;<br>c.603G>T                               | p.Leu42Phe;<br>p.Leu69Phe;<br>p.Leu162Phe;<br>p.Leu201Phe   | 4  | FALSE | chr17:7578246:C:A  | 50:chr17:7578246:C:A  | 0.000876 |
| 62_c2-2 | 62 | ALK               | MODERATE           | c.2431G>A                                                                     | p.Val811Met                                                 | 2  | FALSE | chr2:29456487:C:T  | 50:chr2:29456487:C:T  | 0.001757 |
| 62_c2-2 | 62 | CTNNB1            | MODERATE           | c.125C>A                                                                      | p.Thr42Lys                                                  | 0  | FALSE | chr3:41266128:C:A  | 50:chr3:41266128:C:A  | 0.002102 |
| 62_c2-2 | 62 | EGFR;<br>EGFR-AS1 | LOW; MODIFIER      | c.2472C>A;<br>n.-1G>T                                                         | p.Gly824Gly                                                 | 1  | FALSE | chr7:55259414:C:A  | 50:chr7:55259414:C:A  | 0.00225  |
| 62_c2-2 | 62 | TP53              | MODIFIER; HIGH     | c.-104A>G;<br>c.-23A>G;<br>c.259-2A>G;<br>c.376-2A>G                          |                                                             | 19 | FALSE | chr17:7578556:T:C  | 50:chr17:7578556:T:C  | 0.001131 |
| 62_c2-2 | 62 | ROS1              | MODERATE           | c.5412G>T                                                                     | p.Lys1804Asn                                                | 1  | FALSE | chr6:117647532:C:A | 50:chr6:117647532:C:A | 0.001919 |
| 62_c2-2 | 62 | RET               | MODERATE           | c.2236C>A                                                                     | p.Leu746Met                                                 | 1  | FALSE | chr10:43612131:C:A | 50:chr10:43612131:C:A | 0.001064 |
| 62_c2-2 | 62 | BRAF              | MODERATE           | c.1796C>T                                                                     | p.Thr599Ile                                                 | 4  | FALSE | chr7:140453139:G:A | 50:chr7:140453139:G:A | 0.000978 |
| 62_c2-2 | 62 | TP53              | MODIFIER; MODERATE | c.*137A>G;<br>c.*225A>G;<br>c.1001A>G;<br>c.1118A>G;<br>c.641A>G;<br>c.722A>G | p.Lys334Arg;<br>p.Lys373Arg;<br>p.Lys214Arg;<br>p.Lys241Arg | 1  | FALSE | chr17:7572991:T:C  | 50:chr17:7572991:T:C  | 0.005036 |
| 62_c2-2 | 62 | TP53              | MODERATE; MODIFIER | c.115G>T;<br>c.232G>T;<br>c.-279G>T;<br>c.-360G>T                             | p.Ala39Ser;<br>p.Ala78Ser;                                  | 1  | FALSE | chr17:7579455:C:A  | 50:chr17:7579455:C:A  | 0.001595 |

|         |    |                   |                    |                                                                                                                            |                                                               |    |       |                        |                               |          |
|---------|----|-------------------|--------------------|----------------------------------------------------------------------------------------------------------------------------|---------------------------------------------------------------|----|-------|------------------------|-------------------------------|----------|
| 62_c2-2 | 62 | CTNNB1            | MODERATE           | c.884C>A                                                                                                                   | p.Ala295Asp                                                   | 0  | FALSE | chr3:4126<br>7300:C:A  | 50:chr3:41<br>267300:C:<br>A  | 0.001765 |
| 62_c2-2 | 62 | NF1               | HIGH               | c.1318C>T                                                                                                                  | p.Arg440*                                                     | 10 | FALSE | chr17:295<br>33315:C:T | 50:chr17:2<br>9533315:C<br>:T | 0.001024 |
| 62_c2-2 | 62 | TP53              | MODIFIER; MODERATE | c.-5G>T;<br>c.356G>T;<br>c.473G>T;<br>c.77G>T                                                                              | p.Arg119Leu<br>;<br>p.Arg158Leu<br>;<br>p.Arg26Leu            | 80 | FALSE | chr17:757<br>8457:C:A  | 50:chr17:7<br>578457:C:<br>A  | 0.001543 |
| 62_c2-2 | 62 | KIT               | MODERATE           | c.235C>A                                                                                                                   | p.Gln79Lys                                                    | 2  | FALSE | chr4:5556<br>1845:C:A  | 50:chr4:55<br>561845:C:<br>A  | 0.001669 |
| 62_c2-2 | 62 | ALK               | MODERATE           | c.1307C>T                                                                                                                  | p.Ala436Val                                                   | 1  | FALSE | chr2:2955<br>1323:G:A  | 50:chr2:29<br>551323:G:<br>A  | 0.000915 |
| 62_c2-2 | 62 | TP53              | MODERATE           | c.126G>T;<br>c.405G>T;<br>c.45G>T;<br>c.522G>T                                                                             | p.Arg42Ser;<br>p.Arg135Ser<br>;<br>p.Arg15Ser;<br>p.Arg174Ser | 2  | FALSE | chr17:757<br>8408:C:A  | 50:chr17:7<br>578408:C:<br>A  | 0.001818 |
| 62_c2-2 | 62 | HGF               | HIGH               | c.1993G>T<br>;<br>c.2008G>T                                                                                                | p.Glu665*;<br>p.Glu670*                                       | 0  | FALSE | chr7:8133<br>4708:C:A  | 50:chr7:81<br>334708:C:<br>A  | 0.002377 |
| 62_c2-2 | 62 | EGFR;<br>EGFR-AS1 | MODERATE; MODIFIER | c.2612C>T;<br>n.-1G>A                                                                                                      | p.Ala871Val;                                                  | 3  | FALSE | chr7:5525<br>9554:C:T  | 50:chr7:55<br>259554:C:<br>T  | 0.001726 |
| 62_c2-2 | 62 | EPHA3             | MODERATE           | c.497C>A                                                                                                                   | p.Thr166Asn                                                   | 0  | FALSE | chr3:8925<br>9353:C:A  | 50:chr3:89<br>259353:C:<br>A  | 0.00111  |
| 62_c2-2 | 62 | ALK               | MODERATE           | c.1359G>T                                                                                                                  | p.Gln453His                                                   | 1  | FALSE | chr2:2955<br>1271:C:A  | 50:chr2:29<br>551271:C:<br>A  | 0.000942 |
| 62_c2-2 | 62 | CSDE1;<br>NRAS    | MODIFIER; HIGH     | c.*2430G><br>T;<br>c.*2523G><br>T;<br>c.*2817G><br>T;<br>c.*2910G><br>T;<br>c.*2964G><br>T;<br>c.*3057G><br>T;<br>c.187G>T | p.Glu63*                                                      | 1  | FALSE | chr1:1152<br>56524:C:A | 50:chr1:11<br>5256524:C:<br>A | 0.001017 |
| 62_c2-2 | 62 | CTNNB1            | MODERATE           | c.86C>A                                                                                                                    | p.Ser29Tyr                                                    | 0  | FALSE | chr3:4126<br>6089:C:A  | 50:chr3:41<br>266089:C:<br>A  | 0.001468 |

|         |    |                |                    |                                                                                                    |                                                                                             |      |       |                    |                       |          |
|---------|----|----------------|--------------------|----------------------------------------------------------------------------------------------------|---------------------------------------------------------------------------------------------|------|-------|--------------------|-----------------------|----------|
| 62_c2-2 | 62 | FGFR1          | MODERATE           | c.1013C>T;<br>c.1019C>T;<br>c.1112C>T;<br>c.746C>T;<br>c.752C>T;<br>c.995C>T                       | p.Thr338Met;<br>p.Thr340Met;<br>p.Thr371Met;<br>p.Thr249Met;<br>p.Thr251Met;<br>p.Thr332Met | 2    | FALSE | chr8:38279377:G:A  | 50:chr8:38279377:G:A  | 0.001646 |
| 62_c2-2 | 62 | MET            | MODERATE           | c.1690G>A                                                                                          | p.Ala564Thr                                                                                 | 1    | FALSE | chr7:116381068:G:A | 50:chr7:116381068:G:A | 0.001252 |
| 62_c2-2 | 62 | CSDE1;<br>NRAS | MODIFIER; MODERATE | c.*2430A>G;<br>c.*2523A>G;<br>c.*2817A>G;<br>c.*2910A>G;<br>c.*2964A>G;<br>c.*3057A>G;<br>c.182A>G | ; p.Gln61Arg                                                                                | 1103 | FALSE | chr1:115256529:T:C | 50:chr1:115256529:T:C | 0.507299 |
| 62_c2-2 | 62 | DDR2           | MODERATE           | c.313C>A                                                                                           | p.Arg105Ser                                                                                 | 2    | FALSE | chr1:162724541:C:A | 50:chr1:162724541:C:A | 0.001437 |
| 62_c2-2 | 62 | CWH43          | MODERATE           | c.209C>T;<br>c.290C>T                                                                              | p.Ala70Val;<br>p.Ala97Val                                                                   | 0    | FALSE | chr4:48993525:C:T  | 50:chr4:48993525:C:T  | 0.001102 |
| 62_c2-2 | 62 | RPL19          | MODERATE           | c.452G>A                                                                                           | p.Arg151His                                                                                 | 0    | FALSE | chr17:37360425:G:A | 50:chr17:37360425:G:A | 0.001188 |
| 62_c2-2 | 62 | EPHA3          | MODERATE           | c.1132C>A                                                                                          | p.Pro378Thr                                                                                 | 0    | FALSE | chr3:89391066:C:A  | 50:chr3:89391066:C:A  | 0.000453 |
| 62_c2-2 | 62 | RET            | MODERATE           | c.1665C>A                                                                                          | p.Phe555Leu                                                                                 | 1    | FALSE | chr10:43608317:C:A | 50:chr10:43608317:C:A | 0.001236 |
| 62_c2-2 | 62 | TP53           | MODERATE           | c.367C>T;<br>c.448C>T;<br>c.727C>T;<br>c.844C>T                                                    | p.Arg123Trp;<br>p.Arg150Trp;<br>p.Arg243Trp;<br>p.Arg282Trp                                 | 479  | FALSE | chr17:7577094:G:A  | 50:chr17:7577094:G:A  | 0.00105  |
| 62_c2-2 | 62 | PTEN           | MODERATE           | c.392C>A                                                                                           | p.Thr131Asn                                                                                 | 2    | FALSE | chr10:89692908:C:A | 50:chr10:89692908:C:A | 0.001397 |
| 62_c2-2 | 62 | KIT            | MODERATE           | c.2869G>A;<br>c.2881G>A                                                                            | p.Gly957Ser;<br>p.Gly961Ser                                                                 | 2    | FALSE | chr4:55604673:G:A  | 50:chr4:55604673:G:A  | 0.000883 |

|         |    |        |                    |                                                 |                                                                         |    |       |                        |                               |          |
|---------|----|--------|--------------------|-------------------------------------------------|-------------------------------------------------------------------------|----|-------|------------------------|-------------------------------|----------|
| 62_c2-2 | 62 | PIK3CA | MODERATE           | c.518C>A                                        | p.Ser173Tyr                                                             | 1  | FALSE | chr3:1789<br>17643:C:A | 50:chr3:17<br>8917643:C<br>:A | 0.001014 |
| 62_c2-2 | 62 | DDR2   | MODERATE           | c.1963G>A                                       | p.Glu655Lys                                                             | 1  | FALSE | chr1:1627<br>45548:G:A | 50:chr1:16<br>2745548:G<br>:A | 0.001898 |
| 62_c2-2 | 62 | EPHA3  | MODERATE           | c.1280C>T                                       | p.Ala427Val                                                             | 0  | FALSE | chr3:8939<br>1214:C:T  | 50:chr3:89<br>391214:C:<br>T  | 0.000501 |
| 62_c2-2 | 62 | ERBB2  | MODERATE; MODIFIER | c.560G>A;<br>c.605G>A;<br>c.650G>A;<br>n.974G>A | p.Arg187His<br>;<br>p.Arg202His<br>;<br>p.Arg217His<br>;                | 1  | FALSE | chr17:378<br>66345:G:A | 50:chr17:3<br>7866345:G<br>:A | 0.001711 |
| 62_c2-2 | 62 | RET    | MODERATE           | c.1690A>C                                       | p.Thr564Pro                                                             | 1  | FALSE | chr10:436<br>08342:A:C | 50:chr10:4<br>3608342:A<br>:C | 0.002279 |
| 62_c2-2 | 62 | PIK3CA | MODERATE           | c.193G>A                                        | p.Glu65Lys                                                              | 1  | FALSE | chr3:1789<br>16806:G:A | 50:chr3:17<br>8916806:G<br>:A | 0.000882 |
| 62_c2-2 | 62 | TP53   | MODERATE           | c.364G>T;<br>c.445G>T;<br>c.724G>T;<br>c.841G>T | p.Asp122Tyr<br>;<br>p.Asp149Tyr<br>;<br>p.Asp242Tyr<br>;<br>p.Asp281Tyr | 28 | FALSE | chr17:757<br>7097:C:A  | 50:chr17:7<br>577097:C:<br>A  | 0.001587 |
| 62_c2-2 | 62 | DDR2   | MODERATE           | c.691C>A                                        | p.Gln231Lys                                                             | 1  | FALSE | chr1:1627<br>29605:C:A | 50:chr1:16<br>2729605:C<br>:A | 0.001705 |
| 62_c2-2 | 62 | EPHA3  | MODERATE           | c.1234G>A                                       | p.Val412Ile                                                             | 0  | FALSE | chr3:8939<br>1168:G:A  | 50:chr3:89<br>391168:G:<br>A  | 0.000465 |
| 62_c2-2 | 62 | PIK3CA | MODERATE           | c.3180C>A                                       | p.His1060Gln                                                            | 2  | FALSE | chr3:1789<br>52125:C:A | 50:chr3:17<br>8952125:C<br>:A | 0.000762 |
| 62_c2-2 | 62 | PIK3CA | HIGH               | c.3152G>A                                       | p.Trp1051*                                                              | 3  | FALSE | chr3:1789<br>52097:G:A | 50:chr3:17<br>8952097:G<br>:A | 0.000808 |
| 62_c2-2 | 62 | PTEN   | MODERATE           | c.377C>A                                        | p.Ala126Asp                                                             | 4  | FALSE | chr10:896<br>92893:C:A | 50:chr10:8<br>9692893:C<br>:A | 0.00094  |
| 62_c2-2 | 62 | ALK    | MODERATE           | c.4409C>T                                       | p.Ala1470Val                                                            | 1  | FALSE | chr2:2941<br>6544:G:A  | 50:chr2:29<br>416544:G:<br>A  | 0.000856 |
| 62_c2-2 | 62 | KIT    | MODERATE           | c.2197G>A;<br>c.2209G>A                         | p.Asp733Asn;<br>p.Asp737Asn                                             | 2  | FALSE | chr4:5559<br>7561:G:A  | 50:chr4:55<br>597561:G:<br>A  | 0.00085  |
| 62_c2-2 | 62 | PIK3CA | MODERATE           | c.478C>A                                        | p.His160Asn                                                             | 1  | FALSE | chr3:1789<br>17603:C:A | 50:chr3:17<br>8917603:C<br>:A | 0.000954 |
| 62_c2-2 | 62 | EPHA3  | HIGH               | c.1515C>A                                       | p.Tyr505*                                                               | 0  | FALSE | chr3:8944<br>8551:C:A  | 50:chr3:89<br>448551:C:<br>A  | 0.001103 |

|         |    |                   |                    |                                                 |                                                                         |     |       |                        |                               |          |
|---------|----|-------------------|--------------------|-------------------------------------------------|-------------------------------------------------------------------------|-----|-------|------------------------|-------------------------------|----------|
| 62_c2-2 | 62 | TP53              | MODERATE           | c.340C>T;<br>c.421C>T;<br>c.700C>T;<br>c.817C>T | p.Arg114Cys<br>;<br>p.Arg141Cys<br>;<br>p.Arg234Cys<br>;<br>p.Arg273Cys | 601 | FALSE | chr17:757<br>7121:G:A  | 50:chr17:7<br>577121:G:<br>A  | 0.001004 |
| 62_c2-2 | 62 | CWH43             | MODERATE           | c.1372G>A<br>;<br>c.1453G>A                     | p.Glu458Lys<br>;<br>p.Glu485Lys                                         | 0   | FALSE | chr4:4903<br>2922:G:A  | 50:chr4:49<br>032922:G:<br>A  | 0.001183 |
| 62_c2-2 | 62 | EGFR;<br>EGFR-AS1 | MODIFIER; MODERATE | c.*2364C><br>T;<br>c.2258C>T;<br>n.*2821G><br>A | p.Pro753Leu                                                             | 3   | FALSE | chr7:5524<br>2488:C:T  | 50:chr7:55<br>242488:C:<br>T  | 0.001399 |
| 62_c2-2 | 62 | TP53              | MODERATE           | c.125G>A;<br>c.404G>A;<br>c.44G>A;<br>c.521G>A  | p.Arg42Lys;<br>p.Arg135Lys<br>;<br>p.Arg15Lys;<br>p.Arg174Lys           | 5   | FALSE | chr17:757<br>8409:C:T  | 50:chr17:7<br>578409:C:<br>T  | 0.001823 |
| 62_c2-2 | 62 | EGFR              | HIGH               | c.211C>T                                        | p.Gln71*                                                                | 1   | FALSE | chr7:5521<br>0101:C:T  | 50:chr7:55<br>210101:C:<br>T  | 0.000986 |
| 82_c2-b | 82 | PIK3CA            | MODERATE           | c.478C>A                                        | p.His160Asn                                                             | 1   | FALSE | chr3:1789<br>17603:C:A | 51:chr3:17<br>8917603:C:<br>A | 0.001855 |
| 82_c2-b | 82 | MET               | HIGH               | c.1619G>A                                       | p.Trp540*                                                               | 1   | FALSE | chr7:1163<br>80997:G:A | 51:chr7:11<br>6380997:G:<br>A | 0.001022 |
| 82_c2-b | 82 | EGFR;<br>EGFR-AS1 | MODERATE; MODIFIER | c.2353A>C<br>;<br>n.1209T>G                     | p.Thr785Pro<br>;                                                        | 1   | FALSE | chr7:5524<br>9055:A:C  | 51:chr7:55<br>249055:A:<br>C  | 0.001043 |
| 82_c2-b | 82 | TP53              | MODIFIER; MODERATE | c.-5G>T;<br>c.356G>T;<br>c.473G>T;<br>c.77G>T   | p.Arg119Leu<br>;<br>p.Arg158Leu<br>;<br>p.Arg26Leu                      | 80  | FALSE | chr17:757<br>8457:C:A  | 51:chr17:7<br>578457:C:<br>A  | 0.001623 |
| 82_c2-b | 82 | NF1               | MODERATE           | c.2695T>G                                       | p.Leu899Val                                                             | 3   | FALSE | chr17:295<br>56328:T:G | 51:chr17:2<br>9556328:T:<br>G | 0.013265 |
| 82_c2-b | 82 | PTEN              | MODERATE           | c.443C>A                                        | p.Ala148Glu                                                             | 1   | FALSE | chr10:896<br>92959:C:A | 51:chr10:8<br>9692959:C:<br>A | 0.001356 |

|         |    |                 |                    |                                                                                                   |                                                                                                                 |    |       |                        |                               |          |
|---------|----|-----------------|--------------------|---------------------------------------------------------------------------------------------------|-----------------------------------------------------------------------------------------------------------------|----|-------|------------------------|-------------------------------|----------|
| 82_c2-b | 82 | TP53            | MODIFIER; MODERATE | c.*137A>G<br>;<br>c.*225A>G<br>;<br>c.1001A>G<br>;<br>c.1118A>G<br>;<br>c.641A>G<br>;<br>c.722A>G | p.Lys334Arg<br>;<br>p.Lys373Arg<br>;<br>p.Lys214Arg<br>;<br>p.Lys241Arg                                         | 1  | FALSE | chr17:757<br>2991:T:C  | 51:chr17:7<br>572991:T:<br>C  | 0.003941 |
| 82_c2-b | 82 | FGFR1           | MODERATE           | c.359C>T;<br>c.365C>T;<br>c.608C>T;<br>c.626C>T;<br>c.632C>T;<br>c.725C>T                         | p.Ala120Val;<br>p.Ala122Val;<br>p.Ala203Val;<br>p.Ala209Val;<br>p.Ala211Val;<br>p.Ala242Val                     | 1  | FALSE | chr8:3828<br>3753:G:A  | 51:chr8:38<br>283753:G:<br>A  | 0.001173 |
| 82_c2-b | 82 | MET             | MODERATE           | c.608C>A                                                                                          | p.Ser203Tyr                                                                                                     | 1  | FALSE | chr7:1163<br>39746:C:A | 51:chr7:11<br>6339746:C<br>:A | 0.000935 |
| 82_c2-b | 82 | CTNNB1          | MODERATE           | c.70C>T                                                                                           | p.His24Tyr                                                                                                      | 0  | FALSE | chr3:4126<br>6073:C:T  | 51:chr3:41<br>266073:C:<br>T  | 0.001229 |
| 82_c2-b | 82 | MET             | MODERATE           | c.487T>C                                                                                          | p.Ser163Pro                                                                                                     | 1  | FALSE | chr7:1163<br>39625:T:C | 51:chr7:11<br>6339625:T<br>:C | 0.000867 |
| 82_c2-b | 82 | HGF             | MODERATE           | c.1324G>T<br>;<br>c.1339G>T                                                                       | p.Ala442Ser;<br>p.Ala447Ser                                                                                     | 0  | FALSE | chr7:8134<br>6614:C:A  | 51:chr7:81<br>346614:C:<br>A  | 0.001317 |
| 82_c2-b | 82 | FGFR1           | MODERATE           | c.488G>T;<br>c.494G>T;<br>c.737G>T;<br>c.755G>T;<br>c.761G>T;<br>c.854G>T                         | p.Arg163Leu<br>;<br>p.Arg165Leu<br>;<br>p.Arg246Leu<br>;<br>p.Arg252Leu<br>;<br>p.Arg254Leu<br>;<br>p.Arg285Leu | 1  | FALSE | chr8:3828<br>2202:C:A  | 51:chr8:38<br>282202:C:<br>A  | 0.001087 |
| 82_c2-b | 82 | CTNNB1          | MODERATE           | c.884C>A                                                                                          | p.Ala295Asp                                                                                                     | 0  | FALSE | chr3:4126<br>7300:C:A  | 51:chr3:41<br>267300:C:<br>A  | 0.001253 |
| 82_c2-b | 82 | MAP2K1          | MODERATE           | c.198C>A                                                                                          | p.Asp66Glu                                                                                                      | 4  | FALSE | chr15:667<br>27482:C:A | 51:chr15:6<br>6727482:C<br>:A | 0.001042 |
| 82_c2-b | 82 | HRAS;<br>LRRCS6 | MODERATE; MODIFIER | c.351G>T;<br>c.-506C>A                                                                            | p.Lys117Asn<br>;                                                                                                | 3  | FALSE | chr11:533<br>552:C:A   | 51:chr11:5<br>33552:C:A       | 0.00142  |
| 82_c2-b | 82 | PIK3CA          | MODERATE           | c.263G>A                                                                                          | p.Arg88Gln                                                                                                      | 97 | FALSE | chr3:1789<br>16876:G:A | 51:chr3:17<br>8916876:G<br>:A | 0.000835 |



|         |    |                    |                    |                                                                                                   |                                                             |      |       |                        |                           |          |
|---------|----|--------------------|--------------------|---------------------------------------------------------------------------------------------------|-------------------------------------------------------------|------|-------|------------------------|---------------------------|----------|
| 82_c2-b | 82 | TP53               | MODERATE           | c.337G>A;<br>c.418G>A;<br>c.697G>A;<br>c.814G>A                                                   | p.Val113Met;<br>p.Val140Met;<br>p.Val233Met;<br>p.Val272Met | 85   | FALSE | chr17:757<br>7124:C:T  | 51:chr17:7<br>577124:C:T  | 0.018543 |
| 82_c2-b | 82 | HOXD-AS2;<br>HOXD8 | MODIFIER; MODERATE | n.*692G>T<br>; c.22C>A;<br>c.574C>A                                                               | ; p.Gln8Lys;<br>p.Gln192Lys                                 | 0    | FALSE | chr2:1769<br>95668:C:A | 51:chr2:17<br>6995668:C:A | 0.001838 |
| 82_c2-b | 82 | PTEN               | MODERATE           | c.392C>A                                                                                          | p.Thr131Asn                                                 | 2    | FALSE | chr10:896<br>92908:C:A | 51:chr10:8<br>9692908:C:A | 0.001121 |
| 82_c2-b | 82 | GAPDH;<br>IFFO1    | MODERATE; MODIFIER | c.773G>A;<br>c.899G>A;<br>c.*1743C><br>T;<br>c.*1746C><br>T;<br>c.*1770C><br>T;<br>n.*2798C><br>T | p.Gly258Asp<br>;<br>p.Gly300Asp<br>;                        | 0    | FALSE | chr12:664<br>7123:G:A  | 51:chr12:6<br>647123:G:A  | 0.001326 |
| 82_c2-b | 82 | BRAF               | MODERATE           | c.1405G>A                                                                                         | p.Gly469Arg                                                 | 11   | FALSE | chr7:1404<br>81403:C:T | 51:chr7:14<br>0481403:C:T | 0.001164 |
| 82_c2-b | 82 | TP53               | HIGH               | c.109C>T;<br>c.190C>T;<br>c.469C>T;<br>c.586C>T                                                   | p.Arg37*;<br>p.Arg64*;<br>p.Arg157*;<br>p.Arg196*           | 191  | FALSE | chr17:757<br>8263:G:A  | 51:chr17:7<br>578263:G:A  | 0.093786 |
| 82_c2-b | 82 | PIK3CA             | MODERATE           | c.1633G>A                                                                                         | p.Glu545Lys                                                 | 1189 | FALSE | chr3:1789<br>36091:G:A | 51:chr3:17<br>8936091:G:A | 0.078626 |
| 82_c2-b | 82 | TP53               | MODIFIER; MODERATE | c.-3G>T;<br>c.358G>T;<br>c.475G>T;<br>c.79G>T                                                     | ; p.Ala120Ser;<br>p.Ala159Ser;<br>p.Ala27Ser                | 23   | FALSE | chr17:757<br>8455:C:A  | 51:chr17:7<br>578455:C:A  | 0.001599 |
| 82_c2-b | 82 | PTEN               | MODERATE           | c.407G>A                                                                                          | p.Cys136Tyr                                                 | 14   | FALSE | chr10:896<br>92923:G:A | 51:chr10:8<br>9692923:G:A | 0.001116 |
| 82_c2-b | 82 | TP53               | MODERATE; MODIFIER | c.115G>T;<br>c.232G>T;<br>c.-279G>T;<br>c.-360G>T                                                 | p.Ala39Ser;<br>p.Ala78Ser;                                  | 1    | FALSE | chr17:757<br>9455:C:A  | 51:chr17:7<br>579455:C:A  | 0.00173  |

|         |    |                   |                    |                                                                                               |                                                                                             |   |       |                        |                               |          |
|---------|----|-------------------|--------------------|-----------------------------------------------------------------------------------------------|---------------------------------------------------------------------------------------------|---|-------|------------------------|-------------------------------|----------|
| 82_c2-b | 82 | FGFR1             | MODERATE           | c.1048G>A<br>;<br>c.1066G>A<br>;<br>c.1072G>A<br>;<br>c.1165G>A<br>;<br>c.799G>A;<br>c.805G>A | p.Val350Ile;<br>p.Val356Ile;<br>p.Val358Ile;<br>p.Val389Ile;<br>p.Val267Ile;<br>p.Val269Ile | 1 | FALSE | chr8:3827<br>9324:C:T  | 51:chr8:38<br>279324:C:<br>T  | 0.001496 |
| 82_c2-b | 82 | MET               | HIGH               | c.1249C>T                                                                                     | p.Arg417*                                                                                   | 1 | FALSE | chr7:1163<br>71770:C:T | 51:chr7:11<br>6371770:C<br>:T | 0.001504 |
| 82_c2-b | 82 | EGFR;<br>EGFR-AS1 | MODERATE; MODIFIER | c.2305G>A<br>;<br>n.1257C>T                                                                   | p.Val769Me<br>t;                                                                            | 3 | FALSE | chr7:5524<br>9007:G:A  | 51:chr7:55<br>249007:G:<br>A  | 0.00094  |
| 82_c2-b | 82 | KIT               | MODERATE           | c.1485C>A                                                                                     | p.Asn495Lys                                                                                 | 1 | FALSE | chr4:5559<br>2161:C:A  | 51:chr4:55<br>592161:C:<br>A  | 0.001263 |
| 82_c2-b | 82 | TP53              | MODERATE           | c.142G>T;<br>c.223G>T;<br>c.502G>T;<br>c.619G>T                                               | p.Asp48Tyr;<br>p.Asp75Tyr;<br>p.Asp168Tyr<br>;<br>p.Asp207Tyr                               | 1 | FALSE | chr17:757<br>8230:C:A  | 51:chr17:7<br>578230:C:<br>A  | 0.001206 |
| 82_c2-b | 82 | CTNNB1            | MODERATE           | c.110C>A                                                                                      | p.Ser37Tyr                                                                                  | 0 | FALSE | chr3:4126<br>6113:C:A  | 51:chr3:41<br>266113:C:<br>A  | 0.001176 |
| 82_c2-b | 82 | EGFR;<br>EGFR-AS1 | MODERATE; MODIFIER | c.2386G>A<br>;<br>n.1176C>T                                                                   | p.Gly796Ser<br>;                                                                            | 3 | FALSE | chr7:5524<br>9088:G:A  | 51:chr7:55<br>249088:G:<br>A  | 0.001044 |
| 82_c2-b | 82 | PTEN              | HIGH               | c.720C>A                                                                                      | p.Tyr240*                                                                                   | 3 | FALSE | chr10:897<br>17695:C:A | 51:chr10:8<br>9717695:C<br>:A | 0.001808 |
| 82_c2-b | 82 | ROS1              | MODERATE           | c.5412G>T                                                                                     | p.Lys1804As<br>n                                                                            | 1 | FALSE | chr6:1176<br>47532:C:A | 51:chr6:11<br>7647532:C<br>:A | 0.001422 |
| 82_c2-b | 82 | RET               | MODERATE           | c.1690A>C                                                                                     | p.Thr564Pro                                                                                 | 1 | FALSE | chr10:436<br>08342:A:C | 51:chr10:4<br>3608342:A<br>:C | 0.008677 |
| 82_c2-b | 82 | EGFR;<br>EGFR-AS1 | MODIFIER; MODERATE | c.*2364G><br>A;<br>c.2227G>A<br>;<br>n.*2821C><br>T                                           | p.Ala743Thr                                                                                 | 3 | FALSE | chr7:5524<br>2457:G:A  | 51:chr7:55<br>242457:G:<br>A  | 0.001071 |
| 82_c2-b | 82 | DDR2              | MODERATE           | c.907C>A                                                                                      | p.Gln303Lys                                                                                 | 1 | FALSE | chr1:1627<br>31052:C:A | 51:chr1:16<br>2731052:C<br>:A | 0.000876 |
| 82_c2-b | 82 | CWH43             | MODERATE           | c.1495G>A<br>;<br>c.1576G>A                                                                   | p.Glu499Lys<br>;<br>p.Glu526Lys                                                             | 0 | FALSE | chr4:4903<br>4650:G:A  | 51:chr4:49<br>034650:G:<br>A  | 0.001174 |

|         |    |                    |                    |                                                                                         |                                                                   |     |       |                    |                       |          |
|---------|----|--------------------|--------------------|-----------------------------------------------------------------------------------------|-------------------------------------------------------------------|-----|-------|--------------------|-----------------------|----------|
| 48_c2-1 | 48 | NF1                | MODERATE           | c.8170G>A;<br>; c.8233G>A                                                               | p.Gly2724Arg;<br>; p.Gly2745Arg                                   | 2   | FALSE | chr17:29687577:G:A | 52:chr17:29687577:G:A | 0.002096 |
| 48_c2-1 | 48 | PHLPP1             | MODERATE           | c.2197G>A                                                                               | p.Val733Ile                                                       | 0   | FALSE | chr18:60562374:G:A | 52:chr18:60562374:G:A | 0.002384 |
| 48_c2-1 | 48 | PTEN               | MODERATE           | c.421C>A                                                                                | p.His141Asn                                                       | 2   | FALSE | chr10:89692937:C:A | 52:chr10:89692937:C:A | 0.003233 |
| 48_c2-1 | 48 | TP53               | MODERATE           | c.367C>T;<br>; c.448C>T;<br>; c.727C>T;<br>; c.844C>T                                   | p.Arg123Trp;<br>; p.Arg150Trp;<br>; p.Arg243Trp;<br>; p.Arg282Trp | 479 | FALSE | chr17:7577094:G:A  | 52:chr17:7577094:G:A  | 0.002304 |
| 48_c2-1 | 48 | TP53               | MODERATE           | c.110G>A;<br>; c.191G>A;<br>; c.470G>A;<br>; c.587G>A                                   | p.Arg37Gln;<br>; p.Arg64Gln;<br>; p.Arg157Gln;<br>; p.Arg196Gln   | 19  | FALSE | chr17:7578262:C:T  | 52:chr17:7578262:C:T  | 0.002128 |
| 48_c2-1 | 48 | NF1                | MODERATE           | c.2695T>G                                                                               | p.Leu899Val                                                       | 3   | FALSE | chr17:29556328:T:G | 52:chr17:29556328:T:G | 0.012461 |
| 48_c2-1 | 48 | PTEN               | HIGH               | c.633C>A                                                                                | p.Cys211*                                                         | 2   | FALSE | chr10:89712015:C:A | 52:chr10:89712015:C:A | 0.003049 |
| 48_c2-1 | 48 | TP53               | MODIFIER; MODERATE | c.*137A>G;<br>; c.*225A>G;<br>; c.1001A>G;<br>; c.1118A>G;<br>; c.641A>G;<br>; c.722A>G | p.Lys334Arg;<br>; p.Lys373Arg;<br>; p.Lys214Arg;<br>; p.Lys241Arg | 1   | FALSE | chr17:7572991:T:C  | 52:chr17:7572991:T:C  | 0.003436 |
| 48_c2-1 | 48 | CTNNB1             | MODERATE           | c.884C>A                                                                                | p.Ala295Asp                                                       | 0   | FALSE | chr3:41267300:C:A  | 52:chr3:41267300:C:A  | 0.002451 |
| 48_c2-1 | 48 | PHLPP1             | MODERATE           | c.2956G>A                                                                               | p.Asp986Asn                                                       | 0   | FALSE | chr18:60587343:G:A | 52:chr18:60587343:G:A | 0.002601 |
| 48_c2-1 | 48 | CTNNB1             | MODERATE           | c.1345C>T                                                                               | p.Arg449Cys                                                       | 0   | FALSE | chr3:41275179:C:T  | 52:chr3:41275179:C:T  | 0.001942 |
| 48_c2-1 | 48 | HOXD-AS2;<br>HOXD8 | MODIFIER; MODERATE | n.*692G>T;<br>; c.22C>A;<br>; c.574C>A                                                  | p.Gln8Lys;<br>; p.Gln192Lys                                       | 0   | FALSE | chr2:176995668:C:A | 52:chr2:176995668:C:A | 0.003367 |
| 48_c2-1 | 48 | MET                | HIGH               | c.1639C>T                                                                               | p.Arg547*                                                         | 2   | FALSE | chr7:116381017:C:T | 52:chr7:116381017:C:T | 0.003141 |

|         |    |        |                    |                                                                                     |                                                                         |    |       |                             |                                |          |
|---------|----|--------|--------------------|-------------------------------------------------------------------------------------|-------------------------------------------------------------------------|----|-------|-----------------------------|--------------------------------|----------|
| 48_c2-1 | 48 | PTEN   | MODERATE           | c.392C>A                                                                            | p.Thr131Asn                                                             | 2  | FALSE | chr10:896<br>92908:C:A      | 52:chr10:8<br>9692908:C<br>:A  | 0.003135 |
| 48_c2-1 | 48 | NF1    | MODERATE           | c.3559C>A                                                                           | p.Leu1187I<br>le                                                        | 1  | FALSE | chr17:295<br>60082:C:A      | 52:chr17:2<br>9560082:C<br>:A  | 0.002174 |
| 48_c3-2 | 48 | TP53   | MODERATE           | c.146G>T;<br>c.425G>T;<br>c.542G>T;<br>c.65G>T                                      | p.Arg49Leu;<br>p.Arg142Leu<br>;<br>p.Arg181Leu<br>; p.Arg22Leu          | 25 | FALSE | chr17:757<br>8388:C:A       | 53:chr17:7<br>578388:C:<br>A   | 0.001614 |
| 48_c3-2 | 48 | MET    | MODERATE           | c.1627G>A                                                                           | p.Asp543As<br>n                                                         | 1  | FALSE | chr7:1163<br>81005:G:A      | 53:chr7:11<br>6381005:G<br>:A  | 0.001417 |
| 48_c3-2 | 48 | HGF    | HIGH               | c.526C>T;<br>c.541C>T                                                               | p.Arg176*;<br>p.Arg181*                                                 | 0  | FALSE | chr7:8138<br>1520:G:A       | 53:chr7:81<br>381520:G:<br>A   | 0.001461 |
| 48_c3-2 | 48 | NF1    | MODERATE           | c.8070G>T<br>;<br>c.8133G>T                                                         | p.Leu2690P<br>he;<br>p.Leu2711P<br>he                                   | 1  | FALSE | chr17:296<br>86006:G:T      | 53:chr17:2<br>9686006:G<br>:T  | 0.004027 |
| 48_c3-2 | 48 | MET    | MODERATE           | c.3973G>A<br>;<br>c.4027G>A                                                         | p.Glu1325Ly<br>s;<br>p.Glu1343Ly<br>s                                   | 1  | FALSE | chr7:1164<br>35978:G:A      | 53:chr7:11<br>6435978:G<br>:A  | 0.001529 |
| 48_c3-2 | 48 | CTNNB1 | MODERATE           | c.91C>A                                                                             | p.Leu31Met                                                              | 0  | FALSE | chr3:4126<br>6094:C:A       | 53:chr3:41<br>266094:C:<br>A   | 0.001529 |
| 48_c3-2 | 48 | EGFR   | MODERATE           | c.3352G>A                                                                           | p.Ala1118Th<br>r                                                        | 3  | FALSE | chr7:5527<br>3029:G:A       | 53:chr7:55<br>273029:G:<br>A   | 0.001422 |
| 48_c3-2 | 48 | RET    | MODERATE           | c.1690A>C                                                                           | p.Thr564Pro                                                             | 1  | FALSE | chr10:436<br>08342:A:C      | 53:chr10:4<br>3608342:A<br>:C  | 0.006339 |
| 48_c3-2 | 48 | NF1    | MODERATE           | c.2695T>G                                                                           | p.Leu899Val                                                             | 3  | FALSE | chr17:295<br>56328:T:G      | 53:chr17:2<br>9556328:T<br>:G  | 0.006456 |
| 48_c3-2 | 48 | AKT1   | MODERATE           | c.1112C>T                                                                           | p.Thr371Me<br>t                                                         | 1  | FALSE | chr14:105<br>239275:G:<br>A | 53:chr14:1<br>05239275:<br>G:A | 0.001852 |
| 48_c3-2 | 48 | DDR2   | MODERATE           | c.1418G>A                                                                           | p.Arg473His                                                             | 2  | FALSE | chr1:1627<br>40216:G:A      | 53:chr1:16<br>2740216:G<br>:A  | 0.001415 |
| 48_c3-2 | 48 | TP53   | MODIFIER; MODERATE | c.*160G>T<br>;<br>c.*72G>T;<br>c.1053G>T<br>;<br>c.576G>T;<br>c.657G>T;<br>c.936G>T | p.Lys351Asn<br>;<br>p.Lys192Asn<br>;<br>p.Lys219Asn<br>;<br>p.Lys312Asn | 1  | FALSE | chr17:757<br>3974:C:A       | 53:chr17:7<br>573974:C:<br>A   | 0.001406 |
| 48_c3-2 | 48 | CWH43  | HIGH               | c.1250G>A<br>;<br>c.1331G>A                                                         | p.Trp417*;<br>p.Trp444*                                                 | 0  | FALSE | chr4:4903<br>0710:G:A       | 53:chr4:49<br>030710:G:<br>A   | 0.001536 |

|         |    |                             |                    |                                                                                               |                                                                         |      |       |                        |                               |          |
|---------|----|-----------------------------|--------------------|-----------------------------------------------------------------------------------------------|-------------------------------------------------------------------------|------|-------|------------------------|-------------------------------|----------|
| 48_c3-2 | 48 | BRAF                        | MODERATE           | c.1397G>T                                                                                     | p.Gly466Val                                                             | 18   | FALSE | chr7:1404<br>81411:C:A | 53:chr7:14<br>0481411:C<br>:A | 0.001425 |
| 48_c3-2 | 48 | DDR2                        | MODERATE           | c.313C>A                                                                                      | p.Arg105Ser                                                             | 2    | FALSE | chr1:1627<br>24541:C:A | 53:chr1:16<br>2724541:C<br>:A | 0.002102 |
| 48_c3-2 | 48 | CTNNB1                      | MODERATE           | c.1346G>A                                                                                     | p.Arg449His                                                             | 0    | FALSE | chr3:4127<br>5180:G:A  | 53:chr3:41<br>275180:G<br>:A  | 0.001298 |
| 48_c3-2 | 48 | HGF                         | MODERATE           | c.1172G>A<br>;<br>c.1187G>A                                                                   | p.Gly391Asp<br>;<br>p.Gly396Asp                                         | 0    | FALSE | chr7:8135<br>0145:C:T  | 53:chr7:81<br>350145:C<br>:T  | 0.001498 |
| 48_c3-2 | 48 | ERBB2;<br>MIEN1;<br>MIR4728 | MODERATE; MODIFIER | c.2720A>G<br>;<br>c.2765A>G<br>;<br>c.2810A>G<br>;<br>n.3134A>G<br>;<br>c.*388T>C;<br>n.-1A>G | p.Lys907Arg<br>;<br>p.Lys922Arg<br>;<br>p.Lys937Arg<br>;                | 1    | FALSE | chr17:378<br>82044:A:G | 53:chr17:3<br>7882044:A<br>:G | 0.001963 |
| 48_c3-2 | 48 | KRAS                        | MODERATE           | c.204G>T                                                                                      | p.Arg68Ser                                                              | 1    | FALSE | chr12:253<br>80254:C:A | 53:chr12:2<br>5380254:C<br>:A | 0.001479 |
| 48_c3-2 | 48 | PIK3CA                      | MODERATE           | c.518C>A                                                                                      | p.Ser173Tyr                                                             | 1    | FALSE | chr3:1789<br>17643:C:A | 53:chr3:17<br>8917643:C<br>:A | 0.001563 |
| 48_c3-2 | 48 | CTNNB1                      | MODERATE           | c.1166C>T                                                                                     | p.Ser389Leu                                                             | 0    | FALSE | chr3:4127<br>4916:C:T  | 53:chr3:41<br>274916:C<br>:T  | 0.001227 |
| 48_c3-2 | 48 | TP53                        | HIGH; MODIFIER     | c.184G>T;<br>c.67G>T; c.-<br>279G>T; c.-<br>360G>T                                            | p.Glu62*;<br>p.Glu23*;                                                  | 8    | FALSE | chr17:757<br>9503:C:A  | 53:chr17:7<br>579503:C<br>:A  | 0.005076 |
| 48_c3-2 | 48 | KRAS                        | MODERATE           | c.34G>T                                                                                       | p.Gly12Cys                                                              | 3755 | FALSE | chr12:253<br>98285:C:A | 53:chr12:2<br>5398285:C<br>:A | 0.002373 |
| 71_bl-1 | 71 | PIK3R1                      | MODERATE           | c.1702C>A<br>;<br>c.613C>A;<br>c.802C>A;<br>c.892C>A                                          | p.Pro568Thr<br>;<br>p.Pro205Thr<br>;<br>p.Pro268Thr<br>;<br>p.Pro298Thr | 1    | FALSE | chr5:6759<br>1109:C:A  | 54:chr5:67<br>591109:C<br>:A  | 0.000597 |
| 71_bl-1 | 71 | MET                         | HIGH               | c.1619G>A                                                                                     | p.Trp540*                                                               | 1    | FALSE | chr7:1163<br>80997:G:A | 54:chr7:11<br>6380997:G<br>:A | 0.000539 |
| 71_bl-1 | 71 | PIK3CA                      | MODERATE           | c.2102A>C                                                                                     | p.His701Pro                                                             | 6    | FALSE | chr3:1789<br>38860:A:C | 54:chr3:17<br>8938860:A<br>:C | 0.000644 |

|         |    |                   |                    |                                                                               |                                                                                             |    |       |                    |                       |          |
|---------|----|-------------------|--------------------|-------------------------------------------------------------------------------|---------------------------------------------------------------------------------------------|----|-------|--------------------|-----------------------|----------|
| 71_bl-1 | 71 | TP53              | MODERATE           | c.144G>T;<br>c.423G>T;<br>c.540G>T;<br>c.63G>T                                | p.Glu48Asp;<br>p.Glu141Asp;<br>p.Glu180Asp;<br>p.Glu21Asp                                   | 5  | FALSE | chr17:7578390:C:A  | 54:chr17:7578390:C:A  | 0.001031 |
| 71_bl-1 | 71 | MET               | HIGH               | c.1639C>T                                                                     | p.Arg547*                                                                                   | 2  | FALSE | chr7:116381017:C:T | 54:chr7:116381017:C:T | 0.000795 |
| 71_bl-1 | 71 | RPL19             | MODERATE           | c.452G>A                                                                      | p.Arg151His                                                                                 | 0  | FALSE | chr17:37360425:G:A | 54:chr17:37360425:G:A | 0.001145 |
| 71_bl-1 | 71 | EGFR;<br>EGFR-AS1 | MODERATE; MODIFIER | c.2568T>G;<br>n.-1A>C                                                         | p.Phe856Leu;                                                                                | 1  | FALSE | chr7:55259510:T:G  | 54:chr7:55259510:T:G  | 0.000661 |
| 71_bl-1 | 71 | FGFR1             | MODERATE           | c.1121C>T;<br>c.1139C>T;<br>c.1145C>T;<br>c.1238C>T;<br>c.872C>T;<br>c.878C>T | p.Thr374Ile;<br>p.Thr380Ile;<br>p.Thr382Ile;<br>p.Thr413Ile;<br>p.Thr291Ile;<br>p.Thr293Ile | 1  | FALSE | chr8:38277190:G:A  | 54:chr8:38277190:G:A  | 0.000623 |
| 71_bl-1 | 71 | RET               | HIGH               | c.1827C>A                                                                     | p.Cys609*                                                                                   | 1  | FALSE | chr10:43609071:C:A | 54:chr10:43609071:C:A | 0.000718 |
| 71_bl-1 | 71 | NF1               | MODERATE           | c.6031G>A;<br>c.6094G>A                                                       | p.Ala2011Thr;<br>p.Ala2032Thr                                                               | 1  | FALSE | chr17:29663438:G:A | 54:chr17:29663438:G:A | 0.0006   |
| 71_bl-1 | 71 | TP53              | MODERATE; MODIFIER | c.119C>T;<br>c.236C>T;<br>c.-279C>T;<br>c.-360C>T                             | p.Ala40Val;<br>p.Ala79Val;                                                                  | 2  | FALSE | chr17:7579451:G:A  | 54:chr17:7579451:G:A  | 0.000883 |
| 71_bl-1 | 71 | TP53              | MODERATE           | c.353G>T;<br>c.434G>T;<br>c.713G>T;<br>c.830G>T                               | p.Cys118Phe;<br>p.Cys145Phe;<br>p.Cys238Phe;<br>p.Cys277Phe                                 | 22 | FALSE | chr17:7577108:C:A  | 54:chr17:7577108:C:A  | 0.000741 |

|         |    |                             |                    |                                                                                               |                                                                         |     |       |                        |                                |          |
|---------|----|-----------------------------|--------------------|-----------------------------------------------------------------------------------------------|-------------------------------------------------------------------------|-----|-------|------------------------|--------------------------------|----------|
| 71_bl-1 | 71 | TP53                        | MODIFIER; MODERATE | c.*137A>G<br>;<br>c.*225A>G<br>;<br>c.1001A>G<br>;<br>c.1118A>G<br>;<br>c.641A>G;<br>c.722A>G | p.Lys334Arg<br>;<br>p.Lys373Arg<br>;<br>p.Lys214Arg<br>;<br>p.Lys241Arg | 1   | FALSE | chr17:757<br>2991:T:C  | 54:chr17:7<br>572991:T:<br>C   | 0.003673 |
| 71_bl-1 | 71 | CTNNB1                      | HIGH               | c.999C>A                                                                                      | p.Tyr333*                                                               | 0   | FALSE | chr3:4126<br>8761:C:A  | 54:chr3:41<br>268761:C:<br>A   | 0.000533 |
| 71_bl-1 | 71 | EPHA3                       | MODERATE           | c.497C>A                                                                                      | p.Thr166Asn                                                             | 0   | FALSE | chr3:8925<br>9353:C:A  | 54:chr3:89<br>259353:C:<br>A   | 0.000842 |
| 71_bl-1 | 71 | EGFR                        | MODERATE           | c.755G>A                                                                                      | p.Arg252His                                                             | 3   | FALSE | chr7:5522<br>1711:G:A  | 54:chr7:55<br>221711:G:<br>A   | 0.001019 |
| 71_bl-1 | 71 | MITF                        | MODIFIER; MODERATE | c.-<br>53+197C><br>A;<br>c.104+241<br>88C>A;<br>c.48C>A                                       | p.Phe16Leu                                                              | 0   | FALSE | chr3:6981<br>3040:C:A  | 54:chr3:69<br>813040:C:<br>A   | 0.000824 |
| 71_bl-1 | 71 | TP53                        | MODERATE; MODIFIER | c.140C>T;<br>c.23C>T; c.-<br>279C>T; c.-<br>360C>T                                            | p.Pro47Leu;<br>p.Pro8Leu;                                               | 2   | FALSE | chr17:757<br>9547:G:A  | 54:chr17:7<br>579547:G:<br>A   | 0.000938 |
| 71_bl-1 | 71 | KRAS                        | MODERATE           | c.108A>G                                                                                      | p.Ile36Met                                                              | 1   | FALSE | chr12:253<br>98211:T:C | 54:chr12:2<br>5398211:T<br>:C  | 0.000744 |
| 71_bl-1 | 71 | TP53                        | MODERATE           | c.341G>A;<br>c.422G>A;<br>c.701G>A;<br>c.818G>A                                               | p.Arg114His<br>;<br>p.Arg141His<br>;<br>p.Arg234His<br>;<br>p.Arg273His | 647 | TRUE  | chr17:757<br>7120:C:T  | 54:chr17:7<br>577120:C:<br>T   | 0.001478 |
| 71_bl-1 | 71 | ERBB2;<br>MIEN1;<br>MIR4728 | MODERATE; MODIFIER | c.2720A>G<br>;<br>c.2765A>G<br>;<br>c.2810A>G<br>;<br>n.3134A>G<br>;<br>c.*388T>C;<br>n.-1A>G | p.Lys907Arg<br>;<br>p.Lys922Arg<br>;<br>p.Lys937Arg                     | 1   | FALSE | chr17:378<br>82044:A:G | 54:chr17:3<br>7882044:A:<br>:G | 0.001537 |
| 71_bl-1 | 71 | NF1                         | MODERATE           | c.2695T>G                                                                                     | p.Leu899Val                                                             | 3   | FALSE | chr17:295<br>56328:T:G | 54:chr17:2<br>9556328:T<br>:G  | 0.006883 |

|         |    |        |                    |                                                                           |                                                                                                                 |    |       |                        |                               |          |
|---------|----|--------|--------------------|---------------------------------------------------------------------------|-----------------------------------------------------------------------------------------------------------------|----|-------|------------------------|-------------------------------|----------|
| 71_bl-1 | 71 | FGFR1  | MODERATE           | c.475C>T;<br>c.481C>T;<br>c.724C>T;<br>c.742C>T;<br>c.748C>T;<br>c.841C>T | p.Arg159Trp<br>;<br>p.Arg161Trp<br>;<br>p.Arg242Trp<br>;<br>p.Arg248Trp<br>;<br>p.Arg250Trp<br>;<br>p.Arg281Trp | 2  | FALSE | chr8:3828<br>2215:G:A  | 54:chr8:38<br>282215:G:<br>A  | 0.000591 |
| 71_bl-1 | 71 | PTEN   | MODERATE           | c.392C>A                                                                  | p.Thr131Asn                                                                                                     | 2  | FALSE | chr10:896<br>92908:C:A | 54:chr10:8<br>9692908:C<br>:A | 0.000644 |
| 71_bl-1 | 71 | TP53   | MODIFIER; MODERATE | c.-3G>T;<br>c.358G>T;<br>c.475G>T;<br>c.79G>T                             | p.Ala120Ser;<br>p.Ala159Ser;<br>p.Ala27Ser                                                                      | 23 | FALSE | chr17:757<br>8455:C:A  | 54:chr17:7<br>578455:C:<br>A  | 0.001283 |
| 71_bl-1 | 71 | PIK3CA | MODERATE           | c.3180C>A                                                                 | p.His1060Gl<br>n                                                                                                | 2  | FALSE | chr3:1789<br>52125:C:A | 54:chr3:17<br>8952125:C<br>:A | 0.00077  |
| 71_bl-1 | 71 | DDR2   | MODERATE           | c.1418G>A                                                                 | p.Arg473His                                                                                                     | 2  | FALSE | chr1:1627<br>40216:G:A | 54:chr1:16<br>2740216:G<br>:A | 0.000866 |
| 71_bl-1 | 71 | KIT    | MODERATE           | c.1485C>A                                                                 | p.Asn495Lys                                                                                                     | 1  | FALSE | chr4:5559<br>2161:C:A  | 54:chr4:55<br>592161:C:<br>A  | 0.000677 |
| 71_bl-1 | 71 | PTEN   | HIGH               | c.720C>A                                                                  | p.Tyr240*                                                                                                       | 3  | FALSE | chr10:897<br>17695:C:A | 54:chr10:8<br>9717695:C<br>:A | 0.000656 |
| 71_bl-1 | 71 | CTNNB1 | MODERATE           | c.953G>A                                                                  | p.Ser318Asn                                                                                                     | 0  | FALSE | chr3:4126<br>8715:G:A  | 54:chr3:41<br>268715:G:<br>A  | 0.000643 |
| 71_bl-1 | 71 | EGFR   | MODERATE           | c.719G>A                                                                  | p.Cys240Tyr                                                                                                     | 1  | FALSE | chr7:5522<br>0329:G:A  | 54:chr7:55<br>220329:G:<br>A  | 0.000617 |
| 71_bl-1 | 71 | TP53   | MODERATE; MODIFIER | c.257C>T;<br>c.374C>T;<br>c.-279C>T;<br>c.-360C>T                         | p.Thr86Met;<br>p.Thr125Me<br>t;                                                                                 | 18 | FALSE | chr17:757<br>9313:G:A  | 54:chr17:7<br>579313:G:<br>A  | 0.000804 |
| 71_bl-1 | 71 | MAP2K1 | MODERATE           | c.198C>A                                                                  | p.Asp66Glu                                                                                                      | 4  | FALSE | chr15:667<br>27482:C:A | 54:chr15:6<br>6727482:C<br>:A | 0.001386 |
| 71_bl-1 | 71 | CTNNB1 | MODERATE           | c.125C>A                                                                  | p.Thr42Lys                                                                                                      | 0  | FALSE | chr3:4126<br>6128:C:A  | 54:chr3:41<br>266128:C:<br>A  | 0.000926 |
| 71_bl-1 | 71 | TP53   | MODERATE           | c.164G>T;<br>c.443G>T;<br>c.560G>T;<br>c.83G>T                            | p.Gly55Val;<br>p.Gly148Val;<br>p.Gly187Val;<br>p.Gly28Val                                                       | 7  | FALSE | chr17:757<br>8289:C:A  | 54:chr17:7<br>578289:C:<br>A  | 0.000626 |



|         |    |        |                    |                                                                                                     |                                                                                                                 |   |       |                             |                                |          |
|---------|----|--------|--------------------|-----------------------------------------------------------------------------------------------------|-----------------------------------------------------------------------------------------------------------------|---|-------|-----------------------------|--------------------------------|----------|
| 71_bl-1 | 71 | RET    | MODERATE           | c.1690A>C                                                                                           | p.Thr564Pro                                                                                                     | 1 | FALSE | chr10:436<br>08342:A:C      | 54:chr10:4<br>3608342:A<br>:C  | 0.003811 |
| 71_bl-1 | 71 | ALK    | MODERATE           | c.206G>A                                                                                            | p.Arg69Gln                                                                                                      | 2 | FALSE | chr2:3014<br>3320:C:T       | 54:chr2:30<br>143320:C:<br>T   | 0.000891 |
| 71_bl-1 | 71 | CTNNB1 | MODERATE           | c.91C>A                                                                                             | p.Leu31Met                                                                                                      | 0 | FALSE | chr3:4126<br>6094:C:A       | 54:chr3:41<br>266094:C:<br>A   | 0.000632 |
| 71_bl-1 | 71 | NF1    | HIGH               | c.5817C>A<br>;<br>c.5880C>A                                                                         | p.Cys1939*;<br>p.Cys1960*                                                                                       | 1 | FALSE | chr17:296<br>61923:C:A      | 54:chr17:2<br>9661923:C<br>:A  | 0.001314 |
| 71_bl-1 | 71 | DDR2   | MODERATE           | c.2255G>A                                                                                           | p.Arg752His                                                                                                     | 1 | FALSE | chr1:1627<br>46132:G:A      | 54:chr1:16<br>2746132:G<br>:A  | 0.000513 |
| 71_bl-1 | 71 | ALK    | MODERATE           | c.617C>T                                                                                            | p.Ala206Val                                                                                                     | 2 | FALSE | chr2:3014<br>2909:G:A       | 54:chr2:30<br>142909:G:<br>A   | 0.001092 |
| 71_bl-1 | 71 | FGFR1  | MODERATE           | c.1070G>T<br>;<br>c.1076G>T<br>;<br>c.1313G>T<br>;<br>c.1337G>T<br>;<br>c.1343G>T<br>;<br>c.1436G>T | p.Arg357Leu<br>;<br>p.Arg359Leu<br>;<br>p.Arg438Leu<br>;<br>p.Arg446Leu<br>;<br>p.Arg448Leu<br>;<br>p.Arg479Leu | 1 | FALSE | chr8:3827<br>5833:C:A       | 54:chr8:38<br>275833:C:<br>A   | 0.000485 |
| 71_bl-1 | 71 | KIT    | MODERATE           | c.365G>A                                                                                            | p.Arg122His                                                                                                     | 1 | FALSE | chr4:5556<br>4477:G:A       | 54:chr4:55<br>564477:G:<br>A   | 0.001271 |
| 71_bl-1 | 71 | DDR2   | MODERATE           | c.313C>A                                                                                            | p.Arg105Ser                                                                                                     | 2 | FALSE | chr1:1627<br>24541:C:A      | 54:chr1:16<br>2724541:C<br>:A  | 0.001468 |
| 71_bl-1 | 71 | KIT    | MODERATE           | c.2570A>G<br>;<br>c.2582A>G                                                                         | p.Glu857Gly<br>;<br>p.Glu861Gly                                                                                 | 3 | FALSE | chr4:5560<br>2761:A:G       | 54:chr4:55<br>602761:A:<br>G   | 0.001053 |
| 71_bl-1 | 71 | TP53   | MODIFIER; MODERATE | c.-29C>T;<br>c.332C>T;<br>c.449C>T;<br>c.53C>T                                                      | p.Thr111Ile;<br>p.Thr150Ile;<br>p.Thr18Ile                                                                      | 4 | FALSE | chr17:757<br>8481:G:A       | 54:chr17:7<br>578481:G:<br>A   | 0.000895 |
| 71_bl-1 | 71 | AKT1   | MODERATE           | c.745C>T                                                                                            | p.Arg249Trp                                                                                                     | 1 | FALSE | chr14:105<br>239875:G:<br>A | 54:chr14:1<br>05239875:<br>G:A | 0.000629 |
| 71_bl-1 | 71 | PIK3R1 | MODERATE           | c.629C>A                                                                                            | p.Ala210Asp                                                                                                     | 1 | FALSE | chr5:6757<br>5556:C:A       | 54:chr5:67<br>575556:C:<br>A   | 0.000785 |
| 71_bl-1 | 71 | PIK3CA | MODERATE           | c.1615C>A                                                                                           | p.Pro539Thr                                                                                                     | 3 | FALSE | chr3:1789<br>36073:C:A      | 54:chr3:17<br>8936073:C<br>:A  | 0.000632 |

|         |    |       |                    |                                                         |                                                                    |     |       |                        |                               |          |
|---------|----|-------|--------------------|---------------------------------------------------------|--------------------------------------------------------------------|-----|-------|------------------------|-------------------------------|----------|
| 71_bl-1 | 71 | TP53  | MODERATE; MODIFIER | c.124G>T;<br>c.7G>T; c.-<br>279G>T; c.-<br>360G>T       | p.Asp42Tyr;<br>p.Asp3Tyr;                                          | 1   | FALSE | chr17:757<br>9563:C:A  | 54:chr17:7<br>579563:C:<br>A  | 0.000994 |
| 71_bl-1 | 71 | FGFR1 | MODIFIER; MODERATE | c.92-<br>1469C>T;<br>c.112C>T;<br>c.136C>T;<br>c.235C>T | ; p.His38Tyr;<br>p.His46Tyr;<br>p.His79Tyr                         | 1   | FALSE | chr8:3828<br>7422:G:A  | 54:chr8:38<br>287422:G:<br>A  | 0.000696 |
| 71_bl-1 | 71 | MET   | MODERATE           | c.3509G>A<br>;<br>c.3563G>A                             | p.Arg1170Gl<br>n;<br>p.Arg1188Gl<br>n                              | 1   | FALSE | chr7:1164<br>18998:G:A | 54:chr7:11<br>6418998:G<br>:A | 0.001178 |
| 71_bl-1 | 71 | KIT   | MODERATE           | c.235C>A                                                | p.Gln79Lys                                                         | 2   | FALSE | chr4:5556<br>1845:C:A  | 54:chr4:55<br>561845:C:<br>A  | 0.00051  |
| 71_bl-1 | 71 | DDR2  | MODERATE           | c.1963G>A                                               | p.Glu655Lys                                                        | 1   | FALSE | chr1:1627<br>45548:G:A | 54:chr1:16<br>2745548:G<br>:A | 0.001717 |
| 71_bl-1 | 71 | BRAF  | MODERATE           | c.338G>T                                                | p.Ser113Ile                                                        | 1   | FALSE | chr7:1405<br>34575:C:A | 54:chr7:14<br>0534575:C<br>:A | 0.000824 |
| 71_bl-1 | 71 | NF1   | MODERATE           | c.2659G>A                                               | p.Ala887Thr                                                        | 1   | FALSE | chr17:295<br>56292:G:A | 54:chr17:2<br>9556292:G<br>:A | 0.000545 |
| 71_bl-1 | 71 | ALK   | MODERATE           | c.3455T>C                                               | p.Leu1152Pr<br>o                                                   | 1   | FALSE | chr2:2944<br>5270:A:G  | 54:chr2:29<br>445270:A:<br>G  | 0.001436 |
| 71_bl-1 | 71 | AKT3  | MODERATE           | c.825G>T                                                | p.Glu275As<br>p                                                    | 0   | FALSE | chr1:2437<br>27145:C:A | 54:chr1:24<br>3727145:C<br>:A | 0.000828 |
| 71_bl-1 | 71 | MITF  | MODERATE           | c.157A>C;<br>c.265A>C;<br>c.310A>C;<br>c.313A>C         | p.Thr53Pro;<br>p.Thr89Pro;<br>p.Thr104Pro<br>;<br>p.Thr105Pro      | 0   | FALSE | chr3:6992<br>8493:A:C  | 54:chr3:69<br>928493:A:<br>C  | 0.000835 |
| 71_bl-1 | 71 | PTEN  | MODERATE           | c.443C>A                                                | p.Ala148Glu                                                        | 1   | FALSE | chr10:896<br>92959:C:A | 54:chr10:8<br>9692959:C<br>:A | 0.000781 |
| 71_bl-1 | 71 | TP53  | MODERATE           | c.270G>T;<br>c.351G>T;<br>c.630G>T;<br>c.747G>T         | p.Arg90Ser;<br>p.Arg117Ser<br>;<br>p.Arg210Ser<br>;<br>p.Arg249Ser | 318 | FALSE | chr17:757<br>7534:C:A  | 54:chr17:7<br>577534:C:<br>A  | 0.004719 |
| 71_bl-1 | 71 | FGFR1 | MODIFIER; MODERATE | c.-85G>T;<br>c.107G>T;<br>c.8G>T                        | ; p.Ser36Ile;<br>p.Ser3Ile                                         | 1   | FALSE | chr8:3831<br>4957:C:A  | 54:chr8:38<br>314957:C:<br>A  | 0.000548 |

|         |    |                 |                    |                                                                                                   |                                                                         |    |       |                        |                               |          |
|---------|----|-----------------|--------------------|---------------------------------------------------------------------------------------------------|-------------------------------------------------------------------------|----|-------|------------------------|-------------------------------|----------|
| 70_bl-1 | 70 | ALK             | MODERATE           | c.1753G>A                                                                                         | p.Ala585Thr                                                             | 3  | FALSE | chr2:2951<br>9818:C:T  | 55:chr2:29<br>519818:C:<br>T  | 0.0013   |
| 70_bl-1 | 70 | TP53            | MODIFIER; MODERATE | c.*117G>T<br>; c.*29G>T;<br>c.1010G>T<br>;<br>c.533G>T;<br>c.614G>T;<br>c.893G>T                  | p.Arg337Leu<br>;<br>p.Arg178Leu<br>;<br>p.Arg205Leu<br>;<br>p.Arg298Leu | 21 | FALSE | chr17:757<br>4017:C:A  | 55:chr17:7<br>574017:C:<br>A  | 0.792332 |
| 70_bl-1 | 70 | HGF             | MODERATE           | c.5G>T                                                                                            | p.Trp2Leu                                                               | 0  | FALSE | chr7:8139<br>9283:C:A  | 55:chr7:81<br>399283:C:<br>A  | 0.002835 |
| 70_bl-1 | 70 | TP53            | MODERATE; HIGH     | c.363G>T;<br>c.480G>T;<br>c.84G>T;<br>c.3G>T                                                      | p.Met121Ile<br>;<br>p.Met160Ile<br>;<br>p.Met28Ile;<br>p.Met1?          | 4  | FALSE | chr17:757<br>8450:C:A  | 55:chr17:7<br>578450:C:<br>A  | 0.002294 |
| 70_bl-1 | 70 | BRAF            | HIGH               | c.532C>T                                                                                          | p.Arg178*                                                               | 1  | FALSE | chr7:1405<br>08768:G:A | 55:chr7:14<br>0508768:G<br>:A | 0.000705 |
| 70_bl-1 | 70 | NF1             | MODERATE           | c.3559C>A                                                                                         | p.Leu1187Ile                                                            | 1  | FALSE | chr17:295<br>60082:C:A | 55:chr17:2<br>9560082:C<br>:A | 0.001367 |
| 70_bl-1 | 70 | PIK3CA          | MODERATE           | c.3180C>A                                                                                         | p.His1060Gln                                                            | 2  | FALSE | chr3:1789<br>52125:C:A | 55:chr3:17<br>8952125:C<br>:A | 0.000872 |
| 70_bl-1 | 70 | GAPDH;<br>IFFO1 | MODERATE; MODIFIER | c.591C>A;<br>c.717C>A;<br>c.*1743G><br>T;<br>c.*1746G><br>T;<br>c.*1770G><br>T;<br>n.*2798G><br>T | p.Asn197Lys<br>;<br>p.Asn239Lys<br>;                                    | 0  | FALSE | chr12:664<br>6941:C:A  | 55:chr12:6<br>646941:C:<br>A  | 0.001117 |
| 70_bl-1 | 70 | ERBB2           | MODERATE; MODIFIER | c.379C>T;<br>c.424C>T;<br>c.469C>T;<br>n.793C>T                                                   | p.Arg127Trp<br>;<br>p.Arg142Trp<br>;<br>p.Arg157Trp<br>;                | 1  | FALSE | chr17:378<br>65600:C:T | 55:chr17:3<br>7865600:C<br>:T | 0.00109  |
| 70_bl-1 | 70 | PTEN            | MODERATE           | c.743C>A                                                                                          | p.Pro248His                                                             | 4  | FALSE | chr10:897<br>17718:C:A | 55:chr10:8<br>9717718:C<br>:A | 0.003093 |
| 70_bl-1 | 70 | NF1             | HIGH               | c.5294C>A<br>;<br>c.5357C>A                                                                       | p.Ser1765*;<br>p.Ser1786*                                               | 1  | FALSE | chr17:296<br>54605:C:A | 55:chr17:2<br>9654605:C<br>:A | 0.001049 |

|         |    |        |                    |                                                                                 |                                                                                                                 |    |       |                        |                               |          |
|---------|----|--------|--------------------|---------------------------------------------------------------------------------|-----------------------------------------------------------------------------------------------------------------|----|-------|------------------------|-------------------------------|----------|
| 70_bl-1 | 70 | PTEN   | MODERATE           | c.443C>A                                                                        | p.Ala148Glu                                                                                                     | 1  | FALSE | chr10:896<br>92959:C:A | 55:chr10:8<br>9692959:C<br>:A | 0.002107 |
| 70_bl-1 | 70 | MET    | MODERATE           | c.3973G>A<br>;<br>c.4027G>A                                                     | p.Glu1325Lys<br>;<br>p.Glu1343Lys                                                                               | 1  | FALSE | chr7:1164<br>35978:G:A | 55:chr7:11<br>6435978:G<br>:A | 0.000841 |
| 70_bl-1 | 70 | BRAF   | MODERATE           | c.1796C>T                                                                       | p.Thr599Ile                                                                                                     | 4  | FALSE | chr7:1404<br>53139:G:A | 55:chr7:14<br>0453139:G<br>:A | 0.000866 |
| 70_bl-1 | 70 | NF1    | LOW                | c.1641G>A                                                                       | p.Glu547Glu                                                                                                     | 1  | FALSE | chr17:295<br>46136:G:A | 55:chr17:2<br>9546136:G<br>:A | 0.001358 |
| 70_bl-1 | 70 | PIK3CA | MODERATE           | c.3076C>A                                                                       | p.Leu1026Ile                                                                                                    | 1  | FALSE | chr3:1789<br>52021:C:A | 55:chr3:17<br>8952021:C<br>:A | 0.000821 |
| 70_bl-1 | 70 | CTNNB1 | MODERATE           | c.884C>A                                                                        | p.Ala295Asp                                                                                                     | 0  | FALSE | chr3:4126<br>7300:C:A  | 55:chr3:41<br>267300:C:<br>A  | 0.002946 |
| 70_bl-1 | 70 | FGFR1  | MODERATE           | c.1060C>T;<br>c.1066C>T;<br>c.1303C>T;<br>c.1327C>T;<br>c.1333C>T;<br>c.1426C>T | p.Arg354Trp<br>;<br>p.Arg356Trp<br>;<br>p.Arg435Trp<br>;<br>p.Arg443Trp<br>;<br>p.Arg445Trp<br>;<br>p.Arg476Trp | 2  | FALSE | chr8:3827<br>5843:G:A  | 55:chr8:38<br>275843:G:<br>A  | 0.001817 |
| 70_bl-1 | 70 | EGFR   | MODIFIER; MODERATE | c.*2364C><br>T;<br>c.2165C>T                                                    | p.Ala722Val                                                                                                     | 2  | FALSE | chr7:5524<br>1717:C:T  | 55:chr7:55<br>241717:C:<br>T  | 0.001451 |
| 70_bl-1 | 70 | PTEN   | MODERATE           | c.392C>A                                                                        | p.Thr131Asn                                                                                                     | 2  | FALSE | chr10:896<br>92908:C:A | 55:chr10:8<br>9692908:C<br>:A | 0.001656 |
| 70_bl-1 | 70 | HGF    | MODERATE           | c.2157G>T<br>;<br>c.2172G>T                                                     | p.Lys719Asn<br>;<br>p.Lys724Asn                                                                                 | 0  | FALSE | chr7:8133<br>1912:C:A  | 55:chr7:81<br>331912:C:<br>A  | 0.001585 |
| 70_bl-1 | 70 | PTEN   | MODERATE           | c.729C>A                                                                        | p.Phe243Leu                                                                                                     | 1  | FALSE | chr10:897<br>17704:C:A | 55:chr10:8<br>9717704:C<br>:A | 0.002049 |
| 70_bl-1 | 70 | TP53   | MODERATE           | c.105G>T;<br>c.24G>T;<br>c.384G>T;<br>c.501G>T                                  | p.Gln35His;<br>p.Gln8His;<br>p.Gln128His<br>;<br>p.Gln167His                                                    | 3  | FALSE | chr17:757<br>8429:C:A  | 55:chr17:7<br>578429:C:<br>A  | 0.002039 |
| 70_bl-1 | 70 | TP53   | MODERATE           | c.121G>T;<br>c.400G>T;<br>c.40G>T;<br>c.517G>T                                  | p.Val41Leu;<br>p.Val134Leu<br>;<br>p.Val14Leu;<br>p.Val173Leu                                                   | 55 | FALSE | chr17:757<br>8413:C:A  | 55:chr17:7<br>578413:C:<br>A  | 0.001942 |

|         |    |       |                    |                                                                 |                                                               |     |       |                        |                               |          |
|---------|----|-------|--------------------|-----------------------------------------------------------------|---------------------------------------------------------------|-----|-------|------------------------|-------------------------------|----------|
| 70_bl-1 | 70 | NF1   | HIGH               | c.5817C>A;<br>c.5880C>A                                         | p.Cys1939*;<br>p.Cys1960*                                     | 1   | FALSE | chr17:296<br>61923:C:A | 55:chr17:2<br>9661923:C<br>:A | 0.001698 |
| 70_bl-1 | 70 | NF1   | MODERATE           | c.7405G>A;<br>c.7468G>A                                         | p.Glu2469Ly<br>s;<br>p.Glu2490Ly<br>s                         | 1   | FALSE | chr17:296<br>79285:G:A | 55:chr17:2<br>9679285:G<br>:A | 0.002016 |
| 70_bl-1 | 70 | ALK   | MODERATE           | c.741G>T                                                        | p.Trp247Cys                                                   | 1   | FALSE | chr2:2994<br>0490:C:A  | 55:chr2:29<br>940490:C:<br>A  | 0.001552 |
| 70_bl-1 | 70 | KRAS  | HIGH               | c.292G>T                                                        | p.Glu98*                                                      | 1   | FALSE | chr12:253<br>78706:C:A | 55:chr12:2<br>5378706:C<br>:A | 0.0025   |
| 70_bl-1 | 70 | NF1   | MODERATE           | c.2695T>G                                                       | p.Leu899Val                                                   | 3   | FALSE | chr17:295<br>56328:T:G | 55:chr17:2<br>9556328:T<br>:G | 0.013536 |
| 70_bl-1 | 70 | TP53  | HIGH; MODIFIER     | c.184G>T;<br>c.67G>T; c.<br>279G>T; c.<br>360G>T                | p.Glu62*;<br>p.Glu23*;                                        | 8   | FALSE | chr17:757<br>9503:C:A  | 55:chr17:7<br>579503:C:<br>A  | 0.004386 |
| 70_bl-1 | 70 | ROS1  | MODERATE           | c.5185G>T                                                       | p.Val1729Le<br>u                                              | 1   | FALSE | chr6:1176<br>58398:C:A | 55:chr6:11<br>7658398:C<br>:A | 0.001228 |
| 70_bl-1 | 70 | HGF   | HIGH               | c.1993G>T<br>;<br>c.2008G>T                                     | p.Glu665*;<br>p.Glu670*                                       | 0   | FALSE | chr7:8133<br>4708:C:A  | 55:chr7:81<br>334708:C:<br>A  | 0.0027   |
| 70_bl-1 | 70 | DDR2  | MODERATE           | c.313C>A                                                        | p.Arg105Ser                                                   | 2   | FALSE | chr1:1627<br>24541:C:A | 55:chr1:16<br>2724541:C<br>:A | 0.002484 |
| 70_bl-1 | 70 | DDR2  | MODERATE           | c.1963G>A                                                       | p.Glu655Lys                                                   | 1   | FALSE | chr1:1627<br>45548:G:A | 55:chr1:16<br>2745548:G<br>:A | 0.002401 |
| 70_bl-1 | 70 | TP53  | MODERATE           | c.131G>A;<br>c.410G>A;<br>c.50G>A;<br>c.527G>A                  | p.Cys44Tyr;<br>p.Cys137Tyr<br>;<br>p.Cys17Tyr;<br>p.Cys176Tyr | 143 | FALSE | chr17:757<br>8403:C:T  | 55:chr17:7<br>578403:C:<br>T  | 0.00189  |
| 70_bl-1 | 70 | TP53  | MODIFIER; MODERATE | c.-9G>T;<br>c.352G>T;<br>c.469G>T;<br>c.73G>T                   | p.Val118Phe<br>;<br>p.Val157Phe<br>;<br>p.Val25Phe            | 169 | FALSE | chr17:757<br>8461:C:A  | 55:chr17:7<br>578461:C:<br>A  | 0.00358  |
| 70_bl-1 | 70 | ERBB2 | MODERATE; MODIFIER | c.1180G>A<br>;<br>c.1225G>A<br>;<br>c.1270G>A<br>;<br>n.1594G>A | p.Val394Ile;<br>p.Val409Ile;<br>p.Val424Ile;                  | 1   | FALSE | chr17:378<br>71746:G:A | 55:chr17:3<br>7871746:G<br>:A | 0.001316 |

|         |    |                             |                    |                                                                                                                   |                                                                    |     |       |                             |                                |          |
|---------|----|-----------------------------|--------------------|-------------------------------------------------------------------------------------------------------------------|--------------------------------------------------------------------|-----|-------|-----------------------------|--------------------------------|----------|
| 70_bl-1 | 70 | FGFR1                       | MODIFIER; MODERATE | c.-85G>T;<br>c.107G>T;<br>c.8G>T                                                                                  | ; p.Ser36Ile;<br>p.Ser3Ile                                         | 1   | FALSE | chr8:3831<br>4957:C:A       | 55:chr8:38<br>314957:C:<br>A   | 0.003112 |
| 70_bl-1 | 70 | ERBB2;<br>MIEN1;<br>MIR4728 | MODIFIER; MODERATE | c.*174C>A<br>;<br>c.3505C>A<br>;<br>c.3550C>A<br>;<br>c.3595C>A<br>;<br>n.3919C>A<br>;<br>c.*388G>T<br>; n.*67C>A | p.Pro1169T<br>hr;<br>p.Pro1184T<br>hr;<br>p.Pro1199T<br>hr         | 2   | FALSE | chr17:378<br>84124:C:A      | 55:chr17:3<br>7884124:C<br>:A  | 0.001096 |
| 70_bl-1 | 70 | ALK                         | HIGH               | c.4414G>T                                                                                                         | p.Glu1472*                                                         | 1   | FALSE | chr2:2941<br>6539:C:A       | 55:chr2:29<br>416539:C:<br>A   | 0.001114 |
| 70_bl-1 | 70 | MET                         | MODERATE           | c.470A>G                                                                                                          | p.Glu157Gly                                                        | 1   | FALSE | chr7:1163<br>39608:A:G      | 55:chr7:11<br>6339608:A<br>:G  | 0.000697 |
| 5_pro-2 | 5  | KLLN;<br>PTEN               | MODIFIER; MODERATE | c.-951C>T;<br>c.32G>A                                                                                             | ; p.Arg11Lys                                                       | 1   | FALSE | chr10:896<br>24258:G:A      | 56:chr10:8<br>9624258:G<br>:A  | 0.003559 |
| 5_pro-2 | 5  | SMO                         | MODERATE           | c.1045A>C                                                                                                         | p.Thr349Pro                                                        | 0   | FALSE | chr7:1288<br>46115:A:C      | 56:chr7:12<br>8846115:A<br>:C  | 0.002717 |
| 5_pro-2 | 5  | TP53                        | MODERATE           | c.110G>A;<br>c.191G>A;<br>c.470G>A;<br>c.587G>A                                                                   | p.Arg37Gln;<br>p.Arg64Gln;<br>p.Arg157Gln<br>;<br>p.Arg196Gln      | 19  | FALSE | chr17:757<br>8262:C:T       | 56:chr17:7<br>578262:C:<br>T   | 0.004505 |
| 5_pro-2 | 5  | TP53                        | MODERATE           | c.256G>C;<br>c.337G>C;<br>c.616G>C;<br>c.733G>C                                                                   | p.Gly86Arg;<br>p.Gly113Arg<br>;<br>p.Gly206Arg<br>;<br>p.Gly245Arg | 361 | FALSE | chr17:757<br>7548:C:G       | 56:chr17:7<br>577548:C:<br>G   | 0.004021 |
| 5_pro-2 | 5  | ATM                         | HIGH               | c.4852C>T                                                                                                         | p.Arg1618*                                                         | 0   | FALSE | chr11:108<br>165729:C:<br>T | 56:chr11:1<br>08165729:<br>C:T | 0.002751 |
| 5_pro-2 | 5  | MIR4673;<br>NOTCH1          | MODIFIER; MODERATE | n.-1C>T;<br>c.368C>T                                                                                              | ; p.Thr123Me<br>t                                                  | 0   | FALSE | chr9:1394<br>18204:G:A      | 56:chr9:13<br>9418204:G<br>:A  | 0.003795 |
| 5_pro-2 | 5  | PDGFRA                      | MODERATE           | c.2152C>T                                                                                                         | p.Arg718Trp                                                        | 1   | FALSE | chr4:5514<br>4678:C:T       | 56:chr4:55<br>144678:C:<br>T   | 0.002797 |

|        |   |                 |                    |                                                                                                                                                                                |                                                                                                                      |     |       |                        |                               |          |
|--------|---|-----------------|--------------------|--------------------------------------------------------------------------------------------------------------------------------------------------------------------------------|----------------------------------------------------------------------------------------------------------------------|-----|-------|------------------------|-------------------------------|----------|
| 4_bl-b | 4 | FGFR1;<br>LETM2 | MODERATE; MODIFIER | c.2126C>T;<br>c.2132C>T;<br>c.2369C>T;<br>c.2393C>T;<br>c.2399C>T;<br>c.2492C>T;<br>c.*1406G><br>A;<br>c.*1423G><br>A;<br>c.*1553G><br>A;<br>c.*1567G><br>A;<br>c.*1638G><br>A | p.Pro709Leu<br>;<br>p.Pro711Leu<br>;<br>p.Pro790Leu<br>;<br>p.Pro798Leu<br>;<br>p.Pro800Leu<br>;<br>p.Pro831Leu<br>; | 1   | FALSE | chr8:3827<br>1216:G:A  | 57:chr8:38<br>271216:G:<br>A  | 0.001404 |
| 4_bl-b | 4 | KRAS            | MODERATE           | c.182A>G                                                                                                                                                                       | p.Gln61Arg                                                                                                           | 92  | FALSE | chr12:253<br>80276:T:C | 57:chr12:2<br>5380276:T<br>:C | 0.106092 |
| 4_bl-b | 4 | FGFR3           | MODIFIER; MODERATE | c.931-<br>417C>A;<br>c.1153C>A<br>;<br>c.1159C>A                                                                                                                               | ; p.Leu385Me<br>t;<br>p.Leu387Me<br>t                                                                                | 1   | FALSE | chr4:1806<br>134:C:A   | 57:chr4:18<br>06134:C:A       | 0.00158  |
| 4_bl-b | 4 | PDGFRA          | MODERATE           | c.1516C>A                                                                                                                                                                      | p.Leu506Ile                                                                                                          | 2   | FALSE | chr4:5513<br>9855:C:A  | 57:chr4:55<br>139855:C:<br>A  | 0.001264 |
| 4_bl-b | 4 | IDH1            | MODERATE           | c.299G>T                                                                                                                                                                       | p.Arg100Leu                                                                                                          | 5   | FALSE | chr2:2091<br>13208:C:A | 57:chr2:20<br>9113208:C<br>:A | 0.001389 |
| 4_bl-b | 4 | TP53            | MODERATE           | c.113C>T;<br>c.32C>T;<br>c.392C>T;<br>c.509C>T                                                                                                                                 | p.Thr38Met;<br>p.Thr11Met;<br>p.Thr131Me<br>t;<br>p.Thr170Me<br>t                                                    | 8   | FALSE | chr17:757<br>8421:G:A  | 57:chr17:7<br>578421:G:<br>A  | 0.001503 |
| 4_bl-b | 4 | MAP2K1          | MODERATE           | c.602G>A                                                                                                                                                                       | p.Arg201His                                                                                                          | 2   | FALSE | chr15:667<br>74126:G:A | 57:chr15:6<br>6774126:G<br>:A | 0.001565 |
| 4_bl-b | 4 | PDGFRA          | MODERATE           | c.401C>T                                                                                                                                                                       | p.Thr134Me<br>t                                                                                                      | 3   | FALSE | chr4:5512<br>9867:C:T  | 57:chr4:55<br>129867:C:<br>T  | 0.001255 |
| 4_bl-b | 4 | PIK3CA          | MODERATE           | c.241G>A                                                                                                                                                                       | p.Glu81Lys                                                                                                           | 38  | FALSE | chr3:1789<br>16854:G:A | 57:chr3:17<br>8916854:G<br>:A | 0.001296 |
| 4_bl-b | 4 | TP53            | MODERATE           | c.266G>A;<br>c.347G>A;<br>c.626G>A;<br>c.743G>A                                                                                                                                | p.Arg89Gln;<br>p.Arg116Gln<br>;<br>p.Arg209Gln<br>;<br>p.Arg248Gln                                                   | 673 | FALSE | chr17:757<br>7538:C:T  | 57:chr17:7<br>577538:C:<br>T  | 0.001983 |

|        |   |                             |                    |                                                                                                                      |                                                                    |     |       |                             |                                |          |
|--------|---|-----------------------------|--------------------|----------------------------------------------------------------------------------------------------------------------|--------------------------------------------------------------------|-----|-------|-----------------------------|--------------------------------|----------|
| 4_bl-b | 4 | AKT1                        | MODERATE           | c.49G>A                                                                                                              | p.Glu17Lys                                                         | 287 | FALSE | chr14:105<br>246551:C:<br>T | 57:chr14:1<br>05246551:<br>C:T | 0.092537 |
| 4_bl-b | 4 | CTNNB1                      | MODERATE           | c.91C>A                                                                                                              | p.Leu31Met                                                         | 0   | FALSE | chr3:4126<br>6094:C:A       | 57:chr3:41<br>266094:C:<br>A   | 0.001322 |
| 4_bl-b | 4 | DDR2                        | MODERATE           | c.2516G>A                                                                                                            | p.Arg839His                                                        | 3   | FALSE | chr1:1627<br>49984:G:A      | 57:chr1:16<br>2749984:G<br>:A  | 0.001259 |
| 4_bl-b | 4 | CDKN2A;<br>CDKN2B-<br>AS1   | MODERATE; MODIFIER | c.22A>G;<br>n.-1T>C                                                                                                  | p.Thr8Ala;                                                         | 1   | FALSE | chr9:2199<br>4309:T:C       | 57:chr9:21<br>994309:T:<br>C   | 0.00578  |
| 4_bl-b | 4 | TP53                        | MODERATE           | c.236G>A;<br>c.317G>A;<br>c.596G>A;<br>c.713G>A                                                                      | p.Cys79Tyr;<br>p.Cys106Tyr<br>;<br>p.Cys199Tyr<br>;<br>p.Cys238Tyr | 74  | FALSE | chr17:757<br>7568:C:T       | 57:chr17:7<br>577568:C:<br>T   | 0.001254 |
| 4_bl-b | 4 | FBXW7                       | MODERATE           | c.1078G>T<br>;<br>c.1318G>T<br>; c.964G>T                                                                            | p.Asp360Tyr<br>;<br>p.Asp440Tyr<br>;<br>p.Asp322Tyr                | 0   | FALSE | chr4:1532<br>49460:C:A      | 57:chr4:15<br>3249460:C<br>:A  | 0.002075 |
| 4_bl-b | 4 | TP53                        | MODERATE           | c.103C>T;<br>c.184C>T;<br>c.463C>T;<br>c.580C>T                                                                      | p.Leu35Phe;<br>p.Leu62Phe;<br>p.Leu155Ph<br>e;<br>p.Leu194Ph<br>e  | 22  | FALSE | chr17:757<br>8269:G:A       | 57:chr17:7<br>578269:G:<br>A   | 0.001491 |
| 4_bl-b | 4 | GNA11                       | MODERATE           | c.196G>A                                                                                                             | p.Gly66Ser                                                         | 2   | FALSE | chr19:311<br>0206:G:A       | 57:chr19:3<br>110206:G:<br>A   | 0.00154  |
| 4_bl-b | 4 | NOTCH1                      | MODERATE           | c.5885G>A                                                                                                            | p.Arg1962Hi<br>s                                                   | 0   | FALSE | chr9:1393<br>95053:C:T      | 57:chr9:13<br>9395053:C:<br>T  | 0.001601 |
| 4_bl-b | 4 | C9orf53;<br>CDKN2A          | MODIFIER; MODERATE | n.*616C>G<br>;<br>c.*140G>C<br>;<br>c.217G>C;<br>c.260G>C                                                            | p.Ala73Pro;<br>p.Arg87Pro                                          | 1   | FALSE | chr9:2197<br>1141:C:G       | 57:chr9:21<br>971141:C:<br>G   | 0.018732 |
| 4_bl-b | 4 | ERBB2;<br>MIEN1;<br>MIR4728 | MODIFIER; MODERATE | c.3160-<br>213A>G;<br>c.3251A>G<br>;<br>c.3296A>G<br>;<br>c.3341A>G<br>;<br>n.3665A>G<br>;<br>c.*388T>C;<br>n.*67A>G | p.Glu1084Gl<br>y;<br>p.Glu1099Gl<br>y;<br>p.Glu1114Gl<br>y         | 1   | FALSE | chr17:378<br>83729:A:G      | 57:chr17:3<br>7883729:A<br>:G  | 0.001494 |



|        |   |                             |                    |                                                                                                                      |                                                                |       |       |                         |                                |          |
|--------|---|-----------------------------|--------------------|----------------------------------------------------------------------------------------------------------------------|----------------------------------------------------------------|-------|-------|-------------------------|--------------------------------|----------|
| 4_bl-b | 4 | CTNNB1                      | MODERATE           | c.1723G>A                                                                                                            | p.Gly575Arg                                                    | 0     | FALSE | chr3:4127<br>7254:G:A   | 57:chr3:41<br>277254:G:A       | 0.001674 |
| 4_bl-b | 4 | KDR                         | HIGH               | c.823C>T                                                                                                             | p.Arg275*                                                      | 3     | FALSE | chr4:5597<br>9624:G:A   | 57:chr4:55<br>979624:G:A       | 0.001358 |
| 4_bl-b | 4 | NTRK1                       | MODERATE           | c.804C>G;<br>c.894C>G                                                                                                | p.His268Gln<br>;<br>p.His298Gln                                | 1     | FALSE | chr1:1568<br>43468:C:G  | 57:chr1:15<br>6843468:C<br>:G  | 0.00321  |
| 4_bl-b | 4 | TP53                        | MODERATE           | c.152C>T;<br>c.431C>T;<br>c.548C>T;<br>c.71C>T                                                                       | p.Ser51Leu;<br>p.Ser144Leu<br>;<br>p.Ser183Leu<br>; p.Ser24Leu | 26    | FALSE | chr17:757<br>8382:G:A   | 57:chr17:7<br>578382:G:A       | 0.001403 |
| 7_bl-1 | 7 | CTNNB1                      | MODERATE           | c.98C>A                                                                                                              | p.Ser33Tyr                                                     | 0     | FALSE | chr3:4126<br>6101:C:A   | 58:chr3:41<br>266101:C:A       | 0.002051 |
| 7_bl-1 | 7 | FBXW7                       | MODERATE           | c.1444G>T<br>;<br>c.1558G>T<br>;<br>c.1798G>T                                                                        | p.Asp482Tyr<br>;<br>p.Asp520Tyr<br>;<br>p.Asp600Tyr            | 0     | FALSE | chr4:1532<br>45393:C:A  | 58:chr4:15<br>3245393:C<br>:A  | 0.002169 |
| 7_bl-1 | 7 | ERBB2;<br>MIEN1;<br>MIR4728 | MODIFIER; MODERATE | c.3160-<br>213A>G;<br>c.3251A>G<br>;<br>c.3296A>G<br>;<br>c.3341A>G<br>;<br>n.3665A>G<br>;<br>c.*388T>C;<br>n.*67A>G | p.Glu1084Gl<br>y;<br>p.Glu1099Gl<br>y;<br>p.Glu1114Gl<br>y     | 1     | FALSE | chr17:378<br>83729:A:G  | 58:chr17:3<br>7883729:A<br>:G  | 0.002421 |
| 7_bl-1 | 7 | KIT                         | MODERATE           | c.1156G>A                                                                                                            | p.Glu386Lys                                                    | 1     | FALSE | chr4:5557<br>5630:G:A   | 58:chr4:55<br>575630:G:A       | 0.003916 |
| 7_bl-1 | 7 | ATM                         | MODERATE           | c.6200C>A                                                                                                            | p.Ala2067As<br>p                                               | 0     | FALSE | chr11:108<br>188101:C:A | 58:chr11:1<br>08188101:C<br>:A | 0.003012 |
| 7_bl-1 | 7 | FBXW7                       | MODERATE           | c.182G>A;<br>c.296G>A;<br>c.536G>A                                                                                   | p.Arg61His;<br>p.Arg99His;<br>p.Arg179His                      | 0     | FALSE | chr4:1532<br>71242:C:T  | 58:chr4:15<br>3271242:C<br>:T  | 0.00216  |
| 7_bl-1 | 7 | RET                         | MODERATE           | c.1690A>C                                                                                                            | p.Thr564Pro                                                    | 1     | FALSE | chr10:436<br>08342:A:C  | 58:chr10:4<br>3608342:A<br>:C  | 0.002191 |
| 7_bl-1 | 7 | MAP2K1                      | MODERATE           | c.140G>A                                                                                                             | p.Arg47Gln                                                     | 4     | FALSE | chr15:667<br>27424:G:A  | 58:chr15:6<br>6727424:G<br>:A  | 0.002222 |
| 7_bl-1 | 7 | BRAF                        | MODERATE           | c.1799T>A                                                                                                            | p.Val600Glu                                                    | 23024 | FALSE | chr7:1404<br>53136:A:T  | 58:chr7:14<br>0453136:A<br>:T  | 0.004338 |

|         |  |                                         |                    |                                                   |                             |   |       |                        |                               |          |
|---------|--|-----------------------------------------|--------------------|---------------------------------------------------|-----------------------------|---|-------|------------------------|-------------------------------|----------|
| 7_bl-1  |  | FOXL2;<br>FOXL2NB;<br>7 LINC01391       | MODERATE; MODIFIER | c.282T>A;<br>c.-132A>T;<br>n.-1T>A                | p.Asn94Lys;                 | 0 | FALSE | chr3:1386<br>65283:A:T | 58:chr3:13<br>8665283:A<br>:T | 0.008969 |
| 7_bl-1  |  |                                         | MODERATE           | c.1960C>A<br>;<br>c.2008C>A                       | p.Leu654Met;<br>p.Leu670Met | 0 | FALSE | chr9:8757<br>0268:C:A  | 58:chr9:87<br>570268:C:<br>A  | 0.002326 |
| 7_bl-1  |  |                                         | MODERATE           | c.1045A>C                                         | p.Thr349Pro                 | 0 | FALSE | chr7:1288<br>46115:A:C | 58:chr7:12<br>8846115:A<br>:C | 0.003378 |
| 7_bl-1  |  |                                         | MODERATE           | c.2323G>A                                         | p.Ala775Thr                 | 1 | FALSE | chr4:5596<br>4914:C:T  | 58:chr4:55<br>964914:C:<br>T  | 0.002058 |
| 7_bl-1  |  |                                         | MODERATE; MODIFIER | c.115G>T;<br>c.232G>T;<br>c.-279G>T;<br>c.-360G>T | p.Ala39Ser;<br>p.Ala78Ser;  | 1 | FALSE | chr17:757<br>9455:C:A  | 58:chr17:7<br>579455:C:<br>A  | 0.002516 |
| 11_bl-1 |  |                                         | MODERATE           | c.313C>A                                          | p.Arg105Ser                 | 2 | FALSE | chr1:1627<br>24541:C:A | 59:chr1:16<br>2724541:C<br>:A | 0.001259 |
| 11_bl-1 |  |                                         | MODERATE           | c.685G>A                                          | p.Glu229Lys                 | 3 | FALSE | chr4:5513<br>1142:G:A  | 59:chr4:55<br>131142:G:<br>A  | 0.001235 |
| 11_bl-1 |  |                                         | MODERATE           | c.425G>T                                          | p.Arg142Ile                 | 0 | FALSE | chr1:2438<br>09199:C:A | 59:chr1:24<br>3809199:C<br>:A | 0.001538 |
| 11_bl-1 |  | INSRR;<br>11 NTRK1                      | MODIFIER; MODERATE | c.3397+13<br>C>T;<br>c.28G>A                      | ; p.Ala10Thr                | 1 | FALSE | chr1:1568<br>11891:G:A | 59:chr1:15<br>6811891:G<br>:A | 0.001133 |
| 11_bl-1 |  |                                         | MODERATE           | c.440G>A                                          | p.Arg147His                 | 1 | FALSE | chr19:311<br>3446:G:A  | 59:chr19:3<br>113446:G:<br>A  | 0.001405 |
| 11_bl-1 |  |                                         | MODERATE           | c.1690A>C                                         | p.Thr564Pro                 | 1 | FALSE | chr10:436<br>08342:A:C | 59:chr10:4<br>3608342:A<br>:C | 0.002639 |
| 11_bl-1 |  |                                         | MODERATE           | c.1045A>C                                         | p.Thr349Pro                 | 0 | FALSE | chr7:1288<br>46115:A:C | 59:chr7:12<br>8846115:A<br>:C | 0.002572 |
| 11_bl-1 |  |                                         | MODERATE           | c.1099C>T                                         | p.Arg367Trp                 | 0 | FALSE | chr16:211<br>0794:C:T  | 59:chr16:2<br>110794:C:<br>T  | 0.001509 |
| 11_bl-1 |  | MIR4673;<br>11 NOTCH1                   | MODIFIER; MODERATE | n.*59G>T;<br>c.1286G>T                            | ; p.Cys429Phe               | 0 | FALSE | chr9:1394<br>12359:C:A | 59:chr9:13<br>9412359:C<br>:A | 0.001905 |
| 11_bl-1 |  |                                         | MODERATE           | c.1598C>A                                         | p.Thr533Lys                 | 1 | FALSE | chr1:1627<br>41907:C:A | 59:chr1:16<br>2741907:C<br>:A | 0.001395 |
| 11_bl-1 |  |                                         | MODERATE           | c.1593G>T                                         | p.Trp531Cys                 | 1 | FALSE | chr7:1404<br>76813:C:A | 59:chr7:14<br>0476813:C<br>:A | 0.001098 |
| 11_bl-1 |  | MIR4674;<br>MIR4674H<br>G;<br>11 NOTCH1 | MODIFIER; MODERATE | n.*87G>T;<br>n.-1C>A;<br>c.62G>T                  | ; p.Gly21Val                | 0 | FALSE | chr9:1394<br>38554:C:A | 59:chr9:13<br>9438554:C<br>:A | 0.002387 |

|         |    |                 |                    |                                                                               |                                                            |     |       |                             |                                |          |
|---------|----|-----------------|--------------------|-------------------------------------------------------------------------------|------------------------------------------------------------|-----|-------|-----------------------------|--------------------------------|----------|
| 11_bl-1 | 11 | NTRK1           | MODERATE           | c.1411C>T;<br>c.1501C>T;<br>c.1519C>T                                         | p.Arg471Cys<br>;<br>p.Arg501Cys<br>;<br>p.Arg507Cys        | 1   | FALSE | chr1:1568<br>45889:C:T      | 59:chr1:15<br>6845889:C<br>:T  | 0.001576 |
| 11_bl-1 | 11 | FBXW7           | HIGH               | c.357G>A;<br>c.471G>A;<br>c.711G>A                                            | p.Trp119*;<br>p.Trp157*;<br>p.Trp237*                      | 0   | FALSE | chr4:1532<br>68097:C:T      | 59:chr4:15<br>3268097:C<br>:T  | 0.001468 |
| 11_bl-1 | 11 | PKD1;<br>TSC2   | MODIFIER; MODERATE | c.*13118G<br>>A;<br>c.*13121G<br>>A;<br>c.3935C>T;<br>c.4067C>T;<br>c.4136C>T | p.Ser1312Le<br>u;<br>p.Ser1356Le<br>u;<br>p.Ser1379Le<br>u | 0   | FALSE | chr16:213<br>4359:C:T       | 59:chr16:2<br>134359:C:<br>T   | 0.00127  |
| 11_bl-1 | 11 | KRAS            | MODERATE           | c.182A>G                                                                      | p.Gln61Arg                                                 | 92  | FALSE | chr12:253<br>80276:T:C      | 59:chr12:2<br>5380276:T<br>:C  | 0.002459 |
| 11_bl-1 | 11 | EVI2A; NF1      | MODIFIER; MODERATE | c.-266G>A;<br>c.-338G>A;<br>c.5020C>T;<br>c.5083C>T                           | p.Arg1674Tr<br>p;<br>p.Arg1695Tr<br>p                      | 1   | FALSE | chr17:296<br>53085:C:T      | 59:chr17:2<br>9653085:C<br>:T  | 0.001164 |
| 11_bl-1 | 11 | EGFR            | MODIFIER; MODERATE | c.*2133G><br>A;<br>c.*2364G><br>A;<br>c.2030G>A                               | p.Arg677His                                                | 5   | FALSE | chr7:5524<br>0786:G:A       | 59:chr7:55<br>240786:G:<br>A   | 0.001921 |
| 11_bl-1 | 11 | TSC2            | MODERATE           | c.1610G>A                                                                     | p.Arg537His                                                | 0   | FALSE | chr16:211<br>5530:G:A       | 59:chr16:2<br>115530:G:<br>A   | 0.001254 |
| 11_bl-1 | 11 | HRAS;<br>LRRC56 | MODERATE; MODIFIER | c.368G>A;<br>c.-506C>T                                                        | p.Arg123His<br>;                                           | 2   | FALSE | chr11:533<br>535:C:T        | 59:chr11:5<br>33535:C:T        | 0.00144  |
| 11_bl-1 | 11 | TSC2            | MODERATE           | c.1503C>A                                                                     | p.Asp501Glu                                                | 0   | FALSE | chr16:211<br>4332:C:A       | 59:chr16:2<br>114332:C:<br>A   | 0.001498 |
| 11_bl-1 | 11 | AKT1            | MODERATE           | c.49G>A                                                                       | p.Glu17Lys                                                 | 287 | FALSE | chr14:105<br>246551:C:<br>T | 59:chr14:1<br>05246551:<br>C:T | 0.0015   |
| 11_bl-1 | 11 | NTRK2           | MODERATE           | c.1960C>A<br>;<br>c.2008C>A                                                   | p.Leu654Met<br>;<br>p.Leu670Met                            | 0   | FALSE | chr9:8757<br>0268:C:A       | 59:chr9:87<br>570268:C:<br>A   | 0.001567 |

|         |    |                    |                            |                                                                                                 |                                                                                                                   |    |       |                        |                                |          |
|---------|----|--------------------|----------------------------|-------------------------------------------------------------------------------------------------|-------------------------------------------------------------------------------------------------------------------|----|-------|------------------------|--------------------------------|----------|
| 11_bl-1 | 11 | MITF               | MODERATE                   | c.1091G>A ;<br>c.1136G>A ;<br>c.1139G>A ;<br>c.650G>A ;<br>c.818G>A ;<br>c.836G>A ;<br>c.983G>A | p.Arg364Gln ;<br>p.Arg379Gln ;<br>p.Arg380Gln ;<br>p.Arg217Gln ;<br>p.Arg273Gln ;<br>p.Arg279Gln ;<br>p.Arg328Gln | 0  | FALSE | chr3:7000<br>8549:G:A  | 59:chr3:70<br>008549:G:<br>A   | 0.001339 |
| 11_bl-1 | 11 | MAP2K1             | MODERATE                   | c.379G>A                                                                                        | p.Val127Met                                                                                                       | 1  | FALSE | chr15:667<br>29171:G:A | 59:chr15:6<br>6729171:G:<br>:A | 0.001729 |
| 11_bl-1 | 11 | PDGFRA             | MODERATE                   | c.1526C>A                                                                                       | p.Ala509Asp                                                                                                       | 1  | FALSE | chr4:5513<br>9865:C:A  | 59:chr4:55<br>139865:C:<br>A   | 0.001222 |
| 11_bl-1 | 11 | CTNNB1             | MODERATE                   | c.96C>A                                                                                         | p.Asp32Glu                                                                                                        | 0  | FALSE | chr3:4126<br>6099:C:A  | 59:chr3:41<br>266099:C:<br>A   | 0.001812 |
| 11_bl-1 | 11 | C9orf53;<br>CDKN2A | MODIFIER; MODERATE;<br>LOW | n.*616T>G ;<br>c.*120A>C ;<br>c.197A>C ;<br>c.240A>C                                            | p.His66Pro ;<br>p.Pro80Pro                                                                                        | 1  | FALSE | chr9:2197<br>1161:T:G  | 59:chr9:21<br>971161:T:<br>G   | 0.018743 |
| 11_bl-1 | 11 | PIK3CA             | MODERATE                   | c.1255C>A                                                                                       | p.His419Asn                                                                                                       | 1  | FALSE | chr3:1789<br>27977:C:A | 59:chr3:17<br>8927977:C:<br>:A | 0.002035 |
| 11_bl-1 | 11 | KIT                | MODERATE                   | c.682G>A                                                                                        | p.Glu228Lys                                                                                                       | 1  | FALSE | chr4:5556<br>5858:G:A  | 59:chr4:55<br>565858:G:<br>A   | 0.001401 |
| 11_bl-1 | 11 | NTRK2              | MODERATE                   | c.770C>T                                                                                        | p.Ser257Phe                                                                                                       | 0  | FALSE | chr9:8733<br>9188:C:T  | 59:chr9:87<br>339188:C:<br>T   | 0.001245 |
| 11_bl-1 | 11 | CWH43              | MODERATE                   | c.569C>T ;<br>c.650C>T                                                                          | p.Ser190Phe ;<br>p.Ser217Phe                                                                                      | 0  | FALSE | chr4:4899<br>6774:C:T  | 59:chr4:48<br>996774:C:<br>T   | 0.001329 |
| 11_bl-1 | 11 | C9orf53;<br>CDKN2A | MODIFIER; MODERATE         | n.*616C>T ;<br>c.*245G>A ;<br>c.322G>A ;<br>c.365G>A                                            | p.Asp108Asn ;<br>p.Arg122Gln                                                                                      | 14 | FALSE | chr9:2197<br>1036:C:T  | 59:chr9:21<br>971036:C:<br>T   | 0.001333 |

|         |    |                   |                    |                                                                                                                           |                                                               |   |       |                     |                        |          |
|---------|----|-------------------|--------------------|---------------------------------------------------------------------------------------------------------------------------|---------------------------------------------------------------|---|-------|---------------------|------------------------|----------|
| 11_bl-1 | 11 | FGFR2             | MODIFIER; MODERATE | c.1087+1267C>T;<br>c.749-2096C>T;<br>c.820+1267C>T;<br>c.939+2564C>T;<br>c.643C>T;<br>c.721C>T;<br>c.988C>T;<br>n.1438C>T | p.Arg215Trp<br>;<br>p.Arg241Trp<br>;<br>p.Arg330Trp           | 2 | FALSE | chr10:123276929:G:A | 59:chr10:123276929:G:A | 0.00206  |
| 11_bl-1 | 11 | CDKN2A            | MODIFIER; MODERATE | c.194-3568A>C;<br>c.52A>C                                                                                                 | p.Thr18Pro                                                    | 1 | FALSE | chr9:21974775:T:G   | 59:chr9:21974775:T:G   | 0.004307 |
| 11_bl-1 | 11 | TP53              | MODERATE           | c.116A>G;<br>c.35A>G;<br>c.395A>G;<br>c.512A>G                                                                            | p.Glu39Gly;<br>p.Glu12Gly;<br>p.Glu132Gly<br>;<br>p.Glu171Gly | 3 | FALSE | chr17:7578418:T:C   | 59:chr17:7578418:T:C   | 0.001503 |
| 11_bl-1 | 11 | NOTCH1            | MODERATE           | c.4828G>A                                                                                                                 | p.Ala1610Thr                                                  | 0 | FALSE | chr9:139399315:C:T  | 59:chr9:139399315:C:T  | 0.001553 |
| 11_bl-1 | 11 | EGFR;<br>EGFR-AS1 | MODERATE; MODIFIER | c.2527G>A;<br>n.-1C>T                                                                                                     | p.Val843Ile;                                                  | 6 | FALSE | chr7:55259469:G:A   | 59:chr7:55259469:G:A   | 0.00144  |
| 11_bl-1 | 11 | ESR1              | MODERATE           | c.929C>T;<br>c.932C>T;<br>c.938C>T                                                                                        | p.Thr310Met;<br>p.Thr311Met;<br>p.Thr313Met                   | 0 | FALSE | chr6:152265479:C:T  | 59:chr6:152265479:C:T  | 0.001171 |
| 11_bl-1 | 11 | ATM               | MODERATE           | c.1237C>A                                                                                                                 | p.Leu413Ile                                                   | 0 | FALSE | chr11:108121429:C:A | 59:chr11:108121429:C:A | 0.002269 |
| 11_bl-1 | 11 | NF1               | MODERATE           | c.1657C>T                                                                                                                 | p.His553Tyr                                                   | 1 | FALSE | chr17:29548883:C:T  | 59:chr17:29548883:C:T  | 0.001476 |
| 11_bl-1 | 11 | MAP2K1            | MODERATE           | c.198C>A                                                                                                                  | p.Asp66Glu                                                    | 4 | FALSE | chr15:66727482:C:A  | 59:chr15:66727482:C:A  | 0.001364 |
| 11_c4-b | 11 | IDH1              | MODERATE           | c.299G>T                                                                                                                  | p.Arg100Leu                                                   | 5 | FALSE | chr2:209113208:C:A  | 60:chr2:209113208:C:A  | 0.001825 |
| 11_c4-b | 11 | SMO               | MODERATE           | c.1045A>C                                                                                                                 | p.Thr349Pro                                                   | 0 | FALSE | chr7:128846115:A:C  | 60:chr7:128846115:A:C  | 0.004613 |
| 11_c4-b | 11 | PTEN              | MODERATE           | c.392C>A                                                                                                                  | p.Thr131Asn                                                   | 2 | FALSE | chr10:89692908:C:A  | 60:chr10:89692908:C:A  | 0.002504 |
| 11_c4-b | 11 | FLT3              | MODERATE           | c.393G>C                                                                                                                  | p.Leu131Phe                                                   | 0 | FALSE | chr13:28631575:C:G  | 60:chr13:28631575:C:G  | 0.001642 |

|         |    |                    |                    |                                                      |                                                     |       |       |                             |                                |          |
|---------|----|--------------------|--------------------|------------------------------------------------------|-----------------------------------------------------|-------|-------|-----------------------------|--------------------------------|----------|
| 11_c4-b | 11 | KRAS               | MODERATE           | c.35G>T                                              | p.Gly12Val                                          | 11213 | FALSE | chr12:253<br>98284:C:A      | 60:chr12:2<br>5398284:C<br>:A  | 0.002852 |
| 11_c4-b | 11 | CDH1               | MODERATE           | c.2204C>T                                            | p.Ala735Val                                         | 0     | FALSE | chr16:688<br>62116:C:T      | 60:chr16:6<br>8862116:C<br>:T  | 0.001869 |
| 11_c4-b | 11 | PIK3R1             | HIGH               | c.1224C>A<br>;<br>c.135C>A;<br>c.324C>A;<br>c.414C>A | p.Tyr408*;<br>p.Tyr45*;<br>p.Tyr108*;<br>p.Tyr138*  | 1     | FALSE | chr5:6758<br>9236:C:A       | 60:chr5:67<br>589236:C:<br>A   | 0.001671 |
| 11_c4-b | 11 | HOXD-AS2;<br>HOXD8 | MODIFIER; MODERATE | n.*692G>T<br>;<br>c.105C>A;<br>c.654C>A;<br>c.657C>A | p.Asn35Lys;<br>p.Asn218Lys<br>;<br>p.Asn219Lys      | 0     | FALSE | chr2:1769<br>96124:C:A      | 60:chr2:17<br>6996124:C<br>:A  | 0.001586 |
| 11_c4-b | 11 | FGFR4              | MODIFIER; MODERATE | c.1098-<br>65G>A;<br>c.1251+10<br>G>A;<br>c.1067G>A  | p.Arg356His                                         | 1     | FALSE | chr5:1765<br>20342:G:A      | 60:chr5:17<br>6520342:G<br>:A  | 0.001631 |
| 11_c4-b | 11 | PDGFRA             | MODERATE           | c.364C>A                                             | p.Pro122Thr                                         | 1     | FALSE | chr4:5512<br>7576:C:A       | 60:chr4:55<br>127576:C:<br>A   | 0.002451 |
| 11_c4-b | 11 | FBXW7              | HIGH               | c.1069G>T<br>;<br>c.1309G>T<br>; c.955G>T            | p.Gly357*;<br>p.Gly437*;<br>p.Gly319*               | 0     | FALSE | chr4:1532<br>49469:C:A      | 60:chr4:15<br>3249469:C<br>:A  | 0.001698 |
| 11_c4-b | 11 | ALK                | MODERATE           | c.1359G>T                                            | p.Gln453His                                         | 1     | FALSE | chr2:2955<br>1271:C:A       | 60:chr2:29<br>551271:C:<br>A   | 0.001556 |
| 11_c4-b | 11 | KDR                | MODERATE           | c.583G>T                                             | p.Ala195Ser                                         | 1     | FALSE | chr4:5598<br>1116:C:A       | 60:chr4:55<br>981116:C:<br>A   | 0.003053 |
| 11_c4-b | 11 | NOTCH1             | MODERATE           | c.4391G>T                                            | p.Ser1464Ile                                        | 0     | FALSE | chr9:1393<br>99957:C:A      | 60:chr9:13<br>9399957:C<br>:A  | 0.001984 |
| 11_c4-b | 11 | ATM                | HIGH               | c.2558C>A                                            | p.Ser853*                                           | 0     | FALSE | chr11:108<br>137989:C:<br>A | 60:chr11:1<br>08137989:<br>C:A | 0.001447 |
| 11_c4-b | 11 | FBXW7              | MODERATE           | c.1204G>T<br>;<br>c.1318G>T<br>;<br>c.1558G>T        | p.Asp402Tyr<br>;<br>p.Asp440Tyr<br>;<br>p.Asp520Tyr | 0     | FALSE | chr4:1532<br>47244:C:A      | 60:chr4:15<br>3247244:C<br>:A  | 0.001658 |
| 11_c4-b | 11 | DDR2               | MODERATE           | c.313C>A                                             | p.Arg105Ser                                         | 2     | FALSE | chr1:1627<br>24541:C:A      | 60:chr1:16<br>2724541:C<br>:A  | 0.002575 |
| 11_c4-b | 11 | NTRK2              | MODERATE           | c.770C>T                                             | p.Ser257Phe                                         | 0     | FALSE | chr9:8733<br>9188:C:T       | 60:chr9:87<br>339188:C:<br>T   | 0.001502 |

|         |    |        |                    |                                                                             |                                                     |    |       |                             |                                |          |
|---------|----|--------|--------------------|-----------------------------------------------------------------------------|-----------------------------------------------------|----|-------|-----------------------------|--------------------------------|----------|
| 11_c4-b | 11 | TSC1   | HIGH               | c.496G>T;<br>c.649G>T                                                       | p.Glu166*;<br>p.Glu217*                             | 0  | FALSE | chr9:1357<br>97220:C:A      | 60:chr9:13<br>5797220:C<br>:A  | 0.003911 |
| 11_c4-b | 11 | CDH1   | MODERATE           | c.294C>A                                                                    | p.Phe98Leu                                          | 0  | FALSE | chr16:688<br>35703:C:A      | 60:chr16:6<br>8835703:C<br>:A  | 0.001992 |
| 11_c4-b | 11 | KDR    | MODERATE           | c.2323G>T                                                                   | p.Ala775Ser                                         | 1  | FALSE | chr4:5596<br>4914:C:A       | 60:chr4:55<br>964914:C<br>A    | 0.006071 |
| 11_c4-b | 11 | ALK    | MODERATE           | c.871C>T                                                                    | p.Arg291Cys                                         | 3  | FALSE | chr2:2991<br>7797:G:A       | 60:chr2:29<br>917797:G<br>A    | 0.001663 |
| 11_c4-b | 11 | FGFR3  | MODERATE           | c.905G>A                                                                    | p.Gly302Asp                                         | 1  | FALSE | chr4:1803<br>727:G:A        | 60:chr4:18<br>03727:G:A        | 0.003953 |
| 11_c4-b | 11 | CTNNB1 | MODERATE           | c.884C>A                                                                    | p.Ala295Asp                                         | 0  | FALSE | chr3:4126<br>7300:C:A       | 60:chr3:41<br>267300:C<br>A    | 0.004077 |
| 11_c4-b | 11 | FBXW7  | MODERATE           | c.1039C>T;<br>c.1153C>T;<br>c.1393C>T                                       | p.Arg347Cys<br>;<br>p.Arg385Cys<br>;<br>p.Arg465Cys | 0  | FALSE | chr4:1532<br>49385:G:A      | 60:chr4:15<br>3249385:G<br>:A  | 0.001784 |
| 11_c4-b | 11 | CDKN2A | MODIFIER; MODERATE | c.194-<br>3568A>C;<br>c.52A>C                                               | ; p.Thr18Pro                                        | 1  | FALSE | chr9:2197<br>4775:T:G       | 60:chr9:21<br>974775:T<br>G    | 0.003708 |
| 11_c4-b | 11 | FGFR2  | MODIFIER; MODERATE | c.110-<br>14054G>T;<br>c.110-<br>934G>T;<br>n.757-<br>14054G>T;<br>c.301G>T | ; p.Asp101Tyr                                       | 3  | FALSE | chr10:123<br>325027:C:<br>A | 60:chr10:1<br>23325027:<br>C:A | 0.001708 |
| 11_c4-b | 11 | HGF    | MODERATE           | c.5G>T                                                                      | p.Trp2Leu                                           | 0  | FALSE | chr7:8139<br>9283:C:A       | 60:chr7:81<br>399283:C<br>A    | 0.00202  |
| 11_c4-b | 11 | RET    | MODERATE           | c.1690A>C                                                                   | p.Thr564Pro                                         | 1  | FALSE | chr10:436<br>08342:A:C      | 60:chr10:4<br>3608342:A<br>:C  | 0.005505 |
| 11_c4-b | 11 | ATM    | MODERATE           | c.2930G>A                                                                   | p.Cys977Tyr                                         | 0  | FALSE | chr11:108<br>141986:G:<br>A | 60:chr11:1<br>08141986:<br>G:A | 0.001522 |
| 11_c4-b | 11 | PTEN   | HIGH               | c.640C>T                                                                    | p.Gln214*                                           | 12 | FALSE | chr10:897<br>17615:C:T      | 60:chr10:8<br>9717615:C<br>:T  | 0.001821 |
| 11_c4-b | 11 | NOTCH1 | MODERATE           | c.3635G>A                                                                   | p.Gly1212As<br>p                                    | 0  | FALSE | chr9:1394<br>01765:C:T      | 60:chr9:13<br>9401765:C<br>:T  | 0.0025   |
| 11_c4-b | 11 | DDR2   | MODERATE           | c.185G>A                                                                    | p.Arg62Lys                                          | 1  | FALSE | chr1:1627<br>22987:G:A      | 60:chr1:16<br>2722987:G<br>:A  | 0.001883 |
| 11_c4-b | 11 | IGF1R  | MODERATE           | c.3905T>C;<br>c.3908T>C                                                     | p.Val1302Al<br>a;<br>p.Val1303Al<br>a               | 0  | FALSE | chr15:995<br>00475:T:C      | 60:chr15:9<br>9500475:T<br>:C  | 0.003071 |
| 11_c4-b | 11 | TSC2   | MODERATE           | c.1654G>A                                                                   | p.Ala552Thr                                         | 0  | FALSE | chr16:211<br>5574:G:A       | 60:chr16:2<br>115574:G<br>A    | 0.002291 |

|          |    |                    |                    |                                                           |                                                               |     |       |                        |                               |          |
|----------|----|--------------------|--------------------|-----------------------------------------------------------|---------------------------------------------------------------|-----|-------|------------------------|-------------------------------|----------|
| 11_c4-b  | 11 | TP53               | MODERATE           | c.128G>A;<br>c.407G>A;<br>c.47G>A;<br>c.524G>A            | p.Arg43His;<br>p.Arg136His<br>;<br>p.Arg16His;<br>p.Arg175His | 979 | FALSE | chr17:757<br>8406:C:T  | 60:chr17:7<br>578406:C:<br>T  | 0.002336 |
| 11_c4-b  | 11 | CDKN2A             | MODIFIER; MODERATE | c.194-<br>3521G>T;<br>c.99G>T                             | ; p.Glu33Asp                                                  | 1   | FALSE | chr9:2197<br>4728:C:A  | 60:chr9:21<br>974728:C:<br>A  | 0.002457 |
| 11_c4-b  | 11 | CTNNB1             | MODERATE           | c.595G>A                                                  | p.Val199Ile                                                   | 0   | FALSE | chr3:4126<br>6924:G:A  | 60:chr3:41<br>266924:G:<br>A  | 0.001714 |
| 11_c4-b  | 11 | AKT3               | MODERATE           | c.1100G>A                                                 | p.Arg367Gln                                                   | 0   | FALSE | chr1:2437<br>16094:C:T | 60:chr1:24<br>3716094:C<br>:T | 0.001847 |
| 11_c4-b  | 11 | NTRK3              | MODERATE           | c.1351C>T;<br>c.1375C>T                                   | p.Arg451Trp<br>;<br>p.Arg459Trp                               | 0   | FALSE | chr15:886<br>69523:G:A | 60:chr15:8<br>8669523:G<br>:A | 0.001818 |
| 11_c4-b  | 11 | NOTCH1             | MODERATE           | c.4918G>A                                                 | p.Ala1640Th<br>r                                              | 0   | FALSE | chr9:1393<br>99225:C:T | 60:chr9:13<br>9399225:C<br>:T | 0.002442 |
| 11_c4-b  | 11 | EGFR               | MODERATE           | c.445C>T                                                  | p.Arg149Trp                                                   | 1   | FALSE | chr7:5521<br>4319:C:T  | 60:chr7:55<br>214319:C:<br>T  | 0.002112 |
| 25_pro-b | 25 | ALK                | MODERATE           | c.4280C>T                                                 | p.Ser1427Ph<br>e                                              | 2   | FALSE | chr2:2941<br>6673:G:A  | 63:chr2:29<br>416673:G:<br>A  | 0.001437 |
| 25_pro-b | 25 | IDH1               | MODERATE           | c.299G>T                                                  | p.Arg100Leu                                                   | 5   | FALSE | chr2:2091<br>13208:C:A | 63:chr2:20<br>9113208:C<br>:A | 0.001676 |
| 25_pro-b | 25 | NTRK2              | MODERATE           | c.1822G>A<br>;<br>c.1870G>A                               | p.Val608Me<br>t;<br>p.Val624Me<br>t                           | 0   | FALSE | chr9:8756<br>3482:G:A  | 63:chr9:87<br>563482:G:<br>A  | 0.001625 |
| 25_pro-b | 25 | KRAS               | HIGH               | c.292G>T                                                  | p.Glu98*                                                      | 1   | FALSE | chr12:253<br>78706:C:A | 63:chr12:2<br>5378706:C<br>:A | 0.001932 |
| 25_pro-b | 25 | CACNB1;<br>RPL19   | MODIFIER; MODERATE | c.-209C>T;<br>c.82G>A                                     | ; p.Glu28Lys                                                  | 0   | FALSE | chr17:373<br>57542:G:A | 63:chr17:3<br>7357542:G<br>:A | 0.001873 |
| 25_pro-b | 25 | IGF1R              | MODERATE           | c.3905T>C;<br>c.3908T>C                                   | p.Val1302Al<br>a;<br>p.Val1303Al<br>a                         | 0   | FALSE | chr15:995<br>00475:T:C | 63:chr15:9<br>9500475:T<br>:C | 0.001817 |
| 25_pro-b | 25 | MET                | MODERATE           | c.2335G>A<br>;<br>c.2389G>A                               | p.Val779Me<br>t;<br>p.Val797Me<br>t                           | 1   | FALSE | chr7:1163<br>99515:G:A | 63:chr7:11<br>6399515:G<br>:A | 0.001516 |
| 25_pro-b | 25 | C9orf53;<br>CDKN2A | MODIFIER; MODERATE | n.*616C>G<br>;<br>c.*140G>C<br>;<br>c.217G>C;<br>c.260G>C | ; p.Ala73Pro;<br>p.Arg87Pro                                   | 1   | FALSE | chr9:2197<br>1141:C:G  | 63:chr9:21<br>971141:C:<br>G  | 0.011382 |
| 25_pro-b | 25 | PIK3CA             | MODERATE           | c.3068G>A                                                 | p.Arg1023Gl<br>n                                              | 4   | FALSE | chr3:1789<br>52013:G:A | 63:chr3:17<br>8952013:G<br>:A | 0.001538 |



|          |    |                    |                    |                                                           |                                                               |      |       |                             |                                |          |
|----------|----|--------------------|--------------------|-----------------------------------------------------------|---------------------------------------------------------------|------|-------|-----------------------------|--------------------------------|----------|
| 25_pro-b | 25 | KIT                | MODERATE           | c.1726C>T;<br>c.1738C>T                                   | p.His576Tyr;<br>p.His580Tyr                                   | 2    | FALSE | chr4:5559<br>3672:C:T       | 63:chr4:55<br>593672:C:<br>T   | 0.001589 |
| 25_pro-b | 25 | MET                | MODERATE           | c.487T>C                                                  | p.Ser163Pro                                                   | 1    | FALSE | chr7:1163<br>39625:T:C      | 63:chr7:11<br>6339625:T<br>:C  | 0.003867 |
| 38_pro-b | 38 | MET                | HIGH               | c.1639C>T                                                 | p.Arg547*                                                     | 2    | FALSE | chr7:1163<br>81017:C:T      | 65:chr7:11<br>6381017:C<br>:T  | 0.001029 |
| 38_pro-b | 38 | TP53               | HIGH; MODIFIER     | c.151G>T;<br>c.34G>T; c.<br>279G>T; c.<br>360G>T          | p.Glu51*;<br>p.Glu12*;                                        | 10   | FALSE | chr17:757<br>9536:C:A       | 65:chr17:7<br>579536:C:<br>A   | 0.001686 |
| 38_pro-b | 38 | SMO                | MODERATE           | c.1045A>C                                                 | p.Thr349Pro                                                   | 0    | FALSE | chr7:1288<br>46115:A:C      | 65:chr7:12<br>8846115:A<br>:C  | 0.001195 |
| 38_pro-b | 38 | C9orf53;<br>CDKN2A | MODIFIER; MODERATE | n.*616C>G<br>;<br>c.*140G>C<br>;<br>c.217G>C;<br>c.260G>C | p.Ala73Pro;<br>p.Arg87Pro                                     | 1    | FALSE | chr9:2197<br>1141:C:G       | 65:chr9:21<br>971141:C:<br>G   | 0.01487  |
| 38_pro-b | 38 | PTEN               | MODERATE           | c.421C>A                                                  | p.His141Asn                                                   | 2    | FALSE | chr10:896<br>92937:C:A      | 65:chr10:8<br>9692937:C<br>:A  | 0.001506 |
| 38_pro-b | 38 | NTRK1              | MODERATE           | c.2028C>A<br>;<br>c.2118C>A<br>;<br>c.2136C>A             | p.Ser676Arg<br>;<br>p.Ser706Arg<br>;<br>p.Ser712Arg           | 1    | FALSE | chr1:1568<br>49880:C:A      | 65:chr1:15<br>6849880:C<br>:A  | 0.001349 |
| 38_pro-b | 38 | NTRK1              | MODERATE           | c.184G>A;<br>c.274G>A                                     | p.Glu62Lys;<br>p.Glu92Lys                                     | 1    | FALSE | chr1:1568<br>34207:G:A      | 65:chr1:15<br>6834207:G<br>:A  | 0.001524 |
| 38_pro-b | 38 | ATM                | MODERATE           | c.7328G>A                                                 | p.Arg2443Gln                                                  | 0    | FALSE | chr11:108<br>200961:G:<br>A | 65:chr11:1<br>08200961:<br>G:A | 0.001158 |
| 38_pro-b | 38 | NF1                | HIGH               | c.5294C>A<br>;<br>c.5357C>A                               | p.Ser1765*;<br>p.Ser1786*                                     | 1    | FALSE | chr17:296<br>54605:C:A      | 65:chr17:2<br>9654605:C<br>:A  | 0.000995 |
| 38_pro-b | 38 | TP53               | MODERATE           | c.128G>A;<br>c.407G>A;<br>c.47G>A;<br>c.524G>A            | p.Arg43His;<br>p.Arg136His<br>;<br>p.Arg16His;<br>p.Arg175His | 979  | FALSE | chr17:757<br>8406:C:T       | 65:chr17:7<br>578406:C:<br>T   | 0.001542 |
| 38_pro-b | 38 | NOTCH1             | MODERATE           | c.2528A>G                                                 | p.Glu843Gly                                                   | 0    | FALSE | chr9:1394<br>05663:T:C      | 65:chr9:13<br>9405663:T<br>:C  | 0.229068 |
| 38_pro-b | 38 | PIK3CA             | MODERATE           | c.1633G>A                                                 | p.Glu545Lys                                                   | 1189 | FALSE | chr3:1789<br>36091:G:A      | 65:chr3:17<br>8936091:G<br>:A  | 0.203255 |

|          |    |                    |                    |                                                                                               |                                                                                                                 |    |       |                        |                               |          |
|----------|----|--------------------|--------------------|-----------------------------------------------------------------------------------------------|-----------------------------------------------------------------------------------------------------------------|----|-------|------------------------|-------------------------------|----------|
| 38_pro-b | 38 | HOXD-AS2;<br>HOXD8 | MODIFIER; MODERATE | n.*692G>T ;<br>; c.105C>A;<br>c.654C>A;<br>c.657C>A                                           | p.Asn35Lys;<br>p.Asn218Lys<br>; ;<br>p.Asn219Lys                                                                | 0  | FALSE | chr2:1769<br>96124:C:A | 65:chr2:17<br>6996124:C<br>:A | 0.001396 |
| 38_pro-b | 38 | HRAS;<br>LRRC56    | MODERATE; MODIFIER | c.175G>A;<br>c.-506C>T                                                                        | p.Ala59Thr;                                                                                                     | 2  | FALSE | chr11:533<br>881:C:T   | 65:chr11:5<br>33881:C:T       | 0.001458 |
| 38_pro-b | 38 | EPHA3              | HIGH               | c.406C>T                                                                                      | p.Arg136*                                                                                                       | 0  | FALSE | chr3:8925<br>9262:C:T  | 65:chr3:89<br>259262:C:<br>T  | 0.001091 |
| 38_pro-b | 38 | ALK                | MODERATE           | c.2629G>T                                                                                     | p.Ala877Ser                                                                                                     | 1  | FALSE | chr2:2945<br>5173:C:A  | 65:chr2:29<br>455173:C:<br>A  | 0.001507 |
| 38_pro-b | 38 | IGF1R              | MODERATE           | c.3934T>C;<br>c.3937T>C                                                                       | p.Ser1312Pr<br>o;<br>p.Ser1313Pr<br>o                                                                           | 0  | FALSE | chr15:995<br>00504:T:C | 65:chr15:9<br>9500504:T<br>:C | 0.001303 |
| 38_pro-b | 38 | DDR2               | MODERATE           | c.313C>A                                                                                      | p.Arg105Ser                                                                                                     | 2  | FALSE | chr1:1627<br>24541:C:A | 65:chr1:16<br>2724541:C<br>:A | 0.000749 |
| 38_pro-b | 38 | TP53               | MODIFIER; MODERATE | c.*137A>G<br>;<br>c.*225A>G<br>;<br>c.1001A>G<br>;<br>c.1118A>G<br>;<br>c.641A>G;<br>c.722A>G | p.Lys334Arg<br>;<br>p.Lys373Arg<br>;<br>p.Lys214Arg<br>;<br>p.Lys241Arg                                         | 1  | FALSE | chr17:757<br>2991:T:C  | 65:chr17:7<br>572991:T:<br>C  | 0.00496  |
| 38_pro-b | 38 | TP53               | MODERATE           | c.337G>A;<br>c.418G>A;<br>c.697G>A;<br>c.814G>A                                               | p.Val113Me<br>t;<br>p.Val140Me<br>t;<br>p.Val233Me<br>t;<br>p.Val272Me<br>t                                     | 85 | FALSE | chr17:757<br>7124:C:T  | 65:chr17:7<br>577124:C:<br>T  | 0.00816  |
| 38_pro-b | 38 | MIR4673;<br>NOTCH1 | MODIFIER; MODERATE | n.*59G>A;<br>c.1024G>A                                                                        | p.Ala342Thr                                                                                                     | 0  | FALSE | chr9:1394<br>13118:C:T | 65:chr9:13<br>9413118:C<br>:T | 0.001669 |
| 38_pro-b | 38 | FGFR1              | MODERATE           | c.487C>T;<br>c.493C>T;<br>c.736C>T;<br>c.754C>T;<br>c.760C>T;<br>c.853C>T                     | p.Arg163Trp<br>;<br>p.Arg165Trp<br>;<br>p.Arg246Trp<br>;<br>p.Arg252Trp<br>;<br>p.Arg254Trp<br>;<br>p.Arg285Trp | 1  | FALSE | chr8:3828<br>2203:G:A  | 65:chr8:38<br>282203:G:<br>A  | 0.001896 |

|          |    |        |                    |                                                                                     |                                                                         |       |       |                        |                               |          |
|----------|----|--------|--------------------|-------------------------------------------------------------------------------------|-------------------------------------------------------------------------|-------|-------|------------------------|-------------------------------|----------|
| 38_pro-b | 38 | TP53   | HIGH               | c.109C>T;<br>c.190C>T;<br>c.469C>T;<br>c.586C>T                                     | p.Arg37*;<br>p.Arg64*;<br>p.Arg157*;<br>p.Arg196*                       | 191   | FALSE | chr17:757<br>8263:G:A  | 65:chr17:7<br>578263:G:<br>A  | 0.251568 |
| 38_pro-b | 38 | PIK3CA | MODERATE           | c.308A>G                                                                            | p.Glu103Gly                                                             | 2     | FALSE | chr3:1789<br>16921:A:G | 65:chr3:17<br>8916921:A<br>:G | 0.000844 |
| 38_pro-b | 38 | KDR    | HIGH               | c.2830C>T                                                                           | p.Arg944*                                                               | 1     | FALSE | chr4:5596<br>1110:G:A  | 65:chr4:55<br>961110:G:<br>A  | 0.001408 |
| 38_pro-b | 38 | TP53   | MODERATE           | c.116A>G;<br>c.35A>G;<br>c.395A>G;<br>c.512A>G                                      | p.Glu39Gly;<br>p.Glu12Gly;<br>p.Glu132Gly<br>;<br>p.Glu171Gly           | 3     | FALSE | chr17:757<br>8418:T:C  | 65:chr17:7<br>578418:T:<br>C  | 0.001517 |
| 38_pro-b | 38 | TP53   | MODIFIER; MODERATE | c.*135A>G<br>;<br>c.*47A>G;<br>c.1028A>G<br>;<br>c.551A>G;<br>c.632A>G;<br>c.911A>G | p.Glu343Gly<br>;<br>p.Glu184Gly<br>;<br>p.Glu211Gly<br>;<br>p.Glu304Gly | 1     | FALSE | chr17:757<br>3999:T:C  | 65:chr17:7<br>573999:T:<br>C  | 0.001239 |
| 38_pro-b | 38 | NTRK1  | MODERATE           | c.1669C>T;<br>c.1759C>T;<br>c.1777C>T                                               | p.Arg557Trp<br>;<br>p.Arg587Trp<br>;<br>p.Arg593Trp                     | 1     | FALSE | chr1:1568<br>46336:C:T | 65:chr1:15<br>6846336:C<br>:T | 0.001122 |
| 38_pro-b | 38 | CDH1   | MODERATE           | c.2074G>A                                                                           | p.Ala692Thr                                                             | 0     | FALSE | chr16:688<br>57439:G:A | 65:chr16:6<br>8857439:G<br>:A | 0.00118  |
| 61_c3-b  | 61 | BRAF   | MODERATE           | c.1799T>A                                                                           | p.Val600Glu                                                             | 23024 | FALSE | chr7:1404<br>53136:A:T | 68:chr7:14<br>0453136:A<br>:T | 0.261006 |
| 61_c3-b  | 61 | TP53   | HIGH; MODIFIER     | c.181C>T;<br>c.298C>T;<br>c.-279C>T;<br>c.-360C>T                                   | p.Gln61*;<br>p.Gln100*                                                  | 16    | FALSE | chr17:757<br>9389:G:A  | 68:chr17:7<br>579389:G:<br>A  | 0.025597 |
| 61_c3-b  | 61 | PTEN   | MODERATE           | c.284C>T                                                                            | p.Pro95Leu                                                              | 5     | FALSE | chr10:896<br>92800:C:T | 68:chr10:8<br>9692800:C<br>:T | 0.003252 |
| 61_c3-b  | 61 | FLT3   | MODERATE           | c.2464G>A                                                                           | p.Gly822Arg                                                             | 0     | FALSE | chr13:285<br>92681:C:T | 68:chr13:2<br>8592681:C<br>:T | 0.002587 |

|         |    |        |                    |                                                 |                                                                         |    |       |                        |                               |          |
|---------|----|--------|--------------------|-------------------------------------------------|-------------------------------------------------------------------------|----|-------|------------------------|-------------------------------|----------|
| 61_c3-b | 61 | TP53   | MODERATE           | c.130T>C;<br>c.409T>C;<br>c.49T>C;<br>c.526T>C  | p.Cys44Arg;<br>p.Cys137Arg<br>;<br>p.Cys17Arg;<br>p.Cys176Arg           | 15 | FALSE | chr17:757<br>8404:A:G  | 68:chr17:7<br>578404:A:<br>G  | 0.003077 |
| 61_c3-b | 61 | ERBB2  | MODERATE; MODIFIER | c.560G>A;<br>c.605G>A;<br>c.650G>A;<br>n.974G>A | p.Arg187His<br>;<br>p.Arg202His<br>;<br>p.Arg217His<br>;                | 1  | FALSE | chr17:378<br>66345:G:A | 68:chr17:3<br>7866345:G<br>:A | 0.002717 |
| 61_c3-b | 61 | RET    | MODERATE           | c.1690A>C                                       | p.Thr564Pro                                                             | 1  | FALSE | chr10:436<br>08342:A:C | 68:chr10:4<br>3608342:A<br>:C | 0.004969 |
| 61_c3-b | 61 | HGF    | MODERATE           | c.973G>A;<br>c.988G>A                           | p.Asp325As<br>n;<br>p.Asp330As<br>n                                     | 0  | FALSE | chr7:8135<br>8973:C:T  | 68:chr7:81<br>358973:C:<br>T  | 0.002584 |
| 61_c3-b | 61 | CDKN2A | MODIFIER; MODERATE | c.194-<br>3568A>C;<br>c.52A>C                   | ; p.Thr18Pro                                                            | 1  | FALSE | chr9:2197<br>4775:T:G  | 68:chr9:21<br>974775:T:<br>G  | 0.013333 |
| 61_c3-b | 61 | SMO    | MODERATE           | c.1045A>C                                       | p.Thr349Pro                                                             | 0  | FALSE | chr7:1288<br>46115:A:C | 68:chr7:12<br>8846115:A<br>:C | 0.012032 |
| 61_c3-b | 61 | NF1    | MODERATE           | c.2695T>G                                       | p.Leu899Val                                                             | 3  | FALSE | chr17:295<br>56328:T:G | 68:chr17:2<br>9556328:T<br>:G | 0.002869 |
| 61_c3-b | 61 | FBXW7  | HIGH               | c.1027G>T<br>;<br>c.1267G>T<br>;<br>c.913G>T    | p.Gly343*;<br>p.Gly423*;<br>p.Gly305*                                   | 0  | FALSE | chr4:1532<br>49511:C:A | 68:chr4:15<br>3249511:C<br>:A | 0.002894 |
| 61_c3-b | 61 | PTEN   | MODERATE           | c.283C>T                                        | p.Pro95Ser                                                              | 3  | FALSE | chr10:896<br>92799:C:T | 68:chr10:8<br>9692799:C<br>:T | 0.01626  |
| 62_c3-b | 62 | KDR    | MODERATE           | c.2915C>T                                       | p.Ser972Leu                                                             | 1  | FALSE | chr4:5596<br>1025:G:A  | 69:chr4:55<br>961025:G:<br>A  | 0.000461 |
| 62_c3-b | 62 | TP53   | MODERATE           | c.383A>G;<br>c.464A>G;<br>c.743A>G;<br>c.860A>G | p.Glu128Gly<br>;<br>p.Glu155Gly<br>;<br>p.Glu248Gly<br>;<br>p.Glu287Gly | 2  | FALSE | chr17:757<br>7078:T:C  | 69:chr17:7<br>577078:T:<br>C  | 0.000551 |
| 62_c3-b | 62 | ESR1   | MODERATE           | c.1003C>A<br>;<br>c.1006C>A<br>;<br>c.1012C>A   | p.Pro335Thr<br>;<br>p.Pro336Thr<br>;<br>p.Pro338Thr                     | 0  | FALSE | chr6:1522<br>65553:C:A | 69:chr6:15<br>2265553:C<br>:A | 0.000792 |

|         |    |        |                    |                                                   |                                                                         |     |       |                             |                                |          |
|---------|----|--------|--------------------|---------------------------------------------------|-------------------------------------------------------------------------|-----|-------|-----------------------------|--------------------------------|----------|
| 62_c3-b | 62 | TP53   | MODERATE; MODIFIER | c.236C>T;<br>c.353C>T;<br>c.-279C>T;<br>c.-360C>T | p.Thr79Ile;<br>p.Thr118Ile;                                             | 4   | FALSE | chr17:757<br>9334:G:A       | 69:chr17:7<br>579334:G:<br>A   | 0.000871 |
| 62_c3-b | 62 | EPHA3  | MODERATE           | c.2641C>A                                         | p.Leu881Ile                                                             | 0   | FALSE | chr3:8949<br>9471:C:A       | 69:chr3:89<br>499471:C:<br>A   | 0.000301 |
| 62_c3-b | 62 | BRAF   | MODERATE           | c.1363G>A                                         | p.Gly455Arg                                                             | 1   | FALSE | chr7:1404<br>81445:C:T      | 69:chr7:14<br>0481445:C<br>:T  | 0.000421 |
| 62_c3-b | 62 | ALK    | MODERATE           | c.619G>A                                          | p.Ala207Thr                                                             | 1   | FALSE | chr2:3014<br>2907:C:T       | 69:chr2:30<br>142907:C:<br>T   | 0.00081  |
| 62_c3-b | 62 | NOTCH1 | MODERATE           | c.4733T>G                                         | p.Val1578Gly                                                            | 0   | FALSE | chr9:1393<br>99410:A:C      | 69:chr9:13<br>9399410:A<br>:C  | 0.001691 |
| 62_c3-b | 62 | ATM    | MODERATE           | c.6503C>T                                         | p.Ser2168Leu                                                            | 0   | FALSE | chr11:108<br>192078:C:<br>T | 69:chr11:1<br>08192078:<br>C:T | 0.000545 |
| 62_c3-b | 62 | TP53   | MODERATE           | c.367C>T;<br>c.448C>T;<br>c.727C>T;<br>c.844C>T   | p.Arg123Trp<br>;<br>p.Arg150Trp<br>;<br>p.Arg243Trp<br>;<br>p.Arg282Trp | 479 | FALSE | chr17:757<br>7094:G:A       | 69:chr17:7<br>577094:G:<br>A   | 0.000843 |
| 62_c3-b | 62 | ALK    | MODERATE           | c.4435G>A                                         | p.Ala1479Thr                                                            | 1   | FALSE | chr2:2941<br>6518:C:T       | 69:chr2:29<br>416518:C:<br>T   | 0.000413 |
| 62_c3-b | 62 | ATM    | HIGH               | c.8545C>T                                         | p.Arg2849*                                                              | 0   | FALSE | chr11:108<br>216596:C:<br>T | 69:chr11:1<br>08216596:<br>C:T | 0.00044  |
| 62_c3-b | 62 | IGF1R  | MODERATE           | c.3934T>C;<br>c.3937T>C                           | p.Ser1312Pro;<br>p.Ser1313Pro                                           | 0   | FALSE | chr15:995<br>00504:T:C      | 69:chr15:9<br>9500504:T<br>:C  | 0.013181 |
| 62_c3-b | 62 | FGFR3  | MODERATE           | c.1183G>A<br>;<br>c.1519G>A<br>;<br>c.1525G>A     | p.Val395Met;<br>p.Val507Met;<br>p.Val509Met                             | 1   | FALSE | chr4:1807<br>188:G:A        | 69:chr4:18<br>07188:G:A        | 0.001457 |
| 62_c3-b | 62 | TSC1   | MODERATE           | c.1964G>A<br>;<br>c.2114G>A<br>;<br>c.2117G>A     | p.Arg655His<br>;<br>p.Arg705His<br>;<br>p.Arg706His                     | 0   | FALSE | chr9:1357<br>79129:C:T      | 69:chr9:13<br>5779129:C<br>:T  | 0.000481 |

|         |    |        |                    |                                                                                                                                         |                                                          |    |       |                        |                               |          |
|---------|----|--------|--------------------|-----------------------------------------------------------------------------------------------------------------------------------------|----------------------------------------------------------|----|-------|------------------------|-------------------------------|----------|
| 62_c3-b | 62 | TP53   | MODIFIER; MODERATE | c.*117G>A ;<br>; p.Arg337His<br>c.*29G>A ;<br>c.1010G>A p.Arg178His<br>;<br>c.533G>A; p.Arg205His<br>c.614G>A ;<br>c.893G>A p.Arg298His |                                                          | 21 | FALSE | chr17:757<br>4017:C:T  | 69:chr17:7<br>574017:C:<br>T  | 0.000445 |
| 62_c3-b | 62 | STK11  | MODERATE           | c.1100C>T                                                                                                                               | p.Thr367Met                                              | 1  | FALSE | chr19:122<br>3163:C:T  | 69:chr19:1<br>223163:C:<br>T  | 0.001206 |
| 62_c3-b | 62 | SMO    | MODERATE           | c.869G>A                                                                                                                                | p.Arg290His                                              | 0  | FALSE | chr7:1288<br>45572:G:A | 69:chr7:12<br>8845572:G<br>:A | 0.000551 |
| 62_c3-b | 62 | ERBB2  | MODERATE; MODIFIER | c.1042C>T;<br>c.1087C>T;<br>c.1132C>T;<br>n.1456C>T                                                                                     | p.Pro348Ser<br>;<br>p.Pro363Ser<br>;<br>p.Pro378Ser<br>; | 1  | FALSE | chr17:378<br>68685:C:T | 69:chr17:3<br>7868685:C<br>:T | 0.000466 |
| 62_c3-b | 62 | TP53   | MODIFIER; MODERATE | c.-3G>T;<br>c.358G>T;<br>c.475G>T;<br>c.79G>T                                                                                           | p.Ala120Ser;<br>p.Ala159Ser;<br>p.Ala27Ser               | 23 | FALSE | chr17:757<br>8455:C:A  | 69:chr17:7<br>578455:C:<br>A  | 0.00077  |
| 62_c3-b | 62 | AKT3   | HIGH               | c.109G>T                                                                                                                                | p.Gly37*                                                 | 0  | FALSE | chr1:2438<br>58956:C:A | 69:chr1:24<br>3858956:C<br>:A | 0.00078  |
| 62_c3-b | 62 | MET    | MODERATE           | c.1024C>A                                                                                                                               | p.Leu342Ile                                              | 1  | FALSE | chr7:1163<br>40162:C:A | 69:chr7:11<br>6340162:C<br>:A | 0.000451 |
| 62_c3-b | 62 | HGF    | HIGH               | c.1993G>T<br>;<br>c.2008G>T                                                                                                             | p.Glu665*;<br>p.Glu670*                                  | 0  | FALSE | chr7:8133<br>4708:C:A  | 69:chr7:81<br>334708:C:<br>A  | 0.00056  |
| 62_c3-b | 62 | KIT    | MODERATE           | c.1673A>G<br>;<br>c.1685A>G                                                                                                             | p.Glu558Gly<br>;<br>p.Glu562Gly                          | 2  | FALSE | chr4:5559<br>3619:A:G  | 69:chr4:55<br>593619:A:<br>G  | 0.000549 |
| 62_c3-b | 62 | KIT    | MODERATE           | c.1485C>A                                                                                                                               | p.Asn495Lys                                              | 1  | FALSE | chr4:5559<br>2161:C:A  | 69:chr4:55<br>592161:C:<br>A  | 0.00091  |
| 62_c3-b | 62 | CTNNB1 | MODERATE           | c.2217G>A                                                                                                                               | p.Met739Ile                                              | 0  | FALSE | chr3:4128<br>0704:G:A  | 69:chr3:41<br>280704:G:<br>A  | 0.000536 |
| 62_c3-b | 62 | CDH1   | MODERATE           | c.1223C>A                                                                                                                               | p.Ala408Glu                                              | 0  | FALSE | chr16:688<br>47301:C:A | 69:chr16:6<br>8847301:C<br>:A | 0.000756 |
| 62_c3-b | 62 | PHLPP1 | HIGH               | c.2179C>T                                                                                                                               | p.Arg727*                                                | 0  | FALSE | chr18:605<br>62356:C:T | 69:chr18:6<br>0562356:C<br>:T | 0.000568 |
| 62_c3-b | 62 | NF1    | HIGH               | c.1307C>A                                                                                                                               | p.Ser436*                                                | 1  | FALSE | chr17:295<br>33304:C:A | 69:chr17:2<br>9533304:C<br>:A | 0.000513 |

|         |    |                            |                    |                                                                                                                     |                                                     |   |       |                        |                               |          |
|---------|----|----------------------------|--------------------|---------------------------------------------------------------------------------------------------------------------|-----------------------------------------------------|---|-------|------------------------|-------------------------------|----------|
| 62_c3-b | 62 | NOTCH1                     | HIGH               | c.3880G>T                                                                                                           | p.Glu1294*                                          | 0 | FALSE | chr9:1394<br>01189:C:A | 69:chr9:13<br>9401189:C<br>:A | 0.000543 |
| 62_c3-b | 62 | NTRK2                      | MODERATE           | c.412C>A                                                                                                            | p.Leu138Ile                                         | 0 | FALSE | chr9:8732<br>2811:C:A  | 69:chr9:87<br>322811:C:<br>A  | 0.000633 |
| 62_c3-b | 62 | DDR2                       | MODERATE           | c.1598C>A                                                                                                           | p.Thr533Lys                                         | 1 | FALSE | chr1:1627<br>41907:C:A | 69:chr1:16<br>2741907:C<br>:A | 0.000716 |
| 62_c3-b | 62 | PTEN                       | HIGH               | c.633C>A                                                                                                            | p.Cys211*                                           | 2 | FALSE | chr10:897<br>12015:C:A | 69:chr10:8<br>9712015:C<br>:A | 0.000595 |
| 62_c3-b | 62 | PIK3R1                     | HIGH               | c.1494C>A<br>;<br>c.405C>A;<br>c.594C>A;<br>c.684C>A                                                                | p.Cys498*;<br>p.Cys135*;<br>p.Cys198*;<br>p.Cys228* | 1 | FALSE | chr5:6759<br>0432:C:A  | 69:chr5:67<br>590432:C:<br>A  | 0.000436 |
| 62_c3-b | 62 | RET                        | MODERATE           | c.1907C>T                                                                                                           | p.Thr636Met                                         | 1 | FALSE | chr10:436<br>09955:C:T | 69:chr10:4<br>3609955:C<br>:T | 0.000806 |
| 62_c3-b | 62 | BRAF                       | MODERATE           | c.2012G>A                                                                                                           | p.Arg671Gln                                         | 1 | FALSE | chr7:1404<br>39727:C:T | 69:chr7:14<br>0439727:C<br>:T | 0.000608 |
| 62_c3-b | 62 | KDR                        | MODERATE           | c.2309G>T                                                                                                           | p.Gly770Val                                         | 1 | FALSE | chr4:5596<br>4928:C:A  | 69:chr4:55<br>964928:C:<br>A  | 0.001223 |
| 62_c3-b | 62 | GAPDH;<br>IFFO1;<br>NCAPD2 | MODERATE; MODIFIER | c.187G>A;<br>c.61G>A;<br>c.*1743C><br>T;<br>c.*1746C><br>T;<br>c.*1770C><br>T;<br>n.*2798C><br>T;<br>c.*4252G><br>A | p.Glu63Lys;<br>p.Glu21Lys;                          | 0 | FALSE | chr12:664<br>5907:G:A  | 69:chr12:6<br>645907:G:<br>A  | 0.00068  |
| 62_c3-b | 62 | FGFR3                      | MODERATE           | c.1162G>A<br>;<br>c.1498G>A<br>;<br>c.1504G>A                                                                       | p.Ala388Thr<br>;<br>p.Ala500Thr<br>;<br>p.Ala502Thr | 1 | FALSE | chr4:1807<br>167:G:A   | 69:chr4:18<br>07167:G:A       | 0.001041 |
| 62_c3-b | 62 | FBXW7                      | MODERATE           | c.1444G>T<br>;<br>c.1558G>T<br>;<br>c.1798G>T                                                                       | p.Asp482Tyr<br>;<br>p.Asp520Tyr<br>;<br>p.Asp600Tyr | 0 | FALSE | chr4:1532<br>45393:C:A | 69:chr4:15<br>3245393:C<br>:A | 0.001035 |
| 62_c3-b | 62 | BRAF                       | MODERATE           | c.1796C>T                                                                                                           | p.Thr599Ile                                         | 4 | FALSE | chr7:1404<br>53139:G:A | 69:chr7:14<br>0453139:G<br>:A | 0.000458 |
| 62_c3-b | 62 | TSC2                       | MODERATE           | c.1819G>A                                                                                                           | p.Ala607Thr                                         | 0 | FALSE | chr16:212<br>0559:G:A  | 69:chr16:2<br>120559:G:<br>A  | 0.000451 |

|         |    |                    |                    |                                                                           |                                                                                                              |   |       |                        |                           |          |
|---------|----|--------------------|--------------------|---------------------------------------------------------------------------|--------------------------------------------------------------------------------------------------------------|---|-------|------------------------|---------------------------|----------|
| 62_c3-b | 62 | EGFR;<br>EGFR-AS1  | MODERATE; MODIFIER | c.2305G>A;<br>; n.1257C>T                                                 | p.Val769Met;                                                                                                 | 3 | FALSE | chr7:5524<br>9007:G:A  | 69:chr7:55<br>249007:G:A  | 0.00044  |
| 62_c3-b | 62 | TP53               | MODERATE; HIGH     | c.363G>T;<br>c.480G>T;<br>c.84G>T;<br>c.3G>T                              | p.Met121Ile<br>;<br>p.Met160Ile<br>;<br>p.Met28Ile;<br>p.Met1?                                               | 4 | FALSE | chr17:757<br>8450:C:A  | 69:chr17:7<br>578450:C:A  | 0.000775 |
| 62_c3-b | 62 | MIR4673;<br>NOTCH1 | MODIFIER; MODERATE | n.*59G>T;<br>c.1433G>T                                                    | ; p.Cys478Phe                                                                                                | 0 | FALSE | chr9:1394<br>12212:C:A | 69:chr9:13<br>9412212:C:A | 0.000744 |
| 62_c3-b | 62 | KIT                | MODERATE           | c.154G>A                                                                  | p.Asp52Asn                                                                                                   | 7 | FALSE | chr4:5556<br>1764:G:A  | 69:chr4:55<br>561764:G:A  | 0.000436 |
| 62_c3-b | 62 | DDR2               | MODERATE           | c.313C>A                                                                  | p.Arg105Ser                                                                                                  | 2 | FALSE | chr1:1627<br>24541:C:A | 69:chr1:16<br>2724541:C:A | 0.001202 |
| 62_c3-b | 62 | NF1                | MODERATE           | c.2695T>G                                                                 | p.Leu899Val                                                                                                  | 3 | FALSE | chr17:295<br>56328:T:G | 69:chr17:2<br>9556328:T:G | 0.014532 |
| 62_c3-b | 62 | TP53               | MODERATE           | c.387T>A;<br>c.468T>A;<br>c.747T>A;<br>c.864T>A                           | p.Asn129Lys<br>;<br>p.Asn156Lys<br>;<br>p.Asn249Lys<br>;<br>p.Asn288Lys                                      | 2 | FALSE | chr17:757<br>7074:A:T  | 69:chr17:7<br>577074:A:T  | 0.000543 |
| 62_c3-b | 62 | TSC2               | MODERATE           | c.2702G>A                                                                 | p.Arg901His                                                                                                  | 0 | FALSE | chr16:212<br>6131:G:A  | 69:chr16:2<br>126131:G:A  | 0.000904 |
| 62_c3-b | 62 | TP53               | MODIFIER; MODERATE | c.-30A>G;<br>c.331A>G;<br>c.448A>G;<br>c.52A>G                            | ; p.Thr111Ala<br>;<br>p.Thr150Ala<br>; p.Thr18Ala                                                            | 1 | FALSE | chr17:757<br>8482:T:C  | 69:chr17:7<br>578482:T:C  | 0.000846 |
| 62_c3-b | 62 | ALK                | MODERATE           | c.4192C>T                                                                 | p.Pro1398Ser                                                                                                 | 1 | FALSE | chr2:2941<br>6761:G:A  | 69:chr2:29<br>416761:G:A  | 0.000514 |
| 62_c3-b | 62 | FGFR1              | MODERATE           | c.488G>T;<br>c.494G>T;<br>c.737G>T;<br>c.755G>T;<br>c.761G>T;<br>c.854G>T | p.Arg163Leu<br>;<br>p.Arg165Leu<br>;<br>p.Arg246Leu<br>;<br>p.Arg252Leu<br>;<br>p.Arg254Leu<br>; p.Arg285Leu | 1 | FALSE | chr8:3828<br>2202:C:A  | 69:chr8:38<br>282202:C:A  | 0.000859 |
| 62_c3-b | 62 | KDR                | MODERATE           | c.2323G>T                                                                 | p.Ala775Ser                                                                                                  | 1 | FALSE | chr4:5596<br>4914:C:A  | 69:chr4:55<br>964914:C:A  | 0.004656 |



|         |    |                    |                    |                                                       |                                                               |     |       |                        |                               |          |
|---------|----|--------------------|--------------------|-------------------------------------------------------|---------------------------------------------------------------|-----|-------|------------------------|-------------------------------|----------|
| 62_c3-b | 62 | NF1                | HIGH               | c.3049C>T                                             | p.Gln1017*                                                    | 2   | FALSE | chr17:295<br>57336:C:T | 69:chr17:2<br>9557336:C<br>:T | 0.000432 |
| 62_c3-b | 62 | MET                | MODERATE           | c.959C>T                                              | p.Ala320Val                                                   | 1   | FALSE | chr7:1163<br>40097:C:T | 69:chr7:11<br>6340097:C<br>:T | 0.000432 |
| 62_c3-b | 62 | TP53               | MODERATE; MODIFIER | c.104C>T;<br>c.221C>T;<br>c.-279C>T;<br>c.-360C>T     | p.Ala35Val;<br>p.Ala74Val;                                    | 1   | FALSE | chr17:757<br>9466:G:A  | 69:chr17:7<br>579466:G:<br>A  | 0.000951 |
| 62_c3-b | 62 | TP53               | MODIFIER; MODERATE | c.-9G>T;<br>c.352G>T;<br>c.469G>T;<br>c.73G>T         | p.Val118Phe<br>;<br>p.Val157Phe<br>;<br>p.Val25Phe            | 169 | FALSE | chr17:757<br>8461:C:A  | 69:chr17:7<br>578461:C:<br>A  | 0.001593 |
| 62_c3-b | 62 | CDH1               | MODERATE           | c.1528G>A                                             | p.Ala510Thr                                                   | 0   | FALSE | chr16:688<br>49625:G:A | 69:chr16:6<br>8849625:G<br>:A | 0.000446 |
| 62_c3-b | 62 | C9orf53;<br>CDKN2A | MODIFIER; MODERATE | n.*616G>A<br>;<br>c.*324C>T;<br>c.*45C>T;<br>c.401C>T | p.Ala134Val                                                   | 1   | FALSE | chr9:2197<br>0957:G:A  | 69:chr9:21<br>970957:G:<br>A  | 0.000715 |
| 62_c3-b | 62 | RET                | MODERATE           | c.1531G>A                                             | p.Glu511Lys                                                   | 1   | FALSE | chr10:436<br>07555:G:A | 69:chr10:4<br>3607555:G<br>:A | 0.000853 |
| 62_c3-b | 62 | PDGFRA             | MODERATE           | c.418G>A                                              | p.Val140Met                                                   | 2   | FALSE | chr4:5512<br>9884:G:A  | 69:chr4:55<br>129884:G:<br>A  | 0.000471 |
| 62_c3-b | 62 | ALK                | MODERATE           | c.874C>T                                              | p.Arg292Cys                                                   | 1   | FALSE | chr2:2991<br>7794:G:A  | 69:chr2:29<br>917794:G:<br>A  | 0.000492 |
| 62_c3-b | 62 | TP53               | MODERATE           | c.126G>T;<br>c.405G>T;<br>c.45G>T;<br>c.522G>T        | p.Arg42Ser;<br>p.Arg135Ser<br>;<br>p.Arg15Ser;<br>p.Arg174Ser | 2   | FALSE | chr17:757<br>8408:C:A  | 69:chr17:7<br>578408:C:<br>A  | 0.001264 |
| 62_c3-b | 62 | EGFR;<br>EGFR-AS1  | MODERATE; MODIFIER | c.2324G>A<br>;<br>n.1238C>T                           | p.Cys775Tyr<br>;                                              | 2   | FALSE | chr7:5524<br>9026:G:A  | 69:chr7:55<br>249026:G:<br>A  | 0.000497 |
| 62_c3-b | 62 | HOXD-AS2;<br>HOXD8 | MODIFIER; MODERATE | n.*692C>T<br>;<br>c.304G>A;<br>c.853G>A;<br>c.856G>A  | p.Glu102Lys<br>;<br>p.Glu285Lys<br>;<br>p.Glu286Lys           | 0   | FALSE | chr2:1769<br>96323:G:A | 69:chr2:17<br>6996323:G<br>:A | 0.000381 |

|         |    |        |                    |                                                       |                                                                         |     |       |                        |                               |          |
|---------|----|--------|--------------------|-------------------------------------------------------|-------------------------------------------------------------------------|-----|-------|------------------------|-------------------------------|----------|
| 62_c3-b | 62 | TSC1   | MODERATE           | c.2751G>T<br>;<br>c.2901G>T<br>;<br>c.2904G>T         | p.Arg917Ser<br>;<br>p.Arg967Ser<br>;<br>p.Arg968Ser                     | 0   | FALSE | chr9:1357<br>72642:C:A | 69:chr9:13<br>5772642:C<br>:A | 0.000489 |
| 62_c3-b | 62 | FGFR3  | MODIFIER; MODERATE | c.931-<br>398C>A;<br>;<br>c.1172C>A<br>;<br>c.1178C>A | p.Ala391Glu<br>;<br>p.Ala393Glu                                         | 34  | FALSE | chr4:1806<br>153:C:A   | 69:chr4:18<br>06153:C:A       | 0.001206 |
| 62_c3-b | 62 | CDH1   | MODERATE           | c.760G>A                                              | p.Asp254As<br>n                                                         | 0   | FALSE | chr16:688<br>44172:G:A | 69:chr16:6<br>8844172:G<br>:A | 0.000465 |
| 62_c3-b | 62 | CTNNB1 | MODERATE           | c.96C>A                                               | p.Asp32Glu                                                              | 0   | FALSE | chr3:4126<br>6099:C:A  | 69:chr3:41<br>266099:C:<br>A  | 0.001557 |
| 62_c3-b | 62 | CDH1   | MODERATE           | c.2074G>A                                             | p.Ala692Thr                                                             | 0   | FALSE | chr16:688<br>57439:G:A | 69:chr16:6<br>8857439:G<br>:A | 0.000751 |
| 62_c3-b | 62 | TP53   | MODERATE           | c.335A>G;<br>c.416A>G;<br>c.695A>G;<br>c.812A>G       | p.Glu112Gly<br>;<br>p.Glu139Gly<br>;<br>p.Glu232Gly<br>;<br>p.Glu271Gly | 8   | FALSE | chr17:757<br>7126:T:C  | 69:chr17:7<br>577126:T:<br>C  | 0.000551 |
| 62_c3-b | 62 | NF1    | HIGH               | c.5817C>A<br>;<br>c.5880C>A                           | p.Cys1939*;<br>p.Cys1960*                                               | 1   | FALSE | chr17:296<br>61923:C:A | 69:chr17:2<br>9661923:C<br>:A | 0.000907 |
| 62_c3-b | 62 | IGF1R  | MODERATE           | c.3637C>A<br>;<br>c.3640C>A                           | p.Gln1213Ly<br>s;<br>p.Gln1214Ly<br>s                                   | 0   | FALSE | chr15:994<br>91855:C:A | 69:chr15:9<br>9491855:C<br>:A | 0.000521 |
| 62_c3-b | 62 | AR     | MODERATE           | c.2324G>A<br>;<br>c.728G>A                            | p.Arg775His<br>;<br>p.Arg243His                                         | 0   | FALSE | chrX:6694<br>1680:G:A  | 69:chrX:66<br>941680:G:<br>A  | 0.001015 |
| 62_c3-b | 62 | PIK3CA | MODERATE           | c.1636C>A                                             | p.Gln546Lys                                                             | 127 | FALSE | chr3:1789<br>36094:C:A | 69:chr3:17<br>8936094:C<br>:A | 0.000467 |
| 62_c3-b | 62 | NF1    | MODERATE           | c.6943G>A<br>;<br>c.7006G>A                           | p.Ala2315Th<br>r;<br>p.Ala2336Th<br>r                                   | 2   | FALSE | chr17:296<br>67607:G:A | 69:chr17:2<br>9667607:G<br>:A | 0.00044  |
| 62_c3-b | 62 | EPHA3  | MODERATE           | c.1616G>A                                             | p.Ser539Asn                                                             | 0   | FALSE | chr3:8945<br>6440:G:A  | 69:chr3:89<br>456440:G:<br>A  | 0.000291 |
| 62_c3-b | 62 | PTEN   | MODERATE           | c.389G>A                                              | p.Arg130Gln                                                             | 89  | FALSE | chr10:896<br>92905:G:A | 69:chr10:8<br>9692905:G<br>:A | 0.000755 |
| 62_c3-b | 62 | CDH1   | MODERATE           | c.2246G>A                                             | p.Arg749Gln                                                             | 0   | FALSE | chr16:688<br>62158:G:A | 69:chr16:6<br>8862158:G<br>:A | 0.000578 |
| 62_c3-b | 62 | KIT    | MODERATE           | c.2071G>A<br>;<br>c.2083G>A                           | p.Glu691Lys<br>;<br>p.Glu695Lys                                         | 1   | FALSE | chr4:5559<br>5593:G:A  | 69:chr4:55<br>595593:G:<br>A  | 0.000442 |

|         |    |        |                    |                                                                                 |                                                                                                                 |   |       |                        |                               |          |
|---------|----|--------|--------------------|---------------------------------------------------------------------------------|-----------------------------------------------------------------------------------------------------------------|---|-------|------------------------|-------------------------------|----------|
| 62_c3-b | 62 | BRAF   | MODERATE           | c.1331G>A                                                                       | p.Arg444Gln                                                                                                     | 2 | FALSE | chr7:1404<br>81477:C:T | 69:chr7:14<br>0481477:C<br>:T | 0.00043  |
| 62_c3-b | 62 | NF1    | HIGH               | c.5294C>A<br>;<br>c.5357C>A                                                     | p.Ser1765*;<br>p.Ser1786*                                                                                       | 1 | FALSE | chr17:296<br>54605:C:A | 69:chr17:2<br>9654605:C<br>:A | 0.000435 |
| 62_c3-b | 62 | SMO    | MODERATE           | c.1045A>C                                                                       | p.Thr349Pro                                                                                                     | 0 | FALSE | chr7:1288<br>46115:A:C | 69:chr7:12<br>8846115:A<br>:C | 0.01241  |
| 62_c3-b | 62 | CDH1   | MODERATE           | c.779C>A                                                                        | p.Pro260His                                                                                                     | 0 | FALSE | chr16:688<br>44191:C:A | 69:chr16:6<br>8844191:C<br>:A | 0.000462 |
| 62_c3-b | 62 | FGFR1  | MODERATE           | c.1060C>T;<br>c.1066C>T;<br>c.1303C>T;<br>c.1327C>T;<br>c.1333C>T;<br>c.1426C>T | p.Arg354Trp<br>;<br>p.Arg356Trp<br>;<br>p.Arg435Trp<br>;<br>p.Arg443Trp<br>;<br>p.Arg445Trp<br>;<br>p.Arg476Trp | 2 | FALSE | chr8:3827<br>5843:G:A  | 69:chr8:38<br>275843:G:<br>A  | 0.000424 |
| 62_c3-b | 62 | KDR    | MODERATE           | c.869G>T                                                                        | p.Ser290Ile                                                                                                     | 1 | FALSE | chr4:5597<br>9578:C:A  | 69:chr4:55<br>979578:C:<br>A  | 0.000447 |
| 62_c3-b | 62 | PTEN   | MODERATE           | c.829A>T                                                                        | p.Thr277Ser                                                                                                     | 1 | FALSE | chr10:897<br>20678:A:T | 69:chr10:8<br>9720678:A<br>:T | 0.003363 |
| 62_c3-b | 62 | FGFR4  | MODERATE           | c.1978G>A<br>;<br>c.2062G>A<br>;<br>c.2182G>A                                   | p.Ala660Thr<br>;<br>p.Ala688Thr<br>;<br>p.Ala728Thr                                                             | 1 | FALSE | chr5:1765<br>24321:G:A | 69:chr5:17<br>6524321:G<br>:A | 0.00092  |
| 62_c3-b | 62 | CWH43  | MODERATE           | c.328C>T;<br>c.409C>T                                                           | p.Arg110Cys<br>;<br>p.Arg137Cys                                                                                 | 0 | FALSE | chr4:4899<br>4005:C:T  | 69:chr4:48<br>994005:C:<br>T  | 0.000733 |
| 62_c3-b | 62 | PIK3CA | MODERATE           | c.1727C>A                                                                       | p.Ser576Tyr                                                                                                     | 1 | FALSE | chr3:1789<br>37046:C:A | 69:chr3:17<br>8937046:C<br>:A | 0.000484 |
| 62_c3-b | 62 | NOTCH1 | MODERATE           | c.4918G>A                                                                       | p.Ala1640Thr                                                                                                    | 0 | FALSE | chr9:1393<br>99225:C:T | 69:chr9:13<br>9399225:C<br>:T | 0.000713 |
| 62_c3-b | 62 | FGFR1  | MODIFIER; MODERATE | c.-85G>T;<br>c.107G>T;<br>c.8G>T                                                | p.Ser36Ile;<br>p.Ser3Ile                                                                                        | 1 | FALSE | chr8:3831<br>4957:C:A  | 69:chr8:38<br>314957:C:<br>A  | 0.001166 |
| 62_c3-b | 62 | NTRK1  | MODERATE           | c.1738G>A<br>;<br>c.1828G>A<br>;<br>c.1846G>A                                   | p.Asp580Asn;<br>p.Asp610Asn;<br>p.Asp616Asn                                                                     | 1 | FALSE | chr1:1568<br>48954:G:A | 69:chr1:15<br>6848954:G<br>:A | 0.000545 |
| 62_c3-b | 62 | DDR2   | MODERATE           | c.2560G>A                                                                       | p.Asp854Asn                                                                                                     | 3 | FALSE | chr1:1627<br>50028:G:A | 69:chr1:16<br>2750028:G<br>:A | 0.00031  |

|         |    |                           |                    |                                                 |                                                     |   |       |                             |                                |          |
|---------|----|---------------------------|--------------------|-------------------------------------------------|-----------------------------------------------------|---|-------|-----------------------------|--------------------------------|----------|
| 62_c3-b | 62 | MET                       | MODERATE           | c.1132G>A                                       | p.Val378Ile                                         | 1 | FALSE | chr7:1163<br>40270:G:A      | 69:chr7:11<br>6340270:G<br>:A  | 0.000413 |
| 62_c3-b | 62 | VHL                       | MODIFIER; MODERATE | c.341-<br>3249C>A;<br>; c.365C>A                | p.Ala122Glu                                         | 0 | FALSE | chr3:1018<br>8222:C:A       | 69:chr3:10<br>188222:C:<br>A   | 0.000551 |
| 62_c3-b | 62 | PDGFRA                    | MODERATE           | c.2824T>C                                       | p.Ser942Pro                                         | 1 | FALSE | chr4:5515<br>5225:T:C       | 69:chr4:55<br>155225:T:<br>C   | 0.000758 |
| 62_c3-b | 62 | FLT3                      | MODERATE           | c.2464G>A                                       | p.Gly822Arg                                         | 0 | FALSE | chr13:285<br>92681:C:T      | 69:chr13:2<br>8592681:C<br>:T  | 0.00071  |
| 62_c3-b | 62 | FBXW7                     | MODERATE           | c.1069G>A<br>;<br>; c.1309G>A<br>; c.955G>A     | p.Gly357Arg<br>;<br>p.Gly437Arg<br>;<br>p.Gly319Arg | 0 | FALSE | chr4:1532<br>49469:C:T      | 69:chr4:15<br>3249469:C<br>:T  | 0.00049  |
| 62_c3-b | 62 | CTNNB1                    | MODERATE           | c.1000G>A                                       | p.Glu334Lys                                         | 0 | FALSE | chr3:4126<br>8762:G:A       | 69:chr3:41<br>268762:G:<br>A   | 0.000454 |
| 62_c3-b | 62 | CTNNB1                    | MODERATE           | c.110C>A                                        | p.Ser37Tyr                                          | 0 | FALSE | chr3:4126<br>6113:C:A       | 69:chr3:41<br>266113:C:<br>A   | 0.001236 |
| 62_c3-b | 62 | PTEN                      | MODERATE           | c.700C>T                                        | p.Arg234Trp                                         | 4 | FALSE | chr10:897<br>17675:C:T      | 69:chr10:8<br>9717675:C<br>:T  | 0.000446 |
| 62_c3-b | 62 | ATM                       | MODERATE           | c.8981A>G                                       | p.Asn2994Ser                                        | 0 | FALSE | chr11:108<br>235939:A:<br>G | 69:chr11:1<br>08235939:<br>A:G | 0.00051  |
| 62_c3-b | 62 | PTEN                      | MODERATE           | c.421C>A                                        | p.His141Asn                                         | 2 | FALSE | chr10:896<br>92937:C:A      | 69:chr10:8<br>9692937:C<br>:A  | 0.000875 |
| 62_c3-b | 62 | EGFR;<br>EGFR-AS1         | MODERATE; MODIFIER | c.2527G>A<br>; n.-1C>T                          | p.Val843Ile;                                        | 6 | FALSE | chr7:5525<br>9469:G:A       | 69:chr7:55<br>259469:G:<br>A   | 0.000572 |
| 62_c3-b | 62 | CDKN2B;<br>CDKN2B-<br>AS1 | MODIFIER; MODERATE | c.*199C>T;<br>c.313C>T;<br>n.371+109<br>30G>A   | p.Arg105Trp                                         | 0 | FALSE | chr9:2200<br>6090:G:A       | 69:chr9:22<br>006090:G:<br>A   | 0.000729 |
| 62_c3-b | 62 | KIT                       | MODERATE           | c.389A>G                                        | p.Asn130Ser                                         | 3 | FALSE | chr4:5556<br>4501:A:G       | 69:chr4:55<br>564501:A:<br>G   | 0.000507 |
| 62_c3-b | 62 | PIK3CA                    | MODERATE           | c.1022C>T                                       | p.Ala341Val                                         | 2 | FALSE | chr3:1789<br>21540:C:T      | 69:chr3:17<br>8921540:C<br>:T  | 0.000457 |
| 62_c3-b | 62 | PDGFRA                    | MODERATE           | c.1526C>A                                       | p.Ala509Asp                                         | 1 | FALSE | chr4:5513<br>9865:C:A       | 69:chr4:55<br>139865:C:<br>A   | 0.000894 |
| 62_c3-b | 62 | FGFR2                     | MODIFIER; HIGH     | n.936C>T;<br>c.289C>T;<br>c.367C>T;<br>c.634C>T | p.Gln97*;<br>p.Gln123*;<br>p.Gln212*                | 2 | FALSE | chr10:123<br>298220:G:<br>A | 69:chr10:1<br>23298220:<br>G:A | 0.000699 |

|         |    |                    |                            |                                                           |                                                                         |    |       |                             |                                |          |
|---------|----|--------------------|----------------------------|-----------------------------------------------------------|-------------------------------------------------------------------------|----|-------|-----------------------------|--------------------------------|----------|
| 62_c3-b | 62 | TP53               | MODERATE                   | c.371G>A;<br>c.452G>A;<br>c.731G>A;<br>c.848G>A           | p.Arg124His<br>;<br>p.Arg151His<br>;<br>p.Arg244His<br>;<br>p.Arg283His | 24 | FALSE | chr17:757<br>7090:C:T       | 69:chr17:7<br>577090:C:<br>T   | 0.000844 |
| 62_c3-b | 62 | MAP2K1             | MODERATE                   | c.198C>A                                                  | p.Asp66Glu                                                              | 4  | FALSE | chr15:667<br>27482:C:A      | 69:chr15:6<br>6727482:C<br>:A  | 0.000859 |
| 62_c3-b | 62 | EGFR               | MODERATE                   | c.818C>A                                                  | p.Thr273Asn                                                             | 1  | FALSE | chr7:5522<br>1774:C:A       | 69:chr7:55<br>221774:C:<br>A   | 0.000546 |
| 62_c3-b | 62 | EGFR;<br>EGFR-AS1  | LOW; MODIFIER              | c.2472C>A<br>; n.-1G>T                                    | p.Gly824Gly<br>;                                                        | 1  | FALSE | chr7:5525<br>9414:C:A       | 69:chr7:55<br>259414:C:<br>A   | 0.002774 |
| 62_c3-b | 62 | TSC1               | MODERATE                   | c.437G>T;<br>c.590G>T                                     | p.Cys146Ph<br>e;<br>p.Cys197Ph<br>e                                     | 0  | FALSE | chr9:1357<br>97279:C:A      | 69:chr9:13<br>5797279:C<br>:A  | 0.000519 |
| 62_c3-b | 62 | C9orf53;<br>CDKN2A | MODIFIER; MODERATE;<br>LOW | n.*616T>C<br>;<br>c.*246A>G<br>;<br>c.323A>G;<br>c.366A>G | p.Asp108Gly<br>;<br>p.Arg122Arg                                         | 2  | FALSE | chr9:2197<br>1035:T:C       | 69:chr9:21<br>971035:T:<br>C   | 0.000721 |
| 62_c3-b | 62 | TSC1               | HIGH                       | c.1921C>T;<br>c.2071C>T;<br>c.2074C>T                     | p.Arg641*;<br>p.Arg691*;<br>p.Arg692*                                   | 0  | FALSE | chr9:1357<br>79172:G:A      | 69:chr9:13<br>5779172:G<br>:A  | 0.000495 |
| 62_c3-b | 62 | PDGFRA             | MODERATE                   | c.1202C>A                                                 | p.Ala401Asp                                                             | 1  | FALSE | chr4:5513<br>6880:C:A       | 69:chr4:55<br>136880:C:<br>A   | 0.000582 |
| 62_c3-b | 62 | TP53               | MODERATE                   | c.364G>T;<br>c.445G>T;<br>c.724G>T;<br>c.841G>T           | p.Asp122Tyr<br>;<br>p.Asp149Tyr<br>;<br>p.Asp242Tyr<br>;<br>p.Asp281Tyr | 28 | FALSE | chr17:757<br>7097:C:A       | 69:chr17:7<br>577097:C:<br>A   | 0.00085  |
| 62_c3-b | 62 | FLT3               | HIGH                       | c.1243G>T                                                 | p.Glu415*                                                               | 0  | FALSE | chr13:286<br>11388:C:A      | 69:chr13:2<br>8611388:C<br>:A  | 0.000558 |
| 62_c3-b | 62 | EGFR;<br>EGFR-AS1  | MODERATE; MODIFIER         | c.2548C>A<br>; n.-1G>T                                    | p.His850Asn<br>;                                                        | 1  | FALSE | chr7:5525<br>9490:C:A       | 69:chr7:55<br>259490:C:<br>A   | 0.000875 |
| 62_c3-b | 62 | ATM                | HIGH                       | c.8284C>T                                                 | p.Gln2762*                                                              | 0  | FALSE | chr11:108<br>213964:C:<br>T | 69:chr11:1<br>08213964:<br>C:T | 0.000539 |
| 62_c3-b | 62 | NF1                | MODERATE                   | c.5420G>A<br>;<br>c.5483G>A                               | p.Arg1807Gl<br>n;<br>p.Arg1828Gl<br>n                                   | 2  | FALSE | chr17:296<br>54731:G:A      | 69:chr17:2<br>9654731:G<br>:A  | 0.000366 |
| 62_c3-b | 62 | KIT                | MODERATE                   | c.734C>T                                                  | p.Thr245Me<br>t                                                         | 1  | FALSE | chr4:5556<br>5910:C:T       | 69:chr4:55<br>565910:C:<br>T   | 0.000457 |

|         |    |                             |                    |                                                                                              |                                                                |   |       |                             |                                |          |
|---------|----|-----------------------------|--------------------|----------------------------------------------------------------------------------------------|----------------------------------------------------------------|---|-------|-----------------------------|--------------------------------|----------|
| 62_c3-b | 62 | PIK3R1                      | MODERATE           | c.1046G>A;<br>;<br>c.1136G>A;<br>;<br>c.1946G>A;<br>;<br>c.857G>A                            | p.Arg349Gln;<br>p.Arg379Gln;<br>p.Arg649Gln;<br>p.Arg286Gln    | 4 | FALSE | chr5:6759<br>2130:G:A       | 69:chr5:67<br>592130:G:<br>A   | 0.000974 |
| 62_c3-b | 62 | FBXW7                       | MODERATE           | c.1039C>T;<br>c.1153C>T;<br>c.1393C>T                                                        | p.Arg347Cys;<br>;<br>p.Arg385Cys;<br>p.Arg465Cys               | 0 | FALSE | chr4:1532<br>49385:G:A      | 69:chr4:15<br>3249385:G:<br>:A | 0.000735 |
| 62_c3-b | 62 | KRAS                        | HIGH               | c.292G>T                                                                                     | p.Glu98*                                                       | 1 | FALSE | chr12:253<br>78706:C:A      | 69:chr12:2<br>5378706:C:<br>:A | 0.000554 |
| 62_c3-b | 62 | CDH1                        | MODERATE           | c.1676G>A                                                                                    | p.Ser559Asn                                                    | 0 | FALSE | chr16:688<br>53293:G:A      | 69:chr16:6<br>8853293:G:<br>:A | 0.00073  |
| 62_c3-b | 62 | TSC1                        | MODERATE           | c.530G>A;<br>c.683G>A                                                                        | p.Arg177Gln;<br>p.Arg228Gln                                    | 0 | FALSE | chr9:1357<br>96804:C:T      | 69:chr9:13<br>5796804:C:<br>:T | 0.000519 |
| 62_c3-b | 62 | EGFR                        | MODERATE           | c.608G>A                                                                                     | p.Gly203Glu                                                    | 1 | FALSE | chr7:5521<br>9035:G:A       | 69:chr7:55<br>219035:G:<br>A   | 0.000582 |
| 62_c3-b | 62 | ERBB2;<br>MIEN1;<br>MIR4728 | MODERATE; MODIFIER | c.2236G>A;<br>;<br>c.2281G>A;<br>;<br>c.2326G>A;<br>n.2650G>A;<br>;<br>c.*388C>T;<br>n.-1G>A | p.Gly746Ser;<br>;<br>p.Gly761Ser;<br>;<br>p.Gly776Ser;<br>;    | 5 | FALSE | chr17:378<br>80997:G:A      | 69:chr17:3<br>7880997:G:<br>:A | 0.000883 |
| 62_c3-b | 62 | TP53                        | MODERATE           | c.125G>A;<br>c.404G>A;<br>c.44G>A;<br>c.521G>A                                               | p.Arg42Lys;<br>p.Arg135Lys;<br>;<br>p.Arg15Lys;<br>p.Arg174Lys | 5 | FALSE | chr17:757<br>8409:C:T       | 69:chr17:7<br>578409:C:<br>T   | 0.001266 |
| 62_c3-b | 62 | FGFR2                       | MODIFIER; MODERATE | c.110-<br>14053A>G;<br>c.110-<br>933A>G;<br>n.757-<br>14053A>G;<br>c.302A>G                  | p.Asp101Gly                                                    | 1 | FALSE | chr10:123<br>325026:T:<br>C | 69:chr10:1<br>23325026:<br>T:C | 0.000733 |
| 62_c3-b | 62 | EPHA3                       | MODERATE           | c.2306G>A                                                                                    | p.Arg769His                                                    | 0 | FALSE | chr3:8948<br>0469:G:A       | 69:chr3:89<br>480469:G:<br>A   | 0.000293 |
| 62_c3-b | 62 | TSC1                        | MODERATE           | c.416G>A;<br>c.569G>A                                                                        | p.Arg139His;<br>p.Arg190His                                    | 0 | FALSE | chr9:1357<br>97300:C:T      | 69:chr9:13<br>5797300:C:<br>:T | 0.000498 |

|         |    |                    |                    |                                                       |                                                               |     |       |                        |                               |          |
|---------|----|--------------------|--------------------|-------------------------------------------------------|---------------------------------------------------------------|-----|-------|------------------------|-------------------------------|----------|
| 62_c3-b | 62 | CDH1               | MODERATE           | c.1711G>A                                             | p.Gly571Ser                                                   | 0   | FALSE | chr16:688<br>53328:G:A | 69:chr16:6<br>8853328:G<br>:A | 0.00062  |
| 62_c3-b | 62 | IGF1R              | MODERATE           | c.3821G>A<br>;<br>c.3824G>A                           | p.Arg1274Gln;<br>p.Arg1275Gln                                 | 0   | FALSE | chr15:995<br>00391:G:A | 69:chr15:9<br>9500391:G<br>:A | 0.000556 |
| 62_c3-b | 62 | RET                | MODERATE           | c.2038G>A                                             | p.Ala680Thr                                                   | 1   | FALSE | chr10:436<br>10086:G:A | 69:chr10:4<br>3610086:G<br>:A | 0.000448 |
| 62_c3-b | 62 | TP53               | MODERATE; MODIFIER | c.206C>T;<br>c.89C>T; c.-<br>279C>T; c.-<br>360C>T    | p.Ala69Val;<br>p.Ala30Val;                                    | 3   | FALSE | chr17:757<br>9481:G:A  | 69:chr17:7<br>579481:G:<br>A  | 0.000916 |
| 62_c3-b | 62 | KIT                | MODERATE           | c.235C>A                                              | p.Gln79Lys                                                    | 2   | FALSE | chr4:5556<br>1845:C:A  | 69:chr4:55<br>561845:C:<br>A  | 0.001822 |
| 62_c3-b | 62 | NF1                | MODERATE           | c.1319G>A                                             | p.Arg440Gln                                                   | 1   | FALSE | chr17:295<br>33316:G:A | 69:chr17:2<br>9533316:G<br>:A | 0.000517 |
| 62_c3-b | 62 | NF1                | MODERATE           | c.5426G>A<br>;<br>c.5489G>A                           | p.Arg1809His;<br>p.Arg1830His                                 | 1   | FALSE | chr17:296<br>54737:G:A | 69:chr17:2<br>9654737:G<br>:A | 0.00053  |
| 62_c3-b | 62 | C9orf53;<br>CDKN2A | MODIFIER; MODERATE | n.*616G>A<br>;<br>c.*218C>T;<br>c.295C>T;<br>c.338C>T | p.Arg99Trp;<br>p.Pro113Leu                                    | 2   | FALSE | chr9:2197<br>1063:G:A  | 69:chr9:21<br>971063:G:<br>A  | 0.000691 |
| 62_c3-b | 62 | BRAF               | MODERATE           | c.914C>T                                              | p.Ala305Val                                                   | 2   | FALSE | chr7:1405<br>00228:G:A | 69:chr7:14<br>0500228:G<br>:A | 0.000491 |
| 62_c3-b | 62 | TP53               | MODERATE           | c.128G>T;<br>c.407G>T;<br>c.47G>T;<br>c.524G>T        | p.Arg43Leu;<br>p.Arg136Leu<br>;<br>p.Arg16Leu;<br>p.Arg175Leu | 979 | FALSE | chr17:757<br>8406:C:A  | 69:chr17:7<br>578406:C:<br>A  | 0.000636 |
| 62_c3-b | 62 | NTRK2              | MODERATE           | c.413T>C                                              | p.Leu138Pro                                                   | 0   | FALSE | chr9:8732<br>2812:T:C  | 69:chr9:87<br>322812:T:<br>C  | 0.000639 |
| 62_c3-b | 62 | CTNNB1             | MODERATE           | c.125C>A                                              | p.Thr42Lys                                                    | 0   | FALSE | chr3:4126<br>6128:C:A  | 69:chr3:41<br>266128:C:<br>A  | 0.0009   |
| 62_c3-b | 62 | PDGFRA             | MODERATE           | c.2485G>A                                             | p.Gly829Arg                                                   | 1   | FALSE | chr4:5515<br>2053:G:A  | 69:chr4:55<br>152053:G:<br>A  | 0.000547 |
| 62_c3-b | 62 | MET                | MODERATE           | c.1690G>A                                             | p.Ala564Thr                                                   | 1   | FALSE | chr7:1163<br>81068:G:A | 69:chr7:11<br>6381068:G<br>:A | 0.000683 |

|         |    |        |                    |                                                                           |                                                                                                                 |   |       |                             |                                |          |
|---------|----|--------|--------------------|---------------------------------------------------------------------------|-----------------------------------------------------------------------------------------------------------------|---|-------|-----------------------------|--------------------------------|----------|
| 62_c3-b | 62 | TP53   | MODERATE           | c.128G>T;<br>c.209G>T;<br>c.488G>T;<br>c.605G>T                           | p.Arg43Leu;<br>p.Arg70Leu;<br>p.Arg163Leu<br>;<br>p.Arg202Leu                                                   | 4 | FALSE | chr17:757<br>8244:C:A       | 69:chr17:7<br>578244:C:<br>A   | 0.000893 |
| 62_c3-b | 62 | EGFR   | MODERATE           | c.787A>G                                                                  | p.Thr263Ala                                                                                                     | 6 | FALSE | chr7:5522<br>1743:A:G       | 69:chr7:55<br>221743:A:<br>G   | 0.000561 |
| 62_c3-b | 62 | NTRK2  | MODERATE           | c.1408G>A<br>;<br>c.1456G>A                                               | p.Val470Ile;<br>p.Val486Ile                                                                                     | 0 | FALSE | chr9:8748<br>2169:G:A       | 69:chr9:87<br>482169:G:<br>A   | 0.000413 |
| 62_c3-b | 62 | PIK3CA | MODERATE           | c.1255C>A                                                                 | p.His419Asn                                                                                                     | 1 | FALSE | chr3:1789<br>27977:C:A      | 69:chr3:17<br>8927977:C<br>:A  | 0.002193 |
| 62_c3-b | 62 | FGFR1  | MODERATE           | c.487C>T;<br>c.493C>T;<br>c.736C>T;<br>c.754C>T;<br>c.760C>T;<br>c.853C>T | p.Arg163Trp<br>;<br>p.Arg165Trp<br>;<br>p.Arg246Trp<br>;<br>p.Arg252Trp<br>;<br>p.Arg254Trp<br>;<br>p.Arg285Trp | 1 | FALSE | chr8:3828<br>2203:G:A       | 69:chr8:38<br>282203:G:<br>A   | 0.000861 |
| 62_c3-b | 62 | FGFR3  | MODIFIER; MODERATE | c.931-<br>308G>A;<br>c.1262G>A<br>;<br>c.1268G>A                          | p.Arg421Gln<br>;<br>p.Arg423Gln                                                                                 | 1 | FALSE | chr4:1806<br>243:G:A        | 69:chr4:18<br>06243:G:A        | 0.001049 |
| 62_c3-b | 62 | PIK3CA | MODERATE           | c.3180C>A                                                                 | p.His1060Gln                                                                                                    | 2 | FALSE | chr3:1789<br>52125:C:A      | 69:chr3:17<br>8952125:C<br>:A  | 0.000553 |
| 62_c3-b | 62 | ATM    | MODERATE           | c.5713T>C                                                                 | p.Ser1905Pro                                                                                                    | 0 | FALSE | chr11:108<br>178662:T:<br>C | 69:chr11:1<br>08178662:<br>T:C | 0.000444 |
| 62_c3-b | 62 | CDKN2A | MODIFIER; MODERATE | c.194-<br>3568A>C;<br>c.52A>C                                             | p.Thr18Pro                                                                                                      | 1 | FALSE | chr9:2197<br>4775:T:G       | 69:chr9:21<br>974775:T:<br>G   | 0.006079 |
| 62_c3-b | 62 | NOTCH1 | MODERATE           | c.5885G>A                                                                 | p.Arg1962His                                                                                                    | 0 | FALSE | chr9:1393<br>95053:C:T      | 69:chr9:13<br>9395053:C<br>:T  | 0.000928 |
| 62_c3-b | 62 | GNA11  | MODERATE           | c.1030G>A                                                                 | p.Val344Met                                                                                                     | 1 | FALSE | chr19:312<br>1127:G:A       | 69:chr19:3<br>121127:G:<br>A   | 0.000749 |
| 62_c3-b | 62 | KDR    | MODERATE           | c.115G>T                                                                  | p.Asp39Tyr                                                                                                      | 1 | FALSE | chr4:5598<br>7310:C:A       | 69:chr4:55<br>987310:C:<br>A   | 0.000405 |
| 62_c3-b | 62 | CTNNB1 | MODERATE           | c.953G>A                                                                  | p.Ser318Asn                                                                                                     | 0 | FALSE | chr3:4126<br>8715:G:A       | 69:chr3:41<br>268715:G:<br>A   | 0.000605 |
| 62_c3-b | 62 | KDR    | MODERATE           | c.583G>T                                                                  | p.Ala195Ser                                                                                                     | 1 | FALSE | chr4:5598<br>1116:C:A       | 69:chr4:55<br>981116:C:<br>A   | 0.000386 |



|         |    |                 |                    |                                                 |                                                           |    |       |                             |                                |          |
|---------|----|-----------------|--------------------|-------------------------------------------------|-----------------------------------------------------------|----|-------|-----------------------------|--------------------------------|----------|
| 62_c3-b | 62 | TP53            | MODERATE           | c.181T>C;<br>c.262T>C;<br>c.541T>C;<br>c.658T>C | p.Tyr61His;<br>p.Tyr88His;<br>p.Tyr181His;<br>p.Tyr220His | 16 | FALSE | chr17:757<br>8191:A:G       | 69:chr17:7<br>578191:A:<br>G   | 0.000805 |
| 62_c3-b | 62 | EPHA3           | HIGH               | c.1515C>A                                       | p.Tyr505*                                                 | 0  | FALSE | chr3:8944<br>8551:C:A       | 69:chr3:89<br>448551:C:<br>A   | 0.000669 |
| 62_c3-b | 62 | EGFR            | MODERATE           | c.3289G>A                                       | p.Val1097Ile                                              | 1  | FALSE | chr7:5527<br>2966:G:A       | 69:chr7:55<br>272966:G:<br>A   | 0.000731 |
| 62_c3-b | 62 | ATM             | HIGH               | c.2558C>A                                       | p.Ser853*                                                 | 0  | FALSE | chr11:108<br>137989:C:<br>A | 69:chr11:1<br>08137989:<br>C:A | 0.000804 |
| 62_c3-b | 62 | NF1             | MODERATE           | c.7747C>T;<br>c.7810C>T                         | p.Leu2583P<br>he;<br>p.Leu2604P<br>he                     | 1  | FALSE | chr17:296<br>84049:C:T      | 69:chr17:2<br>9684049:C<br>:T  | 0.000446 |
| 62_c3-b | 62 | EPHA3           | MODERATE           | c.1234G>A                                       | p.Val412Ile                                               | 0  | FALSE | chr3:8939<br>1168:G:A       | 69:chr3:89<br>391168:G:<br>A   | 0.000685 |
| 62_c3-b | 62 | KDR             | HIGH               | c.2830C>T                                       | p.Arg944*                                                 | 1  | FALSE | chr4:5596<br>1110:G:A       | 69:chr4:55<br>961110:G:<br>A   | 0.000552 |
| 62_c3-b | 62 | FGFR3           | MODERATE           | c.1177G>A<br>;<br>c.1513G>A<br>;<br>c.1519G>A   | p.Val393Ile;<br>p.Val505Ile;<br>p.Val507Ile               | 1  | FALSE | chr4:1807<br>182:G:A        | 69:chr4:18<br>07182:G:A        | 0.00197  |
| 62_c3-b | 62 | TP53            | MODIFIER; MODERATE | c.-61G>T;<br>c.21G>T;<br>c.300G>T;<br>c.417G>T  | p.Lys7Asn;<br>p.Lys100Asn<br>;<br>p.Lys139Asn             | 7  | FALSE | chr17:757<br>8513:C:A       | 69:chr17:7<br>578513:C:<br>A   | 0.000745 |
| 62_c3-b | 62 | HRAS;<br>LRRC56 | MODERATE; MODIFIER | c.183G>T;<br>c.-506C>A                          | p.Gln61His;                                               | 15 | FALSE | chr11:533<br>873:C:A        | 69:chr11:5<br>33873:C:A        | 0.000527 |
| 62_c3-b | 62 | CWH43           | MODERATE           | c.1532C>T;<br>c.1613C>T                         | p.Ser511Leu<br>;<br>p.Ser538Leu                           | 0  | FALSE | chr4:4903<br>4687:C:T       | 69:chr4:49<br>034687:C:<br>T   | 0.000469 |
| 62_c3-b | 62 | ATM             | MODERATE           | c.6154G>A                                       | p.Glu2052Ly<br>s                                          | 0  | FALSE | chr11:108<br>186796:G:<br>A | 69:chr11:1<br>08186796:<br>G:A | 0.000426 |
| 62_c3-b | 62 | FBXW7           | MODERATE           | c.1204G>T<br>;<br>c.1318G>T<br>;<br>c.1558G>T   | p.Asp402Tyr<br>;<br>p.Asp440Tyr<br>;<br>p.Asp520Tyr       | 0  | FALSE | chr4:1532<br>47244:C:A      | 69:chr4:15<br>3247244:C<br>:A  | 0.000466 |
| 62_c3-b | 62 | RET             | MODERATE           | c.1690A>C                                       | p.Thr564Pro                                               | 1  | FALSE | chr10:436<br>08342:A:C      | 69:chr10:4<br>3608342:A<br>:C  | 0.009893 |

|         |    |                           |                    |                                                                                                                            |                                                                         |      |       |                        |                               |          |
|---------|----|---------------------------|--------------------|----------------------------------------------------------------------------------------------------------------------------|-------------------------------------------------------------------------|------|-------|------------------------|-------------------------------|----------|
| 62_c3-b | 62 | FBXW7                     | MODERATE           | c.1040G>T<br>;<br>c.1154G>T<br>;<br>c.1394G>T                                                                              | p.Arg347Leu<br>;<br>p.Arg385Leu<br>;<br>p.Arg465Leu                     | 0    | FALSE | chr4:1532<br>49384:C:A | 69:chr4:15<br>3249384:C<br>:A | 0.000736 |
| 62_c3-b | 62 | NOTCH1                    | MODERATE           | c.3859C>T                                                                                                                  | p.Arg1287C<br>ys                                                        | 0    | FALSE | chr9:1394<br>01210:G:A | 69:chr9:13<br>9401210:G<br>:A | 0.000556 |
| 62_c3-b | 62 | CSDE1;<br>NRAS            | MODIFIER; MODERATE | c.*2430A><br>G;<br>c.*2523A><br>G;<br>c.*2817A><br>G;<br>c.*2910A><br>G;<br>c.*2964A><br>G;<br>c.*3057A><br>G;<br>c.182A>G | ; p.Gln61Arg                                                            | 1103 | FALSE | chr1:1152<br>56529:T:C | 69:chr1:11<br>5256529:T<br>:C | 0.324876 |
| 62_c3-b | 62 | GAPDH;<br>IFFO1;<br>NCPD2 | MODERATE; MODIFIER | c.148G>A;<br>c.274G>A;<br>c.*1743C><br>T;<br>c.*1746C><br>T;<br>c.*1770C><br>T;<br>n.*2798C><br>T;<br>c.*4252G><br>A       | p.Ala50Thr;<br>p.Ala92Thr;                                              | 0    | FALSE | chr12:664<br>6123:G:A  | 69:chr12:6<br>646123:G<br>:A  | 0.000762 |
| 62_c3-b | 62 | GNA11                     | MODERATE           | c.1052T>C                                                                                                                  | p.Leu351Pro                                                             | 1    | FALSE | chr19:312<br>1149:T:C  | 69:chr19:3<br>121149:T<br>:C  | 0.000578 |
| 62_c3-b | 62 | TP53                      | MODIFIER; MODERATE | c.*137A>G<br>;<br>c.*225A>G<br>;<br>c.1001A>G<br>;<br>c.1118A>G<br>;<br>c.641A>G;<br>;<br>c.722A>G                         | p.Lys334Arg<br>;<br>p.Lys373Arg<br>;<br>p.Lys214Arg<br>;<br>p.Lys241Arg | 1    | FALSE | chr17:757<br>2991:T:C  | 69:chr17:7<br>572991:T<br>:C  | 0.00148  |
| 62_c3-b | 62 | IGF1R                     | MODERATE           | c.3905T>C;<br>c.3908T>C                                                                                                    | p.Val1302Ala;<br>p.Val1303Ala                                           | 0    | FALSE | chr15:995<br>00475:T:C | 69:chr15:9<br>9500475:T<br>:C | 0.004827 |
| 62_c3-b | 62 | FGFR4                     | MODIFIER; MODERATE | c.1058-<br>174G>A;<br>c.1078G>A                                                                                            | ; p.Ala360Thr                                                           | 1    | FALSE | chr5:1765<br>20159:G:A | 69:chr5:17<br>6520159:G<br>:A | 0.000657 |

|         |    |                             |                    |                                                                                               |                                                               |   |       |                             |                                |          |
|---------|----|-----------------------------|--------------------|-----------------------------------------------------------------------------------------------|---------------------------------------------------------------|---|-------|-----------------------------|--------------------------------|----------|
| 62_c3-b | 62 | NTRK1                       | MODERATE           | c.1940T>G<br>;<br>c.2030T>G<br>;<br>c.2048T>G                                                 | p.Val647Gly;<br>p.Val677Gly;<br>p.Val683Gly                   | 2 | FALSE | chr1:1568<br>49792:T:G      | 69:chr1:15<br>6849792:T<br>:G  | 0.013151 |
| 62_c3-b | 62 | ERBB2;<br>MIEN1;<br>MIR4728 | MODERATE; MODIFIER | c.2261G>A<br>;<br>c.2306G>A<br>;<br>c.2351G>A<br>;<br>n.2675G>A<br>;<br>c.*388C>T;<br>n.-1G>A | p.Arg754His<br>;<br>p.Arg769His<br>;<br>p.Arg784His<br>;      | 1 | FALSE | chr17:378<br>81022:G:A      | 69:chr17:3<br>7881022:G<br>:A  | 0.000515 |
| 62_c3-b | 62 | TP53                        | MODERATE           | c.145G>T;<br>c.226G>T;<br>c.505G>T;<br>c.622G>T                                               | p.Asp49Tyr;<br>p.Asp76Tyr;<br>p.Asp169Tyr<br>;<br>p.Asp208Tyr | 2 | FALSE | chr17:757<br>8227:C:A       | 69:chr17:7<br>578227:C:<br>A   | 0.000483 |
| 62_c3-b | 62 | PDGFRA                      | MODERATE           | c.1876G>A                                                                                     | p.Val626Me<br>t                                               | 1 | FALSE | chr4:5514<br>3644:G:A       | 69:chr4:55<br>143644:G:<br>A   | 0.000823 |
| 62_c3-b | 62 | ATM                         | MODERATE           | c.3925G>A                                                                                     | p.Ala1309Th<br>r                                              | 0 | FALSE | chr11:108<br>155132:G:<br>A | 69:chr11:1<br>08155132:<br>G:A | 0.000416 |
| 62_c3-b | 62 | EPHA3                       | MODERATE           | c.1760A>T                                                                                     | p.His587Leu                                                   | 0 | FALSE | chr3:8945<br>7279:A:T       | 69:chr3:89<br>457279:A:<br>T   | 0.000425 |
| 62_c3-b | 62 | HGF                         | MODERATE           | c.1255C>T;<br>c.1270C>T                                                                       | p.Arg419Cys<br>;<br>p.Arg424Cys                               | 0 | FALSE | chr7:8135<br>0062:G:A       | 69:chr7:81<br>350062:G:<br>A   | 0.000572 |
| 62_c3-b | 62 | EPHA3                       | MODERATE           | c.1535G>A                                                                                     | p.Arg512Gln                                                   | 0 | FALSE | chr3:8944<br>8571:G:A       | 69:chr3:89<br>448571:G:<br>A   | 0.000654 |
| 62_c3-b | 62 | EPHA3                       | MODERATE           | c.237C>A                                                                                      | p.Asn79Lys                                                    | 0 | FALSE | chr3:8925<br>9093:C:A       | 69:chr3:89<br>259093:C:<br>A   | 0.00072  |
| 62_c3-b | 62 | NTRK2                       | MODERATE           | c.1628A>G<br>;<br>c.1676A>G                                                                   | p.Glu543Gly<br>;<br>p.Glu559Gly                               | 0 | FALSE | chr9:8754<br>9119:A:G       | 69:chr9:87<br>549119:A:<br>G   | 0.000899 |
| 62_c3-b | 62 | MET                         | HIGH               | c.1619G>A                                                                                     | p.Trp540*                                                     | 1 | FALSE | chr7:1163<br>80997:G:A      | 69:chr7:11<br>6380997:G<br>:A  | 0.000736 |
| 62_c3-b | 62 | NF1                         | MODERATE           | c.1681T>C                                                                                     | p.Trp561Arg                                                   | 1 | FALSE | chr17:295<br>48907:T:C      | 69:chr17:2<br>9548907:T<br>:C  | 0.000505 |
| 62_c3-b | 62 | DDR2                        | MODERATE           | c.257T>C                                                                                      | p.Phe86Ser                                                    | 1 | FALSE | chr1:1627<br>24485:T:C      | 69:chr1:16<br>2724485:T<br>:C  | 0.000425 |
| 62_c3-b | 62 | PIK3CA                      | MODERATE           | c.1093G>A                                                                                     | p.Glu365Lys                                                   | 6 | FALSE | chr3:1789<br>22324:G:A      | 69:chr3:17<br>8922324:G<br>:A  | 0.000467 |

|         |    |                    |                            |                                                                 |                                                     |   |       |                             |                                |          |
|---------|----|--------------------|----------------------------|-----------------------------------------------------------------|-----------------------------------------------------|---|-------|-----------------------------|--------------------------------|----------|
| 62_c3-b | 62 | HGF                | MODERATE                   | c.2157G>T;<br>; c.2172G>T                                       | p.Lys719Asn<br>;<br>p.Lys724Asn                     | 0 | FALSE | chr7:8133<br>1912:C:A       | 69:chr7:81<br>331912:C:<br>A   | 0.000629 |
| 62_c3-b | 62 | NF1                | MODERATE                   | c.8070G>T<br>;<br>; c.8133G>T                                   | p.Leu2690P<br>he;<br>p.Leu2711P<br>he               | 1 | FALSE | chr17:296<br>86006:G:T      | 69:chr17:2<br>9686006:G<br>:T  | 0.006913 |
| 62_c3-b | 62 | PTEN               | MODERATE                   | c.392C>A                                                        | p.Thr131Asn                                         | 2 | FALSE | chr10:896<br>92908:C:A      | 69:chr10:8<br>9692908:C<br>:A  | 0.001004 |
| 62_c3-b | 62 | VHL                | MODIFIER; MODERATE         | c.341-<br>3184G>A;<br>; c.430G>A                                | p.Gly144Arg                                         | 0 | FALSE | chr3:1018<br>8287:G:A       | 69:chr3:10<br>188287:G:<br>A   | 0.000586 |
| 62_c3-b | 62 | NOTCH1             | MODERATE                   | c.5033T>A                                                       | p.Leu1678Gl<br>n                                    | 0 | FALSE | chr9:1393<br>97768:A:T      | 69:chr9:13<br>9397768:A<br>:T  | 0.000982 |
| 62_c3-b | 62 | EPHA3              | MODERATE                   | c.2734A>G                                                       | p.Thr912Ala                                         | 0 | FALSE | chr3:8952<br>1657:A:G       | 69:chr3:89<br>521657:A:<br>G   | 0.000484 |
| 62_c3-b | 62 | ATM                | MODERATE                   | c.1634C>A                                                       | p.Ala545Glu                                         | 0 | FALSE | chr11:108<br>122590:C:<br>A | 69:chr11:1<br>08122590:<br>C:A | 0.000456 |
| 62_c3-b | 62 | PTEN               | MODERATE                   | c.443C>A                                                        | p.Ala148Glu                                         | 1 | FALSE | chr10:896<br>92959:C:A      | 69:chr10:8<br>9692959:C<br>:A  | 0.001923 |
| 62_c3-b | 62 | APC                | MODERATE                   | c.1771G>A<br>;<br>; c.1825G>A                                   | p.Val591Ile;<br>p.Val609Ile                         | 0 | FALSE | chr5:1121<br>70729:G:A      | 69:chr5:11<br>2170729:G<br>:A  | 0.000822 |
| 62_c3-b | 62 | PTEN               | MODERATE                   | c.361G>A                                                        | p.Ala121Thr                                         | 3 | FALSE | chr10:896<br>92877:G:A      | 69:chr10:8<br>9692877:G<br>:A  | 0.00077  |
| 62_c3-b | 62 | C9orf53;<br>CDKN2A | MODIFIER; MODERATE;<br>LOW | n.*616T>G<br>;<br>; c.*120A>C<br>;<br>; c.197A>C;<br>; c.240A>C | p.His66Pro;<br>p.Pro80Pro                           | 1 | FALSE | chr9:2197<br>1161:T:G       | 69:chr9:21<br>971161:T:<br>G   | 0.025143 |
| 62_c3-b | 62 | GNA11              | MODERATE                   | c.440G>A                                                        | p.Arg147His                                         | 1 | FALSE | chr19:311<br>3446:G:A       | 69:chr19:3<br>113446:G:<br>A   | 0.000962 |
| 62_c3-b | 62 | NRAS               | MODERATE                   | c.490C>T                                                        | p.Arg164Cys                                         | 1 | FALSE | chr1:1152<br>51236:G:A      | 69:chr1:11<br>5251236:G<br>:A  | 0.000408 |
| 62_c3-b | 62 | CTNNB1             | MODERATE                   | c.1346G>A                                                       | p.Arg449His                                         | 0 | FALSE | chr3:4127<br>5180:G:A       | 69:chr3:41<br>275180:G:<br>A   | 0.00086  |
| 62_c3-b | 62 | BRAF               | MODERATE                   | c.1813A>G                                                       | p.Ser605Gly                                         | 4 | FALSE | chr7:1404<br>53122:T:C      | 69:chr7:14<br>0453122:T<br>:C  | 0.000468 |
| 62_c3-b | 62 | NTRK1              | MODERATE                   | c.1768C>A<br>;<br>; c.1858C>A<br>;<br>; c.1876C>A               | p.Gln590Lys<br>;<br>p.Gln620Lys<br>;<br>p.Gln626Lys | 1 | FALSE | chr1:1568<br>48984:C:A      | 69:chr1:15<br>6848984:C<br>:A  | 0.000529 |

|         |    |                   |                    |                                                                 |                                                                         |     |       |                             |                                |          |
|---------|----|-------------------|--------------------|-----------------------------------------------------------------|-------------------------------------------------------------------------|-----|-------|-----------------------------|--------------------------------|----------|
| 62_c3-b | 62 | PIK3R1            | MODERATE           | c.1540C>T;<br>c.451C>T;<br>c.640C>T;<br>c.730C>T                | p.Arg514Cys<br>;<br>p.Arg151Cys<br>;<br>p.Arg214Cys<br>;<br>p.Arg244Cys | 2   | FALSE | chr5:6759<br>0478:C:T       | 69:chr5:67<br>590478:C:<br>T   | 0.000525 |
| 62_c3-b | 62 | PIK3R1            | MODERATE           | c.1082G>A<br>;<br>c.1271G>A<br>;<br>c.1361G>A<br>;<br>c.2171G>A | p.Arg361Gln<br>;<br>p.Arg424Gln<br>;<br>p.Arg454Gln<br>;<br>p.Arg724Gln | 1   | FALSE | chr5:6759<br>3425:G:A       | 69:chr5:67<br>593425:G:<br>A   | 0.000344 |
| 62_c3-b | 62 | NF1               | MODERATE           | c.2617C>T                                                       | p.Arg873Cys                                                             | 1   | FALSE | chr17:295<br>56250:C:T      | 69:chr17:2<br>9556250:C<br>:T  | 0.000389 |
| 62_c3-b | 62 | EPHA3             | MODERATE           | c.2821G>A                                                       | p.Asp941As<br>n                                                         | 0   | FALSE | chr3:8952<br>1744:G:A       | 69:chr3:89<br>521744:G:<br>A   | 0.000508 |
| 62_c3-b | 62 | ESR1              | HIGH               | c.469C>T                                                        | p.Arg157*                                                               | 0   | FALSE | chr6:1521<br>63748:C:T      | 69:chr6:15<br>2163748:C<br>:T  | 0.000596 |
| 62_c3-b | 62 | ATM               | MODERATE           | c.412G>A                                                        | p.Gly138Arg                                                             | 0   | FALSE | chr11:108<br>106477:G:<br>A | 69:chr11:1<br>08106477:<br>G:A | 0.000776 |
| 62_c3-b | 62 | TP53              | MODERATE           | c.131G>A;<br>c.410G>A;<br>c.50G>A;<br>c.527G>A                  | p.Cys44Tyr;<br>p.Cys137Tyr<br>;<br>p.Cys17Tyr;<br>p.Cys176Tyr           | 143 | FALSE | chr17:757<br>8403:C:T       | 69:chr17:7<br>578403:C:<br>T   | 0.000629 |
| 62_c3-b | 62 | KDR               | MODERATE           | c.2497C>T                                                       | p.Arg833Trp                                                             | 1   | FALSE | chr4:5596<br>4316:G:A       | 69:chr4:55<br>964316:G:<br>A   | 0.000472 |
| 62_c3-b | 62 | TSC1              | MODERATE           | c.365C>T;<br>c.518C>T                                           | p.Ala122Val;<br>p.Ala173Val                                             | 0   | FALSE | chr9:1357<br>97351:G:A      | 69:chr9:13<br>5797351:G<br>:A  | 0.001037 |
| 62_c3-b | 62 | IGF1R             | MODERATE           | c.2824G>A<br>;<br>c.2827G>A                                     | p.Ala942Thr<br>;<br>p.Ala943Thr                                         | 0   | FALSE | chr15:994<br>72831:G:A      | 69:chr15:9<br>9472831:G<br>:A  | 0.000422 |
| 62_c3-b | 62 | EGFR;<br>EGFR-AS1 | MODERATE; MODIFIER | c.2568T>G<br>; n.-1A>C                                          | p.Phe856Le<br>u;                                                        | 1   | FALSE | chr7:5525<br>9510:T:G       | 69:chr7:55<br>259510:T:<br>G   | 0.001438 |
| 62_c3-b | 62 | KIT               | MODERATE           | c.1486G>A                                                       | p.Asp496As<br>n                                                         | 1   | FALSE | chr4:5559<br>2162:G:A       | 69:chr4:55<br>592162:G:<br>A   | 0.00061  |
| 62_c3-b | 62 | TSC2              | MODERATE           | c.673G>A                                                        | p.Val225Me<br>t                                                         | 0   | FALSE | chr16:210<br>6669:G:A       | 69:chr16:2<br>106669:G:<br>A   | 0.000578 |
| 62_c3-b | 62 | EGFR;<br>EGFR-AS1 | MODERATE; MODIFIER | c.2576C>A<br>; n.-1G>T                                          | p.Ala859Asp<br>;                                                        | 1   | FALSE | chr7:5525<br>9518:C:A       | 69:chr7:55<br>259518:C:<br>A   | 0.000599 |

|         |    |        |                    |                                                                                               |                                                                         |    |       |                        |                               |          |
|---------|----|--------|--------------------|-----------------------------------------------------------------------------------------------|-------------------------------------------------------------------------|----|-------|------------------------|-------------------------------|----------|
| 70_c4-b | 70 | FBXW7  | MODERATE           | c.232A>T;<br>c.346A>T;<br>c.586A>T                                                            | p.Thr78Ser;<br>p.Thr116Ser<br>;<br>p.Thr196Ser                          | 0  | FALSE | chr4:1532<br>68222:T:A | 70:chr4:15<br>3268222:T<br>:A | 0.013396 |
| 70_c4-b | 70 | NTRK1  | MODERATE           | c.1940T>G<br>;<br>c.2030T>G<br>;<br>c.2048T>G                                                 | p.Val647Gly;<br>p.Val677Gly;<br>p.Val683Gly                             | 2  | FALSE | chr1:1568<br>49792:T:G | 70:chr1:15<br>6849792:T<br>:G | 0.01291  |
| 70_c4-b | 70 | PIK3CA | MODERATE           | c.1255C>A                                                                                     | p.His419Asn                                                             | 1  | FALSE | chr3:1789<br>27977:C:A | 70:chr3:17<br>8927977:C<br>:A | 0.002215 |
| 70_c4-b | 70 | ROS1   | MODERATE           | c.5651G>A                                                                                     | p.Arg1884Lys                                                            | 1  | FALSE | chr6:1176<br>42548:C:T | 70:chr6:11<br>7642548:C<br>:T | 0.001304 |
| 70_c4-b | 70 | KIT    | MODERATE           | c.2398C>T;<br>c.2410C>T                                                                       | p.Arg800Trp<br>;<br>p.Arg804Trp                                         | 4  | FALSE | chr4:5559<br>9284:C:T  | 70:chr4:55<br>599284:C:<br>T  | 0.001926 |
| 70_c4-b | 70 | CTNNB1 | MODERATE           | c.1564G>A                                                                                     | p.Ala522Thr                                                             | 0  | FALSE | chr3:4127<br>5669:G:A  | 70:chr3:41<br>275669:G:<br>A  | 0.001207 |
| 70_c4-b | 70 | NOTCH1 | MODERATE           | c.3374C>T                                                                                     | p.Ala1125Val                                                            | 0  | FALSE | chr9:1394<br>02543:G:A | 70:chr9:13<br>9402543:G<br>:A | 0.002639 |
| 70_c4-b | 70 | TP53   | MODIFIER; MODERATE | c.-3G>T;<br>c.358G>T;<br>c.475G>T;<br>c.79G>T                                                 | p.Ala120Ser;<br>p.Ala159Ser;<br>p.Ala27Ser                              | 23 | FALSE | chr17:757<br>8455:C:A  | 70:chr17:7<br>578455:C:<br>A  | 0.001339 |
| 70_c4-b | 70 | NF1    | HIGH               | c.1007G>A                                                                                     | p.Trp336*                                                               | 1  | FALSE | chr17:295<br>27558:G:A | 70:chr17:2<br>9527558:G<br>:A | 0.001174 |
| 70_c4-b | 70 | IGF1R  | MODERATE           | c.3905T>C;<br>c.3908T>C                                                                       | p.Val1302Ala;<br>p.Val1303Ala                                           | 0  | FALSE | chr15:995<br>00475:T:C | 70:chr15:9<br>9500475:T<br>:C | 0.002436 |
| 70_c4-b | 70 | IGF1R  | MODERATE           | c.3934T>C;<br>c.3937T>C                                                                       | p.Ser1312Pro;<br>p.Ser1313Pro                                           | 0  | FALSE | chr15:995<br>00504:T:C | 70:chr15:9<br>9500504:T<br>:C | 0.018076 |
| 70_c4-b | 70 | TP53   | MODIFIER; MODERATE | c.*137A>G<br>;<br>c.*225A>G<br>;<br>c.1001A>G<br>;<br>c.1118A>G<br>;<br>c.641A>G;<br>c.722A>G | p.Lys334Arg<br>;<br>p.Lys373Arg<br>;<br>p.Lys214Arg<br>;<br>p.Lys241Arg | 1  | FALSE | chr17:757<br>2991:T:C  | 70:chr17:7<br>572991:T:<br>C  | 0.0016   |

|         |    |                             |                            |                                                                                                |                                                             |    |       |                             |                                |          |
|---------|----|-----------------------------|----------------------------|------------------------------------------------------------------------------------------------|-------------------------------------------------------------|----|-------|-----------------------------|--------------------------------|----------|
| 70_c4-b | 70 | CDKN2B;<br>CDKN2B-<br>AS1   | MODIFIER; MODERATE         | c.*253C>T;<br>c.367C>T;<br>n.371+108<br>76G>A                                                  | p.Arg123Trp                                                 | 0  | FALSE | chr9:2200<br>6036:G:A       | 70:chr9:22<br>006036:G:<br>A   | 0.001565 |
| 70_c4-b | 70 | SMO                         | MODERATE                   | c.1045A>C                                                                                      | p.Thr349Pro                                                 | 0  | FALSE | chr7:1288<br>46115:A:C      | 70:chr7:12<br>8846115:A<br>:C  | 0.009793 |
| 70_c4-b | 70 | GNA11                       | MODERATE                   | c.1052T>C                                                                                      | p.Leu351Pro                                                 | 1  | FALSE | chr19:312<br>1149:T:C       | 70:chr19:3<br>121149:T:<br>C   | 0.001961 |
| 70_c4-b | 70 | NTRK1                       | MODERATE                   | c.1853G>A<br>;<br>c.1943G>A<br>;<br>c.1961G>A                                                  | p.Arg618His<br>;<br>p.Arg648His<br>;<br>p.Arg654His         | 3  | FALSE | chr1:1568<br>49069:G:A      | 70:chr1:15<br>6849069:G<br>:A  | 0.001343 |
| 70_c4-b | 70 | PTEN                        | MODERATE                   | c.518G>A                                                                                       | p.Arg173His                                                 | 27 | FALSE | chr10:897<br>11900:G:A      | 70:chr10:8<br>9711900:G<br>:A  | 0.001289 |
| 70_c4-b | 70 | PTEN                        | MODERATE                   | c.443C>A                                                                                       | p.Ala148Glu                                                 | 1  | FALSE | chr10:896<br>92959:C:A      | 70:chr10:8<br>9692959:C<br>:A  | 0.001438 |
| 70_c4-b | 70 | ERBB2;<br>MIEN1;<br>MIR4728 | MODERATE; MODIFIER         | c.3025G>A<br>;<br>c.3070G>A<br>;<br>c.3115G>A<br>;<br>n.3439G>A<br>;<br>c.*388C>T;<br>n.*67G>A | p.Ala1009Th<br>r;<br>p.Ala1024Th<br>r;<br>p.Ala1039Th<br>r; | 2  | FALSE | chr17:378<br>83212:G:A      | 70:chr17:3<br>7883212:G<br>:A  | 0.003208 |
| 70_c4-b | 70 | C9orf53;<br>CDKN2A          | MODIFIER; MODERATE;<br>LOW | n.*616T>G<br>;<br>c.*120A>C<br>;<br>c.197A>C;<br>c.240A>C                                      | p.His66Pro;<br>p.Pro80Pro                                   | 1  | FALSE | chr9:2197<br>1161:T:G       | 70:chr9:21<br>971161:T:<br>G   | 0.018773 |
| 70_c4-b | 70 | NOTCH1                      | MODERATE                   | c.4984C>T                                                                                      | p.Arg1662Tr<br>p                                            | 0  | FALSE | chr9:1393<br>99159:G:A      | 70:chr9:13<br>9399159:G<br>:A  | 0.002973 |
| 70_c4-b | 70 | APC                         | MODERATE                   | c.1733C>T;<br>c.1787C>T                                                                        | p.Ser578Leu<br>;<br>p.Ser596Leu                             | 0  | FALSE | chr5:1121<br>70691:C:T      | 70:chr5:11<br>2170691:C<br>:T  | 0.001178 |
| 70_c4-b | 70 | NF1                         | MODERATE                   | c.8070G>T<br>;<br>c.8133G>T                                                                    | p.Leu2690P<br>he;<br>p.Leu2711P<br>he                       | 1  | FALSE | chr17:296<br>86006:G:T      | 70:chr17:2<br>9686006:G<br>:T  | 0.011964 |
| 70_c4-b | 70 | ATM                         | MODERATE                   | c.6280G>A                                                                                      | p.Glu2094Ly<br>s                                            | 0  | FALSE | chr11:108<br>188181:G:<br>A | 70:chr11:1<br>08188181:<br>G:A | 0.001009 |
| 70_c4-b | 70 | ATM                         | MODERATE                   | c.5639C>G                                                                                      | p.Thr1880Ar<br>g                                            | 0  | FALSE | chr11:108<br>175544:C:<br>G | 70:chr11:1<br>08175544:<br>C:G | 0.005829 |

|         |    |                            |                    |                                                                                                                      |                                                       |   |       |                        |                               |          |
|---------|----|----------------------------|--------------------|----------------------------------------------------------------------------------------------------------------------|-------------------------------------------------------|---|-------|------------------------|-------------------------------|----------|
| 70_c4-b | 70 | GAPDH;<br>IFFO1;<br>NCAPD2 | MODERATE; MODIFIER | c.148G>A;<br>c.274G>A;<br>c.*1743C><br>T;<br>c.*1746C><br>T;<br>c.*1770C><br>T;<br>n.*2798C><br>T;<br>c.*4252G><br>A | p.Ala50Thr;<br>p.Ala92Thr;                            | 0 | FALSE | chr12:664<br>6123:G:A  | 70:chr12:6<br>646123:G:<br>A  | 0.001466 |
| 70_c4-b | 70 | RET                        | MODERATE           | c.1690A>C                                                                                                            | p.Thr564Pro                                           | 1 | FALSE | chr10:436<br>08342:A:C | 70:chr10:4<br>3608342:A<br>:C | 0.012326 |
| 70_c4-b | 70 | RET                        | MODERATE           | c.1907C>T                                                                                                            | p.Thr636Met                                           | 1 | FALSE | chr10:436<br>09955:C:T | 70:chr10:4<br>3609955:C<br>:T | 0.00092  |
| 70_c4-b | 70 | NF1                        | MODERATE           | c.2695T>G                                                                                                            | p.Leu899Val                                           | 3 | FALSE | chr17:295<br>56328:T:G | 70:chr17:2<br>9556328:T<br>:G | 0.012698 |
| 70_c4-b | 70 | FGFR3                      | MODERATE           | c.599G>A                                                                                                             | p.Arg200His                                           | 1 | FALSE | chr4:1803<br>247:G:A   | 70:chr4:18<br>03247:G:A       | 0.001778 |
| 70_c4-b | 70 | NTRK2                      | MODERATE           | c.2017G>A;<br>;<br>c.2065G>A                                                                                         | p.Val673Met;<br>p.Val689Met                           | 0 | FALSE | chr9:8757<br>0325:G:A  | 70:chr9:87<br>570325:G:<br>A  | 0.00119  |
| 70_c4-b | 70 | KDR                        | MODERATE           | c.2323G>T                                                                                                            | p.Ala775Ser                                           | 1 | FALSE | chr4:5596<br>4914:C:A  | 70:chr4:55<br>964914:C:<br>A  | 0.002884 |
| 70_c4-b | 70 | NTRK3                      | HIGH               | c.1348C>T;<br>c.1372C>T                                                                                              | p.Arg450*;<br>p.Arg458*                               | 0 | FALSE | chr15:886<br>69526:G:A | 70:chr15:8<br>8669526:G<br>:A | 0.001086 |
| 70_c4-b | 70 | STK11                      | MODERATE           | c.622G>A                                                                                                             | p.Asp208Asn                                           | 1 | FALSE | chr19:122<br>0604:G:A  | 70:chr19:1<br>220604:G:<br>A  | 0.002114 |
| 70_c4-b | 70 | FBXW7                      | MODERATE           | c.182G>A;<br>c.296G>A;<br>c.536G>A                                                                                   | p.Arg61His;<br>p.Arg99His;<br>p.Arg179His             | 0 | FALSE | chr4:1532<br>71242:C:T | 70:chr4:15<br>3271242:C<br>:T | 0.0013   |
| 70_c4-b | 70 | NTRK1                      | MODERATE           | c.1768C>A;<br>;<br>c.1858C>A;<br>;<br>c.1876C>A                                                                      | p.Gln590Lys;<br>;<br>p.Gln620Lys;<br>;<br>p.Gln626Lys | 1 | FALSE | chr1:1568<br>48984:C:A | 70:chr1:15<br>6848984:C<br>:A | 0.001178 |
| 70_c4-b | 70 | NOTCH1                     | MODERATE           | c.6088T>C                                                                                                            | p.Ser2030Pro                                          | 0 | FALSE | chr9:1393<br>93443:A:G | 70:chr9:13<br>9393443:A<br>:G | 0.001431 |



|         |    |                    |                    |                                                                                   |                                                                         |       |       |                        |                               |          |
|---------|----|--------------------|--------------------|-----------------------------------------------------------------------------------|-------------------------------------------------------------------------|-------|-------|------------------------|-------------------------------|----------|
| 70_c4-b | 70 | TP53               | MODIFIER; MODERATE | c.*117G>T;<br>; c.*29G>T;<br>c.1010G>T<br>;<br>c.533G>T;<br>c.614G>T;<br>c.893G>T | p.Arg337Leu<br>;<br>p.Arg178Leu<br>;<br>p.Arg205Leu<br>;<br>p.Arg298Leu | 21    | FALSE | chr17:757<br>4017:C:A  | 70:chr17:7<br>574017:C:<br>A  | 0.006176 |
| 70_c4-b | 70 | MAP2K2             | MODERATE           | c.196G>A                                                                          | p.Glu66Lys                                                              | 0     | FALSE | chr19:411<br>7524:C:T  | 70:chr19:4<br>117524:C:<br>T  | 0.001491 |
| 70_c4-b | 70 | C9orf53;<br>CDKN2A | MODIFIER; MODERATE | n.*616C>G<br>;<br>c.*140G>C<br>;<br>c.217G>C;<br>c.260G>C                         | p.Ala73Pro;<br>p.Arg87Pro                                               | 1     | FALSE | chr9:2197<br>1141:C:G  | 70:chr9:21<br>971141:C:<br>G  | 0.015278 |
| 70_c4-b | 70 | DDR2               | MODERATE           | c.1135A>C                                                                         | p.Thr379Pro                                                             | 1     | FALSE | chr1:1627<br>35826:A:C | 70:chr1:16<br>2735826:A:<br>C | 0.001565 |
| 70_c4-b | 70 | CTNNB1             | MODERATE           | c.122C>A                                                                          | p.Thr41Asn                                                              | 0     | FALSE | chr3:4126<br>6125:C:A  | 70:chr3:41<br>266125:C:<br>A  | 0.001085 |
| 83_bl-b | 83 | CTNNB1             | MODERATE           | c.861C>A                                                                          | p.Asn287Lys                                                             | 0     | FALSE | chr3:4126<br>7277:C:A  | 71:chr3:41<br>267277:C:<br>A  | 0.001309 |
| 83_bl-b | 83 | EPHA3              | MODERATE           | c.1234G>A                                                                         | p.Val412Ile                                                             | 0     | FALSE | chr3:8939<br>1168:G:A  | 71:chr3:89<br>391168:G:<br>A  | 0.001283 |
| 83_bl-b | 83 | STK11              | MODERATE           | c.941C>A                                                                          | p.Pro314His                                                             | 2     | FALSE | chr19:122<br>3004:C:A  | 71:chr19:1<br>223004:C:<br>A  | 0.001718 |
| 83_bl-b | 83 | MAP2K1             | MODERATE           | c.379G>A                                                                          | p.Val127Met                                                             | 1     | FALSE | chr15:667<br>29171:G:A | 71:chr15:6<br>6729171:G:<br>A | 0.001864 |
| 83_bl-b | 83 | CDH1               | MODERATE           | c.1223C>A                                                                         | p.Ala408Glu                                                             | 0     | FALSE | chr16:688<br>47301:C:A | 71:chr16:6<br>8847301:C:<br>A | 0.001119 |
| 83_bl-b | 83 | HGF                | MODERATE           | c.1678C>T;<br>c.1693C>T                                                           | p.Leu560Phe;<br>p.Leu565Phe                                             | 0     | FALSE | chr7:8133<br>5667:G:A  | 71:chr7:81<br>335667:G:<br>A  | 0.001205 |
| 83_bl-b | 83 | NTRK1              | MODERATE           | c.1039C>T;<br>c.949C>T                                                            | p.Arg347Cys<br>;<br>p.Arg317Cys                                         | 1     | FALSE | chr1:1568<br>43613:C:T | 71:chr1:15<br>6843613:C:<br>T | 0.001883 |
| 83_bl-b | 83 | EGFR               | MODERATE           | c.442G>A                                                                          | p.Val148Met                                                             | 1     | FALSE | chr7:5521<br>4316:G:A  | 71:chr7:55<br>214316:G:<br>A  | 0.001453 |
| 83_bl-b | 83 | KRAS               | MODERATE           | c.35G>A                                                                           | p.Gly12Asp                                                              | 11213 | FALSE | chr12:253<br>98284:C:T | 71:chr12:2<br>5398284:C:<br>T | 0.002646 |
| 83_bl-b | 83 | IGF1R              | MODERATE           | c.2380C>T                                                                         | p.Arg794Trp                                                             | 0     | FALSE | chr15:994<br>65555:C:T | 71:chr15:9<br>9465555:C:<br>T | 0.001193 |

|         |    |       |                    |                                                 |                                                                         |     |       |                        |                                |          |
|---------|----|-------|--------------------|-------------------------------------------------|-------------------------------------------------------------------------|-----|-------|------------------------|--------------------------------|----------|
| 83_bl-b | 83 | FBXW7 | MODERATE           | c.232A>T;<br>c.346A>T;<br>c.586A>T              | p.Thr78Ser;<br>p.Thr116Ser<br>;<br>p.Thr196Ser                          | 0   | FALSE | chr4:1532<br>68222:T:A | 71:chr4:15<br>3268222:T<br>:A  | 0.004085 |
| 83_bl-b | 83 | FBXW7 | MODERATE           | c.1082G>A<br>;<br>c.1196G>A<br>;<br>c.1436G>A   | p.Arg361Gln<br>;<br>p.Arg399Gln<br>;<br>p.Arg479Gln                     | 0   | FALSE | chr4:1532<br>47366:C:T | 71:chr4:15<br>3247366:C<br>:T  | 0.001224 |
| 83_bl-b | 83 | KDR   | MODERATE           | c.2323G>T                                       | p.Ala775Ser                                                             | 1   | FALSE | chr4:5596<br>4914:C:A  | 71:chr4:55<br>964914:C:<br>A   | 0.001824 |
| 83_bl-b | 83 | TP53  | MODERATE           | c.236G>A;<br>c.317G>A;<br>c.596G>A;<br>c.713G>A | p.Cys79Tyr;<br>p.Cys106Tyr<br>;<br>p.Cys199Tyr<br>;<br>p.Cys238Tyr      | 74  | FALSE | chr17:757<br>7568:C:T  | 71:chr17:7<br>577568:C:<br>T   | 0.003446 |
| 83_bl-b | 83 | NF1   | MODERATE           | c.2695T>G                                       | p.Leu899Val                                                             | 3   | FALSE | chr17:295<br>56328:T:G | 71:chr17:2<br>9556328:T<br>:G  | 0.008075 |
| 83_bl-b | 83 | TP53  | MODERATE           | c.364G>T;<br>c.445G>T;<br>c.724G>T;<br>c.841G>T | p.Asp122Tyr<br>;<br>p.Asp149Tyr<br>;<br>p.Asp242Tyr<br>;<br>p.Asp281Tyr | 28  | FALSE | chr17:757<br>7097:C:A  | 71:chr17:7<br>577097:C:<br>A   | 0.001376 |
| 83_bl-b | 83 | SMO   | MODERATE           | c.1045A>C                                       | p.Thr349Pro                                                             | 0   | FALSE | chr7:1288<br>46115:A:C | 71:chr7:12<br>8846115:A:<br>:C | 0.009726 |
| 83_bl-b | 83 | TP53  | MODIFIER; MODERATE | c.-3G>T;<br>c.358G>T;<br>c.475G>T;<br>c.79G>T   | p.Ala120Ser;<br>p.Ala159Ser;<br>p.Ala27Ser                              | 23  | FALSE | chr17:757<br>8455:C:A  | 71:chr17:7<br>578455:C:<br>A   | 0.001543 |
| 83_bl-b | 83 | TP53  | MODERATE           | c.341G>A;<br>c.422G>A;<br>c.701G>A;<br>c.818G>A | p.Arg114His<br>;<br>p.Arg141His<br>;<br>p.Arg234His<br>;<br>p.Arg273His | 647 | TRUE  | chr17:757<br>7120:C:T  | 71:chr17:7<br>577120:C:<br>T   | 0.001386 |
| 83_bl-b | 83 | IGF1R | MODERATE           | c.3934T>C;<br>c.3937T>C                         | p.Ser1312Pr<br>o;<br>p.Ser1313Pr<br>o                                   | 0   | FALSE | chr15:995<br>00504:T:C | 71:chr15:9<br>9500504:T<br>:C  | 0.007077 |
| 83_bl-b | 83 | APC   | MODERATE           | c.1771G>A<br>;<br>c.1825G>A                     | p.Val591Ile;<br>p.Val609Ile                                             | 0   | FALSE | chr5:1121<br>70729:G:A | 71:chr5:11<br>2170729:G<br>:A  | 0.484169 |

|         |    |        |          |                                       |                                             |   |       |                     |                        |          |
|---------|----|--------|----------|---------------------------------------|---------------------------------------------|---|-------|---------------------|------------------------|----------|
| 83_bl-b | 83 | IGF1R  | MODERATE | c.3905T>C;<br>c.3908T>C               | p.Val1302Ala;<br>p.Val1303Ala               | 0 | FALSE | chr15:99500475:T:C  | 71:chr15:99500475:T:C  | 0.002259 |
| 83_bl-b | 83 | NOTCH1 | MODERATE | c.5011G>A                             | p.Val1671Ile                                | 0 | FALSE | chr9:139399132:C:T  | 71:chr9:139399132:C:T  | 0.509142 |
| 83_bl-b | 83 | RET    | MODERATE | c.1690A>C                             | p.Thr564Pro                                 | 1 | FALSE | chr10:43608342:A:C  | 71:chr10:43608342:A:C  | 0.00836  |
| 83_bl-b | 83 | TSC1   | MODERATE | c.2677G>A;<br>c.2827G>A;<br>c.2830G>A | p.Ala893Thr;<br>p.Ala943Thr;<br>p.Ala944Thr | 0 | FALSE | chr9:135772716:C:T  | 71:chr9:135772716:C:T  | 0.001258 |
| 83_bl-b | 83 | PTEN   | MODERATE | c.443C>A                              | p.Ala148Glu                                 | 1 | FALSE | chr10:89692959:C:A  | 71:chr10:89692959:C:A  | 0.001553 |
| 83_bl-b | 83 | NF1    | MODERATE | c.3790G>A                             | p.Glu1264Lys                                | 1 | FALSE | chr17:29562710:G:A  | 71:chr17:29562710:G:A  | 0.001234 |
| 83_bl-b | 83 | ALK    | MODERATE | c.4409C>T                             | p.Ala1470Val                                | 1 | FALSE | chr2:29416544:G:A   | 71:chr2:29416544:G:A   | 0.00107  |
| 83_bl-b | 83 | KDR    | MODERATE | c.1405G>A                             | p.Glu469Lys                                 | 3 | FALSE | chr4:55973911:C:T   | 71:chr4:55973911:C:T   | 0.002907 |
| 83_bl-b | 83 | NTRK1  | MODERATE | c.1940T>G;<br>c.2030T>G;<br>c.2048T>G | p.Val647Gly;<br>p.Val677Gly;<br>p.Val683Gly | 2 | FALSE | chr1:156849792:T:G  | 71:chr1:156849792:T:G  | 0.016582 |
| 78_bl-b | 78 | DDR2   | MODERATE | c.1135A>C                             | p.Thr379Pro                                 | 1 | FALSE | chr1:162735826:A:C  | 76:chr1:162735826:A:C  | 0.001765 |
| 78_bl-b | 78 | KIT    | MODERATE | c.2197G>A;<br>c.2209G>A               | p.Asp733Asn;<br>p.Asp737Asn                 | 2 | FALSE | chr4:55597561:G:A   | 76:chr4:55597561:G:A   | 0.001071 |
| 78_bl-b | 78 | ATM    | HIGH     | c.4396C>T                             | p.Arg1466*                                  | 0 | FALSE | chr11:108160488:C:T | 76:chr11:108160488:C:T | 0.001258 |
| 78_bl-b | 78 | PTEN   | MODERATE | c.829A>T                              | p.Thr277Ser                                 | 1 | FALSE | chr10:89720678:A:T  | 76:chr10:89720678:A:T  | 0.007788 |
| 78_bl-b | 78 | NF1    | MODERATE | c.8070G>T;<br>c.8133G>T               | p.Leu2690Phe;<br>p.Leu2711Phe               | 1 | FALSE | chr17:29686006:G:T  | 76:chr17:29686006:G:T  | 0.0366   |
| 78_bl-b | 78 | KDR    | MODERATE | c.2497C>T                             | p.Arg833Trp                                 | 1 | FALSE | chr4:55964316:G:A   | 76:chr4:55964316:G:A   | 0.001315 |
| 78_bl-b | 78 | ATM    | MODERATE | c.8762C>T                             | p.Thr2921Met                                | 0 | FALSE | chr11:108224583:C:T | 76:chr11:108224583:C:T | 0.001828 |
| 78_bl-b | 78 | STK11  | MODERATE | c.628T>C                              | p.Cys210Arg                                 | 1 | FALSE | chr19:1220610:T:C   | 76:chr19:1220610:T:C   | 0.002137 |

|         |    |                |                    |                                                |                                                     |       |       |                        |                               |          |
|---------|----|----------------|--------------------|------------------------------------------------|-----------------------------------------------------|-------|-------|------------------------|-------------------------------|----------|
| 78_bl-b | 78 | KDR            | MODERATE           | c.2323G>T                                      | p.Ala775Ser                                         | 1     | FALSE | chr4:5596<br>4914:C:A  | 76:chr4:55<br>964914:C:<br>A  | 0.005521 |
| 78_bl-b | 78 | NTRK1          | MODERATE           | c.2028C>A<br>;<br>c.2118C>A<br>;<br>c.2136C>A  | p.Ser676Arg<br>;<br>p.Ser706Arg<br>;<br>p.Ser712Arg | 1     | FALSE | chr1:1568<br>49880:C:A | 76:chr1:15<br>6849880:C<br>:A | 0.002885 |
| 78_bl-b | 78 | SMO            | MODERATE           | c.1045A>C                                      | p.Thr349Pro                                         | 0     | FALSE | chr7:1288<br>46115:A:C | 76:chr7:12<br>8846115:A<br>:C | 0.021753 |
| 78_bl-b | 78 | BRAF           | MODERATE           | c.1799T>A                                      | p.Val600Glu                                         | 23024 | FALSE | chr7:1404<br>53136:A:T | 76:chr7:14<br>0453136:A<br>:T | 0.001814 |
| 78_bl-b | 78 | MAP2K1         | MODERATE           | c.198C>A                                       | p.Asp66Glu                                          | 4     | FALSE | chr15:667<br>27482:C:A | 76:chr15:6<br>6727482:C<br>:A | 0.00156  |
| 78_bl-b | 78 | CTNNB1         | MODERATE           | c.125C>A                                       | p.Thr42Lys                                          | 0     | FALSE | chr3:4126<br>6128:C:A  | 76:chr3:41<br>266128:C:<br>A  | 0.001248 |
| 78_bl-b | 78 | PTEN           | HIGH               | c.1038C>A                                      | p.Tyr346*                                           | 1     | FALSE | chr10:897<br>25055:C:A | 76:chr10:8<br>9725055:C<br>:A | 0.001808 |
| 78_bl-b | 78 | CTNNB1         | HIGH               | c.999C>A                                       | p.Tyr333*                                           | 0     | FALSE | chr3:4126<br>8761:C:A  | 76:chr3:41<br>268761:C:<br>A  | 0.001161 |
| 78_bl-b | 78 | IGF1R          | MODERATE           | c.3934T>C;<br>c.3937T>C                        | p.Ser1312Pro;<br>p.Ser1313Pro                       | 0     | FALSE | chr15:995<br>00504:T:C | 76:chr15:9<br>9500504:T<br>:C | 0.014015 |
| 78_bl-b | 78 | HGF            | MODERATE           | c.518G>A;<br>c.533G>A                          | p.Arg173Gln<br>;<br>p.Arg178Gln                     | 0     | FALSE | chr7:8138<br>1528:C:T  | 76:chr7:81<br>381528:C:<br>T  | 0.001246 |
| 78_bl-b | 78 | PIK3CA         | MODERATE           | c.1255C>A                                      | p.His419Asn                                         | 1     | FALSE | chr3:1789<br>27977:C:A | 76:chr3:17<br>8927977:C<br>:A | 0.002165 |
| 78_bl-b | 78 | DEAR;<br>FBXW7 | MODIFIER; MODERATE | n.-1A>G;<br>c.526T>C;<br>c.640T>C;<br>c.880T>C | p.Ser176Pro<br>;<br>p.Ser214Pro<br>;<br>p.Ser294Pro | 0     | FALSE | chr4:1532<br>53853:A:G | 76:chr4:15<br>3253853:A<br>:G | 0.001652 |
| 78_bl-b | 78 | PDGFRA         | MODERATE           | c.1516C>A                                      | p.Leu506Ile                                         | 2     | FALSE | chr4:5513<br>9855:C:A  | 76:chr4:55<br>139855:C:<br>A  | 0.002037 |
| 78_bl-b | 78 | NRAS           | MODERATE           | c.394G>A                                       | p.Glu132Lys                                         | 2     | FALSE | chr1:1152<br>52246:C:T | 76:chr1:11<br>5252246:C<br>:T | 0.001097 |
| 78_bl-b | 78 | PTEN           | MODERATE           | c.389G>A                                       | p.Arg130Gln                                         | 89    | FALSE | chr10:896<br>92905:G:A | 76:chr10:8<br>9692905:G<br>:A | 0.00122  |
| 78_bl-b | 78 | CWH43          | MODERATE           | c.209C>T;<br>c.290C>T                          | p.Ala70Val;<br>p.Ala97Val                           | 0     | FALSE | chr4:4899<br>3525:C:T  | 76:chr4:48<br>993525:C:<br>T  | 0.001229 |

|         |    |                                 |                            |                                                           |                                                     |   |       |                             |                                |          |
|---------|----|---------------------------------|----------------------------|-----------------------------------------------------------|-----------------------------------------------------|---|-------|-----------------------------|--------------------------------|----------|
| 78_bl-b | 78 | NTRK1                           | MODERATE                   | c.1940T>G<br>;<br>c.2030T>G<br>;<br>c.2048T>G             | p.Val647Gly;<br>p.Val677Gly;<br>p.Val683Gly         | 2 | FALSE | chr1:1568<br>49792:T;G      | 76:chr1:15<br>6849792:T<br>:G  | 0.02139  |
| 78_bl-b | 78 | APC                             | HIGH                       | c.1228G>T<br>;<br>c.1282G>T                               | p.Glu410*;<br>p.Glu428*                             | 0 | FALSE | chr5:1121<br>55011:G:T      | 76:chr5:11<br>2155011:G<br>:T  | 0.002766 |
| 78_bl-b | 78 | C9orf53;<br>CDKN2A              | MODIFIER; MODERATE;<br>LOW | n.*616T>G<br>;<br>c.*120A>C<br>;<br>c.197A>C;<br>c.240A>C | p.His66Pro;<br>p.Pro80Pro                           | 1 | FALSE | chr9:2197<br>1161:T;G       | 76:chr9:21<br>971161:T:<br>G   | 0.015385 |
| 78_bl-b | 78 | FGFR3                           | MODERATE                   | c.1543G>A<br>;<br>c.1879G>A<br>;<br>c.1885G>A             | p.Glu515Lys<br>;<br>p.Glu627Lys<br>;<br>p.Glu629Lys | 1 | FALSE | chr4:1807<br>820:G:A        | 76:chr4:18<br>07820:G:A        | 0.001732 |
| 78_bl-b | 78 | C9orf53;<br>CDKN2A              | MODIFIER; MODERATE         | n.*616C>G<br>;<br>c.*140G>C<br>;<br>c.217G>C;<br>c.260G>C | p.Ala73Pro;<br>p.Arg87Pro                           | 1 | FALSE | chr9:2197<br>1141:C;G       | 76:chr9:21<br>971141:C:<br>G   | 0.007321 |
| 78_bl-b | 78 | NTHL1;<br>TSC2                  | MODIFIER; MODERATE         | c.-20G>A;<br>c.175C>T                                     | p.Arg59Trp                                          | 0 | FALSE | chr16:210<br>0437:C:T       | 76:chr16:2<br>100437:C:<br>T   | 0.001399 |
| 78_bl-b | 78 | EGFR                            | MODERATE                   | c.442G>A                                                  | p.Val148Met                                         | 1 | FALSE | chr7:5521<br>4316:G:A       | 76:chr7:55<br>214316:G:<br>A   | 0.001459 |
| 78_bl-b | 78 | CDH1                            | MODERATE                   | c.2246G>A                                                 | p.Arg749Gln                                         | 0 | FALSE | chr16:688<br>62158:G:A      | 76:chr16:6<br>8862158:G<br>:A  | 0.001331 |
| 78_bl-b | 78 | CTNNB1                          | MODERATE                   | c.1972G>T                                                 | p.Val658Phe                                         | 0 | FALSE | chr3:4127<br>8096:G:T       | 76:chr3:41<br>278096:G:<br>T   | 0.00194  |
| 78_bl-b | 78 | AKT1                            | MODERATE                   | c.194C>T                                                  | p.Thr65Met                                          | 1 | FALSE | chr14:105<br>243089:G:<br>A | 76:chr14:1<br>05243089:<br>G:A | 0.001741 |
| 78_bl-b | 78 | FOXL2;<br>FOXL2NB;<br>LINC01391 | MODERATE; MODIFIER         | c.205G>A;<br>c.-132C>T;<br>n.-1G>A                        | p.Glu69Lys;                                         | 0 | FALSE | chr3:1386<br>65360:C:T      | 76:chr3:13<br>8665360:C<br>:T  | 0.001522 |
| 78_bl-b | 78 | APC                             | HIGH                       | c.1733C>A<br>;<br>c.1787C>A                               | p.Ser578*;<br>p.Ser596*                             | 0 | FALSE | chr5:1121<br>70691:C:A      | 76:chr5:11<br>2170691:C<br>:A  | 0.001277 |
| 78_bl-b | 78 | RET                             | MODERATE                   | c.1690A>C                                                 | p.Thr564Pro                                         | 1 | FALSE | chr10:436<br>08342:A:C      | 76:chr10:4<br>3608342:A<br>:C  | 0.010237 |
| 78_bl-b | 78 | NOTCH1                          | MODERATE                   | c.2282C>A                                                 | p.Pro761His                                         | 0 | FALSE | chr9:1394<br>07915:G:T      | 76:chr9:13<br>9407915:G<br>:T  | 0.00161  |

|         |    |        |                    |                                                  |                                                     |       |       |                     |                        |          |
|---------|----|--------|--------------------|--------------------------------------------------|-----------------------------------------------------|-------|-------|---------------------|------------------------|----------|
| 78_bl-b | 78 | PTEN   | MODERATE           | c.1007A>T                                        | p.Tyr336Phe                                         | 1     | FALSE | chr10:89720856:A:T  | 76:chr10:89720856:A:T  | 0.003593 |
| 78_bl-b | 78 | BRAF   | MODERATE           | c.812G>A                                         | p.Arg271His                                         | 1     | FALSE | chr7:140501260:C:T  | 76:chr7:140501260:C:T  | 0.002009 |
| 80_bl-b | 80 | EPHA3  | MODERATE           | c.2530C>T                                        | p.Pro844Ser                                         | 0     | FALSE | chr3:89499360:C:T   | 77:chr3:89499360:C:T   | 0.001862 |
| 80_bl-b | 80 | NF1    | MODERATE           | c.5458C>A;<br>c.5521C>A                          | p.Gln1820Lys;<br>p.Gln1841Lys                       | 3     | FALSE | chr17:29654769:C:A  | 77:chr17:29654769:C:A  | 0.00091  |
| 80_bl-b | 80 | IGF1R  | MODERATE           | c.3934T>C;<br>c.3937T>C                          | p.Ser1312Pro;<br>p.Ser1313Pro                       | 0     | FALSE | chr15:99500504:T:C  | 77:chr15:99500504:T:C  | 0.029893 |
| 80_bl-b | 80 | PIK3R1 | HIGH               | c.1714C>T;<br>c.625C>T;<br>c.814C>T;<br>c.904C>T | p.Gln572*;<br>p.Gln209*;<br>p.Gln272*;<br>p.Gln302* | 2     | FALSE | chr5:67591121:C:T   | 77:chr5:67591121:C:T   | 0.000912 |
| 80_bl-b | 80 | FGFR4  | MODIFIER; MODERATE | c.1098-65G>A;<br>c.1251+10G>A;<br>c.1067G>A      | p.Arg356His                                         | 1     | FALSE | chr5:176520342:G:A  | 77:chr5:176520342:G:A  | 0.000882 |
| 80_bl-b | 80 | ATM    | HIGH               | c.6311G>A                                        | p.Trp2104*                                          | 0     | FALSE | chr11:108188212:G:A | 77:chr11:108188212:G:A | 0.001047 |
| 80_bl-b | 80 | PTEN   | MODERATE           | c.284C>T                                         | p.Pro95Leu                                          | 5     | FALSE | chr10:89692800:C:T  | 77:chr10:89692800:C:T  | 0.001037 |
| 80_bl-b | 80 | BRAF   | MODERATE           | c.1799T>A                                        | p.Val600Glu                                         | 23024 | FALSE | chr7:140453136:A:T  | 77:chr7:140453136:A:T  | 0.089187 |
| 80_bl-b | 80 | ESR1   | MODERATE           | c.1297C>T;<br>c.1300C>T;<br>c.1306C>T            | p.Arg433Trp;<br>p.Arg434Trp;<br>p.Arg436Trp         | 0     | FALSE | chr6:152382190:C:T  | 77:chr6:152382190:C:T  | 0.000962 |
| 80_bl-b | 80 | IGF1R  | MODERATE           | c.3905T>C;<br>c.3908T>C                          | p.Val1302Ala;<br>p.Val1303Ala                       | 0     | FALSE | chr15:99500475:T:C  | 77:chr15:99500475:T:C  | 0.004785 |
| 80_bl-b | 80 | ALG10  | MODERATE           | c.217A>G                                         | p.Ile73Val                                          | 0     | FALSE | chr12:34176942:A:G  | 77:chr12:34176942:A:G  | 0.000846 |
| 80_bl-b | 80 | GNA11  | MODERATE           | c.805G>A                                         | p.Val269Ile                                         | 1     | FALSE | chr19:3119273:G:A   | 77:chr19:3119273:G:A   | 0.001005 |
| 80_bl-b | 80 | SMO    | MODERATE           | c.413G>A                                         | p.Arg138Gln                                         | 0     | FALSE | chr7:128843306:G:A  | 77:chr7:128843306:G:A  | 0.000996 |
| 80_bl-b | 80 | NF1    | MODERATE           | c.8070G>T;<br>c.8133G>T                          | p.Leu2690Phe;<br>p.Leu2711Phe                       | 1     | FALSE | chr17:29686006:G:T  | 77:chr17:29686006:G:T  | 0.035133 |

|         |    |                    |                    |                                                  |                                             |    |       |                             |                                |          |
|---------|----|--------------------|--------------------|--------------------------------------------------|---------------------------------------------|----|-------|-----------------------------|--------------------------------|----------|
| 80_bl-b | 80 | MIR4673;<br>NOTCH1 | MODIFIER; MODERATE | n.*59A>G;<br>c.890A>G                            | p.Asp297Gly                                 | 0  | FALSE | chr9:1394<br>13252:T:C      | 77:chr9:13<br>9413252:T<br>:C  | 0.002425 |
| 80_bl-b | 80 | FGFR3              | MODIFIER; MODERATE | c.931-<br>398C>A;<br>c.1172C>A<br>;<br>c.1178C>A | p.Ala391Glu<br>;<br>p.Ala393Glu             | 34 | FALSE | chr4:1806<br>153:C:A        | 77:chr4:18<br>06153:C:A        | 0.003524 |
| 80_bl-b | 80 | ATM                | HIGH               | c.5188C>T                                        | p.Arg1730*                                  | 0  | FALSE | chr11:108<br>172385:C:<br>T | 77:chr11:1<br>08172385:<br>C:T | 0.001374 |
| 80_bl-b | 80 | NTRK1              | MODERATE           | c.804C>G;<br>c.894C>G                            | p.His268Gln<br>;<br>p.His298Gln             | 1  | FALSE | chr1:1568<br>43468:C:G      | 77:chr1:15<br>6843468:C<br>:G  | 0.002113 |
| 80_bl-b | 80 | NF1                | MODERATE           | c.6500C>T;<br>c.6563C>T                          | p.Ser2167Ph<br>e;<br>p.Ser2188Ph<br>e       | 1  | FALSE | chr17:296<br>64521:C:T      | 77:chr17:2<br>9664521:C<br>:T  | 0.001012 |
| 80_bl-b | 80 | NTRK1              | MODERATE           | c.1940T>G<br>;<br>c.2030T>G<br>;<br>c.2048T>G    | p.Val647Gly;<br>p.Val677Gly;<br>p.Val683Gly | 2  | FALSE | chr1:1568<br>49792:T:G      | 77:chr1:15<br>6849792:T<br>:G  | 0.03006  |
| 80_bl-b | 80 | ALK                | MODERATE           | c.1049C>T                                        | p.Ser350Leu                                 | 1  | FALSE | chr2:2975<br>4886:G:A       | 77:chr2:29<br>754886:G:<br>A   | 0.001066 |
| 80_bl-b | 80 | MIR4673;<br>NOTCH1 | MODIFIER; MODERATE | n.*59C>T;<br>c.1510C>T                           | p.Arg504Cys                                 | 0  | FALSE | chr9:1394<br>11769:G:A      | 77:chr9:13<br>9411769:G<br>:A  | 0.001795 |
| 80_bl-b | 80 | ATM                | MODERATE           | c.8180T>C                                        | p.Val2727Al<br>a                            | 0  | FALSE | chr11:108<br>206600:T:<br>C | 77:chr11:1<br>08206600:<br>T:C | 0.000923 |
| 80_bl-b | 80 | PDGFRA             | MODERATE           | c.452G>A                                         | p.Arg151His                                 | 2  | FALSE | chr4:5512<br>9918:G:A       | 77:chr4:55<br>129918:G:<br>A   | 0.000999 |
| 80_bl-b | 80 | MET                | MODERATE           | c.487T>C                                         | p.Ser163Pro                                 | 1  | FALSE | chr7:1163<br>39625:T:C      | 77:chr7:11<br>6339625:T<br>:C  | 0.001569 |
| 80_bl-b | 80 | KDR                | MODERATE           | c.2323G>T                                        | p.Ala775Ser                                 | 1  | FALSE | chr4:5596<br>4914:C:A       | 77:chr4:55<br>964914:C:<br>A   | 0.003846 |
| 80_bl-b | 80 | PTEN               | MODERATE           | c.494G>A                                         | p.Gly165Glu                                 | 7  | FALSE | chr10:897<br>11876:G:A      | 77:chr10:8<br>9711876:G<br>:A  | 0.001363 |
| 80_bl-b | 80 | ATM                | MODERATE           | c.8762C>T                                        | p.Thr2921M<br>et                            | 0  | FALSE | chr11:108<br>224583:C:<br>T | 77:chr11:1<br>08224583:<br>C:T | 0.000947 |
| 80_bl-b | 80 | NF1                | MODERATE           | c.5425C>T;<br>c.5488C>T                          | p.Arg1809C<br>ys;<br>p.Arg1830C<br>ys       | 4  | FALSE | chr17:296<br>54736:C:T      | 77:chr17:2<br>9654736:C<br>:T  | 0.000849 |

|         |    |            |                    |                                                         |                                                                         |    |       |                        |                                |          |
|---------|----|------------|--------------------|---------------------------------------------------------|-------------------------------------------------------------------------|----|-------|------------------------|--------------------------------|----------|
| 80_bl-b | 80 | EV12A; NF1 | MODIFIER; MODERATE | c.-266C>T;<br>c.-338C>T;<br>c.4882G>A<br>;<br>c.4945G>A | p.Gly1628Arg;<br>p.Gly1649Arg                                           | 1  | FALSE | chr17:296<br>52947:G:A | 77:chr17:2<br>9652947:G<br>:A  | 0.000823 |
| 80_bl-b | 80 | TP53       | MODERATE           | c.119T>G;<br>c.38T>G;<br>c.398T>G;<br>c.515T>G          | p.Val40Gly;<br>p.Val13Gly;<br>p.Val133Gly;<br>p.Val172Gly               | 12 | FALSE | chr17:757<br>8415:A:C  | 77:chr17:7<br>578415:A:<br>C   | 0.001153 |
| 80_bl-b | 80 | KIT        | MODERATE           | c.1485C>A                                               | p.Asn495Lys                                                             | 1  | FALSE | chr4:5559<br>2161:C:A  | 77:chr4:55<br>592161:C:<br>A   | 0.000962 |
| 80_bl-b | 80 | FGFR4      | MODERATE           | c.976G>A                                                | p.Glu326Lys                                                             | 1  | FALSE | chr5:1765<br>19704:G:A | 77:chr5:17<br>6519704:G<br>:A  | 0.001033 |
| 80_bl-b | 80 | TP53       | MODIFIER; MODERATE | c.-17C>T;<br>c.101C>T;<br>c.-279C>T;<br>c.-360C>T       | p.Pro34Leu                                                              | 2  | FALSE | chr17:757<br>9586:G:A  | 77:chr17:7<br>579586:G:<br>A   | 0.001265 |
| 80_bl-b | 80 | TP53       | MODERATE           | c.304A>G;<br>c.385A>G;<br>c.664A>G;<br>c.781A>G         | p.Ser102Gly<br>;<br>p.Ser129Gly<br>;<br>p.Ser222Gly<br>;<br>p.Ser261Gly | 3  | FALSE | chr17:757<br>7500:T:C  | 77:chr17:7<br>577500:T:<br>C   | 0.001186 |
| 80_bl-b | 80 | PTEN       | MODERATE           | c.829A>T                                                | p.Thr277Ser                                                             | 1  | FALSE | chr10:897<br>20678:A:T | 77:chr10:8<br>9720678:A:<br>:T | 0.004454 |
| 80_bl-b | 80 | KIT        | MODERATE           | c.1460G>A                                               | p.Gly487Asp                                                             | 1  | FALSE | chr4:5559<br>2136:G:A  | 77:chr4:55<br>592136:G:<br>A   | 0.000915 |
| 80_bl-b | 80 | KDR        | MODERATE           | c.241G>A                                                | p.Asp81Asn                                                              | 2  | FALSE | chr4:5598<br>4888:C:T  | 77:chr4:55<br>984888:C:<br>T   | 0.001509 |
| 80_bl-b | 80 | TP53       | MODERATE; MODIFIER | c.211C>T;<br>c.328C>T;<br>c.-279C>T;<br>c.-360C>T       | p.Arg71Cys;<br>p.Arg110Cys<br>;                                         | 6  | FALSE | chr17:757<br>9359:G:A  | 77:chr17:7<br>579359:G:<br>A   | 0.017553 |
| 80_bl-b | 80 | NF1        | MODERATE           | c.2695T>G                                               | p.Leu899Val                                                             | 3  | FALSE | chr17:295<br>56328:T:G | 77:chr17:2<br>9556328:T<br>:G  | 0.006217 |
| 80_bl-b | 80 | ALK        | MODERATE           | c.562C>T                                                | p.Arg188Cys                                                             | 2  | FALSE | chr2:3014<br>2964:G:A  | 77:chr2:30<br>142964:G:<br>A   | 0.001277 |
| 80_bl-b | 80 | PTEN       | MODERATE           | c.392C>A                                                | p.Thr131Asn                                                             | 2  | FALSE | chr10:896<br>92908:C:A | 77:chr10:8<br>9692908:C<br>:A  | 0.001401 |



|         |    |                   |               |                                                                                 |                                                                                                                 |    |       |                        |                               |          |
|---------|----|-------------------|---------------|---------------------------------------------------------------------------------|-----------------------------------------------------------------------------------------------------------------|----|-------|------------------------|-------------------------------|----------|
| 80_bl-b | 80 | FGFR1             | MODERATE      | c.1060C>T;<br>c.1066C>T;<br>c.1303C>T;<br>c.1327C>T;<br>c.1333C>T;<br>c.1426C>T | p.Arg354Trp<br>;<br>p.Arg356Trp<br>;<br>p.Arg435Trp<br>;<br>p.Arg443Trp<br>;<br>p.Arg445Trp<br>;<br>p.Arg476Trp | 2  | FALSE | chr8:3827<br>5843:G:A  | 77:chr8:38<br>275843:G:<br>A  | 0.001176 |
| 80_bl-b | 80 | HGF               | MODERATE      | c.737C>T;<br>c.752C>T                                                           | p.Pro246Leu<br>;<br>p.Pro251Leu                                                                                 | 0  | FALSE | chr7:8137<br>2782:G:A  | 77:chr7:81<br>372782:G:<br>A  | 0.001108 |
| 80_bl-b | 80 | RET               | MODERATE      | c.1690A>C                                                                       | p.Thr564Pro                                                                                                     | 1  | FALSE | chr10:436<br>08342:A:C | 77:chr10:4<br>3608342:A<br>:C | 0.005363 |
| 80_bl-b | 80 | FBXW7             | MODERATE      | c.1078G>T<br>;<br>c.1318G>T<br>;<br>c.964G>T                                    | p.Asp360Tyr<br>;<br>p.Asp440Tyr<br>;<br>p.Asp322Tyr                                                             | 0  | FALSE | chr4:1532<br>49460:C:A | 77:chr4:15<br>3249460:C<br>:A | 0.001998 |
| 80_bl-b | 80 | CTNNB1            | MODERATE      | c.1972G>T                                                                       | p.Val658Phe                                                                                                     | 0  | FALSE | chr3:4127<br>8096:G:T  | 77:chr3:41<br>278096:G:<br>T  | 0.001931 |
| 80_bl-b | 80 | RET               | MODERATE      | c.1907C>T                                                                       | p.Thr636Met                                                                                                     | 1  | FALSE | chr10:436<br>09955:C:T | 77:chr10:4<br>3609955:C<br>:T | 0.000813 |
| 80_bl-b | 80 | FBXW7             | MODERATE      | c.1444G>T<br>;<br>c.1558G>T<br>;<br>c.1798G>T                                   | p.Asp482Tyr<br>;<br>p.Asp520Tyr<br>;<br>p.Asp600Tyr                                                             | 0  | FALSE | chr4:1532<br>45393:C:A | 77:chr4:15<br>3245393:C<br>:A | 0.000982 |
| 80_bl-b | 80 | MAP2K1            | MODERATE      | c.198C>A                                                                        | p.Asp66Glu                                                                                                      | 4  | FALSE | chr15:667<br>27482:C:A | 77:chr15:6<br>6727482:C<br>:A | 0.001863 |
| 80_bl-b | 80 | TP53              | MODERATE      | c.355C>T;<br>c.436C>T;<br>c.715C>T;<br>c.832C>T                                 | p.Pro119Ser<br>;<br>p.Pro146Ser<br>;<br>p.Pro239Ser<br>;<br>p.Pro278Ser                                         | 59 | FALSE | chr17:757<br>7106:G:A  | 77:chr17:7<br>577106:G:<br>A  | 0.050592 |
| 80_bl-b | 80 | EGFR;<br>EGFR-AS1 | LOW; MODIFIER | c.2284-<br>6C>T;<br>n.1284G>A                                                   |                                                                                                                 | 1  | FALSE | chr7:5524<br>8980:C:T  | 77:chr7:55<br>248980:C:<br>T  | 0.000828 |
| 80_bl-b | 80 | FLT3              | MODERATE      | c.2822C>T                                                                       | p.Ser941Leu                                                                                                     | 0  | FALSE | chr13:285<br>88626:G:A | 77:chr13:2<br>8588626:G<br>:A | 0.000845 |
| 80_bl-b | 80 | TSC2              | MODERATE      | c.1864C>T                                                                       | p.Arg622Trp                                                                                                     | 0  | FALSE | chr16:212<br>1535:C:T  | 77:chr16:2<br>121535:C:<br>T  | 0.00125  |
| 80_bl-b | 80 | NTRK2             | MODERATE      | c.1981G>A<br>;<br>c.2029G>A                                                     | p.Ala661Thr<br>;<br>p.Ala677Thr                                                                                 | 0  | FALSE | chr9:8757<br>0289:G:A  | 77:chr9:87<br>570289:G:<br>A  | 0.001011 |

|         |    |                                 |                            |                                                           |                                                     |    |       |                             |                                |          |
|---------|----|---------------------------------|----------------------------|-----------------------------------------------------------|-----------------------------------------------------|----|-------|-----------------------------|--------------------------------|----------|
| 80_bl-b | 80 | FOXL2;<br>FOXL2NB;<br>LINC01391 | MODERATE; MODIFIER         | c.282T>A;<br>c.-132A>T;<br>n.-1T>A                        | p.Asn94Lys;                                         | 0  | FALSE | chr3:1386<br>65283:A:T      | 77:chr3:13<br>8665283:A<br>:T  | 0.012156 |
| 82_bl-b | 82 | C9orf53;<br>CDKN2A              | MODIFIER; MODERATE;<br>LOW | n.*616T>G<br>;<br>c.*120A>C<br>;<br>c.197A>C;<br>c.240A>C | p.His66Pro;<br>p.Pro80Pro                           | 1  | FALSE | chr9:2197<br>1161:T:G       | 78:chr9:21<br>971161:T:<br>G   | 0.031847 |
| 82_bl-b | 82 | CTNNB1                          | MODERATE                   | c.1972G>T                                                 | p.Val658Phe                                         | 0  | FALSE | chr3:4127<br>8096:G:T       | 78:chr3:41<br>278096:G:<br>T   | 0.002745 |
| 82_bl-b | 82 | ATM                             | MODERATE                   | c.2075G>A                                                 | p.Arg692His                                         | 0  | FALSE | chr11:108<br>124717:G:<br>A | 78:chr11:1<br>08124717:<br>G:A | 0.000942 |
| 82_bl-b | 82 | EGFR                            | MODIFIER; MODERATE         | c.*1464C><br>A;<br>c.1476C>A                              | p.Ser492Arg<br>;<br>p.Arg2573His                    | 4  | FALSE | chr7:5522<br>8009:C:A       | 78:chr7:55<br>228009:C:<br>A   | 0.001368 |
| 82_bl-b | 82 | NF1                             | MODERATE                   | c.7718G>A<br>;<br>c.7781G>A                               | p.Arg2573His<br>;<br>p.Arg2594His                   | 3  | FALSE | chr17:296<br>84020:G:A      | 78:chr17:2<br>9684020:G<br>:A  | 0.001129 |
| 82_bl-b | 82 | KIT                             | MODERATE                   | c.273C>A                                                  | p.Asn91Lys                                          | 1  | FALSE | chr4:5556<br>1883:C:A       | 78:chr4:55<br>561883:C:<br>A   | 0.001006 |
| 82_bl-b | 82 | NOTCH1                          | MODERATE                   | c.4391G>T                                                 | p.Ser1464Ile                                        | 0  | FALSE | chr9:1393<br>99957:C:A      | 78:chr9:13<br>9399957:C<br>:A  | 0.0013   |
| 82_bl-b | 82 | PIK3CA                          | MODERATE                   | c.1357G>C                                                 | p.Glu453Gln                                         | 20 | FALSE | chr3:1789<br>28079:G:C      | 78:chr3:17<br>8928079:G<br>:C  | 0.024103 |
| 82_bl-b | 82 | KRAS                            | MODERATE                   | c.25G>T                                                   | p.Val9Phe                                           | 3  | FALSE | chr12:253<br>98294:C:A      | 78:chr12:2<br>5398294:C<br>:A  | 0.001183 |
| 82_bl-b | 82 | IGF1R                           | MODERATE                   | c.3934T>C;<br>c.3937T>C                                   | p.Ser1312Pro;<br>p.Ser1313Pro                       | 0  | FALSE | chr15:995<br>00504:T:C      | 78:chr15:9<br>9500504:T<br>:C  | 0.038274 |
| 82_bl-b | 82 | CWH43                           | MODERATE                   | c.1407C>A<br>;<br>c.1488C>A                               | p.Ser469Arg<br>;<br>p.Ser496Arg                     | 0  | FALSE | chr4:4903<br>2957:C:A       | 78:chr4:49<br>032957:C:<br>A   | 0.002813 |
| 82_bl-b | 82 | EPHA3                           | HIGH                       | c.1515C>A                                                 | p.Tyr505*                                           | 0  | FALSE | chr3:8944<br>8551:C:A       | 78:chr3:89<br>448551:C:<br>A   | 0.001877 |
| 82_bl-b | 82 | FBXW7                           | MODERATE                   | c.1186G>T<br>;<br>c.1300G>T<br>;<br>c.1540G>T             | p.Val396Phe<br>;<br>p.Val434Phe<br>;<br>p.Val514Phe | 0  | FALSE | chr4:1532<br>47262:C:A      | 78:chr4:15<br>3247262:C<br>:A  | 0.00153  |
| 82_bl-b | 82 | ALK                             | MODERATE                   | c.3700G>A                                                 | p.Ala1234Thr                                        | 1  | FALSE | chr2:2943<br>6893:C:T       | 78:chr2:29<br>436893:C:<br>T   | 0.001384 |
| 82_bl-b | 82 | CDH1                            | MODERATE                   | c.184G>A                                                  | p.Gly62Ser                                          | 0  | FALSE | chr16:688<br>35593:G:A      | 78:chr16:6<br>8835593:G<br>:A  | 0.001062 |

|         |    |                    |                    |                                                       |                                                         |    |       |                             |                                |          |
|---------|----|--------------------|--------------------|-------------------------------------------------------|---------------------------------------------------------|----|-------|-----------------------------|--------------------------------|----------|
| 82_bl-b | 82 | C9orf53;<br>CDKN2A | MODIFIER; MODERATE | n.*616G>A<br>;<br>c.*314C>T;<br>c.*35C>T;<br>c.391C>T | p.Arg131Cys                                             | 2  | FALSE | chr9:2197<br>0967:G:A       | 78:chr9:21<br>970967:G:<br>A   | 0.001512 |
| 82_bl-b | 82 | ALK                | MODERATE           | c.2629G>T                                             | p.Ala877Ser                                             | 1  | FALSE | chr2:2945<br>5173:C:A       | 78:chr2:29<br>455173:C:<br>A   | 0.002815 |
| 82_bl-b | 82 | NTRK1              | MODERATE           | c.1738G>A<br>;<br>c.1828G>A<br>;<br>c.1846G>A         | p.Asp580As<br>n;<br>p.Asp610As<br>n;<br>p.Asp616As<br>n | 1  | FALSE | chr1:1568<br>48954:G:A      | 78:chr1:15<br>6848954:G:<br>A  | 0.001552 |
| 82_bl-b | 82 | EGFR               | MODERATE           | c.627A>C                                              | p.Lys209Asn                                             | 1  | FALSE | chr7:5521<br>9054:A:C       | 78:chr7:55<br>219054:A:<br>C   | 0.001762 |
| 82_bl-b | 82 | BRAF               | MODERATE           | c.1796C>T                                             | p.Thr599Ile                                             | 4  | FALSE | chr7:1404<br>53139:G:A      | 78:chr7:14<br>0453139:G:<br>A  | 0.001157 |
| 82_bl-b | 82 | SMO                | MODERATE           | c.1045A>C                                             | p.Thr349Pro                                             | 0  | FALSE | chr7:1288<br>46115:A:C      | 78:chr7:12<br>8846115:A:<br>C  | 0.015826 |
| 82_bl-b | 82 | ATM                | MODERATE           | c.6751C>A                                             | p.Leu2251Ile                                            | 0  | FALSE | chr11:108<br>196215:C:<br>A | 78:chr11:1<br>08196215:<br>C:A | 0.002582 |
| 82_bl-b | 82 | TP53               | MODIFIER; MODERATE | c.-3G>T;<br>c.358G>T;<br>c.475G>T;<br>c.79G>T         | p.Ala120Ser;<br>p.Ala159Ser;<br>p.Ala27Ser              | 23 | FALSE | chr17:757<br>8455:C:A       | 78:chr17:7<br>578455:C:<br>A   | 0.002144 |
| 82_bl-b | 82 | NTRK2              | MODERATE           | c.1984G>A<br>;<br>c.2032G>A                           | p.Ala662Thr<br>;<br>p.Ala678Thr                         | 0  | FALSE | chr9:8757<br>0292:G:A       | 78:chr9:87<br>570292:G:<br>A   | 0.001471 |
| 82_bl-b | 82 | KDR                | MODERATE           | c.2309G>T                                             | p.Gly770Val                                             | 1  | FALSE | chr4:5596<br>4928:C:A       | 78:chr4:55<br>964928:C:<br>A   | 0.001191 |
| 82_bl-b | 82 | EPHA3              | MODERATE           | c.715C>A                                              | p.Pro239Thr                                             | 0  | FALSE | chr3:8925<br>9571:C:A       | 78:chr3:89<br>259571:C:<br>A   | 0.001137 |
| 82_bl-b | 82 | MAP2K1             | MODERATE           | c.198C>A                                              | p.Asp66Glu                                              | 4  | FALSE | chr15:667<br>27482:C:A      | 78:chr15:6<br>6727482:C:<br>A  | 0.001992 |
| 82_bl-b | 82 | IDH2               | MODERATE           | c.136G>T;<br>c.370G>T;<br>c.526G>T                    | p.Gly46Cys;<br>p.Gly124Cys<br>;<br>p.Gly176Cys          | 1  | FALSE | chr15:906<br>31827:C:A      | 78:chr15:9<br>0631827:C:<br>A  | 0.00157  |
| 82_bl-b | 82 | FGFR3              | MODERATE           | c.905G>A                                              | p.Gly302Asp                                             | 1  | FALSE | chr4:1803<br>727:G:A        | 78:chr4:18<br>03727:G:A        | 0.002334 |

|         |    |        |                    |                                                                    |                                                                         |    |       |                             |                                |          |
|---------|----|--------|--------------------|--------------------------------------------------------------------|-------------------------------------------------------------------------|----|-------|-----------------------------|--------------------------------|----------|
| 82_bl-b | 82 | FGFR2  | MODIFIER; MODERATE | c.749-4686G>T;<br>c.568G>T;<br>c.646G>T;<br>c.913G>T;<br>n.1215G>T | p.Gly190Trp<br>;<br>p.Gly216Trp<br>;<br>p.Gly305Trp                     | 3  | FALSE | chr10:123<br>279519:C:<br>A | 78:chr10:1<br>23279519:<br>C:A | 0.002174 |
| 82_bl-b | 82 | ATM    | MODERATE           | c.6371A>G                                                          | p.Tyr2124Cys                                                            | 0  | FALSE | chr11:108<br>190704:A:<br>G | 78:chr11:1<br>08190704:<br>A:G | 0.001381 |
| 82_bl-b | 82 | EPHA3  | MODERATE           | c.237C>A                                                           | p.Asn79Lys                                                              | 0  | FALSE | chr3:8925<br>9093:C:A       | 78:chr3:89<br>259093:C:<br>A   | 8.00E-04 |
| 82_bl-b | 82 | PIK3CA | MODERATE           | c.3044C>A                                                          | p.Ser1015Ty<br>r                                                        | 3  | FALSE | chr3:1789<br>51989:C:A      | 78:chr3:17<br>8951989:C<br>:A  | 0.0007   |
| 82_bl-b | 82 | ATM    | MODERATE           | c.5639C>G                                                          | p.Thr1880Ar<br>g                                                        | 0  | FALSE | chr11:108<br>175544:C:<br>G | 78:chr11:1<br>08175544:<br>C:G | 0.013492 |
| 82_bl-b | 82 | TP53   | MODERATE           | c.371G>T;<br>c.452G>T;<br>c.731G>T;<br>c.848G>T                    | p.Arg124Leu<br>;<br>p.Arg151Leu<br>;<br>p.Arg244Leu<br>;<br>p.Arg283Leu | 24 | FALSE | chr17:757<br>7090:C:A       | 78:chr17:7<br>577090:C:<br>A   | 0.001442 |
| 82_bl-b | 82 | DDR2   | HIGH               | c.2125C>T                                                          | p.Arg709*                                                               | 4  | FALSE | chr1:1627<br>46002:C:T      | 78:chr1:16<br>2746002:C<br>:T  | 0.000949 |
| 82_bl-b | 82 | NF1    | MODERATE           | c.6314T>C;<br>c.6377T>C                                            | p.Val2105Al<br>a;<br>p.Val2126Al<br>a                                   | 2  | FALSE | chr17:296<br>63882:T:C      | 78:chr17:2<br>9663882:T<br>:C  | 0.001002 |
| 82_bl-b | 82 | ESR1   | MODERATE           | c.1003C>A<br>;<br>c.1006C>A<br>;<br>c.1012C>A                      | p.Pro335Thr<br>;<br>p.Pro336Thr<br>;<br>p.Pro338Thr                     | 0  | FALSE | chr6:1522<br>65553:C:A      | 78:chr6:15<br>2265553:C<br>:A  | 0.001125 |
| 82_bl-b | 82 | DDR2   | MODERATE           | c.313C>A                                                           | p.Arg105Ser                                                             | 2  | FALSE | chr1:1627<br>24541:C:A      | 78:chr1:16<br>2724541:C<br>:A  | 0.001802 |
| 82_bl-b | 82 | EGFR   | MODERATE           | c.866C>A                                                           | p.Ala289Asp                                                             | 34 | FALSE | chr7:5522<br>1822:C:A       | 78:chr7:55<br>221822:C:<br>A   | 0.001432 |

|         |    |                             |                    |                                                                                                                                                           |                                                                                                                                                         |   |       |                             |                                |          |
|---------|----|-----------------------------|--------------------|-----------------------------------------------------------------------------------------------------------------------------------------------------------|---------------------------------------------------------------------------------------------------------------------------------------------------------|---|-------|-----------------------------|--------------------------------|----------|
| 82_bl-b | 82 | FGFR2                       | MODERATE; MODIFIER | c.1260G>T<br>;<br>c.1263G>T<br>;<br>c.1266G>T<br>;<br>c.1275G>T<br>;<br>c.1344G>T<br>;<br>c.1347G>T<br>;<br>c.1611G>T<br>;<br>c.1614G>T<br>;<br>n.2061G>T | p.Met420Ile<br>;<br>p.Met421Ile<br>;<br>p.Met422Ile<br>;<br>p.Met425Ile<br>;<br>p.Met448Ile<br>;<br>p.Met449Ile<br>;<br>p.Met537Ile<br>;<br>p.Met538Ile | 1 | FALSE | chr10:123<br>258070:C:<br>A | 78:chr10:1<br>23258070:<br>C:A | 0.002278 |
| 82_bl-b | 82 | KDR                         | MODERATE           | c.2323G>T                                                                                                                                                 | p.Ala775Ser                                                                                                                                             | 1 | FALSE | chr4:5596<br>4914:C:A       | 78:chr4:55<br>964914:C:<br>A   | 0.010962 |
| 82_bl-b | 82 | MET                         | HIGH               | c.1639C>T                                                                                                                                                 | p.Arg547*                                                                                                                                               | 2 | FALSE | chr7:1163<br>81017:C:T      | 78:chr7:11<br>6381017:C<br>:T  | 0.001217 |
| 82_bl-b | 82 | FLT3                        | MODERATE           | c.1361C>T                                                                                                                                                 | p.Ser454Leu                                                                                                                                             | 0 | FALSE | chr13:286<br>10129:G:A      | 78:chr13:2<br>8610129:G<br>:A  | 0.000628 |
| 82_bl-b | 82 | TP53                        | MODERATE           | c.128G>T;<br>c.209G>T;<br>c.488G>T;<br>c.605G>T                                                                                                           | p.Arg43Leu;<br>p.Arg70Leu;<br>p.Arg163Leu<br>;<br>p.Arg202Leu                                                                                           | 4 | FALSE | chr17:757<br>8244:C:A       | 78:chr17:7<br>578244:C:<br>A   | 0.001657 |
| 82_bl-b | 82 | NOTCH1                      | MODERATE           | c.2860T>C                                                                                                                                                 | p.Cys954Arg                                                                                                                                             | 0 | FALSE | chr9:1394<br>04294:A:G      | 78:chr9:13<br>9404294:A<br>:G  | 0.001685 |
| 82_bl-b | 82 | KIT                         | MODERATE           | c.839C>T                                                                                                                                                  | p.Ala280Val                                                                                                                                             | 1 | FALSE | chr4:5556<br>9972:C:T       | 78:chr4:55<br>569972:C:<br>T   | 0.001092 |
| 82_bl-b | 82 | EGFR                        | MODIFIER; MODERATE | c.*1464G><br>A;<br>c.1606G>A                                                                                                                              | p.Val536Me<br>t                                                                                                                                         | 1 | FALSE | chr7:5522<br>9299:G:A       | 78:chr7:55<br>229299:G:<br>A   | 0.001546 |
| 82_bl-b | 82 | ERBB2;<br>MIEN1;<br>MIR4728 | MODERATE; MODIFIER | c.3025G>A<br>;<br>c.3070G>A<br>;<br>c.3115G>A<br>;<br>n.3439G>A<br>;<br>c.*388C>T;<br>n.*67G>A                                                            | p.Ala1009Th<br>r;<br>p.Ala1024Th<br>r;<br>p.Ala1039Th<br>r;                                                                                             | 2 | FALSE | chr17:378<br>83212:G:A      | 78:chr17:3<br>7883212:G<br>:A  | 0.003593 |
| 82_bl-b | 82 | PIK3CA                      | MODERATE           | c.892C>A                                                                                                                                                  | p.Pro298Thr                                                                                                                                             | 1 | FALSE | chr3:1789<br>21410:C:A      | 78:chr3:17<br>8921410:C<br>:A  | 0.000924 |

|         |    |                           |                    |                                                                                                                                                                                                        |                                                                                                                      |   |       |                        |                               |          |
|---------|----|---------------------------|--------------------|--------------------------------------------------------------------------------------------------------------------------------------------------------------------------------------------------------|----------------------------------------------------------------------------------------------------------------------|---|-------|------------------------|-------------------------------|----------|
| 82_bl-b | 82 | PTEN                      | MODERATE           | c.392C>A                                                                                                                                                                                               | p.Thr131Asn                                                                                                          | 2 | FALSE | chr10:896<br>92908:C:A | 78:chr10:8<br>9692908:C<br>:A | 0.001778 |
| 82_bl-b | 82 | KIT                       | MODERATE           | c.1485C>A                                                                                                                                                                                              | p.Asn495Lys                                                                                                          | 1 | FALSE | chr4:5559<br>2161:C:A  | 78:chr4:55<br>592161:C:<br>A  | 0.00157  |
| 82_bl-b | 82 | APC                       | HIGH               | c.1733C>A<br>;<br>c.1787C>A                                                                                                                                                                            | p.Ser578*;<br>p.Ser596*                                                                                              | 0 | FALSE | chr5:1121<br>70691:C:A | 78:chr5:11<br>2170691:C<br>:A | 0.002013 |
| 82_bl-b | 82 | PDGFRA                    | MODERATE           | c.1114G>A                                                                                                                                                                                              | p.Glu372Lys                                                                                                          | 2 | FALSE | chr4:5513<br>3901:G:A  | 78:chr4:55<br>133901:G:<br>A  | 0.001063 |
| 82_bl-b | 82 | ROS1                      | HIGH               | c.5332G>T                                                                                                                                                                                              | p.Gly1778*                                                                                                           | 1 | FALSE | chr6:1176<br>50526:C:A | 78:chr6:11<br>7650526:C<br>:A | 0.000946 |
| 82_bl-b | 82 | PIK3CA                    | MODERATE           | c.35G>A                                                                                                                                                                                                | p.Gly12Asp                                                                                                           | 5 | FALSE | chr3:1789<br>16648:G:A | 78:chr3:17<br>8916648:G<br>:A | 0.000755 |
| 82_bl-b | 82 | NF1                       | MODERATE           | c.2695T>G                                                                                                                                                                                              | p.Leu899Val                                                                                                          | 3 | FALSE | chr17:295<br>56328:T:G | 78:chr17:2<br>9556328:T<br>:G | 0.017956 |
| 82_bl-b | 82 | MIR1225;<br>PKD1;<br>TSC2 | MODIFIER; MODERATE | n.*90C>T;<br>c.*13118C<br>>T;<br>c.*13121C<br>>T;<br>c.4954G>A<br>;<br>c.5086G>A<br>;<br>c.5155G>A                                                                                                     | p.Ala1652Th<br>r;<br>p.Ala1696Th<br>r;<br>p.Ala1719Th<br>r                                                           | 0 | FALSE | chr16:213<br>8135:G:A  | 78:chr16:2<br>138135:G:<br>A  | 0.001327 |
| 82_bl-b | 82 | RET                       | MODERATE           | c.1690A>C                                                                                                                                                                                              | p.Thr564Pro                                                                                                          | 1 | FALSE | chr10:436<br>08342:A:C | 78:chr10:4<br>3608342:A<br>:C | 0.009373 |
| 82_bl-b | 82 | MAP2K2                    | MODERATE           | c.281C>T                                                                                                                                                                                               | p.Ser94Leu                                                                                                           | 0 | FALSE | chr19:411<br>7439:G:A  | 78:chr19:4<br>117439:G:<br>A  | 0.005348 |
| 82_bl-b | 82 | FGFR1;<br>LETM2           | MODERATE; MODIFIER | c.1777T>G<br>;<br>c.1783T>G<br>;<br>c.2020T>G<br>;<br>c.2044T>G<br>;<br>c.2050T>G<br>;<br>c.2143T>G<br>;<br>c.*1406A><br>C;<br>c.*1423A><br>C;<br>c.*1553A><br>C;<br>c.*1567A><br>C;<br>c.*1638A><br>C | p.Trp593Gly<br>;<br>p.Trp595Gly<br>;<br>p.Trp674Gly<br>;<br>p.Trp682Gly<br>;<br>p.Trp684Gly<br>;<br>p.Trp715Gly<br>; | 1 | FALSE | chr8:3827<br>1806:A:C  | 78:chr8:38<br>271806:A:<br>C  | 0.012953 |

|         |    |            |                    |                                                                           |                                                                                             |       |       |                        |                               |          |
|---------|----|------------|--------------------|---------------------------------------------------------------------------|---------------------------------------------------------------------------------------------|-------|-------|------------------------|-------------------------------|----------|
| 82_bl-b | 82 | EPHA3      | MODERATE           | c.676G>A                                                                  | p.Val226Ile                                                                                 | 0     | FALSE | chr3:8925<br>9532:G:A  | 78:chr3:89<br>259532:G:<br>A  | 0.000691 |
| 82_bl-b | 82 | TP53       | MODERATE           | c.265C>T;<br>c.346C>T;<br>c.625C>T;<br>c.742C>T                           | p.Arg89Trp;<br>p.Arg116Trp<br>;<br>p.Arg209Trp<br>;<br>p.Arg248Trp                          | 559   | FALSE | chr17:757<br>7539:G:A  | 78:chr17:7<br>577539:G:<br>A  | 0.549505 |
| 82_bl-b | 82 | EVI2A; NF1 | MODIFIER; MODERATE | c.-266C>T;<br>c.-338C>T;<br>c.4882G>A<br>;<br>c.4945G>A                   | p.Gly1628Ar<br>g;<br>p.Gly1649Ar<br>g                                                       | 1     | FALSE | chr17:296<br>52947:G:A | 78:chr17:2<br>9652947:G<br>:A | 0.000832 |
| 82_bl-b | 82 | NF1        | MODERATE           | c.8070G>T<br>;<br>c.8133G>T                                               | p.Leu2690P<br>he;<br>p.Leu2711P<br>he                                                       | 1     | FALSE | chr17:296<br>86006:G:T | 78:chr17:2<br>9686006:G<br>:T | 0.024707 |
| 82_bl-b | 82 | FGFR1      | MODERATE           | c.359C>T;<br>c.365C>T;<br>c.608C>T;<br>c.626C>T;<br>c.632C>T;<br>c.725C>T | p.Ala120Val;<br>p.Ala122Val;<br>p.Ala203Val;<br>p.Ala209Val;<br>p.Ala211Val;<br>p.Ala242Val | 1     | FALSE | chr8:3828<br>3753:G:A  | 78:chr8:38<br>283753:G:<br>A  | 0.001572 |
| 82_bl-b | 82 | NF1        | MODERATE           | c.4463G>A<br>;<br>c.4526G>A                                               | p.Arg1488Hi<br>s;<br>p.Arg1509Hi<br>s                                                       | 1     | FALSE | chr17:295<br>87482:G:A | 78:chr17:2<br>9587482:G<br>:A | 0.001008 |
| 82_bl-b | 82 | TP53       | HIGH               | c.415G>T;<br>c.496G>T;<br>c.775G>T;<br>c.892G>T                           | p.Glu139*;<br>p.Glu166*;<br>p.Glu259*;<br>p.Glu298*                                         | 50    | FALSE | chr17:757<br>7046:C:A  | 78:chr17:7<br>577046:C:<br>A  | 0.001327 |
| 82_bl-b | 82 | KRAS       | MODERATE           | c.35G>A                                                                   | p.Gly12Asp                                                                                  | 11213 | FALSE | chr12:253<br>98284:C:T | 78:chr12:2<br>5398284:C<br>:T | 0.455943 |
| 82_bl-b | 82 | TSC2       | MODERATE           | c.866C>T                                                                  | p.Ala289Val                                                                                 | 0     | FALSE | chr16:210<br>8765:C:T  | 78:chr16:2<br>108765:C:<br>T  | 0.001352 |
| 82_bl-b | 82 | DDR2       | MODERATE           | c.2516G>A                                                                 | p.Arg839His                                                                                 | 3     | FALSE | chr1:1627<br>49984:G:A | 78:chr1:16<br>2749984:G<br>:A | 0.00114  |
| 82_bl-b | 82 | EGFR       | MODERATE           | c.1168C>A                                                                 | p.Gln390Lys                                                                                 | 1     | FALSE | chr7:5522<br>4486:C:A  | 78:chr7:55<br>224486:C:<br>A  | 0.001115 |

|           |    |        |          |                                       |                                             |       |       |                    |                       |          |
|-----------|----|--------|----------|---------------------------------------|---------------------------------------------|-------|-------|--------------------|-----------------------|----------|
| 82_bl-b   | 82 | IGF1R  | MODERATE | c.3905T>C;<br>c.3908T>C               | p.Val1302Ala;<br>p.Val1303Ala               | 0     | FALSE | chr15:99500475:T:C | 78:chr15:99500475:T:C | 0.010212 |
| 82_bl-b   | 82 | FBXW7  | HIGH     | c.1177C>T;<br>c.823C>T;<br>c.937C>T   | p.Arg393*;<br>p.Arg275*;<br>p.Arg313*       | 0     | FALSE | chr4:153250883:G:A | 78:chr4:153250883:G:A | 0.001327 |
| 82_bl-b   | 82 | IDH1   | MODERATE | c.299G>T                              | p.Arg100Leu                                 | 5     | FALSE | chr2:209113208:C:A | 78:chr2:209113208:C:A | 0.001187 |
| 82_bl-b   | 82 | NTRK2  | MODERATE | c.1981G>A;<br>c.2029G>A               | p.Ala661Thr;<br>p.Ala677Thr                 | 0     | FALSE | chr9:87570289:G:A  | 78:chr9:87570289:G:A  | 0.001475 |
| 82_bl-b   | 82 | DDR2   | MODERATE | c.1598C>A                             | p.Thr533Lys                                 | 1     | FALSE | chr1:162741907:C:A | 78:chr1:162741907:C:A | 0.001567 |
| 82_bl-b   | 82 | ALK    | MODERATE | c.3521T>C                             | p.Phe1174Ser                                | 9     | FALSE | chr2:29443696:A:G  | 78:chr2:29443696:A:G  | 0.001546 |
| 82_bl-b   | 82 | NF1    | HIGH     | c.5817C>A;<br>c.5880C>A               | p.Cys1939*;<br>p.Cys1960*                   | 1     | FALSE | chr17:29661923:C:A | 78:chr17:29661923:C:A | 0.002302 |
| 82_bl-b   | 82 | EPHA3  | MODERATE | c.1234G>A                             | p.Val412Ile                                 | 0     | FALSE | chr3:89391168:G:A  | 78:chr3:89391168:G:A  | 0.000876 |
| 82_bl-b   | 82 | NTRK1  | MODERATE | c.1940T>G;<br>c.2030T>G;<br>c.2048T>G | p.Val647Gly;<br>p.Val677Gly;<br>p.Val683Gly | 2     | FALSE | chr1:156849792:T:G | 78:chr1:156849792:T:G | 0.023381 |
| 82_bl-b   | 82 | SMO    | MODERATE | c.1193G>A                             | p.Arg398Gln                                 | 0     | FALSE | chr7:128846357:G:A | 78:chr7:128846357:G:A | 0.001085 |
| 82_bl-b   | 82 | FBXW7  | HIGH     | c.1027G>T;<br>c.1267G>T;<br>c.913G>T  | p.Gly343*;<br>p.Gly423*;<br>p.Gly305*       | 0     | FALSE | chr4:153249511:C:A | 78:chr4:153249511:C:A | 0.001676 |
| 82_bl-b   | 82 | PDGFRA | MODERATE | c.3078C>A                             | p.Asp1026Glu                                | 1     | FALSE | chr4:55156677:C:A  | 78:chr4:55156677:C:A  | 0.001202 |
| 82_bl-b   | 82 | PIK3CA | MODERATE | c.1634A>C                             | p.Glu545Ala                                 | 132   | FALSE | chr3:178936092:A:C | 78:chr3:178936092:A:C | 0.009385 |
| 82_bl-b   | 82 | NOTCH1 | MODERATE | c.4252G>A                             | p.Ala1418Thr                                | 0     | FALSE | chr9:139400096:C:T | 78:chr9:139400096:C:T | 0.002227 |
| 25_t2c5-1 | 25 | BRAF   | MODERATE | c.1799T>A                             | p.Val600Glu                                 | 23024 | FALSE | chr7:140453136:A:T | 79:chr7:140453136:A:T | 0.019929 |
| 25_t2c5-1 | 25 | NTRK1  | MODERATE | c.1975C>T;<br>c.2065C>T;<br>c.2083C>T | p.Pro659Ser;<br>p.Pro689Ser;<br>p.Pro695Ser | 2     | FALSE | chr1:156849827:C:T | 79:chr1:156849827:C:T | 0.002602 |



|           |    |                    |                    |                                                                                                                                                                                |                                                                                                                      |   |       |                             |                                |          |
|-----------|----|--------------------|--------------------|--------------------------------------------------------------------------------------------------------------------------------------------------------------------------------|----------------------------------------------------------------------------------------------------------------------|---|-------|-----------------------------|--------------------------------|----------|
| 25_t2c5-1 | 25 | CDH1               | MODERATE           | c.2156C>T                                                                                                                                                                      | p.Ala719Val                                                                                                          | 0 | FALSE | chr16:688<br>57521:C:T      | 79:chr16:6<br>8857521:C<br>:T  | 0.001329 |
| 25_t2c5-1 | 25 | NOTCH1             | MODERATE           | c.3407G>T                                                                                                                                                                      | p.Gly1136Val                                                                                                         | 0 | FALSE | chr9:1394<br>02510:C:A      | 79:chr9:13<br>9402510:C<br>:A  | 0.001665 |
| 25_t2c5-1 | 25 | ATM                | MODERATE           | c.8762C>T                                                                                                                                                                      | p.Thr2921Met                                                                                                         | 0 | FALSE | chr11:108<br>224583:C:<br>T | 79:chr11:1<br>08224583:<br>C:T | 0.002721 |
| 25_t2c5-1 | 25 | CTNNB1             | MODERATE           | c.884C>A                                                                                                                                                                       | p.Ala295Asp                                                                                                          | 0 | FALSE | chr3:4126<br>7300:C:A       | 79:chr3:41<br>267300:C:<br>A   | 0.002778 |
| 25_t2c5-1 | 25 | EGFR               | MODERATE           | c.719G>A                                                                                                                                                                       | p.Cys240Tyr                                                                                                          | 1 | FALSE | chr7:5522<br>0329:G:A       | 79:chr7:55<br>220329:G:<br>A   | 0.001421 |
| 25_t2c5-1 | 25 | NOTCH1             | MODERATE           | c.6121G>T                                                                                                                                                                      | p.Val2041Leu                                                                                                         | 0 | FALSE | chr9:1393<br>93410:C:A      | 79:chr9:13<br>9393410:C<br>:A  | 0.001723 |
| 25_t2c5-1 | 25 | PDGFRA             | MODERATE           | c.364C>A                                                                                                                                                                       | p.Pro122Thr                                                                                                          | 1 | FALSE | chr4:5512<br>7576:C:A       | 79:chr4:55<br>127576:C:<br>A   | 0.002502 |
| 25_t2c5-1 | 25 | VHL                | MODIFIER; MODERATE | c.341-<br>3238G>A;<br>c.376G>A                                                                                                                                                 | p.Asp126Asn                                                                                                          | 0 | FALSE | chr3:1018<br>8233:G:A       | 79:chr3:10<br>188233:G:<br>A   | 0.0013   |
| 25_t2c5-1 | 25 | C9orf53;<br>CDKN2A | MODIFIER; LOW      | n.*616C>A<br>;<br>c.*328G>T<br>; c.*49G>T;<br>c.405G>T                                                                                                                         | p.Gly135Gly                                                                                                          | 1 | FALSE | chr9:2197<br>0953:C:A       | 79:chr9:21<br>970953:C:<br>A   | 0.00158  |
| 25_t2c5-1 | 25 | CTNNB1             | MODERATE           | c.91C>A                                                                                                                                                                        | p.Leu31Met                                                                                                           | 0 | FALSE | chr3:4126<br>6094:C:A       | 79:chr3:41<br>266094:C:<br>A   | 0.001975 |
| 25_t2c5-1 | 25 | FGFR1;<br>LETM2    | MODERATE; MODIFIER | c.1927C>T;<br>c.1933C>T;<br>c.2170C>T;<br>c.2194C>T;<br>c.2200C>T;<br>c.2293C>T;<br>c.*1406G><br>A;<br>c.*1423G><br>A;<br>c.*1553G><br>A;<br>c.*1567G><br>A;<br>c.*1638G><br>A | p.Arg643Trp<br>;<br>p.Arg645Trp<br>;<br>p.Arg724Trp<br>;<br>p.Arg732Trp<br>;<br>p.Arg734Trp<br>;<br>p.Arg765Trp<br>; | 1 | FALSE | chr8:3827<br>1528:G:A       | 79:chr8:38<br>271528:G:<br>A   | 0.002004 |
| 25_t2c5-1 | 25 | IGF1R              | MODERATE           | c.880G>A                                                                                                                                                                       | p.Glu294Lys                                                                                                          | 0 | FALSE | chr15:994<br>34793:G:A      | 79:chr15:9<br>9434793:G<br>:A  | 0.001438 |

|           |    |                    |                    |                                                 |                                                                         |    |       |                        |                               |          |
|-----------|----|--------------------|--------------------|-------------------------------------------------|-------------------------------------------------------------------------|----|-------|------------------------|-------------------------------|----------|
| 25_t2c5-1 | 25 | ALK                | HIGH               | c.4414G>T                                       | p.Glu1472*                                                              | 1  | FALSE | chr2:2941<br>6539:C:A  | 79:chr2:29<br>416539:C:<br>A  | 0.001177 |
| 25_t2c5-1 | 25 | PTEN               | MODERATE           | c.421C>A                                        | p.His141Asn                                                             | 2  | FALSE | chr10:896<br>92937:C:A | 79:chr10:8<br>9692937:C<br>:A | 0.001367 |
| 25_t2c5-1 | 25 | TP53               | MODERATE           | c.105G>T;<br>c.24G>T;<br>c.384G>T;<br>c.501G>T  | p.Gln35His;<br>p.Gln8His;<br>p.Gln128His<br>;<br>p.Gln167His            | 3  | FALSE | chr17:757<br>8429:C:A  | 79:chr17:7<br>578429:C:<br>A  | 0.002117 |
| 25_t2c5-1 | 25 | RET                | MODERATE           | c.1696C>A                                       | p.Pro566Thr                                                             | 1  | FALSE | chr10:436<br>08348:C:A | 79:chr10:4<br>3608348:C<br>:A | 0.001271 |
| 25_t2c5-1 | 25 | MIR4673;<br>NOTCH1 | MODIFIER; MODERATE | n.-1G>T;<br>c.221G>T                            | ;<br>p.Cys74Phe                                                         | 0  | FALSE | chr9:1394<br>18351:C:A | 79:chr9:13<br>9418351:C<br>:A | 0.003003 |
| 25_t2c5-1 | 25 | TP53               | MODERATE           | c.355C>T;<br>c.436C>T;<br>c.715C>T;<br>c.832C>T | p.Pro119Ser<br>;<br>p.Pro146Ser<br>;<br>p.Pro239Ser<br>;<br>p.Pro278Ser | 59 | FALSE | chr17:757<br>7106:G:A  | 79:chr17:7<br>577106:G:<br>A  | 0.010021 |
| 25_t2c5-1 | 25 | MAP2K1             | MODERATE           | c.198C>A                                        | p.Asp66Glu                                                              | 4  | FALSE | chr15:667<br>27482:C:A | 79:chr15:6<br>6727482:C<br>:A | 0.00147  |
| 25_t2c5-1 | 25 | NF1                | MODERATE           | c.7733C>T;<br>c.7796C>T                         | p.Ser2578Phe;<br>p.Ser2599Phe                                           | 1  | FALSE | chr17:296<br>84035:C:T | 79:chr17:2<br>9684035:C<br>:T | 0.001416 |
| 25_t2c5-1 | 25 | TP53               | MODERATE           | c.234G>T;<br>c.315G>T;<br>c.594G>T;<br>c.711G>T | p.Met78Ile;<br>p.Met105Ile<br>;<br>p.Met198Ile<br>;<br>p.Met237Ile      | 81 | FALSE | chr17:757<br>7570:C:A  | 79:chr17:7<br>577570:C:<br>A  | 0.001206 |
| 25_t2c5-1 | 25 | IGF1R              | MODERATE           | c.3905T>C;<br>c.3908T>C                         | p.Val1302Ala;<br>p.Val1303Ala                                           | 0  | FALSE | chr15:995<br>00475:T:C | 79:chr15:9<br>9500475:T<br>:C | 0.004237 |
| 25_t2c5-1 | 25 | EGFR               | MODERATE           | c.406C>A                                        | p.Pro136Thr                                                             | 1  | FALSE | chr7:5521<br>1163:C:A  | 79:chr7:55<br>211163:C:<br>A  | 0.00277  |
| 25_t2c5-1 | 25 | EGFR               | MODIFIER; MODERATE | c.*2364G><br>A;<br>c.2161G>A                    | p.Gly721Ser                                                             | 5  | FALSE | chr7:5524<br>1713:G:A  | 79:chr7:55<br>241713:G:<br>A  | 0.00139  |
| 25_t2c5-1 | 25 | FGFR1              | MODIFIER; MODERATE | c.-85G>T;<br>c.107G>T;<br>c.8G>T                | p.Ser36Ile;<br>p.Ser3Ile                                                | 1  | FALSE | chr8:3831<br>4957:C:A  | 79:chr8:38<br>314957:C:<br>A  | 0.001263 |
| 25_t2c5-1 | 25 | EGFR               | MODIFIER; MODERATE | c.*1464C><br>T;<br>c.1279C>T                    | p.Arg427Cys                                                             | 2  | FALSE | chr7:5522<br>5427:C:T  | 79:chr7:55<br>225427:C:<br>T  | 0.001334 |

|           |    |                             |                            |                                                                                                |                                                             |      |       |                        |                               |          |
|-----------|----|-----------------------------|----------------------------|------------------------------------------------------------------------------------------------|-------------------------------------------------------------|------|-------|------------------------|-------------------------------|----------|
| 25_t2c5-1 | 25 | TP53                        | LOW; MODIFIER;<br>MODERATE | c.-18G>T;<br>c.343G>T;<br>c.460G>T;<br>c.64G>T                                                 | ; p.Gly115Cys<br>;<br>; p.Gly154Cys<br>; p.Gly22Cys         | 9    | FALSE | chr17:757<br>8470:C:A  | 79:chr17:7<br>578470:C:<br>A  | 0.001441 |
| 25_t2c5-1 | 25 | NOTCH1                      | MODERATE                   | c.5347C>T                                                                                      | p.Arg1783Tr<br>p                                            | 0    | FALSE | chr9:1393<br>96761:G:A | 79:chr9:13<br>9396761:G<br>:A | 0.00197  |
| 25_t2c5-1 | 25 | PIK3R1                      | HIGH                       | c.901C>T                                                                                       | p.Arg301*                                                   | 1    | FALSE | chr5:6757<br>6819:C:T  | 79:chr5:67<br>576819:C:<br>T  | 0.001366 |
| 25_t2c5-1 | 25 | TP53                        | MODERATE; MODIFIER         | c.211C>T;<br>c.328C>T;<br>c.-279C>T;<br>c.-360C>T                                              | p.Arg71Cys;<br>p.Arg110Cys<br>;                             | 6    | FALSE | chr17:757<br>9359:G:A  | 79:chr17:7<br>579359:G:<br>A  | 0.005857 |
| 25_t2c5-1 | 25 | HGF                         | HIGH                       | c.1582C>T;<br>c.1597C>T                                                                        | p.Arg528*;<br>p.Arg533*                                     | 0    | FALSE | chr7:8133<br>6625:G:A  | 79:chr7:81<br>336625:G:<br>A  | 0.001584 |
| 25_t2c5-1 | 25 | TSC1                        | HIGH                       | c.496G>T;<br>c.649G>T                                                                          | p.Glu166*;<br>p.Glu217*                                     | 0    | FALSE | chr9:1357<br>97220:C:A | 79:chr9:13<br>5797220:C<br>:A | 0.003006 |
| 25_t2c5-1 | 25 | TSC2                        | MODERATE                   | c.3289G>A<br>;<br>c.3421G>A                                                                    | p.Ala1097Th<br>r;<br>p.Ala1141Th<br>r                       | 0    | FALSE | chr16:213<br>0189:G:A  | 79:chr16:2<br>130189:G:<br>A  | 0.001762 |
| 25_t2c5-1 | 25 | NOTCH1                      | MODERATE                   | c.3859C>T                                                                                      | p.Arg1287C<br>ys                                            | 0    | FALSE | chr9:1394<br>01210:G:A | 79:chr9:13<br>9401210:G<br>:A | 0.001506 |
| 25_t2c5-1 | 25 | C9orf53;<br>CDKN2A          | MODIFIER; MODERATE;<br>LOW | n.*616T>G<br>;<br>c.*120A>C<br>;<br>c.197A>C;<br>c.240A>C                                      | ; p.His66Pro;<br>; p.Pro80Pro                               | 1    | FALSE | chr9:2197<br>1161:T:G  | 79:chr9:21<br>971161:T:<br>G  | 0.029312 |
| 25_t2c5-1 | 25 | ERBB2;<br>MIEN1;<br>MIR4728 | MODERATE; MODIFIER         | c.3025G>A<br>;<br>c.3070G>A<br>;<br>c.3115G>A<br>;<br>n.3439G>A<br>;<br>c.*388C>T;<br>n.*67G>A | p.Ala1009Th<br>r;<br>p.Ala1024Th<br>r;<br>p.Ala1039Th<br>r; | 2    | FALSE | chr17:378<br>83212:G:A | 79:chr17:3<br>7883212:G<br>:A | 0.001754 |
| 25_t2c5-1 | 25 | IDH1                        | MODERATE                   | c.395G>A                                                                                       | p.Arg132His                                                 | 4157 | FALSE | chr2:2091<br>13112:C:T | 79:chr2:20<br>9113112:C<br>:T | 0.002186 |

|           |    |                   |                    |                                                                        |                                                                         |   |       |                             |                                |          |
|-----------|----|-------------------|--------------------|------------------------------------------------------------------------|-------------------------------------------------------------------------|---|-------|-----------------------------|--------------------------------|----------|
| 25_t2c5-1 | 25 | TP53              | MODIFIER; MODERATE | c.-13G>T;<br>c.105G>T;<br>c.-279G>T;<br>c.-360G>T                      | p.Leu35Phe                                                              | 2 | FALSE | chr17:757<br>9582:C:A       | 79:chr17:7<br>579582:C:<br>A   | 0.001549 |
| 25_t2c5-1 | 25 | KRAS              | MODERATE           | c.204G>T                                                               | p.Arg68Ser                                                              | 1 | FALSE | chr12:253<br>80254:C:A      | 79:chr12:2<br>5380254:C<br>:A  | 0.002011 |
| 25_t2c5-1 | 25 | NTRK3             | MODERATE           | c.1071G>T                                                              | p.Glu357As<br>p                                                         | 0 | FALSE | chr15:886<br>78465:C:A      | 79:chr15:8<br>8678465:C<br>:A  | 0.001365 |
| 25_t2c5-1 | 25 | APC               | MODERATE           | c.1171C>A<br>;<br>c.1225C>A                                            | p.Leu391Ile;<br>p.Leu409Ile                                             | 0 | FALSE | chr5:1121<br>54954:C:A      | 79:chr5:11<br>2154954:C<br>:A  | 0.0013   |
| 25_t2c5-1 | 25 | SMO               | MODERATE           | c.961G>A                                                               | p.Val321Me<br>t                                                         | 0 | FALSE | chr7:1288<br>46031:G:A      | 79:chr7:12<br>8846031:G<br>:A  | 0.001296 |
| 25_t2c5-1 | 25 | TP53              | MODERATE           | c.352T>G;<br>c.433T>G;<br>c.712T>G;<br>c.829T>G                        | p.Cys118Gly<br>;<br>p.Cys145Gly<br>;<br>p.Cys238Gly<br>;<br>p.Cys277Gly | 5 | FALSE | chr17:757<br>7109:A:C       | 79:chr17:7<br>577109:A:<br>C   | 0.002216 |
| 25_t2c5-1 | 25 | APC               | MODERATE           | c.703G>A;<br>c.757G>A                                                  | p.Gly235Ser<br>;<br>p.Gly253Ser                                         | 0 | FALSE | chr5:1121<br>37003:G:A      | 79:chr5:11<br>2137003:G<br>:A  | 0.001343 |
| 25_t2c5-1 | 25 | EGFR;<br>EGFR-AS1 | MODERATE; MODIFIER | c.2591C>T;<br>n.-1G>A                                                  | p.Ala864Val;                                                            | 2 | FALSE | chr7:5525<br>9533:C:T       | 79:chr7:55<br>259533:C:<br>T   | 0.002357 |
| 25_t3c2-1 | 25 | ATM               | MODERATE           | c.7183G>A                                                              | p.Asp2395A<br>sn                                                        | 0 | FALSE | chr11:108<br>199841:G:<br>A | 80:chr11:1<br>08199841:<br>G:A | 0.001127 |
| 25_t3c2-1 | 25 | FGFR2             | MODIFIER; MODERATE | c.749-<br>4686G>A;<br>c.568G>A;<br>c.646G>A;<br>c.913G>A;<br>n.1215G>A | p.Gly190Arg<br>;<br>p.Gly216Arg<br>;<br>p.Gly305Arg                     | 3 | FALSE | chr10:123<br>279519:C:<br>T | 80:chr10:1<br>23279519:<br>C:T | 0.001265 |
| 25_t3c2-1 | 25 | CDH1              | MODERATE           | c.1489G>A                                                              | p.Glu497Lys                                                             | 0 | FALSE | chr16:688<br>49586:G:A      | 80:chr16:6<br>8849586:G<br>:A  | 0.001064 |
| 25_t3c2-1 | 25 | KLLN;<br>PTEN     | MODIFIER; MODERATE | c.-951C>T;<br>c.59G>A                                                  | p.Gly20Glu                                                              | 1 | FALSE | chr10:896<br>24285:G:A      | 80:chr10:8<br>9624285:G<br>:A  | 0.001496 |
| 25_t3c2-1 | 25 | IDH2              | LOW; MODIFIER      | c.-4G>T; c.-<br>17-<br>2860G>T;<br>c.153G>T                            | p.Val51Val                                                              | 1 | FALSE | chr15:906<br>34839:C:A      | 80:chr15:9<br>0634839:C<br>:A  | 0.001418 |

|           |    |                                  |                    |                                                   |                                                            |       |       |                    |                       |          |
|-----------|----|----------------------------------|--------------------|---------------------------------------------------|------------------------------------------------------------|-------|-------|--------------------|-----------------------|----------|
| 25_t3c2-1 | 25 | PTEN                             | MODERATE           | c.443C>A                                          | p.Ala148Glu                                                | 1     | FALSE | chr10:89692959:C:A | 80:chr10:89692959:C:A | 0.002517 |
| 25_t3c2-1 | 25 | FBXW7                            | MODERATE           | c.1078G>T;<br>c.1318G>T;<br>c.964G>T              | p.Asp360Tyr;<br>p.Asp440Tyr;<br>p.Asp322Tyr                | 0     | FALSE | chr4:153249460:C:A | 80:chr4:153249460:C:A | 0.001638 |
| 25_t3c2-1 | 25 | FGFR3                            | MODERATE           | c.905G>A                                          | p.Gly302Asp                                                | 1     | FALSE | chr4:1803727:G:A   | 80:chr4:1803727:G:A   | 0.001375 |
| 25_t3c2-1 | 25 | TP53                             | MODERATE           | c.242G>T;<br>c.323G>T;<br>c.602G>T;<br>c.719G>T   | p.Ser81Ile;<br>p.Ser108Ile;<br>p.Ser201Ile;<br>p.Ser240Ile | 6     | FALSE | chr17:7577562:C:A  | 80:chr17:7577562:C:A  | 0.001583 |
| 25_t3c2-1 | 25 | KIT                              | MODERATE           | c.1156G>A                                         | p.Glu386Lys                                                | 1     | FALSE | chr4:55575630:G:A  | 80:chr4:55575630:G:A  | 0.001149 |
| 25_t3c2-1 | 25 | CDH1                             | MODERATE           | c.1468G>A                                         | p.Glu490Lys                                                | 0     | FALSE | chr16:68849565:G:A | 80:chr16:68849565:G:A | 0.001079 |
| 25_t3c2-1 | 25 | FBXW7                            | MODERATE           | c.1204G>T;<br>c.1318G>T;<br>c.1558G>T             | p.Asp402Tyr;<br>p.Asp440Tyr;<br>p.Asp520Tyr                | 0     | FALSE | chr4:153247244:C:A | 80:chr4:153247244:C:A | 0.000986 |
| 25_t3c2-1 | 25 | PIK3R1                           | LOW; MODIFIER      | c.1017G>A;<br>c.117G>A;<br>c.207G>A;<br>c.-233G>A | p.Ser339Ser;<br>p.Ser39Ser;<br>p.Ser69Ser;                 | 1     | FALSE | chr5:67588187:G:A  | 80:chr5:67588187:G:A  | 0.001176 |
| 25_t3c2-1 | 25 | KIT                              | MODERATE           | c.273C>A                                          | p.Asn91Lys                                                 | 1     | FALSE | chr4:55561883:C:A  | 80:chr4:55561883:C:A  | 0.001024 |
| 25_t3c2-1 | 25 | CTNNB1                           | MODERATE           | c.98C>A                                           | p.Ser33Tyr                                                 | 0     | FALSE | chr3:41266101:C:A  | 80:chr3:41266101:C:A  | 0.001027 |
| 25_t3c2-1 | 25 | BRAF                             | MODERATE           | c.1799T>A                                         | p.Val600Glu                                                | 23024 | FALSE | chr7:140453136:A:T | 80:chr7:140453136:A:T | 0.012353 |
| 25_t3c2-1 | 25 | MIR4674;<br>MIR4674HG;<br>NOTCH1 | MODIFIER; MODERATE | n.*87G>T;<br>n.-1C>A;<br>c.62G>T                  | p.Gly21Val                                                 | 0     | FALSE | chr9:139438554:C:A | 80:chr9:139438554:C:A | 0.003226 |
| 25_t3c2-1 | 25 | NF1                              | MODERATE           | c.3559C>A                                         | p.Leu1187Ile                                               | 1     | FALSE | chr17:29560082:C:A | 80:chr17:29560082:C:A | 0.00111  |

|           |    |                    |                    |                                                                                                   |                                                                         |    |       |                             |                                |          |
|-----------|----|--------------------|--------------------|---------------------------------------------------------------------------------------------------|-------------------------------------------------------------------------|----|-------|-----------------------------|--------------------------------|----------|
| 25_t3c2-1 | 25 | TP53               | MODIFIER; MODERATE | c.*137A>G<br>;<br>c.*225A>G<br>;<br>c.1001A>G<br>;<br>c.1118A>G<br>;<br>c.641A>G<br>;<br>c.722A>G | p.Lys334Arg<br>;<br>p.Lys373Arg<br>;<br>p.Lys214Arg<br>;<br>p.Lys241Arg | 1  | FALSE | chr17:757<br>2991:T:C       | 80:chr17:7<br>572991:T:<br>C   | 0.00613  |
| 25_t3c2-1 | 25 | ALK                | MODERATE           | c.741G>T                                                                                          | p.Trp247Cys                                                             | 1  | FALSE | chr2:2994<br>0490:C:A       | 80:chr2:29<br>940490:C:<br>A   | 0.001016 |
| 25_t3c2-1 | 25 | MIR4673;<br>NOTCH1 | MODIFIER; MODERATE | n.*59G>T;<br>;<br>c.1343G>T                                                                       | p.Arg448Leu                                                             | 0  | FALSE | chr9:1394<br>12302:C:A      | 80:chr9:13<br>9412302:C:<br>:A | 0.001664 |
| 25_t3c2-1 | 25 | SMO                | MODERATE           | c.517C>A                                                                                          | p.Arg173Ser                                                             | 0  | FALSE | chr7:1288<br>43410:C:A      | 80:chr7:12<br>8843410:C:<br>:A | 0.001244 |
| 25_t3c2-1 | 25 | TP53               | MODERATE           | c.248G>A;<br>c.329G>A;<br>c.608G>A;<br>c.725G>A                                                   | p.Cys83Tyr;<br>p.Cys110Tyr<br>;<br>p.Cys203Tyr<br>;<br>p.Cys242Tyr      | 72 | FALSE | chr17:757<br>7556:C:T       | 80:chr17:7<br>577556:C:<br>T   | 0.001037 |
| 25_t3c2-1 | 25 | ATM                | MODERATE           | c.3070G>A                                                                                         | p.Ala1024Thr                                                            | 0  | FALSE | chr11:108<br>142126:G:<br>A | 80:chr11:1<br>08142126:<br>G:A | 0.00137  |
| 25_t3c2-1 | 25 | SMO                | MODERATE           | c.1691A>G                                                                                         | p.Lys564Arg                                                             | 0  | FALSE | chr7:1288<br>50844:A:G      | 80:chr7:12<br>8850844:A:<br>:G | 0.001622 |
| 25_t3c2-1 | 25 | PTEN               | MODERATE           | c.1041C>A                                                                                         | p.Phe347Leu                                                             | 1  | FALSE | chr10:897<br>25058:C:A      | 80:chr10:8<br>9725058:C:<br>:A | 0.001542 |
| 25_t3c2-1 | 25 | TP53               | MODERATE           | c.359G>T;<br>c.440G>T;<br>c.719G>T;<br>c.836G>T                                                   | p.Gly120Val;<br>p.Gly147Val;<br>p.Gly240Val;<br>p.Gly279Val             | 37 | FALSE | chr17:757<br>7102:C:A       | 80:chr17:7<br>577102:C:<br>A   | 0.001066 |
| 25_t3c2-1 | 25 | TP53               | MODERATE           | c.261G>A;<br>c.342G>A;<br>c.621G>A;<br>c.738G>A                                                   | p.Met87Ile;<br>p.Met114Ile<br>;<br>p.Met207Ile<br>;<br>p.Met246Ile      | 21 | FALSE | chr17:757<br>7543:C:T       | 80:chr17:7<br>577543:C:<br>T   | 0.001096 |

|           |    |                    |                            |                                                                    |                                                         |   |       |                             |                                |          |
|-----------|----|--------------------|----------------------------|--------------------------------------------------------------------|---------------------------------------------------------|---|-------|-----------------------------|--------------------------------|----------|
| 25_t3c2-1 | 25 | FGFR2              | MODIFIER; MODERATE         | c.749-4842C>T;<br>c.412C>T;<br>c.490C>T;<br>c.757C>T;<br>n.1059C>T | ; p.Pro138Ser<br>;<br>p.Pro164Ser<br>;<br>p.Pro253Ser   | 1 | FALSE | chr10:123<br>279675:G:<br>A | 80:chr10:1<br>23279675:<br>G:A | 0.001373 |
| 25_t3c2-1 | 25 | NOTCH1             | HIGH                       | c.5110G>T                                                          | p.Gly1704*                                              | 0 | FALSE | chr9:1393<br>97691:C:A      | 80:chr9:13<br>9397691:C<br>:A  | 0.00207  |
| 25_t3c2-1 | 25 | ATM                | MODERATE                   | c.1237C>A                                                          | p.Leu413Ile                                             | 0 | FALSE | chr11:108<br>121429:C:<br>A | 80:chr11:1<br>08121429:<br>C:A | 0.002326 |
| 25_t3c2-1 | 25 | TP53               | MODERATE; MODIFIER         | c.211C>T;<br>c.328C>T;<br>c.-279C>T;<br>c.-360C>T                  | p.Arg71Cys;<br>p.Arg110Cys<br>;                         | 6 | FALSE | chr17:757<br>9359:G:A       | 80:chr17:7<br>579359:G:<br>A   | 0.002571 |
| 25_t3c2-1 | 25 | NTRK1              | MODERATE                   | c.804C>G;<br>c.894C>G                                              | p.His268Gln<br>;<br>p.His298Gln                         | 1 | FALSE | chr1:1568<br>43468:C:G      | 80:chr1:15<br>6843468:C<br>:G  | 0.002155 |
| 25_t3c2-1 | 25 | C9orf53;<br>CDKN2A | MODIFIER; MODERATE;<br>LOW | n.*616T>G<br>;<br>c.*120A>C<br>;<br>c.197A>C;<br>c.240A>C          | p.His66Pro;<br>p.Pro80Pro                               | 1 | FALSE | chr9:2197<br>1161:T:G       | 80:chr9:21<br>971161:T:<br>G   | 0.028971 |
| 25_t3c2-1 | 25 | PTEN               | MODERATE                   | c.729C>A                                                           | p.Phe243Le<br>u                                         | 1 | FALSE | chr10:897<br>17704:C:A      | 80:chr10:8<br>9717704:C<br>:A  | 0.001858 |
| 25_t3c2-1 | 25 | SMO                | MODERATE                   | c.1045A>C                                                          | p.Thr349Pro                                             | 0 | FALSE | chr7:1288<br>46115:A:C      | 80:chr7:12<br>8846115:A<br>:C  | 0.002197 |
| 25_t3c2-1 | 25 | FGFR4              | MODERATE                   | c.1444G>A<br>;<br>c.1528G>A<br>;<br>c.1648G>A                      | p.Val482Me<br>t;<br>p.Val510Me<br>t;<br>p.Val550Me<br>t | 2 | FALSE | chr5:1765<br>22551:G:A      | 80:chr5:17<br>6522551:G<br>:A  | 0.001502 |
| 25_t3c2-1 | 25 | C9orf53;<br>CDKN2A | MODIFIER; MODERATE         | n.*616T>C<br>;<br>c.*77A>G;<br>c.154A>G;<br>c.197A>G               | p.Met52Val;<br>p.His66Arg                               | 1 | FALSE | chr9:2197<br>1204:T:C       | 80:chr9:21<br>971204:T:<br>C   | 0.001765 |

|           |    |                             |                    |                                                                                                                      |                                                                         |    |       |                        |                               |          |
|-----------|----|-----------------------------|--------------------|----------------------------------------------------------------------------------------------------------------------|-------------------------------------------------------------------------|----|-------|------------------------|-------------------------------|----------|
| 25_t3c2-1 | 25 | TP53                        | MODIFIER; MODERATE | c.-11G>T;<br>c.350G>T;<br>c.467G>T;<br>c.71G>T                                                                       | ; p.Arg117Leu<br>;<br>; p.Arg156Leu<br>; p.Arg24Leu                     | 26 | FALSE | chr17:757<br>8463:C:A  | 80:chr17:7<br>578463:C:<br>A  | 0.00129  |
| 25_t3c2-1 | 25 | MIR4673;<br>NOTCH1          | MODIFIER; MODERATE | n.*59G>T;<br>c.1286G>T                                                                                               | ; p.Cys429Ph<br>e                                                       | 0  | FALSE | chr9:1394<br>12359:C:A | 80:chr9:13<br>9412359:C<br>:A | 0.002486 |
| 25_t3c2-1 | 25 | CTNNB1                      | MODERATE           | c.2212G>A                                                                                                            | p.Glu738Lys                                                             | 0  | FALSE | chr3:4128<br>0699:G:A  | 80:chr3:41<br>280699:G:<br>A  | 0.001027 |
| 25_t3c2-1 | 25 | IGF1R                       | MODERATE           | c.3905T>C;<br>c.3908T>C                                                                                              | p.Val1302Al<br>a;<br>p.Val1303Al<br>a                                   | 0  | FALSE | chr15:995<br>00475:T:C | 80:chr15:9<br>9500475:T<br>:C | 0.002495 |
| 25_t3c2-1 | 25 | EGFR;<br>EGFR-AS1           | MODERATE; MODIFIER | c.2356G>A<br>;<br>n.1206C>T                                                                                          | p.Val786Me<br>t;                                                        | 6  | FALSE | chr7:5524<br>9058:G:A  | 80:chr7:55<br>249058:G:<br>A  | 0.001185 |
| 25_t3c2-1 | 25 | IGF1R                       | MODERATE           | c.1172G>A                                                                                                            | p.Arg391His                                                             | 0  | FALSE | chr15:994<br>42775:G:A | 80:chr15:9<br>9442775:G<br>:A | 0.001202 |
| 25_t3c2-1 | 25 | ERBB2;<br>MIEN1;<br>MIR4728 | MODIFIER; MODERATE | c.3160-<br>213A>G;<br>c.3251A>G<br>;<br>c.3296A>G<br>;<br>c.3341A>G<br>;<br>n.3665A>G<br>;<br>c.*388T>C;<br>n.*67A>G | p.Glu1084Gl<br>y;<br>p.Glu1099Gl<br>y;<br>p.Glu1114Gl<br>y              | 1  | FALSE | chr17:378<br>83729:A:G | 80:chr17:3<br>7883729:A<br>:G | 0.001315 |
| 25_t3c2-1 | 25 | NTRK1                       | MODERATE           | c.1478G>A<br>;<br>c.1568G>A<br>;<br>c.1586G>A                                                                        | p.Cys493Tyr<br>;<br>p.Cys523Tyr<br>;<br>p.Cys529Tyr                     | 1  | FALSE | chr1:1568<br>45956:G:A | 80:chr1:15<br>6845956:G<br>:A | 0.001907 |
| 25_t3c2-1 | 25 | DDR2                        | MODERATE           | c.2141G>A                                                                                                            | p.Arg714Gln                                                             | 1  | FALSE | chr1:1627<br>46018:G:A | 80:chr1:16<br>2746018:G<br>:A | 0.001079 |
| 25_t3c2-1 | 25 | PIK3CA                      | MODERATE           | c.1022C>T                                                                                                            | p.Ala341Val                                                             | 2  | FALSE | chr3:1789<br>21540:C:T | 80:chr3:17<br>8921540:C<br>:T | 0.001298 |
| 25_t3c2-1 | 25 | TP53                        | MODERATE           | c.355C>T;<br>c.436C>T;<br>c.715C>T;<br>c.832C>T                                                                      | p.Pro119Ser<br>;<br>p.Pro146Ser<br>;<br>p.Pro239Ser<br>;<br>p.Pro278Ser | 59 | FALSE | chr17:757<br>7106:G:A  | 80:chr17:7<br>577106:G:<br>A  | 0.006601 |
| 25_t3c2-1 | 25 | PDGFRA                      | MODERATE           | c.827C>T                                                                                                             | p.Thr276Me<br>t                                                         | 1  | FALSE | chr4:5513<br>3523:C:T  | 80:chr4:55<br>133523:C:<br>T  | 0.001787 |



|           |    |                   |                    |                                                   |                                                     |   |       |                        |                               |          |
|-----------|----|-------------------|--------------------|---------------------------------------------------|-----------------------------------------------------|---|-------|------------------------|-------------------------------|----------|
| 25_t3c2-1 | 25 | FGFR3             | MODERATE           | c.1526G>A<br>;<br>c.1862G>A<br>;<br>c.1868G>A     | p.Arg509His<br>;<br>p.Arg621His<br>;<br>p.Arg623His | 2 | FALSE | chr4:1807<br>803:G:A   | 80:chr4:18<br>07803:G:A       | 0.002226 |
| 25_t3c2-1 | 25 | DDR2              | MODERATE           | c.1022G>A                                         | p.Arg341Gln                                         | 1 | FALSE | chr1:1627<br>31167:G:A | 80:chr1:16<br>2731167:G<br>:A | 0.000953 |
| 25_t3c2-1 | 25 | ALK               | MODERATE           | c.4192C>T                                         | p.Pro1398Ser                                        | 1 | FALSE | chr2:2941<br>6761:G:A  | 80:chr2:29<br>416761:G:<br>A  | 0.001866 |
| 25_t3c2-1 | 25 | IGF1R             | MODERATE           | c.3799G>A<br>;<br>c.3802G>A                       | p.Glu1267Lys<br>;<br>p.Glu1268Lys                   | 0 | FALSE | chr15:995<br>00369:G:A | 80:chr15:9<br>9500369:G<br>:A | 0.001184 |
| 25_t3c2-1 | 25 | TP53              | MODERATE; MODIFIER | c.230C>T;<br>c.347C>T;<br>c.-279C>T;<br>c.-360C>T | p.Ser77Phe;<br>p.Ser116Phe<br>;                     | 1 | FALSE | chr17:757<br>9340:G:A  | 80:chr17:7<br>579340:G:<br>A  | 0.001181 |
| 25_t3c2-1 | 25 | FBXW7             | MODERATE           | c.1084G>T<br>;<br>c.1198G>T<br>;<br>c.1438G>T     | p.Asp362Tyr<br>;<br>p.Asp400Tyr<br>;<br>p.Asp480Tyr | 0 | FALSE | chr4:1532<br>47364:C:A | 80:chr4:15<br>3247364:C<br>:A | 0.000907 |
| 25_t3c2-1 | 25 | EGFR              | MODERATE           | c.1159C>G                                         | p.Leu387Val                                         | 1 | FALSE | chr7:5522<br>4477:C:G  | 80:chr7:55<br>224477:C:<br>G  | 0.002895 |
| 25_t3c2-1 | 25 | EGFR;<br>EGFR-AS1 | MODERATE; MODIFIER | c.2602G>A<br>; n.-1C>T                            | p.Glu868Lys<br>;                                    | 2 | FALSE | chr7:5525<br>9544:G:A  | 80:chr7:55<br>259544:G:<br>A  | 0.001437 |
| 25_t3c2-1 | 25 | EGFR              | MODERATE           | c.932G>A                                          | p.Cys311Tyr                                         | 1 | FALSE | chr7:5522<br>3565:G:A  | 80:chr7:55<br>223565:G:<br>A  | 0.001135 |
| 25_t3c2-1 | 25 | CTNNB1            | MODERATE           | c.96C>A                                           | p.Asp32Glu                                          | 0 | FALSE | chr3:4126<br>6099:C:A  | 80:chr3:41<br>266099:C:<br>A  | 0.001044 |
| 25_t3c2-1 | 25 | PTEN              | MODERATE           | c.409G>A                                          | p.Ala137Thr                                         | 1 | FALSE | chr10:896<br>92925:G:A | 80:chr10:8<br>9692925:G<br>:A | 0.001072 |
| 25_t3c2-1 | 25 | PHLPP1            | MODERATE           | c.2452G>A                                         | p.Val818Ile                                         | 0 | FALSE | chr18:605<br>70204:G:A | 80:chr18:6<br>0570204:G<br>:A | 0.001046 |
| 25_t3c2-1 | 25 | TP53              | MODERATE; MODIFIER | c.115G>T;<br>c.232G>T;<br>c.-279G>T;<br>c.-360G>T | p.Ala39Ser;<br>p.Ala78Ser;                          | 1 | FALSE | chr17:757<br>9455:C:A  | 80:chr17:7<br>579455:C:<br>A  | 0.001376 |
| 25_t3c2-1 | 25 | PDGFRA            | MODERATE           | c.1516C>A                                         | p.Leu506Ile                                         | 2 | FALSE | chr4:5513<br>9855:C:A  | 80:chr4:55<br>139855:C:<br>A  | 0.001085 |

|           |    |                    |                    |                                                      |                                                           |    |       |                             |                                |          |
|-----------|----|--------------------|--------------------|------------------------------------------------------|-----------------------------------------------------------|----|-------|-----------------------------|--------------------------------|----------|
| 25_t3c2-1 | 25 | TP53               | MODIFIER; MODERATE | c.-5G>T;<br>c.356G>T;<br>c.473G>T;<br>c.77G>T        | ; p.Arg119Leu<br>;<br>; p.Arg158Leu<br>; p.Arg26Leu       | 80 | FALSE | chr17:757<br>8457:C:A       | 80:chr17:7<br>578457:C:<br>A   | 0.001948 |
| 25_t3c2-1 | 25 | TSC2               | HIGH               | c.3280C>T;<br>c.3412C>T                              | p.Arg1094*;<br>p.Arg1138*                                 | 0  | FALSE | chr16:213<br>0180:C:T       | 80:chr16:2<br>130180:C:<br>T   | 0.001507 |
| 25_t3c2-1 | 25 | NTRK2              | MODERATE           | c.1318C>A<br>;<br>c.1357C>A                          | p.Leu440Me<br>t;<br>p.Leu453Me<br>t                       | 0  | FALSE | chr9:8736<br>6961:C:A       | 80:chr9:87<br>366961:C:<br>A   | 0.001099 |
| 25_t3c2-1 | 25 | ESR1               | MODERATE           | c.932C>T;<br>c.935C>T;<br>c.941C>T                   | p.Ala311Val;<br>p.Ala312Val;<br>p.Ala314Val               | 0  | FALSE | chr6:1522<br>65482:C:T      | 80:chr6:15<br>2265482:C:<br>:T | 0.001047 |
| 25_t3c2-1 | 25 | HOXD-AS2;<br>HOXD8 | MODIFIER; MODERATE | n.*692C>T<br>;<br>c.304G>A;<br>c.853G>A;<br>c.856G>A | ; p.Glu102Lys<br>;<br>; p.Glu285Lys<br>;<br>; p.Glu286Lys | 0  | FALSE | chr2:1769<br>96323:G:A      | 80:chr2:17<br>6996323:G<br>:A  | 0.001024 |
| 25_t3c2-1 | 25 | IGF1R              | MODERATE           | c.3637C>A<br>;<br>c.3640C>A                          | p.Gln1213Ly<br>s;<br>p.Gln1214Ly<br>s                     | 0  | FALSE | chr15:994<br>91855:C:A      | 80:chr15:9<br>9491855:C<br>:A  | 0.001752 |
| 25_t3c2-1 | 25 | CDH1               | MODERATE           | c.671G>A                                             | p.Arg224His                                               | 0  | FALSE | chr16:688<br>42735:G:A      | 80:chr16:6<br>8842735:G<br>:A  | 0.001256 |
| 25_t3c2-1 | 25 | ATM                | MODERATE           | c.7328G>A                                            | p.Arg2443Gl<br>n                                          | 0  | FALSE | chr11:108<br>200961:G:<br>A | 80:chr11:1<br>08200961:<br>G:A | 0.002211 |
| 25_t3c2-1 | 25 | CTNNB1             | MODERATE           | c.643G>A                                             | p.Ala215Thr                                               | 0  | FALSE | chr3:4126<br>6972:G:A       | 80:chr3:41<br>266972:G:<br>A   | 0.000973 |
| 25_t3c2-1 | 25 | DDR2               | MODERATE           | c.1598C>A                                            | p.Thr533Lys                                               | 1  | FALSE | chr1:1627<br>41907:C:A      | 80:chr1:16<br>2741907:C<br>:A  | 0.001273 |
| 25_t3c2-1 | 25 | ATM                | MODERATE           | c.8762C>T                                            | p.Thr2921M<br>et                                          | 0  | FALSE | chr11:108<br>224583:C:<br>T | 80:chr11:1<br>08224583:<br>C:T | 0.002729 |
| 25_t3c2-1 | 25 | NTRK3              | MODERATE           | c.333G>T                                             | p.Lys111Asn                                               | 0  | FALSE | chr15:887<br>26711:C:A      | 80:chr15:8<br>8726711:C<br>:A  | 0.002813 |
| 25_t3c2-1 | 25 | GNA11              | MODERATE           | c.1052T>C                                            | p.Leu351Pro                                               | 1  | FALSE | chr19:312<br>1149:T:C       | 80:chr19:3<br>121149:T:<br>C   | 0.001323 |
| 25_t3c2-1 | 25 | NTRK1              | MODERATE           | c.1967G>A<br>;<br>c.2057G>A<br>;<br>c.2075G>A        | p.Arg656His<br>;<br>p.Arg686His<br>;<br>p.Arg692His       | 1  | FALSE | chr1:1568<br>49819:G:A      | 80:chr1:15<br>6849819:G<br>:A  | 0.002366 |

|           |    |        |                    |                                                                                               |                                                                                                                 |   |       |                             |                                |          |
|-----------|----|--------|--------------------|-----------------------------------------------------------------------------------------------|-----------------------------------------------------------------------------------------------------------------|---|-------|-----------------------------|--------------------------------|----------|
| 25_t3c2-1 | 25 | FGFR1  | MODERATE           | c.487C>T;<br>c.493C>T;<br>c.736C>T;<br>c.754C>T;<br>c.760C>T;<br>c.853C>T                     | p.Arg163Trp<br>;<br>p.Arg165Trp<br>;<br>p.Arg246Trp<br>;<br>p.Arg252Trp<br>;<br>p.Arg254Trp<br>;<br>p.Arg285Trp | 1 | FALSE | chr8:3828<br>2203:G:A       | 80:chr8:38<br>282203:G:<br>A   | 0.0012   |
| 25_t3c2-1 | 25 | SMO    | MODERATE           | c.869G>A                                                                                      | p.Arg290His                                                                                                     | 0 | FALSE | chr7:1288<br>45572:G:A      | 80:chr7:12<br>8845572:G:<br>A  | 0.001066 |
| 25_t3c2-1 | 25 | ATM    | HIGH               | c.2558C>A                                                                                     | p.Ser853*                                                                                                       | 0 | FALSE | chr11:108<br>137989:C:<br>A | 80:chr11:1<br>08137989:<br>C:A | 0.001036 |
| 49_c8-1   | 49 | PDGFRA | MODERATE           | c.1516C>A                                                                                     | p.Leu506Ile                                                                                                     | 2 | FALSE | chr4:5513<br>9855:C:A       | 81:chr4:55<br>139855:C:<br>A   | 0.001546 |
| 49_c8-1   | 49 | NOTCH1 | MODERATE           | c.6019G>A                                                                                     | p.Val2007Met                                                                                                    | 0 | FALSE | chr9:1393<br>93627:C:T      | 81:chr9:13<br>9393627:C:<br>T  | 0.001625 |
| 49_c8-1   | 49 | ATM    | HIGH               | c.2156C>A                                                                                     | p.Ser719*                                                                                                       | 0 | FALSE | chr11:108<br>126973:C:<br>A | 81:chr11:1<br>08126973:<br>C:A | 0.001468 |
| 49_c8-1   | 49 | FBXW7  | MODERATE           | c.1186G>T<br>;<br>c.1300G>T<br>;<br>c.1540G>T                                                 | p.Val396Phe<br>;<br>p.Val434Phe<br>;<br>p.Val514Phe                                                             | 0 | FALSE | chr4:1532<br>47262:C:A      | 81:chr4:15<br>3247262:C:<br>A  | 0.001392 |
| 49_c8-1   | 49 | TP53   | MODIFIER; MODERATE | c.*137A>G<br>;<br>c.*225A>G<br>;<br>c.1001A>G<br>;<br>c.1118A>G<br>;<br>c.641A>G;<br>c.722A>G | p.Lys334Arg<br>;<br>p.Lys373Arg<br>;<br>p.Lys214Arg<br>;<br>p.Lys241Arg                                         | 1 | FALSE | chr17:757<br>2991:T:C       | 81:chr17:7<br>572991:T:<br>C   | 0.006283 |
| 49_c8-1   | 49 | CTNNB1 | HIGH               | c.283C>T                                                                                      | p.Arg95*                                                                                                        | 0 | FALSE | chr3:4126<br>6486:C:T       | 81:chr3:41<br>266486:C:<br>T   | 0.001533 |
| 49_c8-1   | 49 | STK11  | HIGH               | c.996G>A                                                                                      | p.Trp332*                                                                                                       | 2 | FALSE | chr19:122<br>3059:G:A       | 81:chr19:1<br>223059:G:<br>A   | 0.001762 |
| 49_c8-1   | 49 | TSC2   | MODIFIER; MODERATE | c.2837+11<br>08G>A;<br>c.2933G>A                                                              | p.Arg978His                                                                                                     | 0 | FALSE | chr16:212<br>7694:G:A       | 81:chr16:2<br>127694:G:<br>A   | 0.001541 |
| 49_c8-1   | 49 | EGFR   | MODIFIER; MODERATE | c.*1464C><br>A;<br>c.1476C>A                                                                  | p.Ser492Arg                                                                                                     | 4 | FALSE | chr7:5522<br>8009:C:A       | 81:chr7:55<br>228009:C:<br>A   | 0.001397 |

|         |    |                    |                            |                                                                           |                                                                                                                 |   |       |                         |                                |          |
|---------|----|--------------------|----------------------------|---------------------------------------------------------------------------|-----------------------------------------------------------------------------------------------------------------|---|-------|-------------------------|--------------------------------|----------|
| 49_c8-1 | 49 | PTEN               | MODERATE                   | c.454C>A                                                                  | p.Leu152Ile                                                                                                     | 1 | FALSE | chr10:896<br>92970:C:A  | 81:chr10:8<br>9692970:C<br>:A  | 0.001582 |
| 49_c8-1 | 49 | IGF1R              | MODERATE                   | c.1511G>A                                                                 | p.Arg504His                                                                                                     | 0 | FALSE | chr15:994<br>54592:G:A  | 81:chr15:9<br>9454592:G<br>:A  | 0.001404 |
| 49_c8-1 | 49 | KDR                | MODERATE                   | c.491G>T                                                                  | p.Arg164Ile                                                                                                     | 1 | FALSE | chr4:5598<br>1208:C:A   | 81:chr4:55<br>981208:C<br>:A   | 0.001639 |
| 49_c8-1 | 49 | NF1                | MODERATE                   | c.3917G>A                                                                 | p.Arg1306Gln                                                                                                    | 2 | FALSE | chr17:295<br>62982:G:A  | 81:chr17:2<br>9562982:G<br>:A  | 0.001018 |
| 49_c8-1 | 49 | IGF1R              | MODERATE                   | c.2380C>T                                                                 | p.Arg794Trp                                                                                                     | 0 | FALSE | chr15:994<br>65555:C:T  | 81:chr15:9<br>9465555:C<br>:T  | 0.001305 |
| 49_c8-1 | 49 | APC                | HIGH                       | c.793C>T;<br>c.847C>T                                                     | p.Arg265*;<br>p.Arg283*                                                                                         | 0 | FALSE | chr5:1121<br>51204:C:T  | 81:chr5:11<br>2151204:C<br>:T  | 0.001626 |
| 49_c8-1 | 49 | FGFR1              | MODERATE                   | c.475C>T;<br>c.481C>T;<br>c.724C>T;<br>c.742C>T;<br>c.748C>T;<br>c.841C>T | p.Arg159Trp<br>;<br>p.Arg161Trp<br>;<br>p.Arg242Trp<br>;<br>p.Arg248Trp<br>;<br>p.Arg250Trp<br>;<br>p.Arg281Trp | 2 | FALSE | chr8:3828<br>2215:G:A   | 81:chr8:38<br>282215:G<br>:A   | 0.001591 |
| 49_c8-1 | 49 | RET                | MODERATE                   | c.2116G>A                                                                 | p.Val706Met                                                                                                     | 2 | FALSE | chr10:436<br>10164:G:A  | 81:chr10:4<br>3610164:G<br>:A  | 0.001232 |
| 49_c8-1 | 49 | ATM                | MODERATE                   | c.6200C>A                                                                 | p.Ala2067Asp                                                                                                    | 0 | FALSE | chr11:108<br>188101:C:A | 81:chr11:1<br>08188101:<br>C:A | 0.003018 |
| 49_c8-1 | 49 | KDR                | MODERATE                   | c.1699G>A                                                                 | p.Val567Met                                                                                                     | 1 | FALSE | chr4:5597<br>1098:C:T   | 81:chr4:55<br>971098:C<br>:T   | 0.001289 |
| 49_c8-1 | 49 | C9orf53;<br>CDKN2A | MODIFIER; MODERATE;<br>LOW | n.*616T>G<br>;<br>c.*120A>C<br>;<br>c.197A>C;<br>c.240A>C                 | p.His66Pro;<br>p.Pro80Pro                                                                                       | 1 | FALSE | chr9:2197<br>1161:T:G   | 81:chr9:21<br>971161:T:<br>G   | 0.031888 |
| 49_c8-1 | 49 | ATM                | HIGH                       | c.7792C>T                                                                 | p.Arg2598*                                                                                                      | 0 | FALSE | chr11:108<br>203492:C:T | 81:chr11:1<br>08203492:<br>C:T | 0.00203  |
| 49_c8-1 | 49 | NTRK1              | MODERATE                   | c.266G>A;<br>c.356G>A                                                     | p.Arg89His;<br>p.Arg119His                                                                                      | 1 | FALSE | chr1:1568<br>34588:G:A  | 81:chr1:15<br>6834588:G<br>:A  | 0.001848 |

|         |    |                |                    |                                                                                                    |                                                                                             |    |       |                     |                        |          |
|---------|----|----------------|--------------------|----------------------------------------------------------------------------------------------------|---------------------------------------------------------------------------------------------|----|-------|---------------------|------------------------|----------|
| 49_c8-1 | 49 | FGFR1          | MODERATE           | c.1013C>T;<br>c.1019C>T;<br>c.1112C>T;<br>c.746C>T;<br>c.752C>T;<br>c.995C>T                       | p.Thr338Met;<br>p.Thr340Met;<br>p.Thr371Met;<br>p.Thr249Met;<br>p.Thr251Met;<br>p.Thr332Met | 2  | FALSE | chr8:38279377:G:A   | 81:chr8:38279377:G:A   | 0.001642 |
| 49_c8-1 | 49 | CSDE1;<br>NRAS | MODIFIER; HIGH     | c.*2430G>T;<br>c.*2523G>T;<br>c.*2817G>T;<br>c.*2910G>T;<br>c.*2964G>T;<br>c.*3057G>T;<br>c.187G>T | ; p.Glu63*                                                                                  | 1  | FALSE | chr1:115256524:C:A  | 81:chr1:115256524:C:A  | 0.001857 |
| 49_c8-1 | 49 | FBXW7          | MODERATE           | c.1444G>T;<br>c.1558G>T;<br>c.1798G>T                                                              | p.Asp482Tyr;<br>p.Asp520Tyr;<br>p.Asp600Tyr                                                 | 0  | FALSE | chr4:153245393:C:A  | 81:chr4:153245393:C:A  | 0.00148  |
| 49_c8-1 | 49 | CTNNB1         | MODERATE           | c.96C>A                                                                                            | p.Asp32Glu                                                                                  | 0  | FALSE | chr3:41266099:C:A   | 81:chr3:41266099:C:A   | 0.001398 |
| 49_c8-1 | 49 | TP53           | MODIFIER; MODERATE | c.-5G>T;<br>c.356G>T;<br>c.473G>T;<br>c.77G>T                                                      | ; p.Arg119Leu;<br>; p.Arg158Leu;<br>; p.Arg26Leu                                            | 80 | FALSE | chr17:7578457:C:A   | 81:chr17:7578457:C:A   | 0.001616 |
| 49_c8-1 | 49 | EGFR           | MODERATE           | c.1789G>A                                                                                          | p.Ala597Thr                                                                                 | 1  | FALSE | chr7:55233039:G:A   | 81:chr7:55233039:G:A   | 0.002581 |
| 49_c8-1 | 49 | ATM            | MODERATE           | c.8228C>T                                                                                          | p.Thr2743Met                                                                                | 0  | FALSE | chr11:108206648:C:T | 81:chr11:108206648:C:T | 0.001336 |
| 49_c8-1 | 49 | FGFR3          | MODIFIER; MODERATE | c.931-398C>A;<br>c.1172C>A;<br>c.1178C>A                                                           | ; p.Ala391Glu;<br>; p.Ala393Glu                                                             | 34 | FALSE | chr4:1806153:C:A    | 81:chr4:1806153:C:A    | 0.002941 |
| 49_c8-1 | 49 | MET            | MODERATE           | c.3583C>A;<br>c.3637C>A                                                                            | p.Leu1195Ile;<br>p.Leu1213Ile                                                               | 1  | FALSE | chr7:116422102:C:A  | 81:chr7:116422102:C:A  | 0.001479 |
| 49_c8-1 | 49 | NOTCH1         | MODERATE           | c.5720C>T                                                                                          | p.Pro1907Leu                                                                                | 0  | FALSE | chr9:139395218:G:A  | 81:chr9:139395218:G:A  | 0.001957 |

|         |    |        |                    |                                                   |                                             |     |       |                        |                                |          |
|---------|----|--------|--------------------|---------------------------------------------------|---------------------------------------------|-----|-------|------------------------|--------------------------------|----------|
| 49_c8-1 | 49 | KDR    | MODERATE           | c.2309G>T                                         | p.Gly770Val                                 | 1   | FALSE | chr4:5596<br>4928:C:A  | 81:chr4:55<br>964928:C:<br>A   | 0.001362 |
| 49_c8-1 | 49 | KDR    | MODERATE           | c.3449G>T                                         | p.Arg1150Ile                                | 1   | FALSE | chr4:5595<br>5096:C:A  | 81:chr4:55<br>955096:C:<br>A   | 0.001397 |
| 49_c8-1 | 49 | FGFR3  | MODERATE           | c.1586A>G;<br>c.1922A>G;<br>c.1928A>G             | p.Asp529Gly;<br>p.Asp641Gly;<br>p.Asp643Gly | 1   | FALSE | chr4:1807<br>863:A:G   | 81:chr4:18<br>07863:A:G        | 0.002788 |
| 49_c8-1 | 49 | TP53   | MODERATE; MODIFIER | c.137C>T;<br>c.254C>T;<br>c.-279C>T;<br>c.-360C>T | p.Pro46Leu;<br>p.Pro85Leu;                  | 1   | FALSE | chr17:757<br>9433:G:A  | 81:chr17:7<br>579433:G:<br>A   | 0.001761 |
| 49_c8-1 | 49 | CTNNB1 | MODERATE           | c.98C>A                                           | p.Ser33Tyr                                  | 0   | FALSE | chr3:4126<br>6101:C:A  | 81:chr3:41<br>266101:C:<br>A   | 0.001377 |
| 49_c8-1 | 49 | NOTCH1 | MODERATE           | c.2644G>A                                         | p.Ala882Thr                                 | 0   | FALSE | chr9:1394<br>05201:C:T | 81:chr9:13<br>9405201:C:<br>:T | 0.002066 |
| 49_c8-1 | 49 | FBXW7  | HIGH               | c.1069G>T;<br>c.1309G>T;<br>c.955G>T              | p.Gly357*;<br>p.Gly437*;<br>p.Gly319*       | 0   | FALSE | chr4:1532<br>49469:C:A | 81:chr4:15<br>3249469:C:<br>:A | 0.001453 |
| 49_c8-1 | 49 | FBXW7  | HIGH               | c.1027G>T;<br>c.1267G>T;<br>c.913G>T              | p.Gly343*;<br>p.Gly423*;<br>p.Gly305*       | 0   | FALSE | chr4:1532<br>49511:C:A | 81:chr4:15<br>3249511:C:<br>:A | 0.001565 |
| 49_c8-1 | 49 | NOTCH1 | MODERATE           | c.2860T>C                                         | p.Cys954Arg                                 | 0   | FALSE | chr9:1394<br>04294:A:G | 81:chr9:13<br>9404294:A:<br>:G | 0.001685 |
| 49_c8-1 | 49 | TP53   | MODIFIER; MODERATE | c.-9G>T;<br>c.352G>T;<br>c.469G>T;<br>c.73G>T     | p.Val118Phe;<br>p.Val157Phe;<br>p.Val25Phe  | 169 | FALSE | chr17:757<br>8461:C:A  | 81:chr17:7<br>578461:C:<br>A   | 0.00237  |
| 49_c8-1 | 49 | KDR    | MODERATE           | c.3311C>T                                         | p.Ser1104Phe                                | 1   | FALSE | chr4:5595<br>5634:G:A  | 81:chr4:55<br>955634:G:<br>A   | 0.001395 |
| 49_c8-1 | 49 | NTRK3  | MODERATE           | c.1463C>T;<br>c.1487C>T                           | p.Ala488Val;<br>p.Ala496Val                 | 0   | FALSE | chr15:885<br>76186:G:A | 81:chr15:8<br>8576186:G:<br>:A | 0.002828 |
| 49_c8-1 | 49 | NOTCH1 | MODERATE           | c.2528A>G                                         | p.Glu843Gly                                 | 0   | FALSE | chr9:1394<br>05663:T:C | 81:chr9:13<br>9405663:T:<br>:C | 0.238698 |

|         |    |                                      |                    |                                             |                                                |      |       |                             |                                |          |
|---------|----|--------------------------------------|--------------------|---------------------------------------------|------------------------------------------------|------|-------|-----------------------------|--------------------------------|----------|
| 49_c8-1 | 49 | FBXW7                                | MODERATE           | c.232A>T;<br>c.346A>T;<br>c.586A>T          | p.Thr78Ser;<br>p.Thr116Ser<br>;<br>p.Thr196Ser | 0    | FALSE | chr4:1532<br>68222:T:A      | 81:chr4:15<br>3268222:T<br>:A  | 0.00194  |
| 49_c8-1 | 49 | PDGFRA                               | MODERATE           | c.1495G>A                                   | p.Val499Me<br>t                                | 2    | FALSE | chr4:5513<br>9834:G:A       | 81:chr4:55<br>139834:G:<br>A   | 0.002234 |
| 49_c8-1 | 49 | MIR4674;<br>MIR4674H<br>G;<br>NOTCH1 | MODIFIER; MODERATE | n.*87G>T;<br>n.-1C>A;<br>c.62G>T            | ; p.Gly21Val                                   | 0    | FALSE | chr9:1394<br>38554:C:A      | 81:chr9:13<br>9438554:C<br>:A  | 0.002837 |
| 49_c8-1 | 49 | EGFR                                 | MODERATE           | c.1774G>A                                   | p.Val592Ile                                    | 1    | FALSE | chr7:5523<br>3024:G:A       | 81:chr7:55<br>233024:G:<br>A   | 0.002418 |
| 49_c8-1 | 49 | FBXW7                                | MODERATE           | c.1088C>T;<br>c.1202C>T;<br>c.1442C>T       | p.Ala363Val;<br>p.Ala401Val;<br>p.Ala481Val    | 0    | FALSE | chr4:1532<br>47360:G:A      | 81:chr4:15<br>3247360:G<br>:A  | 0.001267 |
| 49_c8-1 | 49 | EGFR;<br>EGFR-AS1                    | LOW; MODIFIER      | c.2472C>A<br>; n.-1G>T                      | p.Gly824Gly<br>;                               | 1    | FALSE | chr7:5525<br>9414:C:A       | 81:chr7:55<br>259414:C:<br>A   | 0.002008 |
| 49_c8-1 | 49 | TSC2                                 | MODERATE           | c.1381G>A                                   | p.Val461Me<br>t                                | 0    | FALSE | chr16:211<br>2992:G:A       | 81:chr16:2<br>112992:G:<br>A   | 0.001664 |
| 49_c8-1 | 49 | IDH2                                 | LOW; MODIFIER      | c.-4G>T; c.-<br>17-<br>2860G>T;<br>c.153G>T | ; p.Val51Val                                   | 1    | FALSE | chr15:906<br>34839:C:A      | 81:chr15:9<br>0634839:C<br>:A  | 0.002899 |
| 49_c8-1 | 49 | PTEN                                 | MODERATE           | c.923G>A                                    | p.Arg308His                                    | 1    | FALSE | chr10:897<br>20772:G:A      | 81:chr10:8<br>9720772:G<br>:A  | 0.001812 |
| 49_c8-1 | 49 | NTRK2                                | MODERATE           | c.1960C>A<br>;<br>c.2008C>A                 | p.Leu654Me<br>t;<br>p.Leu670Me<br>t            | 0    | FALSE | chr9:8757<br>0268:C:A       | 81:chr9:87<br>570268:C:<br>A   | 0.002318 |
| 49_c8-1 | 49 | EGFR                                 | MODERATE           | c.1841G>A                                   | p.Gly614Asp                                    | 1    | FALSE | chr7:5523<br>3091:G:A       | 81:chr7:55<br>233091:G:<br>A   | 0.00369  |
| 49_c8-1 | 49 | PDGFRA                               | MODERATE           | c.1526C>A                                   | p.Ala509Asp                                    | 1    | FALSE | chr4:5513<br>9865:C:A       | 81:chr4:55<br>139865:C:<br>A   | 0.003051 |
| 49_c8-1 | 49 | FGFR4                                | MODIFIER; MODERATE | c.1058-<br>174G>A;<br>c.1078G>A             | ; p.Ala360Thr                                  | 1    | FALSE | chr5:1765<br>20159:G:A      | 81:chr5:17<br>6520159:G<br>:A  | 0.00144  |
| 49_c8-1 | 49 | IDH1                                 | MODERATE           | c.395G>A                                    | p.Arg132His                                    | 4157 | FALSE | chr2:2091<br>13112:C:T      | 81:chr2:20<br>9113112:C<br>:T  | 0.002484 |
| 49_c8-1 | 49 | ATM                                  | MODERATE           | c.7328G>A                                   | p.Arg2443Gl<br>n                               | 0    | FALSE | chr11:108<br>200961:G:<br>A | 81:chr11:1<br>08200961:<br>G:A | 0.001499 |
| 49_c8-1 | 49 | KIT                                  | MODERATE           | c.2329G>A<br>;<br>c.2341G>A                 | p.Ala777Thr<br>;<br>p.Ala781Thr                | 1    | FALSE | chr4:5559<br>8144:G:A       | 81:chr4:55<br>598144:G:<br>A   | 0.001828 |

|         |    |                   |                            |                                                |                                                                |    |       |                        |                                |          |
|---------|----|-------------------|----------------------------|------------------------------------------------|----------------------------------------------------------------|----|-------|------------------------|--------------------------------|----------|
| 49_c8-1 | 49 | EPHA3             | MODERATE                   | c.1379C>A                                      | p.Pro460His                                                    | 0  | FALSE | chr3:8944<br>5059:C:A  | 81:chr3:89<br>445059:C:<br>A   | 0.00165  |
| 49_c8-1 | 49 | CTNNB1            | MODERATE                   | c.1723G>A                                      | p.Gly575Arg                                                    | 0  | FALSE | chr3:4127<br>7254:G:A  | 81:chr3:41<br>277254:G:<br>A   | 0.002018 |
| 49_c8-1 | 49 | KIT               | MODERATE                   | c.1485C>A                                      | p.Asn495Lys                                                    | 1  | FALSE | chr4:5559<br>2161:C:A  | 81:chr4:55<br>592161:C:<br>A   | 0.001538 |
| 49_c8-1 | 49 | EPHA3             | HIGH                       | c.2757G>A                                      | p.Trp919*                                                      | 0  | FALSE | chr3:8952<br>1680:G:A  | 81:chr3:89<br>521680:G:<br>A   | 0.001376 |
| 49_c8-1 | 49 | TP53              | LOW; MODIFIER;<br>MODERATE | c.-6C>T;<br>c.355C>T;<br>c.472C>T;<br>c.76C>T  | p.Arg119Cys<br>;<br>p.Arg158Cys<br>; p.Arg26Cys                | 17 | FALSE | chr17:757<br>8458:G:A  | 81:chr17:7<br>578458:G:<br>A   | 0.001606 |
| 49_c8-1 | 49 | NOTCH1            | MODERATE                   | c.3407G>T                                      | p.Gly1136Val                                                   | 0  | FALSE | chr9:1394<br>02510:C:A | 81:chr9:13<br>9402510:C:<br>:A | 0.002806 |
| 49_c8-1 | 49 | KRAS              | HIGH                       | c.292G>T                                       | p.Glu98*                                                       | 1  | FALSE | chr12:253<br>78706:C:A | 81:chr12:2<br>5378706:C:<br>:A | 0.001833 |
| 49_c8-1 | 49 | CDH1              | MODERATE                   | c.294C>A                                       | p.Phe98Leu                                                     | 0  | FALSE | chr16:688<br>35703:C:A | 81:chr16:6<br>8835703:C:<br>:A | 0.00148  |
| 49_c8-1 | 49 | IGF1R             | MODERATE                   | c.167A>G                                       | p.Glu56Gly                                                     | 0  | FALSE | chr15:992<br>50863:A:G | 81:chr15:9<br>9250863:A:<br>:G | 0.002143 |
| 49_c8-1 | 49 | MET               | MODERATE                   | c.608C>A                                       | p.Ser203Tyr                                                    | 1  | FALSE | chr7:1163<br>39746:C:A | 81:chr7:11<br>6339746:C:<br>:A | 0.001383 |
| 82_c3-1 | 82 | NOTCH1            | MODERATE                   | c.6019G>A                                      | p.Val200Met                                                    | 0  | FALSE | chr9:1393<br>93627:C:T | 82:chr9:13<br>9393627:C:<br>:T | 0.002978 |
| 82_c3-1 | 82 | PIK3CA            | MODERATE                   | c.1645G>A                                      | p.Asp549Asn                                                    | 4  | FALSE | chr3:1789<br>36103:G:A | 82:chr3:17<br>8936103:G:<br>:A | 0.001829 |
| 82_c3-1 | 82 | ALK               | MODERATE                   | c.2629G>T                                      | p.Ala877Ser                                                    | 1  | FALSE | chr2:2945<br>5173:C:A  | 82:chr2:29<br>455173:C:<br>:A  | 0.001619 |
| 82_c3-1 | 82 | FBXW7             | HIGH                       | c.1027G>T<br>;<br>c.1267G>T<br>;<br>c.913G>T   | p.Gly343*;<br>p.Gly423*;<br>p.Gly305*                          | 0  | FALSE | chr4:1532<br>49511:C:A | 82:chr4:15<br>3249511:C:<br>:A | 0.002408 |
| 82_c3-1 | 82 | TP53              | MODERATE                   | c.134C>A;<br>c.413C>A;<br>c.530C>A;<br>c.53C>A | p.Pro45His;<br>p.Pro138His<br>;<br>p.Pro177His<br>; p.Pro18His | 20 | FALSE | chr17:757<br>8400:G:T  | 82:chr17:7<br>578400:G:<br>T   | 0.002481 |
| 82_c3-1 | 82 | EGFR;<br>EGFR-AS1 | MODERATE; MODIFIER         | c.2327G>A<br>;<br>n.1235C>T                    | p.Arg776His<br>;                                               | 7  | FALSE | chr7:5524<br>9029:G:A  | 82:chr7:55<br>249029:G:<br>A   | 0.001464 |



|         |    |                                      |                    |                                                                                                                                                           |                                                                                                                                                              |    |       |                             |                                |          |
|---------|----|--------------------------------------|--------------------|-----------------------------------------------------------------------------------------------------------------------------------------------------------|--------------------------------------------------------------------------------------------------------------------------------------------------------------|----|-------|-----------------------------|--------------------------------|----------|
| 82_c3-1 | 82 | MET                                  | MODERATE           | c.1450C>A                                                                                                                                                 | p.His484Asn                                                                                                                                                  | 1  | FALSE | chr7:1163<br>80061:C:A      | 82:chr7:11<br>6380061:C<br>:A  | 0.001232 |
| 82_c3-1 | 82 | NTRK2                                | MODERATE           | c.250G>A                                                                                                                                                  | p.Glu84Lys                                                                                                                                                   | 0  | FALSE | chr9:8731<br>7111:G:A       | 82:chr9:87<br>317111:G:<br>A   | 0.001275 |
| 82_c3-1 | 82 | FGFR3                                | MODERATE           | c.1162G>A<br>;<br>c.1498G>A<br>;<br>c.1504G>A                                                                                                             | p.Ala388Thr<br>;<br>p.Ala500Thr<br>;<br>p.Ala502Thr                                                                                                          | 1  | FALSE | chr4:1807<br>167:G:A        | 82:chr4:18<br>07167:G:A        | 0.001898 |
| 82_c3-1 | 82 | FGFR2                                | MODERATE; MODIFIER | c.1357G>C<br>;<br>c.1360G>C<br>;<br>c.1363G>C<br>;<br>c.1372G>C<br>;<br>c.1441G>C<br>;<br>c.1444G>C<br>;<br>c.1708G>C<br>;<br>c.1711G>C<br>;<br>n.2158G>C | p.Gly453Arg<br>;<br>p.Gly454Arg<br>;<br>p.Gly455Arg<br>;<br>p.Gly458Arg<br>;<br>p.Gly481Arg<br>;<br>p.Gly482Arg<br>;<br>p.Gly570Arg<br>;<br>p.Gly571Arg<br>; | 1  | FALSE | chr10:123<br>256201:C:<br>G | 82:chr10:1<br>23256201:<br>C:G | 0.001786 |
| 82_c3-1 | 82 | PIK3CA                               | MODERATE           | c.892C>A                                                                                                                                                  | p.Pro298Thr                                                                                                                                                  | 1  | FALSE | chr3:1789<br>21410:C:A      | 82:chr3:17<br>8921410:C<br>:A  | 0.001144 |
| 82_c3-1 | 82 | TP53                                 | MODIFIER; MODERATE | c.-3G>T;<br>;<br>c.358G>T;<br>;<br>c.475G>T;<br>;<br>c.79G>T                                                                                              | p.Ala120Ser;<br>;<br>p.Ala159Ser;<br>;<br>p.Ala27Ser                                                                                                         | 23 | FALSE | chr17:757<br>8455:C:A       | 82:chr17:7<br>578455:C:<br>A   | 0.003436 |
| 82_c3-1 | 82 | ATM                                  | MODERATE           | c.6200C>A                                                                                                                                                 | p.Ala2067As<br>p                                                                                                                                             | 0  | FALSE | chr11:108<br>188101:C:<br>A | 82:chr11:1<br>08188101:<br>C:A | 0.003018 |
| 82_c3-1 | 82 | TSC2                                 | MODERATE           | c.1654G>A                                                                                                                                                 | p.Ala552Thr                                                                                                                                                  | 0  | FALSE | chr16:211<br>115574:G:A     | 82:chr16:2<br>115574:G:<br>A   | 0.002876 |
| 82_c3-1 | 82 | FBXW7                                | MODERATE           | c.1384C>T;<br>;<br>c.1498C>T;<br>;<br>c.1738C>T                                                                                                           | p.His462Tyr;<br>;<br>p.His500Tyr;<br>;<br>p.His580Tyr                                                                                                        | 0  | FALSE | chr4:1532<br>45453:G:A      | 82:chr4:15<br>3245453:G<br>:A  | 0.001494 |
| 82_c3-1 | 82 | MIR4674;<br>MIR4674H<br>G;<br>NOTCH1 | MODIFIER; MODERATE | n.*87G>T;<br>;<br>n.-1C>A;<br>;<br>c.62G>T                                                                                                                | p.Gly21Val                                                                                                                                                   | 0  | FALSE | chr9:1394<br>38554:C:A      | 82:chr9:13<br>9438554:C<br>:A  | 0.004104 |
| 82_c3-1 | 82 | CDKN2A                               | MODIFIER; MODERATE | c.194-<br>3571G>A;<br>;<br>c.49G>A                                                                                                                        | p.Ala17Thr                                                                                                                                                   | 1  | FALSE | chr9:2197<br>4778:C:T       | 82:chr9:21<br>974778:C:<br>T   | 0.00188  |

|         |    |                                 |                    |                                                                                                                                                           |                                                                                                                                                              |   |       |                             |                                |          |
|---------|----|---------------------------------|--------------------|-----------------------------------------------------------------------------------------------------------------------------------------------------------|--------------------------------------------------------------------------------------------------------------------------------------------------------------|---|-------|-----------------------------|--------------------------------|----------|
| 82_c3-1 | 82 | EGFR                            | MODERATE           | c.493C>T                                                                                                                                                  | p.Arg165Trp                                                                                                                                                  | 1 | FALSE | chr7:5521<br>4367:C:T       | 82:chr7:55<br>214367:C:<br>T   | 0.001579 |
| 82_c3-1 | 82 | RPL19                           | MODERATE           | c.320G>A                                                                                                                                                  | p.Arg107Lys                                                                                                                                                  | 0 | FALSE | chr17:373<br>59326:G:A      | 82:chr17:3<br>7359326:G<br>:A  | 0.001148 |
| 82_c3-1 | 82 | FBXW7                           | HIGH               | c.1057G>T<br>;<br>c.1171G>T<br>;<br>c.1411G>T                                                                                                             | p.Glu353*;<br>p.Glu391*;<br>p.Glu471*                                                                                                                        | 0 | FALSE | chr4:1532<br>49367:C:A      | 82:chr4:15<br>3249367:C<br>:A  | 0.001505 |
| 82_c3-1 | 82 | EPHA3                           | MODERATE           | c.1543G>A                                                                                                                                                 | p.Ala515Thr                                                                                                                                                  | 0 | FALSE | chr3:8944<br>8579:G:A       | 82:chr3:89<br>448579:G:<br>A   | 0.003035 |
| 82_c3-1 | 82 | CTNNB1                          | MODERATE           | c.86C>A                                                                                                                                                   | p.Ser29Tyr                                                                                                                                                   | 0 | FALSE | chr3:4126<br>6089:C:A       | 82:chr3:41<br>266089:C:<br>A   | 0.001488 |
| 82_c3-1 | 82 | FGFR2                           | MODERATE; MODIFIER | c.1859G>T<br>;<br>c.1862G>T<br>;<br>c.1865G>T<br>;<br>c.1874G>T<br>;<br>c.1943G>T<br>;<br>c.1946G>T<br>;<br>c.2210G>T<br>;<br>c.2213G>T<br>;<br>n.2660G>T | p.Arg620Me<br>t;<br>p.Arg621Me<br>t;<br>p.Arg622Me<br>t;<br>p.Arg625Me<br>t;<br>p.Arg648Me<br>t;<br>p.Arg649Me<br>t;<br>p.Arg737Me<br>t;<br>p.Arg738Me<br>t; | 1 | FALSE | chr10:123<br>243303:C:<br>A | 82:chr10:1<br>23243303:<br>C:A | 0.001641 |
| 82_c3-1 | 82 | ERBB2;<br>MIEN1;<br>MIR4728     | MODERATE; MODIFIER | c.2720A>G<br>;<br>c.2765A>G<br>;<br>c.2810A>G<br>;<br>n.3134A>G<br>;<br>c.*388T>C;<br>n.-1A>G                                                             | p.Lys907Arg<br>;<br>p.Lys922Arg<br>;<br>p.Lys937Arg<br>;                                                                                                     | 1 | FALSE | chr17:378<br>82044:A:G      | 82:chr17:3<br>7882044:A<br>:G  | 0.001516 |
| 82_c3-1 | 82 | FOXL2;<br>FOXL2NB;<br>LINC01391 | MODERATE; MODIFIER | c.433C>T;<br>c.-132G>A;<br>n.-1C>T                                                                                                                        | p.Arg145Cys<br>;                                                                                                                                             | 0 | FALSE | chr3:1386<br>65132:G:A      | 82:chr3:13<br>8665132:G<br>:A  | 0.002903 |
| 82_c3-1 | 82 | FLT3                            | MODERATE           | c.2669C>T                                                                                                                                                 | p.Pro890Leu                                                                                                                                                  | 0 | FALSE | chr13:285<br>89378:G:A      | 82:chr13:2<br>8589378:G<br>:A  | 0.001508 |
| 82_c3-1 | 82 | PTEN                            | HIGH               | c.633C>A                                                                                                                                                  | p.Cys211*                                                                                                                                                    | 2 | FALSE | chr10:897<br>12015:C:A      | 82:chr10:8<br>9712015:C<br>:A  | 0.004049 |
| 82_c3-1 | 82 | STK11                           | LOW                | c.462C>T                                                                                                                                                  | p.His154His                                                                                                                                                  | 1 | FALSE | chr19:121<br>9410:C:T       | 82:chr19:1<br>219410:C:<br>T   | 0.002445 |

|         |    |        |                |                                                                                  |                                                                                                            |      |       |                        |                               |          |
|---------|----|--------|----------------|----------------------------------------------------------------------------------|------------------------------------------------------------------------------------------------------------|------|-------|------------------------|-------------------------------|----------|
| 82_c3-1 | 82 | APC    | MODERATE       | c.1864C>T;<br>; c.1918C>T                                                        | p.Arg622Trp<br>; p.Arg640Trp                                                                               | 0    | FALSE | chr5:1121<br>70822:C:T | 82:chr5:11<br>2170822:C<br>:T | 0.001386 |
| 82_c3-1 | 82 | FGFR1  | MODERATE       | c.292C>T;<br>c.298C>T;<br>c.541C>T;<br>c.559C>T;<br>c.565C>T;<br>c.658C>T        | p.Arg98Cys;<br>p.Arg100Cys<br>;<br>p.Arg181Cys<br>;<br>p.Arg187Cys<br>;<br>p.Arg189Cys<br>;<br>p.Arg220Cys | 1    | FALSE | chr8:3828<br>5495:G:A  | 82:chr8:38<br>285495:G:<br>A  | 0.001411 |
| 82_c3-1 | 82 | PIK3CA | MODERATE       | c.35G>A                                                                          | p.Gly12Asp                                                                                                 | 5    | FALSE | chr3:1789<br>16648:G:A | 82:chr3:17<br>8916648:G<br>:A | 0.000948 |
| 82_c3-1 | 82 | FLT3   | MODERATE       | c.2546G>A                                                                        | p.Arg849His                                                                                                | 0    | FALSE | chr13:285<br>89834:C:T | 82:chr13:2<br>8589834:C<br>:T | 0.002774 |
| 82_c3-1 | 82 | CTNNB1 | MODERATE       | c.884C>A                                                                         | p.Ala295Asp                                                                                                | 0    | FALSE | chr3:4126<br>7300:C:A  | 82:chr3:41<br>267300:C:<br>A  | 0.001627 |
| 82_c3-1 | 82 | PIK3CA | MODERATE       | c.1633G>A                                                                        | p.Glu545Lys                                                                                                | 1189 | FALSE | chr3:1789<br>36091:G:A | 82:chr3:17<br>8936091:G<br>:A | 0.114121 |
| 82_c3-1 | 82 | KDR    | MODERATE       | c.2158C>T                                                                        | p.Arg720Trp                                                                                                | 1    | FALSE | chr4:5596<br>8172:G:A  | 82:chr4:55<br>968172:G:<br>A  | 0.001334 |
| 82_c3-1 | 82 | TP53   | MODERATE       | c.337G>A;<br>c.418G>A;<br>c.697G>A;<br>c.814G>A                                  | p.Val113Me<br>t;<br>p.Val140Me<br>t;<br>p.Val233Me<br>t;<br>p.Val272Me<br>t                                | 85   | FALSE | chr17:757<br>7124:C:T  | 82:chr17:7<br>577124:C:<br>T  | 0.013261 |
| 82_c3-1 | 82 | PIK3CA | MODERATE       | c.3001C>A                                                                        | p.Leu1001I<br>lle                                                                                          | 3    | FALSE | chr3:1789<br>51946:C:A | 82:chr3:17<br>8951946:C<br>:A | 0.001029 |
| 82_c3-1 | 82 | PIK3CA | MODERATE       | c.518C>A                                                                         | p.Ser173Tyr                                                                                                | 1    | FALSE | chr3:1789<br>17643:C:A | 82:chr3:17<br>8917643:C<br>:A | 0.001097 |
| 82_c3-1 | 82 | TP53   | MODIFIER; HIGH | c.*113G>T<br>; c.*25G>T;<br>c.1006G>T<br>;<br>c.529G>T;<br>c.610G>T;<br>c.889G>T | p.Glu336*;<br>p.Glu177*;<br>p.Glu204*;<br>p.Glu297*                                                        | 7    | FALSE | chr17:757<br>4021:C:A  | 82:chr17:7<br>574021:C:<br>A  | 0.001396 |

|         |    |        |                            |                                                                                               |                                                                                 |     |       |                             |                                |          |
|---------|----|--------|----------------------------|-----------------------------------------------------------------------------------------------|---------------------------------------------------------------------------------|-----|-------|-----------------------------|--------------------------------|----------|
| 82_c3-1 | 82 | TP53   | LOW; MODIFIER;<br>MODERATE | c.-6C>T;<br>c.355C>T;<br>c.472C>T;<br>c.76C>T                                                 | ; p.Arg119Cys<br>;<br>; p.Arg158Cys<br>; p.Arg26Cys                             | 17  | FALSE | chr17:757<br>8458:G:A       | 82:chr17:7<br>578458:G:<br>A   | 0.001744 |
| 82_c3-1 | 82 | TP53   | MODIFIER; MODERATE         | c.*137A>G<br>;<br>c.*225A>G<br>;<br>c.1001A>G<br>;<br>c.1118A>G<br>;<br>c.641A>G;<br>c.722A>G | ; p.Lys334Arg<br>;<br>; p.Lys373Arg<br>;<br>; p.Lys214Arg<br>;<br>; p.Lys241Arg | 1   | FALSE | chr17:757<br>2991:T:C       | 82:chr17:7<br>572991:T:<br>C   | 0.002384 |
| 82_c3-1 | 82 | PTEN   | HIGH                       | c.1003C>T                                                                                     | p.Arg335*                                                                       | 27  | FALSE | chr10:897<br>20852:C:T      | 82:chr10:8<br>9720852:C<br>:T  | 0.002551 |
| 82_c3-1 | 82 | TP53   | HIGH                       | c.109C>T;<br>c.190C>T;<br>c.469C>T;<br>c.586C>T                                               | p.Arg37*;<br>p.Arg64*;<br>p.Arg157*;<br>p.Arg196*                               | 191 | FALSE | chr17:757<br>8263:G:A       | 82:chr17:7<br>578263:G:<br>A   | 0.134467 |
| 82_c3-1 | 82 | BRAF   | MODERATE                   | c.1385G>T                                                                                     | p.Arg462Ile                                                                     | 2   | FALSE | chr7:1404<br>81423:C:A      | 82:chr7:14<br>0481423:C<br>:A  | 0.001286 |
| 82_c3-1 | 82 | AR     | MODERATE                   | c.1847G>A<br>; c.251G>A                                                                       | p.Arg616His<br>; p.Arg84His                                                     | 0   | FALSE | chrX:6690<br>5930:G:A       | 82:chrX:66<br>905930:G:<br>A   | 0.001509 |
| 82_c3-1 | 82 | NF1    | MODERATE                   | c.7381G>A<br>;<br>c.7444G>A                                                                   | p.Asp2461A<br>sn;<br>p.Asp2482A<br>sn                                           | 1   | FALSE | chr17:296<br>77323:G:A      | 82:chr17:2<br>9677323:G<br>:A  | 0.001656 |
| 82_c3-1 | 82 | AR     | MODERATE                   | c.1846C>T;<br>c.250C>T                                                                        | p.Arg616Cys<br>; p.Arg84Cys                                                     | 0   | FALSE | chrX:6690<br>5929:C:T       | 82:chrX:66<br>905929:C:<br>T   | 0.001511 |
| 82_c3-1 | 82 | PIK3R1 | MODERATE                   | c.1082G>A<br>;<br>c.1271G>A<br>;<br>c.1361G>A<br>;<br>c.2171G>A                               | p.Arg361Gln<br>;<br>p.Arg424Gln<br>;<br>p.Arg454Gln<br>;<br>p.Arg724Gln         | 1   | FALSE | chr5:6759<br>3425:G:A       | 82:chr5:67<br>593425:G:<br>A   | 0.001805 |
| 82_c3-1 | 82 | ATM    | MODERATE                   | c.8558C>T                                                                                     | p.Thr2853M<br>et                                                                | 0   | FALSE | chr11:108<br>216609:C:<br>T | 82:chr11:1<br>08216609:<br>C:T | 0.001529 |
| 82_c3-1 | 82 | TP53   | MODERATE; MODIFIER         | c.158C>T;<br>c.275C>T;<br>c.-279C>T;<br>c.-360C>T                                             | p.Pro53Leu;<br>p.Pro92Leu;                                                      | 1   | FALSE | chr17:757<br>9412:G:A       | 82:chr17:7<br>579412:G:<br>A   | 0.001848 |

|         |    |                   |                    |                                                                                                                                                           |                                                                                                                              |   |       |                             |                                |          |
|---------|----|-------------------|--------------------|-----------------------------------------------------------------------------------------------------------------------------------------------------------|------------------------------------------------------------------------------------------------------------------------------|---|-------|-----------------------------|--------------------------------|----------|
| 82_c3-1 | 82 | ALK               | MODERATE           | c.1669C>T                                                                                                                                                 | p.Arg557Cys                                                                                                                  | 1 | FALSE | chr2:2951<br>9902:G:A       | 82:chr2:29<br>519902:G:<br>A   | 0.001291 |
| 82_c3-1 | 82 | STK11             | MODERATE           | c.488G>A                                                                                                                                                  | p.Gly163Asp                                                                                                                  | 1 | FALSE | chr19:122<br>0395:G:A       | 82:chr19:1<br>220395:G:<br>A   | 0.002554 |
| 82_c3-1 | 82 | FBXW7             | MODERATE           | c.289G>A;<br>c.403G>A;<br>c.643G>A                                                                                                                        | p.Ala97Thr;<br>p.Ala135Thr<br>;<br>p.Ala215Thr                                                                               | 0 | FALSE | chr4:1532<br>68165:C:T      | 82:chr4:15<br>3268165:C<br>:T  | 0.001078 |
| 82_c3-1 | 82 | TP53              | MODERATE; MODIFIER | c.115G>T;<br>c.232G>T;<br>c.-279G>T;<br>c.-360G>T                                                                                                         | p.Ala39Ser;<br>p.Ala78Ser;                                                                                                   | 1 | FALSE | chr17:757<br>9455:C:A       | 82:chr17:7<br>579455:C:<br>A   | 0.001808 |
| 82_c3-1 | 82 | GNA11             | MODERATE           | c.440G>A                                                                                                                                                  | p.Arg147His                                                                                                                  | 1 | FALSE | chr19:311<br>3446:G:A       | 82:chr19:3<br>113446:G:<br>A   | 0.001617 |
| 82_c3-1 | 82 | NOTCH1            | MODERATE           | c.5885G>A                                                                                                                                                 | p.Arg1962His                                                                                                                 | 0 | FALSE | chr9:1393<br>95053:C:T      | 82:chr9:13<br>9395053:C<br>:T  | 0.002679 |
| 77_c2-2 | 77 | EGFR;<br>EGFR-AS1 | MODERATE; MODIFIER | c.2356G>A<br>;<br>n.1206C>T                                                                                                                               | p.Val786Met;                                                                                                                 | 6 | FALSE | chr7:5524<br>9058:G:A       | 83:chr7:55<br>249058:G:<br>A   | 0.001064 |
| 77_c2-2 | 77 | NOTCH1            | MODERATE           | c.4549G>A                                                                                                                                                 | p.Asp1517Asn                                                                                                                 | 0 | FALSE | chr9:1393<br>99799:C:T      | 83:chr9:13<br>9399799:C<br>:T  | 0.001116 |
| 77_c2-2 | 77 | FLT3              | HIGH               | c.2749G>T                                                                                                                                                 | p.Glu917*                                                                                                                    | 0 | FALSE | chr13:285<br>89298:C:A      | 83:chr13:2<br>8589298:C<br>:A  | 0.001133 |
| 77_c2-2 | 77 | PDGFRA            | MODERATE           | c.1526C>A                                                                                                                                                 | p.Ala509Asp                                                                                                                  | 1 | FALSE | chr4:5513<br>9865:C:A       | 83:chr4:55<br>139865:C:<br>A   | 0.001783 |
| 77_c2-2 | 77 | EGFR              | MODERATE           | c.940G>A                                                                                                                                                  | p.Asp314Asn                                                                                                                  | 1 | FALSE | chr7:5522<br>3573:G:A       | 83:chr7:55<br>223573:G:<br>A   | 0.001015 |
| 77_c2-2 | 77 | FGFR2             | MODERATE; MODIFIER | c.1397G>T<br>;<br>c.1400G>T<br>;<br>c.1403G>T<br>;<br>c.1412G>T<br>;<br>c.1481G>T<br>;<br>c.1484G>T<br>;<br>c.1748G>T<br>;<br>c.1751G>T<br>;<br>n.2198G>T | p.Gly466Val;<br>p.Gly467Val;<br>p.Gly468Val;<br>p.Gly471Val;<br>p.Gly494Val;<br>p.Gly495Val;<br>p.Gly583Val;<br>p.Gly584Val; | 1 | FALSE | chr10:123<br>256161:C:<br>A | 83:chr10:1<br>23256161:<br>C:A | 0.001886 |
| 77_c2-2 | 77 | RET               | MODERATE           | c.1907C>T                                                                                                                                                 | p.Thr636Met                                                                                                                  | 1 | FALSE | chr10:436<br>09955:C:T      | 83:chr10:4<br>3609955:C<br>:T  | 0.001337 |

|         |    |                   |                    |                                                                           |                                                                                             |    |       |                    |                       |          |
|---------|----|-------------------|--------------------|---------------------------------------------------------------------------|---------------------------------------------------------------------------------------------|----|-------|--------------------|-----------------------|----------|
| 77_c2-2 | 77 | IGF1R             | MODERATE           | c.3905T>C;<br>c.3908T>C                                                   | p.Val1302Ala;<br>p.Val1303Ala                                                               | 0  | FALSE | chr15:99500475:T:C | 83:chr15:99500475:T:C | 0.001785 |
| 77_c2-2 | 77 | IGF1R             | MODERATE           | c.2824G>A;<br>c.2827G>A                                                   | p.Ala942Thr;<br>p.Ala943Thr                                                                 | 0  | FALSE | chr15:99472831:G:A | 83:chr15:99472831:G:A | 0.001001 |
| 77_c2-2 | 77 | NF1               | MODERATE           | c.2695T>G                                                                 | p.Leu899Val                                                                                 | 3  | FALSE | chr17:29556328:T:G | 83:chr17:29556328:T:G | 0.001531 |
| 77_c2-2 | 77 | EGFR;<br>EGFR-AS1 | MODERATE; MODIFIER | c.2350T>C;<br>n.1212A>G                                                   | p.Ser784Pro                                                                                 | 4  | FALSE | chr7:55249052:T:C  | 83:chr7:55249052:T:C  | 0.001636 |
| 77_c2-2 | 77 | NTHL1;<br>TSC2    | MODIFIER; MODERATE | c.-20C>T;<br>c.170G>A                                                     | p.Arg57His                                                                                  | 0  | FALSE | chr16:2100432:G:A  | 83:chr16:2100432:G:A  | 0.001124 |
| 77_c2-2 | 77 | DDR2              | MODERATE           | c.1433G>A                                                                 | p.Arg478His                                                                                 | 1  | FALSE | chr1:162740231:G:A | 83:chr1:162740231:G:A | 0.001086 |
| 77_c2-2 | 77 | NTRK1             | MODERATE           | c.804C>G;<br>c.894C>G                                                     | p.His268Gln;<br>p.His298Gln                                                                 | 1  | FALSE | chr1:156843468:C:G | 83:chr1:156843468:C:G | 0.001322 |
| 77_c2-2 | 77 | NOTCH1            | MODERATE           | c.2588G>T                                                                 | p.Gly863Val                                                                                 | 0  | FALSE | chr9:139405257:C:A | 83:chr9:139405257:C:A | 0.002265 |
| 77_c2-2 | 77 | FGFR1             | MODERATE           | c.488G>T;<br>c.494G>T;<br>c.737G>T;<br>c.755G>T;<br>c.761G>T;<br>c.854G>T | p.Arg163Leu;<br>p.Arg165Leu;<br>p.Arg246Leu;<br>p.Arg252Leu;<br>p.Arg254Leu;<br>p.Arg285Leu | 1  | FALSE | chr8:38282202:C:A  | 83:chr8:38282202:C:A  | 0.001159 |
| 77_c2-2 | 77 | BRAF              | MODERATE           | c.1781A>G                                                                 | p.Asp594Gly                                                                                 | 59 | FALSE | chr7:140453154:T:C | 83:chr7:140453154:T:C | 0.001121 |
| 77_c2-2 | 77 | ROS1              | MODERATE           | c.5185G>T                                                                 | p.Val1729Leu                                                                                | 1  | FALSE | chr6:117658398:C:A | 83:chr6:117658398:C:A | 0.001124 |
| 77_c2-2 | 77 | CDH1              | MODERATE           | c.221G>A                                                                  | p.Arg74Gln                                                                                  | 0  | FALSE | chr16:68835630:G:A | 83:chr16:68835630:G:A | 0.000951 |
| 77_c2-2 | 77 | PDGFRA            | MODERATE           | c.340G>A                                                                  | p.Gly114Ser                                                                                 | 1  | FALSE | chr4:55127552:G:A  | 83:chr4:55127552:G:A  | 0.001157 |
| 77_c2-2 | 77 | KIT               | MODERATE           | c.365G>A                                                                  | p.Arg122His                                                                                 | 1  | FALSE | chr4:55564477:G:A  | 83:chr4:55564477:G:A  | 0.001078 |
| 77_c2-2 | 77 | PHLPP1            | MODERATE           | c.1971C>A                                                                 | p.Phe657Leu                                                                                 | 0  | FALSE | chr18:60527739:C:A | 83:chr18:60527739:C:A | 0.001372 |
| 77_c2-2 | 77 | APC               | HIGH               | c.1733C>A;<br>c.1787C>A                                                   | p.Ser578*;<br>p.Ser596*                                                                     | 0  | FALSE | chr5:112170691:C:A | 83:chr5:112170691:C:A | 0.001734 |

|         |    |                    |                            |                                                           |                                                     |   |       |                             |                                |          |
|---------|----|--------------------|----------------------------|-----------------------------------------------------------|-----------------------------------------------------|---|-------|-----------------------------|--------------------------------|----------|
| 77_c2-2 | 77 | CTNNB1             | MODERATE                   | c.98C>A                                                   | p.Ser33Tyr                                          | 0 | FALSE | chr3:4126<br>6101:C:A       | 83:chr3:41<br>266101:C:<br>A   | 0.001558 |
| 77_c2-2 | 77 | PIK3CA             | MODERATE                   | c.49C>T                                                   | p.Pro17Ser                                          | 1 | FALSE | chr3:1789<br>16662:C:T      | 83:chr3:17<br>8916662:C<br>:T  | 0.000978 |
| 77_c2-2 | 77 | C9orf53;<br>CDKN2A | MODIFIER; MODERATE;<br>LOW | n.*616T>G<br>;<br>c.*120A>C<br>;<br>c.197A>C;<br>c.240A>C | p.His66Pro;<br>p.Pro80Pro                           | 1 | FALSE | chr9:2197<br>1161:T:G       | 83:chr9:21<br>971161:T:<br>G   | 0.018298 |
| 77_c2-2 | 77 | TSC1               | MODERATE                   | c.2751G>T<br>;<br>c.2901G>T<br>;<br>c.2904G>T             | p.Arg917Ser<br>;<br>p.Arg967Ser<br>;<br>p.Arg968Ser | 0 | FALSE | chr9:1357<br>72642:C:A      | 83:chr9:13<br>5772642:C<br>:A  | 0.001605 |
| 77_c2-2 | 77 | CTNNB1             | MODERATE                   | c.91C>A                                                   | p.Leu31Met                                          | 0 | FALSE | chr3:4126<br>6094:C:A       | 83:chr3:41<br>266094:C:<br>A   | 0.002093 |
| 77_c2-2 | 77 | MIR4673;<br>NOTCH1 | MODIFIER; MODERATE         | n.*59G>T;<br>c.1343G>T                                    | p.Arg448Leu                                         | 0 | FALSE | chr9:1394<br>12302:C:A      | 83:chr9:13<br>9412302:C<br>:A  | 0.001652 |
| 77_c2-2 | 77 | TSC2               | MODERATE                   | c.1832G>A                                                 | p.Arg611Gln                                         | 0 | FALSE | chr16:212<br>0572:G:A       | 83:chr16:2<br>120572:G:<br>A   | 0.001712 |
| 77_c2-2 | 77 | KIT                | MODERATE                   | c.1485C>A                                                 | p.Asn495Lys                                         | 1 | FALSE | chr4:5559<br>2161:C:A       | 83:chr4:55<br>592161:C:<br>A   | 0.001172 |
| 77_c2-2 | 77 | NTRK3              | MODERATE                   | c.1071G>T                                                 | p.Glu357As<br>p                                     | 0 | FALSE | chr15:886<br>78465:C:A      | 83:chr15:8<br>8678465:C<br>:A  | 0.001147 |
| 77_c2-2 | 77 | NTRK3              | MODERATE                   | c.1459G>T<br>;<br>c.1483G>T                               | p.Asp487Tyr<br>;<br>p.Asp495Tyr                     | 0 | FALSE | chr15:885<br>76190:C:A      | 83:chr15:8<br>8576190:C<br>:A  | 0.002981 |
| 77_c2-2 | 77 | AR                 | MODERATE                   | c.2360G>A<br>;<br>c.764G>A                                | p.Arg787Gln<br>;<br>p.Arg255Gln                     | 0 | FALSE | chrX:6694<br>1716:G:A       | 83:chrX:66<br>941716:G:<br>A   | 0.002698 |
| 77_c2-2 | 77 | KDR                | MODERATE                   | c.2075G>T                                                 | p.Gly692Val                                         | 1 | FALSE | chr4:5596<br>8588:C:A       | 83:chr4:55<br>968588:C:<br>A   | 0.001378 |
| 77_c2-2 | 77 | C9orf53;<br>CDKN2A | MODIFIER; MODERATE;<br>LOW | n.*616C>A<br>;<br>c.*183G>T<br>;<br>c.260G>T;<br>c.303G>T | p.Arg87Leu;<br>p.Pro101Pro                          | 2 | FALSE | chr9:2197<br>1098:C:A       | 83:chr9:21<br>971098:C:<br>A   | 0.001146 |
| 77_c2-2 | 77 | EPHA3              | MODERATE                   | c.380C>A                                                  | p.Ser127Tyr                                         | 0 | FALSE | chr3:8925<br>9236:C:A       | 83:chr3:89<br>259236:C:<br>A   | 0.001206 |
| 77_c2-2 | 77 | ATM                | MODERATE                   | c.2075G>A                                                 | p.Arg692His                                         | 0 | FALSE | chr11:108<br>124717:G:<br>A | 83:chr11:1<br>08124717:<br>G:A | 0.00206  |

|         |    |                   |                    |                                                                                               |                                                                         |     |       |                        |                               |          |
|---------|----|-------------------|--------------------|-----------------------------------------------------------------------------------------------|-------------------------------------------------------------------------|-----|-------|------------------------|-------------------------------|----------|
| 77_c2-2 | 77 | RET               | MODERATE           | c.1991C>A                                                                                     | p.Ala664Asp                                                             | 2   | FALSE | chr10:436<br>10039:C:A | 83:chr10:4<br>3610039:C<br>:A | 0.001494 |
| 77_c2-2 | 77 | TP53              | MODIFIER; MODERATE | c.*137A>G<br>;<br>c.*225A>G<br>;<br>c.1001A>G<br>;<br>c.1118A>G<br>;<br>c.641A>G;<br>c.722A>G | p.Lys334Arg<br>;<br>p.Lys373Arg<br>;<br>p.Lys214Arg<br>;<br>p.Lys241Arg | 1   | FALSE | chr17:757<br>2991:T:C  | 83:chr17:7<br>572991:T:<br>C  | 0.002479 |
| 77_c2-2 | 77 | IDH2              | MODERATE           | c.128A>C;<br>c.362A>C;<br>c.518A>C                                                            | p.His43Pro;<br>p.His121Pro<br>;<br>p.His173Pro                          | 1   | FALSE | chr15:906<br>31835:T:G | 83:chr15:9<br>0631835:T<br>:G | 0.001907 |
| 77_c2-2 | 77 | GNA11             | MODERATE           | c.1030G>A                                                                                     | p.Val344Met                                                             | 1   | FALSE | chr19:312<br>1127:G:A  | 83:chr19:3<br>121127:G:<br>A  | 0.001605 |
| 77_c2-2 | 77 | NF1               | HIGH               | c.5817C>A<br>;<br>c.5880C>A                                                                   | p.Cys1939*;<br>p.Cys1960*                                               | 1   | FALSE | chr17:296<br>61923:C:A | 83:chr17:2<br>9661923:C<br>:A | 0.001459 |
| 77_c2-2 | 77 | DDR2              | MODERATE           | c.1418G>A                                                                                     | p.Arg473His                                                             | 2   | FALSE | chr1:1627<br>40216:G:A | 83:chr1:16<br>2740216:G<br>:A | 0.00102  |
| 77_c2-2 | 77 | SMO               | MODERATE           | c.869G>A                                                                                      | p.Arg290His                                                             | 0   | FALSE | chr7:1288<br>45572:G:A | 83:chr7:12<br>8845572:G<br>:A | 0.001017 |
| 77_c2-2 | 77 | MET               | MODERATE           | c.608C>A                                                                                      | p.Ser203Tyr                                                             | 1   | FALSE | chr7:1163<br>39746:C:A | 83:chr7:11<br>6339746:C<br>:A | 0.001508 |
| 77_c2-2 | 77 | TP53              | MODERATE           | c.257G>A;<br>c.338G>A;<br>c.617G>A;<br>c.734G>A                                               | p.Gly86Asp;<br>p.Gly113Asp<br>;<br>p.Gly206Asp<br>;<br>p.Gly245Asp      | 126 | FALSE | chr17:757<br>7547:C:T  | 83:chr17:7<br>577547:C:<br>T  | 0.001731 |
| 77_c2-2 | 77 | ERBB2             | MODIFIER; MODERATE | c.*2388C><br>T;<br>c.1841C>T;<br>c.1886C>T;<br>c.1931C>T;<br>n.2255C>T                        | p.Ala614Val;<br>p.Ala629Val;<br>p.Ala644Val                             | 1   | FALSE | chr17:378<br>76072:C:T | 83:chr17:3<br>7876072:C<br>:T | 0.001541 |
| 77_c2-2 | 77 | PIK3CA            | MODERATE           | c.112C>A                                                                                      | p.Arg38Ser                                                              | 9   | FALSE | chr3:1789<br>16725:C:A | 83:chr3:17<br>8916725:C<br>:A | 0.000939 |
| 77_c2-2 | 77 | EGFR;<br>EGFR-AS1 | MODERATE; MODIFIER | c.2300C>T;<br>n.1262G>A                                                                       | p.Ala767Val;                                                            | 5   | FALSE | chr7:5524<br>9002:C:T  | 83:chr7:55<br>249002:C:<br>T  | 0.0009   |



|         |    |        |                    |                                                                                                                                            |                                                                                                                                                         |   |       |                             |                                |          |
|---------|----|--------|--------------------|--------------------------------------------------------------------------------------------------------------------------------------------|---------------------------------------------------------------------------------------------------------------------------------------------------------|---|-------|-----------------------------|--------------------------------|----------|
| 77_c2-2 | 77 | NTRK3  | MODERATE           | c.1966G>T;<br>;<br>c.1990G>T                                                                                                               | p.Ala656Ser;<br>p.Ala664Ser                                                                                                                             | 0 | FALSE | chr15:884<br>72565:C:A      | 83:chr15:8<br>8472565:C<br>:A  | 0.001108 |
| 77_c2-2 | 77 | KIT    | MODERATE           | c.235C>A                                                                                                                                   | p.Gln79Lys                                                                                                                                              | 2 | FALSE | chr4:5556<br>1845:C:A       | 83:chr4:55<br>561845:C:<br>A   | 0.001458 |
| 77_c2-2 | 77 | PTEN   | HIGH               | c.688G>T                                                                                                                                   | p.Gly230*                                                                                                                                               | 2 | FALSE | chr10:897<br>17663:G:T      | 83:chr10:8<br>9717663:G<br>:T  | 0.001036 |
| 77_c2-2 | 77 | MAP2K1 | MODERATE           | c.722C>A                                                                                                                                   | p.Ser241Tyr                                                                                                                                             | 2 | FALSE | chr15:667<br>77356:C:A      | 83:chr15:6<br>6777356:C<br>:A  | 0.001324 |
| 77_c2-2 | 77 | KDR    | MODERATE           | c.583G>T                                                                                                                                   | p.Ala195Ser                                                                                                                                             | 1 | FALSE | chr4:5598<br>1116:C:A       | 83:chr4:55<br>981116:C:<br>A   | 0.001063 |
| 77_c2-2 | 77 | FBXW7  | HIGH               | c.1027G>T<br>;<br>c.1267G>T<br>;<br>c.913G>T                                                                                               | p.Gly343*;<br>p.Gly423*;<br>p.Gly305*                                                                                                                   | 0 | FALSE | chr4:1532<br>49511:C:A      | 83:chr4:15<br>3249511:C<br>:A  | 0.001315 |
| 77_c2-2 | 77 | MET    | HIGH               | c.1619G>A                                                                                                                                  | p.Trp540*                                                                                                                                               | 1 | FALSE | chr7:1163<br>80997:G:A      | 83:chr7:11<br>6380997:G<br>:A  | 0.000922 |
| 77_c2-2 | 77 | ALK    | MODERATE           | c.932G>T                                                                                                                                   | p.Arg311Leu                                                                                                                                             | 3 | FALSE | chr2:2991<br>7736:C:A       | 83:chr2:29<br>917736:C:<br>A   | 0.001108 |
| 77_c2-2 | 77 | FGFR2  | MODERATE; MODIFIER | c.1002G>T<br>;<br>c.1071G>T<br>;<br>c.1074G>T<br>;<br>c.1338G>T<br>;<br>c.1341G>T<br>;<br>c.987G>T;<br>c.990G>T;<br>c.993G>T;<br>n.1788G>T | p.Arg334Ser<br>;<br>p.Arg357Ser<br>;<br>p.Arg358Ser<br>;<br>p.Arg446Ser<br>;<br>p.Arg447Ser<br>;<br>p.Arg329Ser<br>;<br>p.Arg330Ser<br>;<br>p.Arg331Ser | 1 | FALSE | chr10:123<br>263405:C:<br>A | 83:chr10:1<br>23263405:<br>C:A | 0.001994 |
| 77_c2-2 | 77 | TSC2   | MODERATE           | c.1923C>A                                                                                                                                  | p.Ser641Arg                                                                                                                                             | 0 | FALSE | chr16:212<br>1594:C:A       | 83:chr16:2<br>121594:C:<br>A   | 0.00111  |
| 77_c2-2 | 77 | TP53   | MODERATE; HIGH     | c.363G>T;<br>c.480G>T;<br>c.84G>T;<br>c.3G>T                                                                                               | p.Met121Ile<br>;<br>p.Met160Ile<br>;<br>p.Met28Ile;<br>p.Met1?                                                                                          | 4 | FALSE | chr17:757<br>8450:C:A       | 83:chr17:7<br>578450:C:<br>A   | 0.001392 |

|         |    |                    |                    |                                                       |                                                     |    |       |                        |                               |          |
|---------|----|--------------------|--------------------|-------------------------------------------------------|-----------------------------------------------------|----|-------|------------------------|-------------------------------|----------|
| 77_c2-2 | 77 | TP53               | HIGH               | c.183T>A;<br>c.264T>A;<br>c.543T>A;<br>c.660T>A       | p.Tyr61*;<br>p.Tyr88*;<br>p.Tyr181*;<br>p.Tyr220*   | 3  | FALSE | chr17:757<br>8189:A:T  | 83:chr17:7<br>578189:A:<br>T  | 0.001325 |
| 77_c2-2 | 77 | TSC2               | MODERATE           | c.1654G>A                                             | p.Ala552Thr                                         | 0  | FALSE | chr16:211<br>5574:G:A  | 83:chr16:2<br>115574:G:<br>A  | 0.002452 |
| 77_c2-2 | 77 | NTRK1              | MODERATE           | c.2028C>A<br>;<br>c.2118C>A<br>;<br>c.2136C>A         | p.Ser676Arg<br>;<br>p.Ser706Arg<br>;<br>p.Ser712Arg | 1  | FALSE | chr1:1568<br>49880:C:A | 83:chr1:15<br>6849880:C<br>:A | 0.002349 |
| 77_c2-2 | 77 | NF1                | MODERATE           | c.3610C>T                                             | p.Arg1204Tr<br>p                                    | 2  | FALSE | chr17:295<br>60133:C:T | 83:chr17:2<br>9560133:C<br>:T | 0.001062 |
| 77_c2-2 | 77 | NOTCH1             | MODERATE           | c.6121G>T                                             | p.Val2041Le<br>u                                    | 0  | FALSE | chr9:1393<br>93410:C:A | 83:chr9:13<br>9393410:C<br>:A | 0.001542 |
| 77_c2-2 | 77 | PTEN               | HIGH               | c.138C>A                                              | p.Tyr46*                                            | 2  | FALSE | chr10:896<br>53840:C:A | 83:chr10:8<br>9653840:C<br>:A | 0.00111  |
| 77_c2-2 | 77 | FGFR4              | MODERATE           | c.461G>A                                              | p.Arg154His                                         | 3  | FALSE | chr5:1765<br>17963:G:A | 83:chr5:17<br>6517963:G<br>:A | 0.001926 |
| 77_c2-2 | 77 | FBXW7              | MODERATE           | c.1444G>T<br>;<br>c.1558G>T<br>;<br>c.1798G>T         | p.Asp482Tyr<br>;<br>p.Asp520Tyr<br>;<br>p.Asp600Tyr | 0  | FALSE | chr4:1532<br>45393:C:A | 83:chr4:15<br>3245393:C<br>:A | 0.001127 |
| 77_c2-2 | 77 | PTEN               | MODERATE           | c.729C>A                                              | p.Phe243Le<br>u                                     | 1  | FALSE | chr10:897<br>17704:C:A | 83:chr10:8<br>9717704:C<br>:A | 0.001832 |
| 77_c2-2 | 77 | C9orf53;<br>CDKN2A | MODIFIER; MODERATE | n.*616G>A<br>;<br>c.*318C>T;<br>c.*39C>T;<br>c.395C>T | p.Ala132Val                                         | 1  | FALSE | chr9:2197<br>0963:G:A  | 83:chr9:21<br>970963:G:<br>A  | 0.001723 |
| 77_c2-2 | 77 | TP53               | MODIFIER; MODERATE | c.-5G>T;<br>c.356G>T;<br>c.473G>T;<br>c.77G>T         | p.Arg119Leu<br>;<br>p.Arg158Leu<br>;<br>p.Arg26Leu  | 80 | FALSE | chr17:757<br>8457:C:A  | 83:chr17:7<br>578457:C:<br>A  | 0.002094 |
| 77_c2-2 | 77 | NTRK1              | MODERATE           | c.1751G>A<br>;<br>c.1841G>A<br>;<br>c.1859G>A         | p.Gly584Asp<br>;<br>p.Gly614Asp<br>;<br>p.Gly620Asp | 1  | FALSE | chr1:1568<br>48967:G:A | 83:chr1:15<br>6848967:G<br>:A | 0.001195 |
| 77_c2-2 | 77 | IGF1R              | MODERATE           | c.1732G>A                                             | p.Ala578Thr                                         | 0  | FALSE | chr15:994<br>56415:G:A | 83:chr15:9<br>9456415:G<br>:A | 0.001067 |

|         |    |                    |                            |                                                                                                                                                           |                                                                                                                                                              |    |       |                             |                                |          |
|---------|----|--------------------|----------------------------|-----------------------------------------------------------------------------------------------------------------------------------------------------------|--------------------------------------------------------------------------------------------------------------------------------------------------------------|----|-------|-----------------------------|--------------------------------|----------|
| 77_c2-2 | 77 | TP53               | MODERATE                   | c.350C>T;<br>c.431C>T;<br>c.710C>T;<br>c.827C>T                                                                                                           | p.Ala117Val;<br>p.Ala144Val;<br>p.Ala237Val;<br>p.Ala276Val                                                                                                  | 10 | FALSE | chr17:757<br>7111:G:A       | 83:chr17:7<br>577111:G:<br>A   | 0.001241 |
| 77_c2-2 | 77 | C9orf53;<br>CDKN2A | MODIFIER; MODERATE;<br>LOW | n.*616G>A<br>;<br>c.*228C>T;<br>c.305C>T;<br>c.348C>T                                                                                                     | p.Ala102Val;<br>p.Gly116Gly                                                                                                                                  | 5  | FALSE | chr9:2197<br>1053:G:A       | 83:chr9:21<br>971053:G:<br>A   | 0.001063 |
| 77_c2-2 | 77 | ATM                | MODERATE                   | c.7949A>C                                                                                                                                                 | p.Asp2650Ala                                                                                                                                                 | 0  | FALSE | chr11:108<br>204634:A:<br>C | 83:chr11:1<br>08204634:<br>A:C | 0.001163 |
| 77_c2-2 | 77 | PTEN               | MODERATE                   | c.421C>A                                                                                                                                                  | p.His141Asn                                                                                                                                                  | 2  | FALSE | chr10:896<br>92937:C:A      | 83:chr10:8<br>9692937:C<br>:A  | 0.00114  |
| 77_c2-2 | 77 | ATM                | MODERATE                   | c.1634C>A                                                                                                                                                 | p.Ala545Glu                                                                                                                                                  | 0  | FALSE | chr11:108<br>122590:C:<br>A | 83:chr11:1<br>08122590:<br>C:A | 0.001199 |
| 77_c2-2 | 77 | HGF                | MODERATE                   | c.1172G>A<br>;<br>c.1187G>A                                                                                                                               | p.Gly391Asp<br>;<br>p.Gly396Asp                                                                                                                              | 0  | FALSE | chr7:8135<br>0145:C:T       | 83:chr7:81<br>350145:C:<br>T   | 0.001651 |
| 77_c2-2 | 77 | GNA11              | MODERATE                   | c.440G>A                                                                                                                                                  | p.Arg147His                                                                                                                                                  | 1  | FALSE | chr19:311<br>3446:G:A       | 83:chr19:3<br>113446:G:<br>A   | 0.001212 |
| 77_c2-2 | 77 | ALK                | MODERATE                   | c.871C>T                                                                                                                                                  | p.Arg291Cys                                                                                                                                                  | 3  | FALSE | chr2:2991<br>7797:G:A       | 83:chr2:29<br>917797:G:<br>A   | 0.001004 |
| 77_c2-2 | 77 | PHLPP1             | MODERATE                   | c.2452G>A                                                                                                                                                 | p.Val818Ile                                                                                                                                                  | 0  | FALSE | chr18:605<br>70204:G:A      | 83:chr18:6<br>0570204:G<br>:A  | 0.001108 |
| 77_c2-2 | 77 | PIK3CA             | MODERATE                   | c.2452C>T                                                                                                                                                 | p.Arg818Cys                                                                                                                                                  | 2  | FALSE | chr3:1789<br>43785:C:T      | 83:chr3:17<br>8943785:C<br>:T  | 0.001194 |
| 77_c2-2 | 77 | FGFR2              | MODERATE; MODIFIER         | c.1591G>A<br>;<br>c.1594G>A<br>;<br>c.1597G>A<br>;<br>c.1606G>A<br>;<br>c.1675G>A<br>;<br>c.1678G>A<br>;<br>c.1942G>A<br>;<br>c.1945G>A<br>;<br>n.2392G>A | p.Ala531Thr<br>;<br>p.Ala532Thr<br>;<br>p.Ala533Thr<br>;<br>p.Ala536Thr<br>;<br>p.Ala559Thr<br>;<br>p.Ala560Thr<br>;<br>p.Ala648Thr<br>;<br>p.Ala649Thr<br>; | 3  | FALSE | chr10:123<br>247549:C:<br>T | 83:chr10:1<br>23247549:<br>C:T | 0.001229 |

|         |    |                 |                    |                                                  |                                                               |      |       |                             |                                |          |
|---------|----|-----------------|--------------------|--------------------------------------------------|---------------------------------------------------------------|------|-------|-----------------------------|--------------------------------|----------|
| 77_c2-2 | 77 | ERBB2           | MODERATE; MODIFIER | c.632C>T;<br>c.677C>T;<br>c.722C>T;<br>n.1046C>T | p.Ala211Val;<br>p.Ala226Val;<br>p.Ala241Val;                  | 2    | FALSE | chr17:378<br>66417:C:T      | 83:chr17:3<br>7866417:C<br>:T  | 0.001076 |
| 77_c2-2 | 77 | ATM             | HIGH               | c.2558C>A                                        | p.Ser853*                                                     | 0    | FALSE | chr11:108<br>137989:C:<br>A | 83:chr11:1<br>08137989:<br>C:A | 0.001536 |
| 77_c2-2 | 77 | FBXW7           | MODERATE           | c.1028G>T<br>;<br>c.1268G>T<br>; c.914G>T        | p.Gly343Val;<br>p.Gly423Val;<br>p.Gly305Val                   | 0    | FALSE | chr4:1532<br>49510:C:A      | 83:chr4:15<br>3249510:C<br>:A  | 0.00198  |
| 77_c2-2 | 77 | TSC2            | MODERATE           | c.781C>T                                         | p.Arg261Trp                                                   | 0    | FALSE | chr16:210<br>7112:C:T       | 83:chr16:2<br>107112:C:<br>T   | 0.002627 |
| 77_c2-2 | 77 | KDR             | MODERATE           | c.3449G>T                                        | p.Arg1150I<br>le                                              | 1    | FALSE | chr4:5595<br>5096:C:A       | 83:chr4:55<br>955096:C:<br>A   | 0.001039 |
| 77_c2-2 | 77 | NTRK1           | MODERATE           | c.1039C>T;<br>c.949C>T                           | p.Arg347Cys<br>;<br>p.Arg317Cys                               | 1    | FALSE | chr1:1568<br>43613:C:T      | 83:chr1:15<br>6843613:C<br>:T  | 0.001048 |
| 77_c2-2 | 77 | RET             | MODERATE           | c.1690A>C                                        | p.Thr564Pro                                                   | 1    | FALSE | chr10:436<br>08342:A:C      | 83:chr10:4<br>3608342:A<br>:C  | 0.001692 |
| 77_c2-2 | 77 | INSRR;<br>NTRK1 | LOW                | c.3397+8G<br>>T;<br>c.33C>A                      | ; p.Pro11Pro                                                  | 1    | FALSE | chr1:1568<br>11896:C:A      | 83:chr1:15<br>6811896:C<br>:A  | 0.001082 |
| 77_c2-2 | 77 | EGFR            | MODERATE           | c.1159C>G                                        | p.Leu387Val                                                   | 1    | FALSE | chr7:5522<br>4477:C:G       | 83:chr7:55<br>224477:C:<br>G   | 0.001031 |
| 77_c2-2 | 77 | PTEN            | HIGH               | c.720C>A                                         | p.Tyr240*                                                     | 3    | FALSE | chr10:897<br>17695:C:A      | 83:chr10:8<br>9717695:C<br>:A  | 0.002309 |
| 77_c2-2 | 77 | HGF             | HIGH               | c.1993G>T<br>;<br>c.2008G>T                      | p.Glu665*;<br>p.Glu670*                                       | 0    | FALSE | chr7:8133<br>4708:C:A       | 83:chr7:81<br>334708:C:<br>A   | 0.001836 |
| 77_c2-2 | 77 | TP53            | MODERATE           | c.116A>G;<br>c.35A>G;<br>c.395A>G;<br>c.512A>G   | p.Glu39Gly;<br>p.Glu12Gly;<br>p.Glu132Gly<br>;<br>p.Glu171Gly | 3    | FALSE | chr17:757<br>8418:T:C       | 83:chr17:7<br>578418:T:<br>C   | 0.001932 |
| 77_c2-2 | 77 | NOTCH1          | MODERATE           | c.2644G>A                                        | p.Ala882Thr                                                   | 0    | FALSE | chr9:1394<br>05201:C:T      | 83:chr9:13<br>9405201:C<br>:T  | 0.001404 |
| 77_c2-2 | 77 | KRAS            | MODERATE           | c.38G>T                                          | p.Gly13Val                                                    | 4010 | FALSE | chr12:253<br>98281:C:A      | 83:chr12:2<br>5398281:C<br>:A  | 0.001155 |

|         |    |                            |                    |                                                                                                                      |                                           |    |       |                        |                                |          |
|---------|----|----------------------------|--------------------|----------------------------------------------------------------------------------------------------------------------|-------------------------------------------|----|-------|------------------------|--------------------------------|----------|
| 77_c2-2 | 77 | GAPDH;<br>IFFO1;<br>NCAPD2 | MODERATE; MODIFIER | c.157G>A;<br>c.283G>A;<br>c.*1743C><br>T;<br>c.*1746C><br>T;<br>c.*1770C><br>T;<br>n.*2798C><br>T;<br>c.*4252G><br>A | p.Val53Ile;<br>p.Val95Ile;                | 0  | FALSE | chr12:664<br>6132:G:A  | 83:chr12:6<br>646132:G:<br>A   | 0.001438 |
| 77_c2-2 | 77 | MIR4673;<br>NOTCH1         | MODIFIER; MODERATE | n.-1G>T;<br>c.221G>T                                                                                                 | ; p.Cys74Phe                              | 0  | FALSE | chr9:1394<br>18351:C:A | 83:chr9:13<br>9418351:C<br>:A  | 0.002773 |
| 77_c2-2 | 77 | MITF                       | MODIFIER; MODERATE | c.-<br>53+197C><br>A;<br>c.104+241<br>88C>A;<br>c.48C>A                                                              | ; p.Phe16Leu                              | 0  | FALSE | chr3:6981<br>3040:C:A  | 83:chr3:69<br>813040:C:<br>A   | 0.001011 |
| 77_c2-2 | 77 | HGF                        | MODERATE           | c.5G>T                                                                                                               | p.Trp2Leu                                 | 0  | FALSE | chr7:8139<br>9283:C:A  | 83:chr7:81<br>399283:C:<br>A   | 0.001255 |
| 77_c2-2 | 77 | EGFR                       | MODIFIER; MODERATE | c.*2364C><br>T;<br>c.2174C>T                                                                                         | ; p.Thr725Met                             | 2  | FALSE | chr7:5524<br>1726:C:T  | 83:chr7:55<br>241726:C:<br>T   | 0.001291 |
| 77_c2-2 | 77 | FBXW7                      | MODERATE           | c.182G>A;<br>c.296G>A;<br>c.536G>A                                                                                   | p.Arg61His;<br>p.Arg99His;<br>p.Arg179His | 0  | FALSE | chr4:1532<br>71242:C:T | 83:chr4:15<br>3271242:C:<br>:T | 0.001214 |
| 77_c2-2 | 77 | NF1                        | MODERATE           | c.3559C>A                                                                                                            | p.Leu1187Ile                              | 1  | FALSE | chr17:295<br>60082:C:A | 83:chr17:2<br>9560082:C<br>:A  | 0.001096 |
| 77_c2-2 | 77 | CTNNB1                     | MODERATE           | c.861C>A                                                                                                             | p.Asn287Lys                               | 0  | FALSE | chr3:4126<br>7277:C:A  | 83:chr3:41<br>267277:C:<br>A   | 0.001744 |
| 77_c2-2 | 77 | TP53                       | MODIFIER; MODERATE | c.-1G>T; c.-<br>82G>T;<br>c.279G>T;<br>c.396G>T                                                                      | ; p.Lys93Asn;<br>p.Lys132Asn              | 34 | FALSE | chr17:757<br>8534:C:A  | 83:chr17:7<br>578534:C:<br>A   | 0.001255 |
| 77_c2-2 | 77 | MIR4673;<br>NOTCH1         | MODIFIER; MODERATE | n.*59G>A;<br>c.1775G>A                                                                                               | ; p.Arg592His                             | 0  | FALSE | chr9:1394<br>10063:C:T | 83:chr9:13<br>9410063:C<br>:T  | 0.001512 |
| 77_c2-2 | 77 | PTEN                       | MODERATE           | c.392C>A                                                                                                             | p.Thr131Asn                               | 2  | FALSE | chr10:896<br>92908:C:A | 83:chr10:8<br>9692908:C<br>:A  | 0.001082 |
| 77_c2-2 | 77 | IGF1R                      | MODERATE           | c.3934T>C;<br>c.3937T>C                                                                                              | p.Ser1312Pro;<br>p.Ser1313Pro             | 0  | FALSE | chr15:995<br>00504:T:C | 83:chr15:9<br>9500504:T<br>:C  | 0.004023 |

|         |    |                             |                    |                                                                                               |                                                          |      |       |                        |                               |          |
|---------|----|-----------------------------|--------------------|-----------------------------------------------------------------------------------------------|----------------------------------------------------------|------|-------|------------------------|-------------------------------|----------|
| 77_c2-2 | 77 | DDR2                        | MODERATE           | c.313C>A                                                                                      | p.Arg105Ser                                              | 2    | FALSE | chr1:1627<br>24541:C:A | 83:chr1:16<br>2724541:C<br>:A | 0.001052 |
| 77_c2-2 | 77 | FGFR1                       | MODIFIER; MODERATE | c.-32G>A;<br>c.160G>A;<br>c.61G>A                                                             | p.Ala54Thr;<br>p.Ala21Thr                                | 2    | FALSE | chr8:3831<br>4904:C:T  | 83:chr8:38<br>314904:C:<br>T  | 0.000979 |
| 77_c2-2 | 77 | ALK                         | MODERATE           | c.4192C>T                                                                                     | p.Pro1398Ser                                             | 1    | FALSE | chr2:2941<br>6761:G:A  | 83:chr2:29<br>416761:G:<br>A  | 0.001176 |
| 77_c2-2 | 77 | PIK3CA                      | MODERATE           | c.3044C>A                                                                                     | p.Ser1015Tyr                                             | 3    | FALSE | chr3:1789<br>51989:C:A | 83:chr3:17<br>8951989:C<br>:A | 0.000969 |
| 77_c2-2 | 77 | IDH2                        | MODIFIER; HIGH     | c.-3G>T; c.-<br>17-<br>2859G>T;<br>c.154G>T                                                   | p.Glu52*                                                 | 1    | FALSE | chr15:906<br>34838:C:A | 83:chr15:9<br>0634838:C<br>:A | 0.001637 |
| 77_c2-2 | 77 | EGFR;<br>EGFR-AS1           | LOW; MODIFIER      | c.2472C>A<br>; n.-1G>T                                                                        | p.Gly824Gly                                              | 1    | FALSE | chr7:5525<br>9414:C:A  | 83:chr7:55<br>259414:C:<br>A  | 0.001614 |
| 77_c2-2 | 77 | NF1                         | MODERATE           | c.335A>G                                                                                      | p.Gln112Arg                                              | 1    | FALSE | chr17:294<br>90250:A:G | 83:chr17:2<br>9490250:A<br>:G | 0.002119 |
| 77_c2-2 | 77 | PIK3CA                      | MODERATE           | c.1633G>A                                                                                     | p.Glu545Lys                                              | 1189 | FALSE | chr3:1789<br>36091:G:A | 83:chr3:17<br>8936091:G<br>:A | 0.006366 |
| 77_c2-2 | 77 | FGFR3                       | MODIFIER; MODERATE | c.931-<br>374G>A;<br>c.1196G>A<br>;<br>c.1202G>A                                              | p.Arg399His<br>;<br>p.Arg401His                          | 1    | FALSE | chr4:1806<br>177:G:A   | 83:chr4:18<br>06177:G:A       | 0.001579 |
| 77_c2-2 | 77 | HRAS;<br>LRRC56             | MODERATE; MODIFIER | c.383G>T;<br>c.-506C>A                                                                        | p.Arg128Leu                                              | 1    | FALSE | chr11:533<br>520:C:A   | 83:chr11:5<br>33520:C:A       | 0.001258 |
| 77_c2-2 | 77 | TP53                        | MODERATE; MODIFIER | c.100G>T;<br>c.217G>T;<br>c.-279G>T;<br>c.-360G>T                                             | p.Val34Leu;<br>p.Val73Leu;                               | 5    | FALSE | chr17:757<br>9470:C:A  | 83:chr17:7<br>579470:C:<br>A  | 0.001522 |
| 77_c2-2 | 77 | AKT3                        | HIGH               | c.109G>T                                                                                      | p.Gly37*                                                 | 0    | FALSE | chr1:2438<br>58956:C:A | 83:chr1:24<br>3858956:C<br>:A | 0.001132 |
| 77_c2-2 | 77 | ERBB2;<br>MIEN1;<br>MIR4728 | MODERATE; MODIFIER | c.2720A>G<br>;<br>c.2765A>G<br>;<br>c.2810A>G<br>;<br>n.3134A>G<br>;<br>c.*388T>C;<br>n.-1A>G | p.Lys907Arg<br>;<br>p.Lys922Arg<br>;<br>p.Lys937Arg<br>; | 1    | FALSE | chr17:378<br>82044:A:G | 83:chr17:3<br>7882044:A<br>:G | 0.00292  |
| 77_c2-2 | 77 | BRAF                        | MODERATE           | c.1391G>T                                                                                     | p.Gly464Val                                              | 9    | FALSE | chr7:1404<br>81417:C:A | 83:chr7:14<br>0481417:C<br>:A | 0.001139 |

|         |    |                 |                    |                                                                                                   |                                                                         |   |       |                             |                                |          |
|---------|----|-----------------|--------------------|---------------------------------------------------------------------------------------------------|-------------------------------------------------------------------------|---|-------|-----------------------------|--------------------------------|----------|
| 77_c2-2 | 77 | GAPDH;<br>IFFO1 | MODERATE; MODIFIER | c.683T>C;<br>c.809T>C;<br>c.*1743A><br>G;<br>c.*1746A><br>G;<br>c.*1770A><br>G;<br>n.*2798A><br>G | p.Leu228Pro<br>;<br>p.Leu270Pro<br>;                                    | 0 | FALSE | chr12:664<br>7033:T:C       | 83:chr12:6<br>647033:T:<br>C   | 0.001263 |
| 77_c2-2 | 77 | TP53            | MODIFIER; MODERATE | c.*145T>C;<br>c.*233T>C;<br>c.1009T>C;<br>c.1126T>C;<br>c.649T>C;<br>c.730T>C                     | p.Ser337Pro<br>;<br>p.Ser376Pro<br>;<br>p.Ser217Pro<br>;<br>p.Ser244Pro | 2 | FALSE | chr17:757<br>2983:A:G       | 83:chr17:7<br>572983:A:<br>G   | 0.001654 |
| 77_c2-2 | 77 | RET             | MODERATE           | c.2116G>A                                                                                         | p.Val706Me<br>t                                                         | 2 | FALSE | chr10:436<br>10164:G:A      | 83:chr10:4<br>3610164:G<br>:A  | 0.000914 |
| 77_c2-2 | 77 | ATM             | MODERATE           | c.4315C>A                                                                                         | p.Leu1439I<br>l                                                         | 0 | FALSE | chr11:108<br>160407:C:<br>A | 83:chr11:1<br>08160407:<br>C:A | 0.001151 |
| 77_c2-2 | 77 | FBXW7           | HIGH               | c.1057G>T<br>;<br>c.1171G>T<br>;<br>c.1411G>T                                                     | p.Glu353*;<br>p.Glu391*;<br>p.Glu471*                                   | 0 | FALSE | chr4:1532<br>49367:C:A      | 83:chr4:15<br>3249367:C<br>:A  | 0.002241 |
| 77_c2-2 | 77 | NOTCH1          | MODERATE           | c.4571C>T                                                                                         | p.Ala1524Va<br>l                                                        | 0 | FALSE | chr9:1393<br>99777:G:A      | 83:chr9:13<br>9399777:G<br>:A  | 0.001284 |
| 77_c2-2 | 77 | NF1             | MODERATE           | c.1496T>C                                                                                         | p.Leu499Pro                                                             | 1 | FALSE | chr17:295<br>41572:T:C      | 83:chr17:2<br>9541572:T<br>:C  | 0.001122 |
| 77_c2-2 | 77 | NOTCH1          | MODERATE           | c.3407G>T                                                                                         | p.Gly1136Va<br>l                                                        | 0 | FALSE | chr9:1394<br>02510:C:A      | 83:chr9:13<br>9402510:C<br>:A  | 0.001465 |
| 77_c2-2 | 77 | CTNNB1          | MODERATE           | c.110C>A                                                                                          | p.Ser37Tyr                                                              | 0 | FALSE | chr3:4126<br>6113:C:A       | 83:chr3:41<br>266113:C:<br>A   | 0.002083 |
| 77_c2-2 | 77 | EGFR            | MODERATE           | c.719G>A                                                                                          | p.Cys240Tyr                                                             | 1 | FALSE | chr7:5522<br>0329:G:A       | 83:chr7:55<br>220329:G:<br>A   | 0.001214 |
| 77_c2-2 | 77 | FBXW7           | MODERATE           | c.1078G>T<br>;<br>c.1318G>T<br>;<br>c.964G>T                                                      | p.Asp360Tyr<br>;<br>p.Asp440Tyr<br>;<br>p.Asp322Tyr                     | 0 | FALSE | chr4:1532<br>49460:C:A      | 83:chr4:15<br>3249460:C<br>:A  | 0.001144 |
| 77_c2-2 | 77 | NTRK3           | MODERATE           | c.698G>T                                                                                          | p.Gly233Val                                                             | 0 | FALSE | chr15:886<br>79765:C:A      | 83:chr15:8<br>8679765:C<br>:A  | 0.001237 |
| 77_c2-2 | 77 | ALG10           | MODERATE           | c.272G>A                                                                                          | p.Cys91Tyr                                                              | 0 | FALSE | chr12:341<br>76997:G:A      | 83:chr12:3<br>4176997:G<br>:A  | 0.001546 |

|         |    |                    |                    |                                                                                 |                                                                                                                 |    |       |                        |                               |          |
|---------|----|--------------------|--------------------|---------------------------------------------------------------------------------|-----------------------------------------------------------------------------------------------------------------|----|-------|------------------------|-------------------------------|----------|
| 77_c2-2 | 77 | FBXW7              | MODERATE           | c.1204G>T<br>;<br>c.1318G>T<br>;<br>c.1558G>T                                   | p.Asp402Tyr<br>;<br>p.Asp440Tyr<br>;<br>p.Asp520Tyr                                                             | 0  | FALSE | chr4:1532<br>47244:C:A | 83:chr4:15<br>3247244:C<br>:A | 0.001115 |
| 77_c2-2 | 77 | EPHA3              | MODERATE           | c.237C>A                                                                        | p.Asn79Lys                                                                                                      | 0  | FALSE | chr3:8925<br>9093:C:A  | 83:chr3:89<br>259093:C<br>:A  | 0.001043 |
| 77_c2-2 | 77 | DDR2               | MODERATE           | c.691C>A                                                                        | p.Gln231Lys                                                                                                     | 1  | FALSE | chr1:1627<br>29605:C:A | 83:chr1:16<br>2729605:C<br>:A | 0.00114  |
| 77_c2-2 | 77 | FGFR4              | MODIFIER; MODERATE | c.1098-<br>65G>A;<br>c.1251+10<br>G>A;<br>c.1067G>A                             | p.Arg356His                                                                                                     | 1  | FALSE | chr5:1765<br>20342:G:A | 83:chr5:17<br>6520342:G<br>:A | 0.001425 |
| 77_c2-2 | 77 | FGFR3              | MODIFIER; MODERATE | c.931-<br>398C>A;<br>c.1172C>A<br>;<br>c.1178C>A                                | p.Ala391Glu<br>;<br>p.Ala393Glu                                                                                 | 34 | FALSE | chr4:1806<br>153:C:A   | 83:chr4:18<br>06153:C:A       | 0.005952 |
| 77_c2-2 | 77 | FGFR1              | MODERATE           | c.1453C>T;<br>c.1459C>T;<br>c.1696C>T;<br>c.1720C>T;<br>c.1726C>T;<br>c.1819C>T | p.Arg485Trp<br>;<br>p.Arg487Trp<br>;<br>p.Arg566Trp<br>;<br>p.Arg574Trp<br>;<br>p.Arg576Trp<br>;<br>p.Arg607Trp | 1  | FALSE | chr8:3827<br>3516:G:A  | 83:chr8:38<br>273516:G<br>:A  | 0.002037 |
| 77_c2-2 | 77 | KDR                | MODERATE           | c.491G>T                                                                        | p.Arg164Ile                                                                                                     | 1  | FALSE | chr4:5598<br>1208:C:A  | 83:chr4:55<br>981208:C<br>:A  | 0.00183  |
| 80_c3-1 | 80 | CWH43              | MODERATE           | c.1407C>A<br>;<br>c.1488C>A                                                     | p.Ser469Arg<br>;<br>p.Ser496Arg                                                                                 | 0  | FALSE | chr4:4903<br>2957:C:A  | 84:chr4:49<br>032957:C<br>:A  | 0.004577 |
| 80_c3-1 | 80 | C9orf53;<br>CDKN2A | MODIFIER; MODERATE | n.*616C>G<br>;<br>c.*140G>C<br>;<br>c.217G>C;<br>c.260G>C                       | p.Ala73Pro;<br>p.Arg87Pro                                                                                       | 1  | FALSE | chr9:2197<br>1141:C:G  | 84:chr9:21<br>971141:C<br>:G  | 0.058252 |
| 80_c3-1 | 80 | IGF1R              | MODERATE           | c.3934T>C;<br>c.3937T>C                                                         | p.Ser1312Pro;<br>p.Ser1313Pro                                                                                   | 0  | FALSE | chr15:995<br>00504:T:C | 84:chr15:9<br>9500504:T<br>:C | 0.026005 |



|           |    |                             |                            |                                                                                                                      |                                                                         |   |       |                        |                               |          |
|-----------|----|-----------------------------|----------------------------|----------------------------------------------------------------------------------------------------------------------|-------------------------------------------------------------------------|---|-------|------------------------|-------------------------------|----------|
| 80_c3-1   | 80 | TP53                        | MODIFIER; MODERATE         | c.*137A>G<br>;<br>c.*225A>G<br>;<br>c.1001A>G<br>;<br>c.1118A>G<br>;<br>c.641A>G;<br>c.722A>G                        | p.Lys334Arg<br>;<br>p.Lys373Arg<br>;<br>p.Lys214Arg<br>;<br>p.Lys241Arg | 1 | FALSE | chr17:757<br>2991:T:C  | 84:chr17:7<br>572991:T:<br>C  | 0.00722  |
| 80_c3-1   | 80 | C9orf53;<br>CDKN2A          | MODIFIER; MODERATE;<br>LOW | n.*616T>G<br>;<br>c.*120A>C<br>;<br>c.197A>C;<br>c.240A>C                                                            | p.His66Pro;<br>p.Pro80Pro                                               | 1 | FALSE | chr9:2197<br>1161:T:G  | 84:chr9:21<br>971161:T:<br>G  | 0.021645 |
| 80_c3-1   | 80 | VHL                         | MODIFIER; MODERATE         | c.341-<br>3270A>C;<br>c.344A>C                                                                                       | p.His115Pro                                                             | 0 | FALSE | chr3:1018<br>8201:A:C  | 84:chr3:10<br>188201:A:<br>C  | 0.004751 |
| 80_c3-1   | 80 | CTNNB1                      | MODERATE                   | c.1972G>T                                                                                                            | p.Val658Phe                                                             | 0 | FALSE | chr3:4127<br>8096:G:T  | 84:chr3:41<br>278096:G:<br>T  | 0.004376 |
| 80_c3-1   | 80 | PIK3CA                      | MODERATE                   | c.892C>T                                                                                                             | p.Pro298Ser                                                             | 1 | FALSE | chr3:1789<br>21410:C:T | 84:chr3:17<br>8921410:C<br>:T | 0.004264 |
| 80_c3-1   | 80 | ERBB2;<br>MIEN1;<br>MIR4728 | MODIFIER; MODERATE         | c.3160-<br>213A>G;<br>c.3251A>G<br>;<br>c.3296A>G<br>;<br>c.3341A>G<br>;<br>n.3665A>G<br>;<br>c.*388T>C;<br>n.*67A>G | p.Glu1084Gl<br>y;<br>p.Glu1099Gl<br>y;<br>p.Glu1114Gl<br>y              | 1 | FALSE | chr17:378<br>83729:A:G | 84:chr17:3<br>7883729:A<br>:G | 0.004673 |
| 80_c3-1   | 80 | PIK3CA                      | MODERATE                   | c.1235G>A                                                                                                            | p.Arg412Gln                                                             | 1 | FALSE | chr3:1789<br>27472:G:A | 84:chr3:17<br>8927472:G<br>:A | 0.004535 |
| 80_c3-1   | 80 | NTRK1                       | MODERATE                   | c.1940T>G<br>;<br>c.2030T>G<br>;<br>c.2048T>G                                                                        | p.Val647Gly;<br>p.Val677Gly;<br>p.Val683Gly                             | 2 | FALSE | chr1:1568<br>49792:T:G | 84:chr1:15<br>6849792:T<br>:G | 0.023333 |
| 86_c1w2-1 | 86 | IGF1R                       | MODERATE                   | c.3934T>C;<br>c.3937T>C                                                                                              | p.Ser1312Pr<br>o;<br>p.Ser1313Pr<br>o                                   | 0 | FALSE | chr15:995<br>00504:T:C | 85:chr15:9<br>9500504:T<br>:C | 0.021231 |

|           |    |                    |                    |                                                                                               |                                                                           |    |       |                        |                               |          |
|-----------|----|--------------------|--------------------|-----------------------------------------------------------------------------------------------|---------------------------------------------------------------------------|----|-------|------------------------|-------------------------------|----------|
| 86_c1w2-1 | 86 | TP53               | MODIFIER; HIGH     | c.-55C>A;<br>c.27C>A;<br>c.306C>A;<br>c.423C>A                                                | ; p.Cys9*;<br>p.Cys102*;<br>p.Cys141*                                     | 13 | FALSE | chr17:757<br>8507:G:T  | 85:chr17:7<br>578507:G:<br>T  | 0.283654 |
| 86_c1w2-1 | 86 | EPHA3              | MODERATE           | c.2275G>T                                                                                     | p.Val759Leu                                                               | 0  | FALSE | chr3:8948<br>0438:G:T  | 85:chr3:89<br>480438:G:<br>T  | 0.020833 |
| 86_c1w2-1 | 86 | CDH1               | HIGH               | c.1595G>A                                                                                     | p.Trp532*                                                                 | 0  | FALSE | chr16:688<br>53212:G:A | 85:chr16:6<br>8853212:G<br>:A | 0.019802 |
| 86_c1w2-1 | 86 | TP53               | MODIFIER; MODERATE | c.-3G>T;<br>c.358G>T;<br>c.475G>T;<br>c.79G>T                                                 | ; p.Ala120Ser;<br>p.Ala159Ser;<br>p.Ala27Ser                              | 23 | FALSE | chr17:757<br>8455:C:A  | 85:chr17:7<br>578455:C:<br>A  | 0.006472 |
| 86_c1w2-1 | 86 | NTRK1              | MODERATE           | c.1940T>G<br>;<br>c.2030T>G<br>;<br>c.2048T>G                                                 | p.Val647Gly;<br>p.Val677Gly;<br>p.Val683Gly                               | 2  | FALSE | chr1:1568<br>49792:T:G | 85:chr1:15<br>6849792:T<br>:G | 0.02381  |
| 86_c1w2-1 | 86 | TP53               | MODIFIER; MODERATE | c.*148A>C<br>;<br>c.*236A>C<br>;<br>c.1012A>C<br>;<br>c.1129A>C<br>;<br>c.652A>C;<br>c.733A>C | ; p.Thr338Pro<br>;<br>p.Thr377Pro<br>;<br>p.Thr218Pro<br>;<br>p.Thr245Pro | 2  | FALSE | chr17:757<br>2980:T:G  | 85:chr17:7<br>572980:T:<br>G  | 0.232558 |
| 86_c1w2-1 | 86 | CDKN2A             | MODIFIER; MODERATE | c.194-<br>3568A>C;<br>c.52A>C                                                                 | ; p.Thr18Pro                                                              | 1  | FALSE | chr9:2197<br>4775:T:G  | 85:chr9:21<br>974775:T:<br>G  | 0.012903 |
| 86_c1w2-1 | 86 | MITF               | MODERATE           | c.127A>C;<br>c.235A>C;<br>c.280A>C;<br>c.283A>C                                               | p.Thr43Pro;<br>p.Thr79Pro;<br>p.Thr94Pro;<br>p.Thr95Pro                   | 0  | FALSE | chr3:6992<br>8463:A:C  | 85:chr3:69<br>928463:A:<br>C  | 0.043478 |
| 86_c1w2-1 | 86 | CDKN2A             | MODIFIER; MODERATE | c.194-<br>3570C>G;<br>c.50C>G                                                                 | ; p.Ala17Gly                                                              | 1  | FALSE | chr9:2197<br>4777:G:C  | 85:chr9:21<br>974777:G:<br>C  | 0.013423 |
| 86_c1w2-1 | 86 | C9orf53;<br>CDKN2A | MODIFIER; MODERATE | n.*616C>G<br>;<br>c.*140G>C<br>;<br>c.217G>C;<br>c.260G>C                                     | ; p.Ala73Pro;<br>p.Arg87Pro                                               | 1  | FALSE | chr9:2197<br>1141:C:G  | 85:chr9:21<br>971141:C:<br>G  | 0.059055 |

|           |    |                             |                            |                                                                                               |                                                                         |       |       |                        |                               |          |
|-----------|----|-----------------------------|----------------------------|-----------------------------------------------------------------------------------------------|-------------------------------------------------------------------------|-------|-------|------------------------|-------------------------------|----------|
| 86_c1w2-1 | 86 | ERBB2;<br>MIEN1;<br>MIR4728 | MODERATE; MODIFIER         | c.2600G>A<br>;<br>c.2645G>A<br>;<br>c.2690G>A<br>;<br>n.3014G>A<br>;<br>c.*388C>T;<br>n.-1G>A | p.Arg867Gln<br>;<br>p.Arg882Gln<br>;<br>p.Arg897Gln<br>;                | 2     | FALSE | chr17:378<br>81620:G:A | 85:chr17:3<br>7881620:G<br>:A | 0.007752 |
| 86_c2-1   | 86 | KRAS                        | MODERATE                   | c.35G>C                                                                                       | p.Gly12Ala                                                              | 11213 | FALSE | chr12:253<br>98284:C:G | 86:chr12:2<br>5398284:C<br>:G | 0.053333 |
| 86_c2-1   | 86 | FGFR3                       | MODERATE                   | c.743G>A                                                                                      | p.Arg248His                                                             | 2     | FALSE | chr4:1803<br>565:G:A   | 86:chr4:18<br>03565:G:A       | 0.00722  |
| 86_c2-1   | 86 | CTNNB1                      | MODERATE                   | c.1972G>T                                                                                     | p.Val658Phe                                                             | 0     | FALSE | chr3:4127<br>8096:G:T  | 86:chr3:41<br>278096:G<br>:T  | 0.003906 |
| 86_c2-1   | 86 | TP53                        | MODIFIER; MODERATE         | c.*137A>G<br>;<br>c.*225A>G<br>;<br>c.1001A>G<br>;<br>c.1118A>G<br>;<br>c.641A>G;<br>c.722A>G | p.Lys334Arg<br>;<br>p.Lys373Arg<br>;<br>p.Lys214Arg<br>;<br>p.Lys241Arg | 1     | FALSE | chr17:757<br>2991:T:C  | 86:chr17:7<br>572991:T<br>:C  | 0.012048 |
| 86_c2-1   | 86 | TP53                        | MODIFIER; MODERATE         | c.-14C>G;<br>c.347C>G;<br>c.464C>G;<br>c.68C>G                                                | p.Thr116Ser<br>;<br>p.Thr155Ser<br>;<br>p.Thr23Ser                      | 27    | FALSE | chr17:757<br>8466:G:C  | 86:chr17:7<br>578466:G<br>:C  | 0.008214 |
| 86_c2-1   | 86 | RET                         | MODERATE                   | c.1690A>C                                                                                     | p.Thr564Pro                                                             | 1     | FALSE | chr10:436<br>08342:A:C | 86:chr10:4<br>3608342:A<br>:C | 0.004    |
| 86_c2-1   | 86 | C9orf53;<br>CDKN2A          | MODIFIER; MODERATE;<br>LOW | n.*616T>G<br>;<br>c.*120A>C<br>;<br>c.197A>C;<br>c.240A>C                                     | p.His66Pro;<br>p.Pro80Pro                                               | 1     | FALSE | chr9:2197<br>1161:T:G  | 86:chr9:21<br>971161:T<br>:G  | 0.029674 |
| 86_c2-1   | 86 | C9orf53;<br>CDKN2A          | MODIFIER; MODERATE         | n.*616C>G<br>;<br>c.*140G>C<br>;<br>c.217G>C;<br>c.260G>C                                     | p.Ala73Pro;<br>p.Arg87Pro                                               | 1     | FALSE | chr9:2197<br>1141:C:G  | 86:chr9:21<br>971141:C<br>:G  | 0.046931 |
| 86_c2-1   | 86 | IGF1R                       | MODERATE                   | c.3934T>C;<br>c.3937T>C                                                                       | p.Ser1312Pr<br>o;<br>p.Ser1313Pr<br>o                                   | 0     | FALSE | chr15:995<br>00504:T:C | 86:chr15:9<br>9500504:T<br>:C | 0.012526 |

|         |    |                 |                    |                                                |                                                 |    |       |                             |                                |          |
|---------|----|-----------------|--------------------|------------------------------------------------|-------------------------------------------------|----|-------|-----------------------------|--------------------------------|----------|
| 86_c2-1 | 86 | TP53            | MODIFIER; MODERATE | c.-15A>C;<br>c.346A>C;<br>c.463A>C;<br>c.67A>C | p.Thr116Pro<br>;<br>p.Thr155Pro<br>; p.Thr23Pro | 17 | FALSE | chr17:757<br>8467:T:G       | 86:chr17:7<br>578467:T:<br>G   | 0.008421 |
| 86_c2-1 | 86 | NTHL1;<br>TSC2  | MODIFIER; MODERATE | c.-20G>A;<br>c.175C>T                          | ; p.Arg59Trp                                    | 0  | FALSE | chr16:210<br>0437:C:T       | 86:chr16:2<br>100437:C:<br>T   | 0.007859 |
| 73_c4-1 | 73 | CDH1            | HIGH               | c.763C>T                                       | p.Gln255*                                       | 0  | FALSE | chr16:688<br>44175:C:T      | 88:chr16:6<br>8844175:C<br>:T  | 0.001558 |
| 73_c4-1 | 73 | IGF1R           | MODERATE           | c.3934T>C;<br>c.3937T>C                        | p.Ser1312Pr<br>o;<br>p.Ser1313Pr<br>o           | 0  | FALSE | chr15:995<br>00504:T:C      | 88:chr15:9<br>9500504:T<br>:C  | 0.005982 |
| 73_c4-1 | 73 | MAP2K1          | MODERATE           | c.198C>A                                       | p.Asp66Glu                                      | 4  | FALSE | chr15:667<br>27482:C:A      | 88:chr15:6<br>6727482:C<br>:A  | 0.001885 |
| 73_c4-1 | 73 | HGF             | HIGH               | c.1993G>T<br>;<br>c.2008G>T                    | p.Glu665*;<br>p.Glu670*                         | 0  | FALSE | chr7:8133<br>4708:C:A       | 88:chr7:81<br>334708:C:<br>A   | 0.001883 |
| 73_c4-1 | 73 | NOTCH1          | MODERATE           | c.6121G>T                                      | p.Val2041Le<br>u                                | 0  | FALSE | chr9:1393<br>93410:C:A      | 88:chr9:13<br>9393410:C<br>:A  | 0.002439 |
| 73_c4-1 | 73 | NOTCH1          | MODERATE           | c.4825G>T                                      | p.Asp1609T<br>yr                                | 0  | FALSE | chr9:1393<br>99318:C:A      | 88:chr9:13<br>9399318:C<br>:A  | 0.003405 |
| 73_c4-1 | 73 | NTRK2           | MODERATE           | c.1318C>A<br>;<br>c.1357C>A                    | p.Leu440Me<br>t;<br>p.Leu453Me<br>t             | 0  | FALSE | chr9:8736<br>6961:C:A       | 88:chr9:87<br>366961:C:<br>A   | 0.001756 |
| 73_c4-1 | 73 | IDH2            | MODERATE           | c.124A>G;<br>c.358A>G;<br>c.514A>G             | p.Arg42Gly;<br>p.Arg120Gly<br>;<br>p.Arg172Gly  | 19 | FALSE | chr15:906<br>31839:T:C      | 88:chr15:9<br>0631839:T<br>:C  | 0.00191  |
| 73_c4-1 | 73 | NTRK3           | MODERATE           | c.1071G>T                                      | p.Glu357As<br>p                                 | 0  | FALSE | chr15:886<br>78465:C:A      | 88:chr15:8<br>8678465:C<br>:A  | 0.001787 |
| 73_c4-1 | 73 | NF1             | HIGH               | c.5401C>T;<br>c.5464C>T                        | p.Gln1801*;<br>p.Gln1822*                       | 1  | FALSE | chr17:296<br>54712:C:T      | 88:chr17:2<br>9654712:C<br>:T  | 0.00166  |
| 73_c4-1 | 73 | HRAS;<br>LRRC56 | MODERATE; MODIFIER | c.351G>T;<br>c.-506C>A                         | p.Lys117Asn<br>;                                | 3  | FALSE | chr11:533<br>552:C:A        | 88:chr11:5<br>33552:C:A        | 0.003135 |
| 73_c4-1 | 73 | PTEN            | MODERATE           | c.404T>C                                       | p.Ile135Thr                                     | 4  | FALSE | chr10:896<br>92920:T:C      | 88:chr10:8<br>9692920:T<br>:C  | 0.001712 |
| 73_c4-1 | 73 | PDGFRA          | MODERATE           | c.1499G>A                                      | p.Arg500Gln                                     | 1  | FALSE | chr4:5513<br>9838:G:A       | 88:chr4:55<br>139838:G:<br>A   | 0.00177  |
| 73_c4-1 | 73 | AKT1            | MODERATE           | c.932G>A                                       | p.Gly311Asp                                     | 1  | FALSE | chr14:105<br>239613:C:<br>T | 88:chr14:1<br>05239613:<br>C:T | 0.002703 |
| 73_c4-1 | 73 | IGF1R           | MODERATE           | c.2425G>A                                      | p.Glu809Lys                                     | 0  | FALSE | chr15:994<br>65600:G:A      | 88:chr15:9<br>9465600:G<br>:A  | 0.00191  |

|         |    |                    |                    |                                                                                               |                                                                         |   |       |                        |                               |          |
|---------|----|--------------------|--------------------|-----------------------------------------------------------------------------------------------|-------------------------------------------------------------------------|---|-------|------------------------|-------------------------------|----------|
| 73_c4-1 | 73 | C9orf53;<br>CDKN2A | MODIFIER; MODERATE | n.*616C>A<br>; c.*20G>T;<br>c.*299G>T<br>; c.376G>T                                           | p.Val126Phe                                                             | 2 | FALSE | chr9:2197<br>0982:C:A  | 88:chr9:21<br>970982:C:<br>A  | 0.002141 |
| 73_c4-1 | 73 | EGFR;<br>EGFR-AS1  | MODERATE; MODIFIER | c.2492G>A<br>; n.-1C>T                                                                        | p.Arg831His                                                             | 4 | FALSE | chr7:5525<br>9434:G:A  | 88:chr7:55<br>259434:G:<br>A  | 0.003083 |
| 73_c4-1 | 73 | CTNNB1             | MODERATE           | c.134C>A                                                                                      | p.Ser45Tyr                                                              | 0 | FALSE | chr3:4126<br>6137:C:A  | 88:chr3:41<br>266137:C:<br>A  | 0.001667 |
| 73_c4-1 | 73 | TP53               | MODIFIER; MODERATE | c.*137A>G<br>;<br>c.*225A>G<br>;<br>c.1001A>G<br>;<br>c.1118A>G<br>;<br>c.641A>G;<br>c.722A>G | p.Lys334Arg<br>;<br>p.Lys373Arg<br>;<br>p.Lys214Arg<br>;<br>p.Lys241Arg | 1 | FALSE | chr17:757<br>2991:T:C  | 88:chr17:7<br>572991:T:<br>C  | 0.002833 |
| 73_c4-1 | 73 | MIR4673;<br>NOTCH1 | MODIFIER; MODERATE | n.*59A>C;<br>; c.1195A>C                                                                      | p.Thr399Pro                                                             | 0 | FALSE | chr9:1394<br>12649:T:G | 88:chr9:13<br>9412649:T<br>:G | 0.00601  |
| 73_c4-1 | 73 | SMO                | MODERATE           | c.1045A>C                                                                                     | p.Thr349Pro                                                             | 0 | FALSE | chr7:1288<br>46115:A:C | 88:chr7:12<br>8846115:A<br>:C | 0.006228 |
| 73_c4-1 | 73 | C9orf53;<br>CDKN2A | MODIFIER; MODERATE | n.*616C>A<br>;<br>c.*266G>T<br>;<br>c.343G>T;<br>c.386G>T                                     | p.Val115Leu<br>;<br>p.Arg129Leu                                         | 4 | FALSE | chr9:2197<br>1015:C:A  | 88:chr9:21<br>971015:C:<br>A  | 0.002191 |
| 73_c4-1 | 73 | KIT                | MODERATE           | c.1485C>A                                                                                     | p.Asn495Lys                                                             | 1 | FALSE | chr4:5559<br>2161:C:A  | 88:chr4:55<br>592161:C:<br>A  | 0.001859 |
| 73_c4-1 | 73 | TSC2               | MODERATE           | c.1381G>A                                                                                     | p.Val461Met                                                             | 0 | FALSE | chr16:211<br>2992:G:A  | 88:chr16:2<br>112992:G:<br>A  | 0.00226  |
| 73_c4-1 | 73 | TP53               | MODERATE           | c.200G>A;<br>c.281G>A;<br>c.560G>A;<br>c.677G>A                                               | p.Gly67Asp;<br>p.Gly94Asp;<br>p.Gly187Asp<br>;<br>p.Gly226Asp           | 5 | FALSE | chr17:757<br>7604:C:T  | 88:chr17:7<br>577604:C:<br>T  | 0.001671 |
| 73_c4-1 | 73 | HRAS;<br>LRRCS6    | MODERATE; MODIFIER | c.305G>T;<br>c.-506C>A                                                                        | p.Arg102Leu<br>;                                                        | 1 | FALSE | chr11:533<br>598:C:A   | 88:chr11:5<br>33598:C:A       | 0.002548 |

|         |    |                 |                    |                                                                                                              |                                                                                                                 |   |       |                             |                                |          |
|---------|----|-----------------|--------------------|--------------------------------------------------------------------------------------------------------------|-----------------------------------------------------------------------------------------------------------------|---|-------|-----------------------------|--------------------------------|----------|
| 73_c4-1 | 73 | FBXW7           | MODERATE           | c.1028G>T;<br>;<br>c.1268G>T;<br>; c.914G>T                                                                  | p.Gly343Val;<br>p.Gly423Val;<br>p.Gly305Val                                                                     | 0 | FALSE | chr4:1532<br>49510:C:A      | 88:chr4:15<br>3249510:C<br>:A  | 0.001864 |
| 73_c4-1 | 73 | CDH1            | MODERATE           | c.671G>A                                                                                                     | p.Arg224His                                                                                                     | 0 | FALSE | chr16:688<br>42735:G:A      | 88:chr16:6<br>8842735:G<br>:A  | 0.003027 |
| 73_c4-1 | 73 | PDGFRA          | MODERATE           | c.1198G>A                                                                                                    | p.Asp400As<br>n                                                                                                 | 1 | FALSE | chr4:5513<br>6876:G:A       | 88:chr4:55<br>136876:G:<br>A   | 0.001567 |
| 73_c4-1 | 73 | NF1             | MODERATE           | c.2573C>A                                                                                                    | p.Ser858Tyr                                                                                                     | 1 | FALSE | chr17:295<br>56206:C:A      | 88:chr17:2<br>9556206:C<br>:A  | 0.001881 |
| 73_c4-1 | 73 | ATM             | MODERATE           | c.1237C>A                                                                                                    | p.Leu413Ile                                                                                                     | 0 | FALSE | chr11:108<br>121429:C:<br>A | 88:chr11:1<br>08121429:<br>C:A | 0.00207  |
| 73_c4-1 | 73 | FBXW7           | MODERATE           | c.1178G>A;<br>;<br>c.824G>A;<br>; c.938G>A                                                                   | p.Arg393Gln<br>;<br>p.Arg275Gln<br>;<br>p.Arg313Gln                                                             | 0 | FALSE | chr4:1532<br>50882:C:T      | 88:chr4:15<br>3250882:C<br>:T  | 0.001715 |
| 73_c4-1 | 73 | FGFR1           | MODIFIER; MODERATE | c.-85G>T;<br>c.107G>T;<br>; c.8G>T                                                                           | ; p.Ser36Ile;<br>p.Ser3Ile                                                                                      | 1 | FALSE | chr8:3831<br>4957:C:A       | 88:chr8:38<br>314957:C:<br>A   | 0.00173  |
| 73_c4-1 | 73 | ALK             | MODERATE           | c.2077C>T                                                                                                    | p.Pro693Ser                                                                                                     | 1 | FALSE | chr2:2947<br>4098:G:A       | 88:chr2:29<br>474098:G:<br>A   | 0.00202  |
| 73_c4-1 | 73 | FGFR1           | MODERATE           | c.1033T>A;<br>;<br>c.1051T>A;<br>; c.1057T>A;<br>;<br>c.1150T>A;<br>; p.Ser262Thr<br>c.784T>A;<br>; c.790T>A | p.Ser345Thr<br>;<br>p.Ser351Thr<br>;<br>p.Ser353Thr<br>;<br>p.Ser384Thr<br>;<br>p.Ser262Thr<br>;<br>p.Ser264Thr | 1 | FALSE | chr8:3827<br>9339:A:T       | 88:chr8:38<br>279339:A:<br>T   | 0.002033 |
| 73_c4-1 | 73 | HRAS;<br>LRRCS6 | HIGH; MODIFIER     | c.403C>T;<br>c.-506G>A                                                                                       | p.Arg135*;<br>;                                                                                                 | 1 | FALSE | chr11:533<br>500:G:A        | 88:chr11:5<br>33500:G:A        | 0.002053 |
| 73_c4-1 | 73 | TP53            | MODIFIER; MODERATE | c.-36G>T;<br>c.325G>T;<br>; c.442G>T;<br>; c.46G>T                                                           | p.Asp109Tyr<br>;<br>p.Asp148Tyr<br>; p.Asp16Tyr                                                                 | 5 | FALSE | chr17:757<br>8488:C:A       | 88:chr17:7<br>578488:C:<br>A   | 0.002137 |
| 73_c4-1 | 73 | KDR             | MODERATE           | c.1051C>T                                                                                                    | p.Pro351Ser                                                                                                     | 1 | FALSE | chr4:5597<br>6861:G:A       | 88:chr4:55<br>976861:G:<br>A   | 0.001225 |
| 73_c4-1 | 73 | CTNNB1          | MODERATE           | c.861C>A                                                                                                     | p.Asn287Lys                                                                                                     | 0 | FALSE | chr3:4126<br>7277:C:A       | 88:chr3:41<br>267277:C:<br>A   | 0.001807 |

|         |    |                             |                    |                                                                                                    |                                                                                   |    |       |                             |                                |          |
|---------|----|-----------------------------|--------------------|----------------------------------------------------------------------------------------------------|-----------------------------------------------------------------------------------|----|-------|-----------------------------|--------------------------------|----------|
| 73_c4-1 | 73 | NTRK3                       | MODERATE           | c.2110G>T;<br>;<br>c.2134G>T;<br>;<br>c.2176G>T                                                    | p.Val704Leu<br>;<br>p.Val712Leu<br>;<br>p.Val726Leu                               | 0  | FALSE | chr15:884<br>23659:C:A      | 88:chr15:8<br>8423659:C<br>:A  | 0.004115 |
| 73_c4-1 | 73 | ALK                         | MODERATE           | c.4192C>T                                                                                          | p.Pro1398Ser                                                                      | 1  | FALSE | chr2:2941<br>6761:G:A       | 88:chr2:29<br>416761:G<br>:A   | 0.001969 |
| 73_c4-1 | 73 | TP53                        | MODIFIER; MODERATE | c.-3G>T;<br>;<br>c.358G>T;<br>;<br>c.475G>T;<br>;<br>c.79G>T                                       | p.Ala120Ser;<br>;<br>p.Ala159Ser;<br>;<br>p.Ala27Ser                              | 23 | FALSE | chr17:757<br>8455:C:A       | 88:chr17:7<br>578455:C<br>:A   | 0.002    |
| 73_c4-1 | 73 | PIK3CA                      | MODERATE           | c.1727C>A                                                                                          | p.Ser576Tyr                                                                       | 1  | FALSE | chr3:1789<br>37046:C:A      | 88:chr3:17<br>8937046:C<br>:A  | 0.001932 |
| 73_c4-1 | 73 | MITF                        | MODERATE           | c.157A>C;<br>;<br>c.265A>C;<br>;<br>c.310A>C;<br>;<br>c.313A>C                                     | p.Thr53Pro;<br>;<br>p.Thr89Pro;<br>;<br>p.Thr104Pro<br>;<br>;<br>p.Thr105Pro      | 0  | FALSE | chr3:6992<br>8493:A:C       | 88:chr3:69<br>928493:A<br>:C   | 0.001759 |
| 73_c4-1 | 73 | ERBB2;<br>MIEN1;<br>MIR4728 | MODERATE; MODIFIER | c.2261G>A<br>;<br>c.2306G>A<br>;<br>c.2351G>A<br>;<br>n.2675G>A<br>;<br>c.*388C>T;<br>;<br>n.-1G>A | p.Arg754His<br>;<br>;<br>p.Arg769His<br>;<br>;<br>p.Arg784His<br>;<br>;           | 1  | FALSE | chr17:378<br>81022:G:A      | 88:chr17:3<br>7881022:G<br>:A  | 0.001616 |
| 73_c4-1 | 73 | NTRK1                       | MODERATE           | c.415G>A;<br>;<br>c.505G>A                                                                         | p.Gly139Arg<br>;<br>;<br>p.Gly169Arg                                              | 1  | FALSE | chr1:1568<br>37972:G:A      | 88:chr1:15<br>6837972:G<br>:A  | 0.001944 |
| 73_c4-1 | 73 | TP53                        | MODERATE           | c.261G>T;<br>;<br>c.342G>T;<br>;<br>c.621G>T;<br>;<br>c.738G>T                                     | p.Met87Ile;<br>;<br>p.Met114Ile<br>;<br>;<br>p.Met207Ile<br>;<br>;<br>p.Met246Ile | 21 | FALSE | chr17:757<br>7543:C:A       | 88:chr17:7<br>577543:C<br>:A   | 0.002613 |
| 73_c4-1 | 73 | ATM                         | MODERATE           | c.1009C>T                                                                                          | p.Arg337Cys                                                                       | 0  | FALSE | chr11:108<br>117798:C<br>:T | 88:chr11:1<br>08117798:<br>C:T | 0.001592 |
| 94_bl-1 | 94 | C9orf53;<br>CDKN2A          | MODIFIER; MODERATE | n.*616C>T<br>;<br>;<br>c.*176G>A<br>;<br>;<br>c.253G>A;<br>;<br>c.296G>A                           | p.Ala85Thr;<br>;<br>p.Arg99His                                                    | 1  | FALSE | chr9:2197<br>1105:C:T       | 89:chr9:21<br>971105:C<br>:T   | 0.005405 |

|         |    |                             |                    |                                                                                                |                                                                |     |       |                          |                               |          |
|---------|----|-----------------------------|--------------------|------------------------------------------------------------------------------------------------|----------------------------------------------------------------|-----|-------|--------------------------|-------------------------------|----------|
| 94_bl-1 | 94 | PIK3CA                      | MODERATE           | c.1624G>A                                                                                      | p.Glu542Lys                                                    | 777 | FALSE | chr3:1789<br>36082:G:A   | 89:chr3:17<br>8936082:G<br>:A | 0.003906 |
| 94_bl-1 | 94 | NTRK1                       | MODERATE           | c.1940T>G<br>;<br>c.2030T>G<br>;<br>c.2048T>G                                                  | p.Val647Gly;<br>p.Val677Gly;<br>p.Val683Gly                    | 2   | FALSE | chr1:1568<br>49792:T:G   | 89:chr1:15<br>6849792:T<br>:G | 0.003663 |
| 94_bl-1 | 94 | ERBB2;<br>MIEN1;<br>MIR4728 | MODERATE; MODIFIER | c.2239G>C<br>;<br>c.2284G>C<br>;<br>c.2329G>C<br>;<br>n.2653G>C<br>;<br>c.*388C>G<br>; n.-1G>C | p.Val747Leu<br>;<br>p.Val762Leu<br>;<br>p.Val777Leu<br>;       | 9   | FALSE | chr17:378<br>81000:G:C   | 89:chr17:3<br>7881000:G<br>:C | 0.155689 |
| 94_bl-1 | 94 | RET                         | MODERATE           | c.1690A>C                                                                                      | p.Thr564Pro                                                    | 1   | FALSE | chr10:436<br>08342:A:C   | 89:chr10:4<br>3608342:A<br>:C | 0.006614 |
| 94_bl-1 | 94 | NTRK1                       | MODERATE           | c.804C>G;<br>c.894C>G                                                                          | p.His268Gln<br>;<br>p.His298Gln                                | 1   | FALSE | chr1:1568<br>43468:C:G   | 89:chr1:15<br>6843468:C<br>:G | 0.004651 |
| 94_bl-1 | 94 | TP53                        | MODIFIER; HIGH     | c.*113G>T<br>;<br>c.*25G>T;<br>c.1006G>T<br>;<br>c.529G>T;<br>c.610G>T;<br>c.889G>T            | p.Glu336*;<br>p.Glu177*;<br>p.Glu204*;<br>p.Glu297*            | 7   | FALSE | chr17:757<br>4021:C:A    | 89:chr17:7<br>574021:C:<br>A  | 0.002381 |
| 94_bl-1 | 94 | TP53                        | MODERATE           | c.137A>C;<br>c.416A>C;<br>c.533A>C;<br>c.56A>C                                                 | p.His46Pro;<br>p.His139Pro<br>;<br>p.His178Pro<br>; p.His19Pro | 10  | FALSE | chr17:757<br>8397:T:G    | 89:chr17:7<br>578397:T:<br>G  | 0.002301 |
| 94_bl-1 | 94 | PIK3CA                      | MODERATE           | c.2078G>A                                                                                      | p.Arg693His                                                    | 1   | FALSE | chr3:1789<br>38836:G:A   | 89:chr3:17<br>8938836:G<br>:A | 0.002581 |
| 94_bl-1 | 94 | IGF1R                       | MODERATE           | c.3934T>C;<br>c.3937T>C                                                                        | p.Ser1312Pr<br>o;<br>p.Ser1313Pr<br>o                          | 0   | FALSE | chr15:995<br>00504:T:C   | 89:chr15:9<br>9500504:T<br>:C | 0.003466 |
| 94_bl-1 | 94 | ALG10                       | MODERATE           | c.217A>G                                                                                       | p.Ile73Val                                                     | 0   | FALSE | chr12:341<br>4176942:A:G | 89:chr12:3<br>4176942:A<br>:G | 0.002053 |
| 94_bl-1 | 94 | NOTCH1                      | MODERATE           | c.3407G>T                                                                                      | p.Gly1136Val                                                   | 0   | FALSE | chr9:1394<br>02510:C:A   | 89:chr9:13<br>9402510:C<br>:A | 0.003552 |



|         |    |                   |                            |                                                                                 |                                                                                                                 |      |       |                             |                                |          |
|---------|----|-------------------|----------------------------|---------------------------------------------------------------------------------|-----------------------------------------------------------------------------------------------------------------|------|-------|-----------------------------|--------------------------------|----------|
| 94_bl-1 | 94 | PDGFRA            | MODERATE                   | c.1516C>A                                                                       | p.Leu506Ile                                                                                                     | 2    | FALSE | chr4:5513<br>9855:C:A       | 89:chr4:55<br>139855:C:<br>A   | 0.001951 |
| 94_bl-1 | 94 | ATM               | MODERATE                   | c.2803A>G                                                                       | p.Thr935Ala                                                                                                     | 0    | FALSE | chr11:108<br>139301:A:<br>G | 89:chr11:1<br>08139301:<br>A:G | 0.003958 |
| 94_bl-1 | 94 | FBXW7             | MODERATE                   | c.1078G>T<br>;<br>c.1318G>T<br>;<br>c.964G>T                                    | p.Asp360Tyr<br>;<br>p.Asp440Tyr<br>;<br>p.Asp322Tyr                                                             | 0    | FALSE | chr4:1532<br>49460:C:A      | 89:chr4:15<br>3249460:C<br>:A  | 0.005495 |
| 94_bl-1 | 94 | IGF1R             | MODERATE                   | c.167A>G                                                                        | p.Glu56Gly                                                                                                      | 0    | FALSE | chr15:992<br>50863:A:G      | 89:chr15:9<br>9250863:A<br>:G  | 0.001741 |
| 94_bl-1 | 94 | ERBB2;<br>MIR4728 | MODERATE; LOW;<br>MODIFIER | c.2215G>C<br>;<br>c.2260G>C<br>;<br>c.2305G>C<br>;<br>n.2629G>C<br>;<br>n.-1G>C | p.Asp739His<br>;<br>p.Asp754His<br>;<br>p.Asp769His<br>;                                                        | 5    | FALSE | chr17:378<br>80261:G:C      | 89:chr17:3<br>7880261:G<br>:C  | 0.195479 |
| 94_bl-1 | 94 | IDH1              | MODERATE                   | c.395G>T                                                                        | p.Arg132Leu                                                                                                     | 4157 | FALSE | chr2:2091<br>13112:C:A      | 89:chr2:20<br>9113112:C<br>:A  | 0.003937 |
| 94_bl-1 | 94 | FGFR1             | MODERATE                   | c.475C>T;<br>c.481C>T;<br>c.724C>T;<br>c.742C>T;<br>c.748C>T;<br>c.841C>T       | p.Arg159Trp<br>;<br>p.Arg161Trp<br>;<br>p.Arg242Trp<br>;<br>p.Arg248Trp<br>;<br>p.Arg250Trp<br>;<br>p.Arg281Trp | 2    | FALSE | chr8:3828<br>2215:G:A       | 89:chr8:38<br>282215:G:<br>A   | 0.001086 |
| 94_bl-1 | 94 | IGF1R             | MODERATE                   | c.676G>A                                                                        | p.Glu226Lys                                                                                                     | 0    | FALSE | chr15:994<br>34589:G:A      | 89:chr15:9<br>9434589:G<br>:A  | 0.00216  |
| 94_bl-1 | 94 | TP53              | MODERATE                   | c.361A>G;<br>c.442A>G;<br>c.721A>G;<br>c.838A>G                                 | p.Arg121Gly<br>;<br>p.Arg148Gly<br>;<br>p.Arg241Gly<br>;<br>p.Arg280Gly                                         | 24   | FALSE | chr17:757<br>7100:T:C       | 89:chr17:7<br>577100:T:<br>C   | 0.002384 |
| 94_bl-1 | 94 | RET               | MODERATE                   | c.1778G>A                                                                       | p.Gly593Glu                                                                                                     | 1    | FALSE | chr10:436<br>09022:G:A      | 89:chr10:4<br>3609022:G<br>:A  | 0.003221 |
| 94_bl-1 | 94 | TSC1              | MODERATE                   | c.2677G>A<br>;<br>c.2827G>A<br>;<br>c.2830G>A                                   | p.Ala893Thr<br>;<br>p.Ala943Thr<br>;<br>p.Ala944Thr                                                             | 0    | FALSE | chr9:1357<br>72716:C:T      | 89:chr9:13<br>5772716:C<br>:T  | 0.002907 |
| 94_bl-1 | 94 | KDR               | MODERATE                   | c.1699G>A                                                                       | p.Val567Met                                                                                                     | 1    | FALSE | chr4:5597<br>1098:C:T       | 89:chr4:55<br>971098:C:<br>T   | 0.00199  |

|           |    |                    |                    |                                                                              |                                                               |     |       |                        |                               |          |
|-----------|----|--------------------|--------------------|------------------------------------------------------------------------------|---------------------------------------------------------------|-----|-------|------------------------|-------------------------------|----------|
| 94_bl-1   | 94 | NF1                | HIGH               | c.4537C>T;<br>c.4600C>T                                                      | p.Arg1513*;<br>p.Arg1534*                                     | 9   | FALSE | chr17:295<br>88751:C:T | 89:chr17:2<br>9588751:C<br>:T | 0.002574 |
| 95_c1d1-1 | 95 | SMO                | MODERATE           | c.1045A>C                                                                    | p.Thr349Pro                                                   | 0   | FALSE | chr7:1288<br>46115:A:C | 90:chr7:12<br>8846115:A<br>:C | 0.00779  |
| 95_c1d1-1 | 95 | FGFR4              | MODIFIER; MODERATE | c.1098-<br>65G>A;<br>c.1251+10<br>G>A;<br>c.1067G>A                          | ; ;<br>p.Arg356His                                            | 1   | FALSE | chr5:1765<br>20342:G:A | 90:chr5:17<br>6520342:G<br>:A | 0.002086 |
| 95_c1d1-1 | 95 | TP53               | MODERATE           | c.128G>A;<br>c.407G>A;<br>c.47G>A;<br>c.524G>A                               | p.Arg43His;<br>p.Arg136His<br>;<br>p.Arg16His;<br>p.Arg175His | 979 | FALSE | chr17:757<br>8406:C:T  | 90:chr17:7<br>578406:C:<br>T  | 0.002191 |
| 95_c1d1-1 | 95 | ROS1               | MODERATE           | c.5412G>T                                                                    | p.Lys1804As<br>n                                              | 1   | FALSE | chr6:1176<br>47532:C:A | 90:chr6:11<br>7647532:C<br>:A | 0.003222 |
| 95_c1d1-1 | 95 | BRAF               | MODERATE           | c.914C>T                                                                     | p.Ala305Val                                                   | 2   | FALSE | chr7:1405<br>00228:G:A | 90:chr7:14<br>0500228:G<br>:A | 0.002242 |
| 95_c1d1-1 | 95 | EGFR               | MODERATE           | c.445C>T                                                                     | p.Arg149Trp                                                   | 1   | FALSE | chr7:5521<br>4319:C:T  | 90:chr7:55<br>214319:C:<br>T  | 0.002167 |
| 95_c1d1-1 | 95 | TP53               | MODERATE; MODIFIER | c.225G>T;<br>c.342G>T;<br>c.-279G>T;<br>c.-360G>T                            | p.Leu75Phe;<br>p.Leu114Ph<br>e;                               | 2   | FALSE | chr17:757<br>9345:C:A  | 90:chr17:7<br>579345:C:<br>A  | 0.002012 |
| 95_c1d1-1 | 95 | ERBB2;<br>MIR4728  | MODERATE; MODIFIER | c.2211C>G<br>;<br>c.2256C>G<br>;<br>c.2301C>G<br>;<br>n.2625C>G<br>; n.-1C>G | p.Ile737Met<br>;<br>p.Ile752Met<br>;<br>p.Ile767Met<br>;      | 6   | FALSE | chr17:378<br>80257:C:G | 90:chr17:3<br>7880257:C<br>:G | 0.002157 |
| 95_c1d1-1 | 95 | MIR4673;<br>NOTCH1 | MODIFIER; MODERATE | n.*59A>C;<br>c.1195A>C                                                       | ; ;<br>p.Thr399Pro                                            | 0   | FALSE | chr9:1394<br>12649:T:G | 90:chr9:13<br>9412649:T<br>:G | 0.006553 |
| 95_c1d1-1 | 95 | EGFR               | MODERATE           | c.1039G>A                                                                    | p.Asp347As<br>n                                               | 1   | FALSE | chr7:5522<br>4258:G:A  | 90:chr7:55<br>224258:G:<br>A  | 0.00227  |
| 95_c1d1-1 | 95 | STK11              | MODERATE           | c.622G>A                                                                     | p.Asp208As<br>n                                               | 1   | FALSE | chr19:122<br>0604:G:A  | 90:chr19:1<br>220604:G:<br>A  | 0.003012 |
| 95_c1d1-1 | 95 | CDKN2A             | MODIFIER; MODERATE | c.194-<br>3568A>C;<br>c.52A>C                                                | ; p.Thr18Pro                                                  | 1   | FALSE | chr9:2197<br>4775:T:G  | 90:chr9:21<br>974775:T:<br>G  | 0.004392 |

|           |    |                             |                            |                                                                                                |                                                          |      |       |                        |                               |          |
|-----------|----|-----------------------------|----------------------------|------------------------------------------------------------------------------------------------|----------------------------------------------------------|------|-------|------------------------|-------------------------------|----------|
| 95_c1d1-1 | 95 | MIR4673;<br>NOTCH1          | MODIFIER; MODERATE         | n.*59G>T;<br>c.1286G>T                                                                         | ; p.Cys429Phe                                            | 0    | FALSE | chr9:1394<br>12359:C:A | 90:chr9:13<br>9412359:C<br>:A | 0.004695 |
| 95_c1d1-1 | 95 | CWH43                       | MODERATE                   | c.737C>T;<br>c.818C>T                                                                          | p.Ala246Val;<br>p.Ala273Val                              | 0    | FALSE | chr4:4900<br>5767:C:T  | 90:chr4:49<br>005767:C:<br>T  | 0.001949 |
| 95_c1d1-1 | 95 | ERBB2;<br>MIEN1;<br>MIR4728 | MODERATE; MODIFIER         | c.2239G>C<br>;<br>c.2284G>C<br>;<br>c.2329G>C<br>;<br>n.2653G>C<br>;<br>c.*388C>G<br>; n.-1G>C | p.Val747Leu<br>;<br>p.Val762Leu<br>;<br>p.Val777Leu<br>; | 9    | FALSE | chr17:378<br>81000:G:C | 90:chr17:3<br>7881000:G<br>:C | 0.014418 |
| 95_c1d1-1 | 95 | PTEN                        | MODERATE                   | c.274G>T                                                                                       | p.Asp92Tyr                                               | 3    | FALSE | chr10:896<br>92790:G:T | 90:chr10:8<br>9692790:G<br>:T | 0.002564 |
| 95_c1d1-1 | 95 | NTRK3                       | HIGH                       | c.1768G>T<br>;<br>c.1792G>T                                                                    | p.Glu590*;<br>p.Glu598*                                  | 0    | FALSE | chr15:884<br>76340:C:A | 90:chr15:8<br>8476340:C<br>:A | 0.002594 |
| 95_c1d1-1 | 95 | PIK3CA                      | MODERATE                   | c.1633G>C                                                                                      | p.Glu545Gln                                              | 1189 | FALSE | chr3:1789<br>36091:G:C | 90:chr3:17<br>8936091:G<br>:C | 0.003254 |
| 95_c1d1-1 | 95 | C9orf53;<br>CDKN2A          | MODIFIER; MODERATE         | n.*616C>G<br>;<br>c.*140G>C<br>;<br>c.217G>C;<br>c.260G>C                                      | ; p.Ala73Pro;<br>p.Arg87Pro                              | 1    | FALSE | chr9:2197<br>1141:C:G  | 90:chr9:21<br>971141:C:<br>G  | 0.019856 |
| 95_c1d1-1 | 95 | TP53                        | HIGH                       | c.439C>T;<br>c.520C>T;<br>c.799C>T;<br>c.916C>T                                                | p.Arg147*;<br>p.Arg174*;<br>p.Arg267*;<br>p.Arg306*      | 167  | FALSE | chr17:757<br>7022:G:A  | 90:chr17:7<br>577022:G:<br>A  | 0.002183 |
| 95_c1d1-1 | 95 | TP53                        | MODIFIER; MODERATE         | c.-89T>C;<br>c.-8T>C;<br>c.272T>C;<br>c.389T>C                                                 | ; p.Leu91Pro;<br>p.Leu130Pro                             | 8    | FALSE | chr17:757<br>8541:A:G  | 90:chr17:7<br>578541:A:<br>G  | 0.002451 |
| 95_c1d1-1 | 95 | ERBB2;<br>MIR4728           | MODERATE; LOW;<br>MODIFIER | c.2215G>C<br>;<br>c.2260G>C<br>;<br>c.2305G>C<br>;<br>n.2629G>C<br>; n.-1G>C                   | p.Asp739His<br>;<br>p.Asp754His<br>;<br>p.Asp769His<br>; | 5    | FALSE | chr17:378<br>80261:G:C | 90:chr17:3<br>7880261:G<br>:C | 0.045055 |
| 95_c1d1-1 | 95 | CTNNB1                      | MODERATE                   | c.91C>A                                                                                        | p.Leu31Met                                               | 0    | FALSE | chr3:4126<br>6094:C:A  | 90:chr3:41<br>266094:C:<br>A  | 0.0022   |

|           |    |                   |                    |                                                                                                                                                            |                                                                                                                 |    |       |                     |                        |          |
|-----------|----|-------------------|--------------------|------------------------------------------------------------------------------------------------------------------------------------------------------------|-----------------------------------------------------------------------------------------------------------------|----|-------|---------------------|------------------------|----------|
| 95_c1d1-1 | 95 | RET               | MODERATE           | c.1690A>C                                                                                                                                                  | p.Thr564Pro                                                                                                     | 1  | FALSE | chr10:43608342:A:C  | 90:chr10:43608342:A:C  | 0.005482 |
| 95_c1d1-1 | 95 | TP53              | MODIFIER; MODERATE | c.-5G>T;<br>c.356G>T;<br>c.473G>T;<br>c.77G>T                                                                                                              | p.Arg119Leu<br>;<br>p.Arg158Leu<br>;<br>p.Arg26Leu                                                              | 80 | FALSE | chr17:7578457:C:A   | 90:chr17:7578457:C:A   | 0.003817 |
| 95_c1d1-1 | 95 | KIT               | MODERATE           | c.365G>A                                                                                                                                                   | p.Arg122His                                                                                                     | 1  | FALSE | chr4:55564477:G:A   | 90:chr4:55564477:G:A   | 0.001925 |
| 95_c1d1-1 | 95 | IGF1R             | MODERATE           | c.2824G>A<br>;<br>c.2827G>A                                                                                                                                | p.Ala942Thr<br>;<br>p.Ala943Thr                                                                                 | 0  | FALSE | chr15:99472831:G:A  | 90:chr15:99472831:G:A  | 0.001876 |
| 95_c1d1-1 | 95 | ATM               | MODERATE           | c.2611G>A                                                                                                                                                  | p.Glu871Lys                                                                                                     | 0  | FALSE | chr11:108138042:G:A | 90:chr11:108138042:G:A | 0.002134 |
| 95_c1d1-1 | 95 | IDH2;<br>ZNF710   | MODERATE; MODIFIER | c.1091C>T;<br>c.1247C>T;<br>c.857C>T;<br>c.*2147G>A                                                                                                        | p.Ala364Val;<br>p.Ala416Val;<br>p.Ala286Val;                                                                    | 1  | FALSE | chr15:90628072:G:A  | 90:chr15:90628072:G:A  | 0.002092 |
| 78_c4-1   | 78 | EGFR;<br>EGFR-AS1 | MODERATE; MODIFIER | c.2568T>G<br>; n.-1A>C                                                                                                                                     | p.Phe856Leu;                                                                                                    | 1  | FALSE | chr7:55259510:T:G   | 95:chr7:55259510:T:G   | 0.008584 |
| 78_c4-1   | 78 | IGF1R             | MODERATE           | c.3905T>C;<br>c.3908T>C                                                                                                                                    | p.Val1302Ala;<br>p.Val1303Ala                                                                                   | 0  | FALSE | chr15:99500475:T:C  | 95:chr15:99500475:T:C  | 0.00885  |
| 78_c4-1   | 78 | BRAF              | MODERATE           | c.2223G>T                                                                                                                                                  | p.Glu741Asp                                                                                                     | 1  | FALSE | chr7:140434475:C:A  | 95:chr7:140434475:C:A  | 0.009146 |
| 78_c4-1   | 78 | FGFR1;<br>LETM2   | MODERATE; MODIFIER | c.1927C>T;<br>c.1933C>T;<br>c.2170C>T;<br>c.2194C>T;<br>c.2200C>T;<br>c.2293C>T;<br>c.*1406G>A;<br>c.*1423G>A;<br>c.*1553G>A;<br>c.*1567G>A;<br>c.*1638G>A | p.Arg643Trp<br>;<br>p.Arg645Trp<br>;<br>p.Arg724Trp<br>;<br>p.Arg732Trp<br>;<br>p.Arg734Trp<br>;<br>p.Arg765Trp | 1  | FALSE | chr8:38271528:G:A   | 95:chr8:38271528:G:A   | 0.010256 |

|           |    |                    |                            |                                                                                                   |                                                                                                                 |    |       |                        |                               |          |
|-----------|----|--------------------|----------------------------|---------------------------------------------------------------------------------------------------|-----------------------------------------------------------------------------------------------------------------|----|-------|------------------------|-------------------------------|----------|
| 94_c2-1   | 94 | TP53               | MODIFIER; HIGH             | c.-55C>A;<br>c.27C>A;<br>c.306C>A;<br>c.423C>A                                                    | ; p.Cys9*;<br>p.Cys102*;<br>p.Cys141*                                                                           | 13 | FALSE | chr17:757<br>8507:G:T  | 96:chr17:7<br>578507:G:<br>T  | 0.103053 |
| 94_c2-1   | 94 | C9orf53;<br>CDKN2A | MODIFIER; MODERATE;<br>LOW | n.*616G>A<br>;<br>c.*228C>T;<br>c.305C>T;<br>c.348C>T                                             | ; p.Ala102Val;<br>p.Gly116Gly                                                                                   | 5  | FALSE | chr9:2197<br>1053:G:A  | 96:chr9:21<br>971053:G:<br>A  | 0.004405 |
| 51_t2c2-1 | 51 | NTRK3              | MODERATE                   | c.1393G>T<br>;<br>c.1417G>T                                                                       | p.Gly465Cys<br>;<br>p.Gly473Cys                                                                                 | 0  | FALSE | chr15:885<br>76256:C:A | 99:chr15:8<br>8576256:C<br>:A | 0.001439 |
| 51_t2c2-1 | 51 | GAPDH;<br>IFFO1    | MODERATE; MODIFIER         | c.591C>A;<br>c.717C>A;<br>c.*1743G><br>T;<br>c.*1746G><br>T;<br>c.*1770G><br>T;<br>n.*2798G><br>T | p.Asn197Lys<br>;<br>p.Asn239Lys<br>;                                                                            | 0  | FALSE | chr12:664<br>6941:C:A  | 99:chr12:6<br>646941:C:<br>A  | 0.000501 |
| 51_t2c2-1 | 51 | NOTCH1             | MODERATE                   | c.5806G>A                                                                                         | p.Ala1936Th<br>r                                                                                                | 0  | FALSE | chr9:1393<br>95132:C:T | 99:chr9:13<br>9395132:C<br>:T | 0.000821 |
| 51_t2c2-1 | 51 | FGFR1              | MODERATE                   | c.488G>T;<br>c.494G>T;<br>c.737G>T;<br>c.755G>T;<br>c.761G>T;<br>c.854G>T                         | p.Arg163Leu<br>;<br>p.Arg165Leu<br>;<br>p.Arg246Leu<br>;<br>p.Arg252Leu<br>;<br>p.Arg254Leu<br>;<br>p.Arg285Leu | 1  | FALSE | chr8:3828<br>2202:C:A  | 99:chr8:38<br>282202:C:<br>A  | 0.000925 |
| 51_t2c2-1 | 51 | CDH1               | MODERATE                   | c.856G>A                                                                                          | p.Ala286Thr                                                                                                     | 0  | FALSE | chr16:688<br>45610:G:A | 99:chr16:6<br>8845610:G<br>:A | 0.00065  |
| 51_t2c2-1 | 51 | TSC2               | HIGH                       | c.690C>A                                                                                          | p.Cys230*                                                                                                       | 0  | FALSE | chr16:210<br>6686:C:A  | 99:chr16:2<br>106686:C:<br>A  | 0.000479 |
| 51_t2c2-1 | 51 | FGFR3              | MODERATE                   | c.1183G>A<br>;<br>c.1519G>A<br>;<br>c.1525G>A                                                     | p.Val395Me<br>t;<br>p.Val507Me<br>t;<br>p.Val509Me<br>t                                                         | 1  | FALSE | chr4:1807<br>188:G:A   | 99:chr4:18<br>07188:G:A       | 0.000754 |

|           |    |                           |                    |                                                                                   |                                                             |    |       |                        |                               |          |
|-----------|----|---------------------------|--------------------|-----------------------------------------------------------------------------------|-------------------------------------------------------------|----|-------|------------------------|-------------------------------|----------|
| 51_t2c2-1 | 51 | TP53                      | MODIFIER; HIGH     | c.*143G>T;<br>; c.*55G>T;<br>c.1036G>T<br>;<br>c.559G>T;<br>c.640G>T;<br>c.919G>T | ; p.Glu346*;<br>p.Glu187*;<br>p.Glu214*;<br>p.Glu307*       | 4  | FALSE | chr17:757<br>3991:C:A  | 99:chr17:7<br>573991:C:<br>A  | 0.00132  |
| 51_t2c2-1 | 51 | PTEN                      | HIGH               | c.720C>A                                                                          | p.Tyr240*                                                   | 3  | FALSE | chr10:897<br>17695:C:A | 99:chr10:8<br>9717695:C<br>:A | 0.002786 |
| 51_t2c2-1 | 51 | PDGFRA                    | MODERATE           | c.1495G>A                                                                         | p.Val499Met                                                 | 2  | FALSE | chr4:5513<br>9834:G:A  | 99:chr4:55<br>139834:G:<br>A  | 0.00115  |
| 51_t2c2-1 | 51 | NOTCH1                    | MODERATE           | c.3407G>T                                                                         | p.Gly1136Val                                                | 0  | FALSE | chr9:1394<br>02510:C:A | 99:chr9:13<br>9402510:C<br>:A | 0.001135 |
| 51_t2c2-1 | 51 | CDKN2A                    | MODIFIER; MODERATE | c.194-<br>3567C>T;<br>c.53C>T                                                     | ; p.Thr18Met                                                | 1  | FALSE | chr9:2197<br>4774:G:A  | 99:chr9:21<br>974774:G:<br>A  | 0.001184 |
| 51_t2c2-1 | 51 | CDKN2B;<br>CDKN2B-<br>AS1 | MODIFIER; MODERATE | c.*221G>T<br>;<br>c.335G>T;<br>n.371+109<br>08C>A                                 | ; p.Trp112Leu                                               | 0  | FALSE | chr9:2200<br>6068:C:A  | 99:chr9:22<br>006068:C:<br>A  | 0.000607 |
| 51_t2c2-1 | 51 | RET                       | MODERATE           | c.1667C>A                                                                         | p.Ser556Tyr                                                 | 1  | FALSE | chr10:436<br>08319:C:A | 99:chr10:4<br>3608319:C<br>:A | 0.000559 |
| 51_t2c2-1 | 51 | EGFR                      | MODERATE           | c.664C>T                                                                          | p.Arg222Cys                                                 | 8  | FALSE | chr7:5522<br>0274:C:T  | 99:chr7:55<br>220274:C:<br>T  | 0.000917 |
| 51_t2c2-1 | 51 | TP53                      | MODERATE           | c.350C>T;<br>c.431C>T;<br>c.710C>T;<br>c.827C>T                                   | p.Ala117Val;<br>p.Ala144Val;<br>p.Ala237Val;<br>p.Ala276Val | 10 | FALSE | chr17:757<br>7111:G:A  | 99:chr17:7<br>577111:G:<br>A  | 0.001076 |
| 51_t2c2-1 | 51 | FGFR4                     | MODERATE           | c.1274G>A<br>;<br>c.1358G>A<br>;<br>c.1478G>A                                     | p.Arg425Gln<br>;<br>p.Arg453Gln<br>;<br>p.Arg493Gln         | 2  | FALSE | chr5:1765<br>20735:G:A | 99:chr5:17<br>6520735:G<br>:A | 0.000556 |
| 51_t2c2-1 | 51 | EGFR;<br>EGFR-AS1         | MODERATE; MODIFIER | c.2572C>A<br>; n.-1G>T                                                            | p.Leu858Met;                                                | 8  | FALSE | chr7:5525<br>9514:C:A  | 99:chr7:55<br>259514:C:<br>A  | 0.000536 |
| 51_t2c2-1 | 51 | EGFR;<br>EGFR-AS1         | MODERATE; MODIFIER | c.2441T>C;<br>n.1121A>G                                                           | p.Leu814Pro<br>;                                            | 4  | FALSE | chr7:5524<br>9143:T:C  | 99:chr7:55<br>249143:T:<br>C  | 0.000974 |
| 51_t2c2-1 | 51 | EGFR                      | MODERATE           | c.3025G>A                                                                         | p.Asp1009Asn                                                | 1  | FALSE | chr7:5526<br>8959:G:A  | 99:chr7:55<br>268959:G:<br>A  | 0.000808 |

|           |    |                    |                    |                                                           |                                                                |    |       |                             |                                |          |
|-----------|----|--------------------|--------------------|-----------------------------------------------------------|----------------------------------------------------------------|----|-------|-----------------------------|--------------------------------|----------|
| 51_t2c2-1 | 51 | MIR4673;<br>NOTCH1 | MODIFIER; MODERATE | n.*59A>G;<br>c.890A>G                                     | p.Asp297Gly                                                    | 0  | FALSE | chr9:1394<br>13252:T:C      | 99:chr9:13<br>9413252:T<br>:C  | 0.004591 |
| 51_t2c2-1 | 51 | ALK                | MODERATE           | c.536G>A                                                  | p.Arg179His                                                    | 1  | FALSE | chr2:3014<br>2990:C:T       | 99:chr2:30<br>142990:C:<br>T   | 0.000434 |
| 51_t2c2-1 | 51 | TP53               | MODIFIER; MODERATE | c.-66G>T;<br>c.16G>T;<br>c.295G>T;<br>c.412G>T            | p.Ala6Ser;<br>p.Ala99Ser;<br>p.Ala138Ser                       | 17 | FALSE | chr17:757<br>8518:C:A       | 99:chr17:7<br>578518:C:<br>A   | 0.000776 |
| 51_t2c2-1 | 51 | ATM                | MODERATE           | c.6751C>A                                                 | p.Leu2251I<br>le                                               | 0  | FALSE | chr11:108<br>196215:C:<br>A | 99:chr11:1<br>08196215:<br>C:A | 0.003617 |
| 51_t2c2-1 | 51 | NTRK2              | MODERATE           | c.1960C>A<br>;<br>c.2008C>A                               | p.Leu654Me<br>t;<br>p.Leu670Me<br>t                            | 0  | FALSE | chr9:8757<br>0268:C:A       | 99:chr9:87<br>570268:C:<br>A   | 0.001461 |
| 51_t2c2-1 | 51 | C9orf53;<br>CDKN2A | MODIFIER; MODERATE | n.*616C>A<br>;<br>c.*187G>T<br>;<br>c.264G>T;<br>c.307G>T | p.Glu88Asp;<br>p.Gly103Trp                                     | 6  | FALSE | chr9:2197<br>1094:C:A       | 99:chr9:21<br>971094:C:<br>A   | 0.000589 |
| 51_t2c2-1 | 51 | TP53               | MODIFIER; MODERATE | c.-3G>T;<br>c.358G>T;<br>c.475G>T;<br>c.79G>T             | p.Ala120Ser;<br>p.Ala159Ser;<br>p.Ala27Ser                     | 23 | FALSE | chr17:757<br>8455:C:A       | 99:chr17:7<br>578455:C:<br>A   | 0.001239 |
| 51_t2c2-1 | 51 | TSC1               | HIGH               | c.367G>T;<br>c.520G>T                                     | p.Glu123*;<br>p.Glu174*                                        | 0  | FALSE | chr9:1357<br>97349:C:A      | 99:chr9:13<br>5797349:C<br>:A  | 0.000809 |
| 51_t2c2-1 | 51 | NTRK1              | MODERATE           | c.804C>G;<br>c.894C>G                                     | p.His268Gln<br>;<br>p.His298Gln                                | 1  | FALSE | chr1:1568<br>43468:C:G      | 99:chr1:15<br>6843468:C<br>:G  | 0.001021 |
| 51_t2c2-1 | 51 | ATM                | MODERATE           | c.2542G>A                                                 | p.Glu848Lys                                                    | 0  | FALSE | chr11:108<br>137973:G:<br>A | 99:chr11:1<br>08137973:<br>G:A | 0.002478 |
| 51_t2c2-1 | 51 | TP53               | MODERATE; HIGH     | c.363G>T;<br>c.480G>T;<br>c.84G>T;<br>c.3G>T              | p.Met121Ile<br>;<br>p.Met160Ile<br>;<br>p.Met28Ile;<br>p.Met1? | 4  | FALSE | chr17:757<br>8450:C:A       | 99:chr17:7<br>578450:C:<br>A   | 0.000834 |
| 51_t2c2-1 | 51 | TP53               | MODERATE           | c.362G>T;<br>c.443G>T;<br>c.722G>T;<br>c.839G>T           | p.Arg121Ile;<br>p.Arg148Ile;<br>p.Arg241Ile;<br>p.Arg280Ile    | 64 | FALSE | chr17:757<br>7099:C:A       | 99:chr17:7<br>577099:C:<br>A   | 0.000697 |

|           |    |                             |                    |                                                                                    |                                       |   |       |                        |                               |          |
|-----------|----|-----------------------------|--------------------|------------------------------------------------------------------------------------|---------------------------------------|---|-------|------------------------|-------------------------------|----------|
| 51_t2c2-1 | 51 | MIR4673;<br>NOTCH1          | MODIFIER; MODERATE | n.*59G>A;<br>c.1775G>A                                                             | p.Arg592His                           | 0 | FALSE | chr9:1394<br>10063:C:T | 99:chr9:13<br>9410063:C<br>:T | 0.000667 |
| 51_t2c2-1 | 51 | SMO                         | MODERATE           | c.1640G>A                                                                          | p.Arg547His                           | 0 | FALSE | chr7:1288<br>50377:G:A | 99:chr7:12<br>8850377:G<br>:A | 0.000844 |
| 51_t2c2-1 | 51 | HGF                         | MODERATE           | c.685C>T;<br>c.700C>T                                                              | p.Arg229Cys<br>;<br>p.Arg234Cys       | 0 | FALSE | chr7:8137<br>4362:G:A  | 99:chr7:81<br>374362:G:<br>A  | 0.000852 |
| 51_t2c2-1 | 51 | FGFR3                       | MODIFIER; MODERATE | c.931-<br>417C>A;<br>c.1153C>A<br>;<br>c.1159C>A                                   | p.Leu385Me<br>t;<br>p.Leu387Me<br>t   | 1 | FALSE | chr4:1806<br>134:C:A   | 99:chr4:18<br>06134:C:A       | 0.001367 |
| 51_t2c2-1 | 51 | MIR4673;<br>NOTCH1          | MODIFIER; MODERATE | n.*59G>T;<br>c.778G>T                                                              | p.Asp260Tyr                           | 0 | FALSE | chr9:1394<br>13982:C:A | 99:chr9:13<br>9413982:C<br>:A | 0.000846 |
| 51_t2c2-1 | 51 | C9orf53;<br>CDKN2A          | MODIFIER; MODERATE | n.*616C>A<br>;<br>c.*269G>T<br>;<br>c.346G>T;<br>c.389G>T                          | p.Asp116Tyr<br>;<br>p.Gly130Val       | 3 | FALSE | chr9:2197<br>1012:C:A  | 99:chr9:21<br>971012:C:<br>A  | 0.000571 |
| 51_t2c2-1 | 51 | ERBB2;<br>MIEN1;<br>MIR4728 | MODIFIER; HIGH     | n.3151C>T<br>;<br>c.2737C>T;<br>c.2782C>T;<br>c.2827C>T;<br>c.*388G>A<br>; n.-1C>T | p.Gln913*;<br>p.Gln928*;<br>p.Gln943* | 1 | FALSE | chr17:378<br>82061:C:T | 99:chr17:3<br>7882061:C<br>:T | 0.000707 |
| 51_t2c2-1 | 51 | IGF1R                       | MODERATE           | c.2824G>A<br>;<br>c.2827G>A                                                        | p.Ala942Thr<br>;<br>p.Ala943Thr       | 0 | FALSE | chr15:994<br>72831:G:A | 99:chr15:9<br>9472831:G<br>:A | 0.000756 |
| 51_t2c2-1 | 51 | ALK                         | MODERATE           | c.584C>T                                                                           | p.Ala195Val                           | 1 | FALSE | chr2:3014<br>2942:G:A  | 99:chr2:30<br>142942:G:<br>A  | 0.000617 |
| 51_t2c2-1 | 51 | MET                         | MODERATE           | c.2908C>A<br>;<br>c.2962C>A                                                        | p.Arg970Ser<br>;<br>p.Arg988Ser       | 6 | FALSE | chr7:1164<br>11923:C:A | 99:chr7:11<br>6411923:C<br>:A | 0.001138 |
| 51_t2c2-1 | 51 | ALK                         | MODERATE           | c.1049C>T                                                                          | p.Ser350Leu                           | 1 | FALSE | chr2:2975<br>4886:G:A  | 99:chr2:29<br>754886:G:<br>A  | 0.000629 |
| 51_t2c2-1 | 51 | TSC2                        | MODERATE           | c.1610G>A                                                                          | p.Arg537His                           | 0 | FALSE | chr16:211<br>5530:G:A  | 99:chr16:2<br>115530:G:<br>A  | 0.000652 |



|           |    |        |                    |                                                                           |                                                                                                                 |    |       |                        |                               |          |
|-----------|----|--------|--------------------|---------------------------------------------------------------------------|-----------------------------------------------------------------------------------------------------------------|----|-------|------------------------|-------------------------------|----------|
| 51_t2c2-1 | 51 | IDH2   | MODERATE           | c.317C>T;<br>c.473C>T;<br>c.83C>T                                         | p.Pro106Leu<br>;<br>p.Pro158Leu<br>; p.Pro28Leu                                                                 | 2  | FALSE | chr15:906<br>31880:G:A | 99:chr15:9<br>0631880:G<br>:A | 0.000766 |
| 51_t2c2-1 | 51 | CDH1   | HIGH               | c.1596G>A                                                                 | p.Trp532*                                                                                                       | 0  | FALSE | chr16:688<br>53213:G:A | 99:chr16:6<br>8853213:G<br>:A | 0.00058  |
| 51_t2c2-1 | 51 | TP53   | MODIFIER; MODERATE | c.-11G>T;<br>c.350G>T;<br>c.467G>T;<br>c.71G>T                            | p.Arg117Leu<br>;<br>p.Arg156Leu<br>; p.Arg24Leu                                                                 | 26 | FALSE | chr17:757<br>8463:C:A  | 99:chr17:7<br>578463:C:<br>A  | 0.001247 |
| 51_t2c2-1 | 51 | EGFR   | MODERATE           | c.932G>A                                                                  | p.Cys311Tyr                                                                                                     | 1  | FALSE | chr7:5522<br>3565:G:A  | 99:chr7:55<br>223565:G:<br>A  | 0.000409 |
| 51_t2c2-1 | 51 | EPHA3  | HIGH               | c.1114C>T                                                                 | p.Gln372*                                                                                                       | 0  | FALSE | chr3:8939<br>1048:C:T  | 99:chr3:89<br>391048:C:<br>T  | 0.000626 |
| 51_t2c2-1 | 51 | CTNNB1 | MODERATE           | c.131C>A                                                                  | p.Pro44His                                                                                                      | 0  | FALSE | chr3:4126<br>6134:C:A  | 99:chr3:41<br>266134:C:<br>A  | 0.001119 |
| 51_t2c2-1 | 51 | FGFR1  | MODIFIER; MODERATE | c.-85G>T;<br>c.107G>T;<br>c.8G>T                                          | p.Ser36Ile;<br>p.Ser3Ile                                                                                        | 1  | FALSE | chr8:3831<br>4957:C:A  | 99:chr8:38<br>314957:C:<br>A  | 0.001303 |
| 51_t2c2-1 | 51 | FGFR1  | MODERATE           | c.475C>T;<br>c.481C>T;<br>c.724C>T;<br>c.742C>T;<br>c.748C>T;<br>c.841C>T | p.Arg159Trp<br>;<br>p.Arg161Trp<br>;<br>p.Arg242Trp<br>;<br>p.Arg248Trp<br>;<br>p.Arg250Trp<br>;<br>p.Arg281Trp | 2  | FALSE | chr8:3828<br>2215:G:A  | 99:chr8:38<br>282215:G:<br>A  | 0.001018 |
| 51_t2c2-1 | 51 | NTRK1  | MODERATE           | c.1007C>A<br>; c.917C>A                                                   | p.Ala336Glu<br>;<br>p.Ala306Glu                                                                                 | 3  | FALSE | chr1:1568<br>43581:C:A | 99:chr1:15<br>6843581:C<br>:A | 0.000788 |
| 51_t2c2-1 | 51 | PDGFRA | HIGH               | c.2540C>A                                                                 | p.Ser847*                                                                                                       | 1  | FALSE | chr4:5515<br>2108:C:A  | 99:chr4:55<br>152108:C:<br>A  | 0.000813 |
| 51_t2c2-1 | 51 | TP53   | MODERATE; MODIFIER | c.239C>T;<br>c.356C>T;<br>c.-279C>T;<br>c.-360C>T                         | p.Ala80Val;<br>p.Ala119Val;                                                                                     | 1  | FALSE | chr17:757<br>9331:G:A  | 99:chr17:7<br>579331:G:<br>A  | 0.000653 |
| 51_t2c2-1 | 51 | STK11  | MODERATE           | c.479T>C                                                                  | p.Leu160Pro                                                                                                     | 1  | FALSE | chr19:122<br>0386:T:C  | 99:chr19:1<br>220386:T:<br>C  | 0.001052 |
| 51_t2c2-1 | 51 | GNA11  | MODERATE           | c.1030G>A                                                                 | p.Val344Met                                                                                                     | 1  | FALSE | chr19:312<br>1127:G:A  | 99:chr19:3<br>121127:G:<br>A  | 0.000789 |

|           |    |                                      |                    |                                                                |                                                                         |   |       |                        |                                |          |
|-----------|----|--------------------------------------|--------------------|----------------------------------------------------------------|-------------------------------------------------------------------------|---|-------|------------------------|--------------------------------|----------|
| 51_t2c2-1 | 51 | PIK3R1                               | MODERATE           | c.1030G>T<br>;<br>c.1120G>T<br>;<br>c.1930G>T<br>;<br>c.841G>T | p.Gly344Cys<br>;<br>p.Gly374Cys<br>;<br>p.Gly644Cys<br>;<br>p.Gly281Cys | 1 | FALSE | chr5:6759<br>2114:G:T  | 99:chr5:67<br>592114:G:<br>T   | 0.000652 |
| 51_t2c2-1 | 51 | KIT                                  | MODERATE           | c.235C>A                                                       | p.Gln79Lys                                                              | 2 | FALSE | chr4:5556<br>1845:C:A  | 99:chr4:55<br>561845:C:<br>A   | 0.002139 |
| 51_t2c2-1 | 51 | FGFR3                                | MODIFIER; MODERATE | c.931-<br>308G>A;<br>;<br>c.1262G>A<br>;<br>c.1268G>A          | p.Arg421Gln<br>;<br>p.Arg423Gln                                         | 1 | FALSE | chr4:1806<br>243:G:A   | 99:chr4:18<br>06243:G:A        | 0.000852 |
| 51_t2c2-1 | 51 | MAP2K1                               | MODERATE           | c.371C>T                                                       | p.Pro124Leu                                                             | 1 | FALSE | chr15:667<br>29163:C:T | 99:chr15:6<br>6729163:C:<br>:T | 0.001046 |
| 51_t2c2-1 | 51 | EPHA3                                | MODERATE           | c.1280C>T                                                      | p.Ala427Val                                                             | 0 | FALSE | chr3:8939<br>1214:C:T  | 99:chr3:89<br>391214:C:<br>T   | 0.001038 |
| 51_t2c2-1 | 51 | BRAF                                 | HIGH               | c.37G>T                                                        | p.Glu13*                                                                | 2 | FALSE | chr7:1406<br>24467:C:A | 99:chr7:14<br>0624467:C:<br>:A | 0.001005 |
| 51_t2c2-1 | 51 | IDH1                                 | MODERATE           | c.299G>T                                                       | p.Arg100Leu                                                             | 5 | FALSE | chr2:2091<br>13208:C:A | 99:chr2:20<br>9113208:C:<br>:A | 0.001382 |
| 51_t2c2-1 | 51 | FGFR3                                | MODERATE           | c.1162G>A<br>;<br>c.1498G>A<br>;<br>c.1504G>A                  | p.Ala388Thr<br>;<br>p.Ala500Thr<br>;<br>p.Ala502Thr                     | 1 | FALSE | chr4:1807<br>167:G:A   | 99:chr4:18<br>07167:G:A        | 0.002761 |
| 51_t2c2-1 | 51 | KIT                                  | MODERATE           | c.1403C>T                                                      | p.Pro468Leu                                                             | 2 | FALSE | chr4:5559<br>2079:C:T  | 99:chr4:55<br>592079:C:<br>T   | 0.000757 |
| 51_t2c2-1 | 51 | PDGFRA                               | MODERATE           | c.1526C>A                                                      | p.Ala509Asp                                                             | 1 | FALSE | chr4:5513<br>9865:C:A  | 99:chr4:55<br>139865:C:<br>A   | 0.001491 |
| 51_t2c2-1 | 51 | EGFR                                 | MODIFIER; MODERATE | c.*1464C><br>T;<br>c.1279C>T                                   | p.Arg427Cys                                                             | 2 | FALSE | chr7:5522<br>5427:C:T  | 99:chr7:55<br>225427:C:<br>T   | 0.00052  |
| 51_t2c2-1 | 51 | DDR2                                 | MODERATE           | c.1598C>A                                                      | p.Thr533Lys                                                             | 1 | FALSE | chr1:1627<br>41907:C:A | 99:chr1:16<br>2741907:C:<br>:A | 0.002294 |
| 51_t2c2-1 | 51 | MIR4674;<br>MIR4674H<br>G;<br>NOTCH1 | MODIFIER; MODERATE | n.*87G>T;<br>n.-1C>A;<br>c.62G>T                               | p.Gly21Val                                                              | 0 | FALSE | chr9:1394<br>38554:C:A | 99:chr9:13<br>9438554:C:<br>:A | 0.003177 |
| 51_t2c2-1 | 51 | TSC2                                 | HIGH               | c.3280C>T;<br>c.3412C>T                                        | p.Arg1094*;<br>p.Arg1138*                                               | 0 | FALSE | chr16:213<br>0180:C:T  | 99:chr16:2<br>130180:C:<br>T   | 0.000616 |

|           |    |                           |                    |                                               |                                             |   |       |                        |                              |          |
|-----------|----|---------------------------|--------------------|-----------------------------------------------|---------------------------------------------|---|-------|------------------------|------------------------------|----------|
| 51_t2c2-1 | 51 | FGFR3                     | MODERATE           | c.1177G>A;<br>c.1513G>A;<br>c.1519G>A         | p.Val393Ile;<br>p.Val505Ile;<br>p.Val507Ile | 1 | FALSE | chr4:1807<br>182:G>A   | 99:chr4:18<br>07182:G>A      | 0.000756 |
| 51_t2c2-1 | 51 | NTHL1;<br>TSC2            | MODIFIER; MODERATE | c.-20C>T;<br>c.170G>A                         | p.Arg57His                                  | 0 | FALSE | chr16:210<br>0432:G>A  | 99:chr16:2<br>100432:G<br>A  | 0.000962 |
| 51_t2c2-1 | 51 | CTNNB1                    | MODERATE           | c.2217G>A                                     | p.Met739Ile                                 | 0 | FALSE | chr3:4128<br>0704:G>A  | 99:chr3:41<br>280704:G<br>A  | 0.000852 |
| 51_t2c2-1 | 51 | TSC2                      | MODERATE           | c.1654G>A                                     | p.Ala552Thr                                 | 0 | FALSE | chr16:211<br>5574:G>A  | 99:chr16:2<br>115574:G<br>A  | 0.000725 |
| 51_t2c2-1 | 51 | HGF                       | MODERATE           | c.767G>A;<br>c.782G>A                         | p.Arg256His<br>;<br>p.Arg261His             | 0 | FALSE | chr7:8137<br>2752:C>T  | 99:chr7:81<br>372752:C<br>T  | 0.000531 |
| 51_t2c2-1 | 51 | CDKN2B;<br>CDKN2B-<br>AS1 | MODIFIER; MODERATE | c.*253C>T;<br>c.367C>T;<br>n.371+108<br>76G>A | p.Arg123Trp                                 | 0 | FALSE | chr9:2200<br>6036:G>A  | 99:chr9:22<br>006036:G<br>A  | 0.000928 |
| 51_t2c2-1 | 51 | NF1                       | MODERATE           | c.5420G>A<br>;<br>c.5483G>A                   | p.Arg1807Gln;<br>p.Arg1828Gln               | 2 | FALSE | chr17:296<br>54731:G>A | 99:chr17:2<br>9654731:G<br>A | 0.00049  |
| 51_t2c2-1 | 51 | PHLPP1                    | MODERATE           | c.3298G>A                                     | p.Glu1100Lys                                | 0 | FALSE | chr18:606<br>12478:G>A | 99:chr18:6<br>0612478:G<br>A | 0.000666 |
| 51_t2c2-1 | 51 | BRAF                      | MODERATE           | c.2223G>T                                     | p.Glu741Asp                                 | 1 | FALSE | chr7:1404<br>34475:C>A | 99:chr7:14<br>0434475:C<br>A | 0.000523 |
| 51_t2c2-1 | 51 | MAP2K1                    | MODERATE           | c.198C>A                                      | p.Asp66Glu                                  | 4 | FALSE | chr15:667<br>27482:C>A | 99:chr15:6<br>6727482:C<br>A | 0.002366 |
| 51_t2c2-1 | 51 | SMO                       | MODERATE           | c.869G>A                                      | p.Arg290His                                 | 0 | FALSE | chr7:1288<br>45572:G>A | 99:chr7:12<br>8845572:G<br>A | 0.001016 |
| 51_t2c2-1 | 51 | EGFR                      | MODERATE           | c.1774G>A                                     | p.Val592Ile                                 | 1 | FALSE | chr7:5523<br>3024:G>A  | 99:chr7:55<br>233024:G<br>A  | 0.000831 |
| 51_t2c2-1 | 51 | NOTCH1                    | MODERATE           | c.5885G>A                                     | p.Arg1962His                                | 0 | FALSE | chr9:1393<br>95053:C>T | 99:chr9:13<br>9395053:C<br>T | 0.000802 |
| 51_t2c2-1 | 51 | EPHA3                     | MODERATE           | c.2275G>T                                     | p.Val759Leu                                 | 0 | FALSE | chr3:8948<br>0438:G>T  | 99:chr3:89<br>480438:G<br>T  | 0.00084  |
| 51_t2c2-1 | 51 | PDGFRA                    | MODERATE           | c.94C>A                                       | p.Pro32Thr                                  | 1 | FALSE | chr4:5512<br>7306:C>A  | 99:chr4:55<br>127306:C<br>A  | 0.000646 |
| 51_t2c2-1 | 51 | TSC2                      | MODERATE           | c.2513G>A                                     | p.Ser838Asn                                 | 0 | FALSE | chr16:212<br>4358:G>A  | 99:chr16:2<br>124358:G<br>A  | 0.000729 |
| 51_t2c2-1 | 51 | CTNNB1                    | LOW                | c.15T>C                                       | p.Ala5Ala                                   | 0 | FALSE | chr3:4126<br>6018:T>C  | 99:chr3:41<br>266018:T<br>C  | 0.001181 |

|           |    |                    |                    |                                                                              |                                                                                             |    |       |                    |                       |          |
|-----------|----|--------------------|--------------------|------------------------------------------------------------------------------|---------------------------------------------------------------------------------------------|----|-------|--------------------|-----------------------|----------|
| 51_t2c2-1 | 51 | NF1                | MODERATE           | c.6405C>A<br>;<br>c.6468C>A                                                  | p.Phe2135Leu;<br>p.Phe2156Leu                                                               | 1  | FALSE | chr17:29664426:C:A | 99:chr17:29664426:C:A | 0.001091 |
| 51_t2c2-1 | 51 | EPHA3              | HIGH               | c.2757G>A                                                                    | p.Trp919*                                                                                   | 0  | FALSE | chr3:89521680:G:A  | 99:chr3:89521680:G:A  | 0.000694 |
| 51_t2c2-1 | 51 | NOTCH1             | MODERATE           | c.5192C>T                                                                    | p.Pro1731Leu                                                                                | 0  | FALSE | chr9:139396916:G:A | 99:chr9:139396916:G:A | 0.003731 |
| 51_t2c2-1 | 51 | RET                | MODERATE           | c.2116G>A                                                                    | p.Val706Met                                                                                 | 2  | FALSE | chr10:43610164:G:A | 99:chr10:43610164:G:A | 0.00039  |
| 51_t2c2-1 | 51 | TSC2               | MODERATE           | c.2702G>A                                                                    | p.Arg901His                                                                                 | 0  | FALSE | chr16:2126131:G:A  | 99:chr16:2126131:G:A  | 0.000502 |
| 51_t2c2-1 | 51 | MIR4673;<br>NOTCH1 | MODIFIER; MODERATE | n.*59G>T;<br>c.1039G>T                                                       | p.Gly347Cys                                                                                 | 0  | FALSE | chr9:139413103:C:A | 99:chr9:139413103:C:A | 0.001035 |
| 51_t2c2-1 | 51 | FGFR1              | MODERATE           | c.1013C>T;<br>c.1019C>T;<br>c.1112C>T;<br>c.746C>T;<br>c.752C>T;<br>c.995C>T | p.Thr338Met;<br>p.Thr340Met;<br>p.Thr371Met;<br>p.Thr249Met;<br>p.Thr251Met;<br>p.Thr332Met | 2  | FALSE | chr8:38279377:G:A  | 99:chr8:38279377:G:A  | 0.0018   |
| 51_t2c2-1 | 51 | CTNNB1             | MODERATE           | c.122C>A                                                                     | p.Thr41Asn                                                                                  | 0  | FALSE | chr3:41266125:C:A  | 99:chr3:41266125:C:A  | 0.001418 |
| 51_t2c2-1 | 51 | PDGFRA             | MODERATE           | c.1471G>A                                                                    | p.Ala491Thr                                                                                 | 1  | FALSE | chr4:55139810:G:A  | 99:chr4:55139810:G:A  | 0.000553 |
| 51_t2c2-1 | 51 | EPHA3              | MODERATE           | c.1180G>A                                                                    | p.Val394Met                                                                                 | 0  | FALSE | chr3:89391114:G:A  | 99:chr3:89391114:G:A  | 0.000526 |
| 51_t2c2-1 | 51 | CDKN2A             | MODIFIER; MODERATE | c.194-3519C>T;<br>c.101C>T                                                   | p.Ala34Val                                                                                  | 2  | FALSE | chr9:21974726:G:A  | 99:chr9:21974726:G:A  | 0.000548 |
| 51_t2c2-1 | 51 | PIK3CA             | MODERATE           | c.2727C>A                                                                    | p.Phe909Leu                                                                                 | 1  | FALSE | chr3:178947852:C:A | 99:chr3:178947852:C:A | 0.002401 |
| 51_t2c2-1 | 51 | TP53               | HIGH               | c.16C>T;<br>c.376C>T;<br>c.493C>T;<br>c.97C>T                                | p.Gln6*;<br>p.Gln126*;<br>p.Gln165*;<br>p.Gln33*                                            | 33 | FALSE | chr17:7578437:G:A  | 99:chr17:7578437:G:A  | 0.000793 |
| 51_t2c2-1 | 51 | DDR2               | MODERATE           | c.2002C>T                                                                    | p.Arg668Cys                                                                                 | 2  | FALSE | chr1:162745587:C:T | 99:chr1:162745587:C:T | 0.000565 |
| 51_t2c2-1 | 51 | NTRK2              | MODERATE           | c.220G>A                                                                     | p.Ala74Thr                                                                                  | 0  | FALSE | chr9:87317081:G:A  | 99:chr9:87317081:G:A  | 0.001159 |

|           |    |                             |                    |                                                                                               |                                                                    |    |       |                        |                               |          |
|-----------|----|-----------------------------|--------------------|-----------------------------------------------------------------------------------------------|--------------------------------------------------------------------|----|-------|------------------------|-------------------------------|----------|
| 51_t2c2-1 | 51 | ERBB2;<br>MIEN1;<br>MIR4728 | MODERATE; MODIFIER | c.2236G>A<br>;<br>c.2281G>A<br>;<br>c.2326G>A<br>;<br>n.2650G>A<br>;<br>c.*388C>T;<br>n.-1G>A | p.Gly746Ser<br>;<br>p.Gly761Ser<br>;<br>p.Gly776Ser<br>;           | 5  | FALSE | chr17:378<br>80997:G:A | 99:chr17:3<br>7880997:G<br>:A | 0.000529 |
| 51_t2c2-1 | 51 | EGFR                        | MODIFIER; MODERATE | c.*2364G><br>A;<br>c.2104G>A                                                                  | p.Ala702Thr<br>;                                                   | 2  | FALSE | chr7:5524<br>1656:G:A  | 99:chr7:55<br>241656:G:<br>A  | 0.000469 |
| 51_t2c2-1 | 51 | TP53                        | MODERATE           | c.234G>T;<br>c.315G>T;<br>c.594G>T;<br>c.711G>T                                               | p.Met78Ile;<br>p.Met105Ile<br>;<br>p.Met198Ile<br>;<br>p.Met237Ile | 81 | FALSE | chr17:757<br>7570:C:A  | 99:chr17:7<br>577570:C:<br>A  | 0.000693 |
| 51_t2c2-1 | 51 | NTRK1                       | MODERATE           | c.1669C>T;<br>c.1759C>T;<br>c.1777C>T                                                         | p.Arg557Trp<br>;<br>p.Arg587Trp<br>;<br>p.Arg593Trp                | 1  | FALSE | chr1:1568<br>46336:C:T | 99:chr1:15<br>6846336:C<br>:T | 0.000576 |
| 51_t2c2-1 | 51 | EGFR                        | MODERATE           | c.442G>A                                                                                      | p.Val148Me<br>t                                                    | 1  | FALSE | chr7:5521<br>4316:G:A  | 99:chr7:55<br>214316:G:<br>A  | 0.000591 |
| 51_t2c2-1 | 51 | TP53                        | MODERATE; MODIFIER | c.132G>T;<br>c.15G>T; c.-<br>279G>T; c.-<br>360G>T                                            | p.Met44Ile;<br>p.Met5Ile;                                          | 1  | FALSE | chr17:757<br>9555:C:A  | 99:chr17:7<br>579555:C:<br>A  | 0.001034 |
| 51_t2c2-1 | 51 | TSC1                        | MODERATE           | c.2751G>T<br>;<br>c.2901G>T<br>;<br>c.2904G>T                                                 | p.Arg917Ser<br>;<br>p.Arg967Ser<br>;<br>p.Arg968Ser                | 0  | FALSE | chr9:1357<br>72642:C:A | 99:chr9:13<br>5772642:C<br>:A | 0.002556 |
| 51_t2c2-1 | 51 | EPHA3                       | MODERATE           | c.237C>A                                                                                      | p.Asn79Lys                                                         | 0  | FALSE | chr3:8925<br>9093:C:A  | 99:chr3:89<br>259093:C:<br>A  | 0.000771 |
| 51_t2c2-1 | 51 | ALK                         | MODERATE           | c.641G>A                                                                                      | p.Arg214His                                                        | 1  | FALSE | chr2:3014<br>2885:C:T  | 99:chr2:30<br>142885:C:<br>T  | 0.001283 |
| 51_t2c2-1 | 51 | IGF1R                       | MODERATE           | c.1940G>A                                                                                     | p.Arg647His                                                        | 0  | FALSE | chr15:994<br>59304:G:A | 99:chr15:9<br>9459304:G<br>:A | 0.000566 |
| 51_t2c2-1 | 51 | INSRR;<br>NTRK1             | MODERATE           | c.3385G>T<br>; c.53C>A                                                                        | p.Val1129Ph<br>e;<br>p.Thr18Lys                                    | 1  | FALSE | chr1:1568<br>11916:C:A | 99:chr1:15<br>6811916:C<br>:A | 0.000709 |

|           |    |                    |                            |                                                        |                              |    |       |                    |                       |          |
|-----------|----|--------------------|----------------------------|--------------------------------------------------------|------------------------------|----|-------|--------------------|-----------------------|----------|
| 51_t2c2-1 | 51 | CDKN2A             | MODIFIER; MODERATE         | c.194-3471A>G;<br>c.149A>G                             | ; p.Gln50Arg                 | 2  | FALSE | chr9:21974678:T:C  | 99:chr9:21974678:T:C  | 0.000525 |
| 51_t2c2-1 | 51 | EGFR               | MODIFIER; MODERATE         | c.*2133G>A;<br>c.*2364G>A;<br>c.2030G>A                | ; p.Arg677His                | 5  | FALSE | chr7:55240786:G:A  | 99:chr7:55240786:G:A  | 0.001411 |
| 51_t2c2-1 | 51 | DDR2               | MODERATE                   | c.1418G>A                                              | p.Arg473His                  | 2  | FALSE | chr1:162740216:G:A | 99:chr1:162740216:G:A | 0.000559 |
| 51_t2c2-1 | 51 | C9orf53;<br>CDKN2A | MODIFIER; MODERATE;<br>LOW | n.*616G>A;<br>;<br>c.*180C>T;<br>c.257C>T;<br>c.300C>T | ; p.Ala86Val;<br>p.Cys100Cys | 1  | FALSE | chr9:21971101:G:A  | 99:chr9:21971101:G:A  | 0.000596 |
| 51_t2c2-1 | 51 | EGFR;<br>EGFR-AS1  | MODERATE; MODIFIER         | c.2356G>A;<br>;<br>n.1206C>T                           | p.Val786Met;                 | 6  | FALSE | chr7:55249058:G:A  | 99:chr7:55249058:G:A  | 0.000652 |
| 51_t2c2-1 | 51 | PDGFRA             | MODERATE                   | c.1202C>A                                              | p.Ala401Asp                  | 1  | FALSE | chr4:55136880:C:A  | 99:chr4:55136880:C:A  | 0.002535 |
| 51_t2c2-1 | 51 | TSC2               | MODERATE                   | c.781C>T                                               | p.Arg261Trp                  | 0  | FALSE | chr16:2107112:C:T  | 99:chr16:2107112:C:T  | 0.000919 |
| 51_t2c2-1 | 51 | NOTCH1             | MODERATE                   | c.2524G>T                                              | p.Gly842Trp                  | 0  | FALSE | chr9:139405667:C:A | 99:chr9:139405667:C:A | 0.000807 |
| 51_t2c2-1 | 51 | CDKN2A             | MODIFIER; MODERATE         | c.194-3610G>T;<br>c.10G>T                              | ; p.Ala4Ser                  | 1  | FALSE | chr9:21974817:C:A  | 99:chr9:21974817:C:A  | 0.001667 |
| 51_t2c2-1 | 51 | MIR4673;<br>NOTCH1 | MODIFIER; MODERATE         | n.*59G>T;<br>;<br>c.1451G>T                            | ; p.Gly484Val                | 0  | FALSE | chr9:139411828:C:A | 99:chr9:139411828:C:A | 0.001002 |
| 51_t2c2-1 | 51 | BRAF               | MODERATE                   | c.1202C>T                                              | p.Thr401Ile                  | 1  | FALSE | chr7:140482933:G:A | 99:chr7:140482933:G:A | 0.000932 |
| 51_t2c2-1 | 51 | CTNNB1             | MODERATE                   | c.86C>A                                                | p.Ser29Tyr                   | 0  | FALSE | chr3:41266089:C:A  | 99:chr3:41266089:C:A  | 0.000718 |
| 51_t2c2-1 | 51 | KDR                | MODERATE                   | c.1876A>G                                              | p.Ile626Val                  | 1  | FALSE | chr4:55970921:T:C  | 99:chr4:55970921:T:C  | 0.000778 |
| 51_t2c2-1 | 51 | HRAS;<br>LRRC56    | MODERATE; MODIFIER         | c.183G>T;<br>c.-506C>A                                 | p.Gln61His;                  | 15 | FALSE | chr11:533873:C:A   | 99:chr11:533873:C:A   | 0.000538 |
| 51_t2c2-1 | 51 | EGFR               | MODERATE                   | c.594C>A                                               | p.Ser198Arg                  | 3  | FALSE | chr7:55219021:C:A  | 99:chr7:55219021:C:A  | 0.000567 |
| 51_t2c2-1 | 51 | EPHA3              | MODERATE                   | c.2662C>A                                              | p.Leu888Met                  | 0  | FALSE | chr3:8949492:C:A   | 99:chr3:8949492:C:A   | 0.001022 |
| 51_t2c2-1 | 51 | CDKN2A             | MODIFIER; HIGH             | c.194-3544G>T;<br>c.76G>T                              | ; p.Glu26*                   | 2  | FALSE | chr9:21974751:C:A  | 99:chr9:21974751:C:A  | 0.000579 |

|           |    |                    |                    |                                                                                   |                                                       |    |       |                        |                               |          |
|-----------|----|--------------------|--------------------|-----------------------------------------------------------------------------------|-------------------------------------------------------|----|-------|------------------------|-------------------------------|----------|
| 51_t2c2-1 | 51 | TP53               | MODIFIER; HIGH     | c.*122G>T;<br>; c.*34G>T;<br>c.1015G>T<br>;<br>c.538G>T;<br>c.619G>T;<br>c.898G>T | ; p.Glu339*;<br>p.Glu180*;<br>p.Glu207*;<br>p.Glu300* | 18 | FALSE | chr17:757<br>4012:C:A  | 99:chr17:7<br>574012:C:<br>A  | 0.000855 |
| 51_t2c2-1 | 51 | NOTCH1             | MODERATE           | c.4391G>T                                                                         | p.Ser1464Ile                                          | 0  | FALSE | chr9:1393<br>99957:C:A | 99:chr9:13<br>9399957:C<br>:A | 0.000596 |
| 51_t2c2-1 | 51 | MIR4673;<br>NOTCH1 | MODIFIER; MODERATE | n.-1G>T;<br>c.221G>T                                                              | ; p.Cys74Phe                                          | 0  | FALSE | chr9:1394<br>18351:C:A | 99:chr9:13<br>9418351:C<br>:A | 0.001295 |
| 51_t2c2-1 | 51 | IGF1R              | MODERATE           | c.880G>A                                                                          | p.Glu294Lys                                           | 0  | FALSE | chr15:994<br>34793:G:A | 99:chr15:9<br>9434793:G<br>:A | 0.001397 |
| 51_t2c2-1 | 51 | CTNNB1             | MODERATE           | c.96C>A                                                                           | p.Asp32Glu                                            | 0  | FALSE | chr3:4126<br>6099:C:A  | 99:chr3:41<br>266099:C:<br>A  | 0.000673 |
| 51_t2c2-1 | 51 | DDR2               | MODERATE           | c.2038C>T                                                                         | p.Arg680Cys                                           | 1  | FALSE | chr1:1627<br>45623:C:T | 99:chr1:16<br>2745623:C<br>:T | 0.000504 |
| 51_t2c2-1 | 51 | NTRK1              | MODERATE           | c.1709C>A<br>;<br>c.1799C>A<br>;<br>c.1817C>A                                     | p.Pro570His<br>;<br>p.Pro600His<br>;<br>p.Pro606His   | 1  | FALSE | chr1:1568<br>48925:C:A | 99:chr1:15<br>6848925:C<br>:A | 0.00048  |
| 51_t2c2-1 | 51 | AKT3               | MODERATE           | c.425G>T                                                                          | p.Arg142Ile                                           | 0  | FALSE | chr1:2438<br>09199:C:A | 99:chr1:24<br>3809199:C<br>:A | 0.004228 |
| 51_t2c2-1 | 51 | MIR4673;<br>NOTCH1 | MODIFIER; MODERATE | n.*59G>T;<br>c.1433G>T                                                            | ; p.Cys478Phe                                         | 0  | FALSE | chr9:1394<br>12212:C:A | 99:chr9:13<br>9412212:C<br>:A | 0.00072  |
| 51_t2c2-1 | 51 | TSC1               | MODERATE           | c.1433C>T;<br>c.1583C>T;<br>c.1586C>T                                             | p.Ala478Val;<br>p.Ala528Val;<br>p.Ala529Val           | 0  | FALSE | chr9:1357<br>81379:G:A | 99:chr9:13<br>5781379:G<br>:A | 0.000482 |
| 51_t2c2-1 | 51 | NOTCH1             | MODERATE           | c.4987C>T                                                                         | p.Arg1663Trp                                          | 0  | FALSE | chr9:1393<br>99156:G:A | 99:chr9:13<br>9399156:G<br>:A | 0.001068 |
| 51_t2c2-1 | 51 | EGFR;<br>EGFR-AS1  | LOW; MODIFIER      | c.2472C>A<br>; n.-1G>T                                                            | p.Gly824Gly<br>;                                      | 1  | FALSE | chr7:5525<br>9414:C:A  | 99:chr7:55<br>259414:C:<br>A  | 0.000701 |

|           |    |                    |                            |                                                                                 |                                                                                                                 |   |       |                       |                              |          |
|-----------|----|--------------------|----------------------------|---------------------------------------------------------------------------------|-----------------------------------------------------------------------------------------------------------------|---|-------|-----------------------|------------------------------|----------|
| 51_t2c2-1 | 51 | FGFR1              | MODERATE                   | c.1060C>T;<br>c.1066C>T;<br>c.1303C>T;<br>c.1327C>T;<br>c.1333C>T;<br>c.1426C>T | p.Arg354Trp<br>;<br>p.Arg356Trp<br>;<br>p.Arg435Trp<br>;<br>p.Arg443Trp<br>;<br>p.Arg445Trp<br>;<br>p.Arg476Trp | 2 | FALSE | chr8:3827<br>5843:G:A | 99:chr8:38<br>275843:G:<br>A | 0.000568 |
| 51_t2c2-1 | 51 | C9orf53;<br>CDKN2A | MODIFIER; MODERATE;<br>LOW | n.*616C>A<br>;<br>c.*262G>T<br>;<br>c.382G>T;<br>c.339G>T                       | p.Ala128Ser;<br>p.Leu113Le<br>u                                                                                 | 1 | FALSE | chr9:2197<br>1019:C:A | 99:chr9:21<br>971019:C:<br>A | 0.000571 |
| 51_t2c2-1 | 51 | TP53               | MODERATE                   | c.117G>T;<br>c.36G>T;<br>c.396G>T;<br>c.513G>T                                  | p.Glu39Asp;<br>p.Glu12Asp;<br>p.Glu132As<br>p;<br>p.Glu171As<br>p                                               | 2 | FALSE | chr17:757<br>8417:C:A | 99:chr17:7<br>578417:C:<br>A | 0.000762 |
| 51_t2c2-1 | 51 | ALK                | MODERATE                   | c.1316G>T                                                                       | p.Ser439Ile                                                                                                     | 1 | FALSE | chr2:2955<br>1314:C:A | 99:chr2:29<br>551314:C:<br>A | 0.000684 |
| 51_t2c2-1 | 51 | C9orf53;<br>CDKN2A | MODIFIER; MODERATE;<br>LOW | n.*616T>G<br>;<br>c.*120A>C<br>;<br>c.197A>C;<br>c.240A>C                       | p.His66Pro;<br>p.Pro80Pro                                                                                       | 1 | FALSE | chr9:2197<br>1161:T:G | 99:chr9:21<br>971161:T:<br>G | 0.003639 |
| 51_t2c2-1 | 51 | EGFR;<br>EGFR-AS1  | MODERATE; MODIFIER         | c.2387G>A<br>;<br>n.1175C>T                                                     | p.Gly796Asp<br>;                                                                                                | 3 | FALSE | chr7:5524<br>9089:G:A | 99:chr7:55<br>249089:G:<br>A | 0.000443 |
| 51_t2c2-1 | 51 | CWH43              | MODERATE                   | c.782G>A;<br>c.863G>A                                                           | p.Cys261Tyr<br>;<br>p.Cys288Tyr                                                                                 | 0 | FALSE | chr4:4900<br>5812:G:A | 99:chr4:49<br>005812:G:<br>A | 0.00056  |
| 51_t2c2-1 | 51 | CTNNB1             | MODERATE                   | c.643G>A                                                                        | p.Ala215Thr                                                                                                     | 0 | FALSE | chr3:4126<br>6972:G:A | 99:chr3:41<br>266972:G:<br>A | 0.000632 |
| 51_t2c2-1 | 51 | CTNNB1             | MODERATE                   | c.861C>A                                                                        | p.Asn287Lys                                                                                                     | 0 | FALSE | chr3:4126<br>7277:C:A | 99:chr3:41<br>267277:C:<br>A | 0.004673 |
| 51_t2c2-1 | 51 | EGFR               | MODERATE                   | c.445C>T                                                                        | p.Arg149Trp                                                                                                     | 1 | FALSE | chr7:5521<br>4319:C:T | 99:chr7:55<br>214319:C:<br>T | 0.000579 |
| 51_t2c2-1 | 51 | NTRK2              | MODERATE                   | c.2023C>T;<br>c.2071C>T                                                         | p.Arg675Cys<br>;<br>p.Arg691Cys                                                                                 | 0 | FALSE | chr9:8757<br>0331:C:T | 99:chr9:87<br>570331:C:<br>T | 0.000677 |



|           |    |                             |                            |                                                                                                    |                                                           |    |       |                     |                        |          |
|-----------|----|-----------------------------|----------------------------|----------------------------------------------------------------------------------------------------|-----------------------------------------------------------|----|-------|---------------------|------------------------|----------|
| 51_t2c2-1 | 51 | NOTCH1                      | MODERATE                   | c.6019G>A                                                                                          | p.Val2007Met                                              | 0  | FALSE | chr9:139393627:C:T  | 99:chr9:139393627:C:T  | 0.000546 |
| 51_t2c2-1 | 51 | STK11                       | MODERATE                   | c.644G>A                                                                                           | p.Gly215Asp                                               | 1  | FALSE | chr19:1220626:G:A   | 99:chr19:1220626:G:A   | 0.000754 |
| 51_t2c2-1 | 51 | ERBB2;<br>MIEN1;<br>MIR4728 | MODERATE; MODIFIER         | c.3025G>A;<br>;<br>c.3070G>A;<br>;<br>c.3115G>A;<br>;<br>n.3439G>A;<br>;<br>c.*388C>T;<br>n.*67G>A | p.Ala1009Thr;<br>p.Ala1024Thr;<br>p.Ala1039Thr;           | 2  | FALSE | chr17:37883212:G:A  | 99:chr17:37883212:G:A  | 0.001907 |
| 51_t2c2-1 | 51 | AKT1                        | MODERATE                   | c.1112C>T                                                                                          | p.Thr371Met                                               | 1  | FALSE | chr14:105239275:G:A | 99:chr14:105239275:G:A | 0.001068 |
| 51_t2c2-1 | 51 | NOTCH1                      | HIGH                       | c.2155G>T                                                                                          | p.Glu719*                                                 | 0  | FALSE | chr9:139409014:C:A  | 99:chr9:139409014:C:A  | 0.001402 |
| 51_t2c2-1 | 51 | C9orf53;<br>CDKN2A          | MODIFIER; MODERATE;<br>LOW | n.*616G>A;<br>;<br>c.*217C>T;;<br>c.337C>T;<br>c.294C>T                                            | p.Pro113Ser;<br>p.His98His                                | 1  | FALSE | chr9:21971064:G:A   | 99:chr9:21971064:G:A   | 0.000547 |
| 51_t2c2-1 | 51 | TP53                        | MODERATE                   | c.144G>T;<br>c.423G>T;<br>c.540G>T;<br>c.63G>T                                                     | p.Glu48Asp;<br>p.Glu141Asp;<br>p.Glu180Asp;<br>p.Glu21Asp | 5  | FALSE | chr17:7578390:C:A   | 99:chr17:7578390:C:A   | 0.001361 |
| 51_t2c2-1 | 51 | TP53                        | MODERATE; MODIFIER         | c.100G>T;<br>c.217G>T;<br>c.-279G>T;<br>c.-360G>T                                                  | p.Val34Leu;<br>p.Val73Leu;                                | 5  | FALSE | chr17:7579470:C:A   | 99:chr17:7579470:C:A   | 0.001608 |
| 51_t2c2-1 | 51 | RET                         | MODERATE                   | c.1867G>A                                                                                          | p.Glu623Lys                                               | 1  | FALSE | chr10:43609111:G:A  | 99:chr10:43609111:G:A  | 0.000714 |
| 51_t2c2-1 | 51 | TP53                        | LOW; MODIFIER;<br>MODERATE | c.-6C>T;<br>c.355C>T;<br>c.472C>T;<br>c.76C>T                                                      | p.Arg119Cys;<br>;<br>p.Arg158Cys;<br>p.Arg26Cys           | 17 | FALSE | chr17:7578458:G:A   | 99:chr17:7578458:G:A   | 0.001268 |
| 51_t2c2-1 | 51 | GNA11                       | MODERATE                   | c.88C>T                                                                                            | p.Arg30Trp                                                | 1  | FALSE | chr19:3094737:C:T   | 99:chr19:3094737:C:T   | 0.000913 |
| 51_t2c2-1 | 51 | NOTCH1                      | MODERATE                   | c.5272C>A                                                                                          | p.Arg1758Ser                                              | 0  | FALSE | chr9:139396836:G:T  | 99:chr9:139396836:G:T  | 0.000898 |

|           |    |        |                    |                                                                        |                                                          |   |       |                             |                                |          |
|-----------|----|--------|--------------------|------------------------------------------------------------------------|----------------------------------------------------------|---|-------|-----------------------------|--------------------------------|----------|
| 51_t2c2-1 | 51 | ALK    | MODERATE           | c.2629G>T                                                              | p.Ala877Ser                                              | 1 | FALSE | chr2:2945<br>5173:C:A       | 99:chr2:29<br>455173:C:<br>A   | 0.000658 |
| 51_t2c2-1 | 51 | TP53   | MODERATE; MODIFIER | c.236C>T;<br>c.353C>T;<br>c.-279C>T;<br>c.-360C>T                      | p.Thr79Ile;<br>p.Thr118Ile;                              | 4 | FALSE | chr17:757<br>9334:G:A       | 99:chr17:7<br>579334:G:<br>A   | 0.000652 |
| 51_t2c2-1 | 51 | TSC2   | MODIFIER; MODERATE | c.2837+11<br>08G>A;<br>c.2933G>A                                       | ; p.Arg978His                                            | 0 | FALSE | chr16:212<br>7694:G:A       | 99:chr16:2<br>127694:G:<br>A   | 0.001109 |
| 51_t2c2-1 | 51 | ERBB2  | MODERATE; MODIFIER | c.517C>T;<br>c.562C>T;<br>c.607C>T;<br>n.931C>T                        | p.Arg173Cys<br>;<br>p.Arg188Cys<br>;<br>p.Arg203Cys<br>; | 1 | FALSE | chr17:378<br>66098:C:T      | 99:chr17:3<br>7866098:C:<br>T  | 0.000504 |
| 51_t2c2-1 | 51 | VHL    | MODIFIER; MODERATE | c.341-<br>3257C>A;<br>c.357C>A                                         | ; p.Phe119Le<br>u                                        | 0 | FALSE | chr3:1018<br>8214:C:A       | 99:chr3:10<br>188214:C:<br>A   | 0.000647 |
| 51_t2c2-1 | 51 | NTRK1  | MODERATE           | c.1937G>A<br>;<br>c.2027G>A<br>;<br>c.2045G>A                          | p.Arg646His<br>;<br>p.Arg676His<br>;<br>p.Arg682His      | 1 | FALSE | chr1:1568<br>49153:G:A      | 99:chr1:15<br>6849153:G:<br>A  | 0.000565 |
| 51_t2c2-1 | 51 | ESR1   | MODERATE           | c.929C>T;<br>c.932C>T;<br>c.938C>T                                     | p.Thr310Me<br>t;<br>p.Thr311Me<br>t;<br>p.Thr313Me<br>t  | 0 | FALSE | chr6:1522<br>65479:C:T      | 99:chr6:15<br>2265479:C:<br>T  | 0.000449 |
| 51_t2c2-1 | 51 | KIT    | MODERATE           | c.1778C>A<br>;<br>c.1790C>A                                            | p.Ala593Asp<br>;<br>p.Ala597Asp                          | 1 | FALSE | chr4:5559<br>4004:C:A       | 99:chr4:55<br>594004:C:<br>A   | 0.000686 |
| 51_t2c2-1 | 51 | FGFR2  | MODIFIER; MODERATE | c.749-<br>4847G>T;<br>c.407G>T;<br>c.485G>T;<br>c.752G>T;<br>n.1054G>T | ; p.Arg136Leu<br>;<br>p.Arg162Leu<br>;<br>p.Arg251Leu    | 2 | FALSE | chr10:123<br>279680:C:<br>A | 99:chr10:1<br>23279680:<br>C:A | 0.00061  |
| 51_t2c2-1 | 51 | AKT1   | MODERATE           | c.361C>T                                                               | p.Arg121Trp                                              | 2 | FALSE | chr14:105<br>242063:G:<br>A | 99:chr14:1<br>05242063:<br>G:A | 0.000494 |
| 51_t2c2-1 | 51 | CTNNB1 | MODERATE           | c.134C>A                                                               | p.Ser45Tyr                                               | 0 | FALSE | chr3:4126<br>6137:C:A       | 99:chr3:41<br>266137:C:<br>A   | 0.001117 |

|           |    |        |                    |                                                                |                                                                         |    |       |                             |                                |          |
|-----------|----|--------|--------------------|----------------------------------------------------------------|-------------------------------------------------------------------------|----|-------|-----------------------------|--------------------------------|----------|
| 51_t2c2-1 | 51 | TP53   | HIGH               | c.142G>T;<br>c.421G>T;<br>c.538G>T;<br>c.61G>T                 | p.Glu48*;<br>p.Glu141*;<br>p.Glu180*;<br>p.Glu21*                       | 14 | FALSE | chr17:757<br>8392:C:A       | 99:chr17:7<br>578392:C:<br>A   | 0.000677 |
| 51_t2c2-1 | 51 | PIK3R1 | MODERATE           | c.1147G>A<br>;<br>c.1237G>A<br>;<br>c.2047G>A<br>;<br>c.958G>A | p.Glu383Lys<br>;<br>p.Glu413Lys<br>;<br>p.Glu683Lys<br>;<br>p.Glu320Lys | 2  | FALSE | chr5:6759<br>3301:G:A       | 99:chr5:67<br>593301:G:<br>A   | 0.000582 |
| 51_t2c2-1 | 51 | FGFR2  | MODERATE; MODIFIER | c.148C>T;<br>c.226C>T;<br>c.493C>T;<br>n.795C>T                | p.Arg50Trp;<br>p.Arg76Trp;<br>p.Arg165Trp<br>;                          | 1  | FALSE | chr10:123<br>310935:G:<br>A | 99:chr10:1<br>23310935:<br>G:A | 0.000667 |
| 51_t2c2-1 | 51 | RET    | MODERATE           | c.1665C>A                                                      | p.Phe555Le<br>u                                                         | 1  | FALSE | chr10:436<br>08317:C:A      | 99:chr10:4<br>3608317:C<br>:A  | 0.000569 |
| 51_t2c2-1 | 51 | PIK3CA | MODERATE           | c.478C>A                                                       | p.His160Asn                                                             | 1  | FALSE | chr3:1789<br>17603:C:A      | 99:chr3:17<br>8917603:C<br>:A  | 0.003373 |
| 51_t2c2-1 | 51 | KDR    | MODERATE           | c.3449G>T                                                      | p.Arg1150I<br>l<br>e                                                    | 1  | FALSE | chr4:5595<br>5096:C:A       | 99:chr4:55<br>955096:C:<br>A   | 0.001101 |
| 51_t2c2-1 | 51 | PIK3R1 | HIGH               | c.484C>T                                                       | p.Arg162*                                                               | 3  | FALSE | chr5:6756<br>9823:C:T       | 99:chr5:67<br>569823:C:<br>T   | 0.000939 |
| 51_t2c2-1 | 51 | PDGFRA | MODERATE           | c.3078C>A                                                      | p.Asp1026G<br>l<br>u                                                    | 1  | FALSE | chr4:5515<br>6677:C:A       | 99:chr4:55<br>156677:C:<br>A   | 0.000509 |
| 51_t2c2-1 | 51 | NTRK1  | MODERATE           | c.1478G>A<br>;<br>c.1568G>A<br>;<br>c.1586G>A                  | p.Cys493Tyr<br>;<br>p.Cys523Tyr<br>;<br>p.Cys529Tyr                     | 1  | FALSE | chr1:1568<br>45956:G:A      | 99:chr1:15<br>6845956:G<br>:A  | 0.000926 |
| 51_t2c2-1 | 51 | TP53   | MODERATE           | c.15G>T;<br>c.375G>T;<br>c.492G>T;<br>c.96G>T                  | p.Lys5Asn;<br>p.Lys125Asn<br>;<br>p.Lys164Asn<br>;<br>p.Lys32Asn        | 6  | FALSE | chr17:757<br>8438:C:A       | 99:chr17:7<br>578438:C:<br>A   | 0.000797 |
| 51_t2c2-1 | 51 | TP53   | MODIFIER; HIGH     | c.-48C>T;<br>c.313C>T;<br>c.34C>T;<br>c.430C>T                 | ; p.Gln105*;<br>p.Gln12*;<br>p.Gln144*                                  | 42 | FALSE | chr17:757<br>8500:G:A       | 99:chr17:7<br>578500:G:<br>A   | 0.001986 |
| 51_t2c2-1 | 51 | DDR2   | MODERATE           | c.1963G>A                                                      | p.Glu655Lys                                                             | 1  | FALSE | chr1:1627<br>45548:G:A      | 99:chr1:16<br>2745548:G<br>:A  | 0.000824 |

|           |    |                    |                            |                                                       |                                                    |    |       |                         |                            |          |
|-----------|----|--------------------|----------------------------|-------------------------------------------------------|----------------------------------------------------|----|-------|-------------------------|----------------------------|----------|
| 51_t2c2-1 | 51 | PDGFRA             | MODERATE                   | c.1516C>A                                             | p.Leu506Ile                                        | 2  | FALSE | chr4:5513<br>9855:C:A   | 99:chr4:55<br>139855:C:A   | 0.001213 |
| 51_t2c2-1 | 51 | PDGFRA             | MODERATE                   | c.1406T>C                                             | p.Val469Ala                                        | 1  | FALSE | chr4:5513<br>9745:T:C   | 99:chr4:55<br>139745:T:C   | 0.00065  |
| 51_t2c2-1 | 51 | AKT3               | MODERATE                   | c.1056G>T                                             | p.Glu352Asp                                        | 0  | FALSE | chr1:2437<br>16138:C:A  | 99:chr1:24<br>3716138:C:A  | 0.002367 |
| 51_t2c2-1 | 51 | EGFR               | MODIFIER; HIGH             | c.*1464C>T;<br>c.1591C>T                              | p.Arg531*                                          | 1  | FALSE | chr7:5522<br>9284:C:T   | 99:chr7:55<br>229284:C:T   | 0.000475 |
| 51_t2c2-1 | 51 | MIR4673;<br>NOTCH1 | MODIFIER; HIGH             | n.*59C>T;<br>c.1324C>T                                | p.Gln442*                                          | 0  | FALSE | chr9:1394<br>12321:G:A  | 99:chr9:13<br>9412321:G:A  | 0.000981 |
| 51_t2c2-1 | 51 | EGFR;<br>EGFR-AS1  | MODERATE; MODIFIER         | c.2336G>A<br>;<br>n.1226C>T                           | p.Gly779Asp                                        | 2  | FALSE | chr7:5524<br>9038:G:A   | 99:chr7:55<br>249038:G:A   | 0.000931 |
| 51_t2c2-1 | 51 | NOTCH1             | MODERATE                   | c.4045G>T                                             | p.Ala1349Ser                                       | 0  | FALSE | chr9:1394<br>00303:C:A  | 99:chr9:13<br>9400303:C:A  | 0.000765 |
| 51_t2c2-1 | 51 | VHL                | MODIFIER; MODERATE         | c.341-<br>3231T>C;<br>c.383T>C                        | p.Leu128Pro                                        | 0  | FALSE | chr3:1018<br>8240:T:C   | 99:chr3:10<br>188240:T:C   | 0.000718 |
| 51_t2c2-1 | 51 | FGFR4              | HIGH                       | c.1041G>A                                             | p.Trp347*                                          | 1  | FALSE | chr5:1765<br>19769:G:A  | 99:chr5:17<br>6519769:G:A  | 0.001042 |
| 51_t2c2-1 | 51 | TP53               | MODIFIER; MODERATE         | c.-5G>T;<br>c.356G>T;<br>c.473G>T;<br>c.77G>T         | p.Arg119Leu<br>;<br>p.Arg158Leu<br>;<br>p.Arg26Leu | 80 | FALSE | chr17:757<br>8457:C:A   | 99:chr17:7<br>578457:C:A   | 0.000841 |
| 51_t2c2-1 | 51 | HOXD-AS2;<br>HOXD8 | MODIFIER; MODERATE         | n.*692C>T<br>;<br>c.-123-<br>30G>A;<br>c.400G>A       | p.Ala134Thr                                        | 0  | FALSE | chr2:1769<br>95494:G:A  | 99:chr2:17<br>6995494:G:A  | 0.00106  |
| 51_t2c2-1 | 51 | BRAF               | HIGH                       | c.925G>T                                              | p.Glu309*                                          | 1  | FALSE | chr7:1405<br>00217:C:A  | 99:chr7:14<br>0500217:C:A  | 0.00088  |
| 51_t2c2-1 | 51 | ATM                | MODERATE                   | c.6200C>A                                             | p.Ala2067Asp                                       | 0  | FALSE | chr11:108<br>188101:C:A | 99:chr11:1<br>08188101:C:A | 0.003442 |
| 51_t2c2-1 | 51 | C9orf53;<br>CDKN2A | MODIFIER; MODERATE;<br>LOW | n.*616A>G<br>;<br>c.*111T>C;<br>c.188T>C;<br>c.231T>C | p.Leu63Pro;<br>p.Ala77Ala                          | 2  | FALSE | chr9:2197<br>1170:A:G   | 99:chr9:21<br>971170:A:G   | 0.000758 |
| 51_t2c2-1 | 51 | NOTCH1             | MODERATE                   | c.5720C>T                                             | p.Pro1907Leu                                       | 0  | FALSE | chr9:1393<br>95218:G:A  | 99:chr9:13<br>9395218:G:A  | 0.000887 |

|           |    |                    |                            |                                                           |                                             |   |       |                        |                                |          |
|-----------|----|--------------------|----------------------------|-----------------------------------------------------------|---------------------------------------------|---|-------|------------------------|--------------------------------|----------|
| 51_t2c2-1 | 51 | CDKN2A             | MODIFIER; HIGH             | c.194-3523G>T;<br>c.97G>T                                 | ; p.Glu33*                                  | 3 | FALSE | chr9:2197<br>4730:C:A  | 99:chr9:21<br>974730:C:<br>A   | 0.000829 |
| 51_t2c2-1 | 51 | C9orf53;<br>CDKN2A | MODIFIER; MODERATE         | n.*616C>G<br>;<br>c.*140G>C<br>;<br>c.217G>C;<br>c.260G>C | ; p.Ala73Pro;<br>p.Arg87Pro                 | 1 | FALSE | chr9:2197<br>1141:C:G  | 99:chr9:21<br>971141:C:<br>G   | 0.024716 |
| 51_t2c2-1 | 51 | C9orf53;<br>CDKN2A | MODIFIER; MODERATE         | n.*616C>A<br>;<br>c.*266G>T<br>;<br>c.343G>T;<br>c.386G>T | ; p.Val115Leu<br>;<br>p.Arg129Leu           | 4 | FALSE | chr9:2197<br>1015:C:A  | 99:chr9:21<br>971015:C:<br>A   | 0.000561 |
| 51_t2c2-1 | 51 | EGFR;<br>EGFR-AS1  | MODERATE; MODIFIER         | c.2432C>T;<br>n.1130G>A                                   | ; p.Ser811Phe                               | 1 | FALSE | chr7:5524<br>9134:C:T  | 99:chr7:55<br>249134:C:<br>T   | 0.0005   |
| 51_t2c2-1 | 51 | NOTCH1             | MODERATE                   | c.5777G>A                                                 | p.Arg192His                                 | 0 | FALSE | chr9:1393<br>95161:C:T | 99:chr9:13<br>9395161:C:<br>:T | 0.001166 |
| 51_t2c2-1 | 51 | TP53               | MODERATE; MODIFIER         | c.188C>T;<br>c.305C>T;<br>c.-279C>T;<br>c.-360C>T         | p.Thr63Ile;<br>p.Thr102Ile;                 | 7 | FALSE | chr17:757<br>9382:G:A  | 99:chr17:7<br>579382:G:<br>A   | 0.00121  |
| 51_t2c2-1 | 51 | EPHA3              | MODERATE                   | c.1132C>A                                                 | p.Pro378Thr                                 | 0 | FALSE | chr3:8939<br>1066:C:A  | 99:chr3:89<br>391066:C:<br>A   | 0.001417 |
| 51_t2c2-1 | 51 | C9orf53;<br>CDKN2A | MODIFIER; MODERATE;<br>LOW | n.*616A>G<br>;<br>c.*261T>C;<br>c.338T>C;<br>c.381T>C     | ; p.Leu113Pro<br>;<br>p.Ser127Ser           | 1 | FALSE | chr9:2197<br>1020:A:G  | 99:chr9:21<br>971020:A:<br>G   | 0.000582 |
| 51_t2c2-1 | 51 | FGFR3              | MODERATE                   | c.1552G>A<br>;<br>c.1888G>A<br>;<br>c.1894G>A             | p.Val518Met;<br>p.Val630Met;<br>p.Val632Met | 1 | FALSE | chr4:1807<br>829:G:A   | 99:chr4:18<br>07829:G:A        | 0.000845 |
| 51_t2c2-1 | 51 | SMO                | MODERATE                   | c.628G>A                                                  | p.Val210Met                                 | 0 | FALSE | chr7:1288<br>45134:G:A | 99:chr7:12<br>8845134:G:<br>:A | 0.0009   |
| 51_t2c2-1 | 51 | KDR                | MODERATE                   | c.2323G>T                                                 | p.Ala775Ser                                 | 1 | FALSE | chr4:5596<br>4914:C:A  | 99:chr4:55<br>964914:C:<br>A   | 0.002418 |
| 51_t2c2-1 | 51 | CTNNB1             | LOW                        | c.1956G>A                                                 | p.Ala652Ala                                 | 0 | FALSE | chr3:4127<br>8080:G:A  | 99:chr3:41<br>278080:G:<br>A   | 0.000835 |
| 51_t2c2-1 | 51 | RET                | MODERATE                   | c.1574G>A                                                 | p.Arg525Gln                                 | 1 | FALSE | chr10:436<br>07598:G:A | 99:chr10:4<br>3607598:G:<br>:A | 0.000434 |

|           |    |                             |                    |                                                                               |                                                             |   |       |                    |                       |          |
|-----------|----|-----------------------------|--------------------|-------------------------------------------------------------------------------|-------------------------------------------------------------|---|-------|--------------------|-----------------------|----------|
| 51_t2c2-1 | 51 | KDR                         | MODERATE           | c.3433G>A                                                                     | p.Gly1145Arg                                                | 4 | FALSE | chr4:55955112:C:T  | 99:chr4:55955112:C:T  | 0.000595 |
| 51_t2c2-1 | 51 | NTRK2                       | MODERATE           | c.1925G>A;<br>c.1973G>A                                                       | p.Gly642Asp;<br>p.Gly658Asp                                 | 0 | FALSE | chr9:87570233:G:A  | 99:chr9:87570233:G:A  | 0.000663 |
| 51_t2c2-1 | 51 | IDH1                        | MODERATE           | c.766G>T                                                                      | p.Ala256Ser                                                 | 2 | FALSE | chr2:209106802:C:A | 99:chr2:209106802:C:A | 0.000583 |
| 51_t2c2-1 | 51 | ERBB2;<br>MIEN1;<br>MIR4728 | MODERATE; MODIFIER | c.2600G>A;<br>c.2645G>A;<br>c.2690G>A;<br>n.3014G>A;<br>c.*388C>T;<br>n.-1G>A | p.Arg867Gln;<br>p.Arg882Gln;<br>p.Arg897Gln                 | 2 | FALSE | chr17:37881620:G:A | 99:chr17:37881620:G:A | 0.000664 |
| 51_t2c2-1 | 51 | EGFR;<br>EGFR-AS1           | MODERATE; MODIFIER | c.2381C>A;<br>n.1181G>T                                                       | p.Pro794His                                                 | 1 | FALSE | chr7:55249083:C:A  | 99:chr7:55249083:C:A  | 0.000668 |
| 51_t2c2-1 | 51 | MAP2K1                      | MODERATE           | c.316G>A                                                                      | p.Ala106Thr                                                 | 1 | FALSE | chr15:66729108:G:A | 99:chr15:66729108:G:A | 0.001675 |
| 51_t2c2-1 | 51 | PHLPP1                      | HIGH               | c.2179C>T                                                                     | p.Arg727*                                                   | 0 | FALSE | chr18:60562356:C:T | 99:chr18:60562356:C:T | 0.000536 |
| 51_t2c2-1 | 51 | HGF                         | MODERATE           | c.490G>T;<br>c.505G>T                                                         | p.Gly164Cys;<br>p.Gly169Cys                                 | 0 | FALSE | chr7:81381556:C:A  | 99:chr7:81381556:C:A  | 0.000848 |
| 51_t2c2-1 | 51 | PIK3R1                      | MODERATE           | c.825C>A                                                                      | p.Phe275Leu                                                 | 1 | FALSE | chr5:67576546:C:A  | 99:chr5:67576546:C:A  | 0.003851 |
| 51_t2c2-1 | 51 | TP53                        | MODERATE           | c.438G>T;<br>c.519G>T;<br>c.798G>T;<br>c.915G>T                               | p.Lys146Asn;<br>p.Lys173Asn;<br>p.Lys266Asn;<br>p.Lys305Asn | 3 | FALSE | chr17:7577023:C:A  | 99:chr17:7577023:C:A  | 0.001169 |
| 51_t2c2-1 | 51 | TP53                        | MODIFIER; MODERATE | c.*137A>G;<br>c.*225A>G;<br>c.1001A>G;<br>c.1118A>G;<br>c.641A>G;<br>c.722A>G | p.Lys334Arg;<br>p.Lys373Arg;<br>p.Lys214Arg;<br>p.Lys241Arg | 1 | FALSE | chr17:7572991:T:C  | 99:chr17:7572991:T:C  | 0.001818 |
| 51_t2c2-1 | 51 | ZNF716                      | MODERATE           | c.32G>A                                                                       | p.Arg11Gln                                                  | 0 | FALSE | chr7:57510026:G:A  | 99:chr7:57510026:G:A  | 0.000586 |

|           |    |                           |                    |                                                                 |                                                                         |       |       |                        |                               |          |
|-----------|----|---------------------------|--------------------|-----------------------------------------------------------------|-------------------------------------------------------------------------|-------|-------|------------------------|-------------------------------|----------|
| 51_t2c2-1 | 51 | VHL                       | MODIFIER; MODERATE | c.341-3270A>C;<br>c.344A>C                                      | ; p.His115Pro                                                           | 0     | FALSE | chr3:1018<br>8201:A:C  | 99:chr3:10<br>188201:A:<br>C  | 0.001037 |
| 51_t2c2-1 | 51 | KRAS                      | MODERATE           | c.35G>A                                                         | p.Gly12Asp                                                              | 11213 | FALSE | chr12:253<br>98284:C:T | 99:chr12:2<br>5398284:C<br>:T | 0.42663  |
| 51_t2c2-1 | 51 | PIK3R1                    | MODERATE           | c.1082G>A<br>;<br>c.1271G>A<br>;<br>c.1361G>A<br>;<br>c.2171G>A | p.Arg361Gln<br>;<br>p.Arg424Gln<br>;<br>p.Arg454Gln<br>;<br>p.Arg724Gln | 1     | FALSE | chr5:6759<br>3425:G:A  | 99:chr5:67<br>593425:G:<br>A  | 0.000748 |
| 51_t2c2-1 | 51 | BRAF                      | MODERATE           | c.146A>T                                                        | p.Asn49Ile                                                              | 1     | FALSE | chr7:1405<br>50005:T:A | 99:chr7:14<br>0550005:T<br>:A | 0.00311  |
| 51_t2c2-1 | 51 | EPHA3                     | HIGH               | c.318C>A                                                        | p.Cys106*                                                               | 0     | FALSE | chr3:8925<br>9174:C:A  | 99:chr3:89<br>259174:C:<br>A  | 0.001121 |
| 51_t2c2-1 | 51 | NTRK1                     | MODERATE           | c.1751G>A<br>;<br>c.1841G>A<br>;<br>c.1859G>A                   | p.Gly584Asp<br>;<br>p.Gly614Asp<br>;<br>p.Gly620Asp                     | 1     | FALSE | chr1:1568<br>48967:G:A | 99:chr1:15<br>6848967:G<br>:A | 0.001007 |
| 51_t2c2-1 | 51 | SMO                       | MODERATE           | c.1193G>A                                                       | p.Arg398Gln                                                             | 0     | FALSE | chr7:1288<br>46357:G:A | 99:chr7:12<br>8846357:G<br>:A | 0.000448 |
| 51_t2c2-1 | 51 | DDR2                      | MODERATE           | c.2255G>A                                                       | p.Arg752His                                                             | 1     | FALSE | chr1:1627<br>46132:G:A | 99:chr1:16<br>2746132:G<br>:A | 0.000664 |
| 51_t2c2-1 | 51 | CDKN2B;<br>CDKN2B-<br>AS1 | MODERATE; MODIFIER | c.19G>T;<br>n.371+137<br>74C>A                                  | p.Gly7Cys;                                                              | 0     | FALSE | chr9:2200<br>8934:C:A  | 99:chr9:22<br>008934:C:<br>A  | 0.000713 |
| 51_t2c2-1 | 51 | EPHA3                     | HIGH               | c.1515C>A                                                       | p.Tyr505*                                                               | 0     | FALSE | chr3:8944<br>8551:C:A  | 99:chr3:89<br>448551:C:<br>A  | 0.000855 |
| 51_t2c2-1 | 51 | FGFR4                     | MODIFIER; MODERATE | c.1098-<br>65G>A;<br>c.1251+10<br>G>A;<br>c.1067G>A             | ; p.Arg356His                                                           | 1     | FALSE | chr5:1765<br>20342:G:A | 99:chr5:17<br>6520342:G<br>:A | 0.001187 |
| 51_t2c2-1 | 51 | SMO                       | HIGH               | c.871C>T                                                        | p.Arg291*                                                               | 0     | FALSE | chr7:1288<br>45574:C:T | 99:chr7:12<br>8845574:C<br>:T | 0.000407 |
| 51_t2c2-1 | 51 | TP53                      | MODERATE; MODIFIER | c.167C>T;<br>c.284C>T;<br>c.-279C>T;<br>c.-360C>T               | p.Ser56Phe;<br>p.Ser95Phe;                                              | 3     | FALSE | chr17:757<br>9403:G:A  | 99:chr17:7<br>579403:G:<br>A  | 0.000904 |
| 51_t2c2-1 | 51 | CTNNB1                    | MODERATE           | c.91C>A                                                         | p.Leu31Met                                                              | 0     | FALSE | chr3:4126<br>6094:C:A  | 99:chr3:41<br>266094:C:<br>A  | 0.001718 |

|           |    |                             |                    |                                                                                          |                                                          |   |       |                             |                                |          |
|-----------|----|-----------------------------|--------------------|------------------------------------------------------------------------------------------|----------------------------------------------------------|---|-------|-----------------------------|--------------------------------|----------|
| 51_t2c2-1 | 51 | IGF1R                       | MODERATE           | c.3613G>A;<br>;<br>c.3616G>A                                                             | p.Ala1205Thr;<br>p.Ala1206Thr                            | 0 | FALSE | chr15:994<br>91831:G:A      | 99:chr15:9<br>9491831:G<br>:A  | 0.001294 |
| 51_t2c2-1 | 51 | NOTCH1                      | MODERATE           | c.2806G>T                                                                                | p.Gly936Cys                                              | 0 | FALSE | chr9:1394<br>04348:C:A      | 99:chr9:13<br>9404348:C<br>:A  | 0.000541 |
| 51_t2c2-1 | 51 | ERBB2;<br>MIEN1;<br>MIR4728 | MODERATE; MODIFIER | c.2597G>A<br>;<br>c.2642G>A<br>;<br>c.2687G>A<br>n.3011G>A<br>;<br>c.*388C>T;<br>n.-1G>A | p.Arg866His<br>;<br>p.Arg881His<br>;<br>p.Arg896His<br>; | 2 | FALSE | chr17:378<br>81617:G:A      | 99:chr17:3<br>7881617:G<br>:A  | 0.000664 |
| 51_t2c2-1 | 51 | TSC2                        | MODERATE           | c.3514C>A<br>;<br>c.3646C>A                                                              | p.Leu1172Ile;<br>p.Leu1216Ile                            | 0 | FALSE | chr16:213<br>1631:C:A       | 99:chr16:2<br>131631:C:<br>A   | 0.001194 |
| 51_t2c2-1 | 51 | STK11                       | HIGH               | c.996G>A                                                                                 | p.Trp332*                                                | 2 | FALSE | chr19:122<br>3059:G:A       | 99:chr19:1<br>223059:G:<br>A   | 0.001038 |
| 51_t2c2-1 | 51 | NOTCH1                      | MODERATE           | c.4984C>T                                                                                | p.Arg1662Trp                                             | 0 | FALSE | chr9:1393<br>99159:G:A      | 99:chr9:13<br>9399159:G<br>:A  | 0.000704 |
| 51_t2c2-1 | 51 | KRAS                        | HIGH               | c.292G>T                                                                                 | p.Glu98*                                                 | 1 | FALSE | chr12:253<br>78706:C:A      | 99:chr12:2<br>5378706:C<br>:A  | 0.002821 |
| 51_t2c2-1 | 51 | FGFR2                       | MODIFIER; MODERATE | c.749-<br>4686G>T;<br>c.568G>T;<br>c.646G>T;<br>c.913G>T;<br>n.1215G>T                   | p.Gly190Trp<br>;<br>p.Gly216Trp<br>;<br>p.Gly305Trp      | 3 | FALSE | chr10:123<br>279519:C:<br>A | 99:chr10:1<br>23279519:<br>C:A | 0.00067  |
| 51_t2c2-1 | 51 | CTNNB1                      | MODERATE           | c.98C>A                                                                                  | p.Ser33Tyr                                               | 0 | FALSE | chr3:4126<br>6101:C:A       | 99:chr3:41<br>266101:C:<br>A   | 0.003012 |
| 51_t2c2-1 | 51 | FLT3                        | HIGH               | c.610G>T                                                                                 | p.Glu204*                                                | 0 | FALSE | chr13:286<br>26686:C:A      | 99:chr13:2<br>8626686:C<br>:A  | 0.000666 |
| 51_t2c2-1 | 51 | MIR4673;<br>NOTCH1          | MODIFIER; HIGH     | n.-1G>T;<br>c.574G>T                                                                     | p.Gly192*                                                | 0 | FALSE | chr9:1394<br>17470:C:A      | 99:chr9:13<br>9417470:C<br>:A  | 0.000726 |



|           |    |                    |                            |                                                                                   |                                                       |    |       |                        |                               |          |
|-----------|----|--------------------|----------------------------|-----------------------------------------------------------------------------------|-------------------------------------------------------|----|-------|------------------------|-------------------------------|----------|
| 51_t2c2-1 | 51 | TP53               | MODIFIER; HIGH             | c.*152G>T;<br>; c.*64G>T;<br>c.1045G>T<br>;<br>c.568G>T;<br>c.649G>T;<br>c.928G>T | ; p.Glu349*;<br>p.Glu190*;<br>p.Glu217*;<br>p.Glu310* | 13 | FALSE | chr17:757<br>3982:C:A  | 99:chr17:7<br>573982:C:<br>A  | 0.000765 |
| 51_t2c2-1 | 51 | C9orf53;<br>CDKN2A | MODIFIER; MODERATE;<br>LOW | n.*616C>A<br>;<br>c.*189G>T<br>;<br>c.266G>T;<br>c.309G>T                         | ; p.Gly89Val;<br>p.Gly103Gly                          | 3  | FALSE | chr9:2197<br>1092:C:A  | 99:chr9:21<br>971092:C:<br>A  | 0.000584 |
| 51_t2c2-1 | 51 | APC                | MODERATE                   | c.1771G>A<br>;<br>c.1825G>A                                                       | p.Val591Ile;<br>p.Val609Ile                           | 0  | FALSE | chr5:1121<br>70729:G:A | 99:chr5:11<br>2170729:G<br>:A | 0.002183 |
| 51_t2c2-1 | 51 | TP53               | MODERATE; MODIFIER         | c.170C>T;<br>c.287C>T;<br>c.-279C>T;<br>c.-360C>T                                 | p.Ser57Phe;<br>p.Ser96Phe;                            | 3  | FALSE | chr17:757<br>9400:G:A  | 99:chr17:7<br>579400:G:<br>A  | 0.000881 |
| 51_t2c2-1 | 51 | EGFR               | MODERATE                   | c.755G>A                                                                          | p.Arg252His                                           | 3  | FALSE | chr7:5522<br>1711:G:A  | 99:chr7:55<br>221711:G:<br>A  | 0.000553 |
| 51_t2c2-1 | 51 | IDH2               | MODIFIER; MODERATE         | c.-13G>T;<br>c.-17-<br>2869G>T;<br>c.144G>T                                       | ; p.Lys48Asn                                          | 2  | FALSE | chr15:906<br>34848:C:A | 99:chr15:9<br>0634848:C<br>:A | 0.001337 |
| 51_t2c2-1 | 51 | MET                | MODERATE                   | c.3731A>G<br>;<br>c.3785A>G                                                       | p.Lys1244Ar<br>g;<br>p.Lys1262Ar<br>g                 | 3  | FALSE | chr7:1164<br>23456:A:G | 99:chr7:11<br>6423456:A<br>:G | 0.001998 |
| 51_t2c2-1 | 51 | TP53               | HIGH                       | c.379G>T;<br>c.460G>T;<br>c.739G>T;<br>c.856G>T                                   | p.Glu127*;<br>p.Glu154*;<br>p.Glu247*;<br>p.Glu286*   | 82 | FALSE | chr17:757<br>7082:C:A  | 99:chr17:7<br>577082:C:<br>A  | 0.000702 |
| 51_t2c2-1 | 51 | PTEN               | MODERATE                   | c.914G>A                                                                          | p.Ser305Asn                                           | 1  | FALSE | chr10:897<br>20763:G:A | 99:chr10:8<br>9720763:G<br>:A | 0.008368 |

|           |    |                    |                            |                                                           |                                                                    |     |       |                        |                               |          |
|-----------|----|--------------------|----------------------------|-----------------------------------------------------------|--------------------------------------------------------------------|-----|-------|------------------------|-------------------------------|----------|
| 51_t2c2-1 | 51 | C9orf53;<br>CDKN2A | MODIFIER; HIGH; LOW        | n.*616G>A<br>;<br>c.*142C>T;<br>c.262C>T;<br>c.219C>T     | ; p.Arg88*;<br>p.Ala73Ala                                          | 1   | FALSE | chr9:2197<br>1139:G:A  | 99:chr9:21<br>971139:G:<br>A  | 0.000788 |
| 51_t2c2-1 | 51 | CTNNB1             | MODERATE                   | c.125C>A                                                  | p.Thr42Lys                                                         | 0   | FALSE | chr3:4126<br>6128:C:A  | 99:chr3:41<br>266128:C:<br>A  | 0.001074 |
| 51_t2c2-1 | 51 | C9orf53;<br>CDKN2A | MODIFIER; MODERATE;<br>LOW | n.*616C>T<br>;<br>c.*258G>A<br>;<br>c.335G>A;<br>c.378G>A | p.Arg112His<br>;<br>p.Pro126Pro                                    | 1   | FALSE | chr9:2197<br>1023:C:T  | 99:chr9:21<br>971023:C:<br>T  | 0.000864 |
| 51_t2c2-1 | 51 | INSRR;<br>NTRK1    | MODIFIER; MODERATE         | c.3397+28<br>C>T;<br>c.13G>A                              | ; p.Ala5Thr                                                        | 3   | FALSE | chr1:1568<br>11876:G:A | 99:chr1:15<br>6811876:G<br>:A | 0.000722 |
| 51_t2c2-1 | 51 | APC                | HIGH                       | c.350C>A;<br>c.380C>A                                     | p.Ser117*;<br>p.Ser127*                                            | 0   | FALSE | chr5:1121<br>03015:C:A | 99:chr5:11<br>2103015:C<br>:A | 0.002235 |
| 51_t2c2-1 | 51 | FBXW7              | MODERATE                   | c.314G>T;<br>c.428G>T;<br>c.668G>T                        | p.Arg105Leu<br>;<br>p.Arg143Leu<br>;<br>p.Arg223Leu                | 0   | FALSE | chr4:1532<br>68140:C:A | 99:chr4:15<br>3268140:C<br>:A | 0.000488 |
| 51_t2c2-1 | 51 | NTRK1              | MODERATE                   | c.1813C>A<br>t;<br>c.1903C>A<br>;<br>c.1921C>A            | p.Leu605Me<br>t;<br>p.Leu635Me<br>t;<br>p.Leu641Me<br>t            | 1   | FALSE | chr1:1568<br>49029:C:A | 99:chr1:15<br>6849029:C<br>:A | 0.000991 |
| 51_t2c2-1 | 51 | RET                | MODERATE                   | c.1901G>A                                                 | p.Cys634Tyr                                                        | 7   | FALSE | chr10:436<br>09949:G:A | 99:chr10:4<br>3609949:G<br>:A | 0.000417 |
| 51_t2c2-1 | 51 | TP53               | MODERATE                   | c.265C>T;<br>c.346C>T;<br>c.625C>T;<br>c.742C>T           | p.Arg89Trp;<br>p.Arg116Trp<br>;<br>p.Arg209Trp<br>;<br>p.Arg248Trp | 559 | FALSE | chr17:757<br>7539:G:A  | 99:chr17:7<br>577539:G:<br>A  | 0.385237 |
| 51_t2c2-1 | 51 | NTRK1              | MODERATE                   | c.2028C>A<br>;<br>c.2118C>A<br>;<br>c.2136C>A             | p.Ser676Arg<br>;<br>p.Ser706Arg<br>;<br>p.Ser712Arg                | 1   | FALSE | chr1:1568<br>49880:C:A | 99:chr1:15<br>6849880:C<br>:A | 0.000716 |
| 51_t2c2-1 | 51 | FGFR3              | MODIFIER; MODERATE         | c.931-<br>374G>A;<br>c.1196G>A<br>;<br>c.1202G>A          | ; p.Arg399His<br>;<br>p.Arg401His                                  | 1   | FALSE | chr4:1806<br>177:G:A   | 99:chr4:18<br>06177:G:A       | 0.000813 |

|           |    |                    |                    |                                                                                                   |                                                                         |    |       |                        |                               |          |
|-----------|----|--------------------|--------------------|---------------------------------------------------------------------------------------------------|-------------------------------------------------------------------------|----|-------|------------------------|-------------------------------|----------|
| 51_t2c2-1 | 51 | NTRK3              | HIGH               | c.1768G>T;<br>;<br>c.1792G>T                                                                      | p.Glu590*;<br>p.Glu598*                                                 | 0  | FALSE | chr15:884<br>76340:C:A | 99:chr15:8<br>8476340:C<br>:A | 0.001029 |
| 51_t2c2-1 | 51 | ERBB2              | MODERATE; MODIFIER | c.841T>A;<br>c.886T>A;<br>c.931T>A;<br>n.1255T>A                                                  | p.Cys281Ser<br>;<br>p.Cys296Ser<br>;<br>p.Cys311Ser<br>;                | 1  | FALSE | chr17:378<br>68210:T:A | 99:chr17:3<br>7868210:T<br>:A | 0.000481 |
| 51_t2c2-1 | 51 | MIR4673;<br>NOTCH1 | MODIFIER; MODERATE | n.*59G>T;<br>;<br>c.1343G>T                                                                       | p.Arg448Leu                                                             | 0  | FALSE | chr9:1394<br>12302:C:A | 99:chr9:13<br>9412302:C<br>:A | 0.001473 |
| 51_t2c2-1 | 51 | C9orf53;<br>CDKN2A | MODIFIER; MODERATE | n.*616G>A<br>;<br>c.*218C>T;<br>;<br>c.295C>T;<br>;<br>c.338C>T                                   | p.Arg99Trp;<br>p.Pro113Leu                                              | 2  | FALSE | chr9:2197<br>1063:G:A  | 99:chr9:21<br>971063:G:<br>A  | 0.000819 |
| 51_t2c2-1 | 51 | RET                | MODERATE           | c.1892A>G                                                                                         | p.Asp631Gly                                                             | 3  | FALSE | chr10:436<br>09940:A:G | 99:chr10:4<br>3609940:A<br>:G | 0.000424 |
| 51_t2c2-1 | 51 | C9orf53;<br>CDKN2A | MODIFIER; MODERATE | n.*616G>T<br>;<br>c.*263C>A<br>;<br>;<br>c.340C>A;<br>;<br>c.383C>A                               | p.Pro114Thr<br>;<br>p.Ala128Asp                                         | 2  | TRUE  | chr9:2197<br>1018:G:T  | 99:chr9:21<br>971018:G:<br>T  | 0.000564 |
| 51_t2c2-1 | 51 | TP53               | MODERATE           | c.370C>T;<br>c.451C>T;<br>c.730C>T;<br>c.847C>T                                                   | p.Arg124Cys<br>;<br>p.Arg151Cys<br>;<br>p.Arg244Cys<br>;<br>p.Arg283Cys | 19 | FALSE | chr17:757<br>7091:G:A  | 99:chr17:7<br>577091:G:<br>A  | 0.000682 |
| 51_t2c2-1 | 51 | C9orf53;<br>CDKN2A | MODIFIER; MODERATE | n.*616G>A<br>;<br>c.*318C>T;<br>;<br>c.*39C>T;<br>;<br>c.395C>T                                   | p.Ala132Val                                                             | 1  | FALSE | chr9:2197<br>0963:G:A  | 99:chr9:21<br>970963:G:<br>A  | 0.00057  |
| 51_t2c2-1 | 51 | GAPDH;<br>IFFO1    | MODERATE; MODIFIER | c.217G>A;<br>c.343G>A;<br>c.*1743C><br>T;<br>c.*1746C><br>T;<br>c.*1770C><br>T;<br>n.*2798C><br>T | p.Gly73Arg;<br>p.Gly115Arg                                              | 0  | FALSE | chr12:664<br>6282:G:A  | 99:chr12:6<br>646282:G:<br>A  | 0.00052  |

|           |    |                             |                    |                                                                                                                      |                                                                                    |    |       |                        |                               |          |
|-----------|----|-----------------------------|--------------------|----------------------------------------------------------------------------------------------------------------------|------------------------------------------------------------------------------------|----|-------|------------------------|-------------------------------|----------|
| 51_t2c2-1 | 51 | ESR1                        | HIGH               | c.1426C>T;<br>c.1429C>T;<br>c.1435C>T                                                                                | p.Arg476*;<br>p.Arg477*;<br>p.Arg479*                                              | 0  | FALSE | chr6:1524<br>15579:C:T | 99:chr6:15<br>2415579:C<br>:T | 0.000965 |
| 51_t2c2-1 | 51 | NOTCH1                      | HIGH               | c.6022G>T                                                                                                            | p.Glu2008*                                                                         | 0  | FALSE | chr9:1393<br>93624:C:A | 99:chr9:13<br>9393624:C<br>:A | 0.000546 |
| 51_t2c2-1 | 51 | ALK                         | MODERATE           | c.4192C>T                                                                                                            | p.Pro1398Ser                                                                       | 1  | FALSE | chr2:2941<br>6761:G:A  | 99:chr2:29<br>416761:G:<br>A  | 0.001806 |
| 51_t2c2-1 | 51 | IDH1                        | MODERATE           | c.974C>T                                                                                                             | p.Thr325Met                                                                        | 2  | FALSE | chr2:2091<br>04604:G:A | 99:chr2:20<br>9104604:G<br>:A | 0.000671 |
| 51_t2c2-1 | 51 | NOTCH1                      | MODERATE           | c.5347C>T                                                                                                            | p.Arg1783Trp                                                                       | 0  | FALSE | chr9:1393<br>96761:G:A | 99:chr9:13<br>9396761:G<br>:A | 0.000655 |
| 51_t2c2-1 | 51 | ALK                         | MODERATE           | c.2258G>T                                                                                                            | p.Arg753Leu                                                                        | 1  | FALSE | chr2:2946<br>2643:C:A  | 99:chr2:29<br>462643:C:<br>A  | 0.000536 |
| 51_t2c2-1 | 51 | TP53                        | MODERATE           | c.364G>T;<br>c.445G>T;<br>c.724G>T;<br>c.841G>T                                                                      | p.Asp122Tyr<br>;<br>p.Asp149Tyr<br>;<br>p.Asp242Tyr<br>;<br>p.Asp281Tyr            | 28 | FALSE | chr17:757<br>7097:C:A  | 99:chr17:7<br>577097:C:<br>A  | 0.00069  |
| 51_t2c2-1 | 51 | NOTCH1                      | HIGH               | c.3250G>T                                                                                                            | p.Glu1084*                                                                         | 0  | FALSE | chr9:1394<br>02759:C:A | 99:chr9:13<br>9402759:C<br>:A | 0.000888 |
| 51_t2c2-1 | 51 | HGF                         | MODERATE           | c.5G>T                                                                                                               | p.Trp2Leu                                                                          | 0  | FALSE | chr7:8139<br>9283:C:A  | 99:chr7:81<br>399283:C:<br>A  | 0.001828 |
| 51_t2c2-1 | 51 | SMO                         | HIGH               | c.1191C>A                                                                                                            | p.Tyr397*                                                                          | 0  | FALSE | chr7:1288<br>46355:C:A | 99:chr7:12<br>8846355:C<br>:A | 0.000672 |
| 51_t2c2-1 | 51 | MITF                        | MODERATE           | c.250C>T;<br>c.358C>T;<br>c.403C>T;<br>c.406C>T;<br>c.85C>T                                                          | p.Arg84Trp;<br>p.Arg120Trp<br>;<br>p.Arg135Trp<br>;<br>p.Arg136Trp<br>; p.Arg29Trp | 0  | FALSE | chr3:6998<br>7024:C:T  | 99:chr3:69<br>987024:C:<br>T  | 0.00061  |
| 51_t2c2-1 | 51 | ERBB2;<br>MIEN1;<br>MIR4728 | MODIFIER; MODERATE | c.3160-<br>213A>G;<br>c.3251A>G<br>;<br>c.3296A>G<br>;<br>c.3341A>G<br>;<br>n.3665A>G<br>;<br>c.*388T>C;<br>n.*67A>G | p.Glu1084Gly;<br>p.Glu1099Gly;<br>p.Glu1114Gly                                     | 1  | FALSE | chr17:378<br>83729:A:G | 99:chr17:3<br>7883729:A<br>:G | 0.00093  |

|           |     |                   |                    |                                                  |                                       |     |       |                        |                                |          |
|-----------|-----|-------------------|--------------------|--------------------------------------------------|---------------------------------------|-----|-------|------------------------|--------------------------------|----------|
| 51_t2c2-1 | 51  | NTRK2             | MODERATE           | c.1023G>A<br>;<br>c.1062G>A                      | p.Met341Ile<br>;<br>p.Met354Ile       | 0   | FALSE | chr9:8734<br>2777:G:A  | 99:chr9:87<br>342777:G:<br>A   | 0.001359 |
| 51_t2c2-1 | 51  | FGFR3             | MODIFIER; MODERATE | c.931-<br>398C>A;<br>c.1172C>A<br>;<br>c.1178C>A | p.Ala391Glu<br>;<br>p.Ala393Glu       | 34  | FALSE | chr4:1806<br>153:C:A   | 99:chr4:18<br>06153:C:A        | 0.001756 |
| 51_t2c2-1 | 51  | CDH1              | MODERATE           | c.1204G>A                                        | p.Asp402As<br>n                       | 0   | FALSE | chr16:688<br>47282:G:A | 99:chr16:6<br>8847282:G<br>:A  | 0.00066  |
| 51_t2c2-1 | 51  | RET               | MODERATE           | c.1349G>A                                        | p.Ser450Asn                           | 1   | FALSE | chr10:436<br>06740:G:A | 99:chr10:4<br>3606740:G<br>:A  | 0.000455 |
| 51_t2c2-1 | 51  | NF1               | MODERATE           | c.5458C>A<br>;<br>c.5521C>A                      | p.Gln1820Ly<br>s;<br>p.Gln1841Ly<br>s | 3   | FALSE | chr17:296<br>54769:C:A | 99:chr17:2<br>9654769:C<br>:A  | 0.000533 |
| 51_t2c2-1 | 51  | RET               | MODERATE           | c.1991C>A                                        | p.Ala664Asp                           | 2   | FALSE | chr10:436<br>10039:C:A | 99:chr10:4<br>3610039:C<br>:A  | 0.000799 |
| 51_t2c2-1 | 51  | TSC2              | MODERATE           | c.1381G>A                                        | p.Val461Met                           | 0   | FALSE | chr16:211<br>2992:G:A  | 99:chr16:2<br>112992:G:<br>A   | 0.000543 |
| 51_t2c2-1 | 51  | EGFR;<br>EGFR-AS1 | MODERATE; MODIFIER | c.2576C>A<br>; n.-1G>T                           | p.Ala859Asp<br>;                      | 1   | FALSE | chr7:5525<br>9518:C:A  | 99:chr7:55<br>259518:C:<br>A   | 0.000806 |
| 51_t2c2-1 | 51  | INSRR;<br>NTRK1   | MODERATE; LOW      | c.3356G>T<br>; c.82C>A                           | p.Arg1119Le<br>u;<br>p.Arg28Arg       | 1   | FALSE | chr1:1568<br>11945:C:A | 99:chr1:15<br>6811945:C<br>:A  | 0.000797 |
| 100_bl-1  | 100 | KRAS              | MODERATE           | c.436G>A                                         | p.Ala146Thr                           | 118 | FALSE | chr12:253<br>78562:C:T | 100:chr12:<br>25378562:<br>C:T | 0.054945 |
| 100_bl-1  | 100 | BRAF              | MODERATE           | c.1780G>A                                        | p.Asp594Asn                           | 20  | FALSE | chr7:1404<br>53155:C:T | 100:chr7:1<br>40453155:<br>C:T | 0.081897 |
| 100_bl-1  | 100 | RET               | MODERATE           | c.1942G>A                                        | p.Val648Ile                           | 2   | FALSE | chr10:436<br>09990:G:A | 100:chr10:<br>43609990:<br>G:A | 0.086066 |
| 100_bl-1  | 100 | EGFR              | MODERATE           | c.1159C>G                                        | p.Leu387Val                           | 1   | FALSE | chr7:5522<br>4477:C:G  | 100:chr7:5<br>5224477:C<br>:G  | 0.011494 |
| 100_bl-1  | 100 | AKT3              | HIGH               | c.196C>T                                         | p.Arg66*                              | 0   | FALSE | chr1:2438<br>28162:G:A | 100:chr1:2<br>43828162:<br>G:A | 0.105932 |

|          |     |        |                    |                                                                                                                           |                                                                                                                                                              |      |       |                            |                                 |          |
|----------|-----|--------|--------------------|---------------------------------------------------------------------------------------------------------------------------|--------------------------------------------------------------------------------------------------------------------------------------------------------------|------|-------|----------------------------|---------------------------------|----------|
| 52_bl-2  | 52  | FGFR2  | MODERATE; MODIFIER | c.1394C>T;<br>c.1397C>T;<br>c.1400C>T;<br>c.1409C>T;<br>c.1478C>T;<br>c.1481C>T;<br>c.1745C>T;<br>c.1748C>T;<br>n.2195C>T | p.Pro465Leu<br>;<br>p.Pro466Leu<br>;<br>p.Pro467Leu<br>;<br>p.Pro470Leu<br>;<br>p.Pro493Leu<br>;<br>p.Pro494Leu<br>;<br>p.Pro582Leu<br>;<br>p.Pro583Leu<br>; | 2    | FALSE | chr10:123<br>256164:G<br>A | 101:chr10:<br>12325616<br>4:G:A | 0.003268 |
| 52_bl-2  | 52  | KRAS   | MODERATE           | c.34G>T                                                                                                                   | p.Gly12Cys                                                                                                                                                   | 3755 | FALSE | chr12:253<br>98285:C:A     | 101:chr12:<br>25398285:<br>C:A  | 0.005263 |
| 52_bl-2  | 52  | CDKN2A | MODIFIER; MODERATE | c.194-<br>3568A>C;<br>c.52A>C                                                                                             | p.Thr18Pro                                                                                                                                                   | 1    | FALSE | chr9:2197<br>4775:T:G      | 101:chr9:2<br>1974775:T<br>:G   | 0.004739 |
| 52_bl-2  | 52  | TSC2   | MODERATE           | c.667G>A                                                                                                                  | p.Asp223As<br>n                                                                                                                                              | 0    | FALSE | chr16:210<br>6663:G:A      | 101:chr16:<br>2106663:G<br>:A   | 0.003361 |
| 52_bl-2  | 52  | TP53   | MODIFIER; MODERATE | c.*144A>G<br>;<br>c.*56A>G;<br>c.1037A>G<br>;<br>c.560A>G;<br>c.641A>G;<br>c.920A>G                                       | p.Glu346Gly<br>;<br>p.Glu187Gly<br>;<br>p.Glu214Gly<br>;<br>p.Glu307Gly                                                                                      | 1    | FALSE | chr17:757<br>3990:T:C      | 101:chr17:<br>7573990:T<br>:C   | 0.003077 |
| 52_bl-2  | 52  | NTRK3  | MODERATE           | c.506G>A                                                                                                                  | p.Arg169His                                                                                                                                                  | 0    | FALSE | chr15:886<br>80751:C:T     | 101:chr15:<br>88680751:<br>C:T  | 0.00313  |
| 52_bl-2  | 52  | GNA11  | MODERATE           | c.440G>A                                                                                                                  | p.Arg147His                                                                                                                                                  | 1    | FALSE | chr19:311<br>3446:G:A      | 101:chr19:<br>3113446:G<br>:A   | 0.002954 |
| 102_bl-1 | 102 | NTRK1  | MODERATE           | c.804C>G;<br>c.894C>G                                                                                                     | p.His268Gln<br>;<br>p.His298Gln                                                                                                                              | 1    | FALSE | chr1:1568<br>43468:C:G     | 102:chr1:1<br>56843468:<br>C:G  | 0.002663 |
| 102_bl-1 | 102 | SMO    | MODERATE           | c.1684C>T                                                                                                                 | p.Arg562Trp                                                                                                                                                  | 0    | FALSE | chr7:1288<br>50837:C:T     | 102:chr7:1<br>28850837:<br>C:T  | 0.000998 |
| 102_bl-1 | 102 | KDR    | MODERATE           | c.1028C>T                                                                                                                 | p.Thr343Me<br>t                                                                                                                                              | 3    | FALSE | chr4:5597<br>6884:G:A      | 102:chr4:5<br>5976884:G<br>:A   | 0.000706 |
| 102_bl-1 | 102 | NTRK3  | MODERATE           | c.1420C>T;<br>c.1444C>T                                                                                                   | p.His474Tyr;<br>p.His482Tyr                                                                                                                                  | 0    | FALSE | chr15:885<br>76229:G:A     | 102:chr15:<br>88576229:<br>G:A  | 0.001498 |

|          |     |                 |                    |                                                                           |                                                                                             |   |       |                    |                        |          |
|----------|-----|-----------------|--------------------|---------------------------------------------------------------------------|---------------------------------------------------------------------------------------------|---|-------|--------------------|------------------------|----------|
| 102_bl-1 | 102 | NTRK3           | MODERATE           | c.2009G>A;<br>c.2033G>A                                                   | p.Arg670Gln;<br>p.Arg678Gln                                                                 | 0 | FALSE | chr15:88472522:C:T | 102:chr15:88472522:C:T | 0.00116  |
| 102_bl-1 | 102 | PIK3CA          | MODERATE           | c.3154A>G                                                                 | p.Thr1052Ala                                                                                | 3 | FALSE | chr3:178952099:A:G | 102:chr3:178952099:A:G | 0.001238 |
| 102_bl-1 | 102 | FGFR1           | MODERATE           | c.487C>T;<br>c.493C>T;<br>c.736C>T;<br>c.754C>T;<br>c.760C>T;<br>c.853C>T | p.Arg163Trp;<br>p.Arg165Trp;<br>p.Arg246Trp;<br>p.Arg252Trp;<br>p.Arg254Trp;<br>p.Arg285Trp | 1 | FALSE | chr8:38282203:G:A  | 102:chr8:38282203:G:A  | 0.001206 |
| 102_bl-1 | 102 | CDH1            | MODERATE           | c.1297G>A                                                                 | p.Asp433Asn                                                                                 | 0 | FALSE | chr16:68847375:G:A | 102:chr16:68847375:G:A | 0.001126 |
| 102_bl-1 | 102 | KDR             | MODERATE           | c.3455C>T                                                                 | p.Thr1152Met                                                                                | 1 | FALSE | chr4:55955090:G:A  | 102:chr4:55955090:G:A  | 0.001027 |
| 102_bl-1 | 102 | MET             | MODERATE           | c.959C>T                                                                  | p.Ala320Val                                                                                 | 1 | FALSE | chr7:116340097:C:T | 102:chr7:116340097:C:T | 0.001149 |
| 102_bl-1 | 102 | ALK             | MODERATE           | c.446C>T                                                                  | p.Ala149Val                                                                                 | 1 | FALSE | chr2:30143080:G:A  | 102:chr2:30143080:G:A  | 0.001826 |
| 102_bl-1 | 102 | ERBB2           | MODERATE; MODIFIER | c.1031C>T;<br>c.1076C>T;<br>c.986C>T;<br>n.1400C>T                        | p.Ala344Val;<br>p.Ala359Val;<br>p.Ala329Val;                                                | 1 | FALSE | chr17:37868629:C:T | 102:chr17:37868629:C:T | 0.001003 |
| 102_bl-1 | 102 | IGF1R           | MODERATE           | c.3934T>C;<br>c.3937T>C                                                   | p.Ser1312Pro;<br>p.Ser1313Pro                                                               | 0 | FALSE | chr15:99500504:T:C | 102:chr15:99500504:T:C | 0.005088 |
| 102_bl-1 | 102 | TP53            | MODERATE           | c.143A>G;<br>c.422A>G;<br>c.539A>G;<br>c.62A>G                            | p.Glu48Gly;<br>p.Glu141Gly;<br>p.Glu180Gly;<br>p.Glu21Gly                                   | 1 | FALSE | chr17:7578391:T:C  | 102:chr17:7578391:T:C  | 0.001817 |
| 102_bl-1 | 102 | INSRR;<br>NTRK1 | MODIFIER; MODERATE | c.3397+13C>T;<br>c.28G>A                                                  | p.Ala10Thr                                                                                  | 1 | FALSE | chr1:156811891:G:A | 102:chr1:156811891:G:A | 0.000857 |

|          |     |                    |                            |                                                                             |                                                                                             |      |       |                        |                                |          |
|----------|-----|--------------------|----------------------------|-----------------------------------------------------------------------------|---------------------------------------------------------------------------------------------|------|-------|------------------------|--------------------------------|----------|
| 102_bl-1 | 102 | FGFR1              | MODERATE                   | c.359C>T;<br>c.365C>T;<br>c.608C>T;<br>c.626C>T;<br>c.632C>T;<br>c.725C>T   | p.Ala120Val;<br>p.Ala122Val;<br>p.Ala203Val;<br>p.Ala209Val;<br>p.Ala211Val;<br>p.Ala242Val | 1    | FALSE | chr8:3828<br>3753:G:A  | 102:chr8:3<br>8283753:G<br>:A  | 0.001334 |
| 102_bl-1 | 102 | FBXW7              | MODERATE                   | c.1159C>T;<br>c.1273C>T;<br>c.1513C>T                                       | p.Arg387Cys<br>;<br>p.Arg425Cys<br>;<br>p.Arg505Cys                                         | 0    | FALSE | chr4:1532<br>47289:G:A | 102:chr4:1<br>53247289:<br>G:A | 0.001085 |
| 102_bl-1 | 102 | MET                | MODERATE                   | c.1406G>A                                                                   | p.Arg469Gln                                                                                 | 2    | FALSE | chr7:1163<br>80017:G:A | 102:chr7:1<br>16380017:<br>G:A | 0.001865 |
| 102_bl-1 | 102 | TP53               | MODIFIER; HIGH             | c.*158A>T;<br>c.*70A>T;<br>c.1051A>T;<br>c.574A>T;<br>c.655A>T;<br>c.934A>T | p.Lys351*;<br>p.Lys192*;<br>p.Lys219*;<br>p.Lys312*                                         | 2    | FALSE | chr17:757<br>3976:T:A  | 102:chr17:<br>7573976:T<br>:A  | 0.001112 |
| 102_bl-1 | 102 | KRAS               | MODERATE                   | c.34G>T                                                                     | p.Gly12Cys                                                                                  | 3755 | FALSE | chr12:253<br>98285:C:A | 102:chr12:<br>25398285:<br>C:A | 0.30802  |
| 102_bl-1 | 102 | KDR                | MODERATE                   | c.2003C>T                                                                   | p.Thr668Met                                                                                 | 1    | FALSE | chr4:5596<br>8660:G:A  | 102:chr4:5<br>5968660:G<br>:A  | 0.001529 |
| 102_bl-1 | 102 | IGF1R              | MODERATE                   | c.3005G>A<br>;<br>c.3008G>A                                                 | p.Arg1002Gln;<br>p.Arg1003Gln                                                               | 0    | FALSE | chr15:994<br>78104:G:A | 102:chr15:<br>99478104:<br>G:A | 0.001153 |
| 102_bl-1 | 102 | CTNNB1             | MODERATE                   | c.497T>G                                                                    | p.Val166Gly                                                                                 | 0    | FALSE | chr3:4126<br>6826:T:G  | 102:chr3:4<br>1266826:T<br>:G  | 0.001637 |
| 102_bl-1 | 102 | NOTCH1             | MODERATE                   | c.5987C>T                                                                   | p.Thr1996Met                                                                                | 0    | FALSE | chr9:1393<br>93659:G:A | 102:chr9:1<br>39393659:<br>G:A | 0.001204 |
| 102_bl-1 | 102 | EGFR;<br>EGFR-AS1  | MODERATE; MODIFIER         | c.2393T>C;<br>n.1169A>G                                                     | p.Leu798Pro<br>;                                                                            | 3    | FALSE | chr7:5524<br>9095:T:C  | 102:chr7:5<br>5249095:T<br>:C  | 0.00168  |
| 102_bl-1 | 102 | C9orf53;<br>CDKN2A | MODIFIER; MODERATE;<br>LOW | n.*616T>G<br>;<br>c.*120A>C<br>;<br>c.197A>C;<br>c.240A>C                   | p.His66Pro;<br>p.Pro80Pro                                                                   | 1    | FALSE | chr9:2197<br>1161:T:G  | 102:chr9:2<br>1971161:T<br>:G  | 0.034707 |



|          |     |      |                    |                                                                               |                                                                         |   |       |                    |                        |          |
|----------|-----|------|--------------------|-------------------------------------------------------------------------------|-------------------------------------------------------------------------|---|-------|--------------------|------------------------|----------|
| 102_bl-1 | 102 | EGFR | MODIFIER; MODERATE | c.*2364C>T;<br>c.2165C>T                                                      | p.Ala722Val                                                             | 2 | FALSE | chr7:55241717:C:T  | 102:chr7:55241717:C:T  | 0.001215 |
| 102_bl-1 | 102 | TP53 | MODIFIER; MODERATE | c.*137A>G;<br>c.*225A>G;<br>c.1001A>G;<br>c.1118A>G;<br>c.641A>G;<br>c.722A>G | p.Lys334Arg<br>p.Lys373Arg<br>p.Lys214Arg<br>p.Lys241Arg                | 1 | FALSE | chr17:7572991:T:C  | 102:chr17:7572991:T:C  | 0.003546 |
| 102_bl-1 | 102 | DDR2 | MODERATE           | c.2002C>T                                                                     | p.Arg668Cys                                                             | 2 | FALSE | chr1:162745587:C:T | 102:chr1:162745587:C:T | 0.000854 |
| 102_bl-1 | 102 | MITF | MODIFIER; MODERATE | c.93+115G>A;<br>c.208G>A;<br>c.373G>A;<br>c.481G>A;<br>c.526G>A;<br>c.529G>A  | p.Ala70Thr;<br>p.Ala125Thr<br>p.Ala161Thr<br>p.Ala176Thr<br>p.Ala177Thr | 0 | FALSE | chr3:69987147:G:A  | 102:chr3:69987147:G:A  | 0.00154  |
| 102_bl-1 | 102 | ROS1 | HIGH               | c.5728C>T                                                                     | p.Arg1910*                                                              | 1 | FALSE | chr6:117642471:G:A | 102:chr6:117642471:G:A | 0.001426 |
| 102_bl-1 | 102 | TP53 | MODERATE           | c.242G>T;<br>c.323G>T;<br>c.602G>T;<br>c.719G>T                               | p.Ser81Ile;<br>p.Ser108Ile;<br>p.Ser201Ile;<br>p.Ser240Ile              | 6 | FALSE | chr17:757562:C:A   | 102:chr17:757562:C:A   | 0.001646 |
| 102_bl-1 | 102 | CDH1 | MODERATE           | c.1423G>A                                                                     | p.Val475Met                                                             | 0 | FALSE | chr16:68849520:G:A | 102:chr16:68849520:G:A | 0.001189 |
| 102_bl-1 | 102 | MET  | MODERATE           | c.487T>C                                                                      | p.Ser163Pro                                                             | 1 | FALSE | chr7:116339625:T:C | 102:chr7:116339625:T:C | 0.002125 |

|          |     |                 |                    |                                                                                                                                                                                                        |                                                                                                                      |       |       |                             |                                 |          |
|----------|-----|-----------------|--------------------|--------------------------------------------------------------------------------------------------------------------------------------------------------------------------------------------------------|----------------------------------------------------------------------------------------------------------------------|-------|-------|-----------------------------|---------------------------------|----------|
| 102_bl-1 | 102 | FGFR1;<br>LETM2 | LOW; MODIFIER      | c.2022G>A<br>;<br>c.2028G>A<br>;<br>c.2265G>A<br>;<br>c.2289G>A<br>;<br>c.2295G>A<br>;<br>c.2388G>A<br>;<br>c.*1406C><br>T;<br>c.*1423C><br>T;<br>c.*1553C><br>T;<br>c.*1567C><br>T;<br>c.*1638C><br>T | p.Glu674Glu<br>;<br>p.Glu676Glu<br>;<br>p.Glu755Glu<br>;<br>p.Glu763Glu<br>;<br>p.Glu765Glu<br>;<br>p.Glu796Glu<br>; | 1     | FALSE | chr8:3827<br>1320:C:T       | 102:chr8:3<br>8271320:C<br>:T   | 0.001813 |
| 102_bl-1 | 102 | PDGFRA          | MODERATE           | c.827C>T                                                                                                                                                                                               | p.Thr276Met                                                                                                          | 1     | FALSE | chr4:5513<br>3523:C:T       | 102:chr4:5<br>5133523:C<br>:T   | 0.001314 |
| 102_bl-1 | 102 | DDR2            | MODERATE           | c.700G>A                                                                                                                                                                                               | p.Asp234Asn                                                                                                          | 1     | FALSE | chr1:1627<br>29614:G:A      | 102:chr1:1<br>62729614:<br>G:A  | 0.000988 |
| 102_bl-1 | 102 | AKT1            | MODERATE           | c.286C>T                                                                                                                                                                                               | p.Arg96Trp                                                                                                           | 1     | FALSE | chr14:105<br>242997:G:<br>A | 102:chr14:<br>10524299<br>7:G:A | 0.001377 |
| 102_bl-1 | 102 | KIT             | HIGH               | c.2476C>T;<br>c.2488C>T                                                                                                                                                                                | p.Arg826*;<br>p.Arg830*                                                                                              | 2     | FALSE | chr4:5560<br>2667:C:T       | 102:chr4:5<br>5602667:C<br>:T   | 0.001186 |
| 42_bl-2  | 42  | KIT             | MODERATE           | c.1632A>T;<br>c.1644A>T                                                                                                                                                                                | p.Leu544Phe;<br>p.Leu548Phe                                                                                          | 1     | FALSE | chr4:5559<br>3487:A:T       | 103:chr4:5<br>5593487:A<br>:T   | 0.004219 |
| 42_bl-2  | 42  | NTRK3           | MODERATE           | c.2138G>A<br>;<br>c.2162G>A<br>;<br>c.2204G>A                                                                                                                                                          | p.Arg713His<br>;<br>p.Arg721His<br>;<br>p.Arg735His                                                                  | 0     | FALSE | chr15:884<br>23631:C:T      | 103:chr15:<br>88423631:<br>C:T  | 0.003759 |
| 42_bl-2  | 42  | FBXW7           | MODERATE           | c.232A>T;<br>c.346A>T;<br>c.586A>T                                                                                                                                                                     | p.Thr78Ser;<br>p.Thr116Ser<br>;<br>p.Thr196Ser                                                                       | 0     | FALSE | chr4:1532<br>68222:T:A      | 103:chr4:1<br>53268222:<br>T:A  | 0.001794 |
| 42_bl-2  | 42  | CDKN2A          | MODIFIER; MODERATE | c.194-<br>3568A>C;<br>c.52A>C                                                                                                                                                                          | ; p.Thr18Pro                                                                                                         | 1     | FALSE | chr9:2197<br>4775:T:G       | 103:chr9:2<br>1974775:T<br>:G   | 0.00545  |
| 42_bl-2  | 42  | KRAS            | MODERATE           | c.35G>A                                                                                                                                                                                                | p.Gly12Asp                                                                                                           | 11213 | FALSE | chr12:253<br>98284:C:T      | 103:chr12:<br>25398284:<br>C:T  | 0.113276 |
| 42_bl-2  | 42  | TSC2            | MODERATE           | c.781C>T                                                                                                                                                                                               | p.Arg261Trp                                                                                                          | 0     | FALSE | chr16:210<br>7112:C:T       | 103:chr16:<br>2107112:C<br>:T   | 0.002899 |

|          |     |                    |                    |                                                                             |                                                               |       |       |                        |                                |          |
|----------|-----|--------------------|--------------------|-----------------------------------------------------------------------------|---------------------------------------------------------------|-------|-------|------------------------|--------------------------------|----------|
| 42_bl-2  | 42  | TP53               | MODIFIER; HIGH     | c.*158A>T;<br>c.*70A>T;<br>c.1051A>T;<br>c.574A>T;<br>c.655A>T;<br>c.934A>T | ; p.Lys351*;<br>p.Lys192*;<br>p.Lys219*;<br>p.Lys312*         | 2     | FALSE | chr17:757<br>3976:T:A  | 103:chr17:<br>7573976:T<br>:A  | 0.075334 |
| 42_bl-2  | 42  | ROS1               | MODERATE           | c.5651G>A                                                                   | p.Arg1884Lys                                                  | 1     | FALSE | chr6:1176<br>42548:C:T | 103:chr6:1<br>17642548:<br>C:T | 0.002967 |
| 42_bl-2  | 42  | MITF               | MODERATE           | c.157A>C;<br>c.265A>C;<br>c.310A>C;<br>c.313A>C                             | p.Thr53Pro;<br>p.Thr89Pro;<br>p.Thr104Pro<br>;<br>p.Thr105Pro | 0     | FALSE | chr3:6992<br>8493:A:C  | 103:chr3:6<br>9928493:A<br>:C  | 0.002045 |
| 42_bl-2  | 42  | TP53               | MODIFIER; HIGH     | c.-41G>A;<br>c.320G>A;<br>c.41G>A;<br>c.437G>A                              | ; p.Trp107*;<br>p.Trp14*;<br>p.Trp146*                        | 47    | FALSE | chr17:757<br>8493:C:T  | 103:chr17:<br>7578493:C<br>:T  | 0.025271 |
| 42_bl-2  | 42  | NF1                | MODERATE           | c.5426G>A<br>;<br>c.5489G>A                                                 | p.Arg1809His<br>;<br>p.Arg1830His                             | 1     | FALSE | chr17:296<br>54737:G:A | 103:chr17:<br>29654737:<br>G:A | 0.002237 |
| 42_bl-2  | 42  | RET                | MODERATE           | c.1852T>C                                                                   | p.Cys618Arg                                                   | 2     | FALSE | chr10:436<br>09096:T:C | 103:chr10:<br>43609096:<br>T:C | 0.00344  |
| 106_c2-1 | 106 | KRAS               | MODERATE           | c.35G>A                                                                     | p.Gly12Asp                                                    | 11213 | FALSE | chr12:253<br>98284:C:T | 109:chr12:<br>25398284:<br>C:T | 0.004728 |
| 106_c2-1 | 106 | NTRK1              | MODERATE           | c.1738G>A<br>;<br>c.1828G>A<br>;<br>c.1846G>A                               | p.Asp580Asn<br>;<br>p.Asp610Asn<br>;<br>p.Asp616Asn           | 1     | FALSE | chr1:1568<br>48954:G:A | 109:chr1:1<br>56848954:<br>G:A | 0.006006 |
| 106_c2-1 | 106 | PDGFRA             | MODERATE           | c.1288G>A                                                                   | p.Gly430Arg                                                   | 2     | FALSE | chr4:5513<br>8611:G:A  | 109:chr4:5<br>5138611:G<br>:A  | 0.004938 |
| 106_c2-1 | 106 | FLT3               | MODERATE           | c.2440G>A                                                                   | p.Ala814Thr                                                   | 0     | FALSE | chr13:285<br>92705:C:T | 109:chr13:<br>28592705:<br>C:T | 0.006135 |
| 106_c2-1 | 106 | C9orf53;<br>CDKN2A | MODIFIER; MODERATE | n.*616C>G<br>;<br>c.*140G>C<br>;<br>c.217G>C;<br>c.260G>C                   | ; p.Ala73Pro;<br>p.Arg87Pro                                   | 1     | FALSE | chr9:2197<br>1141:C:G  | 109:chr9:2<br>1971141:C<br>:G  | 0.029762 |

|          |     |                    |                            |                                                             |                                             |   |       |                    |                        |          |
|----------|-----|--------------------|----------------------------|-------------------------------------------------------------|---------------------------------------------|---|-------|--------------------|------------------------|----------|
| 106_c2-1 | 106 | IGF1R              | MODERATE                   | c.3526C>T;<br>c.3529C>T                                     | p.Arg1176Cys;<br>p.Arg1177Cys               | 0 | FALSE | chr15:99486223:C:T | 109:chr15:99486223:C:T | 0.00551  |
| 106_c2-1 | 106 | PDGFRA             | MODERATE                   | c.2914A>G                                                   | p.Ser972Gly                                 | 1 | FALSE | chr4:55156513:A:G  | 109:chr4:55156513:A:G  | 0.004608 |
| 106_c2-1 | 106 | C9orf53;<br>CDKN2A | MODIFIER; MODERATE;<br>LOW | n.*616C>T;<br>;<br>c.*258G>A;<br>;<br>c.335G>A;<br>c.378G>A | p.Arg112His;<br>;<br>p.Pro126Pro            | 1 | FALSE | chr9:21971023:C:T  | 109:chr9:21971023:C:T  | 0.007143 |
| 106_c2-1 | 106 | KDR                | MODERATE                   | c.2323G>T                                                   | p.Ala775Ser                                 | 1 | FALSE | chr4:55964914:C:A  | 109:chr4:55964914:C:A  | 0.004556 |
| 106_c2-1 | 106 | ALK                | MODERATE                   | c.1588G>A                                                   | p.Glu530Lys                                 | 1 | FALSE | chr2:29541229:C:T  | 109:chr2:29541229:C:T  | 0.005682 |
| 49_c12-1 | 49  | KIT                | MODERATE                   | c.2197G>A;<br>;<br>c.2209G>A                                | p.Asp733Asn;<br>;<br>p.Asp737Asn            | 2 | FALSE | chr4:55597561:G:A  | 110:chr4:55597561:G:A  | 0.001705 |
| 49_c12-1 | 49  | NTRK3              | HIGH                       | c.1348C>T;<br>c.1372C>T                                     | p.Arg450*;<br>p.Arg458*                     | 0 | FALSE | chr15:88669526:G:A | 110:chr15:88669526:G:A | 0.001823 |
| 49_c12-1 | 49  | RET                | MODERATE                   | c.1690A>C                                                   | p.Thr564Pro                                 | 1 | FALSE | chr10:43608342:A:C | 110:chr10:43608342:A:C | 0.007524 |
| 49_c12-1 | 49  | CDH1               | MODERATE                   | c.2074G>A                                                   | p.Ala692Thr                                 | 0 | FALSE | chr16:68857439:G:A | 110:chr16:68857439:G:A | 0.001166 |
| 49_c12-1 | 49  | CDH1               | MODERATE                   | c.871G>A                                                    | p.Asp291Asn                                 | 0 | FALSE | chr16:68845625:G:A | 110:chr16:68845625:G:A | 0.001267 |
| 49_c12-1 | 49  | SMO                | MODERATE                   | c.1045A>C                                                   | p.Thr349Pro                                 | 0 | FALSE | chr7:128846115:A:C | 110:chr7:128846115:A:C | 0.009294 |
| 49_c12-1 | 49  | CTNNB1             | MODERATE                   | c.164A>G                                                    | p.Glu55Gly                                  | 0 | FALSE | chr3:41266167:A:G  | 110:chr3:41266167:A:G  | 0.00121  |
| 49_c12-1 | 49  | MET                | MODERATE                   | c.487T>C                                                    | p.Ser163Pro                                 | 1 | FALSE | chr7:116339625:T:C | 110:chr7:116339625:T:C | 0.002268 |
| 49_c12-1 | 49  | NTRK1              | MODERATE                   | c.1940T>G;<br>;<br>c.2030T>G;<br>;<br>c.2048T>G             | p.Val647Gly;<br>p.Val677Gly;<br>p.Val683Gly | 2 | FALSE | chr1:156849792:T:G | 110:chr1:156849792:T:G | 0.006403 |
| 49_c12-1 | 49  | HRAS;<br>LRRC56    | MODERATE; MODIFIER         | c.368G>A;<br>c.-506C>T                                      | p.Arg123His;<br>;                           | 2 | FALSE | chr11:533535:C:T   | 110:chr11:533535:C:T   | 0.001383 |

|          |    |                    |                            |                                                                           |                                                                                                                 |     |       |                        |                                |          |
|----------|----|--------------------|----------------------------|---------------------------------------------------------------------------|-----------------------------------------------------------------------------------------------------------------|-----|-------|------------------------|--------------------------------|----------|
| 49_c12-1 | 49 | FGFR1              | MODERATE                   | c.475C>T;<br>c.481C>T;<br>c.724C>T;<br>c.742C>T;<br>c.748C>T;<br>c.841C>T | p.Arg159Trp<br>;<br>p.Arg161Trp<br>;<br>p.Arg242Trp<br>;<br>p.Arg248Trp<br>;<br>p.Arg250Trp<br>;<br>p.Arg281Trp | 2   | FALSE | chr8:3828<br>2215:G:A  | 110:chr8:3<br>8282215:G<br>:A  | 0.001245 |
| 49_c12-1 | 49 | NOTCH1             | MODERATE                   | c.5819G>A                                                                 | p.Arg1940His                                                                                                    | 0   | FALSE | chr9:1393<br>95119:C:T | 110:chr9:1<br>39395119:<br>C:T | 0.001623 |
| 49_c12-1 | 49 | KDR                | MODERATE                   | c.3091G>A                                                                 | p.Ala1031Thr                                                                                                    | 1   | FALSE | chr4:5595<br>6224:C:T  | 110:chr4:5<br>5956224:C<br>:T  | 0.001292 |
| 49_c12-1 | 49 | EGFR               | HIGH                       | c.3202C>T                                                                 | p.Arg1068*                                                                                                      | 1   | FALSE | chr7:5527<br>0249:C:T  | 110:chr7:5<br>5270249:C<br>:T  | 0.001183 |
| 49_c12-1 | 49 | DDR2               | MODERATE                   | c.1022G>A                                                                 | p.Arg341Gln                                                                                                     | 1   | FALSE | chr1:1627<br>31167:G:A | 110:chr1:1<br>62731167:<br>G:A | 0.001505 |
| 49_c12-1 | 49 | FBXW7              | HIGH                       | c.1480C>T;<br>c.1594C>T;<br>c.1834C>T                                     | p.Gln494*;<br>p.Gln532*;<br>p.Gln612*                                                                           | 0   | FALSE | chr4:1532<br>45357:G:A | 110:chr4:1<br>53245357:<br>G:A | 0.001958 |
| 49_c12-1 | 49 | C9orf53;<br>CDKN2A | MODIFIER; MODERATE;<br>LOW | n.*616T>G<br>;<br>c.*120A>C<br>;<br>c.197A>C;<br>c.240A>C                 | p.His66Pro;<br>p.Pro80Pro                                                                                       | 1   | FALSE | chr9:2197<br>1161:T:G  | 110:chr9:2<br>1971161:T<br>:G  | 0.023102 |
| 49_c12-1 | 49 | NOTCH1             | MODERATE                   | c.4252G>A                                                                 | p.Ala1418Thr                                                                                                    | 0   | FALSE | chr9:1394<br>00096:C:T | 110:chr9:1<br>39400096:<br>C:T | 0.001556 |
| 49_c12-1 | 49 | PIK3R1             | MODERATE                   | c.1145C>T;<br>c.1235C>T;<br>c.2045C>T;<br>c.956C>T                        | p.Ala382Val;<br>p.Ala412Val;<br>p.Ala682Val;<br>p.Ala319Val                                                     | 2   | FALSE | chr5:6759<br>3299:C:T  | 110:chr5:6<br>7593299:C<br>:T  | 0.001119 |
| 49_c12-1 | 49 | PIK3CA             | MODERATE                   | c.1634A>C                                                                 | p.Glu545Ala                                                                                                     | 132 | FALSE | chr3:1789<br>36092:A:C | 110:chr3:1<br>78936092:<br>A:C | 0.001235 |
| 49_c12-1 | 49 | NF1                | MODERATE                   | c.5624C>T;<br>c.5687C>T                                                   | p.Ser1875Leu;<br>p.Ser1896Leu                                                                                   | 1   | FALSE | chr17:296<br>57391:C:T | 110:chr17:<br>29657391:<br>C:T | 0.001328 |

|          |    |                             |                    |                                                                                                                  |                                                |       |       |                     |                         |          |
|----------|----|-----------------------------|--------------------|------------------------------------------------------------------------------------------------------------------|------------------------------------------------|-------|-------|---------------------|-------------------------|----------|
| 49_c12-1 | 49 | ERBB2;<br>MIEN1;<br>MIR4728 | MODIFIER; MODERATE | c.3160-213A>G;<br>c.3251A>G<br>;<br>c.3296A>G<br>;<br>c.3341A>G<br>;<br>n.3665A>G<br>;<br>c.*388T>C;<br>n.*67A>G | p.Glu1084Gly;<br>p.Glu1099Gly;<br>p.Glu1114Gly | 1     | FALSE | chr17:37883729:A:G  | 110:chr17:37883729:A:G  | 0.001974 |
| 49_c12-1 | 49 | KIT                         | MODERATE           | c.1486G>A                                                                                                        | p.Asp496Asn                                    | 1     | FALSE | chr4:55592162:G:A   | 110:chr4:55592162:G:A   | 0.001344 |
| 49_c12-1 | 49 | CDH1                        | MODERATE           | c.937G>A                                                                                                         | p.Asp313Asn                                    | 0     | FALSE | chr16:68845691:G:A  | 110:chr16:68845691:G:A  | 0.001245 |
| 49_c12-1 | 49 | EGFR;<br>EGFR-AS1           | MODERATE; MODIFIER | c.2305G>A;<br>n.1257C>T                                                                                          | p.Val769Met                                    | 3     | FALSE | chr7:55249007:G:A   | 110:chr7:55249007:G:A   | 0.001074 |
| 49_c12-1 | 49 | CTNNB1                      | MODERATE           | c.1345C>T                                                                                                        | p.Arg449Cys                                    | 0     | FALSE | chr3:41275179:C:T   | 110:chr3:41275179:C:T   | 0.001131 |
| 49_c12-1 | 49 | ERBB2;<br>MIEN1;<br>MIR4728 | MODERATE; MODIFIER | c.3025G>A<br>;<br>c.3070G>A<br>;<br>c.3115G>A<br>;<br>n.3439G>A<br>;<br>c.*388C>T;<br>n.*67G>A                   | p.Ala1009Thr;<br>p.Ala1024Thr;<br>p.Ala1039Thr | 2     | FALSE | chr17:37883212:G:A  | 110:chr17:37883212:G:A  | 0.001403 |
| 49_c12-1 | 49 | IGF1R                       | MODERATE           | c.3934T>C;<br>c.3937T>C                                                                                          | p.Ser1312Pro;<br>p.Ser1313Pro                  | 0     | FALSE | chr15:99500504:T:C  | 110:chr15:99500504:T:C  | 0.004624 |
| 49_c12-1 | 49 | ATM                         | MODERATE           | c.7949A>C                                                                                                        | p.Asp2650Ala                                   | 0     | FALSE | chr11:108204634:A:C | 110:chr11:108204634:A:C | 0.00127  |
| 49_c12-1 | 49 | NRAS                        | MODERATE           | c.394G>A                                                                                                         | p.Glu132Lys                                    | 2     | FALSE | chr1:115252246:C:T  | 110:chr1:115252246:C:T  | 0.001157 |
| 49_c12-1 | 49 | NTHL1;<br>TSC2              | MODIFIER; MODERATE | c.-20C>T;<br>c.170G>A                                                                                            | p.Arg57His                                     | 0     | FALSE | chr16:2100432:G:A   | 110:chr16:2100432:G:A   | 0.001316 |
| 49_c12-1 | 49 | CDKN2A                      | MODIFIER; MODERATE | c.194-3567C>T;<br>c.53C>T                                                                                        | p.Thr18Met                                     | 1     | FALSE | chr9:21974774:G:A   | 110:chr9:21974774:G:A   | 0.001603 |
| 49_c12-1 | 49 | KRAS                        | MODERATE           | c.35G>A                                                                                                          | p.Gly12Asp                                     | 11213 | FALSE | chr12:25398284:C:T  | 110:chr12:25398284:C:T  | 0.00404  |
| 49_c12-1 | 49 | ROS1                        | MODERATE           | c.5651G>A                                                                                                        | p.Arg1884Lys                                   | 1     | FALSE | chr6:117642548:C:T  | 110:chr6:117642548:C:T  | 0.001418 |

|          |    |                    |                    |                                                           |                                       |   |       |                        |                                |          |
|----------|----|--------------------|--------------------|-----------------------------------------------------------|---------------------------------------|---|-------|------------------------|--------------------------------|----------|
| 49_c12-1 | 49 | C9orf53;<br>CDKN2A | MODIFIER; MODERATE | n.*616C>G<br>;<br>c.*140G>C<br>;<br>c.217G>C;<br>c.260G>C | p.Ala73Pro;<br>p.Arg87Pro             | 1 | FALSE | chr9:2197<br>1141:C:G  | 110:chr9:2<br>1971141:C<br>:G  | 0.011858 |
| 49_c12-1 | 49 | TSC2               | MODERATE           | c.1610G>A                                                 | p.Arg537His                           | 0 | FALSE | chr16:211<br>5530:G:A  | 110:chr16:<br>2115530:G<br>:A  | 0.001718 |
| 49_c12-1 | 49 | NF1                | MODERATE           | c.4463G>A<br>;<br>c.4526G>A                               | p.Arg1488Hi<br>s;<br>p.Arg1509Hi<br>s | 1 | FALSE | chr17:295<br>87482:G:A | 110:chr17:<br>29587482:<br>G:A | 0.001204 |
| 49_c12-1 | 49 | CDKN2A             | MODIFIER; MODERATE | c.194-<br>3568A>C;<br>c.52A>C                             | p.Thr18Pro                            | 1 | FALSE | chr9:2197<br>4775:T:G  | 110:chr9:2<br>1974775:T<br>:G  | 0.00817  |
| 49_c12-1 | 49 | AKT3               | MODERATE           | c.899C>T                                                  | p.Ala300Val                           | 0 | FALSE | chr1:2437<br>27071:G:A | 110:chr1:2<br>43727071:<br>G:A | 0.001196 |
| 49_c12-1 | 49 | C9orf53;<br>CDKN2A | MODIFIER; MODERATE | n.*616G>A<br>;<br>c.*324C>T;<br>c.*45C>T;<br>c.401C>T     | p.Ala134Val                           | 1 | FALSE | chr9:2197<br>0957:G:A  | 110:chr9:2<br>1970957:G<br>:A  | 0.00143  |
| 49_c12-1 | 49 | ROS1               | MODERATE           | c.5920G>A                                                 | p.Glu1974Ly<br>s                      | 1 | FALSE | chr6:1176<br>41051:C:T | 110:chr6:1<br>17641051:<br>C:T | 0.001294 |
| 49_c12-1 | 49 | KDR                | MODERATE           | c.2323G>T                                                 | p.Ala775Ser                           | 1 | FALSE | chr4:5596<br>4914:C:A  | 110:chr4:5<br>5964914:C<br>:A  | 0.001179 |
| 49_c12-1 | 49 | DDR2               | MODERATE           | c.1418G>A                                                 | p.Arg473His                           | 2 | FALSE | chr1:1627<br>40216:G:A | 110:chr1:1<br>62740216:<br>G:A | 0.001054 |
| 49_c12-1 | 49 | TSC2               | MODERATE           | c.1654G>A                                                 | p.Ala552Thr                           | 0 | FALSE | chr16:211<br>5574:G:A  | 110:chr16:<br>2115574:G<br>:A  | 0.001869 |
| 49_c12-1 | 49 | PHLPP1             | MODERATE           | c.2452G>A                                                 | p.Val818Ile                           | 0 | FALSE | chr18:605<br>70204:G:A | 110:chr18:<br>60570204:<br>G:A | 0.001859 |
| 86_c3-1  | 86 | RET                | MODERATE           | c.1444C>T                                                 | p.His482Tyr                           | 1 | FALSE | chr10:436<br>06835:C:T | 113:chr10:<br>43606835:<br>C:T | 0.000361 |
| 86_c3-1  | 86 | SMO                | MODERATE           | c.1234C>T                                                 | p.Leu412Ph<br>e                       | 0 | FALSE | chr7:1288<br>46398:C:T | 113:chr7:1<br>28846398:<br>C:T | 0.000501 |
| 86_c3-1  | 86 | NTHL1;<br>TSC2     | MODIFIER; MODERATE | c.-20C>T;<br>c.170G>A                                     | p.Arg57His                            | 0 | FALSE | chr16:210<br>0432:G:A  | 113:chr16:<br>2100432:G<br>:A  | 0.001354 |

|         |    |       |                    |                                                                                 |                                                                                                                 |    |       |                             |                                 |          |
|---------|----|-------|--------------------|---------------------------------------------------------------------------------|-----------------------------------------------------------------------------------------------------------------|----|-------|-----------------------------|---------------------------------|----------|
| 86_c3-1 | 86 | FGFR1 | MODERATE           | c.1150C>T;<br>c.1156C>T;<br>c.1393C>T;<br>c.1417C>T;<br>c.1423C>T;<br>c.1516C>T | p.Arg384Trp<br>;<br>p.Arg386Trp<br>;<br>p.Arg465Trp<br>;<br>p.Arg473Trp<br>;<br>p.Arg475Trp<br>;<br>p.Arg506Trp | 1  | FALSE | chr8:3827<br>5753:G:A       | 113:chr8:3<br>8275753:G<br>:A   | 0.000299 |
| 86_c3-1 | 86 | MET   | MODERATE           | c.3748A>G<br>;<br>c.3802A>G                                                     | p.Met1250V<br>al;<br>p.Met1268V<br>al                                                                           | 1  | FALSE | chr7:1164<br>23473:A:G      | 113:chr7:1<br>16423473:<br>A:G  | 0.00037  |
| 86_c3-1 | 86 | TP53  | MODERATE           | c.421C>T;<br>c.502C>T;<br>c.781C>T;<br>c.898C>T                                 | p.Pro141Ser<br>;<br>p.Pro168Ser<br>;<br>p.Pro261Ser<br>;<br>p.Pro300Ser                                         | 3  | FALSE | chr17:757<br>7040:G:A       | 113:chr17:<br>7577040:G<br>:A   | 0.000508 |
| 86_c3-1 | 86 | EGFR  | MODIFIER; HIGH     | c.*2133C><br>T;<br>c.*2364C><br>T;<br>c.2005C>T                                 | ; p.Arg669*                                                                                                     | 1  | FALSE | chr7:5524<br>0761:C:T       | 113:chr7:5<br>5240761:C<br>:T   | 0.000781 |
| 86_c3-1 | 86 | TP53  | MODIFIER; MODERATE | c.-5G>T;<br>c.356G>T;<br>c.473G>T;<br>c.77G>T                                   | ; p.Arg119Leu<br>;<br>p.Arg158Leu<br>;<br>p.Arg26Leu                                                            | 80 | FALSE | chr17:757<br>8457:C:A       | 113:chr17:<br>7578457:C<br>:A   | 0.00036  |
| 86_c3-1 | 86 | ATM   | MODERATE           | c.8228C>T                                                                       | p.Thr2743M<br>et                                                                                                | 0  | FALSE | chr11:108<br>206648:C:<br>T | 113:chr11:<br>10820664<br>8:C:T | 0.000371 |
| 86_c3-1 | 86 | BRAF  | HIGH               | c.1525C>T                                                                       | p.Arg509*                                                                                                       | 1  | FALSE | chr7:1404<br>76881:G:A      | 113:chr7:1<br>40476881:<br>G:A  | 0.000622 |
| 86_c3-1 | 86 | TP53  | MODIFIER; MODERATE | c.-26C>T;<br>c.335C>T;<br>c.452C>T;<br>c.56C>T                                  | ; p.Pro112Leu<br>;<br>p.Pro151Leu<br>;<br>p.Pro19Leu                                                            | 30 | FALSE | chr17:757<br>8478:G:A       | 113:chr17:<br>7578478:G<br>:A   | 0.000371 |
| 86_c3-1 | 86 | NF1   | LOW                | c.2850G>A                                                                       | p.Gln950Gln                                                                                                     | 1  | FALSE | chr17:295<br>56483:G:A      | 113:chr17:<br>29556483:<br>G:A  | 0.000828 |
| 86_c3-1 | 86 | NF1   | MODERATE           | c.6943G>A<br>;<br>c.7006G>A                                                     | p.Ala2315Th<br>r;<br>p.Ala2336Th<br>r                                                                           | 2  | FALSE | chr17:296<br>67607:G:A      | 113:chr17:<br>29667607:<br>G:A  | 0.000956 |



|         |    |                    |                            |                                                                                  |                                                                                          |   |       |                        |                                |          |
|---------|----|--------------------|----------------------------|----------------------------------------------------------------------------------|------------------------------------------------------------------------------------------|---|-------|------------------------|--------------------------------|----------|
| 86_c3-1 | 86 | FBXW7              | MODERATE                   | c.1088C>T;<br>c.1202C>T;<br>c.1442C>T                                            | p.Ala363Val;<br>p.Ala401Val;<br>p.Ala481Val                                              | 0 | FALSE | chr4:1532<br>47360:G:A | 113:chr4:1<br>53247360:<br>G:A | 0.000467 |
| 86_c3-1 | 86 | MIR4673;<br>NOTCH1 | MODIFIER; HIGH             | n.*59C>T;<br>c.1828C>T                                                           | ; p.Gln610*                                                                              | 0 | FALSE | chr9:1394<br>10010:G:A | 113:chr9:1<br>39410010:<br>G:A | 0.000715 |
| 86_c3-1 | 86 | TP53               | MODERATE; MODIFIER         | c.236C>T;<br>c.353C>T;<br>c.-279C>T;<br>c.-360C>T                                | p.Thr79Ile;<br>p.Thr118Ile;                                                              | 4 | FALSE | chr17:757<br>9334:G:A  | 113:chr17:<br>7579334:G<br>:A  | 0.000366 |
| 86_c3-1 | 86 | PIK3CA             | MODERATE                   | c.365G>A                                                                         | p.Gly122Asp                                                                              | 2 | FALSE | chr3:1789<br>17490:G:A | 113:chr3:1<br>78917490:<br>G:A | 0.00045  |
| 86_c3-1 | 86 | CTNNB1             | MODERATE                   | c.1972G>T                                                                        | p.Val658Phe                                                                              | 0 | FALSE | chr3:4127<br>8096:G:T  | 113:chr3:4<br>1278096:G<br>:T  | 0.002389 |
| 86_c3-1 | 86 | MITF               | MODIFIER; MODERATE         | c.93+115G<br>>A;<br>c.208G>A;<br>c.373G>A;<br>c.481G>A;<br>c.526G>A;<br>c.529G>A | ; p.Ala70Thr;<br>p.Ala125Thr<br>;<br>p.Ala161Thr<br>;<br>p.Ala176Thr<br>;<br>p.Ala177Thr | 0 | FALSE | chr3:6998<br>7147:G:A  | 113:chr3:6<br>9987147:G<br>:A  | 0.000715 |
| 86_c3-1 | 86 | FGFR1              | MODIFIER; MODERATE         | c.92-<br>1367C>T;<br>c.214C>T;<br>c.238C>T;<br>c.337C>T                          | ; p.Arg72Cys;<br>p.Arg80Cys;<br>p.Arg113Cys                                              | 1 | FALSE | chr8:3828<br>7320:G:A  | 113:chr8:3<br>8287320:G<br>:A  | 0.00022  |
| 86_c3-1 | 86 | C9orf53;<br>CDKN2A | MODIFIER; MODERATE;<br>LOW | n.*616G>A<br>;<br>c.*217C>T;<br>c.337C>T;<br>c.294C>T                            | p.Pro113Ser<br>; p.His98His                                                              | 1 | FALSE | chr9:2197<br>1064:G:A  | 113:chr9:2<br>1971064:G<br>:A  | 0.00062  |
| 86_c3-1 | 86 | CDH1               | MODERATE                   | c.2053G>A                                                                        | p.Val685Met                                                                              | 0 | FALSE | chr16:688<br>57418:G:A | 113:chr16:<br>68857418:<br>G:A | 0.000355 |
| 86_c3-1 | 86 | NOTCH1             | MODERATE                   | c.4718C>T                                                                        | p.Thr1573Met                                                                             | 0 | FALSE | chr9:1393<br>99425:G:A | 113:chr9:1<br>39399425:<br>G:A | 0.000446 |
| 86_c3-1 | 86 | AKT3               | MODERATE                   | c.899C>T                                                                         | p.Ala300Val                                                                              | 0 | FALSE | chr1:2437<br>27071:G:A | 113:chr1:2<br>43727071:<br>G:A | 0.000399 |

|         |    |        |                    |                                                     |                                                     |   |       |                        |                                |          |
|---------|----|--------|--------------------|-----------------------------------------------------|-----------------------------------------------------|---|-------|------------------------|--------------------------------|----------|
| 86_c3-1 | 86 | TP53   | MODIFIER; MODERATE | c.-29C>T;<br>c.332C>T;<br>c.449C>T;<br>c.53C>T      | ; p.Thr111Ile;<br>p.Thr150Ile;<br>p.Thr18Ile        | 4 | FALSE | chr17:757<br>8481:G:A  | 113:chr17:<br>7578481:G<br>:A  | 0.000563 |
| 86_c3-1 | 86 | ERBB2  | MODERATE; MODIFIER | c.1628C>T;<br>c.1673C>T;<br>c.1718C>T;<br>n.2042C>T | p.Ser543Leu<br>;<br>p.Ser558Leu<br>p.Ser573Leu      | 1 | FALSE | chr17:378<br>72839:C:T | 113:chr17:<br>37872839:<br>C:T | 0.001217 |
| 86_c3-1 | 86 | HGF    | MODERATE           | c.1172G>A<br>;<br>c.1187G>A                         | p.Gly391Asp<br>;<br>p.Gly396Asp                     | 0 | FALSE | chr7:8135<br>0145:C:T  | 113:chr7:8<br>1350145:C<br>:T  | 0.000497 |
| 86_c3-1 | 86 | NTRK1  | MODERATE           | c.1975C>T;<br>c.2065C>T;<br>c.2083C>T               | p.Pro659Ser<br>;<br>p.Pro689Ser<br>;<br>p.Pro695Ser | 2 | FALSE | chr1:1568<br>49827:C:T | 113:chr1:1<br>56849827:<br>C:T | 0.00048  |
| 86_c3-1 | 86 | SMO    | MODERATE           | c.1082A>C                                           | p.His361Pro                                         | 0 | FALSE | chr7:1288<br>46152:A:C | 113:chr7:1<br>28846152:<br>A:C | 0.000347 |
| 86_c3-1 | 86 | EGFR   | MODERATE           | c.755G>A                                            | p.Arg252His                                         | 3 | FALSE | chr7:5522<br>1711:G:A  | 113:chr7:5<br>5221711:G<br>:A  | 0.000804 |
| 86_c3-1 | 86 | EPHA3  | MODERATE           | c.1543G>A                                           | p.Ala515Thr                                         | 0 | FALSE | chr3:8944<br>8579:G:A  | 113:chr3:8<br>9448579:G<br>:A  | 0.000497 |
| 86_c3-1 | 86 | PDGFRA | MODERATE           | c.1198G>A                                           | p.Asp400As<br>n                                     | 1 | FALSE | chr4:5513<br>6876:G:A  | 113:chr4:5<br>5136876:G<br>:A  | 0.000343 |
| 86_c3-1 | 86 | KIT    | MODERATE           | c.2825G>A<br>;<br>c.2837G>A                         | p.Arg942Gln<br>;<br>p.Arg946Gln                     | 1 | FALSE | chr4:5560<br>4629:G:A  | 113:chr4:5<br>5604629:G<br>:A  | 0.000551 |
| 86_c3-1 | 86 | FGFR1  | MODIFIER; MODERATE | c.-34C>T;<br>c.158C>T;<br>c.59C>T                   | ; p.Thr53Ile;<br>p.Thr20Ile                         | 1 | FALSE | chr8:3831<br>4906:G:A  | 113:chr8:3<br>8314906:G<br>:A  | 0.000156 |
| 86_c3-1 | 86 | TP53   | MODERATE; MODIFIER | c.148C>T;<br>c.265C>T;<br>c.-279C>T;<br>c.-360C>T   | p.Pro50Ser;<br>p.Pro89Ser;                          | 3 | FALSE | chr17:757<br>9422:G:A  | 113:chr17:<br>7579422:G<br>:A  | 0.000472 |
| 86_c3-1 | 86 | EGFR   | MODIFIER; MODERATE | c.*2364G><br>A;<br>c.2104G>A                        | p.Ala702Thr                                         | 2 | FALSE | chr7:5524<br>1656:G:A  | 113:chr7:5<br>5241656:G<br>:A  | 0.000368 |
| 86_c3-1 | 86 | RET    | MODERATE           | c.1690A>C                                           | p.Thr564Pro                                         | 1 | FALSE | chr10:436<br>08342:A:C | 113:chr10:<br>43608342:<br>A:C | 0.011107 |
| 86_c3-1 | 86 | SMO    | HIGH               | c.767G>A                                            | p.Trp256*                                           | 0 | FALSE | chr7:1288<br>45470:G:A | 113:chr7:1<br>28845470:<br>G:A | 0.000306 |

|         |    |                 |                    |                                                                                                                                                                                |                                                                                                                      |    |       |                             |                                 |          |
|---------|----|-----------------|--------------------|--------------------------------------------------------------------------------------------------------------------------------------------------------------------------------|----------------------------------------------------------------------------------------------------------------------|----|-------|-----------------------------|---------------------------------|----------|
| 86_c3-1 | 86 | PIK3R1          | HIGH               | c.901C>T                                                                                                                                                                       | p.Arg301*                                                                                                            | 1  | FALSE | chr5:6757<br>6819:C:T       | 113:chr5:6<br>7576819:C<br>:T   | 0.00043  |
| 86_c3-1 | 86 | EGFR            | MODIFIER; MODERATE | c.*1464G><br>A;<br>c.1606G>A                                                                                                                                                   | ; p.Val536Me<br>t                                                                                                    | 1  | FALSE | chr7:5522<br>9299:G:A       | 113:chr7:5<br>5229299:G<br>:A   | 0.000362 |
| 86_c3-1 | 86 | TP53            | MODERATE; MODIFIER | c.257C>T;<br>c.374C>T;<br>c.-279C>T;<br>c.-360C>T                                                                                                                              | p.Thr86Met;<br>p.Thr125Me<br>t;                                                                                      | 18 | FALSE | chr17:757<br>9313:G:A       | 113:chr17:<br>7579313:G<br>:A   | 0.000609 |
| 86_c3-1 | 86 | FGFR1;<br>LETM2 | MODERATE; MODIFIER | c.1927C>T;<br>c.1933C>T;<br>c.2170C>T;<br>c.2194C>T;<br>c.2200C>T;<br>c.2293C>T;<br>c.*1406G><br>A;<br>c.*1423G><br>A;<br>c.*1553G><br>A;<br>c.*1567G><br>A;<br>c.*1638G><br>A | p.Arg643Trp<br>;<br>p.Arg645Trp<br>;<br>p.Arg724Trp<br>;<br>p.Arg732Trp<br>;<br>p.Arg734Trp<br>;<br>p.Arg765Trp<br>; | 1  | FALSE | chr8:3827<br>1528:G:A       | 113:chr8:3<br>8271528:G<br>:A   | 0.000482 |
| 86_c3-1 | 86 | ALK             | MODERATE           | c.536G>A                                                                                                                                                                       | p.Arg179His                                                                                                          | 1  | FALSE | chr2:3014<br>2990:C:T       | 113:chr2:3<br>0142990:C<br>:T   | 0.000316 |
| 86_c3-1 | 86 | ATM             | HIGH               | c.748C>T                                                                                                                                                                       | p.Arg250*                                                                                                            | 0  | FALSE | chr11:108<br>115600:C:<br>T | 113:chr11:<br>10811560<br>0:C:T | 0.000388 |
| 86_c3-1 | 86 | TP53            | MODERATE           | c.352T>G;<br>c.433T>G;<br>c.712T>G;<br>c.829T>G                                                                                                                                | p.Cys118Gly<br>;<br>p.Cys145Gly<br>;<br>p.Cys238Gly<br>;<br>p.Cys277Gly                                              | 5  | FALSE | chr17:757<br>7109:A:C       | 113:chr17:<br>7577109:A<br>:C   | 0.000533 |
| 86_c3-1 | 86 | CDKN2A          | MODIFIER; MODERATE | c.194-<br>3570C>G;<br>c.50C>G                                                                                                                                                  | ; p.Ala17Gly                                                                                                         | 1  | FALSE | chr9:2197<br>4777:G:C       | 113:chr9:2<br>1974777:G<br>:C   | 0.00182  |
| 86_c3-1 | 86 | NOTCH1          | MODERATE           | c.5837G>A                                                                                                                                                                      | p.Arg1946Hi<br>s                                                                                                     | 0  | FALSE | chr9:1393<br>95101:C:T      | 113:chr9:1<br>39395101:<br>C:T  | 0.000763 |
| 86_c3-1 | 86 | CTNNB1          | MODERATE           | c.1406G>A                                                                                                                                                                      | p.Arg469His                                                                                                          | 0  | FALSE | chr3:4127<br>5240:G:A       | 113:chr3:4<br>1275240:G<br>:A   | 0.000309 |

|         |    |        |                    |                                                    |                                                    |    |       |                             |                                 |          |
|---------|----|--------|--------------------|----------------------------------------------------|----------------------------------------------------|----|-------|-----------------------------|---------------------------------|----------|
| 86_c3-1 | 86 | MAP2K1 | MODERATE           | c.146G>A                                           | p.Arg49His                                         | 1  | FALSE | chr15:667<br>27430:G:A      | 113:chr15:<br>66727430:<br>G:A  | 0.000386 |
| 86_c3-1 | 86 | RET    | MODERATE           | c.1942G>A                                          | p.Val648Ile                                        | 2  | FALSE | chr10:436<br>09990:G:A      | 113:chr10:<br>43609990:<br>G:A  | 0.000295 |
| 86_c3-1 | 86 | PIK3CA | MODERATE           | c.1357G>A                                          | p.Glu453Lys                                        | 20 | FALSE | chr3:1789<br>28079:G:A      | 113:chr3:1<br>78928079:<br>G:A  | 0.000417 |
| 86_c3-1 | 86 | EGFR   | MODERATE           | c.977G>A                                           | p.Cys326Tyr                                        | 1  | FALSE | chr7:5522<br>3610:G:A       | 113:chr7:5<br>5223610:G<br>:A   | 0.000421 |
| 86_c3-1 | 86 | TP53   | MODERATE; MODIFIER | c.214C>T;<br>c.97C>T; c.-<br>279C>T; c.-<br>360C>T | p.Pro72Ser;<br>p.Pro33Ser;                         | 3  | FALSE | chr17:757<br>9473:G:A       | 113:chr17:<br>7579473:G<br>:A   | 0.000449 |
| 86_c3-1 | 86 | DDR2   | MODERATE           | c.700G>A                                           | p.Asp234As<br>n                                    | 1  | FALSE | chr1:1627<br>29614:G:A      | 113:chr1:1<br>62729614:<br>G:A  | 0.000576 |
| 86_c3-1 | 86 | NTRK3  | MODERATE           | c.1528C>T;<br>c.1552C>T                            | p.Arg510Cys<br>;<br>p.Arg518Cys                    | 0  | FALSE | chr15:885<br>76121:G:A      | 113:chr15:<br>88576121:<br>G:A  | 0.000387 |
| 86_c3-1 | 86 | TP53   | MODIFIER; MODERATE | c.-3G>A;<br>c.358G>A;<br>c.475G>A;<br>c.79G>A      | p.Ala120Thr<br>;<br>p.Ala159Thr<br>;<br>p.Ala27Thr | 23 | FALSE | chr17:757<br>8455:C:T       | 113:chr17:<br>7578455:C<br>:T   | 0.000533 |
| 86_c3-1 | 86 | CWH43  | MODERATE           | c.782G>A;<br>c.863G>A                              | p.Cys261Tyr<br>;<br>p.Cys288Tyr                    | 0  | FALSE | chr4:4900<br>5812:G:A       | 113:chr4:4<br>9005812:G<br>:A   | 0.000359 |
| 86_c3-1 | 86 | ATM    | MODERATE           | c.1048G>A                                          | p.Ala350Thr                                        | 0  | FALSE | chr11:108<br>117837:G:<br>A | 113:chr11:<br>10811783<br>7:G:A | 0.000418 |
| 86_c3-1 | 86 | PIK3CA | MODERATE           | c.3129G>T                                          | p.Met1043I<br>le                                   | 45 | FALSE | chr3:1789<br>52074:G:T      | 113:chr3:1<br>78952074:<br>G:T  | 0.003729 |
| 86_c3-1 | 86 | MET    | MODERATE           | c.142G>A                                           | p.Ala48Thr                                         | 1  | FALSE | chr7:1163<br>39280:G:A      | 113:chr7:1<br>16339280:<br>G:A  | 0.000485 |
| 86_c3-1 | 86 | MET    | HIGH               | c.1619G>A                                          | p.Trp540*                                          | 1  | FALSE | chr7:1163<br>80997:G:A      | 113:chr7:1<br>16380997:<br>G:A  | 0.000809 |
| 86_c3-1 | 86 | ALK    | MODERATE           | c.4523G>A                                          | p.Gly1508As<br>p                                   | 1  | FALSE | chr2:2941<br>6430:C:T       | 113:chr2:2<br>9416430:C<br>:T   | 0.000309 |
| 86_c3-1 | 86 | ALK    | MODERATE           | c.3592C>T                                          | p.Leu1198P<br>he                                   | 1  | FALSE | chr2:2944<br>3625:G:A       | 113:chr2:2<br>9443625:G<br>:A   | 0.000846 |

|         |    |                    |                            |                                                                                       |                                                                                                                 |   |       |                             |                                 |          |
|---------|----|--------------------|----------------------------|---------------------------------------------------------------------------------------|-----------------------------------------------------------------------------------------------------------------|---|-------|-----------------------------|---------------------------------|----------|
| 86_c3-1 | 86 | FGFR2              | MODERATE; MODIFIER         | c.148C>T;<br>c.226C>T;<br>c.493C>T;<br>n.795C>T                                       | p.Arg50Trp;<br>p.Arg76Trp;<br>p.Arg165Trp<br>;                                                                  | 1 | FALSE | chr10:123<br>310935:G:<br>A | 113:chr10:<br>12331093<br>5:G:A | 0.000615 |
| 86_c3-1 | 86 | PIK3CA             | MODERATE                   | c.3030G>A                                                                             | p.Met1010I<br>e                                                                                                 | 1 | FALSE | chr3:1789<br>51975:G:A      | 113:chr3:1<br>78951975:<br>G:A  | 0.000504 |
| 86_c3-1 | 86 | C9orf53;<br>CDKN2A | MODIFIER; MODERATE;<br>LOW | n.*616G>A<br>;<br>c.*223C>T;<br>c.343C>T;<br>c.300C>T                                 | p.Arg115Trp<br>;<br>p.Ala100Ala                                                                                 | 1 | FALSE | chr9:2197<br>1058:G:A       | 113:chr9:2<br>1971058:G<br>:A   | 0.000416 |
| 86_c3-1 | 86 | PKD1;<br>TSC2      | MODIFIER; MODERATE         | c.*13118A<br>>C;<br>c.*13121A<br>>C;<br>c.4080T>G<br>;<br>c.4212T>G<br>;<br>c.4281T>G | p.Ser1360Ar<br>g;<br>p.Ser1404Ar<br>g;<br>p.Ser1427Ar<br>g                                                      | 0 | FALSE | chr16:213<br>4504:T:G       | 113:chr16:<br>2134504:T<br>:G   | 0.001604 |
| 86_c3-1 | 86 | FGFR1              | MODERATE                   | c.1060C>T;<br>c.1066C>T;<br>c.1303C>T;<br>c.1327C>T;<br>c.1333C>T;<br>c.1426C>T       | p.Arg354Trp<br>;<br>p.Arg356Trp<br>;<br>p.Arg435Trp<br>;<br>p.Arg443Trp<br>;<br>p.Arg445Trp<br>;<br>p.Arg476Trp | 2 | FALSE | chr8:3827<br>5843:G:A       | 113:chr8:3<br>8275843:G<br>:A   | 0.000483 |
| 86_c3-1 | 86 | C9orf53;<br>CDKN2A | MODIFIER; MODERATE         | n.*616A>C<br>;<br>c.*137T>G<br>;<br>c.214T>G;<br>c.257T>G                             | p.Cys72Gly;<br>p.Leu86Arg                                                                                       | 1 | FALSE | chr9:2197<br>1144:A:C       | 113:chr9:2<br>1971144:A<br>:C   | 0.000768 |
| 86_c3-1 | 86 | TP53               | MODERATE                   | c.335A>G;<br>c.416A>G;<br>c.695A>G;<br>c.812A>G                                       | p.Glu112Gly<br>;<br>p.Glu139Gly<br>;<br>p.Glu232Gly<br>;<br>p.Glu271Gly                                         | 8 | FALSE | chr17:757<br>7126:T:C       | 113:chr17:<br>7577126:T<br>:C   | 0.001805 |
| 86_c3-1 | 86 | NOTCH1             | MODERATE                   | c.3631C>T                                                                             | p.Arg1211Tr<br>p                                                                                                | 0 | FALSE | chr9:1394<br>01769:G:A      | 113:chr9:1<br>39401769:<br>G:A  | 0.000738 |
| 86_c3-1 | 86 | CTNNB1             | LOW                        | c.1956G>A                                                                             | p.Ala652Ala                                                                                                     | 0 | FALSE | chr3:4127<br>8080:G:A       | 113:chr3:4<br>1278080:G<br>:A   | 0.000392 |

|         |    |                             |                         |                                                                               |                                                           |   |       |                     |                         |          |
|---------|----|-----------------------------|-------------------------|-------------------------------------------------------------------------------|-----------------------------------------------------------|---|-------|---------------------|-------------------------|----------|
| 86_c3-1 | 86 | IGF1R                       | MODERATE                | c.2035G>A                                                                     | p.Asp679Asn                                               | 0 | FALSE | chr15:99459939:G:A  | 113:chr15:99459939:G:A  | 0.000459 |
| 86_c3-1 | 86 | FGFR4                       | MODIFIER; MODERATE      | c.1098-65G>A;<br>c.1251+10G>A;<br>c.1067G>A                                   | p.Arg356His                                               | 1 | FALSE | chr5:176520342:G:A  | 113:chr5:176520342:G:A  | 0.000782 |
| 86_c3-1 | 86 | FGFR1                       | LOW; MODIFIER; MODERATE | c.-25C>T;<br>c.167C>T;<br>c.68C>T                                             | p.Pro56Leu;<br>p.Pro23Leu                                 | 1 | FALSE | chr8:38314897:G:A   | 113:chr8:38314897:G:A   | 0.000165 |
| 86_c3-1 | 86 | FGFR1                       | MODIFIER; MODERATE      | c.92-1373C>T;<br>c.208C>T;<br>c.232C>T;<br>c.331C>T                           | p.Arg70Cys;<br>p.Arg78Cys;<br>p.Arg111Cys                 | 1 | FALSE | chr8:38287326:G:A   | 113:chr8:38287326:G:A   | 0.000223 |
| 86_c3-1 | 86 | ALK                         | MODERATE                | c.872G>A                                                                      | p.Arg291His                                               | 1 | FALSE | chr2:29917796:C:T   | 113:chr2:29917796:C:T   | 0.000481 |
| 86_c3-1 | 86 | ERBB2;<br>MIEN1;<br>MIR4728 | MODERATE; MODIFIER      | c.2597G>A;<br>c.2642G>A;<br>c.2687G>A;<br>n.3011G>A;<br>c.*388C>T;<br>n.-1G>A | p.Arg866His;<br>p.Arg881His;<br>p.Arg896His               | 2 | FALSE | chr17:37881617:G:A  | 113:chr17:37881617:G:A  | 0.000498 |
| 86_c3-1 | 86 | EGFR                        | MODERATE                | c.445C>T                                                                      | p.Arg149Trp                                               | 1 | FALSE | chr7:55214319:C:T   | 113:chr7:55214319:C:T   | 0.00042  |
| 86_c3-1 | 86 | TP53                        | MODERATE                | c.176T>G;<br>c.257T>G;<br>c.536T>G;<br>c.653T>G                               | p.Val59Gly;<br>p.Val86Gly;<br>p.Val179Gly;<br>p.Val218Gly | 8 | FALSE | chr17:7578196:A:C   | 113:chr17:7578196:A:C   | 0.00081  |
| 86_c3-1 | 86 | CTNNB1                      | MODERATE                | c.1604G>A                                                                     | p.Arg535Gln                                               | 0 | FALSE | chr3:41275709:G:A   | 113:chr3:41275709:G:A   | 0.000576 |
| 86_c3-1 | 86 | MET                         | HIGH                    | c.2387C>A;<br>c.2441C>A                                                       | p.Ser796*;<br>p.Ser814*                                   | 1 | FALSE | chr7:116403126:C:A  | 113:chr7:116403126:C:A  | 0.000351 |
| 86_c3-1 | 86 | ATM                         | MODERATE                | c.8558C>T                                                                     | p.Thr2853Met                                              | 0 | FALSE | chr11:108216609:C:T | 113:chr11:108216609:C:T | 0.0004   |

|         |    |                   |                    |                                                                           |                                                                                             |    |       |                             |                                 |          |
|---------|----|-------------------|--------------------|---------------------------------------------------------------------------|---------------------------------------------------------------------------------------------|----|-------|-----------------------------|---------------------------------|----------|
| 86_c3-1 | 86 | FGFR3             | MODIFIER; MODERATE | c.931-398C>T;<br>c.1172C>T;<br>c.1178C>T                                  | ; p.Ala391Val;<br>p.Ala393Val                                                               | 34 | FALSE | chr4:1806<br>153:C:T        | 113:chr4:1<br>806153:C:<br>T    | 0.000481 |
| 86_c3-1 | 86 | EGFR              | MODERATE           | c.3025G>A                                                                 | p.Asp1009A<br>sn                                                                            | 1  | FALSE | chr7:5526<br>8959:G:A       | 113:chr7:5<br>5268959:G<br>:A   | 0.000385 |
| 86_c3-1 | 86 | IGF1R             | MODERATE           | c.3430G>A<br>;<br>c.3433G>A                                               | p.Glu1144Ly<br>s;<br>p.Glu1145Ly<br>s                                                       | 0  | FALSE | chr15:994<br>82565:G:A      | 113:chr15:<br>99482565:<br>G:A  | 0.000393 |
| 86_c3-1 | 86 | TSC2              | MODERATE           | c.3032G>A<br>;<br>c.3164G>A                                               | p.Gly1011As<br>p;<br>p.Gly1055As<br>p                                                       | 0  | FALSE | chr16:212<br>9309:G:A       | 113:chr16:<br>2129309:G<br>:A   | 0.000571 |
| 86_c3-1 | 86 | EGFR              | MODERATE           | c.406C>A                                                                  | p.Pro136Thr                                                                                 | 1  | FALSE | chr7:5521<br>1163:C:A       | 113:chr7:5<br>5211163:C<br>:A   | 0.000502 |
| 86_c3-1 | 86 | PIK3CA            | MODERATE           | c.333G>T                                                                  | p.Lys111Asn                                                                                 | 9  | FALSE | chr3:1789<br>16946:G:T      | 113:chr3:1<br>78916946:<br>G:T  | 0.004431 |
| 86_c3-1 | 86 | CDH1              | MODERATE           | c.1204G>A                                                                 | p.Asp402As<br>n                                                                             | 0  | FALSE | chr16:688<br>47282:G:A      | 113:chr16:<br>68847282:<br>G:A  | 0.000592 |
| 86_c3-1 | 86 | EGFR;<br>EGFR-AS1 | MODERATE; MODIFIER | c.2515G>A<br>; n.-1C>T                                                    | p.Ala839Thr<br>;                                                                            | 4  | FALSE | chr7:5525<br>9457:G:A       | 113:chr7:5<br>5259457:G<br>:A   | 0.000408 |
| 86_c3-1 | 86 | VHL               | MODIFIER; MODERATE | c.341-3202C>T;<br>c.412C>T                                                | ; p.Pro138Ser                                                                               | 0  | FALSE | chr3:1018<br>8269:C:T       | 113:chr3:1<br>0188269:C<br>:T   | 0.000389 |
| 86_c3-1 | 86 | FGFR1             | MODERATE           | c.359C>T;<br>c.365C>T;<br>c.608C>T;<br>c.626C>T;<br>c.632C>T;<br>c.725C>T | p.Ala120Val;<br>p.Ala122Val;<br>p.Ala203Val;<br>p.Ala209Val;<br>p.Ala211Val;<br>p.Ala242Val | 1  | FALSE | chr8:3828<br>3753:G:A       | 113:chr8:3<br>8283753:G<br>:A   | 0.000332 |
| 86_c3-1 | 86 | CTNNB1            | MODERATE           | c.497T>G                                                                  | p.Val166Gly                                                                                 | 0  | FALSE | chr3:4126<br>6826:T:G       | 113:chr3:4<br>1266826:T<br>:G   | 0.000937 |
| 86_c3-1 | 86 | KDR               | MODERATE           | c.2866C>T                                                                 | p.Pro956Ser                                                                                 | 1  | FALSE | chr4:5596<br>1074:G:A       | 113:chr4:5<br>5961074:G<br>:A   | 0.000365 |
| 86_c3-1 | 86 | ATM               | HIGH               | c.6100C>T                                                                 | p.Arg2034*                                                                                  | 0  | FALSE | chr11:108<br>186742:C:<br>T | 113:chr11:<br>10818674<br>2:C:T | 0.00053  |
| 86_c3-1 | 86 | SMO               | MODERATE           | c.469G>A                                                                  | p.Val157Me<br>t                                                                             | 0  | FALSE | chr7:1288<br>43362:G:A      | 113:chr7:1<br>28843362:<br>G:A  | 0.000448 |
| 86_c3-1 | 86 | APC               | MODIFIER; MODERATE | c.676-8832G>A;<br>c.647G>A                                                | ; p.Arg216Gln                                                                               | 0  | FALSE | chr5:1121<br>28144:G:A      | 113:chr5:1<br>12128144:<br>G:A  | 0.000448 |

|         |    |                            |                    |                                                                                                                      |                                                                         |    |       |                        |                                |          |
|---------|----|----------------------------|--------------------|----------------------------------------------------------------------------------------------------------------------|-------------------------------------------------------------------------|----|-------|------------------------|--------------------------------|----------|
| 86_c3-1 | 86 | GAPDH;<br>IFFO1;<br>NCAPD2 | MODERATE; MODIFIER | c.157G>A;<br>c.283G>A;<br>c.*1743C><br>T;<br>c.*1746C><br>T;<br>c.*1770C><br>T;<br>n.*2798C><br>T;<br>c.*4252G><br>A | p.Val53Ile;<br>p.Val95Ile;                                              | 0  | FALSE | chr12:664<br>6132:G:A  | 113:chr12:<br>6646132:G<br>:A  | 0.000324 |
| 86_c3-1 | 86 | PDGFRA                     | MODERATE           | c.1495G>A                                                                                                            | p.Val499Met                                                             | 2  | FALSE | chr4:5513<br>9834:G:A  | 113:chr4:5<br>5139834:G<br>:A  | 0.00093  |
| 86_c3-1 | 86 | EGFR                       | MODERATE           | c.1159C>A                                                                                                            | p.Leu387Met                                                             | 1  | FALSE | chr7:5522<br>4477:C:A  | 113:chr7:5<br>5224477:C<br>:A  | 0.000381 |
| 86_c3-1 | 86 | MET                        | MODERATE           | c.487T>C                                                                                                             | p.Ser163Pro                                                             | 1  | FALSE | chr7:1163<br>39625:T:C | 113:chr7:1<br>16339625:<br>T:C | 0.004306 |
| 86_c3-1 | 86 | SMO                        | MODERATE           | c.1640G>A                                                                                                            | p.Arg547His                                                             | 0  | FALSE | chr7:1288<br>50377:G:A | 113:chr7:1<br>28850377:<br>G:A | 0.000653 |
| 86_c3-1 | 86 | ALK                        | MODERATE           | c.446C>T                                                                                                             | p.Ala149Val                                                             | 1  | FALSE | chr2:3014<br>3080:G:A  | 113:chr2:3<br>0143080:G<br>:A  | 0.000538 |
| 86_c3-1 | 86 | IDH2;<br>ZNF710            | MODERATE; MODIFIER | c.1108G>A<br>;<br>c.718G>A;<br>c.952G>A;<br>c.*2147C><br>T                                                           | p.Ala370Thr<br>;<br>p.Ala240Thr<br>;<br>p.Ala318Thr<br>;                | 1  | FALSE | chr15:906<br>28303:C:T | 113:chr15:<br>90628303:<br>C:T | 0.000453 |
| 86_c3-1 | 86 | EGFR;<br>EGFR-AS1          | MODERATE; MODIFIER | c.2518G>A<br>; n.-1C>T                                                                                               | p.Ala840Thr<br>;                                                        | 2  | FALSE | chr7:5525<br>9460:G:A  | 113:chr7:5<br>5259460:G<br>:A  | 0.000407 |
| 86_c3-1 | 86 | TP53                       | MODERATE           | c.137A>C;<br>c.416A>C;<br>c.533A>C;<br>c.56A>C                                                                       | p.His46Pro;<br>p.His139Pro<br>;<br>p.His178Pro<br>; p.His19Pro          | 10 | FALSE | chr17:757<br>8397:T:G  | 113:chr17:<br>7578397:T<br>:G  | 0.002984 |
| 86_c3-1 | 86 | TP53                       | MODIFIER; MODERATE | c.*109G>A<br>;<br>c.*197G>A<br>;<br>c.1090G>A<br>;<br>c.613G>A;<br>c.694G>A;<br>c.973G>A                             | p.Ala364Thr<br>;<br>p.Ala205Thr<br>;<br>p.Ala232Thr<br>;<br>p.Ala325Thr | 1  | FALSE | chr17:757<br>3937:C:T  | 113:chr17:<br>7573937:C<br>:T  | 0.000494 |



|         |    |        |                    |                                                                                                             |                                                                                             |       |       |                     |                         |          |
|---------|----|--------|--------------------|-------------------------------------------------------------------------------------------------------------|---------------------------------------------------------------------------------------------|-------|-------|---------------------|-------------------------|----------|
| 86_c3-1 | 86 | GNA11  | MODERATE           | c.1052T>C                                                                                                   | p.Leu351Pro                                                                                 | 1     | FALSE | chr19:3121149:T:C   | 113:chr19:3121149:T:C   | 0.000962 |
| 86_c3-1 | 86 | KIT    | MODERATE           | c.1403C>T                                                                                                   | p.Pro468Leu                                                                                 | 2     | FALSE | chr4:55592079:C:T   | 113:chr4:55592079:C:T   | 0.000342 |
| 86_c3-1 | 86 | KDR    | MODERATE           | c.2315C>T                                                                                                   | p.Ala772Val                                                                                 | 1     | FALSE | chr4:55964922:G:A   | 113:chr4:55964922:G:A   | 0.000578 |
| 86_c3-1 | 86 | FGFR3  | MODERATE           | c.1162G>A;<br>c.1498G>A;<br>c.1504G>A                                                                       | p.Ala388Thr;<br>p.Ala500Thr;<br>p.Ala502Thr                                                 | 1     | FALSE | chr4:1807167:G:A    | 113:chr4:1807167:G:A    | 0.000443 |
| 86_c3-1 | 86 | NF1    | MODERATE           | c.4321C>T;<br>c.4384C>T                                                                                     | p.Arg1441Trp;<br>p.Arg1462Trp                                                               | 1     | FALSE | chr17:29586101:C:T  | 113:chr17:29586101:C:T  | 0.000432 |
| 86_c3-1 | 86 | PIK3CA | MODERATE           | c.3012G>A                                                                                                   | p.Met1004Ile                                                                                | 8     | FALSE | chr3:178951957:G:A  | 113:chr3:178951957:G:A  | 0.000342 |
| 86_c3-1 | 86 | KRAS   | MODERATE           | c.35G>A                                                                                                     | p.Gly12Asp                                                                                  | 11213 | FALSE | chr12:25398284:C:T  | 113:chr12:25398284:C:T  | 0.000358 |
| 86_c3-1 | 86 | FGFR2  | MODIFIER; MODERATE | c.939+4740G>A;<br>c.1165G>A;<br>c.1168G>A;<br>c.820G>A;<br>c.829G>A;<br>c.898G>A;<br>c.901G>A;<br>n.1615G>A | p.Ala389Thr;<br>p.Ala390Thr;<br>p.Ala274Thr;<br>p.Ala277Thr;<br>p.Ala300Thr;<br>p.Ala301Thr | 1     | FALSE | chr10:123274753:C:T | 113:chr10:123274753:C:T | 0.000336 |
| 86_c3-1 | 86 | EGFR   | MODIFIER; MODERATE | c.*2364G>A;<br>c.2156G>A                                                                                    | p.Gly719Asp                                                                                 | 51    | FALSE | chr7:55241708:G:A   | 113:chr7:55241708:G:A   | 0.000388 |
| 86_c3-1 | 86 | BRAF   | MODERATE           | c.1061G>A                                                                                                   | p.Arg354Gln                                                                                 | 3     | FALSE | chr7:140494187:C:T  | 113:chr7:140494187:C:T  | 0.000439 |
| 86_c3-1 | 86 | IGF1R  | MODERATE           | c.2824G>A;<br>c.2827G>A                                                                                     | p.Ala942Thr;<br>p.Ala943Thr                                                                 | 0     | FALSE | chr15:99472831:G:A  | 113:chr15:99472831:G:A  | 0.000742 |
| 86_c3-1 | 86 | TP53   | MODERATE; MODIFIER | c.134C>T;<br>c.251C>T;<br>c.-279C>T;<br>c.-360C>T                                                           | p.Ala45Val;<br>p.Ala84Val;                                                                  | 4     | FALSE | chr17:7579436:G:A   | 113:chr17:7579436:G:A   | 0.0007   |
| 86_c3-1 | 86 | TSC2   | MODERATE           | c.673G>A                                                                                                    | p.Val225Met                                                                                 | 0     | FALSE | chr16:2106669:G:A   | 113:chr16:2106669:G:A   | 0.000499 |

|         |    |                             |                    |                                                                                                                      |                                                |      |       |                    |                        |          |
|---------|----|-----------------------------|--------------------|----------------------------------------------------------------------------------------------------------------------|------------------------------------------------|------|-------|--------------------|------------------------|----------|
| 86_c3-1 | 86 | NTRK3                       | MODIFIER; MODERATE | c.1205-1502C>T;<br>c.1211C>T                                                                                         | ; p.Thr404Met                                  | 0    | FALSE | chr15:88671959:G:A | 113:chr15:88671959:G:A | 0.000393 |
| 86_c3-1 | 86 | PHLPP1                      | MODERATE           | c.3499G>A                                                                                                            | p.Ala1167Thr                                   | 0    | FALSE | chr18:60630644:G:A | 113:chr18:60630644:G:A | 0.000459 |
| 86_c3-1 | 86 | HRAS;<br>LRRCS6             | MODERATE; MODIFIER | c.248C>T;<br>c.-506G>A                                                                                               | p.Ala83Val;                                    | 1    | FALSE | chr11:533808:G:A   | 113:chr11:533808:G:A   | 0.000913 |
| 86_c3-1 | 86 | FGFR3;<br>LETM1             | MODERATE; MODIFIER | c.1808A>T;<br>c.2144A>T;<br>c.2150A>T;<br>c.*2517T>A                                                                 | p.Lys603Met;<br>p.Lys715Met;<br>p.Lys717Met;   | 1    | FALSE | chr4:1808386:A:T   | 113:chr4:1808386:A:T   | 0.000557 |
| 86_c3-1 | 86 | FGFR1                       | MODIFIER; MODERATE | c.92-1469C>T;<br>c.112C>T;<br>c.136C>T;<br>c.235C>T                                                                  | ; p.His38Tyr;<br>p.His46Tyr;<br>p.His79Tyr     | 1    | FALSE | chr8:38287422:G:A  | 113:chr8:38287422:G:A  | 0.000278 |
| 86_c3-1 | 86 | CDH1                        | MODERATE           | c.394G>A                                                                                                             | p.Val132Ile                                    | 0    | FALSE | chr16:68842333:G:A | 113:chr16:68842333:G:A | 0.000377 |
| 86_c3-1 | 86 | ERBB2;<br>MIEN1;<br>MIR4728 | MODIFIER; MODERATE | c.3160-213A>G;<br>c.3251A>G;<br>;<br>c.3296A>G;<br>;<br>c.3341A>G;<br>;<br>n.3665A>G;<br>;<br>c.*388T>C;<br>n.*67A>G | p.Glu1084Gly;<br>p.Glu1099Gly;<br>p.Glu1114Gly | 1    | FALSE | chr17:37883729:A:G | 113:chr17:37883729:A:G | 0.001338 |
| 86_c3-1 | 86 | CTNNB1                      | MODERATE           | c.86C>A                                                                                                              | p.Ser29Tyr                                     | 0    | FALSE | chr3:41266089:C:A  | 113:chr3:41266089:C:A  | 0.000387 |
| 86_c3-1 | 86 | STK11                       | MODERATE           | c.1105C>T                                                                                                            | p.Pro369Ser                                    | 1    | FALSE | chr19:1223168:C:T  | 113:chr19:1223168:C:T  | 0.000545 |
| 86_c3-1 | 86 | PIK3CA                      | MODERATE           | c.1633G>A                                                                                                            | p.Glu545Lys                                    | 1189 | FALSE | chr3:178936091:G:A | 113:chr3:178936091:G:A | 0.012058 |
| 86_c3-1 | 86 | EGFR                        | MODIFIER; MODERATE | c.*1464G>A;<br>c.1321G>A                                                                                             | ; p.Val441Ile                                  | 1    | FALSE | chr7:55227854:G:A  | 113:chr7:55227854:G:A  | 0.000412 |
| 86_c3-1 | 86 | HGF                         | HIGH               | c.1582C>T;<br>c.1597C>T                                                                                              | p.Arg528*;<br>p.Arg533*                        | 0    | FALSE | chr7:81336625:G:A  | 113:chr7:81336625:G:A  | 0.000577 |

|         |    |                    |                    |                                                  |                                                     |   |       |                             |                                 |          |
|---------|----|--------------------|--------------------|--------------------------------------------------|-----------------------------------------------------|---|-------|-----------------------------|---------------------------------|----------|
| 86_c3-1 | 86 | NF1                | HIGH               | c.3916C>T                                        | p.Arg1306*                                          | 8 | FALSE | chr17:295<br>62981:C:T      | 113:chr17:<br>29562981:<br>C:T  | 0.000359 |
| 86_c3-1 | 86 | FGFR2              | MODERATE; MODIFIER | c.263G>A;<br>c.341G>A;<br>c.608G>A;<br>n.910G>A  | p.Arg88His;<br>p.Arg114His<br>;<br>p.Arg203His<br>; | 2 | FALSE | chr10:123<br>310820:C:<br>T | 113:chr10:<br>12331082<br>0:C:T | 0.001122 |
| 86_c3-1 | 86 | ERBB2              | MODERATE; MODIFIER | c.632C>T;<br>c.677C>T;<br>c.722C>T;<br>n.1046C>T | p.Ala211Val;<br>p.Ala226Val;<br>p.Ala241Val;        | 2 | FALSE | chr17:378<br>66417:C:T      | 113:chr17:<br>37866417:<br>C:T  | 0.000487 |
| 86_c3-1 | 86 | NF1                | MODERATE           | c.2740C>T                                        | p.Arg914Trp                                         | 1 | FALSE | chr17:295<br>56373:C:T      | 113:chr17:<br>29556373:<br>C:T  | 0.000517 |
| 86_c3-1 | 86 | TSC1               | MODERATE           | c.388C>T;<br>c.541C>T                            | p.His130Tyr;<br>p.His181Tyr                         | 0 | FALSE | chr9:1357<br>97328:G:A      | 113:chr9:1<br>35797328:<br>G:A  | 0.000501 |
| 86_c3-1 | 86 | FBXW7              | MODERATE           | c.1160G>A<br>;<br>c.1274G>A<br>;<br>c.1514G>A    | p.Arg387His<br>;<br>p.Arg425His<br>;<br>p.Arg505His | 0 | FALSE | chr4:1532<br>47288:C:T      | 113:chr4:1<br>53247288:<br>C:T  | 0.001032 |
| 86_c3-1 | 86 | KIT                | MODERATE           | c.506G>A                                         | p.Gly169Asp                                         | 1 | FALSE | chr4:5556<br>4618:G:A       | 113:chr4:5<br>5564618:G<br>:A   | 0.00034  |
| 86_c3-1 | 86 | MIR4673;<br>NOTCH1 | MODIFIER; MODERATE | n.-1C>T;<br>c.392C>T                             | ;<br>p.Pro131Leu                                    | 0 | FALSE | chr9:1394<br>18180:G:A      | 113:chr9:1<br>39418180:<br>G:A  | 0.00053  |
| 86_c3-1 | 86 | SMO                | MODERATE           | c.961G>A                                         | p.Val321Me<br>t                                     | 0 | FALSE | chr7:1288<br>46031:G:A      | 113:chr7:1<br>28846031:<br>G:A  | 0.000284 |
| 86_c3-1 | 86 | KDR                | MODERATE           | c.1193T>C                                        | p.Val398Ala                                         | 1 | FALSE | chr4:5597<br>6632:A:G       | 113:chr4:5<br>5976632:A<br>:G   | 0.000577 |
| 86_c3-1 | 86 | DDR2               | MODERATE           | c.2141G>A                                        | p.Arg714Gln                                         | 1 | FALSE | chr1:1627<br>46018:G:A      | 113:chr1:1<br>62746018:<br>G:A  | 0.000495 |
| 86_c3-1 | 86 | CTNNB1             | MODERATE           | c.91C>A                                          | p.Leu31Met                                          | 0 | FALSE | chr3:4126<br>6094:C:A       | 113:chr3:4<br>1266094:C<br>:A   | 0.00038  |
| 86_c3-1 | 86 | EGFR;<br>EGFR-AS1  | MODERATE; MODIFIER | c.2305G>A<br>;<br>n.1257C>T                      | p.Val769Me<br>t;                                    | 3 | FALSE | chr7:5524<br>9007:G:A       | 113:chr7:5<br>5249007:G<br>:A   | 0.000579 |
| 86_c3-1 | 86 | NF1                | MODERATE           | c.103A>G                                         | p.Ser35Gly                                          | 1 | FALSE | chr17:294<br>83043:A:G      | 113:chr17:<br>29483043:<br>A:G  | 0.000432 |
| 86_c3-1 | 86 | EGFR;<br>EGFR-AS1  | MODERATE; MODIFIER | c.2612C>T;<br>n.-1G>A                            | p.Ala871Val;                                        | 3 | FALSE | chr7:5525<br>9554:C:T       | 113:chr7:5<br>5259554:C<br>:T   | 0.000549 |

|         |    |                   |                    |                                                                           |                                                                                                                 |   |       |                             |                                 |          |
|---------|----|-------------------|--------------------|---------------------------------------------------------------------------|-----------------------------------------------------------------------------------------------------------------|---|-------|-----------------------------|---------------------------------|----------|
| 86_c3-1 | 86 | FGFR1             | MODERATE           | c.292C>T;<br>c.298C>T;<br>c.541C>T;<br>c.559C>T;<br>c.565C>T;<br>c.658C>T | p.Arg98Cys;<br>p.Arg100Cys<br>;<br>p.Arg181Cys<br>;<br>p.Arg187Cys<br>;<br>p.Arg189Cys<br>;<br>p.Arg220Cys      | 1 | FALSE | chr8:3828<br>5495:G:A       | 113:chr8:3<br>8285495:G<br>:A   | 0.00063  |
| 86_c3-1 | 86 | EGFR;<br>EGFR-AS1 | MODERATE; MODIFIER | c.2327G>A<br>;<br>n.1235C>T                                               | p.Arg776His<br>;                                                                                                | 7 | FALSE | chr7:5524<br>9029:G:A       | 113:chr7:5<br>5249029:G<br>:A   | 0.000495 |
| 86_c3-1 | 86 | CTNNB1            | MODERATE           | c.125C>T                                                                  | p.Thr42Ile                                                                                                      | 0 | FALSE | chr3:4126<br>6128:C:T       | 113:chr3:4<br>1266128:C<br>:T   | 0.000377 |
| 86_c3-1 | 86 | FGFR4             | MODERATE           | c.1745G>A<br>;<br>c.1829G>A<br>;<br>c.1949G>A                             | p.Arg582His<br>;<br>p.Arg610His<br>;<br>p.Arg650His                                                             | 1 | FALSE | chr5:1765<br>23292:G:A      | 113:chr5:1<br>76523292:<br>G:A  | 0.001006 |
| 86_c3-1 | 86 | FGFR1             | MODERATE           | c.475C>T;<br>c.481C>T;<br>c.724C>T;<br>c.742C>T;<br>c.748C>T;<br>c.841C>T | p.Arg159Trp<br>;<br>p.Arg161Trp<br>;<br>p.Arg242Trp<br>;<br>p.Arg248Trp<br>;<br>p.Arg250Trp<br>;<br>p.Arg281Trp | 2 | FALSE | chr8:3828<br>2215:G:A       | 113:chr8:3<br>8282215:G<br>:A   | 0.000639 |
| 86_c3-1 | 86 | ALK               | HIGH               | c.4414G>T                                                                 | p.Glu1472*                                                                                                      | 1 | FALSE | chr2:2941<br>6539:C:A       | 113:chr2:2<br>9416539:C<br>:A   | 0.000288 |
| 86_c3-1 | 86 | CDH1              | MODERATE           | c.1901C>T                                                                 | p.Ala634Val                                                                                                     | 0 | FALSE | chr16:688<br>56093:C:T      | 113:chr16:<br>68856093:<br>C:T  | 0.000474 |
| 86_c3-1 | 86 | DDR2              | MODERATE           | c.1624G>A                                                                 | p.Ala542Thr                                                                                                     | 1 | FALSE | chr1:1627<br>41933:G:A      | 113:chr1:1<br>62741933:<br>G:A  | 0.000504 |
| 86_c3-1 | 86 | EGFR              | MODERATE           | c.1789G>A                                                                 | p.Ala597Thr                                                                                                     | 1 | FALSE | chr7:5523<br>3039:G:A       | 113:chr7:5<br>5233039:G<br>:A   | 0.000999 |
| 86_c3-1 | 86 | ATM               | MODERATE           | c.5833G>A                                                                 | p.Ala1945Th<br>r                                                                                                | 0 | FALSE | chr11:108<br>180957:G:<br>A | 113:chr11:<br>10818095<br>7:G:A | 0.000386 |
| 86_c3-1 | 86 | CDKN2A            | MODIFIER; MODERATE | c.194-<br>3567C>T;<br>c.53C>T                                             | p.Thr18Met                                                                                                      | 1 | FALSE | chr9:2197<br>4774:G:A       | 113:chr9:2<br>1974774:G<br>:A   | 0.000505 |
| 86_c3-1 | 86 | EGFR;<br>EGFR-AS1 | MODERATE; MODIFIER | c.2575G>A<br>; n.-1C>T                                                    | p.Ala859Thr<br>;                                                                                                | 4 | FALSE | chr7:5525<br>9517:G:A       | 113:chr7:5<br>5259517:G<br>:A   | 0.000617 |
| 86_c3-1 | 86 | NOTCH1            | MODERATE           | c.5098G>A                                                                 | p.Ala1700Th<br>r                                                                                                | 0 | FALSE | chr9:1393<br>97703:C:T      | 113:chr9:1<br>39397703:<br>C:T  | 0.000493 |

|         |    |        |                    |                                                    |                                                                         |     |       |                        |                                |          |
|---------|----|--------|--------------------|----------------------------------------------------|-------------------------------------------------------------------------|-----|-------|------------------------|--------------------------------|----------|
| 86_c3-1 | 86 | TP53   | MODERATE           | c.350C>T;<br>c.431C>T;<br>c.710C>T;<br>c.827C>T    | p.Ala117Val;<br>p.Ala144Val;<br>p.Ala237Val;<br>p.Ala276Val             | 10  | FALSE | chr17:757<br>7111:G:A  | 113:chr17:<br>7577111:G<br>:A  | 0.000354 |
| 86_c3-1 | 86 | TP53   | HIGH               | c.160C>T;<br>c.241C>T;<br>c.520C>T;<br>c.637C>T    | p.Arg54*;<br>p.Arg81*;<br>p.Arg174*;<br>p.Arg213*                       | 291 | FALSE | chr17:757<br>8212:G:A  | 113:chr17:<br>7578212:G<br>:A  | 0.000482 |
| 86_c3-1 | 86 | ALK    | MODERATE           | c.617C>T                                           | p.Ala206Val                                                             | 2   | FALSE | chr2:3014<br>2909:G:A  | 113:chr2:3<br>0142909:G<br>:A  | 0.000415 |
| 86_c3-1 | 86 | NRAS   | MODERATE           | c.394G>A                                           | p.Glu132Lys                                                             | 2   | FALSE | chr1:1152<br>52246:C:T | 113:chr1:1<br>15252246:<br>C:T | 0.000368 |
| 86_c3-1 | 86 | SMO    | MODERATE           | c.1193G>A                                          | p.Arg398Gln                                                             | 0   | FALSE | chr7:1288<br>46357:G:A | 113:chr7:1<br>28846357:<br>G:A | 0.000291 |
| 86_c3-1 | 86 | TP53   | MODERATE           | c.323G>T;<br>c.404G>T;<br>c.683G>T;<br>c.800G>T    | p.Arg108Leu<br>;<br>p.Arg135Leu<br>;<br>p.Arg228Leu<br>;<br>p.Arg267Leu | 18  | FALSE | chr17:757<br>7138:C:A  | 113:chr17:<br>7577138:C<br>:A  | 0.000402 |
| 86_c3-1 | 86 | CTNNB1 | MODERATE           | c.59C>T                                            | p.Ala20Val                                                              | 0   | FALSE | chr3:4126<br>6062:C:T  | 113:chr3:4<br>1266062:C<br>:T  | 0.000788 |
| 86_c3-1 | 86 | ALK    | MODERATE           | c.3626G>A                                          | p.Arg1209Gln                                                            | 2   | FALSE | chr2:2944<br>3591:C:T  | 113:chr2:2<br>9443591:C<br>:T  | 0.000501 |
| 86_c3-1 | 86 | TP53   | MODERATE; MODIFIER | c.206C>T;<br>c.89C>T; c.-<br>279C>T; c.-<br>360C>T | p.Ala69Val;<br>p.Ala30Val;                                              | 3   | FALSE | chr17:757<br>9481:G:A  | 113:chr17:<br>7579481:G<br>:A  | 0.000446 |
| 86_c3-1 | 86 | PDGFRA | MODERATE           | c.1013A>G                                          | p.Glu338Gly                                                             | 2   | FALSE | chr4:5513<br>3800:A:G  | 113:chr4:5<br>5133800:A<br>:G  | 0.000429 |
| 86_c3-1 | 86 | VHL    | MODIFIER; MODERATE | c.341-<br>3270A>C;<br>c.344A>C                     | p.His115Pro                                                             | 0   | FALSE | chr3:1018<br>8201:A:C  | 113:chr3:1<br>0188201:A<br>:C  | 0.002153 |
| 86_c3-1 | 86 | APC    | MODERATE           | c.1198G>A<br>;<br>c.1252G>A                        | p.Glu400Lys<br>;<br>p.Glu418Lys                                         | 0   | FALSE | chr5:1121<br>54981:G:A | 113:chr5:1<br>12154981:<br>G:A | 0.000356 |
| 86_c3-1 | 86 | ALK    | MODERATE           | c.584C>T                                           | p.Ala195Val                                                             | 1   | FALSE | chr2:3014<br>2942:G:A  | 113:chr2:3<br>0142942:G<br>:A  | 0.000617 |

|         |    |                             |                    |                                                                                                |                                                             |   |       |                             |                                 |          |
|---------|----|-----------------------------|--------------------|------------------------------------------------------------------------------------------------|-------------------------------------------------------------|---|-------|-----------------------------|---------------------------------|----------|
| 86_c3-1 | 86 | ERBB2;<br>MIR4728           | MODERATE; MODIFIER | c.2211C>G<br>;<br>c.2256C>G<br>;<br>c.2301C>G<br>;<br>n.2625C>G<br>; n.-1C>G                   | p.Ile737Met<br>;<br>p.Ile752Met<br>;<br>p.Ile767Met<br>;    | 6 | FALSE | chr17:378<br>80257:C:G      | 113:chr17:<br>37880257:<br>C:G  | 0.020701 |
| 86_c3-1 | 86 | RPL19                       | MODERATE           | c.406C>T                                                                                       | p.Arg136Trp                                                 | 0 | FALSE | chr17:373<br>60379:C:T      | 113:chr17:<br>37360379:<br>C:T  | 0.000543 |
| 86_c3-1 | 86 | ATM                         | MODERATE           | c.1619G>A                                                                                      | p.Cys540Tyr                                                 | 0 | FALSE | chr11:108<br>122575:G:<br>A | 113:chr11:<br>10812257<br>5:G:A | 0.000405 |
| 86_c3-1 | 86 | MAP2K2                      | MODERATE           | c.169T>C                                                                                       | p.Phe57Leu                                                  | 0 | FALSE | chr19:411<br>7551:A:G       | 113:chr19:<br>4117551:A<br>:G   | 0.000487 |
| 86_c3-1 | 86 | CTNNB1                      | MODERATE           | c.1346G>A                                                                                      | p.Arg449His                                                 | 0 | FALSE | chr3:4127<br>5180:G:A       | 113:chr3:4<br>1275180:G<br>:A   | 0.000305 |
| 86_c3-1 | 86 | ERBB2;<br>MIEN1;<br>MIR4728 | MODERATE; MODIFIER | c.3025G>A<br>;<br>c.3070G>A<br>;<br>c.3115G>A<br>;<br>n.3439G>A<br>;<br>c.*388C>T;<br>n.*67G>A | p.Ala1009Th<br>r;<br>p.Ala1024Th<br>r;<br>p.Ala1039Th<br>r; | 2 | FALSE | chr17:378<br>83212:G:A      | 113:chr17:<br>37883212:<br>G:A  | 0.001036 |
| 86_c3-1 | 86 | PIK3R1                      | MODERATE           | c.514G>A                                                                                       | p.Val172Me<br>t                                             | 1 | FALSE | chr5:6757<br>5441:G:A       | 113:chr5:6<br>7575441:G<br>:A   | 0.000477 |
| 86_c3-1 | 86 | EGFR;<br>EGFR-AS1           | MODERATE; MODIFIER | c.2614G>A<br>; n.-1C>T                                                                         | p.Glu872Lys<br>;                                            | 1 | FALSE | chr7:5525<br>9556:G:A       | 113:chr7:5<br>5259556:G<br>:A   | 0.000562 |
| 86_c3-1 | 86 | SMO                         | MODERATE           | c.628G>A                                                                                       | p.Val210Me<br>t                                             | 0 | FALSE | chr7:1288<br>45134:G:A      | 113:chr7:1<br>28845134:<br>G:A  | 0.000358 |
| 86_c3-1 | 86 | MAP2K1                      | MODERATE           | c.361T>A                                                                                       | p.Cys121Ser                                                 | 4 | FALSE | chr15:667<br>29153:T:A      | 113:chr15:<br>66729153:<br>T:A  | 0.000479 |
| 86_c3-1 | 86 | MAP2K1                      | MODERATE           | c.379G>A                                                                                       | p.Val127Me<br>t                                             | 1 | FALSE | chr15:667<br>29171:G:A      | 113:chr15:<br>66729171:<br>G:A  | 0.000452 |
| 86_c3-1 | 86 | NF1                         | MODERATE           | c.8170G>A<br>;<br>c.8233G>A                                                                    | p.Gly2724Ar<br>g;<br>p.Gly2745Ar<br>g                       | 2 | FALSE | chr17:296<br>87577:G:A      | 113:chr17:<br>29687577:<br>G:A  | 0.000373 |
| 86_c3-1 | 86 | EGFR;<br>EGFR-AS1           | MODERATE; MODIFIER | c.2591C>T;<br>n.-1G>A                                                                          | p.Ala864Val;                                                | 2 | FALSE | chr7:5525<br>9533:C:T       | 113:chr7:5<br>5259533:C<br>:T   | 0.000651 |

|         |    |                 |                    |                                                                              |                                                                                                                     |    |       |                             |                                 |          |
|---------|----|-----------------|--------------------|------------------------------------------------------------------------------|---------------------------------------------------------------------------------------------------------------------|----|-------|-----------------------------|---------------------------------|----------|
| 86_c3-1 | 86 | ERBB2           | MODERATE; MODIFIER | c.1306G>A<br>;<br>c.1351G>A<br>;<br>c.1396G>A<br>;<br>n.1720G>A              | p.Ala436Thr<br>;<br>p.Ala451Thr<br>;<br>p.Ala466Thr<br>;                                                            | 1  | FALSE | chr17:378<br>72075:G:A      | 113:chr17:<br>37872075:<br>G:A  | 0.000341 |
| 86_c3-1 | 86 | CDH1            | MODERATE           | c.2204C>T                                                                    | p.Ala735Val                                                                                                         | 0  | FALSE | chr16:688<br>62116:C:T      | 113:chr16:<br>68862116:<br>C:T  | 0.00033  |
| 86_c3-1 | 86 | EPHA3           | MODERATE           | c.1516G>A                                                                    | p.Val506Ile                                                                                                         | 0  | FALSE | chr3:8944<br>8552:G:A       | 113:chr3:8<br>9448552:G<br>:A   | 0.000517 |
| 86_c3-1 | 86 | EGFR            | MODERATE           | c.866C>T                                                                     | p.Ala289Val                                                                                                         | 34 | FALSE | chr7:5522<br>1822:C:T       | 113:chr7:5<br>5221822:C<br>:T   | 0.000399 |
| 86_c3-1 | 86 | FGFR1           | MODERATE           | c.1013C>T;<br>c.1019C>T;<br>c.1112C>T;<br>c.746C>T;<br>c.752C>T;<br>c.995C>T | p.Thr338Me<br>t;<br>p.Thr340Me<br>t;<br>p.Thr371Me<br>t;<br>p.Thr249Me<br>t;<br>p.Thr251Me<br>t;<br>p.Thr332Me<br>t | 2  | FALSE | chr8:3827<br>9377:G:A       | 113:chr8:3<br>8279377:G<br>:A   | 0.000584 |
| 86_c3-1 | 86 | AKT1            | MODERATE           | c.238T>C                                                                     | p.Trp80Arg                                                                                                          | 2  | FALSE | chr14:105<br>243045:A:<br>G | 113:chr14:<br>10524304<br>5:A:G | 0.000448 |
| 86_c3-1 | 86 | FGFR3           | MODERATE           | c.905G>A                                                                     | p.Gly302Asp                                                                                                         | 1  | FALSE | chr4:1803<br>727:G:A        | 113:chr4:1<br>803727:G:<br>A    | 0.000865 |
| 86_c3-1 | 86 | RET             | MODERATE           | c.2267C>T                                                                    | p.Ala756Val                                                                                                         | 1  | FALSE | chr10:436<br>12162:C:T      | 113:chr10:<br>43612162:<br>C:T  | 0.00044  |
| 86_c3-1 | 86 | INSRR;<br>NTRK1 | MODIFIER; MODERATE | c.3397+13<br>C>T;<br>c.28G>A                                                 | p.Ala10Thr                                                                                                          | 1  | FALSE | chr1:1568<br>11891:G:A      | 113:chr1:1<br>56811891:<br>G:A  | 0.000327 |
| 86_c3-1 | 86 | KIT             | MODERATE           | c.2651G>A<br>;<br>c.2663G>A                                                  | p.Arg884Gln<br>;<br>p.Arg888Gln                                                                                     | 3  | FALSE | chr4:5560<br>2953:G:A       | 113:chr4:5<br>5602953:G<br>:A   | 0.000315 |
| 86_c3-1 | 86 | KDR             | MODERATE           | c.2323G>T                                                                    | p.Ala775Ser                                                                                                         | 1  | FALSE | chr4:5596<br>4914:C:A       | 113:chr4:5<br>5964914:C<br>:A   | 0.004261 |

|         |    |                    |                    |                                                                                                                                                                                                        |                                                                                                                      |   |       |                        |                                |          |
|---------|----|--------------------|--------------------|--------------------------------------------------------------------------------------------------------------------------------------------------------------------------------------------------------|----------------------------------------------------------------------------------------------------------------------|---|-------|------------------------|--------------------------------|----------|
| 86_c3-1 | 86 | FGFR1;<br>LETM2    | MODERATE; MODIFIER | c.1777T>G<br>;<br>c.1783T>G<br>;<br>c.2020T>G<br>;<br>c.2044T>G<br>;<br>c.2050T>G<br>;<br>c.2143T>G<br>;<br>c.*1406A><br>C;<br>c.*1423A><br>C;<br>c.*1553A><br>C;<br>c.*1567A><br>C;<br>c.*1638A><br>C | p.Trp593Gly<br>;<br>p.Trp595Gly<br>;<br>p.Trp674Gly<br>;<br>p.Trp682Gly<br>;<br>p.Trp684Gly<br>;<br>p.Trp715Gly<br>; | 1 | FALSE | chr8:3827<br>1806:A:C  | 113:chr8:3<br>8271806:A<br>:C  | 0.001329 |
| 86_c3-1 | 86 | PIK3CA             | MODERATE           | c.2078G>A                                                                                                                                                                                              | p.Arg693His                                                                                                          | 1 | FALSE | chr3:1789<br>38836:G:A | 113:chr3:1<br>78938836:<br>G:A | 0.000921 |
| 86_c3-1 | 86 | ALK                | MODERATE           | c.3599C>T                                                                                                                                                                                              | p.Ala1200Val                                                                                                         | 2 | FALSE | chr2:2944<br>3618:G:A  | 113:chr2:2<br>9443618:G<br>:A  | 0.000429 |
| 86_c3-1 | 86 | C9orf53;<br>CDKN2A | MODIFIER; MODERATE | n.*616C>G<br>;<br>c.*140G>C<br>;<br>c.217G>C;<br>c.260G>C                                                                                                                                              | p.Ala73Pro;<br>p.Arg87Pro                                                                                            | 1 | FALSE | chr9:2197<br>1141:C:G  | 113:chr9:2<br>1971141:C<br>:G  | 0.01012  |
| 86_c3-1 | 86 | IGF1R              | MODERATE           | c.3905T>C;<br>c.3908T>C                                                                                                                                                                                | p.Val1302Ala;<br>p.Val1303Ala                                                                                        | 0 | FALSE | chr15:995<br>00475:T:C | 113:chr15:<br>99500475:<br>T:C | 0.005192 |
| 86_c3-1 | 86 | EGFR               | MODERATE           | c.1774G>A                                                                                                                                                                                              | p.Val592Ile                                                                                                          | 1 | FALSE | chr7:5523<br>3024:G:A  | 113:chr7:5<br>5233024:G<br>:A  | 0.000472 |
| 86_c3-1 | 86 | PIK3CA             | MODERATE           | c.1531G>A                                                                                                                                                                                              | p.Ala511Thr                                                                                                          | 1 | FALSE | chr3:1789<br>28345:G:A | 113:chr3:1<br>78928345:<br>G:A | 0.000456 |
| 86_c3-1 | 86 | FGFR1              | MODERATE           | c.1424A>G<br>;<br>c.1430A>G<br>;<br>c.1667A>G<br>;<br>c.1691A>G<br>;<br>c.1697A>G<br>;<br>c.1790A>G                                                                                                    | p.Lys475Arg<br>;<br>p.Lys477Arg<br>;<br>p.Lys556Arg<br>;<br>p.Lys564Arg<br>;<br>p.Lys566Arg<br>;<br>p.Lys597Arg      | 1 | FALSE | chr8:3827<br>3545:T:C  | 113:chr8:3<br>8273545:T<br>:C  | 0.000639 |



|         |    |                             |                            |                                                                                               |                                                                                            |   |       |                        |                                |          |
|---------|----|-----------------------------|----------------------------|-----------------------------------------------------------------------------------------------|--------------------------------------------------------------------------------------------|---|-------|------------------------|--------------------------------|----------|
| 86_c3-1 | 86 | ERBB2;<br>MIEN1;<br>MIR4728 | MODERATE; MODIFIER         | c.2600G>A<br>;<br>c.2645G>A<br>;<br>c.2690G>A<br>;<br>n.3014G>A<br>;<br>c.*388C>T;<br>n.-1G>A | p.Arg867Gln<br>;<br>p.Arg882Gln<br>;<br>p.Arg897Gln<br>;                                   | 2 | FALSE | chr17:378<br>81620:G:A | 113:chr17:<br>37881620:<br>G:A | 0.000496 |
| 86_c3-1 | 86 | MET                         | MODERATE                   | c.3973G>A<br>;<br>c.4027G>A                                                                   | p.Glu1325Ly<br>s;<br>p.Glu1343Ly<br>s                                                      | 1 | FALSE | chr7:1164<br>35978:G:A | 113:chr7:1<br>16435978:<br>G:A | 0.00035  |
| 86_c3-1 | 86 | C9orf53;<br>CDKN2A          | MODIFIER; MODERATE         | n.*616G>A<br>;<br>c.*324C>T;<br>c.*45C>T;<br>c.401C>T                                         | p.Ala134Val<br>;                                                                           | 1 | FALSE | chr9:2197<br>0957:G:A  | 113:chr9:2<br>1970957:G<br>:A  | 0.000459 |
| 86_c3-1 | 86 | CTNNB1                      | MODERATE                   | c.643G>A                                                                                      | p.Ala215Thr                                                                                | 0 | FALSE | chr3:4126<br>6972:G:A  | 113:chr3:4<br>1266972:G<br>:A  | 0.000492 |
| 86_c3-1 | 86 | MIR4673;<br>NOTCH1          | MODIFIER; MODERATE         | n.*59C>T;<br>c.1057C>T                                                                        | p.Arg353Cys<br>;                                                                           | 0 | FALSE | chr9:1394<br>13085:G:A | 113:chr9:1<br>39413085:<br>G:A | 0.000538 |
| 86_c3-1 | 86 | MITF                        | MODIFIER; MODERATE         | c.93+143C<br>>T;<br>c.236C>T;<br>c.401C>T;<br>c.509C>T;<br>c.554C>T;<br>c.557C>T              | p.Thr79Met;<br>p.Thr134Me<br>t;<br>p.Thr170Me<br>t;<br>p.Thr185Me<br>t;<br>p.Thr186Me<br>t | 0 | FALSE | chr3:6998<br>7175:C:T  | 113:chr3:6<br>9987175:C<br>:T  | 0.000469 |
| 86_c3-1 | 86 | KLLN;<br>PTEN               | MODIFIER; MODERATE         | c.-951T>C;<br>c.20A>G                                                                         | p.Glu7Gly<br>;                                                                             | 1 | FALSE | chr10:896<br>24246:A:G | 113:chr10:<br>89624246:<br>A:G | 0.000524 |
| 86_c3-1 | 86 | C9orf53;<br>CDKN2A          | MODIFIER; MODERATE;<br>LOW | n.*616T>G<br>;<br>c.*120A>C<br>;<br>c.197A>C;<br>c.240A>C                                     | p.His66Pro;<br>p.Pro80Pro                                                                  | 1 | FALSE | chr9:2197<br>1161:T:G  | 113:chr9:2<br>1971161:T<br>:G  | 0.02448  |
| 86_c3-1 | 86 | PIK3R1                      | MODERATE                   | c.553G>A                                                                                      | p.Ala185Thr                                                                                | 1 | FALSE | chr5:6757<br>5480:G:A  | 113:chr5:6<br>7575480:G<br>:A  | 0.00039  |
| 86_c3-1 | 86 | EPHA3                       | MODERATE                   | c.485T>C                                                                                      | p.Leu162Pro                                                                                | 0 | FALSE | chr3:8925<br>9341:T:C  | 113:chr3:8<br>9259341:T<br>:C  | 0.000518 |
| 86_c3-1 | 86 | FBXW7                       | HIGH                       | c.310C>T;<br>c.424C>T;<br>c.664C>T                                                            | p.Arg104*;<br>p.Arg142*;<br>p.Arg222*                                                      | 0 | FALSE | chr4:1532<br>68144:G:A | 113:chr4:1<br>53268144:<br>G:A | 0.000351 |

|         |    |                             |                    |                                                                                               |                                                          |   |       |                        |                                |          |
|---------|----|-----------------------------|--------------------|-----------------------------------------------------------------------------------------------|----------------------------------------------------------|---|-------|------------------------|--------------------------------|----------|
| 86_c3-1 | 86 | INSRR;<br>NTRK1             | MODIFIER; MODERATE | c.3397+28<br>C>T;<br>c.13G>A                                                                  | ; p.Ala5Thr                                              | 3 | FALSE | chr1:1568<br>11876:G:A | 113:chr1:1<br>56811876:<br>G:A | 0.000343 |
| 86_c3-1 | 86 | ERBB2;<br>MIEN1;<br>MIR4728 | MODERATE; MODIFIER | c.2261G>A<br>;<br>c.2306G>A<br>;<br>c.2351G>A<br>;<br>n.2675G>A<br>;<br>c.*388C>T;<br>n.-1G>A | p.Arg754His<br>;<br>p.Arg769His<br>;<br>p.Arg784His<br>; | 1 | FALSE | chr17:378<br>81022:G:A | 113:chr17:<br>37881022:<br>G:A | 0.000345 |
| 86_c3-1 | 86 | TSC2                        | MODERATE           | c.2152C>T                                                                                     | p.Arg718Cys                                              | 0 | FALSE | chr16:212<br>2296:C:T  | 113:chr16:<br>2122296:C<br>:T  | 0.00033  |
| 86_c3-1 | 86 | IDH1                        | MODERATE           | c.941G>A                                                                                      | p.Arg314His                                              | 1 | FALSE | chr2:2091<br>04637:C:T | 113:chr2:2<br>09104637:<br>C:T | 0.000368 |
| 86_c3-1 | 86 | EGFR                        | MODIFIER; MODERATE | c.*1464C><br>A;<br>c.1621C>A                                                                  | ; p.Leu541Ile                                            | 1 | FALSE | chr7:5522<br>9314:C:A  | 113:chr7:5<br>5229314:C<br>:A  | 0.000416 |
| 86_c3-1 | 86 | ESR1                        | MODERATE           | c.932C>T;<br>c.935C>T;<br>c.941C>T                                                            | p.Ala311Val;<br>p.Ala312Val;<br>p.Ala314Val              | 0 | FALSE | chr6:1522<br>65482:C:T | 113:chr6:1<br>52265482:<br>C:T | 0.000615 |
| 86_c3-1 | 86 | FGFR4                       | MODIFIER; MODERATE | c.1058-<br>174G>A;<br>c.1078G>A                                                               | ; p.Ala360Thr                                            | 1 | FALSE | chr5:1765<br>20159:G:A | 113:chr5:1<br>76520159:<br>G:A | 0.000759 |
| 86_c3-1 | 86 | FGFR3                       | MODERATE           | c.1526G>A<br>;<br>c.1862G>A<br>;<br>c.1868G>A                                                 | p.Arg509His<br>;<br>p.Arg621His<br>;<br>p.Arg623His      | 2 | FALSE | chr4:1807<br>803:G:A   | 113:chr4:1<br>807803:G:<br>A   | 0.000868 |
| 86_c3-1 | 86 | NTRK3                       | MODERATE           | c.995C>T                                                                                      | p.Thr332Met                                              | 0 | FALSE | chr15:886<br>78541:G:A | 113:chr15:<br>88678541:<br>G:A | 0.000356 |
| 86_c3-1 | 86 | FBXW7                       | MODERATE           | c.1183A>G<br>;<br>c.1297A>G<br>;<br>c.1537A>G                                                 | p.Arg395Gly<br>;<br>p.Arg433Gly<br>;<br>p.Arg513Gly      | 0 | FALSE | chr4:1532<br>47265:T:C | 113:chr4:1<br>53247265:<br>T:C | 0.001693 |
| 86_c3-1 | 86 | PKD1;<br>TSC2               | MODIFIER; MODERATE | c.*13118C<br>>T;<br>c.*13121C<br>>T;<br>c.4192G>A<br>;<br>c.4324G>A<br>;<br>c.4393G>A         | p.Asp1398Asn;<br>p.Asp1442Asn;<br>p.Asp1465Asn           | 0 | FALSE | chr16:213<br>4616:G:A  | 113:chr16:<br>2134616:G<br>:A  | 0.000306 |
| 86_c3-1 | 86 | KIT                         | MODERATE           | c.682G>A                                                                                      | p.Glu228Lys                                              | 1 | FALSE | chr4:5556<br>5858:G:A  | 113:chr4:5<br>5565858:G<br>:A  | 0.000585 |

|         |    |                    |                    |                                                           |                                               |    |       |                        |                                |          |
|---------|----|--------------------|--------------------|-----------------------------------------------------------|-----------------------------------------------|----|-------|------------------------|--------------------------------|----------|
| 86_c3-1 | 86 | CWH43              | MODERATE           | c.1535G>A<br>;<br>c.1616G>A                               | p.Gly512Asp<br>;<br>p.Gly539Asp               | 0  | FALSE | chr4:4903<br>4690:G:A  | 113:chr4:4<br>9034690:G<br>:A  | 0.000553 |
| 86_c3-1 | 86 | NRAS               | MODERATE           | c.490C>T                                                  | p.Arg164Cys                                   | 1  | FALSE | chr1:1152<br>51236:G:A | 113:chr1:1<br>15251236:<br>G:A | 0.000395 |
| 86_c3-1 | 86 | C9orf53;<br>CDKN2A | MODIFIER; MODERATE | n.*616C>T<br>;<br>c.*176G>A<br>;<br>c.253G>A;<br>c.296G>A | p.Ala85Thr;<br>p.Arg99His                     | 1  | FALSE | chr9:2197<br>1105:C:T  | 113:chr9:2<br>1971105:C<br>:T  | 0.000463 |
| 86_c3-1 | 86 | EGFR               | MODERATE           | c.185T>C                                                  | p.Leu62Pro                                    | 7  | FALSE | chr7:5521<br>0075:T:C  | 113:chr7:5<br>5210075:T<br>:C  | 0.000395 |
| 86_c3-1 | 86 | ALK                | MODERATE           | c.1316G>T                                                 | p.Ser439Ile                                   | 1  | FALSE | chr2:2955<br>1314:C:A  | 113:chr2:2<br>9551314:C<br>:A  | 0.000323 |
| 86_c3-1 | 86 | NOTCH1             | MODERATE           | c.4571C>T                                                 | p.Ala1524Val                                  | 0  | FALSE | chr9:1393<br>99777:G:A | 113:chr9:1<br>39399777:<br>G:A | 0.000987 |
| 86_c3-1 | 86 | CDH1               | MODERATE           | c.1058A>G                                                 | p.Glu353Gly                                   | 0  | FALSE | chr16:688<br>46087:A:G | 113:chr16:<br>68846087:<br>A:G | 0.000808 |
| 86_c3-1 | 86 | AR                 | MODERATE           | c.2131A>G<br>;<br>c.535A>G                                | p.Arg711Gly<br>;<br>p.Arg179Gly               | 0  | FALSE | chrX:6693<br>1489:A:G  | 113:chrX:6<br>6931489:A<br>:G  | 0.00037  |
| 86_c3-1 | 86 | RET                | MODERATE           | c.2038G>A                                                 | p.Ala680Thr                                   | 1  | FALSE | chr10:436<br>10086:G:A | 113:chr10:<br>43610086:<br>G:A | 0.00043  |
| 86_c3-1 | 86 | HOXD-AS2;<br>HOXD8 | MODIFIER; HIGH     | n.*692G>A<br>;<br>c.-99C>T;<br>c.454C>T                   | p.Gln152*                                     | 0  | FALSE | chr2:1769<br>95548:C:T | 113:chr2:1<br>76995548:<br>C:T | 0.000407 |
| 86_c3-1 | 86 | TP53               | MODIFIER; MODERATE | c.-57T>C;<br>c.25T>C;<br>c.304T>C;<br>c.421T>C            | p.Cys9Arg;<br>p.Cys102Arg<br>;<br>p.Cys141Arg | 23 | FALSE | chr17:757<br>8509:A:G  | 113:chr17:<br>7578509:A<br>:G  | 0.000371 |
| 86_c3-1 | 86 | NOTCH1             | MODERATE           | c.5885G>A                                                 | p.Arg1962His                                  | 0  | FALSE | chr9:1393<br>95053:C:T | 113:chr9:1<br>39395053:<br>C:T | 0.000785 |
| 86_c3-1 | 86 | FGFR3              | MODIFIER; MODERATE | c.931-<br>308G>A;<br>;<br>c.1262G>A<br>;<br>c.1268G>A     | p.Arg421Gln<br>;<br>p.Arg423Gln               | 1  | FALSE | chr4:1806<br>243:G:A   | 113:chr4:1<br>806243:G:<br>A   | 0.000401 |
| 86_c3-1 | 86 | KIT                | MODERATE           | c.25G>A                                                   | p.Asp9Asn                                     | 1  | FALSE | chr4:5552<br>4206:G:A  | 113:chr4:5<br>5524206:G<br>:A  | 0.000368 |

|         |    |                             |                    |                                                                                                   |                                                               |    |       |                        |                                |          |
|---------|----|-----------------------------|--------------------|---------------------------------------------------------------------------------------------------|---------------------------------------------------------------|----|-------|------------------------|--------------------------------|----------|
| 86_c3-1 | 86 | ERBB2;<br>MIEN1;<br>MIR4728 | MODERATE; MODIFIER | c.2720A>G<br>;<br>c.2765A>G<br>;<br>c.2810A>G<br>;<br>n.3134A>G<br>;<br>c.*388T>C;<br>n.-1A>G     | p.Lys907Arg<br>;<br>p.Lys922Arg<br>;<br>p.Lys937Arg<br>;      | 1  | FALSE | chr17:378<br>82044:A:G | 113:chr17:<br>37882044:<br>A:G | 0.000565 |
| 86_c3-1 | 86 | KIT                         | MODERATE           | c.1835C>T;<br>c.1847C>T                                                                           | p.Ala612Val;<br>p.Ala616Val                                   | 1  | FALSE | chr4:5559<br>4061:C:T  | 113:chr4:5<br>5594061:C<br>:T  | 0.000519 |
| 86_c3-1 | 86 | NF1                         | MODERATE           | c.5582G>A<br>;<br>c.5645G>A                                                                       | p.Cys1861Ty<br>r;<br>p.Cys1882Ty<br>r                         | 1  | FALSE | chr17:296<br>57349:G:A | 113:chr17:<br>29657349:<br>G:A | 0.000597 |
| 86_c3-1 | 86 | TP53                        | MODERATE           | c.127C>T;<br>c.406C>T;<br>c.46C>T;<br>c.523C>T                                                    | p.Arg43Cys;<br>p.Arg136Cys<br>;<br>p.Arg16Cys;<br>p.Arg175Cys | 20 | FALSE | chr17:757<br>8407:G:A  | 113:chr17:<br>7578407:G<br>:A  | 0.000325 |
| 86_c3-1 | 86 | FLT3                        | MODERATE           | c.2039C>T                                                                                         | p.Ala680Val                                                   | 0  | FALSE | chr13:286<br>02329:G:A | 113:chr13:<br>28602329:<br>G:A | 0.000584 |
| 86_c3-1 | 86 | NF1                         | MODERATE           | c.2695T>G                                                                                         | p.Leu899Val                                                   | 3  | FALSE | chr17:295<br>56328:T:G | 113:chr17:<br>29556328:<br>T:G | 0.003988 |
| 86_c3-1 | 86 | TP53                        | MODIFIER; MODERATE | c.-11C>T;<br>c.-92C>T;<br>c.269C>T;<br>c.386C>T                                                   | ; p.Ala90Val;<br>p.Ala129Val                                  | 2  | FALSE | chr17:757<br>8544:G:A  | 113:chr17:<br>7578544:G<br>:A  | 0.000352 |
| 86_c3-1 | 86 | NF1                         | MODERATE           | c.2659G>A                                                                                         | p.Ala887Thr                                                   | 1  | FALSE | chr17:295<br>56292:G:A | 113:chr17:<br>29556292:<br>G:A | 0.000678 |
| 86_c3-1 | 86 | VHL                         | MODIFIER; MODERATE | c.341-<br>3226G>A;<br>c.388G>A                                                                    | ; p.Val130Ile                                                 | 0  | FALSE | chr3:1018<br>8245:G:A  | 113:chr3:1<br>0188245:G<br>:A  | 0.000367 |
| 86_c3-1 | 86 | GAPDH;<br>IFFO1             | MODERATE; MODIFIER | c.773G>A;<br>c.899G>A;<br>c.*1743C><br>T;<br>c.*1746C><br>T;<br>c.*1770C><br>T;<br>n.*2798C><br>T | p.Gly258Asp<br>;<br>p.Gly300Asp<br>;                          | 0  | FALSE | chr12:664<br>7123:G:A  | 113:chr12:<br>6647123:G<br>:A  | 0.000319 |
| 86_c3-1 | 86 | PTEN                        | MODERATE           | c.698G>A                                                                                          | p.Arg233Gln                                                   | 2  | FALSE | chr10:897<br>17673:G:A | 113:chr10:<br>89717673:<br>G:A | 0.0004   |

|         |    |        |                    |                                                   |                                                                         |     |       |                        |                                |          |
|---------|----|--------|--------------------|---------------------------------------------------|-------------------------------------------------------------------------|-----|-------|------------------------|--------------------------------|----------|
| 86_c3-1 | 86 | EPHA3  | MODERATE           | c.1535G>A                                         | p.Arg512Gln                                                             | 0   | FALSE | chr3:8944<br>8571:G:A  | 113:chr3:8<br>9448571:G<br>:A  | 0.000499 |
| 86_c3-1 | 86 | TSC2   | MODERATE           | c.2807G>A                                         | p.Arg936Gln                                                             | 0   | FALSE | chr16:212<br>6556:G:A  | 113:chr16:<br>2126556:G<br>:A  | 0.000576 |
| 86_c3-1 | 86 | ALK    | MODERATE           | c.4192C>T                                         | p.Pro1398Ser                                                            | 1   | FALSE | chr2:2941<br>6761:G:A  | 113:chr2:2<br>9416761:G<br>:A  | 0.000603 |
| 86_c3-1 | 86 | SMO    | MODERATE           | c.983G>A                                          | p.Gly328Asp                                                             | 0   | FALSE | chr7:1288<br>46053:G:A | 113:chr7:1<br>28846053:<br>G:A | 0.000269 |
| 86_c3-1 | 86 | PHLPP1 | MODERATE           | c.2197G>A                                         | p.Val733Ile                                                             | 0   | FALSE | chr18:605<br>62374:G:A | 113:chr18:<br>60562374:<br>G:A | 0.000416 |
| 86_c3-1 | 86 | NTRK1  | MODERATE           | c.835C>T;<br>c.925C>T                             | p.Pro279Ser<br>;<br>p.Pro309Ser                                         | 1   | FALSE | chr1:1568<br>43499:C:T | 113:chr1:1<br>56843499:<br>C:T | 0.000364 |
| 86_c3-1 | 86 | TSC2   | MODERATE           | c.2513G>A                                         | p.Ser838Asn                                                             | 0   | FALSE | chr16:212<br>4358:G:A  | 113:chr16:<br>2124358:G<br>:A  | 0.000531 |
| 86_c3-1 | 86 | ERBB2  | MODERATE; MODIFIER | c.839C>T;<br>c.884C>T;<br>c.929C>T;<br>n.1253C>T  | p.Ser280Phe<br>;<br>p.Ser295Phe<br>;<br>p.Ser310Phe<br>;                | 28  | FALSE | chr17:378<br>68208:C:T | 113:chr17:<br>37868208:<br>C:T | 0.008383 |
| 86_c3-1 | 86 | PIK3CA | MODERATE           | c.277C>T                                          | p.Arg93Trp                                                              | 24  | FALSE | chr3:1789<br>16890:C:T | 113:chr3:1<br>78916890:<br>C:T | 0.000348 |
| 86_c3-1 | 86 | KDR    | HIGH               | c.3064C>T                                         | p.Arg1022*                                                              | 3   | FALSE | chr4:5595<br>8789:G:A  | 113:chr4:5<br>5958789:G<br>:A  | 0.000359 |
| 86_c3-1 | 86 | TP53   | MODERATE           | c.340C>T;<br>c.421C>T;<br>c.700C>T;<br>c.817C>T   | p.Arg114Cys<br>;<br>p.Arg141Cys<br>;<br>p.Arg234Cys<br>;<br>p.Arg273Cys | 601 | FALSE | chr17:757<br>7121:G:A  | 113:chr17:<br>7577121:G<br>:A  | 0.000704 |
| 86_c3-1 | 86 | ALK    | MODERATE           | c.874C>T                                          | p.Arg292Cys                                                             | 1   | FALSE | chr2:2991<br>7794:G:A  | 113:chr2:2<br>9917794:G<br>:A  | 0.000478 |
| 86_c3-1 | 86 | NTRK1  | MODERATE           | c.415G>A;<br>c.505G>A                             | p.Gly139Arg<br>;<br>p.Gly169Arg                                         | 1   | FALSE | chr1:1568<br>37972:G:A | 113:chr1:1<br>56837972:<br>G:A | 0.000488 |
| 86_c3-1 | 86 | TP53   | MODERATE; MODIFIER | c.179C>T;<br>c.296C>T;<br>c.-279C>T;<br>c.-360C>T | p.Ser60Phe;<br>p.Ser99Phe;                                              | 3   | FALSE | chr17:757<br>9391:G:A  | 113:chr17:<br>7579391:G<br>:A  | 0.000466 |

|         |    |                                 |                    |                                                                                                                           |                                                                                                                             |    |       |                     |                         |          |
|---------|----|---------------------------------|--------------------|---------------------------------------------------------------------------------------------------------------------------|-----------------------------------------------------------------------------------------------------------------------------|----|-------|---------------------|-------------------------|----------|
| 86_c3-1 | 86 | TP53                            | MODERATE           | c.109A>G;<br>c.28A>G;<br>c.388A>G;<br>c.505A>G                                                                            | p.Met37Val;<br>p.Met10Val;<br>p.Met130Val;<br>p.Met169Val                                                                   | 3  | FALSE | chr17:7578425:T:C   | 113:chr17:7578425:T:C   | 0.000333 |
| 86_c3-1 | 86 | FOXL2;<br>FOXL2NB;<br>LINC01391 | MODERATE; MODIFIER | c.282T>A;<br>c.-132A>T;<br>n.-1T>A                                                                                        | p.Asn94Lys;                                                                                                                 | 0  | FALSE | chr3:138665283:A:T  | 113:chr3:138665283:A:T  | 0.012394 |
| 86_c3-1 | 86 | PTEN                            | MODERATE           | c.914G>A                                                                                                                  | p.Ser305Asn                                                                                                                 | 1  | FALSE | chr10:89720763:G:A  | 113:chr10:89720763:G:A  | 0.000545 |
| 86_c3-1 | 86 | TSC2                            | MODERATE           | c.1099C>T                                                                                                                 | p.Arg367Trp                                                                                                                 | 0  | FALSE | chr16:2110794:C:T   | 113:chr16:2110794:C:T   | 0.000423 |
| 86_c3-1 | 86 | ATM                             | HIGH               | c.2413C>T                                                                                                                 | p.Arg805*                                                                                                                   | 0  | FALSE | chr11:108129749:C:T | 113:chr11:108129749:C:T | 0.000369 |
| 86_c3-1 | 86 | PIK3CA                          | HIGH               | c.3152G>A                                                                                                                 | p.Trp1051*                                                                                                                  | 3  | FALSE | chr3:178952097:G:A  | 113:chr3:178952097:G:A  | 0.000343 |
| 86_c3-1 | 86 | FBXW7                           | MODERATE           | c.1082G>A;<br>c.1196G>A;<br>c.1436G>A                                                                                     | p.Arg361Gln;<br>p.Arg399Gln;<br>p.Arg479Gln                                                                                 | 0  | FALSE | chr4:153247366:C:T  | 113:chr4:153247366:C:T  | 0.000304 |
| 86_c3-1 | 86 | FGFR2                           | MODERATE; MODIFIER | c.1073A>G;<br>c.1076A>G;<br>c.1079A>G;<br>c.1088A>G;<br>c.1157A>G;<br>c.1160A>G;<br>c.1424A>G;<br>c.1427A>G;<br>n.1874A>G | p.Glu358Gly;<br>p.Glu359Gly;<br>p.Glu360Gly;<br>p.Glu363Gly;<br>p.Glu386Gly;<br>p.Glu387Gly;<br>p.Glu475Gly;<br>p.Glu476Gly | 2  | FALSE | chr10:123263319:T:C | 113:chr10:123263319:T:C | 0.000668 |
| 86_c3-1 | 86 | CTNNB1                          | MODERATE           | c.1564G>A                                                                                                                 | p.Ala522Thr                                                                                                                 | 0  | FALSE | chr3:41275669:G:A   | 113:chr3:41275669:G:A   | 0.000591 |
| 86_c3-1 | 86 | MET                             | MODERATE           | c.1132G>A                                                                                                                 | p.Val378Ile                                                                                                                 | 1  | FALSE | chr7:116340270:G:A  | 113:chr7:116340270:G:A  | 0.000518 |
| 86_c3-1 | 86 | PIK3CA                          | MODERATE           | c.2176G>A                                                                                                                 | p.Glu726Lys                                                                                                                 | 26 | FALSE | chr3:178938934:G:A  | 113:chr3:178938934:G:A  | 0.005826 |
| 86_c3-1 | 86 | APC                             | MODERATE           | c.941G>A;<br>c.995G>A                                                                                                     | p.Arg314Gln;<br>p.Arg332Gln                                                                                                 | 0  | FALSE | chr5:112154724:G:A  | 113:chr5:112154724:G:A  | 0.000594 |

|         |    |                   |                    |                                                                       |                                                             |     |       |                    |                        |          |
|---------|----|-------------------|--------------------|-----------------------------------------------------------------------|-------------------------------------------------------------|-----|-------|--------------------|------------------------|----------|
| 86_c3-1 | 86 | PIK3CA            | MODERATE           | c.3034G>A                                                             | p.Glu1012Lys                                                | 2   | FALSE | chr3:178951979:G:A | 113:chr3:178951979:G:A | 0.000328 |
| 86_c3-1 | 86 | PKD1;<br>TSC2     | MODIFIER; MODERATE | c.*13118C>T;<br>c.*13121C>T;<br>c.4280G>A;<br>c.4412G>A;<br>c.4481G>A | p.Gly1427Asp;<br>p.Gly1471Asp;<br>p.Gly1494Asp              | 0   | FALSE | chr16:2134704:G:A  | 113:chr16:2134704:G:A  | 0.000474 |
| 86_c3-1 | 86 | EGFR;<br>EGFR-AS1 | MODERATE; MODIFIER | c.2390G>A;<br>n.1172C>T                                               | p.Cys797Tyr                                                 | 3   | FALSE | chr7:55249092:G:A  | 113:chr7:55249092:G:A  | 0.000353 |
| 86_c3-1 | 86 | EGFR              | MODERATE           | c.967G>A                                                              | p.Val323Ile                                                 | 2   | FALSE | chr7:55223600:G:A  | 113:chr7:55223600:G:A  | 0.000394 |
| 86_c3-1 | 86 | KIT               | MODERATE           | c.2854C>T;<br>c.2866C>T                                               | p.Arg952Trp;<br>p.Arg956Trp                                 | 3   | FALSE | chr4:55604658:C:T  | 113:chr4:55604658:C:T  | 0.000694 |
| 86_c3-1 | 86 | ALK               | MODERATE           | c.1753G>A                                                             | p.Ala585Thr                                                 | 3   | FALSE | chr2:29519818:C:T  | 113:chr2:29519818:C:T  | 0.000319 |
| 86_c3-1 | 86 | PIK3R1            | MODERATE           | c.1168T>C;<br>c.1258T>C;<br>c.2068T>C;<br>c.979T>C                    | p.Ser390Pro;<br>p.Ser420Pro;<br>p.Ser690Pro;<br>p.Ser327Pro | 2   | FALSE | chr5:67593322:T:C  | 113:chr5:67593322:T:C  | 0.000598 |
| 86_c3-1 | 86 | TSC1              | MODERATE           | c.1823C>T;<br>c.1973C>T;<br>c.1976C>T                                 | p.Ala608Val;<br>p.Ala658Val;<br>p.Ala659Val                 | 0   | FALSE | chr9:135780989:G:A | 113:chr9:135780989:G:A | 0.000505 |
| 86_c3-1 | 86 | TP53              | MODERATE           | c.266G>A;<br>c.347G>A;<br>c.626G>A;<br>c.743G>A                       | p.Arg89Gln;<br>p.Arg116Gln;<br>p.Arg209Gln;<br>p.Arg248Gln  | 673 | FALSE | chr17:7577538:C:T  | 113:chr17:7577538:C:T  | 0.000558 |
| 86_c3-1 | 86 | TP53              | MODERATE; MODIFIER | c.140C>T;<br>c.23C>T; c.-279C>T; c.-360C>T                            | p.Pro47Leu;<br>p.Pro8Leu;                                   | 2   | FALSE | chr17:7579547:G:A  | 113:chr17:7579547:G:A  | 0.000407 |
| 86_c3-1 | 86 | PIK3CA            | MODERATE           | c.1625A>G                                                             | p.Glu542Gly                                                 | 14  | FALSE | chr3:178936083:A:G | 113:chr3:178936083:A:G | 0.000399 |

|         |    |                             |                    |                                                                                                |                                                                                                                 |   |       |                        |                                |          |
|---------|----|-----------------------------|--------------------|------------------------------------------------------------------------------------------------|-----------------------------------------------------------------------------------------------------------------|---|-------|------------------------|--------------------------------|----------|
| 86_c3-1 | 86 | TP53                        | MODERATE           | c.242G>T;<br>c.323G>T;<br>c.602G>T;<br>c.719G>T                                                | p.Ser81Ile;<br>p.Ser108Ile;<br>p.Ser201Ile;<br>p.Ser240Ile                                                      | 6 | FALSE | chr17:757<br>7562:C:A  | 113:chr17:<br>7577562:C<br>:A  | 0.000372 |
| 86_c3-1 | 86 | ERBB2;<br>MIEN1;<br>MIR4728 | MODERATE; MODIFIER | c.2239G>C<br>;<br>c.2284G>C<br>;<br>c.2329G>C<br>;<br>n.2653G>C<br>;<br>c.*388C>G<br>; n.-1G>C | p.Val747Leu<br>;<br>p.Val762Leu<br>;<br>p.Val777Leu<br>;                                                        | 9 | FALSE | chr17:378<br>81000:G:C | 113:chr17:<br>37881000:<br>G:C | 0.030645 |
| 86_c3-1 | 86 | TP53                        | MODERATE           | c.365C>T;<br>c.482C>T;<br>c.5C>T;<br>c.86C>T                                                   | p.Ala122Val;<br>p.Ala161Val;<br>p.Ala2Val;<br>p.Ala29Val                                                        | 9 | FALSE | chr17:757<br>8448:G:A  | 113:chr17:<br>7578448:G<br>:A  | 0.000359 |
| 86_c3-1 | 86 | NOTCH1                      | MODERATE           | c.3374C>T                                                                                      | p.Ala1125Val                                                                                                    | 0 | FALSE | chr9:1394<br>02543:G:A | 113:chr9:1<br>39402543:<br>G:A | 0.000548 |
| 86_c3-1 | 86 | FGFR1                       | MODERATE           | c.476G>A;<br>c.482G>A;<br>c.725G>A;<br>c.743G>A;<br>c.749G>A;<br>c.842G>A                      | p.Arg159Gln<br>;<br>p.Arg161Gln<br>;<br>p.Arg242Gln<br>;<br>p.Arg248Gln<br>;<br>p.Arg250Gln<br>;<br>p.Arg281Gln | 1 | FALSE | chr8:3828<br>2214:C:T  | 113:chr8:3<br>8282214:C<br>:T  | 0.000184 |
| 86_c3-1 | 86 | TSC2                        | MODIFIER; MODERATE | c.2837+11<br>08G>A;<br>c.2933G>A                                                               | p.Arg978His                                                                                                     | 0 | FALSE | chr16:212<br>7694:G:A  | 113:chr16:<br>2127694:G<br>:A  | 0.000378 |
| 86_c3-1 | 86 | CDH1                        | MODERATE           | c.856G>A                                                                                       | p.Ala286Thr                                                                                                     | 0 | FALSE | chr16:688<br>45610:G:A | 113:chr16:<br>68845610:<br>G:A | 0.000442 |
| 86_c3-1 | 86 | HGF                         | MODERATE           | c.767G>A;<br>c.782G>A                                                                          | p.Arg256His<br>;<br>p.Arg261His                                                                                 | 0 | FALSE | chr7:8137<br>2752:C:T  | 113:chr7:8<br>1372752:C<br>:T  | 0.000736 |
| 86_c3-1 | 86 | PTEN                        | MODERATE           | c.133G>A                                                                                       | p.Val45Ile                                                                                                      | 1 | FALSE | chr10:896<br>53835:G:A | 113:chr10:<br>89653835:<br>G:A | 0.00078  |



|         |    |                    |                            |                                                                                               |                                                                         |    |       |                             |                                 |          |
|---------|----|--------------------|----------------------------|-----------------------------------------------------------------------------------------------|-------------------------------------------------------------------------|----|-------|-----------------------------|---------------------------------|----------|
| 86_c3-1 | 86 | TP53               | MODIFIER; MODERATE         | c.*137A>G<br>;<br>c.*225A>G<br>;<br>c.1001A>G<br>;<br>c.1118A>G<br>;<br>c.641A>G;<br>c.722A>G | p.Lys334Arg<br>;<br>p.Lys373Arg<br>;<br>p.Lys214Arg<br>;<br>p.Lys241Arg | 1  | FALSE | chr17:757<br>2991:T:C       | 113:chr17:<br>7572991:T<br>:C   | 0.001469 |
| 86_c3-1 | 86 | ALK                | MODERATE                   | c.4409C>T                                                                                     | p.Ala1470Val                                                            | 1  | FALSE | chr2:2941<br>6544:G:A       | 113:chr2:2<br>9416544:G<br>:A   | 0.00029  |
| 86_c3-1 | 86 | CDH1               | HIGH                       | c.1913G>A                                                                                     | p.Trp638*                                                               | 0  | FALSE | chr16:688<br>56105:G:A      | 113:chr16:<br>68856105:<br>G:A  | 0.000311 |
| 86_c3-1 | 86 | NTRK3              | MODERATE                   | c.581G>A                                                                                      | p.Gly194Asp                                                             | 0  | FALSE | chr15:886<br>80676:C:T      | 113:chr15:<br>88680676:<br>C:T  | 0.000343 |
| 86_c3-1 | 86 | FLT3               | MODERATE                   | c.1879G>A                                                                                     | p.Ala627Thr                                                             | 0  | FALSE | chr13:286<br>08087:C:T      | 113:chr13:<br>28608087:<br>C:T  | 0.000407 |
| 86_c3-1 | 86 | ATM                | MODERATE                   | c.3925G>A                                                                                     | p.Ala1309Thr                                                            | 0  | FALSE | chr11:108<br>155132:G:<br>A | 113:chr11:<br>10815513<br>2:G:A | 0.000395 |
| 86_c3-1 | 86 | NTRK2              | MODERATE                   | c.1628A>G<br>;<br>c.1676A>G                                                                   | p.Glu543Gly<br>;<br>p.Glu559Gly                                         | 0  | FALSE | chr9:8754<br>9119:A:G       | 113:chr9:8<br>7549119:A<br>:G   | 0.000584 |
| 86_c3-1 | 86 | TP53               | MODIFIER; HIGH             | c.-48C>T;<br>c.313C>T;<br>c.34C>T;<br>c.430C>T                                                | p.Gln105*;<br>p.Gln12*;<br>p.Gln144*                                    | 42 | FALSE | chr17:757<br>8500:G:A       | 113:chr17:<br>7578500:G<br>:A   | 0.000722 |
| 86_c3-1 | 86 | C9orf53;<br>CDKN2A | MODIFIER; MODERATE;<br>LOW | n.*616G>A<br>;<br>c.*180C>T;<br>c.257C>T;<br>c.300C>T                                         | p.Ala86Val;<br>p.Cys100Cys                                              | 1  | FALSE | chr9:2197<br>1101:G:A       | 113:chr9:2<br>1971101:G<br>:A   | 0.000449 |
| 86_c3-1 | 86 | CDH1               | MODERATE                   | c.1207G>A                                                                                     | p.Ala403Thr                                                             | 0  | FALSE | chr16:688<br>47285:G:A      | 113:chr16:<br>68847285:<br>G:A  | 0.0004   |
| 86_c3-1 | 86 | ERBB2;<br>MIR4728  | MODERATE; LOW;<br>MODIFIER | c.2215G>C<br>;<br>c.2260G>C<br>;<br>c.2305G>C<br>;<br>n.2629G>C<br>; n.-1G>C                  | p.Asp739His<br>;<br>p.Asp754His<br>;<br>p.Asp769His                     | 5  | FALSE | chr17:378<br>80261:G:C      | 113:chr17:<br>37880261:<br>G:C  | 0.249795 |
| 86_c3-1 | 86 | PIK3CA             | MODERATE                   | c.3154A>G                                                                                     | p.Thr1052Ala                                                            | 3  | FALSE | chr3:1789<br>52099:A:G      | 113:chr3:1<br>78952099:<br>A:G  | 0.000347 |
| 86_c3-1 | 86 | RET                | MODERATE                   | c.1867G>A                                                                                     | p.Glu623Lys                                                             | 1  | FALSE | chr10:436<br>09111:G:A      | 113:chr10:<br>43609111:<br>G:A  | 0.000779 |

|         |    |        |          |                                                      |                                                                         |    |       |                        |                                |          |
|---------|----|--------|----------|------------------------------------------------------|-------------------------------------------------------------------------|----|-------|------------------------|--------------------------------|----------|
| 86_c3-1 | 86 | NTRK2  | MODERATE | c.2216T>C;<br>c.2264T>C                              | p.Leu739Pro<br>; p.Leu755Pro                                            | 0  | FALSE | chr9:8763<br>5212:T:C  | 113:chr9:8<br>7635212:T<br>:C  | 0.000562 |
| 86_c3-1 | 86 | TP53   | MODERATE | c.170C>T;<br>c.449C>T;<br>c.566C>T;<br>c.89C>T       | p.Ala57Val;<br>p.Ala150Val;<br>p.Ala189Val;<br>p.Ala30Val               | 4  | FALSE | chr17:757<br>8283:G:A  | 113:chr17:<br>7578283:G<br>:A  | 0.000485 |
| 86_c3-1 | 86 | CDH1   | MODERATE | c.1423G>A                                            | p.Val475Me<br>t                                                         | 0  | FALSE | chr16:688<br>49520:G:A | 113:chr16:<br>68849520:<br>G:A | 0.000329 |
| 86_c3-1 | 86 | ALK    | MODERATE | c.562C>T                                             | p.Arg188Cys                                                             | 2  | FALSE | chr2:3014<br>2964:G:A  | 113:chr2:3<br>0142964:G<br>:A  | 0.00037  |
| 86_c3-1 | 86 | PIK3R1 | MODERATE | c.1715A>G<br>;<br>c.626A>G;<br>c.815A>G;<br>c.905A>G | p.Gln572Arg<br>;<br>p.Gln209Arg<br>;<br>p.Gln272Arg<br>;<br>p.Gln302Arg | 1  | FALSE | chr5:6759<br>1122:A:G  | 113:chr5:6<br>7591122:A<br>:G  | 0.000366 |
| 86_c3-1 | 86 | KIT    | MODERATE | c.2197G>A<br>;<br>c.2209G>A                          | p.Asp733As<br>n;<br>p.Asp737As<br>n                                     | 2  | FALSE | chr4:5559<br>7561:G:A  | 113:chr4:5<br>5597561:G<br>:A  | 0.000362 |
| 86_c3-1 | 86 | NTRK3  | MODERATE | c.1463C>T;<br>c.1487C>T                              | p.Ala488Val;<br>p.Ala496Val                                             | 0  | FALSE | chr15:885<br>76186:G:A | 113:chr15:<br>88576186:<br>G:A | 0.000423 |
| 86_c3-1 | 86 | PIK3CA | MODERATE | c.3077T>C                                            | p.Leu1026Pr<br>o                                                        | 1  | FALSE | chr3:1789<br>52022:T:C | 113:chr3:1<br>78952022:<br>T:C | 0.000331 |
| 86_c3-1 | 86 | TSC2   | MODERATE | c.1136A>G                                            | p.Glu379Gly                                                             | 0  | FALSE | chr16:211<br>1888:A:G  | 113:chr16:<br>2111888:A<br>:G  | 0.001447 |
| 86_c3-1 | 86 | DDR2   | MODERATE | c.2516G>A                                            | p.Arg839His                                                             | 3  | FALSE | chr1:1627<br>49984:G:A | 113:chr1:1<br>62749984:<br>G:A | 0.000333 |
| 86_c3-1 | 86 | TSC1   | MODERATE | c.1547C>T;<br>c.1697C>T;<br>c.1700C>T                | p.Ala516Val;<br>p.Ala566Val;<br>p.Ala567Val                             | 0  | FALSE | chr9:1357<br>81265:G:A | 113:chr9:1<br>35781265:<br>G:A | 0.001084 |
| 86_c3-1 | 86 | RET    | MODERATE | c.2221G>A                                            | p.Ala741Thr                                                             | 1  | FALSE | chr10:436<br>12116:G:A | 113:chr10:<br>43612116:<br>G:A | 0.000562 |
| 86_c3-1 | 86 | TSC2   | MODERATE | c.3410C>T;<br>c.3542C>T                              | p.Thr1137M<br>et;<br>p.Thr1181M<br>et                                   | 0  | FALSE | chr16:213<br>0310:C:T  | 113:chr16:<br>2130310:C<br>:T  | 0.000499 |
| 86_c3-1 | 86 | PIK3CA | MODERATE | c.1616C>G                                            | p.Pro539Arg                                                             | 19 | FALSE | chr3:1789<br>36074:C:G | 113:chr3:1<br>78936074:<br>C:G | 0.000627 |

|         |    |                            |                            |                                                                                                                      |                                                                         |     |       |                        |                                |          |
|---------|----|----------------------------|----------------------------|----------------------------------------------------------------------------------------------------------------------|-------------------------------------------------------------------------|-----|-------|------------------------|--------------------------------|----------|
| 86_c3-1 | 86 | GAPDH;<br>IFFO1;<br>NCAPD2 | MODERATE; MODIFIER         | c.16G>A; c.<br>349G>A;<br>c.*1743C><br>T;<br>c.*1746C><br>T;<br>c.*1770C><br>T;<br>n.*2798C><br>T;<br>c.*4252G><br>A | p.Val6Ile;                                                              | 0   | FALSE | chr12:664<br>4014:G:A  | 113:chr12:<br>6644014:G<br>:A  | 0.000641 |
| 86_c3-1 | 86 | KIT                        | MODERATE                   | c.365G>A                                                                                                             | p.Arg122His                                                             | 1   | FALSE | chr4:5556<br>4477:G:A  | 113:chr4:5<br>5564477:G<br>:A  | 0.000391 |
| 86_c3-1 | 86 | KIT                        | MODERATE                   | c.287C>T                                                                                                             | p.Thr96Met                                                              | 1   | FALSE | chr4:5556<br>1897:C:T  | 113:chr4:5<br>5561897:C<br>:T  | 0.0005   |
| 86_c3-1 | 86 | NOTCH1                     | MODERATE                   | c.2734C>T                                                                                                            | p.Arg912Trp                                                             | 0   | FALSE | chr9:1394<br>05111:G:A | 113:chr9:1<br>39405111:<br>G:A | 0.000598 |
| 86_c3-1 | 86 | EGFR;<br>EGFR-AS1          | MODERATE; MODIFIER         | c.2330T>C;<br>n.1232A>G                                                                                              | p.Leu777Pro<br>;                                                        | 2   | FALSE | chr7:5524<br>9032:T:C  | 113:chr7:5<br>5249032:T<br>:C  | 0.000672 |
| 86_c3-1 | 86 | C9orf53;<br>CDKN2A         | MODIFIER; MODERATE;<br>LOW | n.*616C>T<br>;<br>c.*278G>A<br>;<br>c.355G>A;<br>c.398G>A                                                            | p.Glu119Lys<br>;<br>p.Ter133Ter                                         | 4   | FALSE | chr9:2197<br>1003:C:T  | 113:chr9:2<br>1971003:C<br>:T  | 0.000442 |
| 86_c3-1 | 86 | EGFR                       | MODIFIER; MODERATE         | c.*2364G><br>A;<br>c.2092G>A                                                                                         | p.Ala698Thr                                                             | 2   | FALSE | chr7:5524<br>1644:G:A  | 113:chr7:5<br>5241644:G<br>:A  | 0.000372 |
| 86_c3-1 | 86 | NTRK3                      | HIGH                       | c.1348C>T;<br>c.1372C>T                                                                                              | p.Arg450*;<br>p.Arg458*                                                 | 0   | FALSE | chr15:886<br>69526:G:A | 113:chr15:<br>88669526:<br>G:A | 0.000347 |
| 86_c3-1 | 86 | TP53                       | MODERATE                   | c.182A>G;<br>c.263A>G;<br>c.542A>G;<br>c.659A>G                                                                      | p.Tyr61Cys;<br>p.Tyr88Cys;<br>p.Tyr181Cys<br>;<br>p.Tyr220Cys           | 277 | FALSE | chr17:757<br>8190:T:C  | 113:chr17:<br>7578190:T<br>:C  | 0.000498 |
| 86_c3-1 | 86 | TSC2                       | MODERATE                   | c.2702G>A                                                                                                            | p.Arg901His                                                             | 0   | FALSE | chr16:212<br>6131:G:A  | 113:chr16:<br>2126131:G<br>:A  | 0.000354 |
| 86_c3-1 | 86 | PIK3R1                     | MODERATE                   | c.1082G>A<br>;<br>c.1271G>A<br>;<br>c.1361G>A<br>;<br>c.2171G>A                                                      | p.Arg361Gln<br>;<br>p.Arg424Gln<br>;<br>p.Arg454Gln<br>;<br>p.Arg724Gln | 1   | FALSE | chr5:6759<br>3425:G:A  | 113:chr5:6<br>7593425:G<br>:A  | 0.000534 |

|         |    |                   |                            |                                                                  |                                                    |    |       |                             |                                 |          |
|---------|----|-------------------|----------------------------|------------------------------------------------------------------|----------------------------------------------------|----|-------|-----------------------------|---------------------------------|----------|
| 86_c3-1 | 86 | ATM               | MODERATE                   | c.2075G>A                                                        | p.Arg692His                                        | 0  | FALSE | chr11:108<br>124717:G:<br>A | 113:chr11:<br>10812471<br>7:G:A | 0.00074  |
| 86_c3-1 | 86 | CDH1              | MODERATE                   | c.760G>A                                                         | p.Asp254As<br>n                                    | 0  | FALSE | chr16:688<br>44172:G:A      | 113:chr16:<br>68844172:<br>G:A  | 0.00036  |
| 86_c3-1 | 86 | NTRK1             | MODERATE                   | c.1322C>A<br>;<br>c.1412C>A<br>;<br>c.1430C>A                    | p.Ser441Tyr;<br>p.Ser471Tyr;<br>p.Ser477Tyr        | 1  | FALSE | chr1:1568<br>45387:C:A      | 113:chr1:1<br>56845387:<br>C:A  | 0.000405 |
| 86_c3-1 | 86 | TP53              | MODIFIER; MODERATE         | c.-13G>T;<br>c.105G>T;<br>c.-279G>T;<br>c.-360G>T                | p.Leu35Phe                                         | 2  | FALSE | chr17:757<br>9582:C:A       | 113:chr17:<br>7579582:C<br>:A   | 0.000445 |
| 86_c3-1 | 86 | NF1               | HIGH                       | c.3826C>T                                                        | p.Arg1276*                                         | 4  | FALSE | chr17:295<br>62746:C:T      | 113:chr17:<br>29562746:<br>C:T  | 0.000371 |
| 86_c3-1 | 86 | TP53              | LOW; MODIFIER;<br>MODERATE | c.-6C>T;<br>c.355C>T;<br>c.472C>T;<br>c.76C>T                    | p.Arg119Cys<br>;<br>p.Arg158Cys<br>;<br>p.Arg26Cys | 17 | FALSE | chr17:757<br>8458:G:A       | 113:chr17:<br>7578458:G<br>:A   | 0.00036  |
| 86_c3-1 | 86 | ERBB2;<br>MIR4728 | MODERATE; MODIFIER         | c.1880C>T;<br>c.1925C>T;<br>c.1970C>T;<br>n.2294C>T<br>; n.-1C>T | p.Ala627Val;<br>p.Ala642Val;<br>p.Ala657Val;       | 1  | FALSE | chr17:378<br>79595:C:T      | 113:chr17:<br>37879595:<br>C:T  | 0.000658 |
| 86_c3-1 | 86 | TP53              | MODERATE; MODIFIER         | c.128C>T;<br>c.245C>T;<br>c.-279C>T;<br>c.-360C>T                | p.Pro43Leu;<br>p.Pro82Leu;                         | 6  | FALSE | chr17:757<br>9442:G:A       | 113:chr17:<br>7579442:G<br>:A   | 0.000685 |

|         |    |                 |                    |                                                                                                                                                                   |                                                                                                                                                                |    |       |                             |                                 |          |
|---------|----|-----------------|--------------------|-------------------------------------------------------------------------------------------------------------------------------------------------------------------|----------------------------------------------------------------------------------------------------------------------------------------------------------------|----|-------|-----------------------------|---------------------------------|----------|
| 86_c3-1 | 86 | FGFR2           | MODERATE; MODIFIER | c.1858A>G;<br>;<br>c.1861A>G;<br>;<br>c.1864A>G;<br>;<br>c.1873A>G;<br>;<br>c.1942A>G;<br>;<br>c.1945A>G;<br>;<br>c.2209A>G;<br>;<br>c.2212A>G;<br>;<br>n.2659A>G | p.Arg620Gly;<br>;<br>p.Arg621Gly;<br>;<br>p.Arg622Gly;<br>;<br>p.Arg625Gly;<br>;<br>p.Arg648Gly;<br>;<br>p.Arg649Gly;<br>;<br>p.Arg737Gly;<br>;<br>p.Arg738Gly | 1  | FALSE | chr10:123<br>243304:T:<br>C | 113:chr10:<br>12324330<br>4:T:C | 0.000452 |
| 86_c3-1 | 86 | TP53            | MODERATE           | c.322C>T;<br>c.403C>T;<br>c.682C>T;<br>c.799C>T                                                                                                                   | p.Arg108Trp;<br>;<br>p.Arg135Trp;<br>;<br>p.Arg228Trp;<br>;<br>p.Arg267Trp                                                                                     | 31 | FALSE | chr17:757<br>7139:G:A       | 113:chr17:<br>7577139:G<br>:A   | 0.000403 |
| 86_c3-1 | 86 | TSC2            | MODERATE           | c.1654G>A                                                                                                                                                         | p.Ala552Thr                                                                                                                                                    | 0  | FALSE | chr16:211<br>5574:G:A       | 113:chr16:<br>2115574:G<br>:A   | 0.000906 |
| 86_c3-1 | 86 | GAPDH;<br>IFFO1 | MODERATE; MODIFIER | c.217G>A;<br>c.343G>A;<br>c.*1743C><br>T;<br>c.*1746C><br>T;<br>c.*1770C><br>T;<br>n.*2798C><br>T                                                                 | p.Gly73Arg;<br>p.Gly115Arg                                                                                                                                     | 0  | FALSE | chr12:664<br>6282:G:A       | 113:chr12:<br>6646282:G<br>:A   | 0.000639 |
| 86_c3-1 | 86 | NF1             | MODERATE           | c.3407G>A                                                                                                                                                         | p.Arg1136Gln                                                                                                                                                   | 2  | FALSE | chr17:295<br>59810:G:A      | 113:chr17:<br>29559810:<br>G:A  | 0.00034  |
| 86_c3-1 | 86 | FGFR3           | MODERATE           | c.599G>A                                                                                                                                                          | p.Arg200His                                                                                                                                                    | 1  | FALSE | chr4:1803<br>247:G:A        | 113:chr4:1<br>803247:G:<br>A    | 0.0006   |
| 86_c3-1 | 86 | NTRK1           | MODERATE           | c.804C>G;<br>c.894C>G                                                                                                                                             | p.His268Gln;<br>;<br>p.His298Gln                                                                                                                               | 1  | FALSE | chr1:1568<br>43468:C:G      | 113:chr1:1<br>56843468:<br>C:G  | 0.00082  |
| 86_c3-1 | 86 | ATM             | MODERATE           | c.5225C>T                                                                                                                                                         | p.Ala1742Val                                                                                                                                                   | 0  | FALSE | chr11:108<br>172422:C:<br>T | 113:chr11:<br>10817242<br>2:C:T | 0.000854 |
| 86_c3-1 | 86 | TSC2            | MODERATE           | c.1610G>A                                                                                                                                                         | p.Arg537His                                                                                                                                                    | 0  | FALSE | chr16:211<br>5530:G:A       | 113:chr16:<br>2115530:G<br>:A   | 0.000686 |
| 86_c3-1 | 86 | FLT3            | MODERATE           | c.2822C>T                                                                                                                                                         | p.Ser941Leu                                                                                                                                                    | 0  | FALSE | chr13:285<br>88626:G:A      | 113:chr13:<br>28588626:<br>G:A  | 0.000261 |

|         |    |        |          |                                                  |                                                                         |    |       |                             |                                 |          |
|---------|----|--------|----------|--------------------------------------------------|-------------------------------------------------------------------------|----|-------|-----------------------------|---------------------------------|----------|
| 86_c3-1 | 86 | PIK3R1 | MODERATE | c.1709T>C;<br>c.620T>C;<br>c.809T>C;<br>c.899T>C | p.Leu570Pro<br>;<br>p.Leu207Pro<br>;<br>p.Leu270Pro<br>;<br>p.Leu300Pro | 2  | FALSE | chr5:6759<br>1116:T:C       | 113:chr5:6<br>7591116:T<br>:C   | 0.000542 |
| 86_c3-1 | 86 | PIK3CA | MODERATE | c.241G>A                                         | p.Glu81Lys                                                              | 38 | FALSE | chr3:1789<br>16854:G:A      | 113:chr3:1<br>78916854:<br>G:A  | 0.000685 |
| 86_c3-1 | 86 | PDGFRA | MODERATE | c.421G>A                                         | p.Glu141Lys                                                             | 1  | FALSE | chr4:5512<br>9887:G:A       | 113:chr4:5<br>5129887:G<br>:A   | 0.000397 |
| 86_c3-1 | 86 | AR     | MODERATE | c.2086G>A<br>; c.490G>A                          | p.Asp696Asn<br>;<br>p.Asp164Asn                                         | 0  | FALSE | chrX:6693<br>1444:G:A       | 113:chrX:6<br>6931444:G<br>:A   | 0.00033  |
| 86_c3-1 | 86 | KIT    | MODERATE | c.2454T>A;<br>c.2466T>A                          | p.Asn818Lys<br>;<br>p.Asn822Lys                                         | 20 | FALSE | chr4:5559<br>9340:T:A       | 113:chr4:5<br>5599340:T<br>:A   | 0.000473 |
| 86_c3-1 | 86 | TP53   | MODERATE | c.364G>A;<br>c.481G>A;<br>c.4G>A;<br>c.85G>A     | p.Ala122Thr<br>;<br>p.Ala161Thr<br>;<br>p.Ala2Thr;<br>p.Ala29Thr        | 53 | FALSE | chr17:757<br>8449:C:T       | 113:chr17:<br>7578449:C<br>:T   | 0.000533 |
| 86_c3-1 | 86 | ATM    | HIGH     | c.3663G>A                                        | p.Trp1221*                                                              | 0  | FALSE | chr11:108<br>153523:G:<br>A | 113:chr11:<br>10815352<br>3:G:A | 0.000451 |
| 86_c3-1 | 86 | ATM    | MODERATE | c.3070G>A                                        | p.Ala1024Thr                                                            | 0  | FALSE | chr11:108<br>142126:G:<br>A | 113:chr11:<br>10814212<br>6:G:A | 0.00053  |
| 86_c3-1 | 86 | TP53   | MODERATE | c.167T>C;<br>c.446T>C;<br>c.563T>C;<br>c.86T>C   | p.Leu56Pro;<br>p.Leu149Pro<br>;<br>p.Leu188Pro<br>; p.Leu29Pro          | 1  | FALSE | chr17:757<br>8286:A:G       | 113:chr17:<br>7578286:A<br>:G   | 0.000491 |
| 86_c3-1 | 86 | ATM    | MODERATE | c.6179G>A                                        | p.Arg2060His                                                            | 0  | FALSE | chr11:108<br>186821:G:<br>A | 113:chr11:<br>10818682<br>1:G:A | 0.001056 |
| 86_c3-1 | 86 | PDGFRA | MODERATE | c.571G>A                                         | p.Ala191Thr                                                             | 1  | FALSE | chr4:5513<br>0037:G:A       | 113:chr4:5<br>5130037:G<br>:A   | 0.000629 |
| 86_c3-1 | 86 | IGF1R  | MODERATE | c.4007G>A<br>;<br>c.4010G>A                      | p.Arg1336His<br>;<br>p.Arg1337His                                       | 0  | FALSE | chr15:995<br>00577:G:A      | 113:chr15:<br>99500577:<br>G:A  | 0.000519 |
| 86_c3-1 | 86 | FGFR3  | MODERATE | c.539G>A                                         | p.Gly180Asp                                                             | 1  | FALSE | chr4:1803<br>187:G:A        | 113:chr4:1<br>803187:G:<br>A    | 0.000351 |

|         |    |                |                    |                                                                                                                            |                                                               |     |       |                        |                                |          |
|---------|----|----------------|--------------------|----------------------------------------------------------------------------------------------------------------------------|---------------------------------------------------------------|-----|-------|------------------------|--------------------------------|----------|
| 86_c3-1 | 86 | MITF           | MODIFIER; MODERATE | c.-45G>A;<br>c.109G>A;<br>c.112G>A;<br>c.64G>A                                                                             | ; p.Ala37Thr;<br>p.Ala38Thr;<br>p.Ala22Thr                    | 0   | FALSE | chr3:6992<br>8292:G:A  | 113:chr3:6<br>9928292:G<br>:A  | 0.000443 |
| 86_c3-1 | 86 | PTEN           | MODERATE           | c.397G>A                                                                                                                   | p.Val133Ile                                                   | 2   | FALSE | chr10:896<br>92913:G:A | 113:chr10:<br>89692913:<br>G:A | 0.000395 |
| 86_c3-1 | 86 | NTRK1          | MODERATE           | c.1009G>A<br>; c.919G>A                                                                                                    | p.Ala337Thr<br>;<br>p.Ala307Thr                               | 2   | FALSE | chr1:1568<br>43583:G:A | 113:chr1:1<br>56843583:<br>G:A | 0.000318 |
| 86_c3-1 | 86 | IGF1R          | MODERATE           | c.1732G>A                                                                                                                  | p.Ala578Thr                                                   | 0   | FALSE | chr15:994<br>56415:G:A | 113:chr15:<br>99456415:<br>G:A | 0.000587 |
| 86_c3-1 | 86 | MAP2K1         | MODERATE           | c.371C>A                                                                                                                   | p.Pro124Gln                                                   | 1   | FALSE | chr15:667<br>29163:C:A | 113:chr15:<br>66729163:<br>C:A | 0.000461 |
| 86_c3-1 | 86 | FBXW7          | MODERATE           | c.1039C>T;<br>c.1153C>T;<br>c.1393C>T                                                                                      | p.Arg347Cys<br>;<br>p.Arg385Cys<br>;<br>p.Arg465Cys           | 0   | FALSE | chr4:1532<br>49385:G:A | 113:chr4:1<br>53249385:<br>G:A | 0.001293 |
| 86_c3-1 | 86 | CSDE1;<br>NRAS | MODIFIER; MODERATE | c.*2430C><br>T;<br>c.*2523C><br>T;<br>c.*2817C><br>T;<br>c.*2910C><br>T;<br>c.*2964C><br>T;<br>c.*3057C><br>T;<br>c.173C>T | ; p.Thr58Ile                                                  | 1   | FALSE | chr1:1152<br>56538:G:A | 113:chr1:1<br>15256538:<br>G:A | 0.000666 |
| 86_c3-1 | 86 | CDH1           | MODERATE           | c.893C>T                                                                                                                   | p.Ala298Val                                                   | 0   | FALSE | chr16:688<br>45647:C:T | 113:chr16:<br>68845647:<br>C:T | 0.000637 |
| 86_c3-1 | 86 | IGF1R          | MODERATE           | c.3005G>A<br>;<br>c.3008G>A                                                                                                | p.Arg1002Gln<br>;<br>p.Arg1003Gln                             | 0   | FALSE | chr15:994<br>78104:G:A | 113:chr15:<br>99478104:<br>G:A | 0.000307 |
| 86_c3-1 | 86 | SMO            | MODERATE           | c.1045A>C                                                                                                                  | p.Thr349Pro                                                   | 0   | FALSE | chr7:1288<br>46115:A:C | 113:chr7:1<br>28846115:<br>A:C | 0.008646 |
| 86_c3-1 | 86 | PDGFRA         | MODERATE           | c.827C>T                                                                                                                   | p.Thr276Met                                                   | 1   | FALSE | chr4:5513<br>3523:C:T  | 113:chr4:5<br>5133523:C<br>:T  | 0.000394 |
| 86_c3-1 | 86 | TP53           | MODERATE           | c.128G>A;<br>c.407G>A;<br>c.47G>A;<br>c.524G>A                                                                             | p.Arg43His;<br>p.Arg136His<br>;<br>p.Arg16His;<br>p.Arg175His | 979 | FALSE | chr17:757<br>8406:C:T  | 113:chr17:<br>7578406:C<br>:T  | 0.000327 |

|         |    |                    |                    |                                                                               |                                                            |     |       |                        |                                |          |
|---------|----|--------------------|--------------------|-------------------------------------------------------------------------------|------------------------------------------------------------|-----|-------|------------------------|--------------------------------|----------|
| 86_c3-1 | 86 | MIR4673;<br>NOTCH1 | MODIFIER; MODERATE | n.*59A>C;<br>c.1195A>C                                                        | p.Thr399Pro                                                | 0   | FALSE | chr9:1394<br>12649:T:G | 113:chr9:1<br>39412649:<br>T:G | 0.005145 |
| 86_c3-1 | 86 | KDR                | MODERATE           | c.1028C>T                                                                     | p.Thr343Me<br>t                                            | 3   | FALSE | chr4:5597<br>6884:G:A  | 113:chr4:5<br>5976884:G<br>:A  | 0.000322 |
| 86_c3-1 | 86 | PTEN               | MODERATE           | c.389G>A                                                                      | p.Arg130Gln                                                | 89  | FALSE | chr10:896<br>92905:G:A | 113:chr10:<br>89692905:<br>G:A | 0.000593 |
| 86_c3-1 | 86 | TSC2               | MODERATE           | c.1819G>A                                                                     | p.Ala607Thr                                                | 0   | FALSE | chr16:212<br>0559:G:A  | 113:chr16:<br>2120559:G<br>:A  | 0.00032  |
| 86_c3-1 | 86 | NOTCH1             | MODERATE           | c.4966G>A                                                                     | p.Gly1656Se<br>r                                           | 0   | FALSE | chr9:1393<br>99177:C:T | 113:chr9:1<br>39399177:<br>C:T | 0.001195 |
| 86_c3-1 | 86 | MET                | MODERATE           | c.1640G>A                                                                     | p.Arg547Gln                                                | 1   | FALSE | chr7:1163<br>81018:G:A | 113:chr7:1<br>16381018:<br>G:A | 0.000314 |
| 86_c3-1 | 86 | ALK                | MODERATE           | c.1184G>A                                                                     | p.Arg395His                                                | 1   | FALSE | chr2:2960<br>6696:C:T  | 113:chr2:2<br>9606696:C<br>:T  | 0.000391 |
| 86_c3-1 | 86 | PKD1;<br>TSC2      | MODIFIER; MODERATE | c.*13118G<br>>A;<br>c.*13121G<br>>A;<br>c.4091C>T;<br>c.4223C>T;<br>c.4292C>T | p.Ser1364Le<br>u;<br>p.Ser1408Le<br>u;<br>p.Ser1431Le<br>u | 0   | FALSE | chr16:213<br>4515:C:T  | 113:chr16:<br>2134515:C<br>:T  | 0.000606 |
| 86_c3-1 | 86 | EPHA3              | MODERATE           | c.2800G>A                                                                     | p.Gly934Ser                                                | 0   | FALSE | chr3:8952<br>1723:G:A  | 113:chr3:8<br>9521723:G<br>:A  | 0.000458 |
| 86_c3-1 | 86 | NOTCH1             | MODERATE           | c.5852G>A                                                                     | p.Ser1951As<br>n                                           | 0   | FALSE | chr9:1393<br>95086:C:T | 113:chr9:1<br>39395086:<br>C:T | 0.000491 |
| 86_c3-1 | 86 | FGFR4              | MODERATE           | c.1978G>A<br>;<br>c.2062G>A<br>;<br>c.2182G>A                                 | p.Ala660Thr<br>;<br>p.Ala688Thr<br>;<br>p.Ala728Thr        | 1   | FALSE | chr5:1765<br>24321:G:A | 113:chr5:1<br>76524321:<br>G:A | 0.000574 |
| 86_c3-1 | 86 | CWH43              | MODERATE           | c.1393G>A<br>;<br>c.1474G>A                                                   | p.Asp465As<br>n;<br>p.Asp492As<br>n                        | 0   | FALSE | chr4:4903<br>2943:G:A  | 113:chr4:4<br>9032943:G<br>:A  | 0.000772 |
| 86_c3-1 | 86 | PIK3CA             | MODERATE           | c.1624G>A                                                                     | p.Glu542Lys                                                | 777 | FALSE | chr3:1789<br>36082:G:A | 113:chr3:1<br>78936082:<br>G:A | 0.004583 |
| 86_c3-1 | 86 | EGFR;<br>EGFR-AS1  | MODERATE; MODIFIER | c.2300C>T;<br>n.1262G>A                                                       | p.Ala767Val;                                               | 5   | FALSE | chr7:5524<br>9002:C:T  | 113:chr7:5<br>5249002:C<br>:T  | 0.000284 |
| 86_c3-1 | 86 | CDKN2A             | MODIFIER; HIGH     | c.194-<br>3575G>A;<br>c.45G>A                                                 | p.Trp15*                                                   | 3   | FALSE | chr9:2197<br>4782:C:T  | 113:chr9:2<br>1974782:C<br>:T  | 0.000549 |
| 86_c3-1 | 86 | CDKN2A             | MODIFIER; MODERATE | c.194-<br>3568A>C;<br>c.52A>C                                                 | p.Thr18Pro                                                 | 1   | FALSE | chr9:2197<br>4775:T:G  | 113:chr9:2<br>1974775:T<br>:G  | 0.010839 |



|         |    |                             |                    |                                                                                               |                                                          |    |       |                        |                                |          |
|---------|----|-----------------------------|--------------------|-----------------------------------------------------------------------------------------------|----------------------------------------------------------|----|-------|------------------------|--------------------------------|----------|
| 86_c3-1 | 86 | SMO                         | MODERATE           | c.1685G>A                                                                                     | p.Arg562Gln                                              | 0  | FALSE | chr7:1288<br>50838:G:A | 113:chr7:1<br>28850838:<br>G:A | 0.000311 |
| 86_c3-1 | 86 | KIT                         | MODERATE           | c.2375G>A<br>;<br>c.2387G>A                                                                   | p.Arg792Lys<br>;<br>p.Arg796Lys                          | 18 | FALSE | chr4:5559<br>9261:G:A  | 113:chr4:5<br>5599261:G<br>:A  | 0.000473 |
| 86_c3-1 | 86 | PDGFRA                      | MODERATE           | c.401C>T                                                                                      | p.Thr134Met                                              | 3  | FALSE | chr4:5512<br>9867:C:T  | 113:chr4:5<br>5129867:C<br>:T  | 0.000359 |
| 86_c3-1 | 86 | ERBB2;<br>MIEN1;<br>MIR4728 | MODERATE; MODIFIER | c.2236G>A<br>;<br>c.2281G>A<br>;<br>c.2326G>A<br>;<br>n.2650G>A<br>;<br>c.*388C>T;<br>n.-1G>A | p.Gly746Ser<br>;<br>p.Gly761Ser<br>;<br>p.Gly776Ser<br>; | 5  | FALSE | chr17:378<br>80997:G:A | 113:chr17:<br>37880997:<br>G:A | 0.000563 |
| 86_c3-1 | 86 | TP53                        | MODIFIER; MODERATE | c.-11G>A;<br>c.350G>A;<br>c.467G>A;<br>c.71G>A                                                | p.Arg117His<br>;<br>p.Arg156His<br>;<br>p.Arg24His       | 26 | FALSE | chr17:757<br>8463:C:T  | 113:chr17:<br>7578463:C<br>:T  | 0.000536 |
| 86_c3-1 | 86 | EGFR;<br>EGFR-AS1           | MODERATE; MODIFIER | c.2393T>C;<br>n.1169A>G                                                                       | p.Leu798Pro<br>;                                         | 3  | FALSE | chr7:5524<br>9095:T:C  | 113:chr7:5<br>5249095:T<br>:C  | 0.001772 |
| 86_c3-1 | 86 | FGFR3                       | MODERATE           | c.395G>A                                                                                      | p.Gly132Glu                                              | 1  | FALSE | chr4:1801<br>489:G:A   | 113:chr4:1<br>801489:G:<br>A   | 0.000448 |
| 86_c3-1 | 86 | ERBB2;<br>MIEN1;<br>MIR4728 | MODERATE; MODIFIER | c.2542C>T;<br>c.2587C>T;<br>c.2632C>T;<br>n.2956C>T<br>;<br>c.*388G>A<br>; n.-1C>T            | p.His848Tyr;<br>p.His863Tyr;<br>p.His878Tyr;             | 2  | FALSE | chr17:378<br>81440:C:T | 113:chr17:<br>37881440:<br>C:T | 0.017694 |
| 86_c3-1 | 86 | NOTCH1                      | MODERATE           | c.4549G>A                                                                                     | p.Asp1517Asn                                             | 0  | FALSE | chr9:1393<br>99799:C:T | 113:chr9:1<br>39399799:<br>C:T | 0.000431 |
| 86_c3-1 | 86 | IDH1                        | MODERATE           | c.1013G>C                                                                                     | p.Arg338Thr                                              | 1  | FALSE | chr2:2091<br>03936:C:G | 113:chr2:2<br>09103936:<br>C:G | 0.000346 |
| 86_c3-1 | 86 | HRAS;<br>LRRC56             | MODERATE; MODIFIER | c.175G>A;<br>c.-506C>T                                                                        | p.Ala59Thr;                                              | 2  | FALSE | chr11:533<br>881:C:T   | 113:chr11:<br>533881:C:<br>T   | 0.000542 |
| 86_c3-1 | 86 | EGFR                        | MODERATE           | c.3352G>A                                                                                     | p.Ala1118Thr                                             | 3  | FALSE | chr7:5527<br>3029:G:A  | 113:chr7:5<br>5273029:G<br>:A  | 0.000306 |
| 86_c3-1 | 86 | CTNNB1                      | MODERATE           | c.113G>A                                                                                      | p.Gly38Asp                                               | 0  | FALSE | chr3:4126<br>6116:G:A  | 113:chr3:4<br>1266116:G<br>:A  | 0.000574 |

|          |    |                    |                    |                                                   |                                                                  |    |       |                    |                        |          |
|----------|----|--------------------|--------------------|---------------------------------------------------|------------------------------------------------------------------|----|-------|--------------------|------------------------|----------|
| 86_c3-1  | 86 | RET                | MODERATE           | c.1907C>T                                         | p.Thr636Met                                                      | 1  | FALSE | chr10:43609955:C:T | 113:chr10:43609955:C:T | 0.000565 |
| 86_c3-1  | 86 | NF1                | MODERATE           | c.5426G>A;<br>;<br>c.5489G>A                      | p.Arg1809His;<br>p.Arg1830His                                    | 1  | FALSE | chr17:29654737:G:A | 113:chr17:29654737:G:A | 0.000298 |
| 86_c3-1  | 86 | TP53               | MODERATE           | c.141T>A;<br>c.420T>A;<br>c.537T>A;<br>c.60T>A    | p.His47Gln;<br>p.His140Gln;<br>;<br>p.His179Gln;<br>; p.His20Gln | 17 | FALSE | chr17:7578393:A:T  | 113:chr17:7578393:A:T  | 0.000306 |
| 26_c11-1 | 26 | MITF               | MODERATE           | c.127A>C;<br>c.235A>C;<br>c.280A>C;<br>c.283A>C   | p.Thr43Pro;<br>p.Thr79Pro;<br>p.Thr94Pro;<br>p.Thr95Pro          | 0  | FALSE | chr3:69928463:A:C  | 114:chr3:69928463:A:C  | 0.163651 |
| 26_c11-1 | 26 | NF1                | HIGH               | c.3028C>T                                         | p.Gln1010*                                                       | 2  | FALSE | chr17:29557315:C:T | 114:chr17:29557315:C:T | 0.001192 |
| 26_c11-1 | 26 | TP53               | MODIFIER; MODERATE | c.-18T>C;<br>c.-99T>C;<br>; c.262T>C;<br>c.379T>C | p.Ser88Pro;<br>p.Ser127Pro                                       | 12 | FALSE | chr17:7578551:A:G  | 114:chr17:7578551:A:G  | 0.002851 |
| 26_c11-1 | 26 | MIR4673;<br>NOTCH1 | MODIFIER; MODERATE | n.*59A>C;<br>; c.1195A>C                          | p.Thr399Pro                                                      | 0  | FALSE | chr9:139412649:T:G | 114:chr9:139412649:T:G | 0.005341 |
| 26_c11-1 | 26 | PIK3CA             | MODERATE           | c.1093G>A                                         | p.Glu365Lys                                                      | 6  | FALSE | chr3:178922324:G:A | 114:chr3:178922324:G:A | 0.001198 |
| 26_c11-1 | 26 | NRAS               | MODERATE           | c.553C>T                                          | p.Pro185Ser                                                      | 2  | FALSE | chr1:115251173:G:A | 114:chr1:115251173:G:A | 0.001156 |
| 26_c11-1 | 26 | ERBB2              | MODERATE; MODIFIER | c.275C>T;<br>c.320C>T;<br>c.365C>T;<br>n.689C>T   | p.Pro92Leu;<br>p.Pro107Leu;<br>;<br>p.Pro122Leu;<br>;            | 1  | FALSE | chr17:37864713:C:T | 114:chr17:37864713:C:T | 0.000951 |
| 26_c11-1 | 26 | PDGFRA             | MODERATE           | c.577G>A                                          | p.Val193Ile                                                      | 2  | FALSE | chr4:55130043:G:A  | 114:chr4:55130043:G:A  | 0.000916 |
| 26_c11-1 | 26 | TP53               | MODIFIER; MODERATE | c.-57T>C;<br>c.25T>C;<br>c.304T>C;<br>c.421T>C    | p.Cys9Arg;<br>p.Cys102Arg;<br>;<br>p.Cys141Arg                   | 23 | FALSE | chr17:7578509:A:G  | 114:chr17:7578509:A:G  | 0.001142 |
| 26_c11-1 | 26 | NOTCH1             | MODERATE           | c.5939T>C                                         | p.Leu1980Pro                                                     | 0  | FALSE | chr9:139393707:A:G | 114:chr9:139393707:A:G | 0.001462 |

|          |    |        |                    |                                                                                                                 |                                                                                                                   |       |       |                             |                                 |          |
|----------|----|--------|--------------------|-----------------------------------------------------------------------------------------------------------------|-------------------------------------------------------------------------------------------------------------------|-------|-------|-----------------------------|---------------------------------|----------|
| 26_c11-1 | 26 | CDKN2A | MODIFIER; MODERATE | c.194-3531C>T;<br>c.89C>T                                                                                       | ; p.Ala30Val                                                                                                      | 3     | FALSE | chr9:2197<br>4738:G:A       | 114:chr9:2<br>1974738:G<br>:A   | 0.001435 |
| 26_c11-1 | 26 | FGFR2  | MODIFIER; MODERATE | c.939+481<br>3C>T;<br>c.1238C>T;<br>c.1241C>T;<br>c.893C>T;<br>c.902C>T;<br>c.971C>T;<br>c.974C>T;<br>n.1688C>T | ; p.Pro413Leu<br>;<br>p.Pro414Leu<br>;<br>p.Pro298Leu<br>;<br>p.Pro301Leu<br>;<br>p.Pro324Leu<br>;<br>p.Pro325Leu | 1     | FALSE | chr10:123<br>274680:G:<br>A | 114:chr10:<br>12327468<br>0:G:A | 0.001526 |
| 26_c11-1 | 26 | GNA11  | MODERATE           | c.1030G>A                                                                                                       | p.Val344Me<br>t                                                                                                   | 1     | FALSE | chr19:312<br>1127:G:A       | 114:chr19:<br>3121127:G<br>:A   | 0.001585 |
| 26_c11-1 | 26 | FBXW7  | MODERATE           | c.1160G>A<br>;<br>c.1274G>A<br>;<br>c.1514G>A                                                                   | p.Arg387His<br>;<br>p.Arg425His<br>;<br>p.Arg505His                                                               | 0     | FALSE | chr4:1532<br>47288:C:T      | 114:chr4:1<br>53247288:<br>C:T  | 0.001001 |
| 26_c11-1 | 26 | BRAF   | MODERATE           | c.1799T>A                                                                                                       | p.Val600Glu                                                                                                       | 23024 | FALSE | chr7:1404<br>53136:A:T      | 114:chr7:1<br>40453136:<br>A:T  | 0.004023 |
| 26_c11-1 | 26 | NTRK2  | MODERATE           | c.2024G>A<br>;<br>c.2072G>A                                                                                     | p.Arg675His<br>;<br>p.Arg691His                                                                                   | 0     | FALSE | chr9:8757<br>0332:G:A       | 114:chr9:8<br>7570332:G<br>:A   | 0.001117 |
| 26_c11-1 | 26 | CDH1   | MODERATE           | c.1528G>A                                                                                                       | p.Ala510Thr                                                                                                       | 0     | FALSE | chr16:688<br>49625:G:A      | 114:chr16:<br>68849625:<br>G:A  | 0.000986 |
| 26_c11-1 | 26 | TP53   | MODERATE           | c.341G>A;<br>c.422G>A;<br>c.701G>A;<br>c.818G>A                                                                 | p.Arg114His<br>;<br>p.Arg141His<br>;<br>p.Arg234His<br>;<br>p.Arg273His                                           | 647   | TRUE  | chr17:757<br>7120:C:T       | 114:chr17:<br>7577120:C<br>:T   | 0.001696 |
| 26_c11-1 | 26 | STK11  | MODERATE           | c.613G>A                                                                                                        | p.Ala205Thr                                                                                                       | 1     | FALSE | chr19:122<br>0595:G:A       | 114:chr19:<br>1220595:G<br>:A   | 0.001382 |
| 26_c11-1 | 26 | MAP2K1 | MODERATE           | c.140G>A                                                                                                        | p.Arg47Gln                                                                                                        | 4     | FALSE | chr15:667<br>27424:G:A      | 114:chr15:<br>66727424:<br>G:A  | 0.000994 |
| 26_c11-1 | 26 | TP53   | MODERATE           | c.130T>C;<br>c.409T>C;<br>c.49T>C;<br>c.526T>C                                                                  | p.Cys44Arg;<br>p.Cys137Arg<br>;<br>p.Cys17Arg;<br>p.Cys176Arg                                                     | 15    | FALSE | chr17:757<br>8404:A:G       | 114:chr17:<br>7578404:A<br>:G   | 0.001083 |

|          |    |                   |                    |                                                                               |                                                             |   |       |                     |                         |          |
|----------|----|-------------------|--------------------|-------------------------------------------------------------------------------|-------------------------------------------------------------|---|-------|---------------------|-------------------------|----------|
| 26_c11-1 | 26 | NOTCH1            | MODERATE           | c.4252G>A                                                                     | p.Ala1418Thr                                                | 0 | FALSE | chr9:139400096:C:T  | 114:chr9:139400096:C:T  | 0.001271 |
| 26_c11-1 | 26 | KDR               | MODERATE           | c.2323G>T                                                                     | p.Ala775Ser                                                 | 1 | FALSE | chr4:55964914:C:A   | 114:chr4:55964914:C:A   | 0.013181 |
| 26_c11-1 | 26 | IDH1              | MODERATE           | c.355C>T                                                                      | p.Arg119Trp                                                 | 1 | FALSE | chr2:209113152:G:A  | 114:chr2:209113152:G:A  | 0.001255 |
| 26_c11-1 | 26 | NTRK1             | MODERATE           | c.1937G>A;<br>c.2027G>A;<br>c.2045G>A                                         | p.Arg646His;<br>p.Arg676His;<br>p.Arg682His                 | 1 | FALSE | chr1:156849153:G:A  | 114:chr1:156849153:G:A  | 0.001049 |
| 26_c11-1 | 26 | RET               | MODERATE           | c.1690A>C                                                                     | p.Thr564Pro                                                 | 1 | FALSE | chr10:43608342:A:C  | 114:chr10:43608342:A:C  | 0.052882 |
| 26_c11-1 | 26 | ROS1              | HIGH               | c.5728C>T                                                                     | p.Arg1910*                                                  | 1 | FALSE | chr6:117642471:G:A  | 114:chr6:117642471:G:A  | 0.001037 |
| 26_c11-1 | 26 | SMO               | MODERATE           | c.1045A>C                                                                     | p.Thr349Pro                                                 | 0 | FALSE | chr7:128846115:A:C  | 114:chr7:128846115:A:C  | 0.029444 |
| 26_c11-1 | 26 | NF1               | MODERATE           | c.2695T>G                                                                     | p.Leu899Val                                                 | 3 | FALSE | chr17:29556328:T:G  | 114:chr17:29556328:T:G  | 0.045861 |
| 26_c11-1 | 26 | TP53              | MODERATE           | c.203C>T;<br>c.284C>T;<br>c.563C>T;<br>c.680C>T                               | p.Ser68Phe;<br>p.Ser95Phe;<br>p.Ser188Phe;<br>p.Ser227Phe   | 8 | FALSE | chr17:7577601:G:A   | 114:chr17:7577601:G:A   | 0.001145 |
| 26_c11-1 | 26 | ATM               | MODERATE           | c.2077T>C                                                                     | p.Cys693Arg                                                 | 0 | FALSE | chr11:108124719:T:C | 114:chr11:108124719:T:C | 0.001077 |
| 26_c11-1 | 26 | TP53              | MODIFIER; MODERATE | c.*145T>C;<br>c.*233T>C;<br>c.1009T>C;<br>c.1126T>C;<br>c.649T>C;<br>c.730T>C | p.Ser337Pro;<br>p.Ser376Pro;<br>p.Ser217Pro;<br>p.Ser244Pro | 2 | FALSE | chr17:7572983:A:G   | 114:chr17:7572983:A:G   | 0.004288 |
| 26_c11-1 | 26 | EGFR;<br>EGFR-AS1 | MODERATE; MODIFIER | c.2518G>A;<br>n.-1C>T                                                         | p.Ala840Thr                                                 | 2 | FALSE | chr7:55259460:G:A   | 114:chr7:55259460:G:A   | 0.001102 |
| 26_c11-1 | 26 | NTRK1             | MODERATE           | c.1940T>G;<br>c.2030T>G;<br>c.2048T>G                                         | p.Val647Gly;<br>p.Val677Gly;<br>p.Val683Gly                 | 2 | FALSE | chr1:156849792:T:G  | 114:chr1:156849792:T:G  | 0.022727 |
| 26_c11-1 | 26 | NF1               | MODERATE           | c.8070G>T;<br>c.8133G>T                                                       | p.Leu2690Phe;<br>p.Leu2711Phe                               | 1 | FALSE | chr17:29686006:G:T  | 114:chr17:29686006:G:T  | 0.006098 |

|          |    |                             |                    |                                                                                                                                                           |                                                                                                                                                              |   |       |                             |                                 |          |
|----------|----|-----------------------------|--------------------|-----------------------------------------------------------------------------------------------------------------------------------------------------------|--------------------------------------------------------------------------------------------------------------------------------------------------------------|---|-------|-----------------------------|---------------------------------|----------|
| 26_c11-1 | 26 | ERBB2;<br>MIEN1;<br>MIR4728 | MODERATE; MODIFIER | c.2720A>G<br>;<br>c.2765A>G<br>;<br>c.2810A>G<br>;<br>n.3134A>G<br>;<br>c.*388T>C;<br>n.-1A>G                                                             | p.Lys907Arg<br>;<br>p.Lys922Arg<br>;<br>p.Lys937Arg<br>;                                                                                                     | 1 | FALSE | chr17:378<br>82044:A:G      | 114:chr17:<br>37882044:<br>A:G  | 0.001619 |
| 26_c11-1 | 26 | CTNNB1                      | MODERATE           | c.1286G>A                                                                                                                                                 | p.Cys429Tyr                                                                                                                                                  | 0 | FALSE | chr3:4127<br>5120:G:A       | 114:chr3:4<br>1275120:G<br>:A   | 0.000991 |
| 26_c11-1 | 26 | MAP2K1                      | MODERATE           | c.159T>A                                                                                                                                                  | p.Phe53Leu                                                                                                                                                   | 1 | FALSE | chr15:667<br>27443:T:A      | 114:chr15:<br>66727443:<br>T:A  | 0.001063 |
| 26_c11-1 | 26 | TP53                        | MODIFIER; LOW      | c.-100C>T;<br>c.-19C>T;<br>c.261C>T;<br>c.378C>T                                                                                                          | ; p.Tyr87Tyr;<br>p.Tyr126Tyr                                                                                                                                 | 5 | FALSE | chr17:757<br>8552:G:A       | 114:chr17:<br>7578552:G<br>:A   | 0.001135 |
| 26_c11-1 | 26 | EPHA3                       | MODERATE           | c.947A>C                                                                                                                                                  | p.Asp316Ala                                                                                                                                                  | 0 | FALSE | chr3:8939<br>0198:A:C       | 114:chr3:8<br>9390198:A<br>:C   | 0.001879 |
| 26_c11-1 | 26 | C9orf53;<br>CDKN2A          | MODIFIER; MODERATE | n.*616C>G<br>;<br>c.*140G>C<br>;<br>c.217G>C;<br>c.260G>C                                                                                                 | ; p.Ala73Pro;<br>p.Arg87Pro                                                                                                                                  | 1 | FALSE | chr9:2197<br>1141:C:G       | 114:chr9:2<br>1971141:C<br>:G   | 0.011142 |
| 26_c11-1 | 26 | EGFR                        | MODIFIER; MODERATE | c.*2133G><br>A;<br>c.*2364G><br>A;<br>c.2030G>A                                                                                                           | ; p.Arg677His                                                                                                                                                | 5 | FALSE | chr7:5524<br>0786:G:A       | 114:chr7:5<br>5240786:G<br>:A   | 0.001541 |
| 26_c11-1 | 26 | FGFR2                       | MODERATE; MODIFIER | c.1591G>A<br>;<br>c.1594G>A<br>;<br>c.1597G>A<br>;<br>c.1606G>A<br>;<br>c.1675G>A<br>;<br>c.1678G>A<br>;<br>c.1942G>A<br>;<br>c.1945G>A<br>;<br>n.2392G>A | p.Ala531Thr<br>;<br>p.Ala532Thr<br>;<br>p.Ala533Thr<br>;<br>p.Ala536Thr<br>;<br>p.Ala559Thr<br>;<br>p.Ala560Thr<br>;<br>p.Ala648Thr<br>;<br>p.Ala649Thr<br>; | 3 | FALSE | chr10:123<br>247549:C:<br>T | 114:chr10:<br>12324754<br>9:C:T | 0.001257 |
| 26_c11-1 | 26 | KDR                         | MODERATE           | c.3152G>A                                                                                                                                                 | p.Arg1051Gl<br>n                                                                                                                                             | 1 | FALSE | chr4:5595<br>6163:C:T       | 114:chr4:5<br>5956163:C<br>:T   | 0.0011   |

|          |    |                 |                    |                                                                                                                                                                                |                                                                                                                      |     |       |                        |                                |          |
|----------|----|-----------------|--------------------|--------------------------------------------------------------------------------------------------------------------------------------------------------------------------------|----------------------------------------------------------------------------------------------------------------------|-----|-------|------------------------|--------------------------------|----------|
| 26_c11-1 | 26 | FGFR1;<br>LETM2 | MODERATE; MODIFIER | c.1927C>T;<br>c.1933C>T;<br>c.2170C>T;<br>c.2194C>T;<br>c.2200C>T;<br>c.2293C>T;<br>c.*1406G><br>A;<br>c.*1423G><br>A;<br>c.*1553G><br>A;<br>c.*1567G><br>A;<br>c.*1638G><br>A | p.Arg643Trp<br>;<br>p.Arg645Trp<br>;<br>p.Arg724Trp<br>;<br>p.Arg732Trp<br>;<br>p.Arg734Trp<br>;<br>p.Arg765Trp<br>; | 1   | FALSE | chr8:3827<br>1528:G:A  | 114:chr8:3<br>8271528:G<br>:A  | 0.001428 |
| 26_c11-1 | 26 | NOTCH1          | MODERATE           | c.5281C>T                                                                                                                                                                      | p.Arg1761Trp                                                                                                         | 0   | FALSE | chr9:1393<br>96827:G:A | 114:chr9:1<br>39396827:<br>G:A | 0.001332 |
| 26_c11-1 | 26 | TP53            | MODERATE           | c.367C>T;<br>c.448C>T;<br>c.727C>T;<br>c.844C>T                                                                                                                                | p.Arg123Trp<br>;<br>p.Arg150Trp<br>;<br>p.Arg243Trp<br>;<br>p.Arg282Trp                                              | 479 | FALSE | chr17:757<br>7094:G:A  | 114:chr17:<br>7577094:G<br>:A  | 0.001093 |
| 26_c11-1 | 26 | EGFR            | MODERATE           | c.2872C>T                                                                                                                                                                      | p.Arg958Cys                                                                                                          | 1   | FALSE | chr7:5526<br>8032:C:T  | 114:chr7:5<br>5268032:C<br>:T  | 0.001018 |
| 26_c11-1 | 26 | NTRK1           | MODERATE           | c.821C>T;<br>c.911C>T                                                                                                                                                          | p.Ser274Phe<br>;<br>p.Ser304Phe                                                                                      | 1   | FALSE | chr1:1568<br>43485:C:T | 114:chr1:1<br>56843485:<br>C:T | 0.001188 |
| 26_c11-1 | 26 | CTNNB1          | MODERATE           | c.643G>A                                                                                                                                                                       | p.Ala215Thr                                                                                                          | 0   | FALSE | chr3:4126<br>6972:G:A  | 114:chr3:4<br>1266972:G<br>:A  | 0.001002 |
| 26_c11-1 | 26 | NOTCH1          | MODERATE           | c.4571C>T                                                                                                                                                                      | p.Ala1524Val                                                                                                         | 0   | FALSE | chr9:1393<br>99777:G:A | 114:chr9:1<br>39399777:<br>G:A | 0.001704 |
| 26_c11-1 | 26 | IGF1R           | MODERATE           | c.3905T>C;<br>c.3908T>C                                                                                                                                                        | p.Val1302Ala<br>;<br>p.Val1303Ala                                                                                    | 0   | FALSE | chr15:995<br>00475:T:C | 114:chr15:<br>99500475:<br>T:C | 0.008706 |
| 26_c11-1 | 26 | CDKN2A          | MODIFIER; MODERATE | c.194-<br>3537T>G;<br>c.83T>G                                                                                                                                                  | ; p.Val28Gly                                                                                                         | 1   | FALSE | chr9:2197<br>4744:A:C  | 114:chr9:2<br>1974744:A<br>:C  | 0.05456  |
| 26_c11-1 | 26 | CTNNB1          | MODERATE           | c.122C>A                                                                                                                                                                       | p.Thr41Asn                                                                                                           | 0   | FALSE | chr3:4126<br>6125:C:A  | 114:chr3:4<br>1266125:C<br>:A  | 0.001053 |

|          |    |                    |                             |                                                           |                                                               |     |       |                        |                                |          |
|----------|----|--------------------|-----------------------------|-----------------------------------------------------------|---------------------------------------------------------------|-----|-------|------------------------|--------------------------------|----------|
| 26_c11-1 | 26 | TP53               | MODERATE                    | c.374C>T;<br>c.455C>T;<br>c.734C>T;<br>c.851C>T           | p.Thr125Ile;<br>p.Thr152Ile;<br>p.Thr245Ile;<br>p.Thr284Ile   | 1   | FALSE | chr17:757<br>7087:G:A  | 114:chr17:<br>7577087:G<br>:A  | 0.001082 |
| 26_c11-1 | 26 | C9orf53;<br>CDKN2A | MODIFIER; MODERATE          | n.*616G>A<br>;<br>c.*314C>T;<br>c.*35C>T;<br>c.391C>T     | ; p.Arg131Cys                                                 | 2   | FALSE | chr9:2197<br>0967:G:A  | 114:chr9:2<br>1970967:G<br>:A  | 0.001096 |
| 26_c11-1 | 26 | C9orf53;<br>CDKN2A | MODIFIER; MODERATE;<br>HIGH | n.*616G>A<br>;<br>c.*161C>T;<br>c.281C>T;<br>c.238C>T     | ; p.Pro94Leu;<br>p.Arg80*                                     | 124 | FALSE | chr9:2197<br>1120:G:A  | 114:chr9:2<br>1971120:G<br>:A  | 0.001932 |
| 26_c11-1 | 26 | TP53               | MODERATE                    | c.110G>A;<br>c.191G>A;<br>c.470G>A;<br>c.587G>A           | p.Arg37Gln;<br>p.Arg64Gln;<br>p.Arg157Gln<br>;<br>p.Arg196Gln | 19  | FALSE | chr17:757<br>8262:C:T  | 114:chr17:<br>7578262:C<br>:T  | 0.001546 |
| 70_c8-1  | 70 | DDR2               | MODERATE                    | c.1418G>A                                                 | p.Arg473His                                                   | 2   | FALSE | chr1:1627<br>40216:G:A | 115:chr1:1<br>62740216:<br>G:A | 0.001377 |
| 70_c8-1  | 70 | CDKN2A             | MODIFIER; MODERATE          | c.194-<br>3537T>G;<br>c.83T>G                             | ; p.Val28Gly                                                  | 1   | FALSE | chr9:2197<br>4744:A:C  | 115:chr9:2<br>1974744:A<br>:C  | 0.069945 |
| 70_c8-1  | 70 | NTRK1              | MODERATE                    | c.1937G>A<br>;<br>c.2027G>A<br>;<br>c.2045G>A             | p.Arg646His<br>;<br>p.Arg676His<br>;<br>p.Arg682His           | 1   | FALSE | chr1:1568<br>49153:G:A | 115:chr1:1<br>56849153:<br>G:A | 0.000962 |
| 70_c8-1  | 70 | TP53               | MODIFIER; HIGH              | c.-48C>T;<br>c.313C>T;<br>c.34C>T;<br>c.430C>T            | ; p.Gln105*;<br>p.Gln12*;<br>p.Gln144*                        | 42  | FALSE | chr17:757<br>8500:G:A  | 115:chr17:<br>7578500:G<br>:A  | 0.000908 |
| 70_c8-1  | 70 | CDH1               | MODERATE                    | c.1198G>A                                                 | p.Asp400As<br>n                                               | 0   | FALSE | chr16:688<br>47276:G:A | 115:chr16:<br>68847276:<br>G:A | 0.001008 |
| 70_c8-1  | 70 | C9orf53;<br>CDKN2A | MODIFIER; MODERATE          | n.*616A>C<br>;<br>c.*137T>G<br>;<br>c.214T>G;<br>c.257T>G | ; p.Cys72Gly;<br>p.Leu86Arg                                   | 1   | FALSE | chr9:2197<br>1144:A:C  | 115:chr9:2<br>1971144:A<br>:C  | 0.002463 |
| 70_c8-1  | 70 | EGFR               | MODERATE                    | c.3289G>A                                                 | p.Val1097Ile                                                  | 1   | FALSE | chr7:5527<br>2966:G:A  | 115:chr7:5<br>5272966:G<br>:A  | 0.001079 |

|         |    |                                 |                    |                                               |                                                          |   |       |                        |                                |          |
|---------|----|---------------------------------|--------------------|-----------------------------------------------|----------------------------------------------------------|---|-------|------------------------|--------------------------------|----------|
| 70_c8-1 | 70 | FGFR3                           | MODIFIER; MODERATE | c.931-375C>T;<br>c.1195C>T;<br>c.1201C>T      | ; p.Arg399Cys<br>;<br>p.Arg401Cys                        | 1 | FALSE | chr4:1806<br>176:C:T   | 115:chr4:1<br>806176:C:<br>T   | 0.001089 |
| 70_c8-1 | 70 | TP53                            | MODERATE           | c.365C>T;<br>c.482C>T;<br>c.5C>T;<br>c.86C>T  | p.Ala122Val;<br>p.Ala161Val;<br>p.Ala2Val;<br>p.Ala29Val | 9 | FALSE | chr17:757<br>8448:G:A  | 115:chr17:<br>7578448:G<br>:A  | 0.000956 |
| 70_c8-1 | 70 | NTRK1                           | MODERATE           | c.1940T>G<br>;<br>c.2030T>G<br>;<br>c.2048T>G | p.Val647Gly;<br>p.Val677Gly;<br>p.Val683Gly              | 2 | FALSE | chr1:1568<br>49792:T:G | 115:chr1:1<br>56849792:<br>T:G | 0.035489 |
| 70_c8-1 | 70 | TSC1                            | MODERATE           | c.1091C>T;<br>c.1241C>T;<br>c.1244C>T         | p.Thr364Ile;<br>p.Thr414Ile;<br>p.Thr415Ile              | 0 | FALSE | chr9:1357<br>85977:G:A | 115:chr9:1<br>35785977:<br>G:A | 0.001271 |
| 70_c8-1 | 70 | SMO                             | MODERATE           | c.961G>A                                      | p.Val321Met                                              | 0 | FALSE | chr7:1288<br>46031:G:A | 115:chr7:1<br>28846031:<br>G:A | 0.001854 |
| 70_c8-1 | 70 | ALK                             | MODERATE           | c.4319C>T                                     | p.Ala1440Val                                             | 1 | FALSE | chr2:2941<br>6634:G:A  | 115:chr2:2<br>9416634:G<br>:A  | 0.000837 |
| 70_c8-1 | 70 | RET                             | MODERATE           | c.1907C>T                                     | p.Thr636Met                                              | 1 | FALSE | chr10:436<br>09955:C:T | 115:chr10:<br>43609955:<br>C:T | 0.001174 |
| 70_c8-1 | 70 | CDKN2A                          | MODIFIER; MODERATE | c.194-3568A>C;<br>c.52A>C                     | ; p.Thr18Pro                                             | 1 | FALSE | chr9:2197<br>4775:T:G  | 115:chr9:2<br>1974775:T<br>:G  | 0.048005 |
| 70_c8-1 | 70 | INSRR;<br>NTRK1                 | MODIFIER; MODERATE | c.3397+28<br>C>T;<br>c.13G>A                  | ; p.Ala5Thr                                              | 3 | FALSE | chr1:1568<br>11876:G:A | 115:chr1:1<br>56811876:<br>G:A | 0.000851 |
| 70_c8-1 | 70 | FOXL2;<br>FOXL2NB;<br>LINC01391 | MODERATE; MODIFIER | c.205G>A;<br>c.-132C>T;<br>n.-1G>A            | p.Glu69Lys;                                              | 0 | FALSE | chr3:1386<br>65360:C:T | 115:chr3:1<br>38665360:<br>C:T | 0.001032 |
| 70_c8-1 | 70 | ESR1                            | MODERATE           | c.571T>C                                      | p.Tyr191His                                              | 0 | FALSE | chr6:1521<br>63850:T:C | 115:chr6:1<br>52163850:<br>T:C | 0.00106  |
| 70_c8-1 | 70 | CTNNB1                          | MODERATE           | c.1972G>T                                     | p.Val658Phe                                              | 0 | FALSE | chr3:4127<br>8096:G:T  | 115:chr3:4<br>1278096:G<br>:T  | 0.003517 |
| 70_c8-1 | 70 | FGFR3                           | MODERATE           | c.905G>A                                      | p.Gly302Asp                                              | 1 | FALSE | chr4:1803<br>727:G:A   | 115:chr4:1<br>803727:G:<br>A   | 0.001514 |
| 70_c8-1 | 70 | BRAF                            | MODERATE           | c.1061G>A                                     | p.Arg354Gln                                              | 3 | FALSE | chr7:1404<br>94187:C:T | 115:chr7:1<br>40494187:<br>C:T | 0.001029 |



|         |    |                           |                    |                                                                                                    |                                                |   |       |                        |                                |          |
|---------|----|---------------------------|--------------------|----------------------------------------------------------------------------------------------------|------------------------------------------------|---|-------|------------------------|--------------------------------|----------|
| 70_c8-1 | 70 | C9orf53;<br>CDKN2A        | MODIFIER; MODERATE | n.*616C>G<br>;<br>c.*140G>C<br>;<br>c.217G>C;<br>c.260G>C                                          | p.Ala73Pro;<br>p.Arg87Pro                      | 1 | FALSE | chr9:2197<br>1141:C:G  | 115:chr9:2<br>1971141:C<br>:G  | 0.010539 |
| 70_c8-1 | 70 | ALK                       | MODERATE           | c.3455T>C                                                                                          | p.Leu1152Pro                                   | 1 | FALSE | chr2:2944<br>5270:A:G  | 115:chr2:2<br>9445270:A<br>:G  | 0.004285 |
| 70_c8-1 | 70 | IGF1R                     | MODERATE           | c.3934T>C;<br>c.3937T>C                                                                            | p.Ser1312Pro;<br>p.Ser1313Pro                  | 0 | FALSE | chr15:995<br>00504:T:C | 115:chr15:<br>99500504:<br>T:C | 0.041176 |
| 70_c8-1 | 70 | KIT                       | MODERATE           | c.1366C>T                                                                                          | p.Pro456Ser                                    | 2 | FALSE | chr4:5559<br>2042:C:T  | 115:chr4:5<br>5592042:C<br>:T  | 0.000964 |
| 70_c8-1 | 70 | BRAF                      | MODERATE           | c.2044C>T                                                                                          | p.Arg682Trp                                    | 1 | FALSE | chr7:1404<br>39695:G:A | 115:chr7:1<br>40439695:<br>G:A | 0.001129 |
| 70_c8-1 | 70 | MIR4673;<br>NOTCH1        | MODIFIER; MODERATE | n.*59A>C;<br>c.1195A>C                                                                             | p.Thr399Pro                                    | 0 | FALSE | chr9:1394<br>12649:T:G | 115:chr9:1<br>39412649:<br>T:G | 0.010582 |
| 70_c8-1 | 70 | MIR1225;<br>PKD1;<br>TSC2 | MODIFIER; MODERATE | n.*90C>T;<br>c.*13118C<br>>T;<br>c.*13121C<br>>T;<br>c.4954G>A<br>;<br>c.5086G>A<br>;<br>c.5155G>A | p.Ala1652Thr;<br>p.Ala1696Thr;<br>p.Ala1719Thr | 0 | FALSE | chr16:213<br>8135:G:A  | 115:chr16:<br>2138135:G<br>:A  | 0.000883 |
| 70_c8-1 | 70 | EPHA3                     | MODERATE           | c.1535G>A                                                                                          | p.Arg512Gln                                    | 0 | FALSE | chr3:8944<br>8571:G:A  | 115:chr3:8<br>9448571:G<br>:A  | 0.001683 |
| 70_c8-1 | 70 | FLT3                      | MODERATE           | c.2678C>T                                                                                          | p.Pro893Leu                                    | 0 | FALSE | chr13:285<br>89369:G:A | 115:chr13:<br>28589369:<br>G:A | 0.001169 |
| 70_c8-1 | 70 | STK11                     | MODERATE           | c.488G>A                                                                                           | p.Gly163Asp                                    | 1 | FALSE | chr19:122<br>0395:G:A  | 115:chr19:<br>1220395:G<br>:A  | 0.001948 |
| 70_c8-1 | 70 | VHL                       | MODIFIER; MODERATE | c.341-<br>3270A>C;<br>c.344A>C                                                                     | p.His115Pro                                    | 0 | FALSE | chr3:1018<br>8201:A:C  | 115:chr3:1<br>0188201:A<br>:C  | 0.003565 |
| 70_c8-1 | 70 | MET                       | MODERATE           | c.3815T>C;<br>c.3869T>C                                                                            | p.Leu1272Pro;<br>p.Leu1290Pro                  | 2 | FALSE | chr7:1164<br>35725:T:C | 115:chr7:1<br>16435725:<br>T:C | 0.001465 |
| 70_c8-1 | 70 | NOTCH1                    | HIGH               | c.3225G>A                                                                                          | p.Trp1075*                                     | 0 | FALSE | chr9:1394<br>02784:C:T | 115:chr9:1<br>39402784:<br>C:T | 0.001024 |

|         |    |                                 |                            |                                                                                                                                                                                |                                                                                                                      |   |       |                             |                                 |          |
|---------|----|---------------------------------|----------------------------|--------------------------------------------------------------------------------------------------------------------------------------------------------------------------------|----------------------------------------------------------------------------------------------------------------------|---|-------|-----------------------------|---------------------------------|----------|
| 70_c8-1 | 70 | MITF                            | MODERATE                   | c.127A>C;<br>c.235A>C;<br>c.280A>C;<br>c.283A>C                                                                                                                                | p.Thr43Pro;<br>p.Thr79Pro;<br>p.Thr94Pro;<br>p.Thr95Pro                                                              | 0 | FALSE | chr3:6992<br>8463:A:C       | 115:chr3:6<br>9928463:A<br>:C   | 0.184305 |
| 70_c8-1 | 70 | SMO                             | MODERATE                   | c.1045A>C                                                                                                                                                                      | p.Thr349Pro                                                                                                          | 0 | FALSE | chr7:1288<br>46115:A:C      | 115:chr7:1<br>28846115:<br>A:C  | 0.037727 |
| 70_c8-1 | 70 | STK11                           | MODERATE                   | c.628T>C                                                                                                                                                                       | p.Cys210Arg                                                                                                          | 1 | FALSE | chr19:122<br>0610:T:C       | 115:chr19:<br>1220610:T<br>:C   | 0.008479 |
| 70_c8-1 | 70 | C9orf53;<br>CDKN2A              | MODIFIER; MODERATE;<br>LOW | n.*616C>A<br>;<br>c.*183G>T<br>;<br>c.260G>T;<br>c.303G>T                                                                                                                      | p.Arg87Leu;<br>p.Pro101Pro                                                                                           | 2 | FALSE | chr9:2197<br>1098:C:A       | 115:chr9:2<br>1971098:C<br>:A   | 0.000918 |
| 70_c8-1 | 70 | KIT                             | MODERATE                   | c.1835C>T;<br>c.1847C>T                                                                                                                                                        | p.Ala612Val;<br>p.Ala616Val                                                                                          | 1 | FALSE | chr4:5559<br>4061:C:T       | 115:chr4:5<br>5594061:C<br>:T   | 0.001898 |
| 70_c8-1 | 70 | ATM                             | MODERATE                   | c.5639C>G                                                                                                                                                                      | p.Thr1880Ar<br>g                                                                                                     | 0 | FALSE | chr11:108<br>175544:C:<br>G | 115:chr11:<br>10817554<br>4:C:G | 0.011688 |
| 70_c8-1 | 70 | FGFR1;<br>LETM2                 | MODERATE; MODIFIER         | c.1927C>T;<br>c.1933C>T;<br>c.2170C>T;<br>c.2194C>T;<br>c.2200C>T;<br>c.2293C>T;<br>c.*1406G><br>A;<br>c.*1423G><br>A;<br>c.*1553G><br>A;<br>c.*1567G><br>A;<br>c.*1638G><br>A | p.Arg643Trp<br>;<br>p.Arg645Trp<br>;<br>p.Arg724Trp<br>;<br>p.Arg732Trp<br>;<br>p.Arg734Trp<br>;<br>p.Arg765Trp<br>; | 1 | FALSE | chr8:3827<br>1528:G:A       | 115:chr8:3<br>8271528:G<br>:A   | 0.001258 |
| 70_c8-1 | 70 | FOXL2;<br>FOXL2NB;<br>LINC01391 | MODERATE; MODIFIER         | c.282T>A;<br>c.-132A>T;<br>n.-1T>A                                                                                                                                             | p.Asn94Lys;                                                                                                          | 0 | FALSE | chr3:1386<br>65283:A:T      | 115:chr3:1<br>38665283:<br>A:T  | 0.008677 |
| 70_c8-1 | 70 | HGF                             | MODERATE                   | c.580G>A;<br>c.595G>A                                                                                                                                                          | p.Glu194Lys<br>;<br>p.Glu199Lys                                                                                      | 0 | FALSE | chr7:8138<br>1466:C:T       | 115:chr7:8<br>1381466:C<br>:T   | 0.001014 |

|         |    |                             |                    |                                                                                                                      |                                                                         |     |       |                    |                        |          |
|---------|----|-----------------------------|--------------------|----------------------------------------------------------------------------------------------------------------------|-------------------------------------------------------------------------|-----|-------|--------------------|------------------------|----------|
| 70_c8-1 | 70 | FGFR3                       | MODERATE           | c.682T>C                                                                                                             | p.Cys228Arg                                                             | 2   | FALSE | chr4:1803413:T:C   | 115:chr4:1803413:T:C   | 0.001038 |
| 70_c8-1 | 70 | TP53                        | MODIFIER; MODERATE | c.-3G>A;<br>c.358G>A;<br>c.475G>A;<br>c.79G>A                                                                        | p.Ala120Thr<br>;<br>p.Ala159Thr<br>;<br>p.Ala27Thr                      | 23  | FALSE | chr17:7578455:C:T  | 115:chr17:7578455:C:T  | 0.000928 |
| 70_c8-1 | 70 | TP53                        | MODERATE; MODIFIER | c.208G>A;<br>c.91G>A; c.<br>279G>A; c.<br>360G>A                                                                     | p.Ala70Thr;<br>p.Ala31Thr;                                              | 1   | FALSE | chr17:7579479:C:T  | 115:chr17:7579479:C:T  | 0.001828 |
| 70_c8-1 | 70 | TP53                        | MODIFIER; MODERATE | c.-204G>A;<br>c.-87G>A;<br>c.31G>A; c.<br>279G>A; c.-<br>360G>A                                                      | ; p.Glu11Lys                                                            | 11  | FALSE | chr17:7579882:C:T  | 115:chr17:7579882:C:T  | 0.000944 |
| 70_c8-1 | 70 | ERBB2;<br>MIEN1;<br>MIR4728 | MODIFIER; MODERATE | c.3160-<br>213A>G;<br>c.3251A>G<br>;<br>c.3296A>G<br>;<br>c.3341A>G<br>;<br>n.3665A>G<br>;<br>c.*388T>C;<br>n.*67A>G | p.Glu1084Gly;<br>p.Glu1099Gly;<br>p.Glu1114Gly                          | 1   | FALSE | chr17:37883729:A:G | 115:chr17:37883729:A:G | 0.003467 |
| 70_c8-1 | 70 | NF1                         | MODERATE           | c.5426G>A<br>;<br>c.5489G>A                                                                                          | p.Arg1809His;<br>p.Arg1830His                                           | 1   | FALSE | chr17:29654737:G:A | 115:chr17:29654737:G:A | 0.000821 |
| 70_c8-1 | 70 | NTRK2                       | MODIFIER; MODERATE | c.854-<br>37G>A;<br>c.856G>A                                                                                         | ; p.Ala286Thr                                                           | 0   | FALSE | chr9:87342571:G:A  | 115:chr9:87342571:G:A  | 0.0012   |
| 70_c8-1 | 70 | CTNNB1                      | MODERATE           | c.62C>T                                                                                                              | p.Ala21Val                                                              | 0   | FALSE | chr3:41266065:C:T  | 115:chr3:41266065:C:T  | 0.001134 |
| 70_c8-1 | 70 | TP53                        | MODERATE           | c.367C>T;<br>c.448C>T;<br>c.727C>T;<br>c.844C>T                                                                      | p.Arg123Trp<br>;<br>p.Arg150Trp<br>;<br>p.Arg243Trp<br>;<br>p.Arg282Trp | 479 | FALSE | chr17:7577094:G:A  | 115:chr17:7577094:G:A  | 0.00105  |

|         |    |       |                    |                                                                               |                                                                                                                 |   |       |                        |                                |          |
|---------|----|-------|--------------------|-------------------------------------------------------------------------------|-----------------------------------------------------------------------------------------------------------------|---|-------|------------------------|--------------------------------|----------|
| 70_c8-1 | 70 | TP53  | MODIFIER; MODERATE | c.*145T>C;<br>c.*233T>C;<br>c.1009T>C;<br>c.1126T>C;<br>c.649T>C;<br>c.730T>C | p.Ser337Pro<br>;<br>p.Ser376Pro<br>;<br>p.Ser217Pro<br>;<br>p.Ser244Pro                                         | 2 | FALSE | chr17:757<br>2983:A:G  | 115:chr17:<br>7572983:A<br>:G  | 0.00727  |
| 70_c8-1 | 70 | FGFR3 | MODERATE           | c.1162G>A<br>;<br>c.1498G>A<br>;<br>c.1504G>A                                 | p.Ala388Thr<br>;<br>p.Ala500Thr<br>;<br>p.Ala502Thr                                                             | 1 | FALSE | chr4:1807<br>167:G:A   | 115:chr4:1<br>807167:G:<br>A   | 0.001149 |
| 70_c8-1 | 70 | RPL19 | MODERATE           | c.452G>A                                                                      | p.Arg151His                                                                                                     | 0 | FALSE | chr17:373<br>60425:G:A | 115:chr17:<br>37360425:<br>G:A | 0.00108  |
| 70_c8-1 | 70 | MET   | MODERATE           | c.487T>C                                                                      | p.Ser163Pro                                                                                                     | 1 | FALSE | chr7:1163<br>39625:T:C | 115:chr7:1<br>16339625:<br>T:C | 0.000901 |
| 70_c8-1 | 70 | NF1   | MODERATE           | c.2695T>G                                                                     | p.Leu899Val                                                                                                     | 3 | FALSE | chr17:295<br>56328:T:G | 115:chr17:<br>29556328:<br>T:G | 0.039058 |
| 70_c8-1 | 70 | FGFR1 | MODERATE           | c.475C>T;<br>c.481C>T;<br>c.724C>T;<br>c.742C>T;<br>c.748C>T;<br>c.841C>T     | p.Arg159Trp<br>;<br>p.Arg161Trp<br>;<br>p.Arg242Trp<br>;<br>p.Arg248Trp<br>;<br>p.Arg250Trp<br>;<br>p.Arg281Trp | 2 | FALSE | chr8:3828<br>2215:G:A  | 115:chr8:3<br>8282215:G<br>:A  | 0.001432 |
| 70_c8-1 | 70 | AKT3  | MODERATE           | c.899C>T                                                                      | p.Ala300Val                                                                                                     | 0 | FALSE | chr1:2437<br>27071:G:A | 115:chr1:2<br>43727071:<br>G:A | 0.001172 |
| 70_c8-1 | 70 | RPL19 | MODERATE           | c.406C>T                                                                      | p.Arg136Trp                                                                                                     | 0 | FALSE | chr17:373<br>60379:C:T | 115:chr17:<br>37360379:<br>C:T | 0.000968 |
| 70_c8-1 | 70 | NTRK3 | LOW                | c.1560G>A<br>;<br>c.1584G>A                                                   | p.Thr520Thr<br>;<br>p.Thr528Thr                                                                                 | 0 | FALSE | chr15:885<br>76089:C:T | 115:chr15:<br>88576089:<br>C:T | 0.001026 |
| 70_c8-1 | 70 | TP53  | MODERATE           | c.242G>C;<br>c.323G>C;<br>c.602G>C;<br>c.719G>C                               | p.Ser81Thr;<br>p.Ser108Thr<br>;<br>p.Ser201Thr<br>;<br>p.Ser240Thr                                              | 6 | FALSE | chr17:757<br>7562:C:G  | 115:chr17:<br>7577562:C<br>:G  | 0.001009 |

|         |    |                             |                    |                                                                                        |                                                                           |    |       |                        |                                |          |
|---------|----|-----------------------------|--------------------|----------------------------------------------------------------------------------------|---------------------------------------------------------------------------|----|-------|------------------------|--------------------------------|----------|
| 70_c8-1 | 70 | TP53                        | MODIFIER; MODERATE | c.*117G>T;<br>; c.*29G>T;<br>c.1010G>T<br>;<br>c.533G>T;<br>c.614G>T;<br>c.893G>T      | ; p.Arg337Leu<br>;<br>p.Arg178Leu<br>;<br>p.Arg205Leu<br>;<br>p.Arg298Leu | 21 | FALSE | chr17:757<br>4017:C:A  | 115:chr17:<br>7574017:C<br>:A  | 0.029653 |
| 70_c8-1 | 70 | EPHA3                       | MODERATE           | c.1543G>A                                                                              | p.Ala515Thr                                                               | 0  | FALSE | chr3:8944<br>8579:G:A  | 115:chr3:8<br>9448579:G<br>:A  | 0.001103 |
| 70_c8-1 | 70 | IGF1R                       | MODERATE           | c.3905T>C;<br>c.3908T>C                                                                | p.Val1302Ala;<br>p.Val1303Ala                                             | 0  | FALSE | chr15:995<br>00475:T:C | 115:chr15:<br>99500475:<br>T:C | 0.010864 |
| 70_c8-1 | 70 | IGF1R                       | MODERATE           | c.3733C>T;<br>c.3736C>T                                                                | p.Arg1245Cys;<br>p.Arg1246Cys                                             | 0  | FALSE | chr15:995<br>00303:C:T | 115:chr15:<br>99500303:<br>C:T | 0.001224 |
| 70_c8-1 | 70 | ERBB2;<br>MIEN1;<br>MIR4728 | MODERATE; MODIFIER | c.2596C>T;<br>c.2641C>T;<br>c.2686C>T;<br>; n.3010C>T<br>;<br>; c.*388G>A<br>; n.-1C>T | p.Arg866Cys<br>p.Arg881Cys<br>;<br>p.Arg896Cys                            | 3  | FALSE | chr17:378<br>81616:C:T | 115:chr17:<br>37881616:<br>C:T | 0.001233 |
| 70_c8-1 | 70 | ESR1                        | MODERATE           | c.739G>A;<br>c.745G>A                                                                  | p.Glu247Lys<br>;<br>p.Glu249Lys                                           | 0  | FALSE | chr6:1522<br>01885:G:A | 115:chr6:1<br>52201885:<br>G:A | 0.001414 |
| 70_c8-1 | 70 | CDH1                        | HIGH               | c.172G>T                                                                               | p.Glu58*                                                                  | 0  | FALSE | chr16:688<br>35581:G:T | 115:chr16:<br>68835581:<br>G:T | 0.001053 |
| 70_c8-1 | 70 | DDR2                        | MODERATE           | c.13C>T                                                                                | p.Pro5Ser                                                                 | 1  | FALSE | chr1:1626<br>88866:C:T | 115:chr1:1<br>62688866:<br>C:T | 0.000976 |
| 70_c8-1 | 70 | STK11                       | HIGH               | c.409C>T                                                                               | p.Gln137*                                                                 | 1  | FALSE | chr19:121<br>9357:C:T  | 115:chr19:<br>1219357:C<br>:T  | 0.001024 |
| 70_c8-1 | 70 | CDH1                        | MODERATE           | c.1901C>T                                                                              | p.Ala634Val                                                               | 0  | FALSE | chr16:688<br>56093:C:T | 115:chr16:<br>68856093:<br>C:T | 0.000962 |
| 70_c8-1 | 70 | RET                         | MODERATE           | c.1690A>C                                                                              | p.Thr564Pro                                                               | 1  | FALSE | chr10:436<br>08342:A:C | 115:chr10:<br>43608342:<br>A:C | 0.049311 |
| 70_c8-1 | 70 | FGFR3                       | MODERATE           | c.599G>A                                                                               | p.Arg200His                                                               | 1  | FALSE | chr4:1803<br>247:G:A   | 115:chr4:1<br>803247:G:<br>A   | 0.001108 |
| 75_c9-1 | 75 | CDKN2A                      | MODIFIER; MODERATE | c.194-<br>3537T>G;<br>c.83T>G                                                          | ; p.Val28Gly                                                              | 1  | FALSE | chr9:2197<br>4744:A:C  | 116:chr9:2<br>1974744:A<br>:C  | 0.092486 |

|         |    |                             |                    |                                                                                                                      |                                                            |   |       |                        |                                |          |
|---------|----|-----------------------------|--------------------|----------------------------------------------------------------------------------------------------------------------|------------------------------------------------------------|---|-------|------------------------|--------------------------------|----------|
| 75_c9-1 | 75 | GAPDH;<br>IFFO1             | MODERATE; MODIFIER | c.683T>C;<br>c.809T>C;<br>c.*1743A><br>G;<br>c.*1746A><br>G;<br>c.*1770A><br>G;<br>n.*2798A><br>G                    | p.Leu228Pro<br>;<br>p.Leu270Pro<br>;                       | 0 | FALSE | chr12:664<br>7033:T:C  | 116:chr12:<br>6647033:T<br>:C  | 0.003922 |
| 75_c9-1 | 75 | CDKN2A                      | MODIFIER; MODERATE | c.194-<br>3570C>G;<br>c.50C>G                                                                                        | p.Ala17Gly                                                 | 1 | FALSE | chr9:2197<br>4777:G:C  | 116:chr9:2<br>1974777:G<br>:C  | 0.022222 |
| 75_c9-1 | 75 | INTRK2                      | MODERATE           | c.1225G>A<br>;<br>c.1264G>A                                                                                          | p.Val409Ile;<br>p.Val422Ile                                | 0 | FALSE | chr9:8735<br>9956:G:A  | 116:chr9:8<br>7359956:G<br>:A  | 0.00198  |
| 75_c9-1 | 75 | TP53                        | MODERATE; MODIFIER | c.208G>A;<br>c.91G>A; c.<br>279G>A; c.<br>360G>A                                                                     | p.Ala70Thr;<br>p.Ala31Thr;                                 | 1 | FALSE | chr17:757<br>9479:C:T  | 116:chr17:<br>7579479:C<br>:T  | 0.002717 |
| 75_c9-1 | 75 | ERBB2;<br>MIEN1;<br>MIR4728 | MODIFIER; MODERATE | c.3160-<br>213A>G;<br>c.3251A>G<br>;<br>c.3296A>G<br>;<br>c.3341A>G<br>;<br>n.3665A>G<br>;<br>c.*388T>C;<br>n.*67A>G | p.Glu1084Gl<br>y;<br>p.Glu1099Gl<br>y;<br>p.Glu1114Gl<br>y | 1 | FALSE | chr17:378<br>83729:A:G | 116:chr17:<br>37883729:<br>A:G | 0.002323 |
| 75_c9-1 | 75 | HGF                         | MODERATE           | c.767G>A;<br>c.782G>A                                                                                                | p.Arg256His<br>;<br>p.Arg261His                            | 0 | FALSE | chr7:8137<br>2752:C:T  | 116:chr7:8<br>1372752:C<br>:T  | 0.002326 |
| 75_c9-1 | 75 | FGFR4                       | MODERATE           | c.976G>A                                                                                                             | p.Glu326Lys                                                | 1 | FALSE | chr5:1765<br>19704:G:A | 116:chr5:1<br>76519704:<br>G:A | 0.002146 |
| 75_c9-1 | 75 | EGFR                        | MODERATE           | c.1159C>G                                                                                                            | p.Leu387Val                                                | 1 | FALSE | chr7:5522<br>4477:C:G  | 116:chr7:5<br>5224477:C<br>:G  | 0.001899 |
| 75_c9-1 | 75 | NF1                         | MODIFIER; HIGH     | c.*2165C><br>T;<br>c.2266C>T                                                                                         | p.Gln756*                                                  | 2 | FALSE | chr17:295<br>54250:C:T | 116:chr17:<br>29554250:<br>C:T | 0.002222 |

|         |    |                    |                    |                                                           |                                                                         |     |       |                        |                                |          |
|---------|----|--------------------|--------------------|-----------------------------------------------------------|-------------------------------------------------------------------------|-----|-------|------------------------|--------------------------------|----------|
| 75_c9-1 | 75 | C9orf53;<br>CDKN2A | MODIFIER; MODERATE | n.*616C>G<br>;<br>c.*140G>C<br>;<br>c.217G>C;<br>c.260G>C | p.Ala73Pro;<br>p.Arg87Pro                                               | 1   | FALSE | chr9:2197<br>1141:C:G  | 116:chr9:2<br>1971141:C<br>:G  | 0.011662 |
| 75_c9-1 | 75 | TP53               | MODERATE           | c.340C>T;<br>c.421C>T;<br>c.700C>T;<br>c.817C>T           | p.Arg114Cys<br>;<br>p.Arg141Cys<br>;<br>p.Arg234Cys<br>;<br>p.Arg273Cys | 601 | FALSE | chr17:757<br>7121:G:A  | 116:chr17:<br>7577121:G<br>:A  | 0.002309 |
| 75_c9-1 | 75 | DDR2               | HIGH               | c.2125C>T                                                 | p.Arg709*                                                               | 4   | FALSE | chr1:1627<br>46002:C:T | 116:chr1:1<br>62746002:<br>C:T | 0.001883 |
| 75_c9-1 | 75 | EPHA3              | MODERATE           | c.1280C>T                                                 | p.Ala427Val                                                             | 0   | FALSE | chr3:8939<br>1214:C:T  | 116:chr3:8<br>9391214:C<br>:T  | 0.002169 |
| 75_c9-1 | 75 | EPHA3              | MODERATE           | c.1916G>A                                                 | p.Arg639His                                                             | 0   | FALSE | chr3:8946<br>8382:G:A  | 116:chr3:8<br>9468382:G<br>:A  | 0.002639 |
| 75_c9-1 | 75 | ALK                | MODERATE           | c.3599C>T                                                 | p.Ala1200Val                                                            | 2   | FALSE | chr2:2944<br>3618:G:A  | 116:chr2:2<br>9443618:G<br>:A  | 0.003745 |
| 75_c9-1 | 75 | NOTCH1             | MODERATE           | c.4906G>A                                                 | p.Glu1636Lys                                                            | 0   | FALSE | chr9:1393<br>99237:C:T | 116:chr9:1<br>39399237:<br>C:T | 0.0025   |
| 75_c9-1 | 75 | TP53               | MODERATE           | c.389T>C;<br>c.470T>C;<br>c.749T>C;<br>c.866T>C           | p.Leu130Pro<br>;<br>p.Leu157Pro<br>;<br>p.Leu250Pro<br>;<br>p.Leu289Pro | 2   | FALSE | chr17:757<br>7072:A:G  | 116:chr17:<br>7577072:A<br>:G  | 0.002139 |
| 75_c9-1 | 75 | MITF               | MODERATE           | c.127A>C;<br>c.235A>C;<br>c.280A>C;<br>c.283A>C           | p.Thr43Pro;<br>p.Thr79Pro;<br>p.Thr94Pro;<br>p.Thr95Pro                 | 0   | FALSE | chr3:6992<br>8463:A:C  | 116:chr3:6<br>9928463:A<br>:C  | 0.201653 |
| 75_c9-1 | 75 | NF1                | MODERATE           | c.2695T>G                                                 | p.Leu899Val                                                             | 3   | FALSE | chr17:295<br>56328:T:G | 116:chr17:<br>29556328:<br>T:G | 0.042117 |
| 75_c9-1 | 75 | IGF1R              | MODERATE           | c.3934T>C;<br>c.3937T>C                                   | p.Ser1312Pro;<br>p.Ser1313Pro                                           | 0   | FALSE | chr15:995<br>00504:T:C | 116:chr15:<br>99500504:<br>T:C | 0.064242 |
| 75_c9-1 | 75 | ALK                | MODERATE           | c.3182G>A                                                 | p.Arg1061Gln                                                            | 3   | FALSE | chr2:2944<br>6385:C:T  | 116:chr2:2<br>9446385:C<br>:T  | 0.001727 |

|         |    |                    |                            |                                                                               |                                                                         |   |       |                             |                                 |          |
|---------|----|--------------------|----------------------------|-------------------------------------------------------------------------------|-------------------------------------------------------------------------|---|-------|-----------------------------|---------------------------------|----------|
| 75_c9-1 | 75 | C9orf53;<br>CDKN2A | MODIFIER; MODERATE;<br>LOW | n.*616G>A<br>;<br>c.*180C>T;<br>c.257C>T;<br>c.300C>T                         | p.Ala86Val;<br>p.Cys100Cys                                              | 1 | FALSE | chr9:2197<br>1101:G:A       | 116:chr9:2<br>1971101:G<br>:A   | 0.002404 |
| 75_c9-1 | 75 | FGFR3              | MODERATE                   | c.1133A>G<br>;<br>c.1469A>G<br>;<br>c.1475A>G                                 | p.Glu378Gly<br>;<br>p.Glu490Gly<br>;<br>p.Glu492Gly                     | 1 | FALSE | chr4:1807<br>138:A:G        | 116:chr4:1<br>807138:A:<br>G    | 0.002793 |
| 75_c9-1 | 75 | CDKN2A             | MODIFIER; MODERATE         | c.194-<br>3568A>C;<br>c.52A>C                                                 | p.Thr18Pro                                                              | 1 | FALSE | chr9:2197<br>4775:T:G       | 116:chr9:2<br>1974775:T<br>:G   | 0.07069  |
| 75_c9-1 | 75 | SMO                | MODERATE                   | c.1045A>C                                                                     | p.Thr349Pro                                                             | 0 | FALSE | chr7:1288<br>46115:A:C      | 116:chr7:1<br>28846115:<br>A:C  | 0.039583 |
| 75_c9-1 | 75 | IGF1R              | MODERATE                   | c.3905T>C;<br>c.3908T>C                                                       | p.Val1302Al<br>a;<br>p.Val1303Al<br>a                                   | 0 | FALSE | chr15:995<br>00475:T:C      | 116:chr15:<br>99500475:<br>T:C  | 0.012081 |
| 75_c9-1 | 75 | FGFR3              | MODERATE                   | c.539G>A                                                                      | p.Gly180Asp                                                             | 1 | FALSE | chr4:1803<br>187:G:A        | 116:chr4:1<br>803187:G:<br>A    | 0.002242 |
| 75_c9-1 | 75 | PTEN               | MODERATE                   | c.355G>A                                                                      | p.Val119Ile                                                             | 3 | FALSE | chr10:896<br>92871:G:A      | 116:chr10:<br>89692871:<br>G:A  | 0.001927 |
| 75_c9-1 | 75 | C9orf53;<br>CDKN2A | MODIFIER; MODERATE;<br>LOW | n.*616T>G<br>;<br>c.*120A>C<br>;<br>c.197A>C;<br>c.240A>C                     | p.His66Pro;<br>p.Pro80Pro                                               | 1 | FALSE | chr9:2197<br>1161:T:G       | 116:chr9:2<br>1971161:T<br>:G   | 0.106267 |
| 75_c9-1 | 75 | FGFR4              | MODERATE                   | c.461G>A                                                                      | p.Arg154His                                                             | 3 | FALSE | chr5:1765<br>17963:G:A      | 116:chr5:1<br>76517963:<br>G:A  | 0.001944 |
| 75_c9-1 | 75 | ATM                | MODERATE                   | c.1009C>T                                                                     | p.Arg337Cys                                                             | 0 | FALSE | chr11:108<br>117798:C:<br>T | 116:chr11:<br>10811779<br>8:C:T | 0.001994 |
| 75_c9-1 | 75 | RET                | MODERATE                   | c.1690A>C                                                                     | p.Thr564Pro                                                             | 1 | FALSE | chr10:436<br>08342:A:C      | 116:chr10:<br>43608342:<br>A:C  | 0.068256 |
| 75_c9-1 | 75 | TP53               | MODIFIER; MODERATE         | c.*145T>C;<br>c.*233T>C;<br>c.1009T>C;<br>c.1126T>C;<br>c.649T>C;<br>c.730T>C | p.Ser337Pro<br>;<br>p.Ser376Pro<br>;<br>p.Ser217Pro<br>;<br>p.Ser244Pro | 2 | FALSE | chr17:757<br>2983:A:G       | 116:chr17:<br>7572983:A<br>:G   | 0.011686 |
| 75_c9-1 | 75 | FLT3               | HIGH                       | c.2500C>T                                                                     | p.Arg834*                                                               | 0 | FALSE | chr13:285<br>92645:G:A      | 116:chr13:<br>28592645:<br>G:A  | 0.002148 |



|         |    |        |                    |                                                                                                                                                           |                                                                                                                                                              |   |       |                             |                                 |          |
|---------|----|--------|--------------------|-----------------------------------------------------------------------------------------------------------------------------------------------------------|--------------------------------------------------------------------------------------------------------------------------------------------------------------|---|-------|-----------------------------|---------------------------------|----------|
| 75_c9-1 | 75 | NTRK1  | MODERATE           | c.1940T>G<br>;<br>c.2030T>G<br>;<br>c.2048T>G                                                                                                             | p.Val647Gly;<br>p.Val677Gly;<br>p.Val683Gly                                                                                                                  | 2 | FALSE | chr1:1568<br>49792:T:G      | 116:chr1:1<br>56849792:<br>T:G  | 0.030132 |
| 80_c5-1 | 80 | IGF1R  | MODERATE           | c.3934T>C;<br>c.3937T>C                                                                                                                                   | p.Ser1312Pro;<br>p.Ser1313Pro                                                                                                                                | 0 | FALSE | chr15:995<br>00504:T:C      | 117:chr15:<br>99500504:<br>T:C  | 0.041743 |
| 80_c5-1 | 80 | ERBB2  | MODERATE; MODIFIER | c.379C>T;<br>c.424C>T;<br>c.469C>T;<br>n.793C>T                                                                                                           | p.Arg127Trp<br>;<br>p.Arg142Trp<br>;<br>p.Arg157Trp<br>;                                                                                                     | 1 | FALSE | chr17:378<br>65600:C:T      | 117:chr17:<br>37865600:<br>C:T  | 0.00114  |
| 80_c5-1 | 80 | CDKN2A | MODIFIER; MODERATE | c.194-<br>3570C>G;<br>c.50C>G                                                                                                                             | p.Ala17Gly                                                                                                                                                   | 1 | FALSE | chr9:2197<br>4777:G:C       | 117:chr9:2<br>1974777:G<br>:C   | 0.01223  |
| 80_c5-1 | 80 | CDH1   | MODERATE           | c.221G>A                                                                                                                                                  | p.Arg74Gln                                                                                                                                                   | 0 | FALSE | chr16:688<br>35630:G:A      | 117:chr16:<br>68835630:<br>G:A  | 0.001112 |
| 80_c5-1 | 80 | HGF    | MODERATE           | c.767G>A;<br>c.782G>A                                                                                                                                     | p.Arg256His<br>;<br>p.Arg261His                                                                                                                              | 0 | FALSE | chr7:8137<br>2752:C:T       | 117:chr7:8<br>1372752:C<br>:T   | 0.001352 |
| 80_c5-1 | 80 | EGFR   | MODERATE           | c.967G>A                                                                                                                                                  | p.Val323Ile                                                                                                                                                  | 2 | FALSE | chr7:5522<br>3600:G:A       | 117:chr7:5<br>5223600:G<br>:A   | 0.001898 |
| 80_c5-1 | 80 | PDGFRA | MODERATE           | c.1777C>A                                                                                                                                                 | p.Leu593Ile                                                                                                                                                  | 1 | FALSE | chr4:5514<br>1131:C:A       | 117:chr4:5<br>5141131:C<br>:A   | 0.001965 |
| 80_c5-1 | 80 | SMO    | MODERATE           | c.1045A>C                                                                                                                                                 | p.Thr349Pro                                                                                                                                                  | 0 | FALSE | chr7:1288<br>46115:A:C      | 117:chr7:1<br>28846115:<br>A:C  | 0.041211 |
| 80_c5-1 | 80 | BRAF   | MODERATE           | c.946T>C                                                                                                                                                  | p.Ser316Pro                                                                                                                                                  | 1 | FALSE | chr7:1405<br>00196:A:G      | 117:chr7:1<br>40500196:<br>A:G  | 0.002994 |
| 80_c5-1 | 80 | FGFR2  | MODERATE; MODIFIER | c.1281C>A<br>;<br>c.1284C>A<br>;<br>c.1287C>A<br>;<br>c.1296C>A<br>;<br>c.1365C>A<br>;<br>c.1368C>A<br>;<br>c.1632C>A<br>;<br>c.1635C>A<br>;<br>n.2082C>A | p.His427Gln<br>;<br>p.His428Gln<br>;<br>p.His429Gln<br>;<br>p.His432Gln<br>;<br>p.His455Gln<br>;<br>p.His456Gln<br>;<br>p.His544Gln<br>;<br>p.His545Gln<br>; | 1 | FALSE | chr10:123<br>258049:G:<br>T | 117:chr10:<br>12325804<br>9:G:T | 0.001571 |
| 80_c5-1 | 80 | CTNNB1 | MODERATE           | c.1972G>T                                                                                                                                                 | p.Val658Phe                                                                                                                                                  | 0 | FALSE | chr3:4127<br>8096:G:T       | 117:chr3:4<br>1278096:G<br>:T   | 0.004528 |

|         |    |                             |                    |                                                                                                |                                                                                                                 |   |       |                        |                                |          |
|---------|----|-----------------------------|--------------------|------------------------------------------------------------------------------------------------|-----------------------------------------------------------------------------------------------------------------|---|-------|------------------------|--------------------------------|----------|
| 80_c5-1 | 80 | APC                         | MODERATE           | c.1864C>T;<br>; c.1918C>T                                                                      | p.Arg622Trp<br>; p.Arg640Trp                                                                                    | 0 | FALSE | chr5:1121<br>70822:C:T | 117:chr5:1<br>12170822:<br>C:T | 0.001701 |
| 80_c5-1 | 80 | ALK                         | MODERATE           | c.2575G>C                                                                                      | p.Glu859Gln                                                                                                     | 1 | FALSE | chr2:2945<br>5227:C:G  | 117:chr2:2<br>9455227:C<br>:G  | 0.001227 |
| 80_c5-1 | 80 | IGF1R                       | MODERATE           | c.3905T>C;<br>c.3908T>C                                                                        | p.Val1302Ala<br>; p.Val1303Ala                                                                                  | 0 | FALSE | chr15:995<br>00475:T:C | 117:chr15:<br>99500475:<br>T:C | 0.020861 |
| 80_c5-1 | 80 | ERBB2;<br>MIEN1;<br>MIR4728 | MODERATE; MODIFIER | c.3025G>A<br>;<br>c.3070G>A<br>;<br>c.3115G>A<br>;<br>n.3439G>A<br>;<br>c.*388C>T;<br>n.*67G>A | p.Ala1009Thr<br>;<br>p.Ala1024Thr<br>;<br>p.Ala1039Thr                                                          | 2 | FALSE | chr17:378<br>83212:G:A | 117:chr17:<br>37883212:<br>G:A | 0.001626 |
| 80_c5-1 | 80 | KDR                         | MODERATE           | c.583G>T                                                                                       | p.Ala195Ser                                                                                                     | 1 | FALSE | chr4:5598<br>1116:C:A  | 117:chr4:5<br>5981116:C<br>:A  | 0.001048 |
| 80_c5-1 | 80 | NTRK2                       | MODERATE           | c.220G>A                                                                                       | p.Ala74Thr                                                                                                      | 0 | FALSE | chr9:8731<br>7081:G:A  | 117:chr9:8<br>7317081:G<br>:A  | 0.001477 |
| 80_c5-1 | 80 | TP53                        | MODERATE; MODIFIER | c.199C>T;<br>c.82C>T; c.-<br>279C>T; c.-<br>360C>T                                             | p.Pro67Ser;<br>p.Pro28Ser;                                                                                      | 3 | FALSE | chr17:757<br>9488:G:A  | 117:chr17:<br>7579488:G<br>:A  | 0.002425 |
| 80_c5-1 | 80 | FGFR1                       | MODERATE           | c.1060C>T;<br>c.1066C>T;<br>c.1303C>T;<br>c.1327C>T;<br>c.1333C>T;<br>c.1426C>T                | p.Arg354Trp<br>;<br>p.Arg356Trp<br>;<br>p.Arg435Trp<br>;<br>p.Arg443Trp<br>;<br>p.Arg445Trp<br>;<br>p.Arg476Trp | 2 | FALSE | chr8:3827<br>5843:G:A  | 117:chr8:3<br>8275843:G<br>:A  | 0.000996 |
| 80_c5-1 | 80 | NTRK1                       | MODERATE           | c.728G>A;<br>c.818G>A                                                                          | p.Arg243Gln<br>;<br>p.Arg273Gln                                                                                 | 1 | FALSE | chr1:1568<br>41515:G:A | 117:chr1:1<br>56841515:<br>G:A | 0.00122  |
| 80_c5-1 | 80 | PIK3R1                      | MODERATE           | c.1694G>A<br>;<br>c.605G>A;<br>c.794G>A;<br>c.884G>A                                           | p.Ser565Asn<br>;<br>p.Ser202Asn<br>;<br>p.Ser265Asn<br>;<br>p.Ser295Asn                                         | 1 | FALSE | chr5:6759<br>1101:G:A  | 117:chr5:6<br>7591101:G<br>:A  | 0.001145 |

|         |    |                             |                    |                                                                                                |                                                          |   |       |                             |                                 |          |
|---------|----|-----------------------------|--------------------|------------------------------------------------------------------------------------------------|----------------------------------------------------------|---|-------|-----------------------------|---------------------------------|----------|
| 80_c5-1 | 80 | NF1                         | MODERATE           | c.2659G>A                                                                                      | p.Ala887Thr                                              | 1 | FALSE | chr17:295<br>56292:G:A      | 117:chr17:<br>29556292:<br>G:A  | 0.001077 |
| 80_c5-1 | 80 | NTRK1                       | MODERATE           | c.1940T>G<br>;<br>c.2030T>G<br>;<br>c.2048T>G                                                  | p.Val647Gly;<br>p.Val677Gly;<br>p.Val683Gly              | 2 | FALSE | chr1:1568<br>49792:T:G      | 117:chr1:1<br>56849792:<br>T:G  | 0.031293 |
| 80_c5-1 | 80 | CWH43                       | MODERATE           | c.737C>T;<br>c.818C>T                                                                          | p.Ala246Val;<br>p.Ala273Val                              | 0 | FALSE | chr4:4900<br>5767:C:T       | 117:chr4:4<br>9005767:C<br>:T   | 0.001276 |
| 80_c5-1 | 80 | BRAF                        | MODERATE           | c.1061G>A                                                                                      | p.Arg354Gln                                              | 3 | FALSE | chr7:1404<br>94187:C:T      | 117:chr7:1<br>40494187:<br>C:T  | 0.001164 |
| 80_c5-1 | 80 | CDH1                        | MODERATE           | c.1528G>A                                                                                      | p.Ala510Thr                                              | 0 | FALSE | chr16:688<br>49625:G:A      | 117:chr16:<br>68849625:<br>G:A  | 0.001119 |
| 80_c5-1 | 80 | PTEN                        | MODERATE           | c.235G>A                                                                                       | p.Ala79Thr                                               | 3 | FALSE | chr10:896<br>90828:G:A      | 117:chr10:<br>89690828:<br>G:A  | 0.001376 |
| 80_c5-1 | 80 | KDR                         | MODERATE           | c.2323G>T                                                                                      | p.Ala775Ser                                              | 1 | FALSE | chr4:5596<br>4914:C:A       | 117:chr4:5<br>5964914:C<br>:A   | 0.008537 |
| 80_c5-1 | 80 | ERBB2;<br>MIEN1;<br>MIR4728 | MODERATE; MODIFIER | c.2607C>A<br>;<br>c.2652C>A<br>;<br>c.2697C>A<br>;<br>n.3021C>A<br>;<br>c.*388G>T<br>; n.-1C>A | p.Phe869Le<br>u;<br>p.Phe884Le<br>u;<br>p.Phe899Le<br>u; | 1 | FALSE | chr17:378<br>81627:C:A      | 117:chr17:<br>37881627:<br>C:A  | 0.002041 |
| 80_c5-1 | 80 | CDKN2A;<br>CDKN2B-<br>AS1   | MODERATE; MODIFIER | c.22A>G;<br>n.-1T>C                                                                            | p.Thr8Ala;                                               | 1 | FALSE | chr9:2199<br>4309:T:C       | 117:chr9:2<br>1994309:T<br>:C   | 0.008322 |
| 80_c5-1 | 80 | RET                         | MODERATE           | c.1690A>C                                                                                      | p.Thr564Pro                                              | 1 | FALSE | chr10:436<br>08342:A:C      | 117:chr10:<br>43608342:<br>A:C  | 0.052878 |
| 80_c5-1 | 80 | EGFR;<br>EGFR-AS1           | MODIFIER; MODERATE | c.*2364G><br>A;<br>c.2224G>A<br>;<br>n.*2821C><br>T                                            | ; p.Val742Ile                                            | 2 | FALSE | chr7:5524<br>2454:G:A       | 117:chr7:5<br>5242454:G<br>:A   | 0.001813 |
| 80_c5-1 | 80 | MITF                        | MODERATE           | c.127A>C;<br>c.235A>C;<br>c.280A>C;<br>c.283A>C                                                | p.Thr43Pro;<br>p.Thr79Pro;<br>p.Thr94Pro;<br>p.Thr95Pro  | 0 | FALSE | chr3:6992<br>8463:A:C       | 117:chr3:6<br>9928463:A<br>:C   | 0.140162 |
| 80_c5-1 | 80 | AKT1                        | MODERATE           | c.361C>T                                                                                       | p.Arg121Trp                                              | 2 | FALSE | chr14:105<br>242063:G:<br>A | 117:chr14:<br>10524206<br>3:G:A | 0.001187 |

|         |    |                             |                            |                                                                               |                                                                                             |   |       |                    |                        |          |
|---------|----|-----------------------------|----------------------------|-------------------------------------------------------------------------------|---------------------------------------------------------------------------------------------|---|-------|--------------------|------------------------|----------|
| 80_c5-1 | 80 | EPHA3                       | MODERATE                   | c.2222G>A                                                                     | p.Gly741Asp                                                                                 | 0 | FALSE | chr3:89480385:G:A  | 117:chr3:89480385:G:A  | 0.001385 |
| 80_c5-1 | 80 | NF1                         | MODERATE                   | c.6943G>A;<br>c.7006G>A                                                       | p.Ala2315Thr;<br>p.Ala2336Thr                                                               | 2 | FALSE | chr17:29667607:G:A | 117:chr17:29667607:G:A | 0.001206 |
| 80_c5-1 | 80 | NOTCH1                      | MODERATE                   | c.4906G>A                                                                     | p.Glu1636Lys                                                                                | 0 | FALSE | chr9:139399237:C:T | 117:chr9:139399237:C:T | 0.00136  |
| 80_c5-1 | 80 | CTNNB1                      | MODERATE                   | c.1346G>A                                                                     | p.Arg449His                                                                                 | 0 | FALSE | chr3:41275180:G:A  | 117:chr3:41275180:G:A  | 0.001519 |
| 80_c5-1 | 80 | FGFR1                       | MODERATE                   | c.1013C>T;<br>c.1019C>T;<br>c.1112C>T;<br>c.746C>T;<br>c.752C>T;<br>c.995C>T  | p.Thr338Met;<br>p.Thr340Met;<br>p.Thr371Met;<br>p.Thr249Met;<br>p.Thr251Met;<br>p.Thr332Met | 2 | FALSE | chr8:38279377:G:A  | 117:chr8:38279377:G:A  | 0.002154 |
| 80_c5-1 | 80 | STK11                       | MODERATE                   | c.628T>C                                                                      | p.Cys210Arg                                                                                 | 1 | FALSE | chr19:1220610:T:C  | 117:chr19:1220610:T:C  | 0.007951 |
| 80_c5-1 | 80 | C9orf53;<br>CDKN2A          | MODIFIER; MODERATE;<br>LOW | n.*616C>T;<br>c.*258G>A;<br>c.335G>A;<br>c.378G>A                             | p.Arg112His;<br>p.Pro126Pro                                                                 | 1 | FALSE | chr9:21971023:C:T  | 117:chr9:21971023:C:T  | 0.001348 |
| 80_c5-1 | 80 | ERBB2;<br>MIEN1;<br>MIR4728 | MODERATE; MODIFIER         | c.2516T>G;<br>c.2561T>G;<br>c.2606T>G;<br>n.2930T>G;<br>c.*388A>C;<br>n.-1T>G | p.Leu839Arg;<br>p.Leu854Arg;<br>p.Leu869Arg                                                 | 1 | FALSE | chr17:37881414:T:G | 117:chr17:37881414:T:G | 0.001249 |
| 80_c5-1 | 80 | IGF1R                       | MODERATE                   | c.3121C>T;<br>c.3124C>T                                                       | p.Arg1041Cys;<br>p.Arg1042Cys                                                               | 0 | FALSE | chr15:99478220:C:T | 117:chr15:99478220:C:T | 0.001688 |
| 80_c5-1 | 80 | ALG10                       | MODERATE                   | c.272G>A                                                                      | p.Cys91Tyr                                                                                  | 0 | FALSE | chr12:34176997:G:A | 117:chr12:34176997:G:A | 0.001755 |

|         |    |                    |                    |                                                                           |                                                                                                                 |   |       |                        |                                |          |
|---------|----|--------------------|--------------------|---------------------------------------------------------------------------|-----------------------------------------------------------------------------------------------------------------|---|-------|------------------------|--------------------------------|----------|
| 80_c5-1 | 80 | FGFR1              | MODERATE           | c.487C>T;<br>c.493C>T;<br>c.736C>T;<br>c.754C>T;<br>c.760C>T;<br>c.853C>T | p.Arg163Trp<br>;<br>p.Arg165Trp<br>;<br>p.Arg246Trp<br>;<br>p.Arg252Trp<br>;<br>p.Arg254Trp<br>;<br>p.Arg285Trp | 1 | FALSE | chr8:3828<br>2203:G:A  | 117:chr8:3<br>8282203:G<br>:A  | 0.0012   |
| 80_c5-1 | 80 | NTRK1              | MODERATE           | c.804C>G;<br>c.894C>G                                                     | p.His268Gln<br>;<br>p.His298Gln                                                                                 | 1 | FALSE | chr1:1568<br>43468:C:G | 117:chr1:1<br>56843468:<br>C:G | 0.001516 |
| 80_c5-1 | 80 | CTNNB1             | MODERATE           | c.445G>A                                                                  | p.Ala149Thr                                                                                                     | 0 | FALSE | chr3:4126<br>6648:G:A  | 117:chr3:4<br>1266648:G<br>:A  | 0.001239 |
| 80_c5-1 | 80 | FGFR3              | MODERATE           | c.1526G>A<br>;<br>c.1862G>A<br>;<br>c.1868G>A                             | p.Arg509His<br>;<br>p.Arg621His<br>;<br>p.Arg623His                                                             | 2 | FALSE | chr4:1807<br>803:G:A   | 117:chr4:1<br>807803:G:<br>A   | 0.001622 |
| 80_c5-1 | 80 | CDH1               | MODERATE           | c.760G>A                                                                  | p.Asp254As<br>n                                                                                                 | 0 | FALSE | chr16:688<br>44172:G:A | 117:chr16:<br>68844172:<br>G:A | 0.001183 |
| 80_c5-1 | 80 | NF1                | MODERATE           | c.2695T>G                                                                 | p.Leu899Val                                                                                                     | 3 | FALSE | chr17:295<br>56328:T:G | 117:chr17:<br>29556328:<br>T:G | 0.046036 |
| 80_c5-1 | 80 | CDH1               | MODERATE           | c.2074G>A                                                                 | p.Ala692Thr                                                                                                     | 0 | FALSE | chr16:688<br>57439:G:A | 117:chr16:<br>68857439:<br>G:A | 0.001788 |
| 80_c5-1 | 80 | MET                | MODERATE           | c.3217C>T;<br>c.3271C>T                                                   | p.Pro1073Se<br>r;<br>p.Pro1091Se<br>r                                                                           | 1 | FALSE | chr7:1164<br>15123:C:T | 117:chr7:1<br>16415123:<br>C:T | 0.001252 |
| 80_c5-1 | 80 | NOTCH1             | MODERATE           | c.3749G>A                                                                 | p.Gly1250As<br>p                                                                                                | 0 | FALSE | chr9:1394<br>01320:C:T | 117:chr9:1<br>39401320:<br>C:T | 0.001558 |
| 80_c5-1 | 80 | FLT3               | MODERATE           | c.2678C>T                                                                 | p.Pro893Leu                                                                                                     | 0 | FALSE | chr13:285<br>89369:G:A | 117:chr13:<br>28589369:<br>G:A | 0.001244 |
| 80_c5-1 | 80 | TP53               | MODERATE; MODIFIER | c.208G>A;<br>c.91G>A; c.<br>279G>A; c.<br>360G>A                          | p.Ala70Thr;<br>p.Ala31Thr;                                                                                      | 1 | FALSE | chr17:757<br>9479:C:T  | 117:chr17:<br>7579479:C<br>:T  | 0.001664 |
| 80_c5-1 | 80 | CDKN2A             | MODIFIER; MODERATE | c.194-<br>3568A>C;<br>c.52A>C                                             | ; p.Thr18Pro                                                                                                    | 1 | FALSE | chr9:2197<br>4775:T:G  | 117:chr9:2<br>1974775:T<br>:G  | 0.061127 |
| 80_c5-1 | 80 | MIR4673;<br>NOTCH1 | MODIFIER; MODERATE | n.*59A>C;<br>c.1195A>C                                                    | ; p.Thr399Pro                                                                                                   | 0 | FALSE | chr9:1394<br>12649:T:G | 117:chr9:1<br>39412649:<br>T:G | 0.011811 |
| 80_c5-1 | 80 | CWH43              | MODERATE           | c.692G>A;<br>c.773G>A                                                     | p.Arg231His<br>;<br>p.Arg258His                                                                                 | 0 | FALSE | chr4:4900<br>0536:G:A  | 117:chr4:4<br>9000536:G<br>:A  | 0.001142 |

|         |    |                    |                            |                                                |                                            |    |       |                    |                        |          |
|---------|----|--------------------|----------------------------|------------------------------------------------|--------------------------------------------|----|-------|--------------------|------------------------|----------|
| 80_c5-1 | 80 | TSC2               | MODERATE                   | c.2035G>A                                      | p.Val679Met                                | 0  | FALSE | chr16:2121873:G:A  | 117:chr16:2121873:G:A  | 0.001807 |
| 80_c5-1 | 80 | ALK                | MODERATE                   | c.4192C>T                                      | p.Pro1398Ser                               | 1  | FALSE | chr2:29416761:G:A  | 117:chr2:29416761:G:A  | 0.001366 |
| 80_c5-1 | 80 | EGFR;<br>EGFR-AS1  | MODERATE; MODIFIER         | c.2336G>A;<br>n.1226C>T                        | p.Gly779Asp                                | 2  | FALSE | chr7:55249038:G:A  | 117:chr7:55249038:G:A  | 0.001162 |
| 80_c5-1 | 80 | CDKN2A             | MODIFIER; MODERATE         | c.194-3537T>G;<br>c.83T>G                      | p.Val28Gly                                 | 1  | FALSE | chr9:21974744:A:C  | 117:chr9:21974744:A:C  | 0.066259 |
| 80_c5-1 | 80 | TSC1               | MODERATE                   | c.457C>T;<br>c.610C>T                          | p.Arg153Cys;<br>p.Arg204Cys                | 0  | FALSE | chr9:135797259:G:A | 117:chr9:135797259:G:A | 0.002028 |
| 80_c5-1 | 80 | KDR                | HIGH                       | c.2455C>T                                      | p.Arg819*                                  | 2  | FALSE | chr4:55964358:G:A  | 117:chr4:55964358:G:A  | 0.001155 |
| 80_c5-1 | 80 | HOXD-AS2;<br>HOXD8 | MODIFIER; MODERATE         | n.*692C>T;<br>c.-123-177G>A;<br>c.253G>A       | p.Gly85Ser                                 | 0  | FALSE | chr2:176995347:G:A | 117:chr2:176995347:G:A | 0.005464 |
| 80_c5-1 | 80 | EGFR;<br>EGFR-AS1  | MODERATE; MODIFIER         | c.2507G>A;<br>n.-1C>T                          | p.Arg836His                                | 2  | FALSE | chr7:55259449:G:A  | 117:chr7:55259449:G:A  | 0.00136  |
| 80_c5-1 | 80 | EGFR;<br>EGFR-AS1  | MODERATE; MODIFIER         | c.2568T>G;<br>n.-1A>C                          | p.Phe856Leu                                | 1  | FALSE | chr7:55259510:T:G  | 117:chr7:55259510:T:G  | 0.001913 |
| 80_c5-1 | 80 | EPHA3              | MODERATE                   | c.1543G>A                                      | p.Ala515Thr                                | 0  | FALSE | chr3:89448579:G:A  | 117:chr3:89448579:G:A  | 0.001279 |
| 80_c5-1 | 80 | TP53               | MODIFIER; HIGH             | c.-48C>T;<br>c.313C>T;<br>c.34C>T;<br>c.430C>T | p.Gln105*;<br>p.Gln12*;<br>p.Gln144*       | 42 | FALSE | chr17:7578500:G:A  | 117:chr17:7578500:G:A  | 0.001279 |
| 80_c5-1 | 80 | TSC2               | MODERATE                   | c.2702G>A                                      | p.Arg901His                                | 0  | FALSE | chr16:2126131:G:A  | 117:chr16:2126131:G:A  | 0.001196 |
| 80_c5-1 | 80 | FGFR4              | HIGH                       | c.1041G>A                                      | p.Trp347*                                  | 1  | FALSE | chr5:176519769:G:A | 117:chr5:176519769:G:A | 0.001574 |
| 80_c5-1 | 80 | TP53               | LOW; MODIFIER;<br>MODERATE | c.-6C>T;<br>c.355C>T;<br>c.472C>T;<br>c.76C>T  | p.Arg119Cys;<br>p.Arg158Cys;<br>p.Arg26Cys | 17 | FALSE | chr17:7578458:G:A  | 117:chr17:7578458:G:A  | 0.001966 |
| 80_c5-1 | 80 | IDH2               | MODERATE                   | c.172C>T;<br>c.406C>T;<br>c.562C>T             | p.Arg58Trp;<br>p.Arg136Trp;<br>p.Arg188Trp | 1  | FALSE | chr15:90631707:G:A | 117:chr15:90631707:G:A | 0.001958 |

|         |    |                           |                            |                                                                                                                        |                                                                                             |     |       |                        |                                |          |
|---------|----|---------------------------|----------------------------|------------------------------------------------------------------------------------------------------------------------|---------------------------------------------------------------------------------------------|-----|-------|------------------------|--------------------------------|----------|
| 80_c5-1 | 80 | MIR1225;<br>PKD1;<br>TSC2 | MODIFIER; MODERATE         | n.*90C>T;<br>c.*13118C<br>>T;<br>c.*13121C<br>>T;<br>c.4906G>A<br>;<br>c.5038G>A<br>;<br>c.5107G>A                     | p.Val1636M<br>et;<br>p.Val1680M<br>et;<br>p.Val1703M<br>et                                  | 0   | FALSE | chr16:213<br>8087:G:A  | 117:chr16:<br>2138087:G<br>:A  | 0.001295 |
| 86_bl-1 | 86 | PIK3CA                    | MODERATE                   | c.1624G>A                                                                                                              | p.Glu542Lys                                                                                 | 777 | FALSE | chr3:1789<br>36082:G:A | 118:chr3:1<br>78936082:<br>G:A | 0.002543 |
| 86_bl-1 | 86 | FGFR1                     | LOW; MODIFIER;<br>MODERATE | c.-19C>T;<br>c.173C>T;<br>c.74C>T                                                                                      | p.Pro58Leu;<br>p.Pro25Leu                                                                   | 1   | FALSE | chr8:3831<br>4891:G:A  | 118:chr8:3<br>8314891:G<br>:A  | 0.000379 |
| 86_bl-1 | 86 | CSDE1;<br>NRAS            | MODIFIER; MODERATE         | c.*2430A><br>C;<br>c.*2523A><br>C;<br>c.*2817A><br>C;<br>c.*2910A><br>C;<br>c.*2964A><br>C;<br>c.*3057A><br>C; c.48A>C | p.Lys16Asn                                                                                  | 1   | FALSE | chr1:1152<br>58734:T:G | 118:chr1:1<br>15258734:<br>T:G | 0.000946 |
| 86_bl-1 | 86 | FGFR1                     | MODERATE                   | c.1048G>A<br>;<br>c.1066G>A<br>;<br>c.1072G>A<br>;<br>c.1165G>A<br>;<br>c.799G>A;<br>c.805G>A                          | p.Val350Ile;<br>p.Val356Ile;<br>p.Val358Ile;<br>p.Val389Ile;<br>p.Val267Ile;<br>p.Val269Ile | 1   | FALSE | chr8:3827<br>9324:C:T  | 118:chr8:3<br>8279324:C<br>:T  | 0.000816 |
| 86_bl-1 | 86 | TSC2                      | MODERATE                   | c.3410C>T;<br>c.3542C>T                                                                                                | p.Thr1137M<br>et;<br>p.Thr1181M<br>et                                                       | 0   | FALSE | chr16:213<br>0310:C:T  | 118:chr16:<br>2130310:C<br>:T  | 0.002254 |
| 86_bl-1 | 86 | CDKN2A                    | MODIFIER; HIGH             | c.194-<br>3575G>A;<br>c.45G>A                                                                                          | p.Trp15*                                                                                    | 3   | FALSE | chr9:2197<br>4782:C:T  | 118:chr9:2<br>1974782:C<br>:T  | 0.001986 |

|         |    |                             |                    |                                                                                                   |                                                                         |   |       |                        |                                |          |
|---------|----|-----------------------------|--------------------|---------------------------------------------------------------------------------------------------|-------------------------------------------------------------------------|---|-------|------------------------|--------------------------------|----------|
| 86_bl-1 | 86 | ERBB2;<br>MIEN1;<br>MIR4728 | MODERATE; MODIFIER | c.2239G>C<br>;<br>c.2284G>C<br>;<br>c.2329G>C<br>;<br>n.2653G>C<br>;<br>c.*388C>G<br>;n.-1G>C     | p.Val747Leu<br>;<br>p.Val762Leu<br>;<br>p.Val777Leu<br>;                | 9 | FALSE | chr17:378<br>81000:G:C | 118:chr17:<br>37881000:<br>G:C | 0.028913 |
| 86_bl-1 | 86 | GAPDH;<br>IFFO1             | MODERATE; MODIFIER | c.773G>A;<br>c.899G>A;<br>c.*1743C><br>T;<br>c.*1746C><br>T;<br>c.*1770C><br>T;<br>n.*2798C><br>T | p.Gly258Asp<br>;<br>p.Gly300Asp<br>;                                    | 0 | FALSE | chr12:664<br>7123:G:A  | 118:chr12:<br>6647123:G<br>:A  | 0.000643 |
| 86_bl-1 | 86 | EGFR;<br>EGFR-AS1           | MODERATE; MODIFIER | c.2575G>A<br>;n.-1C>T                                                                             | p.Ala859Thr<br>;                                                        | 4 | FALSE | chr7:5525<br>9517:G:A  | 118:chr7:5<br>5259517:G<br>:A  | 0.001058 |
| 86_bl-1 | 86 | PIK3R1                      | MODERATE           | c.1709T>C;<br>c.620T>C;<br>c.809T>C;<br>c.899T>C                                                  | p.Leu570Pro<br>;<br>p.Leu207Pro<br>;<br>p.Leu270Pro<br>;<br>p.Leu300Pro | 2 | FALSE | chr5:6759<br>1116:T:C  | 118:chr5:6<br>7591116:T<br>:C  | 0.000907 |
| 86_bl-1 | 86 | NTRK3                       | MODERATE           | c.995C>T                                                                                          | p.Thr332Met                                                             | 0 | FALSE | chr15:886<br>78541:G:A | 118:chr15:<br>88678541:<br>G:A | 0.000998 |
| 86_bl-1 | 86 | CTNNB1                      | HIGH               | c.283C>T                                                                                          | p.Arg95*                                                                | 0 | FALSE | chr3:4126<br>6486:C:T  | 118:chr3:4<br>1266486:C<br>:T  | 0.001448 |
| 86_bl-1 | 86 | CTNNB1                      | MODERATE           | c.131C>A                                                                                          | p.Pro44His                                                              | 0 | FALSE | chr3:4126<br>6134:C:A  | 118:chr3:4<br>1266134:C<br>:A  | 0.001035 |
| 86_bl-1 | 86 | ERBB2;<br>MIEN1;<br>MIR4728 | MODERATE; MODIFIER | c.2720A>G<br>;<br>c.2765A>G<br>;<br>c.2810A>G<br>;<br>n.3134A>G<br>;<br>c.*388T>C;<br>n.-1A>G     | p.Lys907Arg<br>;<br>p.Lys922Arg<br>;<br>p.Lys937Arg<br>;                | 1 | FALSE | chr17:378<br>82044:A:G | 118:chr17:<br>37882044:<br>A:G | 0.002044 |
| 86_bl-1 | 86 | TP53                        | MODERATE; MODIFIER | c.199C>T;<br>c.82C>T; c.-<br>279C>T; c.-<br>360C>T                                                | p.Pro67Ser;<br>p.Pro28Ser;                                              | 3 | FALSE | chr17:757<br>9488:G:A  | 118:chr17:<br>7579488:G<br>:A  | 0.00134  |



|         |    |        |                    |                                                 |                                                               |    |       |                        |                                |          |
|---------|----|--------|--------------------|-------------------------------------------------|---------------------------------------------------------------|----|-------|------------------------|--------------------------------|----------|
| 86_bl-1 | 86 | CTNNB1 | MODERATE           | c.1972G>T                                       | p.Val658Phe                                                   | 0  | FALSE | chr3:4127<br>8096:G:T  | 118:chr3:4<br>1278096:G<br>:T  | 0.002498 |
| 86_bl-1 | 86 | NF1    | HIGH               | c.3721C>T                                       | p.Arg1241*                                                    | 5  | FALSE | chr17:295<br>62641:C:T | 118:chr17:<br>29562641:<br>C:T | 0.000988 |
| 86_bl-1 | 86 | PIK3CA | MODERATE           | c.3012G>A                                       | p.Met1004Ile                                                  | 8  | FALSE | chr3:1789<br>51957:G:A | 118:chr3:1<br>78951957:<br>G:A | 0.001668 |
| 86_bl-1 | 86 | MET    | HIGH               | c.1639C>T                                       | p.Arg547*                                                     | 2  | FALSE | chr7:1163<br>81017:C:T | 118:chr7:1<br>16381017:<br>C:T | 0.000877 |
| 86_bl-1 | 86 | TP53   | MODERATE           | c.110G>A;<br>c.191G>A;<br>c.470G>A;<br>c.587G>A | p.Arg37Gln;<br>p.Arg64Gln;<br>p.Arg157Gln<br>;<br>p.Arg196Gln | 19 | FALSE | chr17:757<br>8262:C:T  | 118:chr17:<br>7578262:C<br>:T  | 0.000872 |
| 86_bl-1 | 86 | NTRK2  | MODERATE           | c.1240G>A<br>;<br>c.1279G>A                     | p.Gly414Ser<br>;<br>p.Gly427Ser                               | 0  | FALSE | chr9:8735<br>9971:G:A  | 118:chr9:8<br>7359971:G<br>:A  | 0.001413 |
| 86_bl-1 | 86 | DDR2   | MODERATE           | c.397C>T                                        | p.Arg133Trp                                                   | 1  | FALSE | chr1:1627<br>24625:C:T | 118:chr1:1<br>62724625:<br>C:T | 0.0011   |
| 86_bl-1 | 86 | CDKN2A | MODIFIER; MODERATE | c.194-<br>3567C>T;<br>c.53C>T                   | p.Thr18Met                                                    | 1  | FALSE | chr9:2197<br>4774:G:A  | 118:chr9:2<br>1974774:G<br>:A  | 0.001821 |
| 86_bl-1 | 86 | NOTCH1 | MODERATE           | c.4984C>T                                       | p.Arg1662Trp                                                  | 0  | FALSE | chr9:1393<br>99159:G:A | 118:chr9:1<br>39399159:<br>G:A | 0.001663 |
| 86_bl-1 | 86 | FGFR3  | MODERATE           | c.1162G>A<br>;<br>c.1498G>A<br>;<br>c.1504G>A   | p.Ala388Thr<br>;<br>p.Ala500Thr<br>;<br>p.Ala502Thr           | 1  | FALSE | chr4:1807<br>167:G:A   | 118:chr4:1<br>807167:G:<br>A   | 0.001958 |
| 86_bl-1 | 86 | CTNNB1 | MODERATE           | c.1564G>A                                       | p.Ala522Thr                                                   | 0  | FALSE | chr3:4127<br>5669:G:A  | 118:chr3:4<br>1275669:G<br>:A  | 0.002081 |
| 86_bl-1 | 86 | FGFR3  | MODERATE           | c.1070G>A<br>;<br>c.1406G>A<br>;<br>c.1412G>A   | p.Arg357Gln<br>;<br>p.Arg469Gln<br>;<br>p.Arg471Gln           | 1  | FALSE | chr4:1806<br>690:G:A   | 118:chr4:1<br>806690:G:<br>A   | 0.002506 |
| 86_bl-1 | 86 | NTRK1  | MODERATE           | c.804C>G;<br>c.894C>G                           | p.His268Gln<br>;<br>p.His298Gln                               | 1  | FALSE | chr1:1568<br>43468:C:G | 118:chr1:1<br>56843468:<br>C:G | 0.001211 |
| 86_bl-1 | 86 | KDR    | MODERATE           | c.1028C>T                                       | p.Thr343Met                                                   | 3  | FALSE | chr4:5597<br>6884:G:A  | 118:chr4:5<br>5976884:G<br>:A  | 0.000857 |
| 86_bl-1 | 86 | NTRK1  | MODERATE           | c.835C>T;<br>c.925C>T                           | p.Pro279Ser<br>;<br>p.Pro309Ser                               | 1  | FALSE | chr1:1568<br>43499:C:T | 118:chr1:1<br>56843499:<br>C:T | 0.001112 |
| 86_bl-1 | 86 | PTEN   | MODERATE           | c.442G>A                                        | p.Ala148Thr                                                   | 2  | FALSE | chr10:896<br>92958:G:A | 118:chr10:<br>89692958:<br>G:A | 0.001098 |

|         |    |                             |                    |                                                                                                |                                                             |    |       |                        |                                |          |
|---------|----|-----------------------------|--------------------|------------------------------------------------------------------------------------------------|-------------------------------------------------------------|----|-------|------------------------|--------------------------------|----------|
| 86_bl-1 | 86 | CTNNB1                      | HIGH               | c.75G>A                                                                                        | p.Trp25*                                                    | 0  | FALSE | chr3:4126<br>6078:G:A  | 118:chr3:4<br>1266078:G<br>:A  | 0.001068 |
| 86_bl-1 | 86 | IGF1R                       | MODERATE           | c.1940G>A                                                                                      | p.Arg647His                                                 | 0  | FALSE | chr15:994<br>59304:G:A | 118:chr15:<br>99459304:<br>G:A | 0.000702 |
| 86_bl-1 | 86 | PIK3CA                      | MODERATE           | c.1357G>C                                                                                      | p.Glu453Gln                                                 | 20 | FALSE | chr3:1789<br>28079:G:C | 118:chr3:1<br>78928079:<br>G:C | 0.001029 |
| 86_bl-1 | 86 | PIK3CA                      | MODERATE           | c.2176G>A                                                                                      | p.Glu726Lys                                                 | 26 | FALSE | chr3:1789<br>38934:G:A | 118:chr3:1<br>78938934:<br>G:A | 0.001129 |
| 86_bl-1 | 86 | EGFR                        | MODERATE           | c.445C>T                                                                                       | p.Arg149Trp                                                 | 1  | FALSE | chr7:5521<br>4319:C:T  | 118:chr7:5<br>5214319:C<br>:T  | 0.001131 |
| 86_bl-1 | 86 | TP53                        | MODERATE           | c.229T>C;<br>c.310T>C;<br>c.589T>C;<br>c.706T>C                                                | p.Tyr77His;<br>p.Tyr104His;<br>p.Tyr197His;<br>p.Tyr236His  | 18 | FALSE | chr17:757<br>7575:A:G  | 118:chr17:<br>7577575:A<br>:G  | 0.000983 |
| 86_bl-1 | 86 | EGFR;<br>EGFR-AS1           | MODERATE; MODIFIER | c.2568T>G<br>; n.-1A>C                                                                         | p.Phe856Le<br>u;                                            | 1  | FALSE | chr7:5525<br>9510:T:G  | 118:chr7:5<br>5259510:T<br>:G  | 0.001029 |
| 86_bl-1 | 86 | ERBB2;<br>MIR4728           | MODERATE; MODIFIER | c.2211C>G<br>;<br>c.2256C>G<br>;<br>c.2301C>G<br>;<br>n.2625C>G<br>; n.-1C>G                   | p.Ile737Met<br>;<br>p.Ile752Met<br>;<br>p.Ile767Met<br>;    | 6  | FALSE | chr17:378<br>80257:C:G | 118:chr17:<br>37880257:<br>C:G | 0.00539  |
| 86_bl-1 | 86 | CDH1                        | MODERATE           | c.2071G>A                                                                                      | p.Ala691Thr                                                 | 0  | FALSE | chr16:688<br>57436:G:A | 118:chr16:<br>68857436:<br>G:A | 0.000966 |
| 86_bl-1 | 86 | STK11                       | MODERATE           | c.628T>C                                                                                       | p.Cys210Arg                                                 | 1  | FALSE | chr19:122<br>0610:T:C  | 118:chr19:<br>1220610:T<br>:C  | 0.01105  |
| 86_bl-1 | 86 | ERBB2;<br>MIEN1;<br>MIR4728 | MODERATE; MODIFIER | c.3025G>A<br>;<br>c.3070G>A<br>;<br>c.3115G>A<br>;<br>n.3439G>A<br>;<br>c.*388C>T;<br>n.*67G>A | p.Ala1009Th<br>r;<br>p.Ala1024Th<br>r;<br>p.Ala1039Th<br>r; | 2  | FALSE | chr17:378<br>83212:G:A | 118:chr17:<br>37883212:<br>G:A | 0.001252 |
| 86_bl-1 | 86 | RPL19                       | MODERATE           | c.406C>T                                                                                       | p.Arg136Trp                                                 | 0  | FALSE | chr17:373<br>60379:C:T | 118:chr17:<br>37360379:<br>C:T | 0.000903 |
| 86_bl-1 | 86 | KIT                         | MODERATE           | c.1493G>A                                                                                      | p.Gly498Asp                                                 | 1  | FALSE | chr4:5559<br>2169:G:A  | 118:chr4:5<br>5592169:G<br>:A  | 0.001177 |
| 86_bl-1 | 86 | FGFR3                       | MODERATE           | c.599G>A                                                                                       | p.Arg200His                                                 | 1  | FALSE | chr4:1803<br>247:G:A   | 118:chr4:1<br>803247:G:<br>A   | 0.001921 |

|         |    |                                 |                            |                                                                              |                                                                                                                 |    |       |                        |                                |          |
|---------|----|---------------------------------|----------------------------|------------------------------------------------------------------------------|-----------------------------------------------------------------------------------------------------------------|----|-------|------------------------|--------------------------------|----------|
| 86_bl-1 | 86 | PIK3CA                          | MODERATE                   | c.323G>A                                                                     | p.Arg108His                                                                                                     | 33 | FALSE | chr3:1789<br>16936:G:A | 118:chr3:1<br>78916936:<br>G:A | 0.000942 |
| 86_bl-1 | 86 | TP53                            | MODERATE                   | c.361A>G;<br>c.442A>G;<br>c.721A>G;<br>c.838A>G                              | p.Arg121Gly<br>;<br>p.Arg148Gly<br>;<br>p.Arg241Gly<br>;<br>p.Arg280Gly                                         | 24 | FALSE | chr17:757<br>7100:T:C  | 118:chr17:<br>7577100:T<br>:C  | 0.001029 |
| 86_bl-1 | 86 | ERBB2;<br>MIR4728               | MODERATE; LOW;<br>MODIFIER | c.2215G>C<br>;<br>c.2260G>C<br>;<br>c.2305G>C<br>;<br>n.2629G>C<br>; n.-1G>C | p.Asp739His<br>;<br>p.Asp754His<br>;<br>p.Asp769His<br>;                                                        | 5  | FALSE | chr17:378<br>80261:G:C | 118:chr17:<br>37880261:<br>G:C | 0.315158 |
| 86_bl-1 | 86 | CTNNB1                          | MODERATE                   | c.37G>A                                                                      | p.Ala13Thr                                                                                                      | 0  | FALSE | chr3:4126<br>6040:G:A  | 118:chr3:4<br>1266040:G<br>:A  | 0.001113 |
| 86_bl-1 | 86 | CDH1                            | MODERATE                   | c.893C>T                                                                     | p.Ala298Val                                                                                                     | 0  | FALSE | chr16:688<br>45647:C:T | 118:chr16:<br>68845647:<br>C:T | 0.001694 |
| 86_bl-1 | 86 | FGFR1                           | MODERATE                   | c.487C>T;<br>c.493C>T;<br>c.736C>T;<br>c.754C>T;<br>c.760C>T;<br>c.853C>T    | p.Arg163Trp<br>;<br>p.Arg165Trp<br>;<br>p.Arg246Trp<br>;<br>p.Arg252Trp<br>;<br>p.Arg254Trp<br>;<br>p.Arg285Trp | 1  | FALSE | chr8:3828<br>2203:G:A  | 118:chr8:3<br>8282203:G<br>:A  | 0.0004   |
| 86_bl-1 | 86 | KIT                             | MODERATE                   | c.154G>A                                                                     | p.Asp52Asn                                                                                                      | 7  | FALSE | chr4:5556<br>1764:G:A  | 118:chr4:5<br>5561764:G<br>:A  | 0.001267 |
| 86_bl-1 | 86 | CDKN2A                          | MODIFIER; MODERATE         | c.194-<br>3570C>G;<br>c.50C>G                                                | ; p.Ala17Gly                                                                                                    | 1  | FALSE | chr9:2197<br>4777:G:C  | 118:chr9:2<br>1974777:G<br>:C  | 0.015474 |
| 86_bl-1 | 86 | HGF                             | MODERATE                   | c.686G>A;<br>c.701G>A                                                        | p.Arg229His<br>;<br>p.Arg234His                                                                                 | 0  | FALSE | chr7:8137<br>4361:C:T  | 118:chr7:8<br>1374361:C<br>:T  | 0.001228 |
| 86_bl-1 | 86 | FOXL2;<br>FOXL2NB;<br>LINC01391 | MODERATE; MODIFIER         | c.282T>A;<br>c.-132A>T;<br>n.-1T>A                                           | p.Asn94Lys;                                                                                                     | 0  | FALSE | chr3:1386<br>65283:A:T | 118:chr3:1<br>38665283:<br>A:T | 0.010458 |

|         |    |                 |                    |                                                                                                                                                                                                        |                                                                                                                      |   |       |                             |                                 |          |
|---------|----|-----------------|--------------------|--------------------------------------------------------------------------------------------------------------------------------------------------------------------------------------------------------|----------------------------------------------------------------------------------------------------------------------|---|-------|-----------------------------|---------------------------------|----------|
| 86_bl-1 | 86 | CSDE1;<br>NRAS  | MODIFIER; MODERATE | c.*2430C><br>T;<br>c.*2523C><br>T;<br>c.*2817C><br>T;<br>c.*2910C><br>T;<br>c.*2964C><br>T;<br>c.*3057C><br>T;<br>c.173C>T                                                                             | ; p.Thr58Ile                                                                                                         | 1 | FALSE | chr1:1152<br>56538:G:A      | 118:chr1:1<br>15256538:<br>G:A  | 0.001164 |
| 86_bl-1 | 86 | KIT             | MODERATE           | c.155A>G                                                                                                                                                                                               | p.Asp52Gly                                                                                                           | 4 | FALSE | chr4:5556<br>1765:A:G       | 118:chr4:5<br>5561765:A<br>:G   | 0.000844 |
| 86_bl-1 | 86 | IGF1R           | MODERATE           | c.1732G>A                                                                                                                                                                                              | p.Ala578Thr                                                                                                          | 0 | FALSE | chr15:994<br>56415:G:A      | 118:chr15:<br>99456415:<br>G:A  | 0.000748 |
| 86_bl-1 | 86 | FGFR1;<br>LETM2 | MODERATE; MODIFIER | c.1777T>G<br>;<br>c.1783T>G<br>;<br>c.2020T>G<br>;<br>c.2044T>G<br>;<br>c.2050T>G<br>;<br>c.2143T>G<br>;<br>c.*1406A><br>C;<br>c.*1423A><br>C;<br>c.*1553A><br>C;<br>c.*1567A><br>C;<br>c.*1638A><br>C | p.Trp593Gly<br>;<br>p.Trp595Gly<br>;<br>p.Trp674Gly<br>;<br>p.Trp682Gly<br>;<br>p.Trp684Gly<br>;<br>p.Trp715Gly<br>; | 1 | FALSE | chr8:3827<br>1806:A:C       | 118:chr8:3<br>8271806:A<br>:C   | 0.002493 |
| 86_bl-1 | 86 | IGF1R           | MODERATE           | c.1784G>A                                                                                                                                                                                              | p.Arg595His                                                                                                          | 0 | FALSE | chr15:994<br>56467:G:A      | 118:chr15:<br>99456467:<br>G:A  | 0.000767 |
| 86_bl-1 | 86 | ATM             | MODERATE           | c.8158G>A                                                                                                                                                                                              | p.Asp2720A<br>sn                                                                                                     | 0 | FALSE | chr11:108<br>206578:G:<br>A | 118:chr11:<br>10820657<br>8:G:A | 0.001031 |

|         |    |                   |                    |                                                                                                                                                                                |                                                                                                                      |   |       |                        |                                |          |
|---------|----|-------------------|--------------------|--------------------------------------------------------------------------------------------------------------------------------------------------------------------------------|----------------------------------------------------------------------------------------------------------------------|---|-------|------------------------|--------------------------------|----------|
| 86_bl-1 | 86 | FGFR1;<br>LETM2   | MODERATE; MODIFIER | c.1927C>T;<br>c.1933C>T;<br>c.2170C>T;<br>c.2194C>T;<br>c.2200C>T;<br>c.2293C>T;<br>c.*1406G><br>A;<br>c.*1423G><br>A;<br>c.*1553G><br>A;<br>c.*1567G><br>A;<br>c.*1638G><br>A | p.Arg643Trp<br>;<br>p.Arg645Trp<br>;<br>p.Arg724Trp<br>;<br>p.Arg732Trp<br>;<br>p.Arg734Trp<br>;<br>p.Arg765Trp<br>; | 1 | FALSE | chr8:3827<br>1528:G:A  | 118:chr8:3<br>8271528:G<br>:A  | 0.00058  |
| 86_bl-1 | 86 | FGFR4             | MODIFIER; MODERATE | c.1098-<br>65G>A;<br>c.1251+10<br>G>A;<br>c.1067G>A                                                                                                                            | p.Arg356His<br>;                                                                                                     | 1 | FALSE | chr5:1765<br>20342:G:A | 118:chr5:1<br>76520342:<br>G:A | 0.002418 |
| 86_bl-1 | 86 | TP53              | MODERATE           | c.149G>A;<br>c.428G>A;<br>c.545G>A;<br>c.68G>A                                                                                                                                 | p.Cys50Tyr;<br>p.Cys143Tyr<br>;<br>p.Cys182Tyr<br>;<br>p.Cys23Tyr<br>;                                               | 2 | FALSE | chr17:757<br>8385:C:T  | 118:chr17:<br>7578385:C<br>:T  | 0.000823 |
| 86_bl-1 | 86 | BRAF              | MODERATE           | c.2153C>T                                                                                                                                                                      | p.Ala178Val                                                                                                          | 1 | FALSE | chr7:1404<br>34545:G:A | 118:chr7:1<br>40434545:<br>G:A | 0.002671 |
| 86_bl-1 | 86 | NF1               | MODERATE           | c.5381A>G<br>;<br>c.5444A>G                                                                                                                                                    | p.Gln1794Ar<br>g;<br>p.Gln1815Ar<br>g                                                                                | 1 | FALSE | chr17:296<br>54692:A:G | 118:chr17:<br>29654692:<br>A:G | 0.000876 |
| 86_bl-1 | 86 | CDKN2A            | MODIFIER; MODERATE | c.194-<br>3537T>G;<br>c.83T>G                                                                                                                                                  | p.Val28Gly<br>;                                                                                                      | 1 | FALSE | chr9:2197<br>4744:A:C  | 118:chr9:2<br>1974744:A<br>:C  | 0.085353 |
| 86_bl-1 | 86 | HGF               | MODERATE           | c.167C>T                                                                                                                                                                       | p.Ala56Val                                                                                                           | 0 | FALSE | chr7:8139<br>2110:G:A  | 118:chr7:8<br>1392110:G<br>:A  | 0.0011   |
| 86_bl-1 | 86 | KDR               | MODERATE           | c.1699G>A                                                                                                                                                                      | p.Val567Me<br>t                                                                                                      | 1 | FALSE | chr4:5597<br>1098:C:T  | 118:chr4:5<br>5971098:C<br>:T  | 0.000811 |
| 86_bl-1 | 86 | VHL               | MODIFIER; MODERATE | c.341-<br>3270A>C;<br>c.344A>C                                                                                                                                                 | p.His115Pro<br>;                                                                                                     | 0 | FALSE | chr3:1018<br>8201:A:C  | 118:chr3:1<br>0188201:A<br>:C  | 0.001655 |
| 86_bl-1 | 86 | EGFR;<br>EGFR-AS1 | MODERATE; MODIFIER | c.2320G>A<br>;<br>n.1242C>T                                                                                                                                                    | p.Val774Me<br>t;                                                                                                     | 6 | FALSE | chr7:5524<br>9022:G:A  | 118:chr7:5<br>5249022:G<br>:A  | 0.000927 |

|         |    |                    |                    |                                                                               |                                                          |    |       |                             |                                 |          |
|---------|----|--------------------|--------------------|-------------------------------------------------------------------------------|----------------------------------------------------------|----|-------|-----------------------------|---------------------------------|----------|
| 86_bl-1 | 86 | FGFR1              | MODIFIER; MODERATE | c.-32G>A;<br>c.160G>A;<br>c.61G>A                                             | p.Ala54Thr;<br>p.Ala21Thr                                | 2  | FALSE | chr8:3831<br>4904:C:T       | 118:chr8:3<br>8314904:C<br>:T   | 0.000527 |
| 86_bl-1 | 86 | TP53               | MODIFIER; MODERATE | c.*116C>T;<br>c.*28C>T;<br>c.1009C>T;<br>c.532C>T;<br>c.613C>T;<br>c.892C>T   | p.Arg337Cys<br>p.Arg178Cys<br>p.Arg205Cys<br>p.Arg298Cys | 31 | FALSE | chr17:757<br>4018:G:A       | 118:chr17:<br>7574018:G<br>:A   | 0.000862 |
| 86_bl-1 | 86 | IGF1R              | MODERATE           | c.3905T>C;<br>c.3908T>C                                                       | p.Val1302Al<br>a;<br>p.Val1303Al<br>a                    | 0  | FALSE | chr15:995<br>00475:T:C      | 118:chr15:<br>99500475:<br>T:C  | 0.020372 |
| 86_bl-1 | 86 | ATM                | HIGH               | c.6311G>A                                                                     | p.Trp2104*                                               | 0  | FALSE | chr11:108<br>188212:G:<br>A | 118:chr11:<br>10818821<br>2:G:A | 0.001447 |
| 86_bl-1 | 86 | GNA11              | MODERATE           | c.1030G>A                                                                     | p.Val344Me<br>t                                          | 1  | FALSE | chr19:312<br>1127:G:A       | 118:chr19:<br>3121127:G<br>:A   | 0.001284 |
| 86_bl-1 | 86 | NTRK1              | MODERATE           | c.1940T>G<br>;<br>c.2030T>G<br>;<br>c.2048T>G                                 | p.Val647Gly;<br>p.Val677Gly;<br>p.Val683Gly              | 2  | FALSE | chr1:1568<br>49792:T:G      | 118:chr1:1<br>56849792:<br>T:G  | 0.037428 |
| 86_bl-1 | 86 | TP53               | MODIFIER; MODERATE | c.*145T>C;<br>c.*233T>C;<br>c.1009T>C;<br>c.1126T>C;<br>c.649T>C;<br>c.730T>C | p.Ser337Pro<br>p.Ser376Pro<br>p.Ser217Pro<br>p.Ser244Pro | 2  | FALSE | chr17:757<br>2983:A:G       | 118:chr17:<br>7572983:A<br>:G   | 0.006628 |
| 86_bl-1 | 86 | C9orf53;<br>CDKN2A | MODIFIER; MODERATE | n.*616C>G<br>;<br>c.*167G>C<br>;<br>c.244G>C;<br>c.287G>C                     | p.Val82Leu;<br>p.Arg96Pro                                | 3  | FALSE | chr9:2197<br>1114:C:G       | 118:chr9:2<br>1971114:C<br>:G   | 0.001704 |

|         |    |                             |                    |                                                                                    |                                                                                             |   |       |                             |                                 |          |
|---------|----|-----------------------------|--------------------|------------------------------------------------------------------------------------|---------------------------------------------------------------------------------------------|---|-------|-----------------------------|---------------------------------|----------|
| 86_bl-1 | 86 | ERBB2;<br>MIEN1;<br>MIR4728 | MODERATE; MODIFIER | c.2542C>T;<br>c.2587C>T;<br>c.2632C>T;<br>n.2956C>T<br>;<br>c.*388G>A<br>; n.-1C>T | p.His848Tyr;<br>p.His863Tyr;<br>p.His878Tyr;                                                | 2 | FALSE | chr17:378<br>81440:C:T      | 118:chr17:<br>37881440:<br>C:T  | 0.001674 |
| 86_bl-1 | 86 | SMO                         | MODERATE           | c.703G>A                                                                           | p.Ala235Thr                                                                                 | 0 | FALSE | chr7:1288<br>45209:G:A      | 118:chr7:1<br>28845209:<br>G:A  | 0.001794 |
| 86_bl-1 | 86 | PIK3CA                      | MODERATE           | c.1022C>T                                                                          | p.Ala341Val                                                                                 | 2 | FALSE | chr3:1789<br>21540:C:T      | 118:chr3:1<br>78921540:<br>C:T  | 0.001637 |
| 86_bl-1 | 86 | ATM                         | MODERATE           | c.2075G>A                                                                          | p.Arg692His                                                                                 | 0 | FALSE | chr11:108<br>124717:G:<br>A | 118:chr11:<br>10812471<br>7:G:A | 0.000854 |
| 86_bl-1 | 86 | IGF1R                       | MODERATE           | c.1538G>A                                                                          | p.Arg513Gln                                                                                 | 0 | FALSE | chr15:994<br>54619:G:A      | 118:chr15:<br>99454619:<br>G:A  | 0.000669 |
| 86_bl-1 | 86 | MAP2K1                      | MODERATE           | c.199G>A                                                                           | p.Asp67Asn                                                                                  | 4 | FALSE | chr15:667<br>27483:G:A      | 118:chr15:<br>66727483:<br>G:A  | 0.0018   |
| 86_bl-1 | 86 | FGFR1                       | MODERATE           | c.359C>T;<br>c.365C>T;<br>c.608C>T;<br>c.626C>T;<br>c.632C>T;<br>c.725C>T          | p.Ala120Val;<br>p.Ala122Val;<br>p.Ala203Val;<br>p.Ala209Val;<br>p.Ala211Val;<br>p.Ala242Val | 1 | FALSE | chr8:3828<br>3753:G:A       | 118:chr8:3<br>8283753:G<br>:A   | 0.000654 |
| 86_bl-1 | 86 | MIR4673;<br>NOTCH1          | MODIFIER; MODERATE | n.*59A>C;<br>c.1195A>C                                                             | ; p.Thr399Pro                                                                               | 0 | FALSE | chr9:1394<br>12649:T:G      | 118:chr9:1<br>39412649:<br>T:G  | 0.012048 |
| 86_bl-1 | 86 | FGFR3                       | MODERATE           | c.1543G>A<br>;<br>c.1879G>A<br>;<br>c.1885G>A                                      | p.Glu515Lys<br>;<br>p.Glu627Lys<br>;<br>p.Glu629Lys                                         | 1 | FALSE | chr4:1807<br>820:G:A        | 118:chr4:1<br>807820:G:<br>A    | 0.001889 |
| 86_bl-1 | 86 | NTRK3                       | MODERATE           | c.2005C>T;<br>c.2029C>T                                                            | p.His669Tyr;<br>p.His677Tyr                                                                 | 0 | FALSE | chr15:884<br>72526:G:A      | 118:chr15:<br>88472526:<br>G:A  | 0.000953 |
| 86_bl-1 | 86 | CDH1                        | MODERATE           | c.1489G>A                                                                          | p.Glu497Lys                                                                                 | 0 | FALSE | chr16:688<br>49586:G:A      | 118:chr16:<br>68849586:<br>G:A  | 0.000865 |
| 86_bl-1 | 86 | KLLN;<br>PTEN               | MODIFIER; MODERATE | c.-951A>G;<br>c.79T>C                                                              | ; p.Tyr27His                                                                                | 4 | FALSE | chr10:896<br>24305:T:C      | 118:chr10:<br>89624305:<br>T:C  | 0.001224 |
| 86_bl-1 | 86 | NF1                         | MODERATE           | c.2695T>G                                                                          | p.Leu899Val                                                                                 | 3 | FALSE | chr17:295<br>56328:T:G      | 118:chr17:<br>29556328:<br>T:G  | 0.063785 |

|         |    |                    |                    |                                                                                                                                          |                                                                                                  |   |       |                        |                                |          |
|---------|----|--------------------|--------------------|------------------------------------------------------------------------------------------------------------------------------------------|--------------------------------------------------------------------------------------------------|---|-------|------------------------|--------------------------------|----------|
| 86_bl-1 | 86 | C9orf53;<br>CDKN2A | MODIFIER; MODERATE | n.*616C>G<br>;<br>c.*140G>C<br>;<br>c.217G>C;<br>c.260G>C                                                                                | p.Ala73Pro;<br>p.Arg87Pro                                                                        | 1 | FALSE | chr9:2197<br>1141:C:G  | 118:chr9:2<br>1971141:C<br>:G  | 0.005386 |
| 86_bl-1 | 86 | DDR2               | MODERATE           | c.185G>A                                                                                                                                 | p.Arg62Lys                                                                                       | 1 | FALSE | chr1:1627<br>22987:G:A | 118:chr1:1<br>62722987:<br>G:A | 0.001057 |
| 86_bl-1 | 86 | PKD1;<br>TSC2      | MODIFIER; MODERATE | c.*13118G<br>>A;<br>c.*13121G<br>>A;<br>c.4091C>T;<br>c.4223C>T;<br>c.4292C>T                                                            | p.Ser1364Le<br>u;<br>p.Ser1408Le<br>u;<br>p.Ser1431Le<br>u                                       | 0 | FALSE | chr16:213<br>4515:C:T  | 118:chr16:<br>2134515:C<br>:T  | 0.000814 |
| 86_bl-1 | 86 | TSC2               | MODERATE           | c.2702G>A                                                                                                                                | p.Arg901His                                                                                      | 0 | FALSE | chr16:212<br>6131:G:A  | 118:chr16:<br>2126131:G<br>:A  | 0.000984 |
| 86_bl-1 | 86 | IGF1R              | MODERATE           | c.3934T>C;<br>c.3937T>C                                                                                                                  | p.Ser1312Pr<br>o;<br>p.Ser1313Pr<br>o                                                            | 0 | FALSE | chr15:995<br>00504:T:C | 118:chr15:<br>99500504:<br>T:C | 0.043846 |
| 86_bl-1 | 86 | RET                | MODERATE           | c.1867G>A                                                                                                                                | p.Glu623Lys                                                                                      | 1 | FALSE | chr10:436<br>09111:G:A | 118:chr10:<br>43609111:<br>G:A | 0.001337 |
| 86_bl-1 | 86 | AR                 | MODERATE           | c.1933G>A<br>; c.337G>A                                                                                                                  | p.Glu645Lys<br>;<br>p.Glu113Lys                                                                  | 0 | FALSE | chrX:6693<br>1291:G:A  | 118:chrX:6<br>6931291:G<br>:A  | 0.001017 |
| 86_bl-1 | 86 | NF1                | MODERATE           | c.4463G>A<br>;<br>c.4526G>A                                                                                                              | p.Arg1488Hi<br>s;<br>p.Arg1509Hi<br>s                                                            | 1 | FALSE | chr17:295<br>87482:G:A | 118:chr17:<br>29587482:<br>G:A | 0.00095  |
| 86_bl-1 | 86 | EGFR;<br>EGFR-AS1  | MODERATE; MODIFIER | c.2591C>T;<br>n.-1G>A                                                                                                                    | p.Ala864Val;                                                                                     | 2 | FALSE | chr7:5525<br>9533:C:T  | 118:chr7:5<br>5259533:C<br>:T  | 0.001641 |
| 86_bl-1 | 86 | DDR2               | LOW                | c.1503A>G                                                                                                                                | p.Ser501Ser                                                                                      | 1 | FALSE | chr1:1627<br>40301:A:G | 118:chr1:1<br>62740301:<br>A:G | 0.001076 |
| 86_bl-1 | 86 | GNAS               | MODIFIER; MODERATE | c.*1002G><br>A;<br>c.*957G>A<br>;<br>c.1051G>A<br>;<br>c.1054G>A<br>;<br>c.1096G>A<br>;<br>c.1099G>A<br>;<br>c.3025G>A<br>;<br>n.1186G>A | p.Ala351Thr<br>;<br>p.Ala352Thr<br>;<br>p.Ala366Thr<br>;<br>p.Ala367Thr<br>;<br>p.Ala1009Th<br>r | 0 | FALSE | chr20:574<br>85795:G:A | 118:chr20:<br>57485795:<br>G:A | 0.001181 |



|         |    |                    |                            |                                                                                 |                                                                                             |   |       |                    |                        |          |
|---------|----|--------------------|----------------------------|---------------------------------------------------------------------------------|---------------------------------------------------------------------------------------------|---|-------|--------------------|------------------------|----------|
| 86_bl-1 | 86 | IGF1R              | MODERATE                   | c.1172G>A                                                                       | p.Arg391His                                                                                 | 0 | FALSE | chr15:99442775:G:A | 118:chr15:99442775:G:A | 0.000807 |
| 86_bl-1 | 86 | ERBB2              | MODERATE; MODIFIER         | c.322C>T;<br>c.367C>T;<br>c.412C>T;<br>n.736C>T                                 | p.Arg108Trp;<br>p.Arg123Trp;<br>p.Arg138Trp                                                 | 1 | FALSE | chr17:37864760:C:T | 118:chr17:37864760:C:T | 0.000832 |
| 86_bl-1 | 86 | C9orf53;<br>CDKN2A | MODIFIER; MODERATE;<br>LOW | n.*616G>A;<br>c.*147C>T;<br>c.224C>T;<br>c.267C>T                               | p.Pro75Leu;<br>p.Pro89Pro                                                                   | 2 | FALSE | chr9:21971134:G:A  | 118:chr9:21971134:G:A  | 0.002225 |
| 86_bl-1 | 86 | CTNNB1             | MODERATE                   | c.1345C>T                                                                       | p.Arg449Cys                                                                                 | 0 | FALSE | chr3:41275179:C:T  | 118:chr3:41275179:C:T  | 0.000812 |
| 86_bl-1 | 86 | CDKN2A             | MODIFIER; MODERATE         | c.194-3568A>C;<br>c.52A>C                                                       | p.Thr18Pro                                                                                  | 1 | FALSE | chr9:21974775:T:G  | 118:chr9:21974775:T:G  | 0.050962 |
| 86_bl-1 | 86 | MET                | HIGH                       | c.3064C>T;<br>c.3118C>T                                                         | p.Arg1022*;<br>p.Arg1040*                                                                   | 1 | FALSE | chr7:116414970:C:T | 118:chr7:116414970:C:T | 0.000957 |
| 86_bl-1 | 86 | FGFR1              | LOW; MODIFIER;<br>MODERATE | c.-25C>T;<br>c.167C>T;<br>c.68C>T                                               | p.Pro56Leu;<br>p.Pro23Leu                                                                   | 1 | FALSE | chr8:38314897:G:A  | 118:chr8:38314897:G:A  | 0.00037  |
| 86_bl-1 | 86 | NOTCH1             | MODERATE                   | c.5810G>A                                                                       | p.Arg1937His                                                                                | 0 | FALSE | chr9:139395128:C:T | 118:chr9:139395128:C:T | 0.001815 |
| 86_bl-1 | 86 | DDR2               | MODERATE                   | c.1418G>A                                                                       | p.Arg473His                                                                                 | 2 | FALSE | chr1:162740216:G:A | 118:chr1:162740216:G:A | 0.001339 |
| 86_bl-1 | 86 | KDR                | MODERATE                   | c.2323G>T                                                                       | p.Ala775Ser                                                                                 | 1 | FALSE | chr4:55964914:C:A  | 118:chr4:55964914:C:A  | 0.011189 |
| 86_bl-1 | 86 | FGFR1              | MODERATE                   | c.1060C>T;<br>c.1066C>T;<br>c.1303C>T;<br>c.1327C>T;<br>c.1333C>T;<br>c.1426C>T | p.Arg354Trp;<br>p.Arg356Trp;<br>p.Arg435Trp;<br>p.Arg443Trp;<br>p.Arg445Trp;<br>p.Arg476Trp | 2 | FALSE | chr8:38275843:G:A  | 118:chr8:38275843:G:A  | 0.000338 |
| 86_bl-1 | 86 | PIK3CA             | MODERATE                   | c.3149G>A                                                                       | p.Gly1050Asp                                                                                | 3 | FALSE | chr3:178952094:G:A | 118:chr3:178952094:G:A | 0.000923 |
| 86_bl-1 | 86 | PDGFRA             | MODERATE                   | c.577G>A                                                                        | p.Val193Ile                                                                                 | 2 | FALSE | chr4:55130043:G:A  | 118:chr4:55130043:G:A  | 0.000779 |

|         |    |                    |                    |                                                                                                     |                                                                                             |      |       |                    |                        |          |
|---------|----|--------------------|--------------------|-----------------------------------------------------------------------------------------------------|---------------------------------------------------------------------------------------------|------|-------|--------------------|------------------------|----------|
| 86_bl-1 | 86 | FGFR1              | MODERATE           | c.1666G>A<br>;<br>c.1672G>A<br>;<br>c.1909G>A<br>;<br>c.1933G>A<br>;<br>c.1939G>A<br>;<br>c.2032G>A | p.Asp556Asn;<br>p.Asp558Asn;<br>p.Asp637Asn;<br>p.Asp645Asn;<br>p.Asp647Asn;<br>p.Asp678Asn | 1    | FALSE | chr8:38272335:C:T  | 118:chr8:38272335:C:T  | 0.000624 |
| 86_bl-1 | 86 | TP53               | MODERATE           | c.421C>T;<br>c.502C>T;<br>c.781C>T;<br>c.898C>T                                                     | p.Pro141Ser;<br>p.Pro168Ser;<br>p.Pro261Ser;<br>p.Pro300Ser                                 | 3    | FALSE | chr17:757040:G:A   | 118:chr17:757040:G:A   | 0.000924 |
| 86_bl-1 | 86 | PIK3CA             | MODERATE           | c.1633G>A                                                                                           | p.Glu545Lys                                                                                 | 1189 | FALSE | chr3:178936091:G:A | 118:chr3:178936091:G:A | 0.004985 |
| 86_bl-1 | 86 | NTRK1              | MODERATE           | c.1669C>T;<br>c.1759C>T;<br>c.1777C>T                                                               | p.Arg557Trp;<br>p.Arg587Trp;<br>p.Arg593Trp                                                 | 1    | FALSE | chr1:156846336:C:T | 118:chr1:156846336:C:T | 0.000983 |
| 86_bl-1 | 86 | FGFR3              | MODERATE           | c.682T>C                                                                                            | p.Cys228Arg                                                                                 | 2    | FALSE | chr4:1803413:T:C   | 118:chr4:1803413:T:C   | 0.003121 |
| 86_bl-1 | 86 | C9orf53;<br>CDKN2A | MODIFIER; MODERATE | n.*616G>A<br>;<br>c.*318C>T;<br>c.*39C>T;<br>c.395C>T                                               | p.Ala132Val                                                                                 | 1    | FALSE | chr9:21970963:G:A  | 118:chr9:21970963:G:A  | 0.001552 |
| 86_bl-1 | 86 | EPHA3              | MODERATE           | c.1532C>T                                                                                           | p.Ala511Val                                                                                 | 0    | FALSE | chr3:89448568:C:T  | 118:chr3:89448568:C:T  | 0.001445 |
| 86_bl-1 | 86 | TP53               | MODERATE           | c.143A>G;<br>c.422A>G;<br>c.539A>G;<br>c.62A>G                                                      | p.Glu48Gly;<br>p.Glu141Gly;<br>p.Glu180Gly;<br>p.Glu21Gly                                   | 1    | FALSE | chr17:7578391:T:C  | 118:chr17:7578391:T:C  | 0.001258 |
| 86_bl-1 | 86 | EGFR               | MODERATE           | c.442G>A                                                                                            | p.Val148Met                                                                                 | 1    | FALSE | chr7:55214316:G:A  | 118:chr7:55214316:G:A  | 0.001716 |
| 86_bl-1 | 86 | PDGFRA             | MODERATE           | c.571G>A                                                                                            | p.Ala191Thr                                                                                 | 1    | FALSE | chr4:55130037:G:A  | 118:chr4:55130037:G:A  | 0.00078  |
| 86_bl-1 | 86 | FBXW7              | MODERATE           | c.589G>A;<br>c.703G>A;<br>c.943G>A                                                                  | p.Ala197Thr;<br>p.Ala235Thr;<br>p.Ala315Thr                                                 | 0    | FALSE | chr4:153253790:C:T | 118:chr4:153253790:C:T | 0.000966 |

|                |     |                           |                    |                                                                                                                                                                                                        |                                                                                                                 |   |       |                             |                                 |          |
|----------------|-----|---------------------------|--------------------|--------------------------------------------------------------------------------------------------------------------------------------------------------------------------------------------------------|-----------------------------------------------------------------------------------------------------------------|---|-------|-----------------------------|---------------------------------|----------|
| 86_bl-1        | 86  | PIK3CA                    | MODERATE           | c.333G>C                                                                                                                                                                                               | p.Lys111Asn                                                                                                     | 9 | FALSE | chr3:1789<br>16946:G:C      | 118:chr3:1<br>78916946:<br>G:C  | 0.000994 |
| 86_bl-1        | 86  | FGFR1;<br>LETM2           | MODERATE; MODIFIER | c.1834G>A<br>;<br>c.1840G>A<br>;<br>c.2077G>A<br>;<br>c.2101G>A<br>;<br>c.2107G>A<br>;<br>c.2200G>A<br>;<br>c.*1406C><br>T;<br>c.*1423C><br>T;<br>c.*1553C><br>T;<br>c.*1567C><br>T;<br>c.*1638C><br>T | p.Gly612Ser<br>;<br>p.Gly614Ser<br>;<br>p.Gly693Ser<br>;<br>p.Gly701Ser<br>;<br>p.Gly703Ser<br>;<br>p.Gly734Ser | 2 | FALSE | chr8:3827<br>1749:C:T       | 118:chr8:3<br>8271749:C<br>:T   | 0.000853 |
| 86_bl-1        | 86  | MITF                      | MODERATE           | c.127A>C;<br>c.235A>C;<br>c.280A>C;<br>c.283A>C                                                                                                                                                        | p.Thr43Pro;<br>p.Thr79Pro;<br>p.Thr94Pro;<br>p.Thr95Pro                                                         | 0 | FALSE | chr3:6992<br>8463:A:C       | 118:chr3:6<br>9928463:A<br>:C   | 0.135701 |
| 86_bl-1        | 86  | SMO                       | MODERATE           | c.1045A>C                                                                                                                                                                                              | p.Thr349Pro                                                                                                     | 0 | FALSE | chr7:1288<br>46115:A:C      | 118:chr7:1<br>28846115:<br>A:C  | 0.043412 |
| 86_bl-1        | 86  | KDR                       | MODERATE           | c.2315C>T                                                                                                                                                                                              | p.Ala772Val                                                                                                     | 1 | FALSE | chr4:5596<br>4922:G:A       | 118:chr4:5<br>5964922:G<br>:A   | 0.001376 |
| 86_bl-1        | 86  | FGFR2                     | MODIFIER; MODERATE | c.110-<br>1053G>A;<br>c.110-<br>14173G>A;<br>n.757-<br>14173G>A;<br>c.182G>A                                                                                                                           | ; p.Arg61His                                                                                                    | 1 | FALSE | chr10:123<br>325146:C:<br>T | 118:chr10:<br>12332514<br>6:C:T | 0.001791 |
| 86_bl-1        | 86  | CWH43                     | MODERATE           | c.209C>T;<br>c.290C>T                                                                                                                                                                                  | p.Ala70Val;<br>p.Ala97Val                                                                                       | 0 | FALSE | chr4:4899<br>3525:C:T       | 118:chr4:4<br>8993525:C<br>:T   | 0.001595 |
| 131_c1w2-<br>1 | 131 | CDKN2B;<br>CDKN2B-<br>AS1 | MODERATE; MODIFIER | c.118C>T;<br>n.371+136<br>75G>A                                                                                                                                                                        | p.Pro40Ser;                                                                                                     | 0 | FALSE | chr9:2200<br>8835:G:A       | 119:chr9:2<br>2008835:G<br>:A   | 0.001704 |

|            |     |       |                    |                                                  |                                                                         |     |       |                        |                                |          |
|------------|-----|-------|--------------------|--------------------------------------------------|-------------------------------------------------------------------------|-----|-------|------------------------|--------------------------------|----------|
| 131_c1w2-1 | 131 | TP53  | MODERATE           | c.362G>A;<br>c.443G>A;<br>c.722G>A;<br>c.839G>A  | p.Arg121Lys<br>;<br>p.Arg148Lys<br>;<br>p.Arg241Lys<br>;<br>p.Arg280Lys | 64  | FALSE | chr17:757<br>7099:C:T  | 119:chr17:<br>7577099:C<br>:T  | 0.00112  |
| 131_c1w2-1 | 131 | CDH1  | MODERATE           | c.2320A>G                                        | p.Arg774Gly                                                             | 0   | FALSE | chr16:688<br>63581:A:G | 119:chr16:<br>68863581:<br>A:G | 0.000998 |
| 131_c1w2-1 | 131 | NTRK1 | MODERATE           | c.804C>G;<br>c.894C>G                            | p.His268Gln<br>;<br>p.His298Gln                                         | 1   | FALSE | chr1:1568<br>43468:C:G | 119:chr1:1<br>56843468:<br>C:G | 0.001275 |
| 131_c1w2-1 | 131 | EPHA3 | MODERATE           | c.2051G>A                                        | p.Arg684Gln                                                             | 0   | FALSE | chr3:8946<br>8517:G:A  | 119:chr3:8<br>9468517:G<br>:A  | 0.00095  |
| 131_c1w2-1 | 131 | ERBB2 | MODERATE; MODIFIER | c.632C>T;<br>c.677C>T;<br>c.722C>T;<br>n.1046C>T | p.Ala211Val;<br>p.Ala226Val;<br>p.Ala241Val;                            | 2   | FALSE | chr17:378<br>66417:C:T | 119:chr17:<br>37866417:<br>C:T | 0.001018 |
| 131_c1w2-1 | 131 | DDR2  | MODERATE           | c.1022G>A                                        | p.Arg341Gln                                                             | 1   | FALSE | chr1:1627<br>31167:G:A | 119:chr1:1<br>62731167:<br>G:A | 0.000827 |
| 131_c1w2-1 | 131 | MET   | MODERATE           | c.3280C>T;<br>c.3334C>T                          | p.His1094Ty<br>r;<br>p.His1112Ty<br>r                                   | 4   | FALSE | chr7:1164<br>17463:C:T | 119:chr7:1<br>16417463:<br>C:T | 0.00104  |
| 131_c1w2-1 | 131 | EGFR  | MODERATE           | c.406C>A                                         | p.Pro136Thr                                                             | 1   | FALSE | chr7:5521<br>1163:C:A  | 119:chr7:5<br>5211163:C<br>:A  | 0.001344 |
| 131_c1w2-1 | 131 | DDR2  | MODERATE           | c.2516G>A                                        | p.Arg839His                                                             | 3   | FALSE | chr1:1627<br>49984:G:A | 119:chr1:1<br>62749984:<br>G:A | 0.000973 |
| 131_c1w2-1 | 131 | NTRK1 | MODERATE           | c.1975C>T;<br>c.2065C>T;<br>c.2083C>T            | p.Pro659Ser<br>;<br>p.Pro689Ser<br>;<br>p.Pro695Ser                     | 2   | FALSE | chr1:1568<br>49827:C:T | 119:chr1:1<br>56849827:<br>C:T | 0.001441 |
| 131_c1w2-1 | 131 | TP53  | HIGH               | c.439C>T;<br>c.520C>T;<br>c.799C>T;<br>c.916C>T  | p.Arg147*;<br>p.Arg174*;<br>p.Arg267*;<br>p.Arg306*                     | 167 | FALSE | chr17:757<br>7022:G:A  | 119:chr17:<br>7577022:G<br>:A  | 0.001076 |
| 131_c1w2-1 | 131 | IGF1R | MODERATE           | c.3905T>C;<br>c.3908T>C                          | p.Val1302Al<br>a;<br>p.Val1303Al<br>a                                   | 0   | FALSE | chr15:995<br>00475:T:C | 119:chr15:<br>99500475:<br>T:C | 0.012165 |
| 131_c1w2-1 | 131 | PTEN  | HIGH               | c.822G>A                                         | p.Trp274*                                                               | 3   | FALSE | chr10:897<br>20671:G:A | 119:chr10:<br>89720671:<br>G:A | 0.002317 |

|            |     |                            |                            |                                                                                                                      |                                                                    |     |       |                        |                                |          |
|------------|-----|----------------------------|----------------------------|----------------------------------------------------------------------------------------------------------------------|--------------------------------------------------------------------|-----|-------|------------------------|--------------------------------|----------|
| 131_c1w2-1 | 131 | GAPDH;<br>IFFO1;<br>NCAPD2 | MODERATE; MODIFIER         | c.148G>A;<br>c.274G>A;<br>c.*1743C><br>T;<br>c.*1746C><br>T;<br>c.*1770C><br>T;<br>n.*2798C><br>T;<br>c.*4252G><br>A | p.Ala50Thr;<br>p.Ala92Thr;                                         | 0   | FALSE | chr12:664<br>6123:G:A  | 119:chr12:<br>6646123:G<br>:A  | 0.001801 |
| 131_c1w2-1 | 131 | FGFR4                      | MODIFIER; MODERATE         | c.1193+43<br>C>T;<br>c.1270C>T;<br>c.1390C>T                                                                         | p.Arg424Trp<br>p.Arg464Trp                                         | 1   | FALSE | chr5:1765<br>20545:C:T | 119:chr5:1<br>76520545:<br>C:T | 0.001068 |
| 131_c1w2-1 | 131 | PIK3CA                     | MODERATE                   | c.1235G>A                                                                                                            | p.Arg412Gln                                                        | 1   | FALSE | chr3:1789<br>27472:G:A | 119:chr3:1<br>78927472:<br>G:A | 0.001627 |
| 131_c1w2-1 | 131 | PTEN                       | MODERATE                   | c.235G>A                                                                                                             | p.Ala79Thr                                                         | 3   | FALSE | chr10:896<br>90828:G:A | 119:chr10:<br>89690828:<br>G:A | 0.00114  |
| 131_c1w2-1 | 131 | TP53                       | MODERATE                   | c.257G>A;<br>c.338G>A;<br>c.617G>A;<br>c.734G>A                                                                      | p.Gly86Asp;<br>p.Gly113Asp<br>;<br>p.Gly206Asp<br>;<br>p.Gly245Asp | 126 | FALSE | chr17:757<br>7547:C:T  | 119:chr17:<br>7577547:C<br>:T  | 0.001644 |
| 131_c1w2-1 | 131 | DDR2                       | MODERATE                   | c.1418G>A                                                                                                            | p.Arg473His                                                        | 2   | FALSE | chr1:1627<br>40216:G:A | 119:chr1:1<br>62740216:<br>G:A | 0.000934 |
| 131_c1w2-1 | 131 | PTEN                       | MODERATE                   | c.133G>A                                                                                                             | p.Val45Ile                                                         | 1   | FALSE | chr10:896<br>53835:G:A | 119:chr10:<br>89653835:<br>G:A | 0.000984 |
| 131_c1w2-1 | 131 | MAP2K1                     | MODERATE                   | c.379G>A                                                                                                             | p.Val127Me<br>t                                                    | 1   | FALSE | chr15:667<br>29171:G:A | 119:chr15:<br>66729171:<br>G:A | 0.001352 |
| 131_c1w2-1 | 131 | APC                        | MODIFIER; MODERATE         | c.676-<br>8791C>T;<br>c.688C>T                                                                                       | p.Arg230Cys                                                        | 0   | FALSE | chr5:1121<br>28185:C:T | 119:chr5:1<br>12128185:<br>C:T | 0.001063 |
| 131_c1w2-1 | 131 | FGFR3                      | MODERATE                   | c.905G>A                                                                                                             | p.Gly302Asp                                                        | 1   | FALSE | chr4:1803<br>727:G:A   | 119:chr4:1<br>803727:G:<br>A   | 0.001229 |
| 131_c1w2-1 | 131 | RET                        | MODERATE                   | c.1690A>C                                                                                                            | p.Thr564Pro                                                        | 1   | FALSE | chr10:436<br>08342:A:C | 119:chr10:<br>43608342:<br>A:C | 0.069824 |
| 131_c1w2-1 | 131 | C9orf53;<br>CDKN2A         | MODIFIER; MODERATE;<br>LOW | n.*616T>G<br>;<br>c.*216A>C<br>;<br>c.293A>C;<br>c.336A>C                                                            | p.His98Pro;<br>p.Ala112Ala                                         | 2   | FALSE | chr9:2197<br>1065:T:G  | 119:chr9:2<br>1971065:T<br>:G  | 0.002831 |

|            |     |                    |                            |                                                                                                                                                           |                                                                                                                                                              |   |       |                             |                                 |          |
|------------|-----|--------------------|----------------------------|-----------------------------------------------------------------------------------------------------------------------------------------------------------|--------------------------------------------------------------------------------------------------------------------------------------------------------------|---|-------|-----------------------------|---------------------------------|----------|
| 131_c1w2-1 | 131 | C9orf53;<br>CDKN2A | MODIFIER; MODERATE;<br>LOW | n.*616G>A<br>;<br>c.*222C>T;<br>c.299C>T;<br>c.342C>T                                                                                                     | p.Ala100Val;<br>p.Gly114Gly                                                                                                                                  | 2 | FALSE | chr9:2197<br>1059:G:A       | 119:chr9:2<br>1971059:G<br>:A   | 0.001123 |
| 131_c1w2-1 | 131 | PIK3CA             | HIGH                       | c.3152G>A                                                                                                                                                 | p.Trp1051*                                                                                                                                                   | 3 | FALSE | chr3:1789<br>52097:G:A      | 119:chr3:1<br>78952097:<br>G:A  | 0.000881 |
| 131_c1w2-1 | 131 | PIK3CA             | MODERATE                   | c.3154A>G                                                                                                                                                 | p.Thr1052Ala                                                                                                                                                 | 3 | FALSE | chr3:1789<br>52099:A:G      | 119:chr3:1<br>78952099:<br>A:G  | 0.000889 |
| 131_c1w2-1 | 131 | CTNNB1             | MODERATE                   | c.1972G>T                                                                                                                                                 | p.Val658Phe                                                                                                                                                  | 0 | FALSE | chr3:4127<br>8096:G:T       | 119:chr3:4<br>1278096:G<br>:T   | 0.004569 |
| 131_c1w2-1 | 131 | NTRK1              | MODERATE                   | c.1940T>G<br>;<br>c.2030T>G<br>;<br>c.2048T>G                                                                                                             | p.Val647Gly;<br>p.Val677Gly;<br>p.Val683Gly                                                                                                                  | 2 | FALSE | chr1:1568<br>49792:T:G      | 119:chr1:1<br>56849792:<br>T:G  | 0.02069  |
| 131_c1w2-1 | 131 | DEAR;<br>FBXW7     | MODIFIER; HIGH             | n.108G>A;<br>c.475C>T;<br>c.589C>T;<br>c.829C>T                                                                                                           | ; p.Gln159*;<br>p.Gln197*;<br>p.Gln277*                                                                                                                      | 0 | FALSE | chr4:1532<br>58986:G:A      | 119:chr4:1<br>53258986:<br>G:A  | 0.001194 |
| 131_c1w2-1 | 131 | HRAS;<br>LRRC56    | MODERATE; MODIFIER         | c.368G>A;<br>c.-506C>T                                                                                                                                    | p.Arg123His<br>;                                                                                                                                             | 2 | FALSE | chr11:533<br>535:C:T        | 119:chr11:<br>533535:C:<br>T    | 0.00116  |
| 131_c1w2-1 | 131 | FGFR2              | MODERATE; MODIFIER         | c.1591G>A<br>;<br>c.1594G>A<br>;<br>c.1597G>A<br>;<br>c.1606G>A<br>;<br>c.1675G>A<br>;<br>c.1678G>A<br>;<br>c.1942G>A<br>;<br>c.1945G>A<br>;<br>n.2392G>A | p.Ala531Thr<br>;<br>p.Ala532Thr<br>;<br>p.Ala533Thr<br>;<br>p.Ala536Thr<br>;<br>p.Ala559Thr<br>;<br>p.Ala560Thr<br>;<br>p.Ala648Thr<br>;<br>p.Ala649Thr<br>; | 3 | FALSE | chr10:123<br>247549:C:<br>T | 119:chr10:<br>12324754<br>9:C:T | 0.001784 |
| 131_c1w2-1 | 131 | BRAF               | MODERATE                   | c.914C>T                                                                                                                                                  | p.Ala305Val                                                                                                                                                  | 2 | FALSE | chr7:1405<br>00228:G:A      | 119:chr7:1<br>40500228:<br>G:A  | 0.00225  |
| 131_c1w2-1 | 131 | CDKN2A             | MODIFIER; MODERATE         | c.194-<br>3537T>G;<br>c.83T>G                                                                                                                             | ; p.Val28Gly                                                                                                                                                 | 1 | FALSE | chr9:2197<br>4744:A:C       | 119:chr9:2<br>1974744:A<br>:C   | 0.075614 |
| 131_c1w2-1 | 131 | BRAF               | MODERATE                   | c.2083G>A                                                                                                                                                 | p.Glu695Lys                                                                                                                                                  | 2 | FALSE | chr7:1404<br>39656:C:T      | 119:chr7:1<br>40439656:<br>C:T  | 0.001065 |
| 131_c1w2-1 | 131 | SMO                | MODERATE                   | c.1045A>C                                                                                                                                                 | p.Thr349Pro                                                                                                                                                  | 0 | FALSE | chr7:1288<br>46115:A:C      | 119:chr7:1<br>28846115:<br>A:C  | 0.030697 |

|            |     |                |                    |                                                                                                                            |                                                            |    |       |                        |                                |          |
|------------|-----|----------------|--------------------|----------------------------------------------------------------------------------------------------------------------------|------------------------------------------------------------|----|-------|------------------------|--------------------------------|----------|
| 131_c1w2-1 | 131 | EPHA3          | MODERATE           | c.1516G>A                                                                                                                  | p.Val506Ile                                                | 0  | FALSE | chr3:8944<br>8552:G:A  | 119:chr3:8<br>9448552:G<br>:A  | 0.001123 |
| 131_c1w2-1 | 131 | CDKN2A         | MODIFIER; MODERATE | c.194-<br>3568A>C;<br>c.52A>C                                                                                              | ; p.Thr18Pro                                               | 1  | FALSE | chr9:2197<br>4775:T:G  | 119:chr9:2<br>1974775:T<br>:G  | 0.04665  |
| 131_c1w2-1 | 131 | NOTCH1         | MODERATE           | c.5033T>C                                                                                                                  | p.Leu1678Pro                                               | 0  | FALSE | chr9:1393<br>97768:A:G | 119:chr9:1<br>39397768:<br>A:G | 0.001414 |
| 131_c1w2-1 | 131 | IGF1R          | MODERATE           | c.3934T>C;<br>c.3937T>C                                                                                                    | p.Ser1312Pro;<br>p.Ser1313Pro                              | 0  | FALSE | chr15:995<br>00504:T:C | 119:chr15:<br>99500504:<br>T:C | 0.030199 |
| 131_c1w2-1 | 131 | CTNNB1         | MODERATE           | c.1166C>T                                                                                                                  | p.Ser389Leu                                                | 0  | FALSE | chr3:4127<br>4916:C:T  | 119:chr3:4<br>1274916:C<br>:T  | 0.000869 |
| 131_c1w2-1 | 131 | EGFR           | MODIFIER; MODERATE | c.*1464C><br>T;<br>c.1279C>T                                                                                               | ; p.Arg427Cys                                              | 2  | FALSE | chr7:5522<br>5427:C:T  | 119:chr7:5<br>5225427:C<br>:T  | 0.00099  |
| 131_c1w2-1 | 131 | TP53           | MODERATE           | c.254G>T;<br>c.335G>T;<br>c.614G>T;<br>c.731G>T                                                                            | p.Gly85Val;<br>p.Gly112Val;<br>p.Gly205Val;<br>p.Gly244Val | 44 | FALSE | chr17:757<br>7550:C:A  | 119:chr17:<br>7577550:C<br>:A  | 0.001065 |
| 131_c1w2-1 | 131 | EGFR           | MODIFIER; MODERATE | c.*2364T><br>C;<br>c.2195T>C                                                                                               | ; p.Ile732Thr                                              | 1  | FALSE | chr7:5524<br>2425:T:C  | 119:chr7:5<br>5242425:T<br>:C  | 0.001012 |
| 131_c1w2-1 | 131 | NOTCH1         | MODERATE           | c.4984C>T                                                                                                                  | p.Arg1662Trp                                               | 0  | FALSE | chr9:1393<br>99159:G:A | 119:chr9:1<br>39399159:<br>G:A | 0.001319 |
| 131_c1w2-1 | 131 | FGFR4          | MODERATE           | c.1978G>A<br>;<br>c.2062G>A<br>;<br>c.2182G>A                                                                              | p.Ala660Thr<br>;<br>p.Ala688Thr<br>;<br>p.Ala728Thr        | 1  | FALSE | chr5:1765<br>24321:G:A | 119:chr5:1<br>76524321:<br>G:A | 0.001351 |
| 131_c1w2-1 | 131 | TSC2           | MODERATE           | c.3032G>A<br>;<br>c.3164G>A                                                                                                | p.Gly1011Asp;<br>p.Gly1055Asp                              | 0  | FALSE | chr16:212<br>9309:G:A  | 119:chr16:<br>2129309:G<br>:A  | 0.001197 |
| 131_c1w2-1 | 131 | CSDE1;<br>NRAS | MODIFIER; MODERATE | c.*2430C><br>T;<br>c.*2523C><br>T;<br>c.*2817C><br>T;<br>c.*2910C><br>T;<br>c.*2964C><br>T;<br>c.*3057C><br>T;<br>c.173C>T | ; p.Thr58Ile                                               | 1  | FALSE | chr1:1152<br>56538:G:A | 119:chr1:1<br>15256538:<br>G:A | 0.001208 |
| 131_c1w2-1 | 131 | SMO            | MODERATE           | c.799C>T                                                                                                                   | p.Leu267Phe                                                | 0  | FALSE | chr7:1288<br>45502:C:T | 119:chr7:1<br>28845502:<br>C:T | 0.001103 |

|            |     |                 |                    |                                                                 |                                                          |     |       |                        |                                |          |
|------------|-----|-----------------|--------------------|-----------------------------------------------------------------|----------------------------------------------------------|-----|-------|------------------------|--------------------------------|----------|
| 131_c1w2-1 | 131 | NTRK3           | MODERATE           | c.1420C>T;<br>c.1444C>T                                         | p.His474Tyr;<br>p.His482Tyr                              | 0   | FALSE | chr15:885<br>76229:G:A | 119:chr15:<br>88576229:<br>G:A | 0.001274 |
| 131_c1w2-1 | 131 | STK11           | MODERATE           | c.455A>G                                                        | p.Gln152Arg                                              | 3   | FALSE | chr19:121<br>9403:A:G  | 119:chr19:<br>1219403:A<br>:G  | 0.002349 |
| 131_c1w2-1 | 131 | EPHA3           | MODERATE           | c.1142G>A                                                       | p.Arg381His                                              | 0   | FALSE | chr3:8939<br>1076:G:A  | 119:chr3:8<br>9391076:G<br>:A  | 0.000891 |
| 131_c1w2-1 | 131 | NOTCH1          | MODERATE           | c.5777G>A                                                       | p.Arg1926His                                             | 0   | FALSE | chr9:1393<br>95161:C:T | 119:chr9:1<br>39395161:<br>C:T | 0.001236 |
| 131_c1w2-1 | 131 | CWH43           | MODERATE           | c.1535G>A<br>;<br>c.1616G>A                                     | p.Gly512Asp<br>;<br>p.Gly539Asp                          | 0   | FALSE | chr4:4903<br>4690:G:A  | 119:chr4:4<br>9034690:G<br>:A  | 0.000965 |
| 131_c1w2-1 | 131 | NOTCH1          | MODERATE           | c.3859C>T                                                       | p.Arg1287Cys                                             | 0   | FALSE | chr9:1394<br>01210:G:A | 119:chr9:1<br>39401210:<br>G:A | 0.001151 |
| 131_c1w2-1 | 131 | NF1             | HIGH               | c.3916C>T                                                       | p.Arg1306*                                               | 8   | FALSE | chr17:295<br>62981:C:T | 119:chr17:<br>29562981:<br>C:T | 0.000823 |
| 131_c1w2-1 | 131 | MITF            | MODERATE           | c.127A>C;<br>c.235A>C;<br>c.280A>C;<br>c.283A>C                 | p.Thr43Pro;<br>p.Thr79Pro;<br>p.Thr94Pro;<br>p.Thr95Pro  | 0   | FALSE | chr3:6992<br>8463:A:C  | 119:chr3:6<br>9928463:A<br>:C  | 0.165873 |
| 131_c1w2-1 | 131 | NOTCH1          | MODERATE           | c.4918G>A                                                       | p.Ala1640Thr                                             | 0   | FALSE | chr9:1393<br>99225:C:T | 119:chr9:1<br>39399225:<br>C:T | 0.001862 |
| 131_c1w2-1 | 131 | IDH1            | MODERATE           | c.394C>T                                                        | p.Arg132Cys                                              | 626 | FALSE | chr2:2091<br>13113:G:A | 119:chr2:2<br>09113113:<br>G:A | 0.003279 |
| 131_c1w2-1 | 131 | IDH2;<br>ZNF710 | LOW; MODIFIER      | c.1023G>A<br>;<br>c.1179G>A<br>;<br>c.789G>A;<br>c.*2147C><br>T | p.Arg341Arg<br>;<br>p.Arg393Arg<br>;<br>p.Arg263Arg<br>; | 1   | FALSE | chr15:906<br>28140:C:T | 119:chr15:<br>90628140:<br>C:T | 0.001185 |
| 131_c1w2-1 | 131 | KIT             | MODERATE           | c.365G>A                                                        | p.Arg122His                                              | 1   | FALSE | chr4:5556<br>4477:G:A  | 119:chr4:5<br>5564477:G<br>:A  | 0.001507 |
| 131_c1w2-1 | 131 | NOTCH1          | MODERATE           | c.5347C>T                                                       | p.Arg1783Trp                                             | 0   | FALSE | chr9:1393<br>96761:G:A | 119:chr9:1<br>39396761:<br>G:A | 0.001601 |
| 131_c1w2-1 | 131 | EPHA3           | MODERATE           | c.1672G>A                                                       | p.Val558Ile                                              | 0   | FALSE | chr3:8945<br>6496:G:A  | 119:chr3:8<br>9456496:G<br>:A  | 0.000946 |
| 131_c1w2-1 | 131 | NF1             | MODERATE           | c.2695T>G                                                       | p.Leu899Val                                              | 3   | FALSE | chr17:295<br>56328:T:G | 119:chr17:<br>29556328:<br>T:G | 0.045144 |
| 131_c1w2-1 | 131 | CDKN2A          | MODIFIER; MODERATE | c.194-<br>3546T>G;<br>c.74T>G                                   | ; p.Val25Gly                                             | 2   | FALSE | chr9:2197<br>4753:A:C  | 119:chr9:2<br>1974753:A<br>:C  | 0.198413 |



|            |     |        |                    |                                                      |                                                                         |   |       |                             |                                 |          |
|------------|-----|--------|--------------------|------------------------------------------------------|-------------------------------------------------------------------------|---|-------|-----------------------------|---------------------------------|----------|
| 131_c1w2-1 | 131 | SMO    | MODERATE           | c.869G>A                                             | p.Arg290His                                                             | 0 | FALSE | chr7:1288<br>45572:G:A      | 119:chr7:1<br>28845572:<br>G:A  | 0.001149 |
| 111_c3-1   | 111 | CDKN2A | MODIFIER; MODERATE | c.194-<br>3568A>C;<br>c.52A>C                        | ; p.Thr18Pro                                                            | 1 | FALSE | chr9:2197<br>4775:T:G       | 120:chr9:2<br>1974775:T<br>:G   | 0.030075 |
| 111_c3-1   | 111 | PIK3R1 | MODERATE           | c.1715A>G<br>;<br>c.626A>G;<br>c.815A>G;<br>c.905A>G | p.Gln572Arg<br>;<br>p.Gln209Arg<br>;<br>p.Gln272Arg<br>;<br>p.Gln302Arg | 1 | FALSE | chr5:6759<br>1122:A:G       | 120:chr5:6<br>7591122:A<br>:G   | 0.001565 |
| 111_c3-1   | 111 | PIK3CA | MODERATE           | c.3034G>A                                            | p.Glu1012Lys                                                            | 2 | FALSE | chr3:1789<br>51979:G:A      | 120:chr3:1<br>78951979:<br>G:A  | 0.001294 |
| 111_c3-1   | 111 | ATM    | MODERATE           | c.2075G>A                                            | p.Arg692His                                                             | 0 | FALSE | chr11:108<br>124717:G:<br>A | 120:chr11:<br>10812471<br>7:G:A | 0.001354 |
| 111_c3-1   | 111 | NF1    | MODERATE           | c.7583C>T;<br>c.7646C>T                              | p.Ser2528Leu;<br>p.Ser2549Leu                                           | 3 | FALSE | chr17:296<br>83508:C:T      | 120:chr17:<br>29683508:<br>C:T  | 0.001365 |
| 111_c3-1   | 111 | CDKN2A | MODIFIER; MODERATE | c.194-<br>3537T>G;<br>c.83T>G                        | ; p.Val28Gly                                                            | 1 | FALSE | chr9:2197<br>4744:A:C       | 120:chr9:2<br>1974744:A<br>:C   | 0.06192  |
| 111_c3-1   | 111 | EGFR   | MODERATE           | c.787A>C                                             | p.Thr263Pro                                                             | 6 | FALSE | chr7:5522<br>1743:A:C       | 120:chr7:5<br>5221743:A<br>:C   | 0.001591 |
| 111_c3-1   | 111 | SMO    | MODERATE           | c.1045A>C                                            | p.Thr349Pro                                                             | 0 | FALSE | chr7:1288<br>46115:A:C      | 120:chr7:1<br>28846115:<br>A:C  | 0.034783 |
| 111_c3-1   | 111 | PIK3R1 | MODERATE           | c.1768C>T;<br>c.679C>T;<br>c.868C>T;<br>c.958C>T     | p.Arg590Trp<br>;<br>p.Arg227Trp<br>;<br>p.Arg290Trp<br>;<br>p.Arg320Trp | 1 | FALSE | chr5:6759<br>1270:C:T       | 120:chr5:6<br>7591270:C<br>:T   | 0.002532 |
| 111_c3-1   | 111 | NTRK3  | MODERATE           | c.560T>C                                             | p.Leu187Pro                                                             | 0 | FALSE | chr15:886<br>80697:A:G      | 120:chr15:<br>88680697:<br>A:G  | 0.002534 |
| 111_c3-1   | 111 | MET    | HIGH               | c.1619G>A                                            | p.Trp540*                                                               | 1 | FALSE | chr7:1163<br>80997:G:A      | 120:chr7:1<br>16380997:<br>G:A  | 0.001276 |
| 111_c3-1   | 111 | GNA11  | MODERATE           | c.805G>A                                             | p.Val269Ile                                                             | 1 | FALSE | chr19:311<br>9273:G:A       | 120:chr19:<br>3119273:G<br>:A   | 0.001808 |
| 111_c3-1   | 111 | SMO    | MODERATE           | c.508A>C                                             | p.Thr170Pro                                                             | 0 | FALSE | chr7:1288<br>43401:A:C      | 120:chr7:1<br>28843401:<br>A:C  | 0.001663 |
| 111_c3-1   | 111 | TP53   | MODERATE           | c.280A>C;<br>c.361A>C;<br>c.640A>C;<br>c.757A>C      | p.Thr94Pro;<br>p.Thr121Pro<br>;<br>p.Thr214Pro<br>;<br>p.Thr253Pro      | 9 | FALSE | chr17:757<br>7524:T:G       | 120:chr17:<br>7577524:T<br>:G   | 0.008737 |

|          |     |                           |                            |                                                           |                                             |   |       |                    |                        |          |
|----------|-----|---------------------------|----------------------------|-----------------------------------------------------------|---------------------------------------------|---|-------|--------------------|------------------------|----------|
| 111_c3-1 | 111 | CDKN2A                    | MODIFIER; MODERATE         | c.194-3570C>G;<br>c.50C>G                                 | ; p.Ala17Gly                                | 1 | FALSE | chr9:21974777:G:C  | 120:chr9:21974777:G:C  | 0.002506 |
| 111_c3-1 | 111 | TP53                      | MODERATE; MODIFIER         | c.230C>T;<br>c.347C>T;<br>c.-279C>T;<br>c.-360C>T         | p.Ser77Phe;<br>p.Ser116Phe                  | 1 | FALSE | chr17:7579340:G:A  | 120:chr17:7579340:G:A  | 0.001672 |
| 111_c3-1 | 111 | CDKN2A;<br>CDKN2B-<br>AS1 | MODERATE; MODIFIER         | c.22A>G;<br>n.-1T>C                                       | p.Thr8Ala;                                  | 1 | FALSE | chr9:21994309:T:C  | 120:chr9:21994309:T:C  | 0.005348 |
| 111_c3-1 | 111 | C9orf53;<br>CDKN2A        | MODIFIER; MODERATE;<br>LOW | n.*616T>G<br>;<br>c.*120A>C<br>;<br>c.197A>C;<br>c.240A>C | p.His66Pro;<br>p.Pro80Pro                   | 1 | FALSE | chr9:21971161:T:G  | 120:chr9:21971161:T:G  | 0.095137 |
| 111_c3-1 | 111 | ESR1                      | MODERATE                   | c.739G>A;<br>c.745G>A                                     | p.Glu247Lys<br>;<br>p.Glu249Lys             | 0 | FALSE | chr6:152201885:G:A | 120:chr6:152201885:G:A | 0.001514 |
| 111_c3-1 | 111 | EPHA3                     | MODERATE                   | c.608C>T                                                  | p.Pro203Leu                                 | 0 | FALSE | chr3:89259464:C:T  | 120:chr3:89259464:C:T  | 0.001423 |
| 111_c3-1 | 111 | PDGFRA                    | LOW                        | c.2001A>G                                                 | p.Ser667Ser                                 | 2 | FALSE | chr4:55144172:A:G  | 120:chr4:55144172:A:G  | 0.002532 |
| 111_c3-1 | 111 | AR                        | MODERATE                   | c.2086G>A<br>; c.490G>A                                   | p.Asp696Asn;<br>p.Asp164Asn                 | 0 | FALSE | chrX:66931444:G:A  | 120:chrX:66931444:G:A  | 0.00141  |
| 111_c3-1 | 111 | NTRK1                     | MODERATE                   | c.804C>G;<br>c.894C>G                                     | p.His268Gln<br>;<br>p.His298Gln             | 1 | FALSE | chr1:156843468:C:G | 120:chr1:156843468:C:G | 0.004278 |
| 111_c3-1 | 111 | KIT                       | MODERATE                   | c.2573T>C;<br>c.2585T>C                                   | p.Leu858Pro<br>;<br>p.Leu862Pro             | 1 | FALSE | chr4:55602764:T:C  | 120:chr4:55602764:T:C  | 0.001364 |
| 111_c3-1 | 111 | KIT                       | MODERATE                   | c.1156G>A                                                 | p.Glu386Lys                                 | 1 | FALSE | chr4:55575630:G:A  | 120:chr4:55575630:G:A  | 0.001558 |
| 111_c3-1 | 111 | NTRK1                     | MODERATE                   | c.1940T>G<br>;<br>c.2030T>G<br>;<br>c.2048T>G             | p.Val647Gly;<br>p.Val677Gly;<br>p.Val683Gly | 2 | FALSE | chr1:156849792:T:G | 120:chr1:156849792:T:G | 0.029024 |
| 111_c3-1 | 111 | EPHA3                     | MODERATE                   | c.1535G>A                                                 | p.Arg512Gln                                 | 0 | FALSE | chr3:89448571:G:A  | 120:chr3:89448571:G:A  | 0.001519 |
| 111_c3-1 | 111 | PIK3CA                    | MODERATE                   | c.193G>A                                                  | p.Glu65Lys                                  | 1 | FALSE | chr3:178916806:G:A | 120:chr3:178916806:G:A | 0.001383 |

|          |     |                    |                            |                                                                               |                                                                         |    |       |                        |                                |          |
|----------|-----|--------------------|----------------------------|-------------------------------------------------------------------------------|-------------------------------------------------------------------------|----|-------|------------------------|--------------------------------|----------|
| 111_c3-1 | 111 | TP53               | MODERATE                   | c.268A>G;<br>c.349A>G;<br>c.628A>G;<br>c.745A>G                               | p.Arg90Gly;<br>p.Arg117Gly<br>;<br>p.Arg210Gly<br>;<br>p.Arg249Gly      | 36 | FALSE | chr17:757<br>7536:T:C  | 120:chr17:<br>7577536:T<br>:C  | 0.004026 |
| 111_c3-1 | 111 | C9orf53;<br>CDKN2A | MODIFIER; MODERATE;<br>LOW | n.*616G>A<br>;<br>c.*222C>T;<br>c.299C>T;<br>c.342C>T                         | p.Ala100Val;<br>p.Gly114Gly                                             | 2  | FALSE | chr9:2197<br>1059:G:A  | 120:chr9:2<br>1971059:G<br>:A  | 0.001986 |
| 111_c3-1 | 111 | FGFR3              | MODERATE                   | c.1183G>A<br>;<br>c.1519G>A<br>;<br>c.1525G>A                                 | p.Val395Me<br>t;<br>p.Val507Me<br>t;<br>p.Val509Me<br>t                 | 1  | FALSE | chr4:1807<br>188:G:A   | 120:chr4:1<br>807188:G:<br>A   | 0.002193 |
| 111_c3-1 | 111 | APC                | HIGH                       | c.850C>T;<br>c.904C>T                                                         | p.Arg284*;<br>p.Arg302*                                                 | 0  | FALSE | chr5:1121<br>51261:C:T | 120:chr5:1<br>12151261:<br>C:T | 0.001322 |
| 111_c3-1 | 111 | TP53               | MODIFIER; MODERATE         | c.*145T>C;<br>c.*233T>C;<br>c.1009T>C;<br>c.1126T>C;<br>c.649T>C;<br>c.730T>C | p.Ser337Pro<br>;<br>p.Ser376Pro<br>;<br>p.Ser217Pro<br>;<br>p.Ser244Pro | 2  | FALSE | chr17:757<br>2983:A:G  | 120:chr17:<br>7572983:A<br>:G  | 0.005405 |
| 111_c3-1 | 111 | PTEN               | MODERATE                   | c.1123G>A                                                                     | p.Asp375As<br>n                                                         | 3  | FALSE | chr10:897<br>25140:G:A | 120:chr10:<br>89725140:<br>G:A | 0.001885 |
| 111_c3-1 | 111 | KDR                | MODERATE                   | c.2323G>T                                                                     | p.Ala775Ser                                                             | 1  | FALSE | chr4:5596<br>4914:C:A  | 120:chr4:5<br>5964914:C<br>:A  | 0.01115  |
| 111_c3-1 | 111 | NOTCH1             | MODERATE                   | c.4733T>G                                                                     | p.Val1578Gl<br>y                                                        | 0  | FALSE | chr9:1393<br>99410:A:C | 120:chr9:1<br>39399410:<br>A:C | 0.004065 |
| 111_c3-1 | 111 | KRAS               | MODIFIER; MODERATE         | c.451-<br>5609G>A;<br>c.491G>A                                                | p.Arg164Gln                                                             | 1  | FALSE | chr12:253<br>68454:C:T | 120:chr12:<br>25368454:<br>C:T | 0.001225 |
| 111_c3-1 | 111 | TP53               | MODERATE                   | c.119T>G;<br>c.38T>G;<br>c.398T>G;<br>c.515T>G                                | p.Val40Gly;<br>p.Val13Gly;<br>p.Val133Gly;<br>p.Val172Gly               | 12 | FALSE | chr17:757<br>8415:A:C  | 120:chr17:<br>7578415:A<br>:C  | 0.001821 |
| 111_c3-1 | 111 | VHL                | MODIFIER; MODERATE         | c.341-<br>3270A>C;<br>c.344A>C                                                | p.His115Pro                                                             | 0  | FALSE | chr3:1018<br>8201:A:C  | 120:chr3:1<br>0188201:A<br>:C  | 0.001864 |

|          |     |                    |                    |                                                                                                       |                                                                                                                                     |    |       |                             |                                 |          |
|----------|-----|--------------------|--------------------|-------------------------------------------------------------------------------------------------------|-------------------------------------------------------------------------------------------------------------------------------------|----|-------|-----------------------------|---------------------------------|----------|
| 111_c3-1 | 111 | NRAS               | MODERATE           | c.317C>T                                                                                              | p.Ser106Leu                                                                                                                         | 1  | FALSE | chr1:1152<br>52323:G:A      | 120:chr1:1<br>15252323:<br>G:A  | 0.00189  |
| 80_c6-1  | 80  | RET                | MODERATE           | c.1690A>C                                                                                             | p.Thr564Pro                                                                                                                         | 1  | FALSE | chr10:436<br>08342:A:C      | 121:chr10:<br>43608342:<br>A:C  | 0.044542 |
| 80_c6-1  | 80  | PTEN               | MODERATE           | c.133G>A                                                                                              | p.Val45Ile                                                                                                                          | 1  | FALSE | chr10:896<br>53835:G:A      | 121:chr10:<br>89653835:<br>G:A  | 0.001232 |
| 80_c6-1  | 80  | TP53               | MODERATE           | c.145C>T;<br>c.424C>T;<br>c.541C>T;<br>c.64C>T                                                        | p.Arg49Cys;<br>p.Arg142Cys<br>;<br>p.Arg181Cys<br>; p.Arg22Cys                                                                      | 21 | FALSE | chr17:757<br>8389:G:A       | 121:chr17:<br>7578389:G<br>:A   | 0.001637 |
| 80_c6-1  | 80  | ATM                | MODERATE           | c.3925G>A                                                                                             | p.Ala1309Thr                                                                                                                        | 0  | FALSE | chr11:108<br>155132:G:<br>A | 121:chr11:<br>10815513<br>2:G:A | 0.001198 |
| 80_c6-1  | 80  | CTNNB1             | MODERATE           | c.1345C>T                                                                                             | p.Arg449Cys                                                                                                                         | 0  | FALSE | chr3:4127<br>5179:C:T       | 121:chr3:4<br>1275179:C<br>:T   | 0.001022 |
| 80_c6-1  | 80  | MIR4673;<br>NOTCH1 | MODIFIER; MODERATE | n.*59A>C;<br>c.1195A>C                                                                                | p.Thr399Pro                                                                                                                         | 0  | FALSE | chr9:1394<br>12649:T:G      | 121:chr9:1<br>39412649:<br>T:G  | 0.005084 |
| 80_c6-1  | 80  | TSC2               | MODIFIER; MODERATE | c.2837+11<br>08G>A;<br>c.2933G>A                                                                      | p.Arg978His                                                                                                                         | 0  | FALSE | chr16:212<br>7694:G:A       | 121:chr16:<br>2127694:G<br>:A   | 0.0012   |
| 80_c6-1  | 80  | MITF               | MODERATE           | c.1091G>A<br>;<br>c.1136G>A<br>;<br>c.1139G>A<br>;<br>c.650G>A;<br>c.818G>A;<br>c.836G>A;<br>c.983G>A | p.Arg364Gln<br>;<br>p.Arg379Gln<br>;<br>p.Arg380Gln<br>;<br>p.Arg217Gln<br>;<br>p.Arg273Gln<br>;<br>p.Arg279Gln<br>;<br>p.Arg328Gln | 0  | FALSE | chr3:7000<br>8549:G:A       | 121:chr3:7<br>0008549:G<br>:A   | 0.001189 |
| 80_c6-1  | 80  | FGFR1              | MODERATE           | c.359C>T;<br>c.365C>T;<br>c.608C>T;<br>c.626C>T;<br>c.632C>T;<br>c.725C>T                             | p.Ala120Val;<br>p.Ala122Val;<br>p.Ala203Val;<br>p.Ala209Val;<br>p.Ala211Val;<br>p.Ala242Val                                         | 1  | FALSE | chr8:3828<br>3753:G:A       | 121:chr8:3<br>8283753:G<br>:A   | 0.001127 |
| 80_c6-1  | 80  | KDR                | MODERATE           | c.1028C>T                                                                                             | p.Thr343Met                                                                                                                         | 3  | FALSE | chr4:5597<br>6884:G:A       | 121:chr4:5<br>5976884:G<br>:A   | 0.000867 |

|         |    |                    |                            |                                                                               |                                                                         |   |       |                             |                                 |          |
|---------|----|--------------------|----------------------------|-------------------------------------------------------------------------------|-------------------------------------------------------------------------|---|-------|-----------------------------|---------------------------------|----------|
| 80_c6-1 | 80 | NF1                | MODERATE                   | c.2695T>G                                                                     | p.Leu899Val                                                             | 3 | FALSE | chr17:295<br>56328:T:G      | 121:chr17:<br>29556328:<br>T:G  | 0.012696 |
| 80_c6-1 | 80 | IGF1R              | MODERATE                   | c.3934T>C;<br>c.3937T>C                                                       | p.Ser1312Pro;<br>p.Ser1313Pro                                           | 0 | FALSE | chr15:995<br>00504:T:C      | 121:chr15:<br>99500504:<br>T:C  | 0.032875 |
| 80_c6-1 | 80 | C9orf53;<br>CDKN2A | MODIFIER; MODERATE         | n.*616C>G<br>;<br>c.*140G>C<br>;<br>c.217G>C;<br>c.260G>C                     | p.Ala73Pro;<br>p.Arg87Pro                                               | 1 | FALSE | chr9:2197<br>1141:C:G       | 121:chr9:2<br>1971141:C<br>:G   | 0.005128 |
| 80_c6-1 | 80 | NOTCH1             | MODERATE                   | c.3859C>T                                                                     | p.Arg1287Cys                                                            | 0 | FALSE | chr9:1394<br>01210:G:A      | 121:chr9:1<br>39401210:<br>G:A  | 0.001979 |
| 80_c6-1 | 80 | FBXW7              | MODERATE                   | c.1090A>C<br>;<br>c.1204A>C<br>;<br>c.1444A>C                                 | p.Thr364Pro<br>;<br>p.Thr402Pro<br>;<br>p.Thr482Pro                     | 0 | FALSE | chr4:1532<br>47358:T:G      | 121:chr4:1<br>53247358:<br>T:G  | 0.001075 |
| 80_c6-1 | 80 | CDH1               | MODERATE                   | c.68A>G                                                                       | p.Gln23Arg                                                              | 0 | FALSE | chr16:687<br>72219:A:G      | 121:chr16:<br>68772219:<br>A:G  | 0.001153 |
| 80_c6-1 | 80 | EGFR               | MODERATE                   | c.719G>A                                                                      | p.Cys240Tyr                                                             | 1 | FALSE | chr7:5522<br>0329:G:A       | 121:chr7:5<br>5220329:G<br>:A   | 0.001736 |
| 80_c6-1 | 80 | ALK                | MODERATE                   | c.1307C>T                                                                     | p.Ala436Val                                                             | 1 | FALSE | chr2:2955<br>1323:G:A       | 121:chr2:2<br>9551323:G<br>:A   | 0.001397 |
| 80_c6-1 | 80 | C9orf53;<br>CDKN2A | MODIFIER; MODERATE;<br>LOW | n.*616T>G<br>;<br>c.*120A>C<br>;<br>c.197A>C;<br>c.240A>C                     | p.His66Pro;<br>p.Pro80Pro                                               | 1 | FALSE | chr9:2197<br>1161:T:G       | 121:chr9:2<br>1971161:T<br>:G   | 0.052345 |
| 80_c6-1 | 80 | FGFR2              | MODIFIER; MODERATE         | c.110-<br>14065C>T;<br>c.110-<br>945C>T;<br>n.757-<br>14065C>T;<br>c.290C>T   | p.Ala97Val                                                              | 1 | FALSE | chr10:123<br>325038:G:<br>A | 121:chr10:<br>12332503<br>8:G:A | 0.001201 |
| 80_c6-1 | 80 | TP53               | MODIFIER; MODERATE         | c.*145T>C;<br>c.*233T>C;<br>c.1009T>C;<br>c.1126T>C;<br>c.649T>C;<br>c.730T>C | p.Ser337Pro<br>;<br>p.Ser376Pro<br>;<br>p.Ser217Pro<br>;<br>p.Ser244Pro | 2 | FALSE | chr17:757<br>2983:A:G       | 121:chr17:<br>7572983:A<br>:G   | 0.00431  |

|         |    |                             |                            |                                                                               |                                                             |    |       |                    |                        |          |
|---------|----|-----------------------------|----------------------------|-------------------------------------------------------------------------------|-------------------------------------------------------------|----|-------|--------------------|------------------------|----------|
| 80_c6-1 | 80 | ROS1                        | MODERATE                   | c.5827G>A                                                                     | p.Glu1943Lys                                                | 1  | FALSE | chr6:117641144:C:T | 121:chr6:17641144:C:T  | 0.001074 |
| 80_c6-1 | 80 | NTRK2                       | MODERATE                   | c.220G>A                                                                      | p.Ala74Thr                                                  | 0  | FALSE | chr9:87317081:G:A  | 121:chr9:87317081:G:A  | 0.001323 |
| 80_c6-1 | 80 | TP53                        | MODIFIER; MODERATE         | c.*182C>T;<br>c.*94C>T;<br>c.1075C>T;<br>c.598C>T;<br>c.679C>T;<br>c.958C>T   | p.Pro359Ser;<br>p.Pro200Ser;<br>p.Pro227Ser;<br>p.Pro320Ser | 1  | FALSE | chr17:7573952:G:A  | 121:chr17:7573952:G:A  | 0.001013 |
| 80_c6-1 | 80 | NOTCH1                      | MODERATE                   | c.4733T>G                                                                     | p.Val1578Gly                                                | 0  | FALSE | chr9:139399410:A:C | 121:chr9:139399410:A:C | 0.001559 |
| 80_c6-1 | 80 | FBXW7                       | MODERATE                   | c.1391C>T;<br>c.1505C>T;<br>c.1745C>T                                         | p.Ser464Leu;<br>p.Ser502Leu;<br>p.Ser582Leu                 | 0  | FALSE | chr4:153245446:G:A | 121:chr4:153245446:G:A | 0.001292 |
| 80_c6-1 | 80 | TSC2                        | MODERATE                   | c.1654G>A                                                                     | p.Ala552Thr                                                 | 0  | FALSE | chr16:2115574:G:A  | 121:chr16:2115574:G:A  | 0.001202 |
| 80_c6-1 | 80 | C9orf53;<br>CDKN2A          | MODIFIER; MODERATE;<br>LOW | n.*616C>T;<br>c.*232G>A;<br>c.352G>A;<br>c.309G>A                             | p.Ala118Thr;<br>p.Arg103Arg                                 | 1  | FALSE | chr9:21971049:C:T  | 121:chr9:21971049:C:T  | 0.001138 |
| 80_c6-1 | 80 | EGFR                        | HIGH                       | c.3202C>T                                                                     | p.Arg1068*                                                  | 1  | FALSE | chr7:55270249:C:T  | 121:chr7:55270249:C:T  | 0.001581 |
| 80_c6-1 | 80 | PTEN                        | MODERATE                   | c.828T>A                                                                      | p.Asn276Lys                                                 | 1  | FALSE | chr10:89720677:T:A | 121:chr10:89720677:T:A | 0.001689 |
| 80_c6-1 | 80 | ERBB2;<br>MIEN1;<br>MIR4728 | MODERATE; MODIFIER         | c.2434G>A;<br>c.2479G>A;<br>c.2524G>A;<br>n.2848G>A;<br>c.*388C>T;<br>n.-1G>A | p.Val812Ile;<br>p.Val827Ile;<br>p.Val842Ile;                | 17 | FALSE | chr17:37881332:G:A | 121:chr17:37881332:G:A | 0.001135 |

|         |    |                           |                    |                                                                                                                                                           |                                                                                                                              |   |       |                             |                                 |          |
|---------|----|---------------------------|--------------------|-----------------------------------------------------------------------------------------------------------------------------------------------------------|------------------------------------------------------------------------------------------------------------------------------|---|-------|-----------------------------|---------------------------------|----------|
| 80_c6-1 | 80 | MIR1225;<br>PKD1;<br>TSC2 | MODIFIER; MODERATE | n.*90C>T;<br>c.*13118C<br>>T;<br>c.*13121C<br>>T;<br>c.4715G>A<br>;<br>c.4847G>A<br>;<br>c.4916G>A                                                        | p.Arg1572His;<br>p.Arg1616His;<br>p.Arg1639His                                                                               | 0 | FALSE | chr16:213<br>6799:G:A       | 121:chr16:<br>2136799:G<br>:A   | 0.001097 |
| 80_c6-1 | 80 | FGFR2                     | MODERATE; MODIFIER | c.1859G>T<br>;<br>c.1862G>T<br>;<br>c.1865G>T<br>;<br>c.1874G>T<br>;<br>c.1943G>T<br>;<br>c.1946G>T<br>;<br>c.2210G>T<br>;<br>c.2213G>T<br>;<br>n.2660G>T | p.Arg620Met;<br>p.Arg621Met;<br>p.Arg622Met;<br>p.Arg625Met;<br>p.Arg648Met;<br>p.Arg649Met;<br>p.Arg737Met;<br>p.Arg738Met; | 1 | FALSE | chr10:123<br>243303:C:<br>A | 121:chr10:<br>12324330<br>3:C:A | 0.001329 |
| 80_c6-1 | 80 | MET                       | MODERATE           | c.487T>C                                                                                                                                                  | p.Ser163Pro                                                                                                                  | 1 | FALSE | chr7:1163<br>39625:T:C      | 121:chr7:1<br>16339625:<br>T:C  | 0.001479 |
| 80_c6-1 | 80 | PIK3R1                    | MODERATE           | c.1226G>A<br>;<br>c.137G>A;<br>c.326G>A;<br>c.416G>A                                                                                                      | p.Arg409Gln<br>;<br>p.Arg46Gln;<br>p.Arg109Gln<br>;<br>p.Arg139Gln                                                           | 1 | FALSE | chr5:6758<br>9238:G:A       | 121:chr5:6<br>7589238:G<br>:A   | 0.001228 |
| 80_c6-1 | 80 | PDGFRA                    | MODERATE           | c.1499G>A                                                                                                                                                 | p.Arg500Gln                                                                                                                  | 1 | FALSE | chr4:5513<br>9838:G:A       | 121:chr4:5<br>5139838:G<br>:A   | 0.001087 |
| 80_c6-1 | 80 | IDH2;<br>ZNF710           | MODERATE; MODIFIER | c.1091C>T;<br>c.1247C>T;<br>c.857C>T;<br>c.*2147G><br>A                                                                                                   | p.Ala364Val;<br>p.Ala416Val;<br>p.Ala286Val;                                                                                 | 1 | FALSE | chr15:906<br>28072:G:A      | 121:chr15:<br>90628072:<br>G:A  | 0.001158 |
| 80_c6-1 | 80 | IGF1R                     | HIGH               | c.2716C>T                                                                                                                                                 | p.Gln906*                                                                                                                    | 0 | FALSE | chr15:994<br>67847:C:T      | 121:chr15:<br>99467847:<br>C:T  | 0.001068 |
| 80_c6-1 | 80 | TSC2                      | MODERATE           | c.1922G>A                                                                                                                                                 | p.Ser641Asn                                                                                                                  | 0 | FALSE | chr16:212<br>1593:G:A       | 121:chr16:<br>2121593:G<br>:A   | 0.001088 |
| 80_c6-1 | 80 | CTNNB1                    | MODERATE           | c.1972G>T                                                                                                                                                 | p.Val658Phe                                                                                                                  | 0 | FALSE | chr3:4127<br>8096:G:T       | 121:chr3:4<br>1278096:G<br>:T   | 0.003238 |

|         |    |                           |                    |                                                                                                    |                                                                                     |     |       |                        |                                |          |
|---------|----|---------------------------|--------------------|----------------------------------------------------------------------------------------------------|-------------------------------------------------------------------------------------|-----|-------|------------------------|--------------------------------|----------|
| 80_c6-1 | 80 | CDKN2A                    | MODIFIER; MODERATE | c.194-3537T>G;<br>c.83T>G                                                                          | ; p.Val28Gly                                                                        | 1   | FALSE | chr9:2197<br>4744:A:C  | 121:chr9:2<br>1974744:A<br>:C  | 0.03958  |
| 80_c6-1 | 80 | CDKN2A                    | MODIFIER; MODERATE | c.194-3568A>C;<br>c.52A>C                                                                          | ; p.Thr18Pro                                                                        | 1   | FALSE | chr9:2197<br>4775:T:G  | 121:chr9:2<br>1974775:T<br>:G  | 0.019697 |
| 80_c6-1 | 80 | SMO                       | MODERATE           | c.1045A>C                                                                                          | p.Thr349Pro                                                                         | 0   | FALSE | chr7:1288<br>46115:A:C | 121:chr7:1<br>28846115:<br>A:C | 0.025146 |
| 80_c6-1 | 80 | PIK3CA                    | MODERATE           | c.1849C>T                                                                                          | p.Arg617Trp                                                                         | 1   | FALSE | chr3:1789<br>37461:C:T | 121:chr3:1<br>78937461:<br>C:T | 0.001138 |
| 80_c6-1 | 80 | MITF                      | MODIFIER; MODERATE | c.93+115G<br>>A;<br>c.208G>A;<br>c.373G>A;<br>c.481G>A;<br>c.526G>A;<br>c.529G>A                   | ; p.Ala70Thr;<br>p.Ala125Thr<br>;<br>p.Ala161Thr<br>;<br>p.Ala176Thr<br>p.Ala177Thr | 0   | FALSE | chr3:6998<br>7147:G:A  | 121:chr3:6<br>9987147:G<br>:A  | 0.001724 |
| 80_c6-1 | 80 | ROS1                      | MODERATE           | c.5687T>G                                                                                          | p.Val1896Gly                                                                        | 1   | FALSE | chr6:1176<br>42512:A:C | 121:chr6:1<br>17642512:<br>A:C | 0.001912 |
| 80_c6-1 | 80 | MIR1225;<br>PKD1;<br>TSC2 | MODIFIER; MODERATE | n.*90C>T;<br>c.*13118C<br>>T;<br>c.*13121C<br>>T;<br>c.5033G>A<br>;<br>c.5165G>A<br>;<br>c.5234G>A | ; p.Arg1678His;<br>p.Arg1722His;<br>p.Arg1745His                                    | 0   | FALSE | chr16:213<br>8301:G:A  | 121:chr16:<br>2138301:G<br>:A  | 0.001397 |
| 80_c6-1 | 80 | IGF1R                     | MODERATE           | c.3905T>C;<br>c.3908T>C                                                                            | p.Val1302Ala;<br>p.Val1303Ala                                                       | 0   | FALSE | chr15:995<br>00475:T:C | 121:chr15:<br>99500475:<br>T:C | 0.008065 |
| 80_c6-1 | 80 | PDGFRA                    | MODERATE           | c.3080C>A                                                                                          | p.Pro1027His                                                                        | 1   | FALSE | chr4:5515<br>6679:C:A  | 121:chr4:5<br>5156679:C<br>:A  | 0.001029 |
| 80_c6-1 | 80 | TP53                      | MODERATE           | c.257G>A;<br>c.338G>A;<br>c.617G>A;<br>c.734G>A                                                    | p.Gly86Asp;<br>p.Gly113Asp<br>;<br>p.Gly206Asp<br>;<br>p.Gly245Asp                  | 126 | FALSE | chr17:757<br>7547:C:T  | 121:chr17:<br>7577547:C<br>:T  | 0.00119  |
| 80_c6-1 | 80 | DDR2                      | MODERATE           | c.1418G>A                                                                                          | p.Arg473His                                                                         | 2   | FALSE | chr1:1627<br>40216:G:A | 121:chr1:1<br>62740216:<br>G:A | 0.000997 |
| 80_c6-1 | 80 | IGF1R                     | MODERATE           | c.3121C>T;<br>c.3124C>T                                                                            | p.Arg1041Cys;<br>p.Arg1042Cys                                                       | 0   | FALSE | chr15:994<br>78220:C:T | 121:chr15:<br>99478220:<br>C:T | 0.001093 |



|          |     |        |                            |                                                      |                                                                         |    |       |                             |                                 |          |
|----------|-----|--------|----------------------------|------------------------------------------------------|-------------------------------------------------------------------------|----|-------|-----------------------------|---------------------------------|----------|
| 80_c6-1  | 80  | NTRK1  | MODERATE                   | c.1940T>G<br>;<br>c.2030T>G<br>;<br>c.2048T>G        | p.Val647Gly;<br>p.Val677Gly;<br>p.Val683Gly                             | 2  | FALSE | chr1:1568<br>49792:T:G      | 121:chr1:1<br>56849792:<br>T:G  | 0.014563 |
| 80_c6-1  | 80  | NTRK3  | MODERATE                   | c.2137C>T;<br>c.2161C>T;<br>c.2203C>T                | p.Arg713Cys<br>;<br>p.Arg721Cys<br>;<br>p.Arg735Cys                     | 0  | FALSE | chr15:884<br>23632:G:A      | 121:chr15:<br>88423632:<br>G:A  | 0.001823 |
| 131_bl-1 | 131 | ATM    | MODERATE                   | c.7325A>G                                            | p.Gln2442Ar<br>g                                                        | 0  | FALSE | chr11:108<br>200958:A:<br>G | 122:chr11:<br>10820095<br>8:A:G | 0.00081  |
| 131_bl-1 | 131 | MAP2K1 | MODERATE                   | c.316G>A                                             | p.Ala106Thr                                                             | 1  | FALSE | chr15:667<br>29108:G:A      | 122:chr15:<br>66729108:<br>G:A  | 0.001598 |
| 131_bl-1 | 131 | PIK3R1 | MODERATE                   | c.1694G>A<br>;<br>c.605G>A;<br>c.794G>A;<br>c.884G>A | p.Ser565Asn<br>;<br>p.Ser202Asn<br>;<br>p.Ser265Asn<br>;<br>p.Ser295Asn | 1  | FALSE | chr5:6759<br>1101:G:A       | 122:chr5:6<br>7591101:G<br>:A   | 0.00076  |
| 131_bl-1 | 131 | ATM    | MODERATE                   | c.8774G>A                                            | p.Gly2925As<br>p                                                        | 0  | FALSE | chr11:108<br>224595:G:<br>A | 122:chr11:<br>10822459<br>5:G:A | 0.000907 |
| 131_bl-1 | 131 | TP53   | LOW; MODIFIER;<br>MODERATE | c.-6C>T;<br>c.355C>T;<br>c.472C>T;<br>c.76C>T        | p.Arg119Cys<br>;<br>p.Arg158Cys<br>;<br>p.Arg26Cys                      | 17 | FALSE | chr17:757<br>8458:G:A       | 122:chr17:<br>7578458:G<br>:A   | 0.00087  |
| 131_bl-1 | 131 | GNA11  | MODERATE                   | c.1030G>A                                            | p.Val344Me<br>t                                                         | 1  | FALSE | chr19:312<br>1127:G:A       | 122:chr19:<br>3121127:G<br>:A   | 0.000887 |
| 131_bl-1 | 131 | KDR    | MODERATE                   | c.2497C>T                                            | p.Arg833Trp                                                             | 1  | FALSE | chr4:5596<br>4316:G:A       | 122:chr4:5<br>5964316:G<br>:A   | 0.000815 |
| 131_bl-1 | 131 | EGFR   | MODERATE                   | c.445C>T                                             | p.Arg149Trp                                                             | 1  | FALSE | chr7:5521<br>4319:C:T       | 122:chr7:5<br>5214319:C<br>:T   | 0.000951 |
| 131_bl-1 | 131 | NOTCH1 | MODERATE                   | c.3635G>A                                            | p.Gly1212As<br>p                                                        | 0  | FALSE | chr9:1394<br>01765:C:T      | 122:chr9:1<br>39401765:<br>C:T  | 0.000939 |

|          |     |        |                    |                                                                                                             |                                                                                             |    |       |                    |                        |          |
|----------|-----|--------|--------------------|-------------------------------------------------------------------------------------------------------------|---------------------------------------------------------------------------------------------|----|-------|--------------------|------------------------|----------|
| 131_bl-1 | 131 | FGFR2  | MODIFIER; MODERATE | c.939+4687C>T;<br>c.1112C>T;<br>c.1115C>T;<br>c.767C>T;<br>c.776C>T;<br>c.845C>T;<br>c.848C>T;<br>n.1562C>T | p.Ala371Val;<br>p.Ala372Val;<br>p.Ala256Val;<br>p.Ala259Val;<br>p.Ala282Val;<br>p.Ala283Val | 1  | FALSE | chr10:123274806:GA | 122:chr10:123274806:GA | 0.000735 |
| 131_bl-1 | 131 | IGF1R  | MODERATE           | c.3430G>A;<br>c.3433G>A                                                                                     | p.Glu1144Lys;<br>p.Glu1145Lys                                                               | 0  | FALSE | chr15:99482565:GA  | 122:chr15:99482565:GA  | 0.000938 |
| 131_bl-1 | 131 | IGF1R  | MODERATE           | c.280G>A                                                                                                    | p.Glu94Lys                                                                                  | 0  | FALSE | chr15:99250976:GA  | 122:chr15:99250976:GA  | 0.000762 |
| 131_bl-1 | 131 | CDKN2A | MODIFIER; MODERATE | c.194-3568A>C;<br>c.52A>C                                                                                   | p.Thr18Pro                                                                                  | 1  | FALSE | chr9:21974775:TG   | 122:chr9:21974775:G    | 0.039433 |
| 131_bl-1 | 131 | PTEN   | MODERATE           | c.724G>A                                                                                                    | p.Glu242Lys                                                                                 | 2  | FALSE | chr10:89717699:GA  | 122:chr10:89717699:GA  | 0.000879 |
| 131_bl-1 | 131 | MET    | MODERATE           | c.3815T>C;<br>c.3869T>C                                                                                     | p.Leu1272Pro;<br>p.Leu1290Pro                                                               | 2  | FALSE | chr7:116435725:TC  | 122:chr7:116435725:TC  | 0.002208 |
| 131_bl-1 | 131 | FGFR3  | MODERATE           | c.905G>A                                                                                                    | p.Gly302Asp                                                                                 | 1  | FALSE | chr4:1803727:GA    | 122:chr4:1803727:GA    | 0.000912 |
| 131_bl-1 | 131 | NOTCH1 | MODERATE           | c.5885G>A                                                                                                   | p.Arg1962His                                                                                | 0  | FALSE | chr9:139395053:CT  | 122:chr9:139395053:CT  | 0.000973 |
| 131_bl-1 | 131 | CDH1   | HIGH               | c.1921C>T                                                                                                   | p.Gln641*                                                                                   | 0  | FALSE | chr16:68856113:CT  | 122:chr16:68856113:CT  | 0.00075  |
| 131_bl-1 | 131 | TP53   | MODERATE           | c.130T>C;<br>c.409T>C;<br>c.49T>C;<br>c.526T>C                                                              | p.Cys44Arg;<br>p.Cys137Arg;<br>p.Cys17Arg;<br>p.Cys176Arg                                   | 15 | FALSE | chr17:7578404:AG   | 122:chr17:7578404:AG   | 0.000854 |
| 131_bl-1 | 131 | EGFR   | MODERATE           | c.627A>C                                                                                                    | p.Lys209Asn                                                                                 | 1  | FALSE | chr7:55219054:AC   | 122:chr7:55219054:AC   | 0.002288 |
| 131_bl-1 | 131 | AKT1   | MODERATE           | c.361C>T                                                                                                    | p.Arg121Trp                                                                                 | 2  | FALSE | chr14:105242063:GA | 122:chr14:105242063:GA | 0.001119 |
| 131_bl-1 | 131 | IGF1R  | MODERATE           | c.3121C>T;<br>c.3124C>T                                                                                     | p.Arg1041Cys;<br>p.Arg1042Cys                                                               | 0  | FALSE | chr15:99478220:CT  | 122:chr15:99478220:CT  | 0.001124 |

|          |     |                             |                            |                                                                                               |                                                                         |    |       |                    |                        |          |
|----------|-----|-----------------------------|----------------------------|-----------------------------------------------------------------------------------------------|-------------------------------------------------------------------------|----|-------|--------------------|------------------------|----------|
| 131_bl-1 | 131 | NF1                         | MODERATE                   | c.2695T>G                                                                                     | p.Leu899Val                                                             | 3  | FALSE | chr17:29556328:T:G | 122:chr17:29556328:T:G | 0.015926 |
| 131_bl-1 | 131 | TP53                        | MODERATE; MODIFIER         | c.140C>T;<br>c.257C>T;<br>c.-279C>T;<br>c.-360C>T                                             | p.Ala47Val;<br>p.Ala86Val;                                              | 1  | FALSE | chr17:7579430:G:A  | 122:chr17:7579430:G:A  | 0.001099 |
| 131_bl-1 | 131 | TP53                        | MODIFIER; MODERATE         | c.*145T>C;<br>c.*233T>C;<br>c.1009T>C;<br>c.1126T>C;<br>c.649T>C;<br>c.730T>C                 | p.Ser337Pro<br>;<br>p.Ser376Pro<br>;<br>p.Ser217Pro<br>;<br>p.Ser244Pro | 2  | FALSE | chr17:7572983:A:G  | 122:chr17:7572983:A:G  | 0.004345 |
| 131_bl-1 | 131 | NOTCH1                      | MODERATE                   | c.4906G>A                                                                                     | p.Glu1636Lys                                                            | 0  | FALSE | chr9:139399237:C:T | 122:chr9:139399237:C:T | 0.000898 |
| 131_bl-1 | 131 | TP53                        | MODIFIER; LOW              | c.-100C>T;<br>c.-19C>T;<br>c.261C>T;<br>c.378C>T                                              | p.Tyr87Tyr;<br>p.Tyr126Tyr                                              | 5  | FALSE | chr17:7578552:G:A  | 122:chr17:7578552:G:A  | 0.000801 |
| 131_bl-1 | 131 | ERBB2;<br>MIEN1;<br>MIR4728 | MODERATE; MODIFIER         | c.2434G>A<br>;<br>c.2479G>A<br>;<br>c.2524G>A<br>;<br>n.2848G>A<br>;<br>c.*388C>T;<br>n.-1G>A | p.Val812Ile;<br>p.Val827Ile;<br>p.Val842Ile;                            | 17 | FALSE | chr17:37881332:G:A | 122:chr17:37881332:G:A | 0.00127  |
| 131_bl-1 | 131 | RET                         | MODERATE                   | c.1690A>C                                                                                     | p.Thr564Pro                                                             | 1  | FALSE | chr10:43608342:A:C | 122:chr10:43608342:A:C | 0.057449 |
| 131_bl-1 | 131 | KIT                         | MODERATE                   | c.1897C>T;<br>c.1909C>T                                                                       | p.Leu633Phe;<br>p.Leu637Phe                                             | 1  | FALSE | chr4:55594206:C:T  | 122:chr4:55594206:C:T  | 0.000861 |
| 131_bl-1 | 131 | C9orf53;<br>CDKN2A          | MODIFIER; MODERATE;<br>LOW | n.*616T>G<br>;<br>c.*120A>C<br>;<br>c.197A>C;<br>c.240A>C                                     | p.His66Pro;<br>p.Pro80Pro                                               | 1  | FALSE | chr9:21971161:T:G  | 122:chr9:21971161:T:G  | 0.065766 |
| 131_bl-1 | 131 | CDKN2A                      | MODIFIER; MODERATE         | c.194-3537T>G;<br>c.83T>G                                                                     | p.Val28Gly                                                              | 1  | FALSE | chr9:21974744:A:C  | 122:chr9:21974744:A:C  | 0.070432 |
| 131_bl-1 | 131 | PDGFRA                      | MODERATE                   | c.827C>T                                                                                      | p.Thr276Met                                                             | 1  | FALSE | chr4:55133523:C:T  | 122:chr4:55133523:C:T  | 0.001289 |

|          |     |                             |                    |                                                                                               |                                                                                                            |   |       |                        |                                |          |
|----------|-----|-----------------------------|--------------------|-----------------------------------------------------------------------------------------------|------------------------------------------------------------------------------------------------------------|---|-------|------------------------|--------------------------------|----------|
| 131_bl-1 | 131 | TSC2                        | MODERATE           | c.629C>T                                                                                      | p.Ala210Val                                                                                                | 0 | FALSE | chr16:210<br>6226:C:T  | 122:chr16:<br>2106226:C<br>:T  | 0.001016 |
| 131_bl-1 | 131 | EGFR                        | MODERATE           | c.664C>T                                                                                      | p.Arg222Cys                                                                                                | 8 | FALSE | chr7:5522<br>0274:C:T  | 122:chr7:5<br>5220274:C<br>:T  | 0.001461 |
| 131_bl-1 | 131 | FGFR4                       | MODERATE           | c.901T>C                                                                                      | p.Tyr301His                                                                                                | 1 | FALSE | chr5:1765<br>19495:T:C | 122:chr5:1<br>76519495:<br>T:C | 0.000834 |
| 131_bl-1 | 131 | FGFR1                       | MODERATE           | c.292C>T;<br>c.298C>T;<br>c.541C>T;<br>c.559C>T;<br>c.565C>T;<br>c.658C>T                     | p.Arg98Cys;<br>p.Arg100Cys<br>;<br>p.Arg181Cys<br>;<br>p.Arg187Cys<br>;<br>p.Arg189Cys<br>;<br>p.Arg220Cys | 1 | FALSE | chr8:3828<br>5495:G:A  | 122:chr8:3<br>8285495:G<br>:A  | 0.000861 |
| 131_bl-1 | 131 | PTEN                        | MODERATE           | c.923G>A                                                                                      | p.Arg308His                                                                                                | 1 | FALSE | chr10:897<br>20772:G:A | 122:chr10:<br>89720772:<br>G:A | 0.001381 |
| 131_bl-1 | 131 | ERBB2;<br>MIEN1;<br>MIR4728 | MODERATE; MODIFIER | c.2261G>A<br>;<br>c.2306G>A<br>;<br>c.2351G>A<br>;<br>n.2675G>A<br>;<br>c.*388C>T;<br>n.-1G>A | p.Arg754His<br>;<br>p.Arg769His<br>;<br>p.Arg784His<br>;                                                   | 1 | FALSE | chr17:378<br>81022:G:A | 122:chr17:<br>37881022:<br>G:A | 0.000753 |
| 131_bl-1 | 131 | EGFR                        | MODIFIER; MODERATE | c.*1464C><br>T;<br>c.1279C>T                                                                  | p.Arg427Cys                                                                                                | 2 | FALSE | chr7:5522<br>5427:C:T  | 122:chr7:5<br>5225427:C<br>:T  | 0.000795 |
| 131_bl-1 | 131 | CDKN2A;<br>CDKN2B-<br>AS1   | MODERATE; MODIFIER | c.22A>G;<br>n.-1T>C                                                                           | p.Thr8Ala;                                                                                                 | 1 | FALSE | chr9:2199<br>4309:T:C  | 122:chr9:2<br>1994309:T<br>:C  | 0.003704 |
| 131_bl-1 | 131 | ERBB2                       | MODERATE; MODIFIER | c.379C>T;<br>c.424C>T;<br>c.469C>T;<br>n.793C>T                                               | p.Arg127Trp<br>;<br>p.Arg142Trp<br>;<br>p.Arg157Trp<br>;                                                   | 1 | FALSE | chr17:378<br>65600:C:T | 122:chr17:<br>37865600:<br>C:T | 0.000748 |
| 131_bl-1 | 131 | ALK                         | MODERATE           | c.2825C>T                                                                                     | p.Ala942Val                                                                                                | 1 | FALSE | chr2:2945<br>0529:G:A  | 122:chr2:2<br>9450529:G<br>:A  | 0.000985 |

|          |     |                    |                    |                                                                                                             |                                                                                             |   |       |                        |                                |          |
|----------|-----|--------------------|--------------------|-------------------------------------------------------------------------------------------------------------|---------------------------------------------------------------------------------------------|---|-------|------------------------|--------------------------------|----------|
| 131_bl-1 | 131 | GNAS               | MODIFIER; MODERATE | c.*927C>T;<br>c.*972C>T;<br>c.1021C>T;<br>c.1024C>T;<br>c.1066C>T;<br>c.1069C>T;<br>c.2995C>T;<br>n.1156C>T | p.Arg341Cys<br>;<br>p.Arg342Cys<br>;<br>p.Arg356Cys<br>;<br>p.Arg357Cys<br>;<br>p.Arg999Cys | 0 | FALSE | chr20:574<br>85765:C:T | 122:chr20:<br>57485765:<br>C:T | 0.000926 |
| 131_bl-1 | 131 | APC                | MODERATE           | c.721C>T;<br>c.775C>T                                                                                       | p.Arg241Trp<br>;<br>p.Arg259Trp                                                             | 0 | FALSE | chr5:1121<br>37021:C:T | 122:chr5:1<br>12137021:<br>C:T | 0.00115  |
| 131_bl-1 | 131 | TSC1               | MODERATE           | c.1823C>T;<br>c.1973C>T;<br>c.1976C>T                                                                       | p.Ala608Val;<br>p.Ala658Val;<br>p.Ala659Val                                                 | 0 | FALSE | chr9:1357<br>80989:G:A | 122:chr9:1<br>35780989:<br>G:A | 0.000934 |
| 131_bl-1 | 131 | C9orf53;<br>CDKN2A | MODIFIER; MODERATE | n.*616C>T<br>;<br>c.*17G>A;<br>c.*296G>A<br>; c.373G>A                                                      | p.Asp125As<br>n                                                                             | 2 | FALSE | chr9:2197<br>0985:C:T  | 122:chr9:2<br>1970985:C<br>:T  | 0.000946 |
| 131_bl-1 | 131 | IGF1R              | MODERATE           | c.2824G>A<br>;<br>c.2827G>A                                                                                 | p.Ala942Thr<br>;<br>p.Ala943Thr                                                             | 0 | FALSE | chr15:994<br>72831:G:A | 122:chr15:<br>99472831:<br>G:A | 0.000781 |
| 131_bl-1 | 131 | FGFR1              | MODERATE           | c.359C>T;<br>c.365C>T;<br>c.608C>T;<br>c.626C>T;<br>c.632C>T;<br>c.725C>T                                   | p.Ala120Val;<br>p.Ala122Val;<br>p.Ala203Val;<br>p.Ala209Val;<br>p.Ala211Val;<br>p.Ala242Val | 1 | FALSE | chr8:3828<br>3753:G:A  | 122:chr8:3<br>8283753:G<br>:A  | 0.001371 |
| 131_bl-1 | 131 | KDR                | MODERATE           | c.2323G>T                                                                                                   | p.Ala775Ser                                                                                 | 1 | FALSE | chr4:5596<br>4914:C:A  | 122:chr4:5<br>5964914:C<br>:A  | 0.002091 |
| 131_bl-1 | 131 | SMO                | MODERATE           | c.1045A>C                                                                                                   | p.Thr349Pro                                                                                 | 0 | FALSE | chr7:1288<br>46115:A:C | 122:chr7:1<br>28846115:<br>A:C | 0.033017 |

|          |     |                 |                    |                                                                                 |                                                                                             |    |       |                             |                                 |          |
|----------|-----|-----------------|--------------------|---------------------------------------------------------------------------------|---------------------------------------------------------------------------------------------|----|-------|-----------------------------|---------------------------------|----------|
| 131_bl-1 | 131 | FGFR1           | MODERATE           | c.1211C>T;<br>c.1217C>T;<br>c.1454C>T;<br>c.1478C>T;<br>c.1484C>T;<br>c.1577C>T | p.Ala404Val;<br>p.Ala406Val;<br>p.Ala485Val;<br>p.Ala493Val;<br>p.Ala495Val;<br>p.Ala526Val | 1  | FALSE | chr8:3827<br>5456:G:A       | 122:chr8:3<br>8275456:G<br>:A   | 0.000774 |
| 131_bl-1 | 131 | CWH43           | MODERATE           | c.1972G>A<br>;<br>c.2053G>A                                                     | p.Glu658Lys<br>;<br>p.Glu685Lys                                                             | 0  | FALSE | chr4:4906<br>3860:G:A       | 122:chr4:4<br>9063860:G<br>:A   | 0.000922 |
| 131_bl-1 | 131 | INSRR;<br>NTRK1 | MODIFIER; MODERATE | c.3397+13<br>C>T;<br>c.28G>A                                                    | ; p.Ala10Thr                                                                                | 1  | FALSE | chr1:1568<br>11891:G:A      | 122:chr1:1<br>56811891:<br>G:A  | 0.001041 |
| 131_bl-1 | 131 | APC             | MODERATE           | c.1708G>A<br>;<br>c.1762G>A                                                     | p.Val570Ile;<br>p.Val588Ile                                                                 | 0  | FALSE | chr5:1121<br>70666:G:A      | 122:chr5:1<br>12170666:<br>G:A  | 0.000835 |
| 131_bl-1 | 131 | TP53            | MODERATE           | c.151T>C;<br>c.430T>C;<br>c.547T>C;<br>c.70T>C                                  | p.Ser51Pro;<br>p.Ser144Pro<br>;<br>p.Ser183Pro<br>; p.Ser24Pro                              | 9  | FALSE | chr17:757<br>8383:A:G       | 122:chr17:<br>7578383:A<br>:G   | 0.001525 |
| 131_bl-1 | 131 | ESR1            | MODERATE           | c.719G>A;<br>c.725G>A                                                           | p.Cys240Tyr<br>;<br>p.Cys242Tyr                                                             | 0  | FALSE | chr6:1522<br>01865:G:A      | 122:chr6:1<br>52201865:<br>G:A  | 8.00E-04 |
| 131_bl-1 | 131 | STK11           | MODERATE           | c.644G>A                                                                        | p.Gly215Asp                                                                                 | 1  | FALSE | chr19:122<br>0626:G:A       | 122:chr19:<br>1220626:G<br>:A   | 0.001127 |
| 131_bl-1 | 131 | NTRK1           | MODERATE           | c.1940T>G<br>;<br>c.2030T>G<br>;<br>c.2048T>G                                   | p.Val647Gly;<br>p.Val677Gly;<br>p.Val683Gly                                                 | 2  | FALSE | chr1:1568<br>49792:T:G      | 122:chr1:1<br>56849792:<br>T:G  | 0.030303 |
| 131_bl-1 | 131 | MET             | MODERATE           | c.3509G>A<br>;<br>c.3563G>A                                                     | p.Arg1170Gln;<br>p.Arg1188Gln                                                               | 1  | FALSE | chr7:1164<br>18998:G:A      | 122:chr7:1<br>16418998:<br>G:A  | 0.000786 |
| 131_bl-1 | 131 | ATM             | MODERATE           | c.1431G>T                                                                       | p.Lys477Asn                                                                                 | 0  | FALSE | chr11:108<br>121623:G:<br>T | 122:chr11:<br>10812162<br>3:G:T | 0.000849 |
| 131_bl-1 | 131 | TP53            | MODIFIER; MODERATE | c.*116C>T;<br>c.*28C>T;<br>c.1009C>T;<br>c.532C>T;<br>c.613C>T;<br>c.892C>T     | ; p.Arg337Cys<br>;<br>p.Arg178Cys<br>;<br>p.Arg205Cys<br>;<br>p.Arg298Cys                   | 31 | FALSE | chr17:757<br>4018:G:A       | 122:chr17:<br>7574018:G<br>:A   | 0.000769 |

|          |     |                             |                    |                                                                                                                      |                                                                |   |       |                    |                        |          |
|----------|-----|-----------------------------|--------------------|----------------------------------------------------------------------------------------------------------------------|----------------------------------------------------------------|---|-------|--------------------|------------------------|----------|
| 131_bl-1 | 131 | NTRK3                       | MODERATE           | c.506G>A                                                                                                             | p.Arg169His                                                    | 0 | FALSE | chr15:88680751:C:T | 122:chr15:88680751:C:T | 0.000789 |
| 131_bl-1 | 131 | TP53                        | MODERATE           | c.116A>G;<br>c.35A>G;<br>c.395A>G;<br>c.512A>G                                                                       | p.Glu39Gly;<br>p.Glu12Gly;<br>p.Glu132Gly;<br>;<br>p.Glu171Gly | 3 | FALSE | chr17:7578418:T:C  | 122:chr17:7578418:T:C  | 0.004244 |
| 131_bl-1 | 131 | ERBB2;<br>MIEN1;<br>MIR4728 | MODIFIER; MODERATE | c.3160-213A>G;<br>c.3251A>G;<br>;<br>c.3296A>G;<br>;<br>c.3341A>G;<br>;<br>n.3665A>G;<br>;<br>c.*388T>C;<br>n.*67A>G | p.Glu1084Gly;<br>p.Glu1099Gly;<br>p.Glu1114Gly                 | 1 | FALSE | chr17:37883729:A:G | 122:chr17:37883729:A:G | 0.002084 |
| 131_bl-1 | 131 | EGFR                        | MODERATE           | c.907G>A                                                                                                             | p.Asp303Asn                                                    | 1 | FALSE | chr7:55223540:G:A  | 122:chr7:55223540:G:A  | 0.001317 |
| 131_bl-1 | 131 | PTEN                        | MODERATE           | c.455T>C                                                                                                             | p.Leu152Pro                                                    | 2 | FALSE | chr10:89692971:T:C | 122:chr10:89692971:T:C | 0.00092  |
| 131_bl-1 | 131 | NTRK2                       | MODERATE           | c.2195C>T;<br>c.2243C>T                                                                                              | p.Thr732Met;<br>p.Thr748Met                                    | 0 | FALSE | chr9:87635191:C:T  | 122:chr9:87635191:C:T  | 0.000916 |
| 131_bl-1 | 131 | VHL                         | MODIFIER; MODERATE | c.341-3190G>A;<br>c.424G>A                                                                                           | p.Val142Ile                                                    | 0 | FALSE | chr3:10188281:G:A  | 122:chr3:10188281:G:A  | 0.000905 |
| 131_bl-1 | 131 | PHLPP1                      | MODERATE           | c.2452G>A                                                                                                            | p.Val818Ile                                                    | 0 | FALSE | chr18:60570204:G:A | 122:chr18:60570204:G:A | 0.001133 |
| 131_bl-1 | 131 | GNA11                       | MODERATE           | c.997G>A                                                                                                             | p.Asp333Asn                                                    | 1 | FALSE | chr19:3121094:G:A  | 122:chr19:3121094:G:A  | 0.00128  |
| 131_bl-1 | 131 | MIR4673;<br>NOTCH1          | MODIFIER; MODERATE | n.*59A>C;<br>c.1195A>C                                                                                               | p.Thr399Pro                                                    | 0 | FALSE | chr9:139412649:T:G | 122:chr9:139412649:T:G | 0.012682 |
| 131_bl-1 | 131 | PIK3CA                      | MODERATE           | c.3101A>G                                                                                                            | p.Glu1034Gly                                                   | 2 | FALSE | chr3:178952046:A:G | 122:chr3:178952046:A:G | 0.000738 |
| 131_bl-1 | 131 | FBXW7                       | MODERATE           | c.1274G>A;<br>c.1388G>A;<br>;<br>c.1628G>A                                                                           | p.Arg425Lys;<br>p.Arg463Lys;<br>;<br>p.Arg543Lys               | 0 | FALSE | chr4:153247174:C:T | 122:chr4:153247174:C:T | 0.001181 |
| 131_bl-1 | 131 | GNA11                       | MODERATE           | c.1052T>C                                                                                                            | p.Leu351Pro                                                    | 1 | FALSE | chr19:3121149:T:C  | 122:chr19:3121149:T:C  | 0.003831 |

|          |     |                    |                    |                                                                                          |                                                                         |   |       |                        |                                |          |
|----------|-----|--------------------|--------------------|------------------------------------------------------------------------------------------|-------------------------------------------------------------------------|---|-------|------------------------|--------------------------------|----------|
| 131_bl-1 | 131 | BRAF               | MODERATE           | c.2285C>T                                                                                | p.Ala762Val                                                             | 2 | FALSE | chr7:1404<br>34413:G:A | 122:chr7:1<br>40434413:<br>G:A | 0.001201 |
| 131_bl-1 | 131 | TP53               | MODIFIER; MODERATE | c.*109G>A<br>;<br>c.*197G>A<br>;<br>c.1090G>A<br>;<br>c.613G>A;<br>c.694G>A;<br>c.973G>A | p.Ala364Thr<br>;<br>p.Ala205Thr<br>;<br>p.Ala232Thr<br>;<br>p.Ala325Thr | 1 | FALSE | chr17:757<br>3937:C:T  | 122:chr17:<br>7573937:C<br>:T  | 0.001121 |
| 131_bl-1 | 131 | PTEN               | MODERATE           | c.295G>A                                                                                 | p.Glu99Lys                                                              | 3 | FALSE | chr10:896<br>92811:G:A | 122:chr10:<br>89692811:<br>G:A | 0.000885 |
| 131_bl-1 | 131 | IDH2;<br>ZNF710    | MODERATE; MODIFIER | c.1091C>T;<br>c.1247C>T;<br>c.857C>T;<br>c.*2147G><br>A                                  | p.Ala364Val;<br>p.Ala416Val;<br>p.Ala286Val;                            | 1 | FALSE | chr15:906<br>28072:G:A | 122:chr15:<br>90628072:<br>G:A | 0.000824 |
| 131_bl-1 | 131 | FGFR3              | MODIFIER; MODERATE | c.931-<br>374G>A;<br>c.1196G>A<br>;<br>c.1202G>A                                         | p.Arg399His<br>;<br>p.Arg401His                                         | 1 | FALSE | chr4:1806<br>177:G:A   | 122:chr4:1<br>806177:G:<br>A   | 0.001406 |
| 131_bl-1 | 131 | PIK3R1             | MODERATE           | c.1226G>A<br>;<br>c.137G>A;<br>c.326G>A;<br>c.416G>A                                     | p.Arg409Gln<br>;<br>p.Arg46Gln;<br>p.Arg109Gln<br>;<br>p.Arg139Gln      | 1 | FALSE | chr5:6758<br>9238:G:A  | 122:chr5:6<br>7589238:G<br>:A  | 0.000787 |
| 131_bl-1 | 131 | NTRK1              | MODERATE           | c.1039C>T;<br>c.949C>T                                                                   | p.Arg347Cys<br>;<br>p.Arg317Cys                                         | 1 | FALSE | chr1:1568<br>43613:C:T | 122:chr1:1<br>56843613:<br>C:T | 0.000787 |
| 131_bl-1 | 131 | C9orf53;<br>CDKN2A | MODIFIER; MODERATE | n.*616C>T<br>;<br>c.*330G>A<br>;<br>c.*51G>A;<br>c.407G>A                                | p.Gly136Asp                                                             | 2 | FALSE | chr9:2197<br>0951:C:T  | 122:chr9:2<br>1970951:C<br>:T  | 0.001013 |
| 131_bl-1 | 131 | MET                | MODERATE           | c.2980G>A<br>;<br>c.3034G>A                                                              | p.Glu994Lys<br>;<br>p.Glu1012Lys                                        | 1 | FALSE | chr7:1164<br>11995:G:A | 122:chr7:1<br>16411995:<br>G:A | 0.000805 |
| 131_bl-1 | 131 | DDR2               | MODERATE           | c.397C>T                                                                                 | p.Arg133Trp                                                             | 1 | FALSE | chr1:1627<br>24625:C:T | 122:chr1:1<br>62724625:<br>C:T | 0.00092  |
| 131_bl-1 | 131 | DDR2               | MODERATE           | c.1418G>A                                                                                | p.Arg473His                                                             | 2 | FALSE | chr1:1627<br>40216:G:A | 122:chr1:1<br>62740216:<br>G:A | 0.000763 |



|          |     |        |                |                                                        |                                                         |     |       |                             |                                 |          |
|----------|-----|--------|----------------|--------------------------------------------------------|---------------------------------------------------------|-----|-------|-----------------------------|---------------------------------|----------|
| 131_bl-1 | 131 | ROS1   | HIGH           | c.5728C>T                                              | p.Arg1910*                                              | 1   | FALSE | chr6:1176<br>42471:G:A      | 122:chr6:1<br>17642471:<br>G:A  | 0.000805 |
| 131_bl-1 | 131 | NTRK1  | MODERATE       | c.1150G>A<br>;<br>c.1240G>A<br>;<br>c.1258G>A          | p.Val384Me<br>t;<br>p.Val414Me<br>t;<br>p.Val420Me<br>t | 2   | FALSE | chr1:1568<br>44704:G:A      | 122:chr1:1<br>56844704:<br>G:A  | 0.000734 |
| 131_bl-1 | 131 | NOTCH1 | MODERATE       | c.5033T>C                                              | p.Leu1678Pr<br>o                                        | 0   | FALSE | chr9:1393<br>97768:A:G      | 122:chr9:1<br>39397768:<br>A:G  | 0.001086 |
| 131_bl-1 | 131 | STK11  | MODERATE       | c.628T>C                                               | p.Cys210Arg                                             | 1   | FALSE | chr19:122<br>0610:T:C       | 122:chr19:<br>1220610:T<br>:C   | 0.005982 |
| 131_bl-1 | 131 | HGF    | MODERATE       | c.1951G>A<br>;<br>c.1966G>A                            | p.Glu651Lys<br>;<br>p.Glu656Lys                         | 0   | FALSE | chr7:8133<br>4750:C:T       | 122:chr7:8<br>1334750:C<br>:T   | 0.000736 |
| 131_bl-1 | 131 | ATM    | MODERATE       | c.2075G>A                                              | p.Arg692His                                             | 0   | FALSE | chr11:108<br>124717:G:<br>A | 122:chr11:<br>10812471<br>7:G:A | 0.000797 |
| 131_bl-1 | 131 | CWH43  | MODERATE       | c.691C>T;<br>c.772C>T                                  | p.Arg231Cys<br>;<br>p.Arg258Cys                         | 0   | FALSE | chr4:4900<br>0535:C:T       | 122:chr4:4<br>9000535:C<br>:T   | 0.000791 |
| 131_bl-1 | 131 | IGF1R  | MODERATE       | c.3934T>C;<br>c.3937T>C                                | p.Ser1312Pr<br>o;<br>p.Ser1313Pr<br>o                   | 0   | FALSE | chr15:995<br>00504:T:C      | 122:chr15:<br>99500504:<br>T:C  | 0.036922 |
| 131_bl-1 | 131 | IGF1R  | MODERATE       | c.3905T>C;<br>c.3908T>C                                | p.Val1302Al<br>a;<br>p.Val1303Al<br>a                   | 0   | FALSE | chr15:995<br>00475:T:C      | 122:chr15:<br>99500475:<br>T:C  | 0.006211 |
| 131_bl-1 | 131 | ERBB2  | MODIFIER; HIGH | n.1375C>T<br>;<br>c.1006C>T;<br>c.1051C>T;<br>c.961C>T | p.Arg336*;<br>p.Arg351*;<br>p.Arg321*                   | 1   | FALSE | chr17:378<br>68604:C:T      | 122:chr17:<br>37868604:<br>C:T  | 0.000758 |
| 131_bl-1 | 131 | IDH1   | MODERATE       | c.394C>T                                               | p.Arg132Cys                                             | 626 | FALSE | chr2:2091<br>13113:G:A      | 122:chr2:2<br>09113113:<br>G:A  | 0.001279 |
| 131_bl-1 | 131 | KIT    | MODERATE       | c.2671G>A<br>;<br>c.2683G>A                            | p.Ala891Thr<br>;<br>p.Ala895Thr                         | 3   | FALSE | chr4:5560<br>2973:G:A       | 122:chr4:5<br>5602973:G<br>:A   | 0.000693 |
| 131_bl-1 | 131 | EPHA3  | MODERATE       | c.947A>C                                               | p.Asp316Ala                                             | 0   | FALSE | chr3:8939<br>0198:A:C       | 122:chr3:8<br>9390198:A<br>:C   | 0.000935 |

|          |     |                             |                    |                                                                                               |                                                          |   |       |                             |                                 |          |
|----------|-----|-----------------------------|--------------------|-----------------------------------------------------------------------------------------------|----------------------------------------------------------|---|-------|-----------------------------|---------------------------------|----------|
| 131_bl-1 | 131 | ERBB2;<br>MIEN1;<br>MIR4728 | MODERATE; MODIFIER | c.2600G>A<br>;<br>c.2645G>A<br>;<br>c.2690G>A<br>;<br>n.3014G>A<br>;<br>c.*388C>T;<br>n.-1G>A | p.Arg867Gln<br>;<br>p.Arg882Gln<br>;<br>p.Arg897Gln<br>; | 2 | FALSE | chr17:378<br>81620:G:A      | 122:chr17:<br>37881620:<br>G:A  | 0.001112 |
| 131_bl-1 | 131 | ATM                         | MODERATE           | c.5833G>A                                                                                     | p.Ala1945Th<br>r                                         | 0 | FALSE | chr11:108<br>180957:G:<br>A | 122:chr11:<br>10818095<br>7:G:A | 0.00079  |
| 131_bl-1 | 131 | ERBB2                       | MODERATE; MODIFIER | c.560G>A;<br>c.605G>A;<br>c.650G>A;<br>n.974G>A                                               | p.Arg187His<br>;<br>p.Arg202His<br>;<br>p.Arg217His<br>; | 1 | FALSE | chr17:378<br>66345:G:A      | 122:chr17:<br>37866345:<br>G:A  | 0.000798 |
| 131_bl-1 | 131 | NTRK3                       | MODERATE           | c.560T>C                                                                                      | p.Leu187Pro                                              | 0 | FALSE | chr15:886<br>80697:A:G      | 122:chr15:<br>88680697:<br>A:G  | 0.000807 |
| 131_bl-1 | 131 | TSC1                        | MODERATE           | c.457C>T;<br>c.610C>T                                                                         | p.Arg153Cys<br>;<br>p.Arg204Cys                          | 0 | FALSE | chr9:1357<br>97259:G:A      | 122:chr9:1<br>35797259:<br>G:A  | 0.000871 |
| 131_bl-1 | 131 | VHL                         | MODIFIER; MODERATE | c.341-<br>3270A>C;<br>c.344A>C                                                                | p.His115Pro                                              | 0 | FALSE | chr3:1018<br>8201:A:C       | 122:chr3:1<br>0188201:A<br>:C   | 0.001401 |
| 131_bl-1 | 131 | C9orf53;<br>CDKN2A          | MODIFIER; MODERATE | n.*616C>G<br>;<br>c.*140G>C<br>;<br>c.217G>C;<br>c.260G>C                                     | p.Ala73Pro;<br>p.Arg87Pro                                | 1 | FALSE | chr9:2197<br>1141:C:G       | 122:chr9:2<br>1971141:C<br>:G   | 0.007299 |
| 131_bl-1 | 131 | NTRK3                       | MODERATE           | c.1139C>T                                                                                     | p.Ala380Val                                              | 0 | FALSE | chr15:886<br>78397:G:A      | 122:chr15:<br>88678397:<br>G:A  | 0.000824 |
| 74_c7-1  | 74  | MET                         | HIGH               | c.1639C>T                                                                                     | p.Arg547*                                                | 2 | FALSE | chr7:1163<br>81017:C:T      | 123:chr7:1<br>16381017:<br>C:T  | 0.001086 |
| 74_c7-1  | 74  | FBXW7                       | MODERATE           | c.289G>A;<br>c.403G>A;<br>c.643G>A                                                            | p.Ala97Thr;<br>p.Ala135Thr<br>;<br>p.Ala215Thr           | 0 | FALSE | chr4:1532<br>68165:C:T      | 123:chr4:1<br>53268165:<br>C:T  | 0.001147 |
| 74_c7-1  | 74  | HRAS;<br>LRRCS6             | MODERATE; MODIFIER | c.248C>T;<br>c.-506G>A                                                                        | p.Ala83Val;                                              | 1 | FALSE | chr11:533<br>808:G:A        | 123:chr11:<br>533808:G:<br>A    | 0.002333 |
| 74_c7-1  | 74  | ATM                         | MODERATE           | c.7330G>A                                                                                     | p.Glu2444Ly<br>s                                         | 0 | FALSE | chr11:108<br>200963:G:<br>A | 123:chr11:<br>10820096<br>3:G:A | 0.001364 |

|         |    |        |                    |                                                                   |                                                           |   |       |                     |                         |          |
|---------|----|--------|--------------------|-------------------------------------------------------------------|-----------------------------------------------------------|---|-------|---------------------|-------------------------|----------|
| 74_c7-1 | 74 | KIT    | MODERATE           | c.1486G>A                                                         | p.Asp496Asn                                               | 1 | FALSE | chr4:55592162:G:A   | 123:chr4:55592162:G:A   | 0.001547 |
| 74_c7-1 | 74 | PDGFRA | MODERATE           | c.1711G>A                                                         | p.Glu571Lys                                               | 1 | FALSE | chr4:55141065:G:A   | 123:chr4:55141065:G:A   | 0.002333 |
| 74_c7-1 | 74 | AR     | MODERATE           | c.2360G>A;<br>; c.764G>A                                          | p.Arg787Gln;<br>; p.Arg255Gln                             | 0 | FALSE | chrX:66941716:G:A   | 123:chrX:66941716:G:A   | 0.001414 |
| 74_c7-1 | 74 | NTRK3  | MODERATE           | c.995C>T                                                          | p.Thr332Met                                               | 0 | FALSE | chr15:88678541:G:A  | 123:chr15:88678541:G:A  | 0.00134  |
| 74_c7-1 | 74 | FBXW7  | MODERATE           | c.182G>A;<br>c.296G>A;<br>c.536G>A                                | p.Arg61His;<br>; p.Arg99His;<br>; p.Arg179His             | 0 | FALSE | chr4:153271242:C:T  | 123:chr4:153271242:C:T  | 0.002131 |
| 74_c7-1 | 74 | EPHA3  | MODERATE           | c.2530C>T                                                         | p.Pro844Ser                                               | 0 | FALSE | chr3:89499360:C:T   | 123:chr3:89499360:C:T   | 0.001444 |
| 74_c7-1 | 74 | ALK    | MODERATE           | c.2527G>A                                                         | p.Gly843Arg                                               | 1 | FALSE | chr2:29455275:C:T   | 123:chr2:29455275:C:T   | 0.001455 |
| 74_c7-1 | 74 | FGFR2  | MODIFIER; MODERATE | c.110-14009G>A;<br>c.110-889G>A;<br>n.757-14009G>A;<br>; c.346G>A | p.Glu116Lys                                               | 1 | FALSE | chr10:123324982:C:T | 123:chr10:123324982:C:T | 0.001282 |
| 74_c7-1 | 74 | PTEN   | MODERATE           | c.725A>G                                                          | p.Glu242Gly                                               | 1 | FALSE | chr10:89717700:A:G  | 123:chr10:89717700:A:G  | 0.001516 |
| 74_c7-1 | 74 | CTNNB1 | LOW                | c.1956G>A                                                         | p.Ala652Ala                                               | 0 | FALSE | chr3:41278080:G:A   | 123:chr3:41278080:G:A   | 0.00136  |
| 74_c7-1 | 74 | KIT    | MODERATE           | c.1835C>T;<br>c.1847C>T                                           | p.Ala612Val;<br>; p.Ala616Val                             | 1 | FALSE | chr4:55594061:C:T   | 123:chr4:55594061:C:T   | 0.001182 |
| 74_c7-1 | 74 | NTRK1  | MODERATE           | c.1967G>A;<br>;<br>c.2057G>A;<br>;<br>c.2075G>A                   | p.Arg656His;<br>;<br>; p.Arg686His;<br>;<br>; p.Arg692His | 1 | FALSE | chr1:156849819:G:A  | 123:chr1:156849819:G:A  | 0.003046 |
| 74_c7-1 | 74 | KIT    | LOW                | c.1869G>A;<br>;<br>c.1881G>A                                      | p.Pro623Pro;<br>;<br>; p.Pro627Pro                        | 1 | FALSE | chr4:55594178:G:A   | 123:chr4:55594178:G:A   | 0.001483 |
| 74_c7-1 | 74 | ALK    | MODERATE           | c.986C>T                                                          | p.Ser329Phe                                               | 1 | FALSE | chr2:29754949:G:A   | 123:chr2:29754949:G:A   | 0.00147  |
| 74_c7-1 | 74 | ATM    | MODERATE           | c.1009C>T                                                         | p.Arg337Cys                                               | 0 | FALSE | chr11:108117798:C:T | 123:chr11:108117798:C:T | 0.003995 |

|         |    |                                 |                    |                                                                                    |                                                |   |       |                    |                        |          |
|---------|----|---------------------------------|--------------------|------------------------------------------------------------------------------------|------------------------------------------------|---|-------|--------------------|------------------------|----------|
| 74_c7-1 | 74 | ALK                             | MODERATE           | c.3599C>T                                                                          | p.Ala1200Val                                   | 2 | FALSE | chr2:29443618:G:A  | 123:chr2:29443618:G:A  | 0.001623 |
| 74_c7-1 | 74 | APC                             | MODERATE           | c.1198G>A;<br>c.1252G>A                                                            | p.Glu400Lys;<br>p.Glu418Lys                    | 0 | FALSE | chr5:112154981:G:A | 123:chr5:112154981:G:A | 0.0013   |
| 74_c7-1 | 74 | STK11                           | MODERATE           | c.647C>T                                                                           | p.Ser216Phe                                    | 3 | FALSE | chr19:1220629:C:T  | 123:chr19:1220629:C:T  | 0.002635 |
| 74_c7-1 | 74 | MET                             | MODERATE           | c.1640G>A                                                                          | p.Arg547Gln                                    | 1 | FALSE | chr7:116381018:G:A | 123:chr7:116381018:G:A | 0.001076 |
| 74_c7-1 | 74 | EGFR                            | MODIFIER; MODERATE | c.*2364G>A;<br>c.2203G>A                                                           | p.Gly735Ser                                    | 4 | FALSE | chr7:55242433:G:A  | 123:chr7:55242433:G:A  | 0.001264 |
| 74_c7-1 | 74 | MIR1225;<br>PKD1;<br>TSC2       | MODIFIER; MODERATE | n.*90G>A;<br>c.*13118G>A;<br>c.*13121G>A;<br>c.5032C>T;<br>c.5164C>T;<br>c.5233C>T | p.Arg1678Cys;<br>p.Arg1722Cys;<br>p.Arg1745Cys | 0 | FALSE | chr16:2138300:C:T  | 123:chr16:2138300:C:T  | 0.00149  |
| 74_c7-1 | 74 | KDR                             | MODERATE           | c.1040G>A                                                                          | p.Arg347His                                    | 4 | FALSE | chr4:55976872:C:T  | 123:chr4:55976872:C:T  | 0.001057 |
| 74_c7-1 | 74 | TSC2                            | MODERATE           | c.1381G>A                                                                          | p.Val461Met                                    | 0 | FALSE | chr16:2112992:G:A  | 123:chr16:2112992:G:A  | 0.001918 |
| 74_c7-1 | 74 | FOXL2;<br>FOXL2NB;<br>LINC01391 | MODERATE; MODIFIER | c.205G>A;<br>c.-132C>T;<br>n.-1G>A                                                 | p.Glu69Lys;                                    | 0 | FALSE | chr3:138665360:C:T | 123:chr3:138665360:C:T | 0.001627 |
| 74_c7-1 | 74 | NOTCH1                          | MODERATE           | c.3635G>A                                                                          | p.Gly1212Asp                                   | 0 | FALSE | chr9:139401765:C:T | 123:chr9:139401765:C:T | 0.001675 |
| 74_c7-1 | 74 | C9orf53;<br>CDKN2A              | MODIFIER; MODERATE | n.*616G>A;<br>c.*218C>T;<br>c.295C>T;<br>c.338C>T                                  | p.Arg99Trp;<br>p.Pro113Leu                     | 2 | FALSE | chr9:21971063:G:A  | 123:chr9:21971063:G:A  | 0.002081 |

|         |    |                    |                    |                                                                                                                            |                                                                |    |       |                            |                                 |          |
|---------|----|--------------------|--------------------|----------------------------------------------------------------------------------------------------------------------------|----------------------------------------------------------------|----|-------|----------------------------|---------------------------------|----------|
| 74_c7-1 | 74 | CSDE1;<br>NRAS     | MODIFIER; MODERATE | c.*2430G><br>A;<br>c.*2523G><br>A;<br>c.*2817G><br>A;<br>c.*2910G><br>A;<br>c.*2964G><br>A;<br>c.*3057G><br>A;<br>c.145G>A | ; p.Glu49Lys                                                   | 1  | FALSE | chr1:1152<br>56566:C:T     | 123:chr1:1<br>15256566:<br>C:T  | 0.001779 |
| 74_c7-1 | 74 | HGF                | MODERATE           | c.2068C>T;<br>c.2083C>T                                                                                                    | p.Arg690Cys<br>;<br>p.Arg695Cys                                | 0  | FALSE | chr7:8133<br>2001:G:A      | 123:chr7:8<br>1332001:G<br>:A   | 0.001412 |
| 74_c7-1 | 74 | AR                 | HIGH               | c.2494C>T;<br>c.898C>T                                                                                                     | p.Arg832*;<br>p.Arg300*                                        | 0  | FALSE | chrX:6694<br>2713:C:T      | 123:chrX:6<br>6942713:C<br>:T   | 0.001994 |
| 74_c7-1 | 74 | TSC2               | MODERATE           | c.3530C>T;<br>c.3662C>T                                                                                                    | p.Ser1177Le<br>u;<br>p.Ser1221Le<br>u                          | 0  | FALSE | chr16:213<br>1647:C:T      | 123:chr16:<br>2131647:C<br>:T   | 0.00198  |
| 74_c7-1 | 74 | ATM                | MODERATE           | c.8275C>T                                                                                                                  | p.Pro2759Se<br>r                                               | 0  | FALSE | chr11:108<br>213955:C<br>T | 123:chr11:<br>10821395<br>5:C:T | 0.003309 |
| 74_c7-1 | 74 | PDGFRA             | MODERATE           | c.2692G>A                                                                                                                  | p.Gly898Ser                                                    | 1  | FALSE | chr4:5515<br>4983:G:A      | 123:chr4:5<br>5154983:G<br>:A   | 0.001286 |
| 74_c7-1 | 74 | ALK                | MODERATE           | c.1588G>A                                                                                                                  | p.Glu530Lys                                                    | 1  | FALSE | chr2:2954<br>1229:C:T      | 123:chr2:2<br>9541229:C<br>:T   | 0.001312 |
| 74_c7-1 | 74 | KIT                | MODERATE           | c.2338G>A<br>;<br>c.2350G>A                                                                                                | p.Ala780Thr<br>;<br>p.Ala784Thr                                | 1  | FALSE | chr4:5559<br>8153:G:A      | 123:chr4:5<br>5598153:G<br>:A   | 0.001209 |
| 74_c7-1 | 74 | GNA11              | MODERATE           | c.667G>A                                                                                                                   | p.Val223Me<br>t                                                | 1  | FALSE | chr19:311<br>8983:G:A      | 123:chr19:<br>3118983:G<br>:A   | 0.00165  |
| 74_c7-1 | 74 | GNA11              | MODERATE           | c.1030G>A                                                                                                                  | p.Val344Me<br>t                                                | 1  | FALSE | chr19:312<br>1127:G:A      | 123:chr19:<br>3121127:G<br>:A   | 0.001402 |
| 74_c7-1 | 74 | HOXD-AS2;<br>HOXD8 | MODIFIER; MODERATE | n.*692C>T<br>;<br>c.304G>A;<br>c.853G>A;<br>c.856G>A                                                                       | ; p.Glu102Lys<br>;<br>p.Glu285Lys<br>;<br>p.Glu286Lys          | 0  | FALSE | chr2:1769<br>96323:G:A     | 123:chr2:1<br>76996323:<br>G:A  | 0.00188  |
| 74_c7-1 | 74 | TP53               | MODERATE           | c.145C>T;<br>c.424C>T;<br>c.541C>T;<br>c.64C>T                                                                             | p.Arg49Cys;<br>p.Arg142Cys<br>;<br>p.Arg181Cys<br>; p.Arg22Cys | 21 | FALSE | chr17:757<br>8389:G:A      | 123:chr17:<br>7578389:G<br>:A   | 0.001312 |

|         |    |        |                    |                                                 |                                                            |    |       |                    |                        |          |
|---------|----|--------|--------------------|-------------------------------------------------|------------------------------------------------------------|----|-------|--------------------|------------------------|----------|
| 74_c7-1 | 74 | NOTCH1 | MODERATE           | c.4901C>T                                       | p.Ala1634Val                                               | 0  | FALSE | chr9:139399242:G:A | 123:chr9:139399242:G:A | 0.002901 |
| 74_c7-1 | 74 | FBXW7  | MODERATE           | c.1274G>A;<br>c.1388G>A;<br>c.1628G>A           | p.Arg425Lys;<br>p.Arg463Lys;<br>p.Arg543Lys                | 0  | FALSE | chr4:153247174:C:T | 123:chr4:153247174:C:T | 0.00142  |
| 74_c7-1 | 74 | BRAF   | MODERATE           | c.2173C>T                                       | p.His725Tyr                                                | 1  | FALSE | chr7:140434525:G:A | 123:chr7:140434525:G:A | 0.001609 |
| 74_c7-1 | 74 | NF1    | MODERATE           | c.2659G>A                                       | p.Ala887Thr                                                | 1  | FALSE | chr17:29556292:G:A | 123:chr17:29556292:G:A | 0.00123  |
| 74_c7-1 | 74 | IGF1R  | MODERATE           | c.322G>A                                        | p.Gly108Ser                                                | 0  | FALSE | chr15:99251018:G:A | 123:chr15:99251018:G:A | 0.001205 |
| 74_c7-1 | 74 | TP53   | MODERATE           | c.236G>A;<br>c.317G>A;<br>c.596G>A;<br>c.713G>A | p.Cys79Tyr;<br>p.Cys106Tyr;<br>p.Cys199Tyr;<br>p.Cys238Tyr | 74 | FALSE | chr17:7577568:C:T  | 123:chr17:7577568:C:T  | 0.001248 |
| 74_c7-1 | 74 | NOTCH1 | MODERATE           | c.4906G>A                                       | p.Glu1636Lys                                               | 0  | FALSE | chr9:139399237:C:T | 123:chr9:139399237:C:T | 0.001919 |
| 74_c7-1 | 74 | DDR2   | MODERATE           | c.1418G>A                                       | p.Arg473His                                                | 2  | FALSE | chr1:162740216:G:A | 123:chr1:162740216:G:A | 0.001314 |
| 74_c7-1 | 74 | NOTCH1 | MODERATE           | c.4252G>A                                       | p.Ala1418Thr                                               | 0  | FALSE | chr9:139400096:C:T | 123:chr9:139400096:C:T | 0.001845 |
| 74_c7-1 | 74 | CDH1   | MODERATE           | c.871G>A                                        | p.Asp291Asn                                                | 0  | FALSE | chr16:68845625:G:A | 123:chr16:68845625:G:A | 0.001553 |
| 74_c7-1 | 74 | TSC1   | MODERATE           | c.457C>T;<br>c.610C>T                           | p.Arg153Cys;<br>p.Arg204Cys                                | 0  | FALSE | chr9:135797259:G:A | 123:chr9:135797259:G:A | 0.001506 |
| 74_c7-1 | 74 | TSC2   | MODIFIER; MODERATE | c.2837+1108G>A;<br>c.2933G>A                    | p.Arg978His                                                | 0  | FALSE | chr16:2127694:G:A  | 123:chr16:2127694:G:A  | 0.002366 |
| 74_c7-1 | 74 | PTEN   | MODERATE           | c.766G>A                                        | p.Glu256Lys                                                | 2  | FALSE | chr10:89717741:G:A | 123:chr10:89717741:G:A | 0.001489 |
| 74_c7-1 | 74 | TP53   | MODERATE           | c.224A>G;<br>c.305A>G;<br>c.584A>G;<br>c.701A>G | p.Tyr75Cys;<br>p.Tyr102Cys;<br>p.Tyr195Cys;<br>p.Tyr234Cys | 94 | FALSE | chr17:7577580:T:C  | 123:chr17:7577580:T:C  | 0.001187 |
| 74_c7-1 | 74 | PTEN   | MODERATE           | c.476G>A                                        | p.Arg159Lys                                                | 11 | FALSE | chr10:89692992:G:A | 123:chr10:89692992:G:A | 0.001742 |

|         |    |                    |                    |                                                                                 |                                                                                             |   |       |                    |                        |          |
|---------|----|--------------------|--------------------|---------------------------------------------------------------------------------|---------------------------------------------------------------------------------------------|---|-------|--------------------|------------------------|----------|
| 74_c7-1 | 74 | NF1                | MODERATE           | c.5294C>T;<br>c.5357C>T                                                         | p.Ser1765Leu;<br>p.Ser1786Leu                                                               | 1 | FALSE | chr17:29654605:C:T | 123:chr17:29654605:C:T | 0.001325 |
| 74_c7-1 | 74 | PHLPP1             | MODERATE           | c.3298G>A                                                                       | p.Glu1100Lys                                                                                | 0 | FALSE | chr18:60612478:G:A | 123:chr18:60612478:G:A | 0.001291 |
| 74_c7-1 | 74 | RET                | MODERATE           | c.2116G>A                                                                       | p.Val706Met                                                                                 | 2 | FALSE | chr10:43610164:G:A | 123:chr10:43610164:G:A | 0.001159 |
| 74_c7-1 | 74 | HRAS;<br>LRRC56    | MODERATE; MODIFIER | c.404G>A;<br>c.-506C>T                                                          | p.Arg135Gln                                                                                 | 1 | FALSE | chr11:533499:C:T   | 123:chr11:533499:C:T   | 0.001488 |
| 74_c7-1 | 74 | KDR                | MODERATE           | c.3065G>A                                                                       | p.Arg1022Gln                                                                                | 1 | FALSE | chr4:55958788:C:T  | 123:chr4:55958788:C:T  | 0.00202  |
| 74_c7-1 | 74 | EGFR;<br>EGFR-AS1  | MODERATE; MODIFIER | c.2591C>T;<br>n.-1G>A                                                           | p.Ala864Val                                                                                 | 2 | FALSE | chr7:55259533:C:T  | 123:chr7:55259533:C:T  | 0.001509 |
| 74_c7-1 | 74 | TP53               | MODERATE; MODIFIER | c.100G>A;<br>c.217G>A;<br>c.-279G>A;<br>c.-360G>A                               | p.Val34Met;<br>p.Val73Met                                                                   | 5 | FALSE | chr17:7579470:C:T  | 123:chr17:7579470:C:T  | 0.001833 |
| 74_c7-1 | 74 | FLT3               | MODERATE           | c.2845G>A                                                                       | p.Asp949Asn                                                                                 | 0 | FALSE | chr13:28588603:C:T | 123:chr13:28588603:C:T | 0.00122  |
| 74_c7-1 | 74 | IDH2;<br>ZNF710    | MODERATE; MODIFIER | c.1091C>T;<br>c.1247C>T;<br>c.857C>T;<br>c.*2147G>A                             | p.Ala364Val;<br>p.Ala416Val;<br>p.Ala286Val                                                 | 1 | FALSE | chr15:90628072:G:A | 123:chr15:90628072:G:A | 0.001509 |
| 74_c7-1 | 74 | FGFR1              | MODERATE           | c.1211C>T;<br>c.1217C>T;<br>c.1454C>T;<br>c.1478C>T;<br>c.1484C>T;<br>c.1577C>T | p.Ala404Val;<br>p.Ala406Val;<br>p.Ala485Val;<br>p.Ala493Val;<br>p.Ala495Val;<br>p.Ala526Val | 1 | FALSE | chr8:38275456:G:A  | 123:chr8:38275456:G:A  | 0.001285 |
| 74_c7-1 | 74 | NF1                | MODERATE           | c.2614G>A                                                                       | p.Glu872Lys                                                                                 | 1 | FALSE | chr17:29556247:G:A | 123:chr17:29556247:G:A | 0.001238 |
| 74_c7-1 | 74 | TSC2               | MODERATE           | c.2513G>A                                                                       | p.Ser838Asn                                                                                 | 0 | FALSE | chr16:2124358:G:A  | 123:chr16:2124358:G:A  | 0.002137 |
| 74_c7-1 | 74 | MIR4673;<br>NOTCH1 | MODIFIER; MODERATE | n.*59G>A;<br>c.775G>A                                                           | p.Asp259Asn                                                                                 | 0 | FALSE | chr9:139413985:C:T | 123:chr9:139413985:C:T | 0.001837 |
| 74_c7-1 | 74 | KDR                | MODERATE           | c.2953G>A                                                                       | p.Asp985Asn                                                                                 | 1 | FALSE | chr4:55960987:C:T  | 123:chr4:55960987:C:T  | 0.001596 |

|          |     |                 |                    |                                                                                                                                                                                |                                                                                                                      |   |       |                             |                                 |          |
|----------|-----|-----------------|--------------------|--------------------------------------------------------------------------------------------------------------------------------------------------------------------------------|----------------------------------------------------------------------------------------------------------------------|---|-------|-----------------------------|---------------------------------|----------|
| 74_c7-1  | 74  | MET             | MODERATE           | c.467C>T                                                                                                                                                                       | p.Ser156Leu                                                                                                          | 1 | FALSE | chr7:1163<br>39605:C:T      | 123:chr7:1<br>16339605:<br>C:T  | 0.001021 |
| 74_c7-1  | 74  | ATM             | MODERATE           | c.7328G>A                                                                                                                                                                      | p.Arg2443Gln                                                                                                         | 0 | FALSE | chr11:108<br>200961:G:<br>A | 123:chr11:<br>10820096<br>1:G:A | 0.002714 |
| 74_c7-1  | 74  | PIK3CA          | MODERATE           | c.3101A>G                                                                                                                                                                      | p.Glu1034Gly                                                                                                         | 2 | FALSE | chr3:1789<br>52046:A:G      | 123:chr3:1<br>78952046:<br>A:G  | 0.001174 |
| 74_c7-1  | 74  | PIK3CA          | MODERATE           | c.3155C>A                                                                                                                                                                      | p.Thr1052Lys                                                                                                         | 9 | FALSE | chr3:1789<br>52100:C:A      | 123:chr3:1<br>78952100:<br>C:A  | 0.00117  |
| 74_c7-1  | 74  | FGFR1;<br>LETM2 | MODERATE; MODIFIER | c.1927C>T;<br>c.1933C>T;<br>c.2170C>T;<br>c.2194C>T;<br>c.2200C>T;<br>c.2293C>T;<br>c.*1406G><br>A;<br>c.*1423G><br>A;<br>c.*1553G><br>A;<br>c.*1567G><br>A;<br>c.*1638G><br>A | p.Arg643Trp<br>;<br>p.Arg645Trp<br>;<br>p.Arg724Trp<br>;<br>p.Arg732Trp<br>;<br>p.Arg734Trp<br>;<br>p.Arg765Trp<br>; | 1 | FALSE | chr8:3827<br>1528:G:A       | 123:chr8:3<br>8271528:G<br>:A   | 0.002092 |
| 74_c7-1  | 74  | ERBB2           | MODERATE; MODIFIER | c.379C>T;<br>c.424C>T;<br>c.469C>T;<br>n.793C>T                                                                                                                                | p.Arg127Trp<br>;<br>p.Arg142Trp<br>;<br>p.Arg157Trp<br>;                                                             | 1 | FALSE | chr17:378<br>65600:C:T      | 123:chr17:<br>37865600:<br>C:T  | 0.001472 |
| 74_c7-1  | 74  | NTRK1           | MODERATE           | c.804C>G;<br>c.894C>G                                                                                                                                                          | p.His268Gln<br>;<br>p.His298Gln                                                                                      | 1 | FALSE | chr1:1568<br>43468:C:G      | 123:chr1:1<br>56843468:<br>C:G  | 0.002538 |
| 130_bl-1 | 130 | KIT             | MODERATE           | c.2338G>A<br>;<br>c.2350G>A                                                                                                                                                    | p.Ala780Thr<br>;<br>p.Ala784Thr                                                                                      | 1 | FALSE | chr4:5559<br>8153:G:A       | 124:chr4:5<br>5598153:G<br>:A   | 0.00191  |
| 130_bl-1 | 130 | TP53            | MODERATE; MODIFIER | c.167C>T;<br>c.284C>T;<br>c.-279C>T;<br>c.-360C>T                                                                                                                              | p.Ser56Phe;<br>p.Ser95Phe;                                                                                           | 3 | FALSE | chr17:757<br>9403:G:A       | 124:chr17:<br>7579403:G<br>:A   | 0.00266  |



|          |     |                |                    |                                                                                 |                                                                                                                 |   |       |                        |                                |          |
|----------|-----|----------------|--------------------|---------------------------------------------------------------------------------|-----------------------------------------------------------------------------------------------------------------|---|-------|------------------------|--------------------------------|----------|
| 130_bl-1 | 130 | FGFR4          | MODERATE           | c.1274G>A<br>;<br>c.1358G>A<br>;<br>c.1478G>A                                   | p.Arg425Gln<br>;<br>p.Arg453Gln<br>;<br>p.Arg493Gln                                                             | 2 | FALSE | chr5:1765<br>20735:G:A | 124:chr5:1<br>76520735:<br>G:A | 0.001965 |
| 130_bl-1 | 130 | IGF1R          | MODERATE           | c.3905T>C;<br>c.3908T>C                                                         | p.Val1302Ala;<br>p.Val1303Ala                                                                                   | 0 | FALSE | chr15:995<br>00475:T:C | 124:chr15:<br>99500475:<br>T:C | 0.002232 |
| 130_bl-1 | 130 | KLLN;<br>PTEN  | MODIFIER; MODERATE | c.-951G>A;<br>c.8C>T                                                            | p.Ala3Val                                                                                                       | 2 | FALSE | chr10:896<br>24234:C:T | 124:chr10:<br>89624234:<br>C:T | 0.002099 |
| 130_bl-1 | 130 | RPL19          | MODERATE           | c.452G>A                                                                        | p.Arg151His                                                                                                     | 0 | FALSE | chr17:373<br>60425:G:A | 124:chr17:<br>37360425:<br>G:A | 0.00348  |
| 130_bl-1 | 130 | KDR            | MODERATE           | c.2497C>T                                                                       | p.Arg833Trp                                                                                                     | 1 | FALSE | chr4:5596<br>4316:G:A  | 124:chr4:5<br>5964316:G<br>:A  | 0.002128 |
| 130_bl-1 | 130 | APC            | MODERATE           | c.1771G>A<br>;<br>c.1825G>A                                                     | p.Val591Ile;<br>p.Val609Ile                                                                                     | 0 | FALSE | chr5:1121<br>70729:G:A | 124:chr5:1<br>12170729:<br>G:A | 0.002304 |
| 130_bl-1 | 130 | STK11          | MODERATE           | c.536C>T                                                                        | p.Pro179Leu                                                                                                     | 1 | FALSE | chr19:122<br>0443:C:T  | 124:chr19:<br>1220443:C<br>:T  | 0.003333 |
| 130_bl-1 | 130 | RET            | MODERATE           | c.1538C>T                                                                       | p.Ala513Val                                                                                                     | 1 | FALSE | chr10:436<br>07562:C:T | 124:chr10:<br>43607562:<br>C:T | 0.001951 |
| 130_bl-1 | 130 | FGFR1          | MODERATE           | c.1060C>T;<br>c.1066C>T;<br>c.1303C>T;<br>c.1327C>T;<br>c.1333C>T;<br>c.1426C>T | p.Arg354Trp<br>;<br>p.Arg356Trp<br>;<br>p.Arg435Trp<br>;<br>p.Arg443Trp<br>;<br>p.Arg445Trp<br>;<br>p.Arg476Trp | 2 | FALSE | chr8:3827<br>5843:G:A  | 124:chr8:3<br>8275843:G<br>:A  | 0.001652 |
| 130_bl-1 | 130 | ALK            | MODERATE           | c.886G>A                                                                        | p.Glu296Lys                                                                                                     | 1 | FALSE | chr2:2991<br>7782:C:T  | 124:chr2:2<br>9917782:C<br>:T  | 0.001712 |
| 130_bl-1 | 130 | NOTCH1         | MODERATE           | c.5819G>A                                                                       | p.Arg1940His                                                                                                    | 0 | FALSE | chr9:1393<br>95119:C:T | 124:chr9:1<br>39395119:<br>C:T | 0.00314  |
| 130_bl-1 | 130 | CDH1           | MODERATE           | c.856G>A                                                                        | p.Ala286Thr                                                                                                     | 0 | FALSE | chr16:688<br>45610:G:A | 124:chr16:<br>68845610:<br>G:A | 0.002242 |
| 130_bl-1 | 130 | NTHL1;<br>TSC2 | MODIFIER; MODERATE | c.-20C>T;<br>c.170G>A                                                           | p.Arg57His                                                                                                      | 0 | FALSE | chr16:210<br>0432:G:A  | 124:chr16:<br>2100432:G<br>:A  | 0.002257 |

|          |     |                    |                    |                                                                           |                                                                                             |   |       |                     |                         |          |
|----------|-----|--------------------|--------------------|---------------------------------------------------------------------------|---------------------------------------------------------------------------------------------|---|-------|---------------------|-------------------------|----------|
| 130_bl-1 | 130 | FGFR2              | MODIFIER; MODERATE | c.749-4847G>A;<br>c.407G>A;<br>c.485G>A;<br>c.752G>A;<br>n.1054G>A        | p.Arg136Gln;<br>;<br>p.Arg162Gln;<br>;<br>p.Arg251Gln                                       | 2 | FALSE | chr10:123279680:C:T | 124:chr10:123279680:C:T | 0.00222  |
| 130_bl-1 | 130 | MIR4673;<br>NOTCH1 | MODIFIER; MODERATE | n.*59G>A;<br>c.1024G>A                                                    | p.Ala342Thr                                                                                 | 0 | FALSE | chr9:139413118:C:T  | 124:chr9:139413118:C:T  | 0.003476 |
| 130_bl-1 | 130 | KIT                | MODERATE           | c.506G>A                                                                  | p.Gly169Asp                                                                                 | 1 | FALSE | chr4:55564618:G:A   | 124:chr4:55564618:G:A   | 0.001857 |
| 130_bl-1 | 130 | CDH1               | MODERATE           | c.760G>A                                                                  | p.Asp254Asn                                                                                 | 0 | FALSE | chr16:68844172:G:A  | 124:chr16:68844172:G:A  | 0.001953 |
| 130_bl-1 | 130 | PTEN               | MODERATE           | c.701G>A                                                                  | p.Arg234Gln                                                                                 | 1 | FALSE | chr10:89717676:G:A  | 124:chr10:89717676:G:A  | 0.001953 |
| 130_bl-1 | 130 | EGFR               | MODERATE           | c.755G>A                                                                  | p.Arg252His                                                                                 | 3 | FALSE | chr7:55221711:G:A   | 124:chr7:55221711:G:A   | 0.002045 |
| 130_bl-1 | 130 | IGF1R              | MODERATE           | c.3121C>T;<br>c.3124C>T                                                   | p.Arg1041Cys;<br>p.Arg1042Cys                                                               | 0 | FALSE | chr15:99478220:C:T  | 124:chr15:99478220:C:T  | 0.001826 |
| 130_bl-1 | 130 | TP53               | MODERATE; MODIFIER | c.254G>A;<br>c.371G>A;<br>c.-279G>A;<br>c.-360G>A                         | p.Cys85Tyr;<br>p.Cys124Tyr                                                                  | 3 | FALSE | chr17:7579316:C:T   | 124:chr17:7579316:C:T   | 0.002342 |
| 94_c6-1  | 94  | ESR1               | MODERATE           | c.1171G>A;<br>;<br>c.1174G>A;<br>;<br>c.1180G>A                           | p.Val391Ile;<br>p.Val392Ile;<br>p.Val394Ile                                                 | 0 | FALSE | chr6:152332868:G:A  | 126:chr6:152332868:G:A  | 0.001357 |
| 94_c6-1  | 94  | KDR                | MODERATE           | c.3110C>T                                                                 | p.Ser1037Leu                                                                                | 2 | FALSE | chr4:55956205:G:A   | 126:chr4:55956205:G:A   | 0.00158  |
| 94_c6-1  | 94  | FLT3               | MODERATE           | c.2669C>T                                                                 | p.Pro890Leu                                                                                 | 0 | FALSE | chr13:28589378:G:A  | 126:chr13:28589378:G:A  | 0.001597 |
| 94_c6-1  | 94  | FGFR1              | MODERATE           | c.359C>T;<br>c.365C>T;<br>c.608C>T;<br>c.626C>T;<br>c.632C>T;<br>c.725C>T | p.Ala120Val;<br>p.Ala122Val;<br>p.Ala203Val;<br>p.Ala209Val;<br>p.Ala211Val;<br>p.Ala242Val | 1 | FALSE | chr8:38283753:G:A   | 126:chr8:38283753:G:A   | 0.001594 |

|         |    |                    |                            |                                                           |                                                          |    |       |                        |                                |          |
|---------|----|--------------------|----------------------------|-----------------------------------------------------------|----------------------------------------------------------|----|-------|------------------------|--------------------------------|----------|
| 94_c6-1 | 94 | HRAS;<br>LRRCS6    | MODERATE; MODIFIER         | c.248C>T;<br>c.-506G>A                                    | p.Ala83Val;                                              | 1  | FALSE | chr11:533<br>808:G:A   | 126:chr11:<br>533808:G:<br>A   | 0.001563 |
| 94_c6-1 | 94 | NTRK1              | MODERATE                   | c.1025G>A<br>; c.935G>A                                   | p.Arg342Gln<br>;<br>p.Arg312Gln                          | 3  | FALSE | chr1:1568<br>43599:G:A | 126:chr1:1<br>56843599:<br>G:A | 0.001115 |
| 94_c6-1 | 94 | MAP2K1             | MODERATE                   | c.316G>A                                                  | p.Ala106Thr                                              | 1  | FALSE | chr15:667<br>29108:G:A | 126:chr15:<br>66729108:<br>G:A | 0.00201  |
| 94_c6-1 | 94 | EGFR               | MODIFIER; MODERATE         | c.*2133G><br>A;<br>c.*2364G><br>A;<br>c.1883G>A           | p.Cys628Tyr                                              | 2  | FALSE | chr7:5523<br>8870:G:A  | 126:chr7:5<br>5238870:G<br>:A  | 0.001708 |
| 94_c6-1 | 94 | C9orf53;<br>CDKN2A | MODIFIER; MODERATE;<br>LOW | n.*616C>T<br>;<br>c.*258G>A<br>;<br>c.335G>A;<br>c.378G>A | p.Arg112His<br>;<br>p.Pro126Pro                          | 1  | FALSE | chr9:2197<br>1023:C:T  | 126:chr9:2<br>1971023:C<br>:T  | 0.001618 |
| 94_c6-1 | 94 | TP53               | MODIFIER; HIGH             | c.-55C>A;<br>c.27C>A;<br>c.306C>A;<br>c.423C>A            | p.Cys9*;<br>p.Cys102*;<br>p.Cys141*                      | 13 | FALSE | chr17:757<br>8507:G:T  | 126:chr17:<br>7578507:G<br>:T  | 0.159091 |
| 94_c6-1 | 94 | GNA11              | MODERATE                   | c.547C>T                                                  | p.Arg183Cys                                              | 9  | FALSE | chr19:311<br>5012:C:T  | 126:chr19:<br>3115012:C<br>:T  | 0.001439 |
| 94_c6-1 | 94 | PDGFRA             | MODERATE                   | c.554G>A                                                  | p.Gly185Glu                                              | 1  | FALSE | chr4:5513<br>0020:G:A  | 126:chr4:5<br>5130020:G<br>:A  | 0.001311 |
| 94_c6-1 | 94 | NTRK3              | MODERATE                   | c.1744G>A<br>;<br>c.1768G>A                               | p.Glu582Lys<br>;<br>p.Glu590Lys                          | 0  | FALSE | chr15:884<br>76364:C:T | 126:chr15:<br>88476364:<br>C:T | 0.001622 |
| 94_c6-1 | 94 | FGFR3              | MODIFIER; MODERATE         | c.931-<br>374G>A;<br>c.1196G>A<br>;<br>c.1202G>A          | p.Arg399His<br>;<br>p.Arg401His                          | 1  | FALSE | chr4:1806<br>177:G:A   | 126:chr4:1<br>806177:G:<br>A   | 0.001072 |
| 94_c6-1 | 94 | PTEN               | HIGH                       | c.822G>A                                                  | p.Trp274*                                                | 3  | FALSE | chr10:897<br>20671:G:A | 126:chr10:<br>89720671:<br>G:A | 0.011547 |
| 94_c6-1 | 94 | VHL                | MODIFIER; MODERATE         | c.341-<br>3202C>T;<br>c.412C>T                            | p.Pro138Ser                                              | 0  | FALSE | chr3:1018<br>8269:C:T  | 126:chr3:1<br>0188269:C<br>:T  | 0.001761 |
| 94_c6-1 | 94 | ERBB2              | MODERATE; MODIFIER         | c.832G>A;<br>c.877G>A;<br>c.922G>A;<br>n.1246G>A          | p.Val278Me<br>t;<br>p.Val293Me<br>t;<br>p.Val308Me<br>t; | 1  | FALSE | chr17:378<br>68201:G:A | 126:chr17:<br>37868201:<br>G:A | 0.000771 |

|         |    |                             |                    |                                                                                                                      |                                                                         |   |       |                             |                                 |          |
|---------|----|-----------------------------|--------------------|----------------------------------------------------------------------------------------------------------------------|-------------------------------------------------------------------------|---|-------|-----------------------------|---------------------------------|----------|
| 94_c6-1 | 94 | HOXD-AS2;<br>HOXD8          | MODIFIER; MODERATE | n.*692C>T<br>; c.-123-<br>30G>A;<br>c.400G>A                                                                         | p.Ala134Thr                                                             | 0 | FALSE | chr2:1769<br>95494:G:A      | 126:chr2:1<br>76995494:<br>G:A  | 0.002817 |
| 94_c6-1 | 94 | NOTCH1                      | MODERATE           | c.5558T>C                                                                                                            | p.Leu1853Pro                                                            | 0 | FALSE | chr9:1393<br>96280:A:G      | 126:chr9:1<br>39396280:<br>A:G  | 0.001444 |
| 94_c6-1 | 94 | ATM                         | HIGH               | c.1262C>A                                                                                                            | p.Ser421*                                                               | 0 | FALSE | chr11:108<br>121454:C:<br>A | 126:chr11:<br>10812145<br>4:C:A | 0.001775 |
| 94_c6-1 | 94 | PIK3R1                      | MODERATE           | c.1003G>A<br>;<br>c.1093G>A<br>;<br>c.1903G>A<br>;<br>c.814G>A                                                       | p.Glu335Lys<br>;<br>p.Glu365Lys<br>;<br>p.Glu635Lys<br>;<br>p.Glu272Lys | 1 | FALSE | chr5:6759<br>2087:G:A       | 126:chr5:6<br>7592087:G<br>:A   | 0.001579 |
| 94_c6-1 | 94 | IGF1R                       | MODERATE           | c.3905T>C;<br>c.3908T>C                                                                                              | p.Val1302Ala;<br>p.Val1303Ala                                           | 0 | FALSE | chr15:995<br>00475:T:C      | 126:chr15:<br>99500475:<br>T:C  | 0.00134  |
| 94_c6-1 | 94 | ERBB2;<br>MIEN1;<br>MIR4728 | MODIFIER; MODERATE | c.3160-<br>213A>G;<br>c.3251A>G<br>;<br>c.3296A>G<br>;<br>c.3341A>G<br>;<br>n.3665A>G<br>;<br>c.*388T>C;<br>n.*67A>G | p.Glu1084Gly;<br>p.Glu1099Gly;<br>p.Glu1114Gly                          | 1 | FALSE | chr17:378<br>83729:A:G      | 126:chr17:<br>37883729:<br>A:G  | 0.001123 |
| 94_c6-1 | 94 | FGFR3                       | MODERATE           | c.1543G>A<br>;<br>c.1879G>A<br>;<br>c.1885G>A                                                                        | p.Glu515Lys<br>;<br>p.Glu627Lys<br>;<br>p.Glu629Lys                     | 1 | FALSE | chr4:1807<br>820:G:A        | 126:chr4:1<br>807820:G:<br>A    | 0.001102 |
| 94_c6-1 | 94 | NOTCH1                      | MODERATE           | c.4898G>T                                                                                                            | p.Arg1633Leu                                                            | 0 | FALSE | chr9:1393<br>99245:C:A      | 126:chr9:1<br>39399245:<br>C:A  | 0.001649 |
| 94_c6-1 | 94 | CTNNB1                      | MODERATE           | c.1544G>A                                                                                                            | p.Arg515Gln                                                             | 0 | FALSE | chr3:4127<br>5649:G:A       | 126:chr3:4<br>1275649:G<br>:A   | 0.001818 |
| 94_c6-1 | 94 | HGF                         | MODERATE           | c.775G>C;<br>c.790G>C                                                                                                | p.Asp259His<br>;<br>p.Asp264His                                         | 0 | FALSE | chr7:8137<br>2744:C:G       | 126:chr7:8<br>1372744:C<br>:G   | 0.001512 |
| 94_c6-1 | 94 | TSC2                        | MODERATE           | c.2702G>A                                                                                                            | p.Arg901His                                                             | 0 | FALSE | chr16:212<br>6131:G:A       | 126:chr16:<br>2126131:G<br>:A   | 0.001349 |
| 94_c6-1 | 94 | EGFR                        | MODERATE           | c.1774G>A                                                                                                            | p.Val592Ile                                                             | 1 | FALSE | chr7:5523<br>3024:G:A       | 126:chr7:5<br>5233024:G<br>:A   | 0.001717 |

|         |    |                    |                    |                                                                 |                                                               |    |       |                             |                                 |          |
|---------|----|--------------------|--------------------|-----------------------------------------------------------------|---------------------------------------------------------------|----|-------|-----------------------------|---------------------------------|----------|
| 94_c6-1 | 94 | RET                | MODERATE           | c.1538C>T                                                       | p.Ala513Val                                                   | 1  | FALSE | chr10:436<br>07562:C:T      | 126:chr10:<br>43607562:<br>C:T  | 0.001391 |
| 94_c6-1 | 94 | AR                 | MODERATE           | c.2324G>A<br>; c.728G>A                                         | p.Arg775His<br>;<br>p.Arg243His                               | 0  | FALSE | chrX:6694<br>1680:G:A       | 126:chrX:6<br>6941680:G<br>:A   | 0.001495 |
| 94_c6-1 | 94 | NTRK2              | MODERATE           | c.220G>A                                                        | p.Ala74Thr                                                    | 0  | FALSE | chr9:8731<br>7081:G:A       | 126:chr9:8<br>7317081:G<br>:A   | 0.001605 |
| 94_c6-1 | 94 | ATM                | MODERATE           | c.6179G>A                                                       | p.Arg2060His                                                  | 0  | FALSE | chr11:108<br>186821:G:<br>A | 126:chr11:<br>10818682<br>1:G:A | 0.001389 |
| 94_c6-1 | 94 | C9orf53;<br>CDKN2A | MODIFIER; LOW      | n.*616G>A<br>; c.*22C>T;<br>c.*301C>T;<br>c.378C>T              | p.Val126Val                                                   | 3  | FALSE | chr9:2197<br>0980:G:A       | 126:chr9:2<br>1970980:G<br>:A   | 0.001605 |
| 94_c6-1 | 94 | EPHA3              | MODERATE           | c.665C>T                                                        | p.Ser222Phe                                                   | 0  | FALSE | chr3:8925<br>9521:C:T       | 126:chr3:8<br>9259521:C<br>:T   | 0.001476 |
| 94_c6-1 | 94 | STK11              | MODERATE           | c.1100C>T                                                       | p.Thr367Met                                                   | 1  | FALSE | chr19:122<br>3163:C:T       | 126:chr19:<br>1223163:C<br>:T   | 0.001684 |
| 94_c6-1 | 94 | TP53               | MODERATE           | c.136T>G;<br>c.217T>G;<br>c.496T>G;<br>c.613T>G                 | p.Tyr46Asp;<br>p.Tyr73Asp;<br>p.Tyr166Asp<br>;<br>p.Tyr205Asp | 14 | FALSE | chr17:757<br>8236:A:C       | 126:chr17:<br>7578236:A<br>:C   | 0.001449 |
| 94_c6-1 | 94 | MAP2K1             | MODERATE           | c.145C>T                                                        | p.Arg49Cys                                                    | 1  | FALSE | chr15:667<br>27429:C:T      | 126:chr15:<br>66727429:<br>C:T  | 0.001387 |
| 94_c6-1 | 94 | FGFR4              | MODERATE           | c.1978G>A<br>;<br>c.2062G>A<br>;<br>c.2182G>A                   | p.Ala660Thr<br>;<br>p.Ala688Thr<br>;<br>p.Ala728Thr           | 1  | FALSE | chr5:1765<br>24321:G:A      | 126:chr5:1<br>76524321:<br>G:A  | 0.001833 |
| 94_c6-1 | 94 | TSC2               | MODERATE           | c.2513G>A                                                       | p.Ser838Asn                                                   | 0  | FALSE | chr16:212<br>4358:G:A       | 126:chr16:<br>2124358:G<br>:A   | 0.001368 |
| 94_c6-1 | 94 | FBXW7              | MODERATE           | c.232A>T;<br>c.346A>T;<br>c.586A>T                              | p.Thr78Ser;<br>p.Thr116Ser<br>;<br>p.Thr196Ser                | 0  | FALSE | chr4:1532<br>68222:T:A      | 126:chr4:1<br>53268222:<br>T:A  | 0.0039   |
| 94_c6-1 | 94 | IDH2;<br>ZNF710    | MODERATE; MODIFIER | c.1105G>A<br>;<br>c.1261G>A<br>;<br>c.871G>A;<br>c.*2147C><br>T | p.Gly369Ser<br>;<br>p.Gly421Ser<br>;<br>p.Gly291Ser           | 2  | FALSE | chr15:906<br>28058:C:T      | 126:chr15:<br>90628058:<br>C:T  | 0.001373 |

|          |     |                           |                    |                                                                                                    |                                                                         |     |       |                             |                                 |          |
|----------|-----|---------------------------|--------------------|----------------------------------------------------------------------------------------------------|-------------------------------------------------------------------------|-----|-------|-----------------------------|---------------------------------|----------|
| 94_c6-1  | 94  | ATM                       | MODERATE           | c.2930G>A                                                                                          | p.Cys977Tyr                                                             | 0   | FALSE | chr11:108<br>141986:G:<br>A | 126:chr11:<br>10814198<br>6:G:A | 0.001253 |
| 94_c6-1  | 94  | MET                       | MODERATE           | c.1336A>G                                                                                          | p.Ile446Val                                                             | 1   | FALSE | chr7:1163<br>71857:A:G      | 126:chr7:1<br>16371857:<br>A:G  | 0.001952 |
| 112_bl-1 | 112 | TSC1                      | MODERATE           | c.2677G>A<br>;<br>c.2827G>A<br>;<br>c.2830G>A                                                      | p.Ala893Thr<br>;<br>p.Ala943Thr<br>;<br>p.Ala944Thr                     | 0   | FALSE | chr9:1357<br>72716:C:T      | 127:chr9:1<br>35772716:<br>C:T  | 0.001137 |
| 112_bl-1 | 112 | EGFR                      | MODIFIER; MODERATE | c.*2364C><br>T;<br>c.2165C>T                                                                       | p.Ala722Val                                                             | 2   | FALSE | chr7:5524<br>1717:C:T       | 127:chr7:5<br>5241717:C<br>:T   | 0.001197 |
| 112_bl-1 | 112 | NTHL1;<br>TSC2            | MODIFIER; MODERATE | c.-20C>T;<br>c.170G>A                                                                              | p.Arg57His                                                              | 0   | FALSE | chr16:210<br>0432:G:A       | 127:chr16:<br>2100432:G<br>:A   | 0.001229 |
| 112_bl-1 | 112 | MIR1225;<br>PKD1;<br>TSC2 | MODIFIER; MODERATE | n.*90C>T;<br>c.*13118C<br>>T;<br>c.*13121C<br>>T;<br>c.5033G>A<br>;<br>c.5165G>A<br>;<br>c.5234G>A | p.Arg1678Hi<br>s;<br>p.Arg1722Hi<br>s;<br>p.Arg1745Hi<br>s              | 0   | FALSE | chr16:213<br>8301:G:A       | 127:chr16:<br>2138301:G<br>:A   | 0.00135  |
| 112_bl-1 | 112 | FBXW7                     | MODERATE           | c.232A>T;<br>c.346A>T;<br>c.586A>T                                                                 | p.Thr78Ser;<br>p.Thr116Ser<br>;<br>p.Thr196Ser                          | 0   | FALSE | chr4:1532<br>68222:T:A      | 127:chr4:1<br>53268222:<br>T:A  | 0.003108 |
| 112_bl-1 | 112 | FGFR4                     | MODERATE           | c.175C>T                                                                                           | p.Arg59Trp                                                              | 2   | FALSE | chr5:1765<br>17474:C:T      | 127:chr5:1<br>76517474:<br>C:T  | 0.00133  |
| 112_bl-1 | 112 | TP53                      | MODERATE           | c.460A>G;<br>c.541A>G;<br>c.820A>G;<br>c.937A>G                                                    | p.Ser154Gly<br>;<br>p.Ser181Gly<br>;<br>p.Ser274Gly<br>;<br>p.Ser313Gly | 2   | FALSE | chr17:757<br>6909:T:C       | 127:chr17:<br>7576909:T<br>:C   | 0.001294 |
| 112_bl-1 | 112 | NF1                       | MODIFIER; MODERATE | c.*2165G><br>A;<br>c.1976G>A                                                                       | p.Arg659Gln                                                             | 1   | FALSE | chr17:295<br>52243:G:A      | 127:chr17:<br>29552243:<br>G:A  | 0.00125  |
| 112_bl-1 | 112 | TP53                      | MODERATE           | c.257G>A;<br>c.338G>A;<br>c.617G>A;<br>c.734G>A                                                    | p.Gly86Asp;<br>p.Gly113Asp<br>;<br>p.Gly206Asp<br>;<br>p.Gly245Asp      | 126 | FALSE | chr17:757<br>7547:C:T       | 127:chr17:<br>7577547:C<br>:T   | 0.001084 |

|          |     |                 |                    |                                                                           |                                                                                                                 |    |       |                             |                                 |          |
|----------|-----|-----------------|--------------------|---------------------------------------------------------------------------|-----------------------------------------------------------------------------------------------------------------|----|-------|-----------------------------|---------------------------------|----------|
| 112_bl-1 | 112 | KIT             | MODERATE           | c.2671G>A<br>;<br>c.2683G>A                                               | p.Ala891Thr<br>;<br>p.Ala895Thr                                                                                 | 3  | FALSE | chr4:5560<br>2973:G:A       | 127:chr4:5<br>5602973:G<br>:A   | 0.001003 |
| 112_bl-1 | 112 | TSC2            | MODERATE           | c.1654G>A                                                                 | p.Ala552Thr                                                                                                     | 0  | FALSE | chr16:211<br>5574:G:A       | 127:chr16:<br>2115574:G<br>:A   | 0.001867 |
| 112_bl-1 | 112 | NTRK1           | MODERATE           | c.1751G>A<br>;<br>c.1841G>A<br>;<br>c.1859G>A                             | p.Gly584Asp<br>;<br>p.Gly614Asp<br>;<br>p.Gly620Asp                                                             | 1  | FALSE | chr1:1568<br>48967:G:A      | 127:chr1:1<br>56848967:<br>G:A  | 0.001725 |
| 112_bl-1 | 112 | HRAS;<br>LRRCS6 | MODERATE; MODIFIER | c.248C>T;<br>c.-506G>A                                                    | p.Ala83Val;                                                                                                     | 1  | FALSE | chr11:533<br>808:G:A        | 127:chr11:<br>533808:G:<br>A    | 0.001314 |
| 112_bl-1 | 112 | IDH2            | MODERATE           | c.128A>C;<br>c.362A>C;<br>c.518A>C                                        | p.His43Pro;<br>p.His121Pro<br>;<br>p.His173Pro                                                                  | 1  | FALSE | chr15:906<br>31835:T:G      | 127:chr15:<br>90631835:<br>T:G  | 0.001181 |
| 112_bl-1 | 112 | HRAS;<br>LRRCS6 | MODERATE; MODIFIER | c.196G>A;<br>c.-506C>T                                                    | p.Ala66Thr;                                                                                                     | 1  | FALSE | chr11:533<br>860:C:T        | 127:chr11:<br>533860:C:<br>T    | 0.001233 |
| 112_bl-1 | 112 | AKT1            | MODERATE           | c.932G>A                                                                  | p.Gly311Asp                                                                                                     | 1  | FALSE | chr14:105<br>239613:C:<br>T | 127:chr14:<br>10523961<br>3:C:T | 0.00144  |
| 112_bl-1 | 112 | IDH2            | MODERATE           | c.124A>G;<br>c.358A>G;<br>c.514A>G                                        | p.Arg42Gly;<br>p.Arg120Gly<br>;<br>p.Arg172Gly                                                                  | 19 | FALSE | chr15:906<br>31839:T:C      | 127:chr15:<br>90631839:<br>T:C  | 0.001158 |
| 112_bl-1 | 112 | TSC2            | MODERATE           | c.2035G>A                                                                 | p.Val679Me<br>t                                                                                                 | 0  | FALSE | chr16:212<br>1873:G:A       | 127:chr16:<br>2121873:G<br>:A   | 0.001461 |
| 112_bl-1 | 112 | ATM             | MODERATE           | c.7342G>A                                                                 | p.Asp2448A<br>sn                                                                                                | 0  | FALSE | chr11:108<br>200975:G:<br>A | 127:chr11:<br>10820097<br>5:G:A | 0.001678 |
| 112_bl-1 | 112 | FGFR1           | MODERATE           | c.475C>T;<br>c.481C>T;<br>c.724C>T;<br>c.742C>T;<br>c.748C>T;<br>c.841C>T | p.Arg159Trp<br>;<br>p.Arg161Trp<br>;<br>p.Arg242Trp<br>;<br>p.Arg248Trp<br>;<br>p.Arg250Trp<br>;<br>p.Arg281Trp | 2  | FALSE | chr8:3828<br>2215:G:A       | 127:chr8:3<br>8282215:G<br>:A   | 0.001119 |
| 112_bl-1 | 112 | APC             | MODERATE           | c.1820A>G<br>;<br>c.1874A>G                                               | p.Gln607Arg<br>;<br>p.Gln625Arg                                                                                 | 0  | FALSE | chr5:1121<br>70778:A:G      | 127:chr5:1<br>12170778:<br>A:G  | 0.001145 |
| 112_bl-1 | 112 | CDKN2A          | MODIFIER; HIGH     | c.194-<br>3575G>A;<br>c.45G>A                                             | ; p.Trp15*                                                                                                      | 3  | FALSE | chr9:2197<br>4782:C:T       | 127:chr9:2<br>1974782:C<br>:T   | 0.00207  |

|          |     |                             |                            |                                                                                                  |                                                           |       |       |                     |                         |          |
|----------|-----|-----------------------------|----------------------------|--------------------------------------------------------------------------------------------------|-----------------------------------------------------------|-------|-------|---------------------|-------------------------|----------|
| 112_bl-1 | 112 | ATM                         | MODERATE                   | c.4682T>C                                                                                        | p.Leu1561Pro                                              | 0     | FALSE | chr11:108164110:T:C | 127:chr11:108164110:T:C | 0.00114  |
| 112_bl-1 | 112 | BRAF                        | MODERATE                   | c.1799T>A                                                                                        | p.Val600Glu                                               | 23024 | FALSE | chr7:140453136:A:T  | 127:chr7:140453136:A:T  | 0.047331 |
| 112_bl-1 | 112 | FGFR3                       | MODERATE                   | c.1177G>A;<br>c.1513G>A;<br>c.1519G>A                                                            | p.Val393Ile;<br>p.Val505Ile;<br>p.Val507Ile               | 1     | FALSE | chr4:1807182:G:A    | 127:chr4:1807182:G:A    | 0.002017 |
| 112_bl-1 | 112 | NF1                         | MODERATE                   | c.467G>A                                                                                         | p.Arg156His                                               | 1     | FALSE | chr17:29490382:G:A  | 127:chr17:29490382:G:A  | 0.001814 |
| 112_bl-1 | 112 | IDH2;<br>ZNF710             | MODERATE; MODIFIER         | c.1105G>A;<br>c.1261G>A;<br>c.871G>A;<br>c.*2147C>T                                              | p.Gly369Ser;<br>p.Gly421Ser;<br>p.Gly291Ser               | 2     | FALSE | chr15:90628058:C:T  | 127:chr15:90628058:C:T  | 0.001124 |
| 112_bl-1 | 112 | ERBB2;<br>MIEN1;<br>MIR4728 | MODIFIER; MODERATE         | c.3160-213A>G;<br>c.3251A>G;<br>c.3296A>G;<br>c.3341A>G;<br>n.3665A>G;<br>c.*388T>C;<br>n.*67A>G | p.Glu1084Gly;<br>p.Glu1099Gly;<br>p.Glu1114Gly            | 1     | FALSE | chr17:37883729:A:G  | 127:chr17:37883729:A:G  | 0.001801 |
| 112_bl-1 | 112 | TP53                        | MODERATE                   | c.127C>T;<br>c.208C>T;<br>c.487C>T;<br>c.604C>T                                                  | p.Arg43Cys;<br>p.Arg70Cys;<br>p.Arg163Cys;<br>p.Arg202Cys | 6     | FALSE | chr17:7578245:G:A   | 127:chr17:7578245:G:A   | 0.001146 |
| 112_bl-1 | 112 | C9orf53;<br>CDKN2A          | MODIFIER; MODERATE;<br>LOW | n.*616G>A;<br>c.*228C>T;<br>c.305C>T;<br>c.348C>T                                                | p.Ala102Val;<br>p.Gly116Gly                               | 5     | FALSE | chr9:21971053:G:A   | 127:chr9:21971053:G:A   | 0.002232 |
| 112_bl-1 | 112 | AKT1                        | MODERATE                   | c.1099C>T                                                                                        | p.Arg367Cys                                               | 1     | FALSE | chr14:105239288:G:A | 127:chr14:105239288:G:A | 0.001283 |



|          |     |        |                    |                                                                                 |                                                                                                                 |   |       |                             |                                 |          |
|----------|-----|--------|--------------------|---------------------------------------------------------------------------------|-----------------------------------------------------------------------------------------------------------------|---|-------|-----------------------------|---------------------------------|----------|
| 112_bl-1 | 112 | TP53   | MODERATE; MODIFIER | c.125C>T;<br>c.242C>T;<br>c.-279C>T;<br>c.-360C>T                               | p.Thr42Ile;<br>p.Thr81Ile;                                                                                      | 2 | FALSE | chr17:757<br>9445:G:A       | 127:chr17:<br>7579445:G<br>:A   | 0.001394 |
| 112_bl-1 | 112 | TP53   | MODERATE           | c.149G>A;<br>c.428G>A;<br>c.545G>A;<br>c.68G>A                                  | p.Cys50Tyr;<br>p.Cys143Tyr<br>;<br>p.Cys182Tyr<br>; p.Cys23Tyr                                                  | 2 | FALSE | chr17:757<br>8385:C:T       | 127:chr17:<br>7578385:C<br>:T   | 0.001063 |
| 112_bl-1 | 112 | TP53   | MODIFIER; MODERATE | c.-15C>T;<br>c.-96C>T;<br>c.265C>T;<br>c.382C>T                                 | ;<br>p.Pro89Ser;<br>p.Pro128Ser                                                                                 | 7 | FALSE | chr17:757<br>8548:G:A       | 127:chr17:<br>7578548:G<br>:A   | 0.001667 |
| 112_bl-1 | 112 | PTEN   | HIGH               | c.822G>A                                                                        | p.Trp274*                                                                                                       | 3 | FALSE | chr10:897<br>20671:G:A      | 127:chr10:<br>89720671:<br>G:A  | 0.008375 |
| 112_bl-1 | 112 | NF1    | MODIFIER; MODERATE | c.*2165C><br>T;<br>c.1954C>T                                                    | ;<br>p.Arg652Cys                                                                                                | 1 | FALSE | chr17:295<br>52221:C:T      | 127:chr17:<br>29552221:<br>C:T  | 0.001675 |
| 112_bl-1 | 112 | EPHA3  | MODERATE           | c.1535G>A                                                                       | p.Arg512Gln                                                                                                     | 0 | FALSE | chr3:8944<br>8571:G:A       | 127:chr3:8<br>9448571:G<br>:A   | 0.001235 |
| 112_bl-1 | 112 | BRAF   | MODERATE           | c.2173C>T                                                                       | p.His725Tyr                                                                                                     | 1 | FALSE | chr7:1404<br>34525:G:A      | 127:chr7:1<br>40434525:<br>G:A  | 0.003451 |
| 112_bl-1 | 112 | FGFR1  | MODERATE           | c.1060C>T;<br>c.1066C>T;<br>c.1303C>T;<br>c.1327C>T;<br>c.1333C>T;<br>c.1426C>T | p.Arg354Trp<br>;<br>p.Arg356Trp<br>;<br>p.Arg435Trp<br>;<br>p.Arg443Trp<br>;<br>p.Arg445Trp<br>;<br>p.Arg476Trp | 2 | FALSE | chr8:3827<br>5843:G:A       | 127:chr8:3<br>8275843:G<br>:A   | 0.001468 |
| 112_bl-1 | 112 | CDKN2A | MODIFIER; MODERATE | c.194-<br>3519C>T;<br>c.101C>T                                                  | ;<br>p.Ala34Val                                                                                                 | 2 | FALSE | chr9:2197<br>4726:G:A       | 127:chr9:2<br>1974726:G<br>:A   | 0.001468 |
| 112_bl-1 | 112 | FGFR3  | MODERATE           | c.905G>A                                                                        | p.Gly302Asp                                                                                                     | 1 | FALSE | chr4:1803<br>727:G:A        | 127:chr4:1<br>803727:G:<br>A    | 0.001307 |
| 112_bl-1 | 112 | ATM    | HIGH               | c.103C>T                                                                        | p.Arg35*                                                                                                        | 0 | FALSE | chr11:108<br>098533:C:<br>T | 127:chr11:<br>10809853<br>3:C:T | 0.001325 |
| 112_bl-1 | 112 | KIT    | MODERATE           | c.2854C>T;<br>c.2866C>T                                                         | p.Arg952Trp<br>;<br>p.Arg956Trp                                                                                 | 3 | FALSE | chr4:5560<br>4658:C:T       | 127:chr4:5<br>5604658:C<br>:T   | 0.001172 |

|          |     |                           |                         |                                                                                                             |                                                          |     |       |                    |                        |          |
|----------|-----|---------------------------|-------------------------|-------------------------------------------------------------------------------------------------------------|----------------------------------------------------------|-----|-------|--------------------|------------------------|----------|
| 112_bl-1 | 112 | IGF1R                     | MODERATE                | c.3862G>A;<br>;<br>c.3865G>A                                                                                | p.Glu1288Lys;<br>p.Glu1289Lys                            | 0   | FALSE | chr15:99500432:G:A | 127:chr15:99500432:G:A | 0.001195 |
| 112_bl-1 | 112 | CWH43                     | MODERATE                | c.1535G>A;<br>;<br>c.1616G>A                                                                                | p.Gly512Asp;<br>;<br>p.Gly539Asp                         | 0   | FALSE | chr4:49034690:G:A  | 127:chr4:49034690:G:A  | 0.001053 |
| 112_bl-1 | 112 | FGFR3                     | MODIFIER; MODERATE      | c.931-374G>A;<br>;<br>c.1196G>A;<br>;<br>c.1202G>A                                                          | p.Arg399His;<br>;<br>p.Arg401His                         | 1   | FALSE | chr4:1806177:G:A   | 127:chr4:1806177:G:A   | 0.001351 |
| 112_bl-1 | 112 | IDH2                      | MODERATE                | c.125G>T;<br>;<br>c.359G>T;<br>;<br>c.515G>T                                                                | p.Arg42Met;<br>p.Arg120Met;<br>;<br>p.Arg172Met          | 199 | FALSE | chr15:90631838:C:A | 127:chr15:90631838:C:A | 0.001159 |
| 112_bl-1 | 112 | DDR2                      | MODERATE                | c.757G>A                                                                                                    | p.Gly253Ser                                              | 1   | FALSE | chr1:162729671:G:A | 127:chr1:162729671:G:A | 0.001172 |
| 112_bl-1 | 112 | CDKN2A                    | MODIFIER; MODERATE      | c.194-3531C>T;<br>;<br>c.89C>T                                                                              | p.Ala30Val                                               | 3   | FALSE | chr9:21974738:G:A  | 127:chr9:21974738:G:A  | 0.001498 |
| 112_bl-1 | 112 | TP53                      | LOW; MODIFIER; MODERATE | c.-6C>T;<br>;<br>c.355C>T;<br>;<br>c.472C>T;<br>;<br>c.76C>T                                                | p.Arg119Cys;<br>;<br>p.Arg158Cys;<br>;<br>p.Arg26Cys     | 17  | FALSE | chr17:7578458:G:A  | 127:chr17:7578458:G:A  | 0.001165 |
| 112_bl-1 | 112 | MIR1225;<br>PKD1;<br>TSC2 | MODIFIER; MODERATE      | n.*90C>T;<br>;<br>c.*13118C>T;<br>;<br>c.*13121C>T;<br>;<br>c.4906G>A;<br>;<br>c.5038G>A;<br>;<br>c.5107G>A | p.Val1636Met;<br>;<br>p.Val1680Met;<br>;<br>p.Val1703Met | 0   | FALSE | chr16:2138087:G:A  | 127:chr16:2138087:G:A  | 0.002377 |
| 112_bl-1 | 112 | FGFR4                     | MODERATE                | c.461G>A                                                                                                    | p.Arg154His                                              | 3   | FALSE | chr5:176517963:G:A | 127:chr5:176517963:G:A | 0.001181 |
| 5_t2c9-1 | 5   | BRAF                      | MODERATE                | c.1796C>T                                                                                                   | p.Thr599Ile                                              | 4   | FALSE | chr7:140453139:G:A | 128:chr7:140453139:G:A | 0.001857 |
| 5_t2c9-1 | 5   | IGF1R                     | MODERATE                | c.2453C>T                                                                                                   | p.Ser818Phe                                              | 0   | FALSE | chr15:99465628:C:T | 128:chr15:99465628:C:T | 0.001967 |
| 5_t2c9-1 | 5   | RPL19                     | MODERATE                | c.406C>T                                                                                                    | p.Arg136Trp                                              | 0   | FALSE | chr17:37360379:C:T | 128:chr17:37360379:C:T | 0.001874 |
| 5_t2c9-1 | 5   | PDGFRA                    | MODERATE                | c.1711G>A                                                                                                   | p.Glu571Lys                                              | 1   | FALSE | chr4:55141065:G:A  | 128:chr4:55141065:G:A  | 0.002014 |

|          |   |                    |                    |                                                                                                                           |                                                                                                                                                              |    |       |                             |                                 |          |
|----------|---|--------------------|--------------------|---------------------------------------------------------------------------------------------------------------------------|--------------------------------------------------------------------------------------------------------------------------------------------------------------|----|-------|-----------------------------|---------------------------------|----------|
| 5_t2c9-1 | 5 | NTRK3              | MODERATE           | c.1351C>T;<br>c.1375C>T                                                                                                   | p.Arg451Trp<br>;<br>p.Arg459Trp                                                                                                                              | 0  | FALSE | chr15:886<br>69523:G:A      | 128:chr15:<br>88669523:<br>G:A  | 0.001927 |
| 5_t2c9-1 | 5 | PIK3CA             | MODERATE           | c.277C>T                                                                                                                  | p.Arg93Trp                                                                                                                                                   | 24 | FALSE | chr3:1789<br>16890:C:T      | 128:chr3:1<br>78916890:<br>C:T  | 0.002433 |
| 5_t2c9-1 | 5 | IGF1R              | MODERATE           | c.676G>A                                                                                                                  | p.Glu226Lys                                                                                                                                                  | 0  | FALSE | chr15:994<br>34589:G:A      | 128:chr15:<br>99434589:<br>G:A  | 0.00224  |
| 5_t2c9-1 | 5 | NTRK1              | MODERATE           | c.821C>T;<br>c.911C>T                                                                                                     | p.Ser274Phe<br>;<br>p.Ser304Phe                                                                                                                              | 1  | FALSE | chr1:1568<br>43485:C:T      | 128:chr1:1<br>56843485:<br>C:T  | 0.002176 |
| 5_t2c9-1 | 5 | KDR                | MODERATE           | c.1040G>A                                                                                                                 | p.Arg347His                                                                                                                                                  | 4  | FALSE | chr4:5597<br>6872:C:T       | 128:chr4:5<br>5976872:C<br>:T   | 0.001478 |
| 5_t2c9-1 | 5 | ALK                | MODERATE           | c.4517C>T                                                                                                                 | p.Thr1506M<br>et                                                                                                                                             | 2  | FALSE | chr2:2941<br>6436:G:A       | 128:chr2:2<br>9416436:G<br>:A   | 0.001476 |
| 5_t2c9-1 | 5 | FGFR2              | MODERATE; MODIFIER | c.1639C>T;<br>c.1642C>T;<br>c.1645C>T;<br>c.1654C>T;<br>c.1723C>T;<br>c.1726C>T;<br>c.1990C>T;<br>c.1993C>T;<br>n.2440C>T | p.Arg547Trp<br>;<br>p.Arg548Trp<br>;<br>p.Arg549Trp<br>;<br>p.Arg552Trp<br>;<br>p.Arg575Trp<br>;<br>p.Arg576Trp<br>;<br>p.Arg664Trp<br>;<br>p.Arg665Trp<br>; | 2  | FALSE | chr10:123<br>246935:G:<br>A | 128:chr10:<br>12324693<br>5:G:A | 0.002911 |
| 5_t2c9-1 | 5 | ATM                | HIGH               | c.5623C>T                                                                                                                 | p.Arg1875*                                                                                                                                                   | 0  | FALSE | chr11:108<br>175528:C:<br>T | 128:chr11:<br>10817552<br>8:C:T | 0.001947 |
| 5_t2c9-1 | 5 | FGFR2              | MODIFIER; MODERATE | c.110-<br>14065C>T;<br>c.110-<br>945C>T;<br>n.757-<br>14065C>T;<br>c.290C>T                                               | p.Ala97Val                                                                                                                                                   | 1  | FALSE | chr10:123<br>325038:G:<br>A | 128:chr10:<br>12332503<br>8:G:A | 0.001976 |
| 5_t2c9-1 | 5 | MIR4673;<br>NOTCH1 | MODIFIER; MODERATE | n.*59A>G;<br>c.890A>G                                                                                                     | p.Asp297Gly                                                                                                                                                  | 0  | FALSE | chr9:1394<br>13252:T:C      | 128:chr9:1<br>39413252:<br>T:C  | 0.002064 |
| 5_t2c9-1 | 5 | ATM                | HIGH               | c.2558C>A                                                                                                                 | p.Ser853*                                                                                                                                                    | 0  | FALSE | chr11:108<br>137989:C:<br>A | 128:chr11:<br>10813798<br>9:C:A | 0.001661 |
| 5_t2c9-1 | 5 | FGFR4              | MODERATE           | c.238C>T                                                                                                                  | p.Arg80Trp                                                                                                                                                   | 3  | FALSE | chr5:1765<br>17537:C:T      | 128:chr5:1<br>76517537:<br>C:T  | 0.002123 |

|          |   |                    |                            |                                                           |                                                     |     |       |                        |                                |          |
|----------|---|--------------------|----------------------------|-----------------------------------------------------------|-----------------------------------------------------|-----|-------|------------------------|--------------------------------|----------|
| 5_t2c9-1 | 5 | FGFR4              | MODERATE                   | c.1978G>A<br>;<br>c.2062G>A<br>;<br>c.2182G>A             | p.Ala660Thr<br>;<br>p.Ala688Thr<br>;<br>p.Ala728Thr | 1   | FALSE | chr5:1765<br>24321:G:A | 128:chr5:1<br>76524321:<br>G:A | 0.003891 |
| 5_t2c9-1 | 5 | C9orf53;<br>CDKN2A | MODIFIER; MODERATE;<br>LOW | n.*616G>A<br>;<br>c.*256C>T;<br>c.376C>T;<br>c.333C>T     | p.Pro126Ser<br>;<br>p.Gly111Gly                     | 2   | FALSE | chr9:2197<br>1025:G:A  | 128:chr9:2<br>1971025:G<br>:A  | 0.0033   |
| 5_t2c9-1 | 5 | IGF1R              | MODERATE                   | c.2342G>A                                                 | p.Arg781Lys                                         | 0   | FALSE | chr15:994<br>65517:G:A | 128:chr15:<br>99465517:<br>G:A | 0.001762 |
| 5_t2c9-1 | 5 | C9orf53;<br>CDKN2A | MODIFIER; MODERATE         | n.*616C>T<br>;<br>c.*245G>A<br>;<br>c.322G>A;<br>c.365G>A | p.Asp108As<br>n;<br>p.Arg122Gln                     | 14  | FALSE | chr9:2197<br>1036:C:T  | 128:chr9:2<br>1971036:C<br>:T  | 0.003413 |
| 5_t2c9-1 | 5 | TP53               | HIGH                       | c.439C>T;<br>c.520C>T;<br>c.799C>T;<br>c.916C>T           | p.Arg147*;<br>p.Arg174*;<br>p.Arg267*;<br>p.Arg306* | 167 | FALSE | chr17:757<br>7022:G:A  | 128:chr17:<br>7577022:G<br>:A  | 0.001974 |
| 5_t2c9-1 | 5 | INSRR;<br>NTRK1    | MODIFIER; MODERATE         | c.3397+13<br>C>T;<br>c.28G>A                              | p.Ala10Thr                                          | 1   | FALSE | chr1:1568<br>11891:G:A | 128:chr1:1<br>56811891:<br>G:A | 0.001468 |
| 5_t2c9-1 | 5 | RET                | MODERATE                   | c.1907C>T                                                 | p.Thr636Met                                         | 1   | FALSE | chr10:436<br>09955:C:T | 128:chr10:<br>43609955:<br>C:T | 0.001575 |
| 5_t2c9-1 | 5 | PTEN               | MODERATE                   | c.424C>T                                                  | p.Arg142Trp                                         | 6   | FALSE | chr10:896<br>92940:C:T | 128:chr10:<br>89692940:<br>C:T | 0.001852 |
| 5_t2c9-1 | 5 | HOXD-AS2;<br>HOXD8 | MODIFIER; MODERATE         | n.*692C>T<br>;<br>c.304G>A;<br>c.853G>A;<br>c.856G>A      | p.Glu102Lys<br>;<br>p.Glu285Lys<br>;<br>p.Glu286Lys | 0   | FALSE | chr2:1769<br>96323:G:A | 128:chr2:1<br>76996323:<br>G:A | 0.001646 |
| 5_t2c9-1 | 5 | PDGFRA             | MODERATE                   | c.401C>T                                                  | p.Thr134Met                                         | 3   | FALSE | chr4:5512<br>9867:C:T  | 128:chr4:5<br>5129867:C<br>:T  | 0.001925 |
| 5_t2c9-1 | 5 | FLT3               | MODERATE                   | c.2822C>T                                                 | p.Ser941Leu                                         | 0   | FALSE | chr13:285<br>88626:G:A | 128:chr13:<br>28588626:<br>G:A | 0.001559 |
| 5_t2c9-1 | 5 | ALK                | MODERATE                   | c.1753G>A                                                 | p.Ala585Thr                                         | 3   | FALSE | chr2:2951<br>9818:C:T  | 128:chr2:2<br>9519818:C<br>:T  | 0.001711 |

|          |     |        |                    |                                                      |                                                                         |    |       |                             |                                 |          |
|----------|-----|--------|--------------------|------------------------------------------------------|-------------------------------------------------------------------------|----|-------|-----------------------------|---------------------------------|----------|
| 5_t2c9-1 | 5   | TP53   | MODERATE           | c.200G>A;<br>c.281G>A;<br>c.560G>A;<br>c.677G>A      | p.Gly67Asp;<br>p.Gly94Asp;<br>p.Gly187Asp<br>;<br>p.Gly226Asp           | 5  | FALSE | chr17:757<br>7604:C:T       | 128:chr17:<br>7577604:C<br>:T   | 0.001778 |
| 5_t2c9-1 | 5   | EPHA3  | MODERATE           | c.2306G>A                                            | p.Arg769His                                                             | 0  | FALSE | chr3:8948<br>0469:G:A       | 128:chr3:8<br>9480469:G<br>:A   | 0.001761 |
| 5_t2c9-1 | 5   | NF1    | HIGH               | c.1105C>T                                            | p.Gln369*                                                               | 2  | FALSE | chr17:295<br>28097:C:T      | 128:chr17:<br>29528097:<br>C:T  | 0.003363 |
| 5_t2c9-1 | 5   | FGFR4  | MODERATE; LOW      | c.1186G>A<br>;<br>c.1306G>A<br>;<br>c.1152G>A        | p.Val396Me<br>t;<br>p.Val436Me<br>t;<br>p.Ala384Ala                     | 1  | FALSE | chr5:1765<br>20461:G:A      | 128:chr5:1<br>76520461:<br>G:A  | 0.001934 |
| 5_t2c9-1 | 5   | STK11  | MODERATE           | c.647C>T                                             | p.Ser216Phe                                                             | 3  | FALSE | chr19:122<br>0629:C:T       | 128:chr19:<br>1220629:C<br>:T   | 0.004032 |
| 5_t2c9-1 | 5   | PIK3CA | MODERATE           | c.2078G>A                                            | p.Arg693His                                                             | 1  | FALSE | chr3:1789<br>38836:G:A      | 128:chr3:1<br>78938836:<br>G:A  | 0.001932 |
| 5_t2c9-1 | 5   | ATM    | HIGH               | c.5188C>T                                            | p.Arg1730*                                                              | 0  | FALSE | chr11:108<br>172385:C:<br>T | 128:chr11:<br>10817238<br>5:C:T | 0.002548 |
| 112_c2-1 | 112 | PIK3R1 | MODERATE           | c.1508G>A<br>;<br>c.419G>A;<br>c.608G>A;<br>c.698G>A | p.Arg503Gln<br>;<br>p.Arg140Gln<br>;<br>p.Arg203Gln<br>;<br>p.Arg233Gln | 2  | FALSE | chr5:6759<br>0446:G:A       | 130:chr5:6<br>7590446:G<br>:A   | 0.000772 |
| 112_c2-1 | 112 | MET    | HIGH               | c.1639C>T                                            | p.Arg547*                                                               | 2  | FALSE | chr7:1163<br>81017:C:T      | 130:chr7:1<br>16381017:<br>C:T  | 0.000636 |
| 112_c2-1 | 112 | EGFR   | MODERATE           | c.494G>A                                             | p.Arg165Gln                                                             | 3  | FALSE | chr7:5521<br>4368:G:A       | 130:chr7:5<br>5214368:G<br>:A   | 0.000834 |
| 112_c2-1 | 112 | HGF    | HIGH               | c.1582C>T;<br>c.1597C>T                              | p.Arg528*;<br>p.Arg533*                                                 | 0  | FALSE | chr7:8133<br>6625:G:A       | 130:chr7:8<br>1336625:G<br>:A   | 0.000959 |
| 112_c2-1 | 112 | CWH43  | MODERATE           | c.1535G>A<br>;<br>c.1616G>A                          | p.Gly512Asp<br>;<br>p.Gly539Asp                                         | 0  | FALSE | chr4:4903<br>4690:G:A       | 130:chr4:4<br>9034690:G<br>:A   | 0.001142 |
| 112_c2-1 | 112 | TP53   | MODIFIER; MODERATE | c.-17G>A;<br>c.344G>A;<br>c.461G>A;<br>c.65G>A       | p.Gly115Asp<br>;<br>p.Gly154Asp<br>;<br>p.Gly22Asp                      | 39 | FALSE | chr17:757<br>8469:C:T       | 130:chr17:<br>7578469:C<br>:T   | 0.001555 |
| 112_c2-1 | 112 | BRAF   | MODERATE           | c.550G>A                                             | p.Ala184Thr                                                             | 1  | FALSE | chr7:1405<br>08750:C:T      | 130:chr7:1<br>40508750:<br>C:T  | 0.000801 |

|          |     |                 |                    |                                                            |                                                               |       |       |                        |                                |          |
|----------|-----|-----------------|--------------------|------------------------------------------------------------|---------------------------------------------------------------|-------|-------|------------------------|--------------------------------|----------|
| 112_c2-1 | 112 | FBXW7           | MODERATE           | c.232A>T;<br>c.346A>T;<br>c.586A>T                         | p.Thr78Ser;<br>p.Thr116Ser<br>;<br>p.Thr196Ser                | 0     | FALSE | chr4:1532<br>68222:T:A | 130:chr4:1<br>53268222:<br>T:A | 0.000898 |
| 112_c2-1 | 112 | TP53            | MODERATE           | c.110G>A;<br>c.191G>A;<br>c.470G>A;<br>c.587G>A            | p.Arg37Gln;<br>p.Arg64Gln;<br>p.Arg157Gln<br>;<br>p.Arg196Gln | 19    | FALSE | chr17:757<br>8262:C:T  | 130:chr17:<br>7578262:C<br>:T  | 0.000734 |
| 112_c2-1 | 112 | FGFR4           | MODIFIER; MODERATE | c.1058-<br>174G>A;<br>;<br>c.1078G>A                       | p.Ala360Thr                                                   | 1     | FALSE | chr5:1765<br>20159:G:A | 130:chr5:1<br>76520159:<br>G:A | 0.000817 |
| 112_c2-1 | 112 | TSC1            | HIGH               | c.1921C>T;<br>c.2071C>T;<br>c.2074C>T                      | p.Arg641*;<br>p.Arg691*;<br>p.Arg692*                         | 0     | FALSE | chr9:1357<br>79172:G:A | 130:chr9:1<br>35779172:<br>G:A | 0.000719 |
| 112_c2-1 | 112 | TP53            | MODERATE           | c.101C>T;<br>c.20C>T;<br>c.380C>T;<br>c.497C>T             | p.Ser34Leu;<br>p.Ser7Leu;<br>p.Ser127Leu<br>;<br>p.Ser166Leu  | 12    | FALSE | chr17:757<br>8433:G:A  | 130:chr17:<br>7578433:G<br>:A  | 0.00076  |
| 112_c2-1 | 112 | BRAF            | MODERATE           | c.1799T>A                                                  | p.Val600Glu                                                   | 23024 | FALSE | chr7:1404<br>53136:A:T | 130:chr7:1<br>40453136:<br>A:T | 0.008217 |
| 112_c2-1 | 112 | ESR1            | MODERATE           | c.1468G>A<br>;<br>c.1471G>A<br>;<br>c.1477G>A              | p.Ala490Thr<br>;<br>p.Ala491Thr<br>;<br>p.Ala493Thr           | 0     | FALSE | chr6:1524<br>15621:G:A | 130:chr6:1<br>52415621:<br>G:A | 0.000737 |
| 112_c2-1 | 112 | NTRK1           | MODERATE           | c.804C>G;<br>c.894C>G                                      | p.His268Gln<br>;<br>p.His298Gln                               | 1     | FALSE | chr1:1568<br>43468:C:G | 130:chr1:1<br>56843468:<br>C:G | 0.00225  |
| 112_c2-1 | 112 | PIK3CA          | MODERATE           | c.3141T>A                                                  | p.His1047Gln                                                  | 4     | FALSE | chr3:1789<br>52086:T:A | 130:chr3:1<br>78952086:<br>T:A | 0.000709 |
| 112_c2-1 | 112 | FLT3            | MODERATE           | c.2822C>T                                                  | p.Ser941Leu                                                   | 0     | FALSE | chr13:285<br>88626:G:A | 130:chr13:<br>28588626:<br>G:A | 0.000714 |
| 112_c2-1 | 112 | PDGFRA          | MODERATE           | c.577G>A                                                   | p.Val193Ile                                                   | 2     | FALSE | chr4:5513<br>0043:G:A  | 130:chr4:5<br>5130043:G<br>:A  | 0.00097  |
| 112_c2-1 | 112 | IDH2;<br>ZNF710 | MODERATE; MODIFIER | c.1108G>A<br>;<br>c.718G>A;<br>c.952G>A;<br>c.*2147C><br>T | p.Ala370Thr<br>;<br>p.Ala240Thr<br>;<br>p.Ala318Thr<br>;      | 1     | FALSE | chr15:906<br>28303:C:T | 130:chr15:<br>90628303:<br>C:T | 0.000975 |

|          |     |                    |                    |                                                       |                                                     |     |       |                             |                                 |          |
|----------|-----|--------------------|--------------------|-------------------------------------------------------|-----------------------------------------------------|-----|-------|-----------------------------|---------------------------------|----------|
| 112_c2-1 | 112 | MIR4673;<br>NOTCH1 | MODIFIER; HIGH     | n.*59C>T;<br>c.1324C>T                                | ; p.Gln442*                                         | 0   | FALSE | chr9:1394<br>12321:G:A      | 130:chr9:1<br>39412321:<br>G:A  | 0.000999 |
| 112_c2-1 | 112 | NOTCH1             | MODERATE           | c.4984C>T                                             | p.Arg1662Tr<br>p                                    | 0   | FALSE | chr9:1393<br>99159:G:A      | 130:chr9:1<br>39399159:<br>G:A  | 0.001129 |
| 112_c2-1 | 112 | PIK3CA             | MODERATE           | c.2984C>A                                             | p.Ala995Asp                                         | 1   | FALSE | chr3:1789<br>51929:C:A      | 130:chr3:1<br>78951929:<br>C:A  | 0.000788 |
| 112_c2-1 | 112 | C9orf53;<br>CDKN2A | MODIFIER; MODERATE | n.*616G>A<br>;<br>c.*324C>T;<br>c.*45C>T;<br>c.401C>T | ; p.Ala134Val                                       | 1   | FALSE | chr9:2197<br>0957:G:A       | 130:chr9:2<br>1970957:G<br>:A   | 0.000892 |
| 112_c2-1 | 112 | NTRK3              | MODERATE           | c.1585G>T<br>;<br>c.1609G>T                           | p.Asp529Tyr<br>;<br>p.Asp537Tyr                     | 0   | FALSE | chr15:884<br>83961:C:A      | 130:chr15:<br>88483961:<br>C:A  | 0.000833 |
| 112_c2-1 | 112 | TP53               | HIGH               | c.439C>T;<br>c.520C>T;<br>c.799C>T;<br>c.916C>T       | p.Arg147*;<br>p.Arg174*;<br>p.Arg267*;<br>p.Arg306* | 167 | FALSE | chr17:757<br>7022:G:A       | 130:chr17:<br>7577022:G<br>:A   | 0.000738 |
| 112_c2-1 | 112 | TSC1               | MODERATE           | c.1547C>T;<br>c.1697C>T;<br>c.1700C>T                 | p.Ala516Val;<br>p.Ala566Val;<br>p.Ala567Val         | 0   | FALSE | chr9:1357<br>81265:G:A      | 130:chr9:1<br>35781265:<br>G:A  | 0.00101  |
| 112_c2-1 | 112 | FBXW7              | MODERATE           | c.317G>A;<br>c.431G>A;<br>c.671G>A                    | p.Arg106Gln<br>;<br>p.Arg144Gln<br>;<br>p.Arg224Gln | 0   | FALSE | chr4:1532<br>68137:C:T      | 130:chr4:1<br>53268137:<br>C:T  | 0.000721 |
| 112_c2-1 | 112 | MAP2K1             | MODERATE           | c.146G>A                                              | p.Arg49His                                          | 1   | FALSE | chr15:667<br>27430:G:A      | 130:chr15:<br>66727430:<br>G:A  | 0.000777 |
| 112_c2-1 | 112 | ATM                | MODERATE           | c.1351C>T                                             | p.Arg451Cys                                         | 0   | FALSE | chr11:108<br>121543:C:<br>T | 130:chr11:<br>10812154<br>3:C:T | 0.000721 |
| 112_c2-1 | 112 | PDGFRA             | MODERATE           | c.533T>C                                              | p.Phe178Ser                                         | 1   | FALSE | chr4:5512<br>9999:T:C       | 130:chr4:5<br>5129999:T<br>:C   | 0.000698 |
| 112_c2-1 | 112 | HRAS;<br>LRRCS6    | MODERATE; MODIFIER | c.368G>A;<br>c.-506C>T                                | p.Arg123His<br>;                                    | 2   | FALSE | chr11:533<br>535:C:T        | 130:chr11:<br>533535:C:<br>T    | 0.000794 |
| 112_c2-1 | 112 | KIT                | MODERATE           | c.506G>A                                              | p.Gly169Asp                                         | 1   | FALSE | chr4:5556<br>4618:G:A       | 130:chr4:5<br>5564618:G<br>:A   | 0.00071  |
| 112_c2-1 | 112 | NF1                | MODERATE           | c.467G>A                                              | p.Arg156His                                         | 1   | FALSE | chr17:294<br>90382:G:A      | 130:chr17:<br>29490382:<br>G:A  | 0.000869 |
| 112_c2-1 | 112 | AKT3               | MODERATE           | c.899C>T                                              | p.Ala300Val                                         | 0   | FALSE | chr1:2437<br>27071:G:A      | 130:chr1:2<br>43727071:<br>G:A  | 0.000818 |

|          |     |        |                    |                                                                                  |                                                                                        |    |       |                             |                                 |          |
|----------|-----|--------|--------------------|----------------------------------------------------------------------------------|----------------------------------------------------------------------------------------|----|-------|-----------------------------|---------------------------------|----------|
| 112_c2-1 | 112 | TP53   | MODERATE           | c.223T>C;<br>c.304T>C;<br>c.583T>C;<br>c.700T>C                                  | p.Tyr75His;<br>p.Tyr102His;<br>p.Tyr195His;<br>p.Tyr234His                             | 24 | FALSE | chr17:757<br>7581:A:G       | 130:chr17:<br>7577581:A<br>:G   | 0.001332 |
| 112_c2-1 | 112 | MITF   | MODIFIER; MODERATE | c.93+115G<br>>A;<br>c.208G>A;<br>c.373G>A;<br>c.481G>A;<br>c.526G>A;<br>c.529G>A | p.Ala70Thr;<br>p.Ala125Thr<br>;<br>p.Ala161Thr<br>;<br>p.Ala176Thr<br>;<br>p.Ala177Thr | 0  | FALSE | chr3:6998<br>7147:G:A       | 130:chr3:6<br>9987147:G<br>:A   | 0.001219 |
| 112_c2-1 | 112 | KIT    | MODERATE           | c.251C>T                                                                         | p.Thr84Met                                                                             | 1  | FALSE | chr4:5556<br>1861:C:T       | 130:chr4:5<br>5561861:C<br>:T   | 0.00072  |
| 112_c2-1 | 112 | BRAF   | MODERATE           | c.436C>T                                                                         | p.Arg146Trp                                                                            | 1  | FALSE | chr7:1405<br>34477:G:A      | 130:chr7:1<br>40534477:<br>G:A  | 0.000727 |
| 112_c2-1 | 112 | PDGFRA | MODERATE           | c.187G>A                                                                         | p.Glu63Lys                                                                             | 1  | FALSE | chr4:5512<br>7399:G:A       | 130:chr4:5<br>5127399:G<br>:A   | 0.00076  |
| 112_c2-1 | 112 | CDH1   | HIGH               | c.1596G>A                                                                        | p.Trp532*                                                                              | 0  | FALSE | chr16:688<br>53213:G:A      | 130:chr16:<br>68853213:<br>G:A  | 0.000848 |
| 112_c2-1 | 112 | EGFR   | MODERATE           | c.445C>T                                                                         | p.Arg149Trp                                                                            | 1  | FALSE | chr7:5521<br>4319:C:T       | 130:chr7:5<br>5214319:C<br>:T   | 0.000893 |
| 112_c2-1 | 112 | FGFR2  | MODERATE; MODIFIER | c.263G>A;<br>c.341G>A;<br>c.608G>A;<br>n.910G>A                                  | p.Arg88His;<br>p.Arg114His<br>;<br>p.Arg203His<br>;                                    | 2  | FALSE | chr10:123<br>310820:C:<br>T | 130:chr10:<br>12331082<br>0:C:T | 0.001592 |
| 112_c2-1 | 112 | GNA11  | MODERATE           | c.766C>T                                                                         | p.Arg256Trp                                                                            | 1  | FALSE | chr19:311<br>9234:C:T       | 130:chr19:<br>3119234:C<br>:T   | 0.000799 |
| 112_c2-1 | 112 | PTEN   | HIGH               | c.822G>A                                                                         | p.Trp274*                                                                              | 3  | FALSE | chr10:897<br>20671:G:A      | 130:chr10:<br>89720671:<br>G:A  | 0.004956 |
| 112_c2-1 | 112 | TP53   | MODIFIER; HIGH     | c.-48C>T;<br>c.313C>T;<br>c.34C>T;<br>c.430C>T                                   | ; p.Gln105*;<br>p.Gln12*;<br>p.Gln144*                                                 | 42 | FALSE | chr17:757<br>8500:G:A       | 130:chr17:<br>7578500:G<br>:A   | 0.000753 |
| 112_c2-1 | 112 | GNA11  | MODERATE           | c.440G>A                                                                         | p.Arg147His                                                                            | 1  | FALSE | chr19:311<br>3446:G:A       | 130:chr19:<br>3113446:G<br>:A   | 0.000894 |
| 112_c2-1 | 112 | PTEN   | HIGH               | c.821G>A                                                                         | p.Trp274*                                                                              | 6  | FALSE | chr10:897<br>20670:G:A      | 130:chr10:<br>89720670:<br>G:A  | 0.001121 |



|          |     |                    |                    |                                                     |                               |    |       |                             |                                 |          |
|----------|-----|--------------------|--------------------|-----------------------------------------------------|-------------------------------|----|-------|-----------------------------|---------------------------------|----------|
| 112_c2-1 | 112 | CTNNB1             | MODERATE           | c.1406G>A                                           | p.Arg469His                   | 0  | FALSE | chr3:4127<br>5240:G:A       | 130:chr3:4<br>1275240:G<br>:A   | 0.000659 |
| 112_c2-1 | 112 | MET                | MODERATE           | c.3443G>A<br>;<br>c.3497G>A                         | p.Arg1148Gln;<br>p.Arg1166Gln | 4  | FALSE | chr7:1164<br>18932:G:A      | 130:chr7:1<br>16418932:<br>G:A  | 0.000823 |
| 112_c2-1 | 112 | MIR4673;<br>NOTCH1 | MODIFIER; MODERATE | n.*59G>A;<br>c.1058G>A                              | p.Arg353His                   | 0  | FALSE | chr9:1394<br>13084:C:T      | 130:chr9:1<br>39413084:<br>C:T  | 0.001221 |
| 112_c2-1 | 112 | APC                | MODIFIER; MODERATE | c.676-<br>8791C>T;<br>c.688C>T                      | p.Arg230Cys                   | 0  | FALSE | chr5:1121<br>28185:C:T      | 130:chr5:1<br>12128185:<br>C:T  | 0.001332 |
| 112_c2-1 | 112 | EGFR               | MODERATE           | c.755G>A                                            | p.Arg252His                   | 3  | FALSE | chr7:5522<br>1711:G:A       | 130:chr7:5<br>5221711:G<br>:A   | 0.001261 |
| 112_c2-1 | 112 | ALK                | MODERATE           | c.617C>T                                            | p.Ala206Val                   | 2  | FALSE | chr2:3014<br>2909:G:A       | 130:chr2:3<br>0142909:G<br>:A   | 0.00096  |
| 112_c2-1 | 112 | PTEN               | MODERATE           | c.133G>A                                            | p.Val45Ile                    | 1  | FALSE | chr10:896<br>53835:G:A      | 130:chr10:<br>89653835:<br>G:A  | 0.000801 |
| 112_c2-1 | 112 | TP53               | MODIFIER; MODERATE | c.-1G>C; c.-<br>82G>C;<br>c.279G>C;<br>c.396G>C     | p.Lys93Asn;<br>p.Lys132Asn    | 34 | FALSE | chr17:757<br>8534:C:G       | 130:chr17:<br>7578534:C<br>:G   | 0.00076  |
| 112_c2-1 | 112 | IDH1               | MODERATE           | c.290G>A                                            | p.Gly97Asp                    | 4  | FALSE | chr2:2091<br>13217:C:T      | 130:chr2:2<br>09113217:<br>C:T  | 0.000819 |
| 112_c2-1 | 112 | AKT1               | MODERATE           | c.1112C>T                                           | p.Thr371Met                   | 1  | FALSE | chr14:105<br>239275:G:<br>A | 130:chr14:<br>10523927<br>5:G:A | 0.000835 |
| 112_c2-1 | 112 | ALK                | MODERATE           | c.4255G>A                                           | p.Glu1419Lys                  | 1  | FALSE | chr2:2941<br>6698:C:T       | 130:chr2:2<br>9416698:C<br>:T   | 0.000662 |
| 112_c2-1 | 112 | EGFR               | MODERATE           | c.940G>A                                            | p.Asp314Asn                   | 1  | FALSE | chr7:5522<br>3573:G:A       | 130:chr7:5<br>5223573:G<br>:A   | 0.000722 |
| 112_c2-1 | 112 | NRAS               | MODERATE           | c.553C>T                                            | p.Pro185Ser                   | 2  | FALSE | chr1:1152<br>51173:G:A      | 130:chr1:1<br>15251173:<br>G:A  | 0.000857 |
| 112_c2-1 | 112 | PHLPP1             | HIGH               | c.1885C>T                                           | p.Arg629*                     | 0  | FALSE | chr18:605<br>06128:C:T      | 130:chr18:<br>60506128:<br>C:T  | 0.001018 |
| 112_c2-1 | 112 | EVI2A; NF1         | MODIFIER; MODERATE | c.-266G>A;<br>c.-338G>A;<br>c.5020C>T;<br>c.5083C>T | p.Arg1674Trp;<br>p.Arg1695Trp | 1  | FALSE | chr17:296<br>53085:C:T      | 130:chr17:<br>29653085:<br>C:T  | 0.000688 |

|          |     |                    |                            |                                                   |                                                             |     |       |                    |                        |          |
|----------|-----|--------------------|----------------------------|---------------------------------------------------|-------------------------------------------------------------|-----|-------|--------------------|------------------------|----------|
| 112_c2-1 | 112 | EGFR               | MODIFIER; MODERATE         | c.*2133G>A;<br>c.*2364G>A;<br>c.2030G>A           | p.Arg677His                                                 | 5   | FALSE | chr7:55240786:G:A  | 130:chr7:55240786:G:A  | 0.001725 |
| 112_c2-1 | 112 | TP53               | MODERATE                   | c.341G>A;<br>c.422G>A;<br>c.701G>A;<br>c.818G>A   | p.Arg114His;<br>p.Arg141His;<br>p.Arg234His;<br>p.Arg273His | 647 | TRUE  | chr17:7577120:C:T  | 130:chr17:7577120:C:T  | 0.000817 |
| 112_c2-1 | 112 | ALK                | MODERATE                   | c.1753G>A                                         | p.Ala585Thr                                                 | 3   | FALSE | chr2:29519818:C:T  | 130:chr2:29519818:C:T  | 0.000716 |
| 112_c2-1 | 112 | EGFR;<br>EGFR-AS1  | MODERATE; MODIFIER         | c.2596G>A;<br>n.-1C>T                             | p.Glu866Lys                                                 | 3   | FALSE | chr7:55259538:G:A  | 130:chr7:55259538:G:A  | 0.000881 |
| 112_c2-1 | 112 | CTNNB1             | HIGH                       | c.74G>A                                           | p.Trp25*                                                    | 0   | FALSE | chr3:41266077:G:A  | 130:chr3:41266077:G:A  | 0.000784 |
| 112_c2-1 | 112 | C9orf53;<br>CDKN2A | MODIFIER; MODERATE;<br>LOW | n.*616G>A;<br>c.*165C>T;<br>c.242C>T;<br>c.285C>T | p.Pro81Leu;<br>p.Thr95Thr                                   | 9   | FALSE | chr9:21971116:G:A  | 130:chr9:21971116:G:A  | 0.000942 |
| 112_c2-1 | 112 | NTRK3              | MODERATE                   | c.1801G>A;<br>c.1825G>A                           | p.Asp601Asn;<br>p.Asp609Asn                                 | 0   | FALSE | chr15:88476307:C:T | 130:chr15:88476307:C:T | 0.000998 |
| 112_c2-1 | 112 | HOXD-AS2;<br>HOXD8 | MODIFIER; MODERATE         | n.*692C>T;<br>c.304G>A;<br>c.853G>A;<br>c.856G>A  | p.Glu102Lys;<br>p.Glu285Lys;<br>p.Glu286Lys                 | 0   | FALSE | chr2:176996323:G:A | 130:chr2:176996323:G:A | 0.001049 |
| 112_c2-1 | 112 | FGFR1              | LOW; MODIFIER;<br>MODERATE | c.-25C>T;<br>c.167C>T;<br>c.68C>T                 | p.Pro56Leu;<br>p.Pro23Leu                                   | 1   | FALSE | chr8:38314897:G:A  | 130:chr8:38314897:G:A  | 0.000726 |
| 112_c2-1 | 112 | EPHA3              | MODERATE                   | c.1543G>A                                         | p.Ala515Thr                                                 | 0   | FALSE | chr3:89448579:G:A  | 130:chr3:89448579:G:A  | 0.000834 |
| 112_c2-1 | 112 | FGFR3              | MODERATE                   | c.599G>A                                          | p.Arg200His                                                 | 1   | FALSE | chr4:1803247:G:A   | 130:chr4:1803247:G:A   | 0.001573 |
| 112_c2-1 | 112 | SMO                | MODERATE                   | c.781C>T                                          | p.Arg261Cys                                                 | 0   | FALSE | chr7:128845484:C:T | 130:chr7:128845484:C:T | 0.000779 |

|          |     |                                 |                     |                                                                                                                           |                                                                                                                                                         |     |       |                             |                                 |          |
|----------|-----|---------------------------------|---------------------|---------------------------------------------------------------------------------------------------------------------------|---------------------------------------------------------------------------------------------------------------------------------------------------------|-----|-------|-----------------------------|---------------------------------|----------|
| 112_c2-1 | 112 | FGFR2                           | MODERATE; MODIFIER  | c.1639C>T;<br>c.1642C>T;<br>c.1645C>T;<br>c.1654C>T;<br>c.1723C>T;<br>c.1726C>T;<br>c.1990C>T;<br>c.1993C>T;<br>n.2440C>T | p.Arg547Trp<br>;<br>p.Arg548Trp<br>;<br>p.Arg549Trp<br>;<br>p.Arg552Trp<br>;<br>p.Arg575Trp<br>;<br>p.Arg576Trp<br>;<br>p.Arg664Trp<br>;<br>p.Arg665Trp | 2   | FALSE | chr10:123<br>246935:G:<br>A | 130:chr10:<br>12324693<br>5:G:A | 0.00126  |
| 112_c2-1 | 112 | IGF1R                           | MODERATE            | c.3905T>C;<br>c.3908T>C                                                                                                   | p.Val1302Ala<br>;<br>p.Val1303Ala                                                                                                                       | 0   | FALSE | chr15:995<br>00475:T:C      | 130:chr15:<br>99500475:<br>T:C  | 0.001201 |
| 112_c2-1 | 112 | ERBB2;<br>MIEN1;<br>MIR4728     | MODIFIER; MODERATE  | c.3160-<br>213A>G;<br>c.3251A>G<br>;<br>c.3296A>G<br>;<br>c.3341A>G<br>;<br>n.3665A>G<br>;<br>c.*388T>C;<br>n.*67A>G      | p.Glu1084Gly<br>;<br>p.Glu1099Gly<br>;<br>p.Glu1114Gly                                                                                                  | 1   | FALSE | chr17:378<br>83729:A:G      | 130:chr17:<br>37883729:<br>A:G  | 0.000767 |
| 112_c2-1 | 112 | FOXL2;<br>FOXL2NB;<br>LINC01391 | MODERATE; MODIFIER  | c.112G>A;<br>c.-132C>T;<br>n.-1G>A                                                                                        | p.Gly38Ser;                                                                                                                                             | 0   | FALSE | chr3:1386<br>65453:C:T      | 130:chr3:1<br>38665453:<br>C:T  | 0.001004 |
| 112_c2-1 | 112 | FGFR3                           | MODERATE            | c.905G>A                                                                                                                  | p.Gly302Asp                                                                                                                                             | 1   | FALSE | chr4:1803<br>727:G:A        | 130:chr4:1<br>803727:G:<br>A    | 0.000884 |
| 112_c2-1 | 112 | TP53                            | MODIFIER; MODERATE  | c.-9G>A;<br>c.352G>A;<br>c.469G>A;<br>c.73G>A                                                                             | p.Val118Ile;<br>p.Val157Ile;<br>p.Val25Ile                                                                                                              | 169 | FALSE | chr17:757<br>8461:C:T       | 130:chr17:<br>7578461:C<br>:T   | 0.001537 |
| 112_c2-1 | 112 | FGFR2                           | MODIFIER; LOW; HIGH | c.749-<br>4848C>T;<br>n.1053C>T<br>;<br>c.406C>T;<br>c.484C>T;<br>c.751C>T                                                | p.Arg136*;<br>p.Arg162*;<br>p.Arg251*                                                                                                                   | 2   | FALSE | chr10:123<br>279681:G:<br>A | 130:chr10:<br>12327968<br>1:G:A | 0.000883 |

|                |     |                   |                    |                                                    |                                                                   |    |       |                             |                                 |          |
|----------------|-----|-------------------|--------------------|----------------------------------------------------|-------------------------------------------------------------------|----|-------|-----------------------------|---------------------------------|----------|
| 112_c2-1       | 112 | PTEN              | MODERATE           | c.361G>A                                           | p.Ala121Thr                                                       | 3  | FALSE | chr10:896<br>92877:G:A      | 130:chr10:<br>89692877:<br>G:A  | 0.00081  |
| 112_c2-1       | 112 | TP53              | MODERATE; MODIFIER | c.200C>T;<br>c.83C>T; c.-<br>279C>T; c.-<br>360C>T | p.Pro67Leu;<br>p.Pro28Leu;                                        | 1  | FALSE | chr17:757<br>9487:G:A       | 130:chr17:<br>7579487:G<br>:A   | 0.000933 |
| 112_c2-1       | 112 | FGFR3             | MODERATE           | c.1526G>A<br>;<br>c.1862G>A<br>;<br>c.1868G>A      | p.Arg509His<br>;<br>p.Arg621His<br>;<br>p.Arg623His               | 2  | FALSE | chr4:1807<br>803:G:A        | 130:chr4:1<br>807803:G:<br>A    | 0.00092  |
| 112_c2-1       | 112 | RET               | MODERATE           | c.2116G>A                                          | p.Val706Me<br>t                                                   | 2  | FALSE | chr10:436<br>10164:G:A      | 130:chr10:<br>43610164:<br>G:A  | 0.000669 |
| 112_c2-1       | 112 | IGF1R             | MODERATE           | c.3121C>T;<br>c.3124C>T                            | p.Arg1041C<br>ys;<br>p.Arg1042C<br>ys                             | 0  | FALSE | chr15:994<br>78220:C:T      | 130:chr15:<br>99478220:<br>C:T  | 0.001101 |
| 112_c2-1       | 112 | ATM               | MODERATE           | c.2075G>A                                          | p.Arg692His                                                       | 0  | FALSE | chr11:108<br>124717:G:<br>A | 130:chr11:<br>10812471<br>7:G:A | 0.002415 |
| 112_c2-1       | 112 | AKT1              | MODERATE           | c.932G>A                                           | p.Gly311Asp                                                       | 1  | FALSE | chr14:105<br>239613:C:<br>T | 130:chr14:<br>10523961<br>3:C:T | 0.000898 |
| 112_c2-1       | 112 | CACNB1;<br>RPL19  | MODIFIER; MODERATE | c.-209C>T;<br>c.82G>A                              | ; p.Glu28Lys                                                      | 0  | FALSE | chr17:373<br>57542:G:A      | 130:chr17:<br>37357542:<br>G:A  | 0.000737 |
| 112_c2-1       | 112 | EGFR;<br>EGFR-AS1 | MODERATE; MODIFIER | c.2507G>A<br>; n.-1C>T                             | p.Arg836His<br>;                                                  | 2  | FALSE | chr7:5525<br>9449:G:A       | 130:chr7:5<br>5259449:G<br>:A   | 0.000849 |
| 112_c2-1       | 112 | BRAF              | MODERATE           | c.305C>T                                           | p.Ser102Phe                                                       | 1  | FALSE | chr7:1405<br>34608:G:A      | 130:chr7:1<br>40534608:<br>G:A  | 0.000754 |
| 112_c2-1       | 112 | KIT               | MODERATE           | c.530G>A                                           | p.Arg177His                                                       | 1  | FALSE | chr4:5556<br>4642:G:A       | 130:chr4:5<br>5564642:G<br>:A   | 0.000693 |
| 112_c2-1       | 112 | PTEN              | MODERATE           | c.407G>A                                           | p.Cys136Tyr                                                       | 14 | FALSE | chr10:896<br>92923:G:A      | 130:chr10:<br>89692923:<br>G:A  | 0.000769 |
| 112_c2-1       | 112 | TP53              | MODERATE           | c.103C>T;<br>c.184C>T;<br>c.463C>T;<br>c.580C>T    | p.Leu35Phe;<br>p.Leu62Phe;<br>p.Leu155Ph<br>e;<br>p.Leu194Ph<br>e | 22 | FALSE | chr17:757<br>8269:G:A       | 130:chr17:<br>7578269:G<br>:A   | 0.000747 |
| 112_c2-1       | 112 | APC               | MODERATE           | c.1864C>T;<br>c.1918C>T                            | p.Arg622Trp<br>;<br>p.Arg640Trp                                   | 0  | FALSE | chr5:1121<br>70822:C:T      | 130:chr5:1<br>12170822:<br>C:T  | 0.000811 |
| 130_c1w1-<br>1 | 130 | NOTCH1            | MODERATE           | c.4987C>T                                          | p.Arg1663Tr<br>p                                                  | 0  | FALSE | chr9:1393<br>99156:G:A      | 131:chr9:1<br>39399156:<br>G:A  | 0.003759 |

|            |     |                             |                    |                                                                                                                           |                                                                                                                              |    |       |                             |                                 |          |
|------------|-----|-----------------------------|--------------------|---------------------------------------------------------------------------------------------------------------------------|------------------------------------------------------------------------------------------------------------------------------|----|-------|-----------------------------|---------------------------------|----------|
| 130_c1w1-1 | 130 | TP53                        | MODIFIER; MODERATE | c.-11G>A;<br>c.350G>A;<br>c.467G>A;<br>c.71G>A                                                                            | ; p.Arg117His<br>;<br>; p.Arg156His<br>; p.Arg24His                                                                          | 26 | FALSE | chr17:757<br>8463:C:T       | 131:chr17:<br>7578463:C<br>:T   | 0.002016 |
| 130_c1w1-1 | 130 | EPHA3                       | MODERATE           | c.2530C>T                                                                                                                 | p.Pro844Ser                                                                                                                  | 0  | FALSE | chr3:8949<br>9360:C:T       | 131:chr3:8<br>9499360:C<br>:T   | 0.00199  |
| 130_c1w1-1 | 130 | TP53                        | MODERATE; MODIFIER | c.239C>T;<br>c.356C>T;<br>c.-279C>T;<br>c.-360C>T                                                                         | p.Ala80Val;<br>p.Ala119Val;                                                                                                  | 1  | FALSE | chr17:757<br>9331:G:A       | 131:chr17:<br>7579331:G<br>:A   | 0.002896 |
| 130_c1w1-1 | 130 | PIK3CA                      | HIGH               | c.1656G>A                                                                                                                 | p.Trp552*                                                                                                                    | 1  | FALSE | chr3:1789<br>36114:G:A      | 131:chr3:1<br>78936114:<br>G:A  | 0.002176 |
| 130_c1w1-1 | 130 | NOTCH1                      | MODERATE           | c.6107C>T                                                                                                                 | p.Ala2036Val                                                                                                                 | 0  | FALSE | chr9:1393<br>93424:G:A      | 131:chr9:1<br>39393424:<br>G:A  | 0.001998 |
| 130_c1w1-1 | 130 | AKT1                        | MODERATE           | c.932G>A                                                                                                                  | p.Gly311Asp                                                                                                                  | 1  | FALSE | chr14:105<br>239613:C:<br>T | 131:chr14:<br>10523961<br>3:C:T | 0.002265 |
| 130_c1w1-1 | 130 | ERBB2;<br>MIEN1;<br>MIR4728 | MODERATE; MODIFIER | c.2720A>G<br>;<br>c.2765A>G<br>;<br>c.2810A>G<br>;<br>n.3134A>G<br>;<br>c.*388T>C;<br>n.-1A>G                             | p.Lys907Arg<br>;<br>; p.Lys922Arg<br>;<br>; p.Lys937Arg<br>;                                                                 | 1  | FALSE | chr17:378<br>82044:A:G      | 131:chr17:<br>37882044:<br>A:G  | 0.002051 |
| 130_c1w1-1 | 130 | FGFR2                       | MODERATE; MODIFIER | c.1481C>T;<br>c.1484C>T;<br>c.1487C>T;<br>c.1496C>T;<br>c.1565C>T;<br>c.1568C>T;<br>c.1832C>T;<br>c.1835C>T;<br>n.2282C>T | p.Ala494Val;<br>p.Ala495Val;<br>p.Ala496Val;<br>p.Ala499Val;<br>p.Ala522Val;<br>p.Ala523Val;<br>p.Ala611Val;<br>p.Ala612Val; | 1  | FALSE | chr10:123<br>256077:G:<br>A | 131:chr10:<br>12325607<br>7:G:A | 0.001786 |

|            |     |                    |                            |                                                                                                                            |                                                                    |    |       |                        |                                |          |
|------------|-----|--------------------|----------------------------|----------------------------------------------------------------------------------------------------------------------------|--------------------------------------------------------------------|----|-------|------------------------|--------------------------------|----------|
| 130_c1w1-1 | 130 | TP53               | MODERATE                   | c.248G>A;<br>c.329G>A;<br>c.608G>A;<br>c.725G>A                                                                            | p.Cys83Tyr;<br>p.Cys110Tyr<br>;<br>p.Cys203Tyr<br>;<br>p.Cys242Tyr | 72 | FALSE | chr17:757<br>7556:C:T  | 131:chr17:<br>7577556:C<br>:T  | 0.001815 |
| 130_c1w1-1 | 130 | NTRK1              | MODERATE                   | c.1751G>A<br>;<br>c.1841G>A<br>;<br>c.1859G>A                                                                              | p.Gly584Asp<br>;<br>p.Gly614Asp<br>;<br>p.Gly620Asp                | 1  | FALSE | chr1:1568<br>48967:G:A | 131:chr1:1<br>56848967:<br>G:A | 0.001874 |
| 130_c1w1-1 | 130 | NTRK1              | MODERATE                   | c.804C>G;<br>c.894C>G                                                                                                      | p.His268Gln<br>;<br>p.His298Gln                                    | 1  | FALSE | chr1:1568<br>43468:C:G | 131:chr1:1<br>56843468:<br>C:G | 0.002174 |
| 130_c1w1-1 | 130 | CSDE1;<br>NRAS     | MODIFIER; MODERATE         | c.*2430T><br>A;<br>c.*2523T><br>A;<br>c.*2817T><br>A;<br>c.*2910T><br>A;<br>c.*2964T><br>A;<br>c.*3057T><br>A;<br>c.190T>A | ; p.Tyr64Asn                                                       | 2  | FALSE | chr1:1152<br>56521:A:T | 131:chr1:1<br>15256521:<br>A:T | 0.002181 |
| 130_c1w1-1 | 130 | CDH1               | MODERATE                   | c.1223C>T                                                                                                                  | p.Ala408Val                                                        | 0  | FALSE | chr16:688<br>47301:C:T | 131:chr16:<br>68847301:<br>C:T | 0.001663 |
| 130_c1w1-1 | 130 | C9orf53;<br>CDKN2A | MODIFIER; MODERATE;<br>LOW | n.*616A>G<br>;<br>c.*117T>C;<br>c.194T>C;<br>c.237T>C                                                                      | p.Leu65Pro;<br>p.Ala79Ala                                          | 3  | FALSE | chr9:2197<br>1164:A:G  | 131:chr9:2<br>1971164:A<br>:G  | 0.002878 |
| 130_c1w1-1 | 130 | PDGFRA             | MODERATE                   | c.464C>T                                                                                                                   | p.Pro155Leu                                                        | 1  | FALSE | chr4:5512<br>9930:C:T  | 131:chr4:5<br>5129930:C<br>:T  | 0.001914 |
| 130_c1w1-1 | 130 | EGFR               | MODERATE                   | c.719G>A                                                                                                                   | p.Cys240Tyr                                                        | 1  | FALSE | chr7:522<br>0329:G:A   | 131:chr7:5<br>5220329:G<br>:A  | 0.001931 |
| 130_c1w1-1 | 130 | PIK3CA             | MODERATE                   | c.1193G>A                                                                                                                  | p.Arg398His                                                        | 1  | FALSE | chr3:1789<br>27430:G:A | 131:chr3:1<br>78927430:<br>G:A | 0.001965 |
| 130_c1w1-1 | 130 | MIR4673;<br>NOTCH1 | MODIFIER; MODERATE         | n.*59G>A;<br>c.976G>A                                                                                                      | ; p.Gly326Ser                                                      | 0  | FALSE | chr9:1394<br>13166:C:T | 131:chr9:1<br>39413166:<br>C:T | 0.002079 |
| 130_c1w1-1 | 130 | TP53               | MODERATE; MODIFIER         | c.208G>A;<br>c.91G>A; c.<br>279G>A; c.<br>360G>A                                                                           | p.Ala70Thr;<br>p.Ala31Thr;                                         | 1  | FALSE | chr17:757<br>9479:C:T  | 131:chr17:<br>7579479:C<br>:T  | 0.003676 |

|            |     |                                 |                    |                                                   |                                             |    |       |                    |                        |          |
|------------|-----|---------------------------------|--------------------|---------------------------------------------------|---------------------------------------------|----|-------|--------------------|------------------------|----------|
| 130_c1w1-1 | 130 | PIK3R1                          | MODERATE           | c.637G>A                                          | p.Val213Ile                                 | 2  | FALSE | chr5:67576358:G:A  | 131:chr5:67576358:G:A  | 0.00213  |
| 130_c1w1-1 | 130 | PDGFRA                          | MODERATE           | c.1495G>A                                         | p.Val499Met                                 | 2  | FALSE | chr4:55139834:G:A  | 131:chr4:55139834:G:A  | 0.001833 |
| 130_c1w1-1 | 130 | FBXW7                           | MODERATE           | c.182G>A;<br>c.296G>A;<br>c.536G>A                | p.Arg61His;<br>p.Arg99His;<br>p.Arg179His   | 0  | FALSE | chr4:153271242:C:T | 131:chr4:153271242:C:T | 0.001946 |
| 73_c6-1    | 73  | MET                             | MODERATE           | c.3749T>C;<br>c.3803T>C                           | p.Met1250Thr;<br>p.Met1268Thr               | 11 | FALSE | chr7:116423474:T:C | 132:chr7:116423474:T:C | 0.002597 |
| 73_c6-1    | 73  | FGFR3                           | MODIFIER; MODERATE | c.931-425G>A;<br>c.1145G>A;<br>c.1151G>A          | p.Gly382Asp;<br>p.Gly384Asp                 | 1  | FALSE | chr4:1806126:G:A   | 132:chr4:1806126:G:A   | 0.003106 |
| 73_c6-1    | 73  | NTRK2                           | MODERATE           | c.407G>A                                          | p.Arg136His                                 | 0  | FALSE | chr9:87322806:G:A  | 132:chr9:87322806:G:A  | 0.002985 |
| 73_c6-1    | 73  | HOXD-AS2;<br>HOXD8              | MODIFIER; MODERATE | n.*692C>T;<br>c.304G>A;<br>c.853G>A;<br>c.856G>A  | p.Glu102Lys;<br>p.Glu285Lys;<br>p.Glu286Lys | 0  | FALSE | chr2:176996323:G:A | 132:chr2:176996323:G:A | 0.003593 |
| 73_c6-1    | 73  | KIT                             | MODERATE           | c.365G>A                                          | p.Arg122His                                 | 1  | FALSE | chr4:55564477:G:A  | 132:chr4:55564477:G:A  | 0.002646 |
| 73_c6-1    | 73  | TP53                            | HIGH; MODIFIER     | c.156G>A;<br>c.273G>A;<br>c.-279G>A;<br>c.-360G>A | p.Trp52*;<br>p.Trp91*                       | 19 | FALSE | chr17:7579414:C:T  | 132:chr17:7579414:C:T  | 0.003082 |
| 73_c6-1    | 73  | RET                             | MODERATE           | c.2116G>A                                         | p.Val706Met                                 | 2  | FALSE | chr10:43610164:G:A | 132:chr10:43610164:G:A | 0.002358 |
| 73_c6-1    | 73  | FOXL2;<br>FOXL2NB;<br>LINC01391 | MODERATE; MODIFIER | c.415G>A;<br>c.-132C>T;<br>n.-1G>A                | p.Glu139Lys                                 | 0  | FALSE | chr3:138665150:C:T | 132:chr3:138665150:C:T | 0.005128 |
| 73_c6-1    | 73  | TSC2                            | MODERATE           | c.1654G>A                                         | p.Ala552Thr                                 | 0  | FALSE | chr16:2115574:G:A  | 132:chr16:2115574:G:A  | 0.002732 |
| 73_c6-1    | 73  | NOTCH1                          | MODERATE           | c.3374C>T                                         | p.Ala1125Val                                | 0  | FALSE | chr9:139402543:G:A | 132:chr9:139402543:G:A | 0.00339  |

|         |    |                           |                    |                                                       |                                                                         |   |       |                             |                                 |          |
|---------|----|---------------------------|--------------------|-------------------------------------------------------|-------------------------------------------------------------------------|---|-------|-----------------------------|---------------------------------|----------|
| 73_c6-1 | 73 | TP53                      | MODERATE           | c.421C>T;<br>c.502C>T;<br>c.781C>T;<br>c.898C>T       | p.Pro141Ser<br>;<br>p.Pro168Ser<br>;<br>p.Pro261Ser<br>;<br>p.Pro300Ser | 3 | FALSE | chr17:757<br>7040:G:A       | 132:chr17:<br>7577040:G<br>:A   | 0.002457 |
| 73_c6-1 | 73 | CDKN2B;<br>CDKN2B-<br>AS1 | MODIFIER; MODERATE | c.*199C>T;<br>c.313C>T;<br>n.371+109<br>30G>A         | p.Arg105Trp                                                             | 0 | FALSE | chr9:2200<br>6090:G:A       | 132:chr9:2<br>2006090:G<br>:A   | 0.00363  |
| 73_c6-1 | 73 | C9orf53;<br>CDKN2A        | MODIFIER; MODERATE | n.*616G>A<br>;<br>c.*318C>T;<br>c.*39C>T;<br>c.395C>T | p.Ala132Val                                                             | 1 | FALSE | chr9:2197<br>0963:G:A       | 132:chr9:2<br>1970963:G<br>:A   | 0.003401 |
| 73_c6-1 | 73 | PDGFRA                    | MODERATE           | c.2465G>A                                             | p.Arg822His                                                             | 3 | FALSE | chr4:5515<br>2033:G:A       | 132:chr4:5<br>5152033:G<br>:A   | 0.003793 |
| 73_c6-1 | 73 | ATM                       | MODERATE           | c.7357C>T                                             | p.Arg2453C<br>ys                                                        | 0 | FALSE | chr11:108<br>200990:C:<br>T | 132:chr11:<br>10820099<br>0:C:T | 0.002345 |
| 73_c6-1 | 73 | IGF1R                     | MODERATE           | c.3905T>C;<br>c.3908T>C                               | p.Val1302Al<br>a;<br>p.Val1303Al<br>a                                   | 0 | FALSE | chr15:995<br>00475:T:C      | 132:chr15:<br>99500475:<br>T:C  | 0.002618 |
| 73_c6-1 | 73 | CDH1                      | MODERATE           | c.671G>A                                              | p.Arg224His                                                             | 0 | FALSE | chr16:688<br>42735:G:A      | 132:chr16:<br>68842735:<br>G:A  | 0.002782 |
| 73_c6-1 | 73 | ATM                       | MODERATE           | c.1009C>T                                             | p.Arg337Cys                                                             | 0 | FALSE | chr11:108<br>117798:C:<br>T | 132:chr11:<br>10811779<br>8:C:T | 0.00232  |
| 73_c6-1 | 73 | EPHA3                     | HIGH               | c.2757G>A                                             | p.Trp919*                                                               | 0 | FALSE | chr3:8952<br>1680:G:A       | 132:chr3:8<br>9521680:G<br>:A   | 0.002584 |
| 75_c8-1 | 75 | PIK3R1                    | MODERATE           | c.1226G>A<br>;<br>c.137G>A;<br>c.326G>A;<br>c.416G>A  | p.Arg409Gln<br>;<br>p.Arg46Gln;<br>p.Arg109Gln<br>;<br>p.Arg139Gln      | 1 | FALSE | chr5:6758<br>9238:G:A       | 133:chr5:6<br>7589238:G<br>:A   | 0.0033   |
| 75_c8-1 | 75 | NTRK1                     | MODERATE           | c.1025G>A<br>;<br>c.935G>A                            | p.Arg342Gln<br>;<br>p.Arg312Gln                                         | 3 | FALSE | chr1:1568<br>43599:G:A      | 133:chr1:1<br>56843599:<br>G:A  | 0.001778 |
| 75_c8-1 | 75 | ALK                       | MODERATE           | c.4280C>T                                             | p.Ser1427Ph<br>e                                                        | 2 | FALSE | chr2:2941<br>6673:G:A       | 133:chr2:2<br>9416673:G<br>:A   | 0.002379 |
| 75_c8-1 | 75 | PIK3R1                    | MODERATE           | c.637G>A                                              | p.Val213Ile                                                             | 2 | FALSE | chr5:6757<br>6358:G:A       | 133:chr5:6<br>7576358:G<br>:A   | 0.00199  |
| 75_c8-1 | 75 | PIK3CA                    | MODERATE           | c.1093G>A                                             | p.Glu365Lys                                                             | 6 | FALSE | chr3:1789<br>22324:G:A      | 133:chr3:1<br>78922324:<br>G:A  | 0.002183 |



|         |    |       |                    |                                                |                                             |    |       |                    |                        |          |
|---------|----|-------|--------------------|------------------------------------------------|---------------------------------------------|----|-------|--------------------|------------------------|----------|
| 75_c8-1 | 75 | IGF1R | MODERATE           | c.3905T>C;<br>c.3908T>C                        | p.Val1302Ala;<br>p.Val1303Ala               | 0  | FALSE | chr15:99500475:T:C | 133:chr15:99500475:T:C | 0.003021 |
| 75_c8-1 | 75 | FLT3  | MODERATE           | c.2672G>A                                      | p.Gly891Asp                                 | 0  | FALSE | chr13:28589375:C:T | 133:chr13:28589375:C:T | 0.002116 |
| 75_c8-1 | 75 | PTEN  | MODERATE           | c.815A>C                                       | p.His272Pro                                 | 2  | FALSE | chr10:89720664:A:C | 133:chr10:89720664:A:C | 0.00277  |
| 75_c8-1 | 75 | TP53  | MODIFIER; MODERATE | c.-66G>A;<br>c.16G>A;<br>c.295G>A;<br>c.412G>A | ; p.Ala6Thr;<br>p.Ala99Thr;<br>p.Ala138Thr  | 17 | FALSE | chr17:7578518:C:T  | 133:chr17:7578518:C:T  | 0.001786 |
| 75_c8-1 | 75 | DDR2  | MODERATE           | c.1624G>A                                      | p.Ala542Thr                                 | 1  | FALSE | chr1:162741933:G:A | 133:chr1:162741933:G:A | 0.00188  |
| 75_c8-1 | 75 | NTRK1 | MODERATE           | c.1129G>A;<br>c.1219G>A;<br>c.1237G>A          | p.Glu377Lys;<br>p.Glu407Lys;<br>p.Glu413Lys | 1  | FALSE | chr1:156844404:G:A | 133:chr1:156844404:G:A | 0.001963 |
| 75_c8-1 | 75 | TSC1  | MODERATE           | c.700T>G;<br>c.853T>G                          | p.Phe234Val;<br>p.Phe285Val                 | 0  | FALSE | chr9:135787729:A:C | 133:chr9:135787729:A:C | 0.001789 |
| 75_c8-1 | 75 | FGFR4 | MODIFIER; MODERATE | c.1098-65G>A;<br>c.1251+10G>A;<br>c.1067G>A    | ; p.Arg356His                               | 1  | FALSE | chr5:176520342:G:A | 133:chr5:176520342:G:A | 0.00363  |
| 75_c8-1 | 75 | KDR   | MODERATE           | c.2003C>T                                      | p.Thr668Met                                 | 1  | FALSE | chr4:55968660:G:A  | 133:chr4:55968660:G:A  | 0.002491 |
| 75_c8-1 | 75 | NF1   | MODERATE           | c.4463G>A;<br>c.4526G>A                        | p.Arg1488His;<br>p.Arg1509His               | 1  | FALSE | chr17:29587482:G:A | 133:chr17:29587482:G:A | 0.001972 |
| 75_c8-1 | 75 | FGFR3 | MODIFIER; MODERATE | c.930+919G>A; c.931-748G>A;<br>c.961G>A        | p.Val321Met                                 | 1  | FALSE | chr4:1804671:G:A   | 133:chr4:1804671:G:A   | 0.002994 |
| 75_c8-1 | 75 | FGFR3 | MODERATE           | c.1162G>A;<br>c.1498G>A;<br>c.1504G>A          | p.Ala388Thr;<br>p.Ala500Thr;<br>p.Ala502Thr | 1  | FALSE | chr4:1807167:G:A   | 133:chr4:1807167:G:A   | 0.002181 |
| 75_c8-1 | 75 | FGFR4 | MODERATE           | c.1274G>A;<br>c.1358G>A;<br>c.1478G>A          | p.Arg425Gln;<br>p.Arg453Gln;<br>p.Arg493Gln | 2  | FALSE | chr5:176520735:G:A | 133:chr5:176520735:G:A | 0.001791 |

|         |    |                    |                    |                                                      |                                                          |    |       |                        |                                |          |
|---------|----|--------------------|--------------------|------------------------------------------------------|----------------------------------------------------------|----|-------|------------------------|--------------------------------|----------|
| 75_c8-1 | 75 | ERBB2              | MODERATE; MODIFIER | c.560G>A;<br>c.605G>A;<br>c.650G>A;<br>n.974G>A      | p.Arg187His<br>;<br>p.Arg202His<br>;<br>p.Arg217His<br>; | 1  | FALSE | chr17:378<br>66345:G:A | 133:chr17:<br>37866345:<br>G:A | 0.00283  |
| 75_c8-1 | 75 | HOXD-AS2;<br>HOXD8 | MODIFIER; MODERATE | n.*692C>T<br>;<br>c.304G>A;<br>c.853G>A;<br>c.856G>A | p.Glu102Lys<br>;<br>p.Glu285Lys<br>;<br>p.Glu286Lys      | 0  | FALSE | chr2:1769<br>96323:G:A | 133:chr2:1<br>76996323:<br>G:A | 0.001833 |
| 75_c8-1 | 75 | KRAS               | MODERATE           | c.101C>T                                             | p.Pro34Leu                                               | 2  | FALSE | chr12:253<br>98218:G:A | 133:chr12:<br>25398218:<br>G:A | 0.002217 |
| 75_c8-1 | 75 | RET                | MODERATE           | c.2116G>A                                            | p.Val706Me<br>t                                          | 2  | FALSE | chr10:436<br>10164:G:A | 133:chr10:<br>43610164:<br>G:A | 0.001575 |
| 75_c8-1 | 75 | EGFR               | MODERATE           | c.866C>T                                             | p.Ala289Val                                              | 34 | FALSE | chr7:5522<br>1822:C:T  | 133:chr7:5<br>5221822:C<br>:T  | 0.00194  |
| 75_c8-1 | 75 | CDH1               | HIGH               | c.1596G>A                                            | p.Trp532*                                                | 0  | FALSE | chr16:688<br>53213:G:A | 133:chr16:<br>68853213:<br>G:A | 0.002079 |
| 75_c8-1 | 75 | FBXW7              | MODERATE           | c.1196G>A<br>;<br>c.1310G>A<br>;<br>c.1550G>A        | p.Gly399Glu<br>;<br>p.Gly437Glu<br>;<br>p.Gly517Glu      | 0  | FALSE | chr4:1532<br>47252:C:T | 133:chr4:1<br>53247252:<br>C:T | 0.001795 |
| 75_c8-1 | 75 | VHL                | MODIFIER; MODERATE | c.341-<br>3184G>A;<br>c.430G>A                       | p.Gly144Arg                                              | 0  | FALSE | chr3:1018<br>8287:G:A  | 133:chr3:1<br>0188287:G<br>:A  | 0.002413 |
| 75_c8-1 | 75 | EGFR;<br>EGFR-AS1  | MODERATE; MODIFIER | c.2305G>A<br>;<br>n.1257C>T                          | p.Val769Me<br>t                                          | 3  | FALSE | chr7:5524<br>9007:G:A  | 133:chr7:5<br>5249007:G<br>:A  | 0.001685 |
| 75_c8-1 | 75 | NTRK1              | MODERATE           | c.804C>G;<br>c.894C>G                                | p.His268Gln<br>;<br>p.His298Gln                          | 1  | FALSE | chr1:1568<br>43468:C:G | 133:chr1:1<br>56843468:<br>C:G | 0.002296 |
| 75_c8-1 | 75 | KIT                | MODERATE           | c.154G>A                                             | p.Asp52Asn                                               | 7  | FALSE | chr4:5556<br>1764:G:A  | 133:chr4:5<br>5561764:G<br>:A  | 0.002742 |
| 75_c8-1 | 75 | EPHA3              | MODERATE           | c.1280C>T                                            | p.Ala427Val                                              | 0  | FALSE | chr3:8939<br>1214:C:T  | 133:chr3:8<br>9391214:C<br>:T  | 0.002077 |
| 75_c8-1 | 75 | INSRR;<br>NTRK1    | MODIFIER; MODERATE | c.3397+13<br>C>T;<br>c.28G>A                         | p.Ala10Thr                                               | 1  | FALSE | chr1:1568<br>11891:G:A | 133:chr1:1<br>56811891:<br>G:A | 0.0016   |
| 75_c8-1 | 75 | NTRK3              | MODIFIER; MODERATE | c.1205-<br>1502C>T;<br>c.1211C>T                     | p.Thr404Me<br>t                                          | 0  | FALSE | chr15:886<br>71959:G:A | 133:chr15:<br>88671959:<br>G:A | 0.002081 |

|          |    |                             |                    |                                                                                       |                                                 |       |       |                    |                        |          |
|----------|----|-----------------------------|--------------------|---------------------------------------------------------------------------------------|-------------------------------------------------|-------|-------|--------------------|------------------------|----------|
| 75_c8-1  | 75 | NF1                         | MODERATE           | c.5420G>A;<br>; c.5483G>A                                                             | p.Arg1807Gln;<br>; p.Arg1828Gln                 | 2     | FALSE | chr17:29654731:G:A | 133:chr17:29654731:G:A | 0.001815 |
| 75_c8-1  | 75 | NTHL1;<br>TSC2              | MODIFIER; MODERATE | c.-20C>T;<br>c.170G>A                                                                 | ; p.Arg57His                                    | 0     | FALSE | chr16:2100432:G:A  | 133:chr16:2100432:G:A  | 0.002099 |
| 75_c8-1  | 75 | IDH2;<br>ZNF710             | MODERATE; MODIFIER | c.1108G>A;<br>; c.718G>A;<br>c.952G>A;<br>c.*2147C>T                                  | p.Ala370Thr;<br>; p.Ala240Thr;<br>; p.Ala318Thr | 1     | FALSE | chr15:90628303:C:T | 133:chr15:90628303:C:T | 0.002339 |
| 75_c8-1  | 75 | TSC2                        | MODERATE           | c.3032G>A;<br>; c.3164G>A                                                             | p.Gly1011Asp;<br>; p.Gly1055Asp                 | 0     | FALSE | chr16:2129309:G:A  | 133:chr16:2129309:G:A  | 0.002083 |
| 75_c8-1  | 75 | NOTCH1                      | MODERATE           | c.4901C>T                                                                             | p.Ala1634Val                                    | 0     | FALSE | chr9:139399242:G:A | 133:chr9:139399242:G:A | 0.002535 |
| 75_c8-1  | 75 | NOTCH1                      | LOW                | c.4587C>T                                                                             | p.Asn1529Asn                                    | 0     | FALSE | chr9:139399556:G:A | 133:chr9:139399556:G:A | 0.004016 |
| 75_c8-1  | 75 | NOTCH1                      | MODERATE           | c.2644G>A                                                                             | p.Ala882Thr                                     | 0     | FALSE | chr9:139405201:C:T | 133:chr9:139405201:C:T | 0.00271  |
| 75_c8-1  | 75 | FBXW7                       | HIGH               | c.1177C>T;<br>c.823C>T;<br>c.937C>T                                                   | p.Arg393*;<br>; p.Arg275*;<br>; p.Arg313*       | 0     | FALSE | chr4:153250883:G:A | 133:chr4:153250883:G:A | 0.00216  |
| 75_c8-1  | 75 | ALK                         | MODERATE           | c.871C>T                                                                              | p.Arg291Cys                                     | 3     | FALSE | chr2:29917797:G:A  | 133:chr2:29917797:G:A  | 0.001604 |
| 75_c8-1  | 75 | NTRK2                       | MODERATE           | c.2023C>T;<br>c.2071C>T                                                               | p.Arg675Cys;<br>; p.Arg691Cys                   | 0     | FALSE | chr9:87570331:C:T  | 133:chr9:87570331:C:T  | 0.002002 |
| 78_c11-1 | 78 | IGF1R                       | MODERATE           | c.3121C>T;<br>c.3124C>T                                                               | p.Arg1041Cys;<br>; p.Arg1042Cys                 | 0     | FALSE | chr15:99478220:C:T | 134:chr15:99478220:C:T | 0.003231 |
| 78_c11-1 | 78 | ERBB2;<br>MIEN1;<br>MIR4728 | MODERATE; MODIFIER | c.2236G>A;<br>; c.2281G>A;<br>; c.2326G>A;<br>; n.2650G>A;<br>; c.*388C>T;<br>n.-1G>A | p.Gly746Ser;<br>; p.Gly761Ser;<br>; p.Gly776Ser | 5     | FALSE | chr17:37880997:G:A | 134:chr17:37880997:G:A | 0.003604 |
| 78_c11-1 | 78 | BRAF                        | MODERATE           | c.1799T>A                                                                             | p.Val600Glu                                     | 23024 | FALSE | chr7:140453136:A:T | 134:chr7:140453136:A:T | 0.014925 |
| 78_c11-1 | 78 | PDGFRA                      | MODERATE           | c.2942G>A                                                                             | p.Arg981His                                     | 2     | FALSE | chr4:55156541:G:A  | 134:chr4:55156541:G:A  | 0.00409  |

|          |    |                           |                            |                                                                                                    |                                                                         |   |       |                             |                                 |          |
|----------|----|---------------------------|----------------------------|----------------------------------------------------------------------------------------------------|-------------------------------------------------------------------------|---|-------|-----------------------------|---------------------------------|----------|
| 78_c11-1 | 78 | PDGFRA                    | MODERATE                   | c.2692G>A                                                                                          | p.Gly898Ser                                                             | 1 | FALSE | chr4:5515<br>4983:G:A       | 134:chr4:5<br>5154983:G<br>:A   | 0.003333 |
| 78_c11-1 | 78 | FGFR3;<br>LETM1           | MODERATE; MODIFIER         | c.1730C>T;<br>c.2066C>T;<br>c.2072C>T;<br>c.*2517G><br>A                                           | p.Thr577Me<br>t;<br>p.Thr689Me<br>t;<br>p.Thr691Me<br>t;                | 2 | FALSE | chr4:1808<br>308:C:T        | 134:chr4:1<br>808308:C:<br>T    | 0.004535 |
| 78_c11-1 | 78 | ATM                       | MODERATE                   | c.743G>A                                                                                           | p.Arg248Gln                                                             | 0 | FALSE | chr11:108<br>115595:G:<br>A | 134:chr11:<br>10811559<br>5:G:A | 0.003053 |
| 78_c11-1 | 78 | CTNNB1                    | MODERATE                   | c.1702G>A                                                                                          | p.Glu568Lys                                                             | 0 | FALSE | chr3:4127<br>7233:G:A       | 134:chr3:4<br>1277233:G<br>:A   | 0.004608 |
| 78_c11-1 | 78 | MIR1225;<br>PKD1;<br>TSC2 | MODIFIER; MODERATE         | n.*90C>T;<br>c.*13118C<br>>T;<br>c.*13121C<br>>T;<br>c.4906G>A<br>;<br>c.5038G>A<br>;<br>c.5107G>A | p.Val1636M<br>et;<br>p.Val1680M<br>et;<br>p.Val1703M<br>et              | 0 | FALSE | chr16:213<br>8087:G:A       | 134:chr16:<br>2138087:G<br>:A   | 0.004158 |
| 78_c11-1 | 78 | ALK                       | HIGH                       | c.1651C>T                                                                                          | p.Arg551*                                                               | 2 | FALSE | chr2:2951<br>9920:G:A       | 134:chr2:2<br>9519920:G<br>:A   | 0.004283 |
| 78_c11-1 | 78 | TP53                      | MODIFIER; MODERATE         | c.*168A>G<br>;<br>c.*80A>G<br>;<br>c.1061A>G<br>;<br>c.584A>G<br>;<br>c.665A>G<br>;<br>c.944A>G    | p.Gln354Arg<br>;<br>p.Gln195Arg<br>;<br>p.Gln222Arg<br>;<br>p.Gln315Arg | 2 | FALSE | chr17:757<br>3966:T:C       | 134:chr17:<br>7573966:T<br>:C   | 0.003273 |
| 78_c11-1 | 78 | CDH1                      | MODERATE                   | c.1901C>T                                                                                          | p.Ala634Val                                                             | 0 | FALSE | chr16:688<br>56093:C:T      | 134:chr16:<br>68856093:<br>:C:T | 0.003252 |
| 78_c11-1 | 78 | C9orf53;<br>CDKN2A        | MODIFIER; MODERATE;<br>LOW | n.*616C>T<br>;<br>c.*96G>A<br>;<br>c.173G>A<br>;<br>c.216G>A                                       | p.Arg58Gln<br>;<br>p.Pro72Pro                                           | 6 | FALSE | chr9:2197<br>1185:C:T       | 134:chr9:2<br>1971185:C<br>:T   | 0.005464 |
| 78_c11-1 | 78 | NF1                       | MODERATE                   | c.820C>T                                                                                           | p.Leu274Phe                                                             | 1 | FALSE | chr17:295<br>09615:C:T      | 134:chr17:<br>29509615:<br>:C:T | 0.003356 |
| 78_c11-1 | 78 | ATM                       | MODERATE                   | c.6200C>A                                                                                          | p.Ala2067Asp                                                            | 0 | FALSE | chr11:108<br>188101:C:<br>A | 134:chr11:<br>10818810<br>1:C:A | 0.004264 |

|          |    |                |                    |                                                 |                                                                         |     |       |                        |                                |          |
|----------|----|----------------|--------------------|-------------------------------------------------|-------------------------------------------------------------------------|-----|-------|------------------------|--------------------------------|----------|
| 78_c11-1 | 78 | CTNNB1         | HIGH               | c.283C>T                                        | p.Arg95*                                                                | 0   | FALSE | chr3:4126<br>6486:C:T  | 134:chr3:4<br>1266486:C<br>:T  | 0.003509 |
| 78_c11-1 | 78 | TP53           | MODERATE           | c.340C>T;<br>c.421C>T;<br>c.700C>T;<br>c.817C>T | p.Arg114Cys<br>;<br>p.Arg141Cys<br>;<br>p.Arg234Cys<br>;<br>p.Arg273Cys | 601 | FALSE | chr17:757<br>7121:G:A  | 134:chr17:<br>7577121:G<br>:A  | 0.022403 |
| 78_c11-1 | 78 | ALK            | MODERATE           | c.4306C>T                                       | p.Arg1436C<br>ys                                                        | 3   | FALSE | chr2:2941<br>6647:G:A  | 134:chr2:2<br>9416647:G<br>:A  | 0.003096 |
| 78_c11-1 | 78 | RET            | MODERATE           | c.2161C>T                                       | p.Arg721Trp                                                             | 1   | FALSE | chr10:436<br>12056:C:T | 134:chr10:<br>43612056:<br>C:T | 0.003215 |
| 94_c5-1  | 94 | CDKN2A         | MODIFIER; MODERATE | c.194-<br>3567C>T;<br>c.53C>T                   | ; p.Thr18Met                                                            | 1   | FALSE | chr9:2197<br>4774:G:A  | 135:chr9:2<br>1974774:G<br>:A  | 0.001775 |
| 94_c5-1  | 94 | NOTCH1         | MODERATE           | c.3635G>A                                       | p.Gly1212As<br>p                                                        | 0   | FALSE | chr9:1394<br>01765:C:T | 135:chr9:1<br>39401765:<br>C:T | 0.001656 |
| 94_c5-1  | 94 | MET            | MODERATE           | c.1336A>G                                       | p.Ile446Val                                                             | 1   | FALSE | chr7:1163<br>71857:A:G | 135:chr7:1<br>16371857:<br>A:G | 0.002672 |
| 94_c5-1  | 94 | BRAF           | HIGH               | c.1525C>T                                       | p.Arg509*                                                               | 1   | FALSE | chr7:1404<br>76881:G:A | 135:chr7:1<br>40476881:<br>G:A | 0.001723 |
| 94_c5-1  | 94 | GNA11          | MODERATE           | c.1030G>A                                       | p.Val344Me<br>t                                                         | 1   | FALSE | chr19:312<br>1127:G:A  | 135:chr19:<br>3121127:G<br>:A  | 0.001472 |
| 94_c5-1  | 94 | HGF            | MODERATE           | c.767G>A;<br>c.782G>A                           | p.Arg256His<br>;<br>p.Arg261His                                         | 0   | FALSE | chr7:8137<br>2752:C:T  | 135:chr7:8<br>1372752:C<br>:T  | 0.00161  |
| 94_c5-1  | 94 | TP53           | MODIFIER; MODERATE | c.-66G>A;<br>c.16G>A;<br>c.295G>A;<br>c.412G>A  | ; p.Ala6Thr;<br>p.Ala99Thr;<br>p.Ala138Thr                              | 17  | FALSE | chr17:757<br>8518:C:T  | 135:chr17:<br>7578518:C<br>:T  | 0.002135 |
| 94_c5-1  | 94 | KIT            | MODERATE           | c.365G>A                                        | p.Arg122His                                                             | 1   | FALSE | chr4:5556<br>4477:G:A  | 135:chr4:5<br>5564477:G<br>:A  | 0.001603 |
| 94_c5-1  | 94 | ALK            | MODERATE           | c.2002G>A                                       | p.Glu668Lys                                                             | 1   | FALSE | chr2:2949<br>8004:C:T  | 135:chr2:2<br>9498004:C<br>:T  | 0.001727 |
| 94_c5-1  | 94 | DEAR;<br>FBXW7 | MODIFIER; HIGH     | n.105G>A;<br>c.478C>T;<br>c.592C>T;<br>c.832C>T | ; p.Arg160*;<br>p.Arg198*;<br>p.Arg278*                                 | 0   | FALSE | chr4:1532<br>58983:G:A | 135:chr4:1<br>53258983:<br>G:A | 0.00166  |
| 94_c5-1  | 94 | PTEN           | MODERATE           | c.443C>A                                        | p.Ala148Glu                                                             | 1   | FALSE | chr10:896<br>92959:C:A | 135:chr10:<br>89692959:<br>C:A | 0.00173  |

|         |    |                 |                    |                                                                                                                                                                                |                                                                                                                      |    |       |                        |                                |          |
|---------|----|-----------------|--------------------|--------------------------------------------------------------------------------------------------------------------------------------------------------------------------------|----------------------------------------------------------------------------------------------------------------------|----|-------|------------------------|--------------------------------|----------|
| 94_c5-1 | 94 | FGFR4           | MODERATE           | c.1745G>A<br>;<br>c.1829G>A<br>;<br>c.1949G>A                                                                                                                                  | p.Arg582His<br>;<br>p.Arg610His<br>;<br>p.Arg650His                                                                  | 1  | FALSE | chr5:1765<br>23292:G:A | 135:chr5:1<br>76523292:<br>G:A | 0.002809 |
| 94_c5-1 | 94 | FGFR3           | MODERATE           | c.1177G>A<br>;<br>c.1513G>A<br>;<br>c.1519G>A                                                                                                                                  | p.Val393Ile;<br>p.Val505Ile;<br>p.Val507Ile                                                                          | 1  | FALSE | chr4:1807<br>182:G:A   | 135:chr4:1<br>807182:G:<br>A   | 0.00203  |
| 94_c5-1 | 94 | FGFR4           | MODIFIER; MODERATE | c.1098-<br>65G>A;<br>c.1251+10<br>G>A;<br>c.1067G>A                                                                                                                            | p.Arg356His                                                                                                          | 1  | FALSE | chr5:1765<br>20342:G:A | 135:chr5:1<br>76520342:<br>G:A | 0.001306 |
| 94_c5-1 | 94 | DDR2            | MODERATE           | c.404G>A                                                                                                                                                                       | p.Arg135His                                                                                                          | 1  | FALSE | chr1:1627<br>24632:G:A | 135:chr1:1<br>62724632:<br>G:A | 0.00149  |
| 94_c5-1 | 94 | FGFR3           | MODIFIER; MODERATE | c.931-<br>398C>T;<br>c.1172C>T;<br>c.1178C>T                                                                                                                                   | p.Ala391Val;<br>p.Ala393Val                                                                                          | 34 | FALSE | chr4:1806<br>153:C:T   | 135:chr4:1<br>806153:C:<br>T   | 0.001398 |
| 94_c5-1 | 94 | NF1             | HIGH               | c.3826C>T                                                                                                                                                                      | p.Arg1276*                                                                                                           | 4  | FALSE | chr17:295<br>62746:C:T | 135:chr17:<br>29562746:<br>C:T | 0.002433 |
| 94_c5-1 | 94 | FGFR1;<br>LETM2 | MODERATE; MODIFIER | c.1927C>T;<br>c.1933C>T;<br>c.2170C>T;<br>c.2194C>T;<br>c.2200C>T;<br>c.2293C>T;<br>c.*1406G><br>A;<br>c.*1423G><br>A;<br>c.*1553G><br>A;<br>c.*1567G><br>A;<br>c.*1638G><br>A | p.Arg643Trp<br>;<br>p.Arg645Trp<br>;<br>p.Arg724Trp<br>;<br>p.Arg732Trp<br>;<br>p.Arg734Trp<br>;<br>p.Arg765Trp<br>; | 1  | FALSE | chr8:3827<br>1528:G:A  | 135:chr8:3<br>8271528:G<br>:A  | 0.004215 |
| 94_c5-1 | 94 | MET             | HIGH               | c.1639C>T                                                                                                                                                                      | p.Arg547*                                                                                                            | 2  | FALSE | chr7:1163<br>81017:C:T | 135:chr7:1<br>16381017:<br>C:T | 0.001154 |
| 94_c5-1 | 94 | TSC2            | MODERATE           | c.1654G>A                                                                                                                                                                      | p.Ala552Thr                                                                                                          | 0  | FALSE | chr16:211<br>5574:G:A  | 135:chr16:<br>2115574:G<br>:A  | 0.003925 |
| 94_c5-1 | 94 | FGFR3           | MODERATE           | c.905G>A                                                                                                                                                                       | p.Gly302Asp                                                                                                          | 1  | FALSE | chr4:1803<br>727:G:A   | 135:chr4:1<br>803727:G:<br>A   | 0.001242 |

|         |    |                   |                    |                                                     |                                             |   |       |                    |                        |          |
|---------|----|-------------------|--------------------|-----------------------------------------------------|---------------------------------------------|---|-------|--------------------|------------------------|----------|
| 94_c5-1 | 94 | CDH1              | MODERATE           | c.1198G>A                                           | p.Asp400Asn                                 | 0 | FALSE | chr16:68847276:G:A | 135:chr16:68847276:G:A | 0.002169 |
| 94_c5-1 | 94 | NTRK1             | MODERATE           | c.1975C>T;<br>c.2065C>T;<br>c.2083C>T               | p.Pro659Ser;<br>p.Pro689Ser;<br>p.Pro695Ser | 2 | FALSE | chr1:156849827:C:T | 135:chr1:156849827:C:T | 0.001854 |
| 94_c5-1 | 94 | FLT3              | MODERATE           | c.2039C>T                                           | p.Ala680Val                                 | 0 | FALSE | chr13:28602329:G:A | 135:chr13:28602329:G:A | 0.001479 |
| 94_c5-1 | 94 | MET               | HIGH               | c.1619G>A                                           | p.Trp540*                                   | 1 | FALSE | chr7:116380997:G:A | 135:chr7:116380997:G:A | 0.001234 |
| 94_c5-1 | 94 | NTRK3             | MODERATE           | c.581G>A                                            | p.Gly194Asp                                 | 0 | FALSE | chr15:88680676:C:T | 135:chr15:88680676:C:T | 0.001459 |
| 94_c5-1 | 94 | CDH1              | MODERATE           | c.184G>A                                            | p.Gly62Ser                                  | 0 | FALSE | chr16:68835593:G:A | 135:chr16:68835593:G:A | 0.001408 |
| 94_c5-1 | 94 | FBXW7             | MODERATE           | c.1160G>A;<br>c.1274G>A;<br>c.1514G>A               | p.Arg387His;<br>p.Arg425His;<br>p.Arg505His | 0 | FALSE | chr4:153247288:C:T | 135:chr4:153247288:C:T | 0.001982 |
| 94_c5-1 | 94 | PIK3CA            | MODERATE           | c.35G>A                                             | p.Gly12Asp                                  | 5 | FALSE | chr3:178916648:G:A | 135:chr3:178916648:G:A | 0.00133  |
| 94_c5-1 | 94 | TP53              | MODERATE; MODIFIER | c.254G>A;<br>c.371G>A;<br>c.-279G>A;<br>c.-360G>A   | p.Cys85Tyr;<br>p.Cys124Tyr                  | 3 | FALSE | chr17:7579316:C:T  | 135:chr17:7579316:C:T  | 0.001688 |
| 94_c5-1 | 94 | ERBB2             | MODERATE; MODIFIER | c.1042C>T;<br>c.1087C>T;<br>c.1132C>T;<br>n.1456C>T | p.Pro348Ser;<br>p.Pro363Ser;<br>p.Pro378Ser | 1 | FALSE | chr17:37868685:C:T | 135:chr17:37868685:C:T | 0.00105  |
| 94_c5-1 | 94 | IGF1R             | MODERATE           | c.3121C>T;<br>c.3124C>T                             | p.Arg1041Cys;<br>p.Arg1042Cys               | 0 | FALSE | chr15:99478220:C:T | 135:chr15:99478220:C:T | 0.001417 |
| 94_c5-1 | 94 | TSC2              | MODERATE           | c.866C>T                                            | p.Ala289Val                                 | 0 | FALSE | chr16:2108765:C:T  | 135:chr16:2108765:C:T  | 0.001658 |
| 94_c5-1 | 94 | EGFR;<br>EGFR-AS1 | MODERATE; MODIFIER | c.2495G>A;<br>n.-1C>T                               | p.Arg832His                                 | 2 | FALSE | chr7:55259437:G:A  | 135:chr7:55259437:G:A  | 0.001761 |
| 94_c5-1 | 94 | IGF1R             | MODERATE           | c.280G>A                                            | p.Glu94Lys                                  | 0 | FALSE | chr15:99250976:G:A | 135:chr15:99250976:G:A | 0.001288 |
| 94_c5-1 | 94 | NOTCH1            | MODERATE           | c.4828G>A                                           | p.Ala1610Thr                                | 0 | FALSE | chr9:139399315:C:T | 135:chr9:139399315:C:T | 0.001552 |

|         |    |                    |                    |                                                                           |                                                                                                                 |    |       |                        |                                |          |
|---------|----|--------------------|--------------------|---------------------------------------------------------------------------|-----------------------------------------------------------------------------------------------------------------|----|-------|------------------------|--------------------------------|----------|
| 94_c5-1 | 94 | C9orf53;<br>CDKN2A | MODIFIER; MODERATE | n.*616C>T<br>;<br>c.*288G>A<br>; c.*9G>A;<br>c.365G>A                     | p.Gly122Asp                                                                                                     | 4  | FALSE | chr9:2197<br>0993:C:T  | 135:chr9:2<br>1970993:C<br>:T  | 0.001591 |
| 94_c5-1 | 94 | FBXW7              | HIGH               | c.357G>A;<br>c.471G>A;<br>c.711G>A                                        | p.Trp119*;<br>p.Trp157*;<br>p.Trp237*                                                                           | 0  | FALSE | chr4:1532<br>68097:C:T | 135:chr4:1<br>53268097:<br>C:T | 0.003058 |
| 94_c5-1 | 94 | NOTCH1             | MODERATE           | c.5347C>T                                                                 | p.Arg1783Tr<br>p                                                                                                | 0  | FALSE | chr9:1393<br>96761:G:A | 135:chr9:1<br>39396761:<br>G:A | 0.002634 |
| 94_c5-1 | 94 | EGFR               | MODERATE           | c.610G>A                                                                  | p.Glu204Lys                                                                                                     | 1  | FALSE | chr7:5521<br>9037:G:A  | 135:chr7:5<br>5219037:G<br>:A  | 0.001526 |
| 94_c5-1 | 94 | TP53               | MODERATE           | c.145C>T;<br>c.424C>T;<br>c.541C>T;<br>c.64C>T                            | p.Arg49Cys;<br>p.Arg142Cys<br>;<br>p.Arg181Cys<br>; p.Arg22Cys                                                  | 21 | FALSE | chr17:757<br>8389:G:A  | 135:chr17:<br>7578389:G<br>:A  | 0.001327 |
| 94_c5-1 | 94 | IGF1R              | MODERATE           | c.3905T>C;<br>c.3908T>C                                                   | p.Val1302Al<br>a;<br>p.Val1303Al<br>a                                                                           | 0  | FALSE | chr15:995<br>00475:T:C | 135:chr15:<br>99500475:<br>T:C | 0.001397 |
| 94_c5-1 | 94 | FGFR1              | MODERATE           | c.487C>T;<br>c.493C>T;<br>c.736C>T;<br>c.754C>T;<br>c.760C>T;<br>c.853C>T | p.Arg163Trp<br>;<br>p.Arg165Trp<br>;<br>p.Arg246Trp<br>;<br>p.Arg252Trp<br>;<br>p.Arg254Trp<br>;<br>p.Arg285Trp | 1  | FALSE | chr8:3828<br>2203:G:A  | 135:chr8:3<br>8282203:G<br>:A  | 0.001464 |
| 94_c5-1 | 94 | TSC1               | MODERATE           | c.365C>T;<br>c.518C>T                                                     | p.Ala122Val;<br>p.Ala173Val                                                                                     | 0  | FALSE | chr9:1357<br>97351:G:A | 135:chr9:1<br>35797351:<br>G:A | 0.001794 |
| 94_c5-1 | 94 | NTRK2              | MODERATE           | c.407G>A                                                                  | p.Arg136His                                                                                                     | 0  | FALSE | chr9:8732<br>2806:G:A  | 135:chr9:8<br>7322806:G<br>:A  | 0.0018   |
| 94_c5-1 | 94 | AKT3               | HIGH               | c.196C>T                                                                  | p.Arg66*                                                                                                        | 0  | FALSE | chr1:2438<br>28162:G:A | 135:chr1:2<br>43828162:<br>G:A | 0.001595 |



|         |    |                            |                            |                                                                                                                      |                                         |    |       |                             |                                 |          |
|---------|----|----------------------------|----------------------------|----------------------------------------------------------------------------------------------------------------------|-----------------------------------------|----|-------|-----------------------------|---------------------------------|----------|
| 94_c5-1 | 94 | GAPDH;<br>IFFO1;<br>NCAPD2 | MODERATE; MODIFIER         | c.148G>A;<br>c.274G>A;<br>c.*1743C><br>T;<br>c.*1746C><br>T;<br>c.*1770C><br>T;<br>n.*2798C><br>T;<br>c.*4252G><br>A | p.Ala50Thr;<br>p.Ala92Thr;              | 0  | FALSE | chr12:664<br>6123:G:A       | 135:chr12:<br>6646123:G<br>:A   | 0.002274 |
| 94_c5-1 | 94 | NTRK2                      | MODERATE                   | c.2024G>A<br>;<br>c.2072G>A                                                                                          | p.Arg675His<br>;<br>p.Arg691His         | 0  | FALSE | chr9:8757<br>0332:G:A       | 135:chr9:8<br>7570332:G<br>:A   | 0.001453 |
| 94_c5-1 | 94 | MIR4673;<br>NOTCH1         | MODIFIER; MODERATE         | n.-1G>A;<br>c.203G>A                                                                                                 | ; p.Cys68Tyr                            | 0  | FALSE | chr9:1394<br>18369:C:T      | 135:chr9:1<br>39418369:<br>C:T  | 0.001883 |
| 94_c5-1 | 94 | NOTCH1                     | MODERATE                   | c.2300C>T                                                                                                            | p.Thr767Ile                             | 0  | FALSE | chr9:1394<br>07897:G:A      | 135:chr9:1<br>39407897:<br>G:A  | 0.001688 |
| 94_c5-1 | 94 | TP53                       | MODIFIER; HIGH             | c.-55C>A;<br>c.27C>A;<br>c.306C>A;<br>c.423C>A                                                                       | ; p.Cys9*;<br>p.Cys102*;<br>p.Cys141*   | 13 | FALSE | chr17:757<br>8507:G:T       | 135:chr17:<br>7578507:G<br>:T   | 0.104372 |
| 94_c5-1 | 94 | AKT1                       | MODERATE                   | c.286C>T                                                                                                             | p.Arg96Trp                              | 1  | FALSE | chr14:105<br>242997:G:<br>A | 135:chr14:<br>10524299<br>7:G:A | 0.002591 |
| 94_c5-1 | 94 | PTEN                       | HIGH                       | c.822G>A                                                                                                             | p.Trp274*                               | 3  | FALSE | chr10:897<br>20671:G:A      | 135:chr10:<br>89720671:<br>G:A  | 0.004344 |
| 94_c5-1 | 94 | C9orf53;<br>CDKN2A         | MODIFIER; MODERATE;<br>LOW | n.*616G>A<br>;<br>c.*180C>T;<br>c.257C>T;<br>c.300C>T                                                                | ; p.Ala86Val;<br>p.Cys100Cys            | 1  | FALSE | chr9:2197<br>1101:G:A       | 135:chr9:2<br>1971101:G<br>:A   | 0.001634 |
| 94_c5-1 | 94 | ERBB2                      | MODIFIER; HIGH             | n.1375C>T<br>;<br>c.1006C>T;<br>c.1051C>T;<br>c.961C>T                                                               | ; p.Arg336*;<br>p.Arg351*;<br>p.Arg321* | 1  | FALSE | chr17:378<br>68604:C:T      | 135:chr17:<br>37868604:<br>C:T  | 0.001433 |
| 94_c5-1 | 94 | C9orf53;<br>CDKN2A         | MODIFIER; MODERATE         | n.*616G>A<br>;<br>c.*242C>T;<br>c.319C>T;<br>c.362C>T                                                                | ; p.Arg107Cys<br>;<br>p.Ala121Val       | 1  | FALSE | chr9:2197<br>1039:G:A       | 135:chr9:2<br>1971039:G<br>:A   | 0.001575 |
| 94_c5-1 | 94 | DDR2                       | MODERATE                   | c.1418G>A                                                                                                            | p.Arg473His                             | 2  | FALSE | chr1:1627<br>40216:G:A      | 135:chr1:1<br>62740216:<br>G:A  | 0.002646 |

|         |    |                             |                    |                                                                                                                      |                                                                         |   |       |                        |                                |          |
|---------|----|-----------------------------|--------------------|----------------------------------------------------------------------------------------------------------------------|-------------------------------------------------------------------------|---|-------|------------------------|--------------------------------|----------|
| 94_c5-1 | 94 | ERBB2                       | MODERATE; MODIFIER | c.1180G>A<br>;<br>c.1225G>A<br>;<br>c.1270G>A<br>;<br>n.1594G>A                                                      | p.Val394Ile;<br>p.Val409Ile;<br>p.Val424Ile;                            | 1 | FALSE | chr17:378<br>71746:G:A | 135:chr17:<br>37871746:<br>G:A | 0.000983 |
| 94_c5-1 | 94 | NTRK2                       | MODERATE           | c.1960C>A<br>;<br>c.2008C>A                                                                                          | p.Leu654Met;<br>p.Leu670Met                                             | 0 | FALSE | chr9:8757<br>0268:C:A  | 135:chr9:8<br>7570268:C<br>:A  | 0.001609 |
| 94_c5-1 | 94 | ERBB2;<br>MIEN1;<br>MIR4728 | MODIFIER; MODERATE | c.3160-<br>319G>A;<br>c.3145G>A<br>;<br>c.3190G>A<br>;<br>c.3235G>A<br>;<br>n.3559G>A<br>;<br>c.*388C>T;<br>n.*67G>A | p.Glu1049Lys;<br>p.Glu1064Lys;<br>p.Glu1079Lys                          | 1 | FALSE | chr17:378<br>83623:G:A | 135:chr17:<br>37883623:<br>G:A | 0.001361 |
| 94_c5-1 | 94 | C9orf53;<br>CDKN2A          | MODIFIER; MODERATE | n.*616C>T<br>;<br>c.*350G>A<br>;<br>c.*71G>A;<br>c.427G>A                                                            | p.Ala143Thr                                                             | 1 | FALSE | chr9:2197<br>0931:C:T  | 135:chr9:2<br>1970931:C<br>:T  | 0.001581 |
| 94_c5-1 | 94 | FGFR4                       | MODIFIER; MODERATE | c.1058-<br>174G>A;<br>c.1078G>A                                                                                      | p.Ala360Thr                                                             | 1 | FALSE | chr5:1765<br>20159:G:A | 135:chr5:1<br>76520159:<br>G:A | 0.001505 |
| 94_c5-1 | 94 | NTRK1                       | MODERATE           | c.266G>A;<br>c.356G>A                                                                                                | p.Arg89His;<br>p.Arg119His                                              | 1 | FALSE | chr1:1568<br>34588:G:A | 135:chr1:1<br>56834588:<br>G:A | 0.0025   |
| 94_c5-1 | 94 | PIK3R1                      | MODERATE           | c.1694G>A<br>;<br>c.605G>A;<br>c.794G>A;<br>c.884G>A                                                                 | p.Ser565Asn<br>;<br>p.Ser202Asn<br>;<br>p.Ser265Asn<br>;<br>p.Ser295Asn | 1 | FALSE | chr5:6759<br>1101:G:A  | 135:chr5:6<br>7591101:G<br>:A  | 0.00161  |
| 94_c5-1 | 94 | ERBB2;<br>MIEN1;<br>MIR4728 | MODERATE; MODIFIER | c.2720A>G<br>;<br>c.2765A>G<br>;<br>c.2810A>G<br>;<br>n.3134A>G<br>;<br>c.*388T>C;<br>n.-1A>G                        | p.Lys907Arg<br>;<br>p.Lys922Arg<br>;<br>p.Lys937Arg                     | 1 | FALSE | chr17:378<br>82044:A:G | 135:chr17:<br>37882044:<br>A:G | 0.002095 |

|         |    |                    |                    |                                                           |                                                          |    |       |                             |                                 |          |
|---------|----|--------------------|--------------------|-----------------------------------------------------------|----------------------------------------------------------|----|-------|-----------------------------|---------------------------------|----------|
| 94_c5-1 | 94 | NTRK1              | MODERATE           | c.415G>A;<br>c.505G>A                                     | p.Gly139Arg<br>; p.Gly169Arg                             | 1  | FALSE | chr1:1568<br>37972:G:A      | 135:chr1:1<br>56837972:<br>G:A  | 0.001405 |
| 94_c5-1 | 94 | C9orf53;<br>CDKN2A | MODIFIER; MODERATE | n.*616C>T<br>;<br>c.*167G>A<br>;<br>c.244G>A;<br>c.287G>A | p.Val82Met;<br>p.Arg96His                                | 3  | FALSE | chr9:2197<br>1114:C:T       | 135:chr9:2<br>1971114:C<br>:T   | 0.001652 |
| 95_c3-1 | 95 | APC                | HIGH               | c.1606C>T;<br>c.1660C>T                                   | p.Arg536*;<br>p.Arg554*                                  | 0  | FALSE | chr5:1121<br>64586:C:T      | 136:chr5:1<br>12164586:<br>C:T  | 0.002162 |
| 95_c3-1 | 95 | TP53               | MODIFIER; MODERATE | c.-26C>G;<br>c.335C>G;<br>c.452C>G;<br>c.56C>G            | p.Pro112Arg<br>;<br>p.Pro151Arg<br>; p.Pro19Arg          | 30 | FALSE | chr17:757<br>8478:G:C       | 136:chr17:<br>7578478:G<br>:C   | 0.002356 |
| 95_c3-1 | 95 | MAP2K1             | MODERATE           | c.140G>A                                                  | p.Arg47Gln                                               | 4  | FALSE | chr15:667<br>27424:G:A      | 136:chr15:<br>66727424:<br>G:A  | 0.002111 |
| 95_c3-1 | 95 | EGFR               | MODERATE           | c.442G>A                                                  | p.Val148Me<br>t                                          | 1  | FALSE | chr7:5521<br>4316:G:A       | 136:chr7:5<br>5214316:G<br>:A   | 0.002466 |
| 95_c3-1 | 95 | PIK3CA             | MODERATE           | c.1483C>T                                                 | p.His495Tyr                                              | 1  | FALSE | chr3:1789<br>28297:C:T      | 136:chr3:1<br>78928297:<br>C:T  | 0.001921 |
| 95_c3-1 | 95 | ERBB2              | MODERATE; MODIFIER | c.1594C>T;<br>c.1639C>T;<br>c.1684C>T;<br>n.2008C>T       | p.Pro532Ser<br>;<br>p.Pro547Ser<br>;<br>p.Pro562Ser<br>; | 1  | FALSE | chr17:378<br>72805:C:T      | 136:chr17:<br>37872805:<br>C:T  | 0.001901 |
| 95_c3-1 | 95 | AKT1               | MODERATE           | c.1108C>T                                                 | p.Arg370Cys                                              | 1  | FALSE | chr14:105<br>239279:G:<br>A | 136:chr14:<br>10523927<br>9:G:A | 0.002398 |
| 95_c3-1 | 95 | MET                | MODERATE           | c.142G>A                                                  | p.Ala48Thr                                               | 1  | FALSE | chr7:1163<br>39280:G:A      | 136:chr7:1<br>16339280:<br>G:A  | 0.001584 |
| 95_c3-1 | 95 | STK11              | MODERATE           | c.488G>A                                                  | p.Gly163Asp                                              | 1  | FALSE | chr19:122<br>0395:G:A       | 136:chr19:<br>1220395:G<br>:A   | 0.004283 |
| 95_c3-1 | 95 | CTNNB1             | MODERATE           | c.1346G>A                                                 | p.Arg449His                                              | 0  | FALSE | chr3:4127<br>5180:G:A       | 136:chr3:4<br>1275180:G<br>:A   | 0.001554 |
| 95_c3-1 | 95 | FGFR1              | MODIFIER; MODERATE | c.-34C>T;<br>c.158C>T;<br>c.59C>T                         | p.Thr53Ile;<br>p.Thr20Ile                                | 1  | FALSE | chr8:3831<br>4906:G:A       | 136:chr8:3<br>8314906:G<br>:A   | 0.001967 |
| 95_c3-1 | 95 | EPHA3              | MODERATE           | c.1556C>T                                                 | p.Thr519Me<br>t                                          | 0  | FALSE | chr3:8944<br>8592:C:T       | 136:chr3:8<br>9448592:C<br>:T   | 0.002375 |

|         |    |        |                    |                                                                                                                 |                                                                                                                 |     |       |                             |                                 |          |
|---------|----|--------|--------------------|-----------------------------------------------------------------------------------------------------------------|-----------------------------------------------------------------------------------------------------------------|-----|-------|-----------------------------|---------------------------------|----------|
| 95_c3-1 | 95 | AKT3   | MODERATE           | c.899C>T                                                                                                        | p.Ala300Val                                                                                                     | 0   | FALSE | chr1:2437<br>27071:G:A      | 136:chr1:2<br>43727071:<br>G:A  | 0.001923 |
| 95_c3-1 | 95 | TP53   | HIGH               | c.439C>T;<br>c.520C>T;<br>c.799C>T;<br>c.916C>T                                                                 | p.Arg147*;<br>p.Arg174*;<br>p.Arg267*;<br>p.Arg306*                                                             | 167 | FALSE | chr17:757<br>7022:G:A       | 136:chr17:<br>7577022:G<br>:A   | 0.002112 |
| 95_c3-1 | 95 | NTRK2  | MODERATE           | c.2023C>T;<br>c.2071C>T                                                                                         | p.Arg675Cys<br>;<br>p.Arg691Cys                                                                                 | 0   | FALSE | chr9:8757<br>0331:C:T       | 136:chr9:8<br>7570331:C<br>:T   | 0.002304 |
| 95_c3-1 | 95 | NTRK1  | MODERATE           | c.1837C>T;<br>c.1927C>T;<br>c.1945C>T                                                                           | p.Arg613Trp<br>;<br>p.Arg643Trp<br>;<br>p.Arg649Trp                                                             | 3   | FALSE | chr1:1568<br>49053:C:T      | 136:chr1:1<br>56849053:<br>C:T  | 0.002528 |
| 95_c3-1 | 95 | PDGFRA | MODERATE           | c.577G>A                                                                                                        | p.Val193Ile                                                                                                     | 2   | FALSE | chr4:5513<br>0043:G:A       | 136:chr4:5<br>5130043:G<br>:A   | 0.001661 |
| 95_c3-1 | 95 | AKT1   | MODERATE           | c.932G>A                                                                                                        | p.Gly311Asp                                                                                                     | 1   | FALSE | chr14:105<br>239613:C:<br>T | 136:chr14:<br>10523961<br>3:C:T | 0.002915 |
| 95_c3-1 | 95 | DDR2   | MODERATE           | c.1418G>A                                                                                                       | p.Arg473His                                                                                                     | 2   | FALSE | chr1:1627<br>40216:G:A      | 136:chr1:1<br>62740216:<br>G:A  | 0.001761 |
| 95_c3-1 | 95 | TP53   | MODERATE; MODIFIER | c.134C>T;<br>c.251C>T;<br>c.-279C>T;<br>c.-360C>T                                                               | p.Ala45Val;<br>p.Ala84Val;                                                                                      | 4   | FALSE | chr17:757<br>9436:G:A       | 136:chr17:<br>7579436:G<br>:A   | 0.002829 |
| 95_c3-1 | 95 | EGFR   | MODERATE           | c.940G>A                                                                                                        | p.Asp314As<br>n                                                                                                 | 1   | FALSE | chr7:5522<br>3573:G:A       | 136:chr7:5<br>5223573:G<br>:A   | 0.001946 |
| 95_c3-1 | 95 | NF1    | MODERATE           | c.4321C>T;<br>c.4384C>T                                                                                         | p.Arg1441Tr<br>p;<br>p.Arg1462Tr<br>p                                                                           | 1   | FALSE | chr17:295<br>86101:C:T      | 136:chr17:<br>29586101:<br>C:T  | 0.001838 |
| 95_c3-1 | 95 | ATM    | HIGH               | c.6100C>T                                                                                                       | p.Arg2034*                                                                                                      | 0   | FALSE | chr11:108<br>186742:C:<br>T | 136:chr11:<br>10818674<br>2:C:T | 0.001637 |
| 95_c3-1 | 95 | FGFR2  | MODIFIER; MODERATE | c.939+481<br>3C>T;<br>c.1238C>T;<br>c.1241C>T;<br>c.893C>T;<br>c.902C>T;<br>c.971C>T;<br>c.974C>T;<br>n.1688C>T | p.Pro413Leu<br>;<br>p.Pro414Leu<br>;<br>p.Pro298Leu<br>;<br>p.Pro301Leu<br>;<br>p.Pro324Leu<br>;<br>p.Pro325Leu | 1   | FALSE | chr10:123<br>274680:G:<br>A | 136:chr10:<br>12327468<br>0:G:A | 0.003026 |

|         |    |                   |                    |                                                   |                                                                         |       |       |                             |                                 |          |
|---------|----|-------------------|--------------------|---------------------------------------------------|-------------------------------------------------------------------------|-------|-------|-----------------------------|---------------------------------|----------|
| 95_c3-1 | 95 | TP53              | MODERATE           | c.421C>T;<br>c.502C>T;<br>c.781C>T;<br>c.898C>T   | p.Pro141Ser<br>;<br>p.Pro168Ser<br>;<br>p.Pro261Ser<br>;<br>p.Pro300Ser | 3     | FALSE | chr17:757<br>7040:G:A       | 136:chr17:<br>7577040:G<br>:A   | 0.00209  |
| 95_c3-1 | 95 | MET               | HIGH               | c.1639C>T                                         | p.Arg547*                                                               | 2     | FALSE | chr7:1163<br>81017:C:T      | 136:chr7:1<br>16381017:<br>C:T  | 0.001566 |
| 95_c3-1 | 95 | TP53              | HIGH               | c.178C>T;<br>c.457C>T;<br>c.574C>T;<br>c.97C>T    | p.Gln60*;<br>p.Gln153*;<br>p.Gln192*;<br>p.Gln33*                       | 88    | FALSE | chr17:757<br>8275:G:A       | 136:chr17:<br>7578275:G<br>:A   | 0.001974 |
| 95_c3-1 | 95 | PDGFRA            | MODERATE           | c.2942G>A                                         | p.Arg981His                                                             | 2     | FALSE | chr4:5515<br>6541:G:A       | 136:chr4:5<br>5156541:G<br>:A   | 0.002985 |
| 95_c3-1 | 95 | KIT               | MODERATE           | c.1493G>A                                         | p.Gly498Asp                                                             | 1     | FALSE | chr4:5559<br>2169:G:A       | 136:chr4:5<br>5592169:G<br>:A   | 0.002212 |
| 95_c3-1 | 95 | FBXW7             | MODERATE           | c.1088C>T;<br>c.1202C>T;<br>c.1442C>T             | p.Ala363Val;<br>p.Ala401Val;<br>p.Ala481Val                             | 0     | FALSE | chr4:1532<br>47360:G:A      | 136:chr4:1<br>53247360:<br>G:A  | 0.003247 |
| 95_c3-1 | 95 | EGFR;<br>EGFR-AS1 | MODERATE; MODIFIER | c.2575G>A<br>; n.-1C>T                            | p.Ala859Thr<br>;                                                        | 4     | FALSE | chr7:5525<br>9517:G:A       | 136:chr7:5<br>5259517:G<br>:A   | 0.0022   |
| 95_c3-1 | 95 | BRAF              | HIGH               | c.532C>T                                          | p.Arg178*                                                               | 1     | FALSE | chr7:1405<br>08768:G:A      | 136:chr7:1<br>40508768:<br>G:A  | 0.001818 |
| 95_c3-1 | 95 | ATM               | MODERATE           | c.2944C>T                                         | p.Arg982Cys                                                             | 0     | FALSE | chr11:108<br>142000:C:<br>T | 136:chr11:<br>10814200<br>0:C:T | 0.001431 |
| 95_c3-1 | 95 | NTRK1             | MODERATE           | c.1669C>T;<br>c.1759C>T;<br>c.1777C>T             | p.Arg557Trp<br>;<br>p.Arg587Trp<br>;<br>p.Arg593Trp                     | 1     | FALSE | chr1:1568<br>46336:C:T      | 136:chr1:1<br>56846336:<br>C:T  | 0.002488 |
| 95_c3-1 | 95 | TP53              | MODERATE; MODIFIER | c.170C>T;<br>c.287C>T;<br>c.-279C>T;<br>c.-360C>T | p.Ser57Phe;<br>p.Ser96Phe;                                              | 3     | FALSE | chr17:757<br>9400:G:A       | 136:chr17:<br>7579400:G<br>:A   | 0.002937 |
| 95_c3-1 | 95 | KRAS              | MODERATE           | c.35G>C                                           | p.Gly12Ala                                                              | 11213 | FALSE | chr12:253<br>98284:C:G      | 136:chr12:<br>25398284:<br>C:G  | 0.014359 |

|         |    |                             |                    |                                                                               |                                             |    |       |                     |                         |          |
|---------|----|-----------------------------|--------------------|-------------------------------------------------------------------------------|---------------------------------------------|----|-------|---------------------|-------------------------|----------|
| 94_c4-1 | 94 | FGFR2                       | MODIFIER; MODERATE | c.110-14066G>A;<br>c.110-946G>A;<br>n.757-14066G>A;<br>c.289G>A               | ; p.Ala97Thr                                | 1  | FALSE | chr10:123325039:C:T | 137:chr10:123325039:C:T | 0.002198 |
| 94_c4-1 | 94 | NTRK1                       | MODERATE           | c.1940T>G;<br>c.2030T>G;<br>c.2048T>G                                         | p.Val647Gly;<br>p.Val677Gly;<br>p.Val683Gly | 2  | FALSE | chr1:156849792:T:G  | 137:chr1:156849792:T:G  | 0.019139 |
| 94_c4-1 | 94 | TP53                        | MODIFIER; HIGH     | c.-55C>A;<br>c.27C>A;<br>c.306C>A;<br>c.423C>A                                | ; p.Cys9*;<br>p.Cys102*;<br>p.Cys141*       | 13 | FALSE | chr17:7578507:G:T   | 137:chr17:7578507:G:T   | 0.202358 |
| 94_c4-1 | 94 | EGFR                        | MODERATE           | c.1774G>A                                                                     | p.Val592Ile                                 | 1  | FALSE | chr7:55233024:G:A   | 137:chr7:55233024:G:A   | 0.002469 |
| 94_c4-1 | 94 | MET                         | MODERATE           | c.487T>C                                                                      | p.Ser163Pro                                 | 1  | FALSE | chr7:116339625:T:C  | 137:chr7:116339625:T:C  | 0.00273  |
| 94_c4-1 | 94 | CDKN2A                      | MODIFIER; MODERATE | c.194-3568A>C;<br>c.52A>C                                                     | ; p.Thr18Pro                                | 1  | FALSE | chr9:21974775:T:G   | 137:chr9:21974775:T:G   | 0.005739 |
| 94_c4-1 | 94 | TSC2                        | MODERATE           | c.3032G>A;<br>c.3164G>A                                                       | p.Gly1011Asp;<br>p.Gly1055Asp               | 0  | FALSE | chr16:2129309:G:A   | 137:chr16:2129309:G:A   | 0.003185 |
| 94_c4-1 | 94 | CDH1                        | MODERATE           | c.1901C>T                                                                     | p.Ala634Val                                 | 0  | FALSE | chr16:68856093:C:T  | 137:chr16:68856093:C:T  | 0.001835 |
| 94_c4-1 | 94 | C9orf53;<br>CDKN2A          | MODIFIER; MODERATE | n.*616C>T;<br>c.*167G>A;<br>c.244G>A;<br>c.287G>A                             | ; p.Val82Met;<br>p.Arg96His                 | 3  | FALSE | chr9:21971114:C:T   | 137:chr9:21971114:C:T   | 0.00319  |
| 94_c4-1 | 94 | PIK3CA                      | MODERATE           | c.277C>T                                                                      | p.Arg93Trp                                  | 24 | FALSE | chr3:178916890:C:T  | 137:chr3:178916890:C:T  | 0.002755 |
| 94_c4-1 | 94 | ERBB2;<br>MIEN1;<br>MIR4728 | MODERATE; MODIFIER | c.2720A>G;<br>c.2765A>G;<br>c.2810A>G;<br>n.3134A>G;<br>c.*388T>C;<br>n.-1A>G | p.Lys907Arg;<br>p.Lys922Arg;<br>p.Lys937Arg | 1  | FALSE | chr17:37882044:A:G  | 137:chr17:37882044:A:G  | 0.000983 |

|         |    |                    |                            |                                                           |                                                            |     |       |                        |                                |          |
|---------|----|--------------------|----------------------------|-----------------------------------------------------------|------------------------------------------------------------|-----|-------|------------------------|--------------------------------|----------|
| 94_c4-1 | 94 | TP53               | MODERATE                   | c.287T>C;<br>c.368T>C;<br>c.647T>C;<br>c.764T>C           | p.Ile96Thr;<br>p.Ile123Thr;<br>p.Ile216Thr;<br>p.Ile255Thr | 11  | FALSE | chr17:757<br>7517:A:G  | 137:chr17:<br>7577517:A<br>:G  | 0.001907 |
| 94_c4-1 | 94 | EGFR               | MODERATE                   | c.755G>A                                                  | p.Arg252His                                                | 3   | FALSE | chr7:5522<br>1711:G:A  | 137:chr7:5<br>5221711:G<br>:A  | 0.003191 |
| 94_c4-1 | 94 | TP53               | MODERATE; MODIFIER         | c.100G>A;<br>c.217G>A;<br>c.-279G>A;<br>c.-360G>A         | p.Val34Met;<br>p.Val73Met;                                 | 5   | FALSE | chr17:757<br>9470:C:T  | 137:chr17:<br>7579470:C<br>:T  | 0.002395 |
| 94_c4-1 | 94 | NOTCH1             | MODERATE                   | c.4903G>A                                                 | p.Ala1635Thr                                               | 0   | FALSE | chr9:1393<br>99240:C:T | 137:chr9:1<br>39399240:<br>C:T | 0.002743 |
| 94_c4-1 | 94 | TP53               | LOW; MODERATE              | c.1A>C;<br>c.361A>C;<br>c.478A>C;<br>c.82A>C              | p.Met17;<br>p.Met121Leu;<br>p.Met160Leu;<br>p.Met28Leu     | 5   | FALSE | chr17:757<br>8452:T:G  | 137:chr17:<br>7578452:T<br>:G  | 0.003086 |
| 94_c4-1 | 94 | FGFR3              | MODERATE                   | c.905G>A                                                  | p.Gly302Asp                                                | 1   | FALSE | chr4:1803<br>727:G:A   | 137:chr4:1<br>803727:G:<br>A   | 0.001369 |
| 94_c4-1 | 94 | FGFR3              | MODERATE                   | c.742C>T                                                  | p.Arg248Cys                                                | 254 | FALSE | chr4:1803<br>564:C:T   | 137:chr4:1<br>803564:C:<br>T   | 0.002692 |
| 94_c4-1 | 94 | STK11              | MODERATE                   | c.628T>C                                                  | p.Cys210Arg                                                | 1   | FALSE | chr19:122<br>0610:T:C  | 137:chr19:<br>1220610:T<br>:C  | 0.005629 |
| 94_c4-1 | 94 | TP53               | MODIFIER; MODERATE         | c.-66G>A;<br>c.16G>A;<br>c.295G>A;<br>c.412G>A            | p.Ala6Thr;<br>p.Ala99Thr;<br>p.Ala138Thr                   | 17  | FALSE | chr17:757<br>8518:C:T  | 137:chr17:<br>7578518:C<br>:T  | 0.001996 |
| 94_c4-1 | 94 | C9orf53;<br>CDKN2A | MODIFIER; MODERATE;<br>LOW | n.*616G>A<br>;<br>c.*223C>T;<br>c.343C>T;<br>c.300C>T     | p.Arg115Trp<br>;<br>p.Ala100Ala                            | 1   | FALSE | chr9:2197<br>1058:G:A  | 137:chr9:2<br>1971058:G<br>:A  | 0.002825 |
| 94_c4-1 | 94 | EPHA3              | MODERATE                   | c.1280C>T                                                 | p.Ala427Val                                                | 0   | FALSE | chr3:8939<br>1214:C:T  | 137:chr3:8<br>9391214:C<br>:T  | 0.002146 |
| 94_c4-1 | 94 | C9orf53;<br>CDKN2A | MODIFIER; MODERATE;<br>LOW | n.*616T>G<br>;<br>c.*120A>C<br>;<br>c.197A>C;<br>c.240A>C | p.His66Pro;<br>p.Pro80Pro                                  | 1   | FALSE | chr9:2197<br>1161:T:G  | 137:chr9:2<br>1971161:T<br>:G  | 0.04034  |

|         |    |                    |                    |                                                                        |                                                          |   |       |                             |                                 |          |
|---------|----|--------------------|--------------------|------------------------------------------------------------------------|----------------------------------------------------------|---|-------|-----------------------------|---------------------------------|----------|
| 94_c4-1 | 94 | CDH1               | LOW                | c.1137G>A                                                              | p.Thr379Thr                                              | 0 | FALSE | chr16:688<br>46166:G:A      | 137:chr16:<br>68846166:<br>G:A  | 0.00209  |
| 94_c4-1 | 94 | DDR2               | MODERATE           | c.1418G>A                                                              | p.Arg473His                                              | 2 | FALSE | chr1:1627<br>40216:G:A      | 137:chr1:1<br>62740216:<br>G:A  | 0.001601 |
| 94_c4-1 | 94 | IGF1R              | MODERATE           | c.3905T>C;<br>c.3908T>C                                                | p.Val1302Ala;<br>p.Val1303Ala                            | 0 | FALSE | chr15:995<br>00475:T:C      | 137:chr15:<br>99500475:<br>T:C  | 0.00444  |
| 94_c4-1 | 94 | VHL                | MODIFIER; MODERATE | c.341-<br>3270A>C;<br>c.344A>C                                         | ; p.His115Pro                                            | 0 | FALSE | chr3:1018<br>8201:A:C       | 137:chr3:1<br>0188201:A<br>:C   | 0.002584 |
| 94_c4-1 | 94 | FGFR4              | MODERATE; LOW      | c.1186G>A<br>;<br>c.1306G>A<br>;<br>c.1152G>A                          | p.Val396Met;<br>p.Val436Met;<br>p.Ala384Ala              | 1 | FALSE | chr5:1765<br>20461:G:A      | 137:chr5:1<br>76520461:<br>G:A  | 0.003243 |
| 94_c4-1 | 94 | ERBB2              | MODERATE; MODIFIER | c.560G>A;<br>c.605G>A;<br>c.650G>A;<br>n.974G>A                        | p.Arg187His<br>;<br>p.Arg202His<br>;<br>p.Arg217His<br>; | 1 | FALSE | chr17:378<br>66345:G:A      | 137:chr17:<br>37866345:<br>G:A  | 0.001589 |
| 94_c4-1 | 94 | IGF1R              | MODERATE           | c.3005G>A<br>;<br>c.3008G>A                                            | p.Arg1002Gln;<br>p.Arg1003Gln                            | 0 | FALSE | chr15:994<br>78104:G:A      | 137:chr15:<br>99478104:<br>G:A  | 0.002979 |
| 94_c4-1 | 94 | C9orf53;<br>CDKN2A | MODIFIER; MODERATE | n.*616G>A<br>;<br>c.*324C>T;<br>c.*45C>T;<br>c.401C>T                  | ; p.Ala134Val                                            | 1 | FALSE | chr9:2197<br>0957:G:A       | 137:chr9:2<br>1970957:G<br>:A   | 0.002591 |
| 94_c4-1 | 94 | CDH1               | MODERATE           | c.671G>A                                                               | p.Arg224His                                              | 0 | FALSE | chr16:688<br>42735:G:A      | 137:chr16:<br>68842735:<br>G:A  | 0.002237 |
| 94_c4-1 | 94 | NOTCH1             | MODERATE           | c.3859C>T                                                              | p.Arg1287Cys                                             | 0 | FALSE | chr9:1394<br>01210:G:A      | 137:chr9:1<br>39401210:<br>G:A  | 0.002448 |
| 94_c4-1 | 94 | FGFR2              | MODIFIER; MODERATE | c.749-<br>4847G>A;<br>c.407G>A;<br>c.485G>A;<br>c.752G>A;<br>n.1054G>A | ; p.Arg136Gln<br>;<br>p.Arg162Gln<br>;<br>p.Arg251Gln    | 2 | FALSE | chr10:123<br>279680:C:<br>T | 137:chr10:<br>12327968<br>0:C:T | 0.00237  |



|          |     |                             |                    |                                                                                                  |                                                           |   |       |                    |                        |          |
|----------|-----|-----------------------------|--------------------|--------------------------------------------------------------------------------------------------|-----------------------------------------------------------|---|-------|--------------------|------------------------|----------|
| 94_c4-1  | 94  | PKD1;<br>TSC2               | MODIFIER; MODERATE | c.*13118C>T;<br>c.*13121C>T;<br>c.4192G>A;<br>c.4324G>A;<br>c.4393G>A                            | p.Asp1398Asn;<br>p.Asp1442Asn;<br>p.Asp1465Asn            | 0 | FALSE | chr16:2134616:G:A  | 137:chr16:2134616:G:A  | 0.001864 |
| 94_c4-1  | 94  | RET                         | MODERATE           | c.1690A>C                                                                                        | p.Thr564Pro                                               | 1 | FALSE | chr10:43608342:A:C | 137:chr10:43608342:A:C | 0.007543 |
| 94_c4-1  | 94  | TP53                        | MODERATE           | c.196G>T;<br>c.277G>T;<br>c.556G>T;<br>c.673G>T                                                  | p.Val66Phe;<br>p.Val93Phe;<br>p.Val186Phe;<br>p.Val225Phe | 2 | FALSE | chr17:7577608:C:A  | 137:chr17:7577608:C:A  | 0.001783 |
| 94_c4-1  | 94  | ERBB2;<br>MIEN1;<br>MIR4728 | MODIFIER; MODERATE | c.3160-213A>G;<br>c.3251A>G;<br>c.3296A>G;<br>c.3341A>G;<br>n.3665A>G;<br>c.*388T>C;<br>n.*67A>G | p.Glu1084Gly;<br>p.Glu1099Gly;<br>p.Glu1114Gly            | 1 | FALSE | chr17:37883729:A:G | 137:chr17:37883729:A:G | 0.002443 |
| 94_c4-1  | 94  | NTRK1                       | MODERATE           | c.804C>G;<br>c.894C>G                                                                            | p.His268Gln;<br>p.His298Gln                               | 1 | FALSE | chr1:156843468:C:G | 137:chr1:156843468:C:G | 0.003279 |
| 94_c4-1  | 94  | NOTCH1                      | MODERATE           | c.4984C>T                                                                                        | p.Arg1662Trp                                              | 0 | FALSE | chr9:139399159:G:A | 137:chr9:139399159:G:A | 0.003454 |
| 94_c4-1  | 94  | PIK3CA                      | MODERATE           | c.3074C>A                                                                                        | p.Thr1025Asn                                              | 4 | FALSE | chr3:178952019:C:A | 137:chr3:178952019:C:A | 0.001883 |
| 111_bl-1 | 111 | ALK                         | MODERATE           | c.3455T>C                                                                                        | p.Leu1152Pro                                              | 1 | FALSE | chr2:29445270:A:G  | 141:chr2:29445270:A:G  | 0.006814 |
| 111_bl-1 | 111 | BRAF                        | MODERATE           | c.1943A>G                                                                                        | p.Glu648Gly                                               | 1 | FALSE | chr7:140449136:T:C | 141:chr7:140449136:T:C | 0.003361 |
| 111_bl-1 | 111 | MET                         | MODERATE           | c.487T>C                                                                                         | p.Ser163Pro                                               | 1 | FALSE | chr7:116339625:T:C | 141:chr7:116339625:T:C | 0.00274  |
| 111_bl-1 | 111 | RET                         | MODERATE           | c.1690A>C                                                                                        | p.Thr564Pro                                               | 1 | FALSE | chr10:43608342:A:C | 141:chr10:43608342:A:C | 0.013783 |
| 111_bl-1 | 111 | CDKN2A                      | MODIFIER; MODERATE | c.194-3568A>C;<br>c.52A>C                                                                        | p.Thr18Pro                                                | 1 | FALSE | chr9:21974775:T:G  | 141:chr9:21974775:T:G  | 0.011521 |

|          |     |       |                    |                                                 |                                                          |     |       |                     |                         |          |
|----------|-----|-------|--------------------|-------------------------------------------------|----------------------------------------------------------|-----|-------|---------------------|-------------------------|----------|
| 111_bl-1 | 111 | STK11 | MODERATE           | c.488G>A                                        | p.Gly163Asp                                              | 1   | FALSE | chr19:1220395:G:A   | 141:chr19:1220395:G:A   | 0.005764 |
| 111_bl-1 | 111 | VHL   | MODIFIER; MODERATE | c.341-3270A>C;<br>c.344A>C                      | ; p.His115Pro                                            | 0   | FALSE | chr3:10188201:A:C   | 141:chr3:10188201:A:C   | 0.007117 |
| 111_bl-1 | 111 | AKT1  | MODERATE           | c.932G>A                                        | p.Gly311Asp                                              | 1   | FALSE | chr14:105239613:C:T | 141:chr14:105239613:C:T | 0.003697 |
| 111_bl-1 | 111 | DDR2  | MODERATE           | c.1418G>A                                       | p.Arg473His                                              | 2   | FALSE | chr1:162740216:G:A  | 141:chr1:162740216:G:A  | 0.002525 |
| 111_bl-1 | 111 | KDR   | MODERATE           | c.1028C>T                                       | p.Thr343Met                                              | 3   | FALSE | chr4:55976884:G:A   | 141:chr4:55976884:G:A   | 0.004084 |
| 71_c6-2  | 71  | TP53  | MODERATE           | c.202T>C;<br>c.283T>C;<br>c.562T>C;<br>c.679T>C | p.Ser68Pro;<br>p.Ser95Pro;<br>p.Ser188Pro<br>p.Ser227Pro | 3   | FALSE | chr17:7577602:A:G   | 143:chr17:7577602:A:G   | 0.005731 |
| 71_c6-2  | 71  | FGFR4 | MODIFIER; MODERATE | c.1098-65G>A;<br>c.1251+10G>A;<br>c.1067G>A     | ; p.Arg356His                                            | 1   | FALSE | chr5:176520342:G:A  | 143:chr5:176520342:G:A  | 0.005831 |
| 71_c6-2  | 71  | TP53  | MODERATE           | c.270G>T;<br>c.351G>T;<br>c.630G>T;<br>c.747G>T | p.Arg90Ser;<br>p.Arg117Ser<br>p.Arg210Ser<br>p.Arg249Ser | 318 | FALSE | chr17:7577534:C:A   | 143:chr17:7577534:C:A   | 0.086207 |
| 71_c6-2  | 71  | IGF1R | MODERATE           | c.755G>A                                        | p.Arg252His                                              | 0   | FALSE | chr15:99434668:G:A  | 143:chr15:99434668:G:A  | 0.00678  |
| 71_c6-2  | 71  | FGFR4 | MODERATE; LOW      | c.1231A>G;<br>c.1351A>G;<br>c.1193+4A>G         | p.Ser411Gly<br>p.Ser451Gly                               | 1   | FALSE | chr5:176520506:A:G  | 143:chr5:176520506:A:G  | 0.005952 |
| 71_c6-2  | 71  | IGF1R | MODERATE           | c.3934T>C;<br>c.3937T>C                         | p.Ser1312Pro;<br>p.Ser1313Pro                            | 0   | FALSE | chr15:99500504:T:C  | 143:chr15:99500504:T:C  | 0.00885  |
| 71_c6-2  | 71  | FBXW7 | MODERATE           | c.1088C>T;<br>c.1202C>T;<br>c.1442C>T           | p.Ala363Val;<br>p.Ala401Val;<br>p.Ala481Val              | 0   | FALSE | chr4:153247360:G:A  | 143:chr4:153247360:G:A  | 0.005479 |

|         |    |       |                    |                                                 |                                                             |       |       |                    |                        |          |
|---------|----|-------|--------------------|-------------------------------------------------|-------------------------------------------------------------|-------|-------|--------------------|------------------------|----------|
| 71_c6-2 | 71 | EGFR  | MODIFIER; MODERATE | c.*2133G>A;<br>c.*2364G>A;<br>c.2030G>A         | p.Arg677His                                                 | 5     | FALSE | chr7:55240786:G:A  | 143:chr7:5240786:G:A   | 0.007576 |
| 26_c9-1 | 26 | TP53  | MODERATE; MODIFIER | c.199C>T;<br>c.82C>T; c.-279C>T; c.-360C>T      | p.Pro67Ser;<br>p.Pro28Ser;                                  | 3     | FALSE | chr17:7579488:G:A  | 144:chr17:7579488:G:A  | 0.003407 |
| 26_c9-1 | 26 | TP53  | MODERATE           | c.212C>T;<br>c.293C>T;<br>c.572C>T;<br>c.689C>T | p.Thr71Ile;<br>p.Thr98Ile;<br>p.Thr191Ile;<br>p.Thr230Ile   | 9     | FALSE | chr17:7577592:G:A  | 144:chr17:7577592:G:A  | 0.001931 |
| 26_c9-1 | 26 | RET   | MODERATE           | c.1531G>A                                       | p.Glu511Lys                                                 | 1     | FALSE | chr10:43607555:G:A | 144:chr10:43607555:G:A | 0.002427 |
| 26_c9-1 | 26 | TP53  | MODERATE           | c.350C>T;<br>c.431C>T;<br>c.710C>T;<br>c.827C>T | p.Ala117Val;<br>p.Ala144Val;<br>p.Ala237Val;<br>p.Ala276Val | 10    | FALSE | chr17:7577111:G:A  | 144:chr17:7577111:G:A  | 0.002581 |
| 26_c9-1 | 26 | EGFR  | MODERATE           | c.719G>A                                        | p.Cys240Tyr                                                 | 1     | FALSE | chr7:55220329:G:A  | 144:chr7:5220329:G:A   | 0.002725 |
| 26_c9-1 | 26 | FGFR3 | MODERATE           | c.1526G>A;<br>c.1862G>A;<br>c.1868G>A           | p.Arg509His;<br>p.Arg621His;<br>p.Arg623His                 | 2     | FALSE | chr4:1807803:G:A   | 144:chr4:1807803:G:A   | 0.00311  |
| 26_c9-1 | 26 | RET   | MODERATE           | c.1690A>C                                       | p.Thr564Pro                                                 | 1     | FALSE | chr10:43608342:A:C | 144:chr10:43608342:A:C | 0.005525 |
| 26_c9-1 | 26 | FGFR3 | MODERATE           | c.905G>A                                        | p.Gly302Asp                                                 | 1     | FALSE | chr4:1803727:G:A   | 144:chr4:1803727:G:A   | 0.003012 |
| 26_c9-1 | 26 | TP53  | MODERATE           | c.208T>A;<br>c.289T>A;<br>c.568T>A;<br>c.685T>A | p.Cys70Ser;<br>p.Cys97Ser;<br>p.Cys190Ser;<br>p.Cys229Ser   | 2     | FALSE | chr17:7577596:A:T  | 144:chr17:7577596:A:T  | 0.001992 |
| 26_c9-1 | 26 | BRAF  | MODERATE           | c.1799T>A                                       | p.Val600Glu                                                 | 23024 | FALSE | chr7:140453136:A:T | 144:chr7:140453136:A:T | 0.002793 |
| 26_c9-1 | 26 | KDR   | MODERATE           | c.1028C>T                                       | p.Thr343Met                                                 | 3     | FALSE | chr4:55976884:G:A  | 144:chr4:55976884:G:A  | 0.001529 |

|         |    |                    |                            |                                                                  |                                                                         |    |       |                        |                                |          |
|---------|----|--------------------|----------------------------|------------------------------------------------------------------|-------------------------------------------------------------------------|----|-------|------------------------|--------------------------------|----------|
| 26_c9-1 | 26 | NTRK2              | MODERATE                   | c.1984G>A;<br>;<br>c.2032G>A                                     | p.Ala662Thr<br>;<br>p.Ala678Thr                                         | 0  | FALSE | chr9:8757<br>0292:G:A  | 144:chr9:8<br>7570292:G<br>:A  | 0.002574 |
| 26_c9-1 | 26 | TP53               | MODERATE                   | c.371G>A;<br>;<br>c.452G>A;<br>;<br>c.731G>A;<br>;<br>c.848G>A   | p.Arg124His<br>;<br>p.Arg151His<br>;<br>p.Arg244His<br>;<br>p.Arg283His | 24 | FALSE | chr17:757<br>7090:C:T  | 144:chr17:<br>7577090:C<br>:T  | 0.002736 |
| 26_c9-1 | 26 | FGFR4              | MODERATE                   | c.1745G>A<br>;<br>c.1829G>A<br>;<br>c.1949G>A                    | p.Arg582His<br>;<br>p.Arg610His<br>;<br>p.Arg650His                     | 1  | FALSE | chr5:1765<br>23292:G:A | 144:chr5:1<br>76523292:<br>G:A | 0.005038 |
| 26_c9-1 | 26 | INSRR;<br>NTRK1    | MODIFIER; MODERATE         | c.3397+28<br>C>T;<br>c.13G>A                                     | ; p.Ala5Thr                                                             | 3  | FALSE | chr1:1568<br>11876:G:A | 144:chr1:1<br>56811876:<br>G:A | 0.002401 |
| 26_c9-1 | 26 | ALK                | MODERATE                   | c.1262C>T                                                        | p.Ala421Val                                                             | 1  | FALSE | chr2:2960<br>6618:G:A  | 144:chr2:2<br>9606618:G<br>:A  | 0.002491 |
| 26_c9-1 | 26 | NTRK1              | MODERATE                   | c.1359C>A<br>;<br>c.1449C>A<br>;<br>c.1467C>A                    | p.His453Gln<br>;<br>p.His483Gln<br>;<br>p.His489Gln                     | 1  | FALSE | chr1:1568<br>45424:C:A | 144:chr1:1<br>56845424:<br>C:A | 0.002296 |
| 26_c9-1 | 26 | MITF               | MODIFIER; MODERATE         | c.-45G>A;<br>;<br>c.109G>A;<br>;<br>c.112G>A;<br>;<br>c.64G>A    | ; p.Ala37Thr;<br>p.Ala38Thr;<br>p.Ala22Thr                              | 0  | FALSE | chr3:6992<br>8292:G:A  | 144:chr3:6<br>9928292:G<br>:A  | 0.002551 |
| 26_c9-1 | 26 | C9orf53;<br>CDKN2A | MODIFIER; MODERATE;<br>LOW | n.*616G>A<br>;<br>c.*201C>T;<br>;<br>c.278C>T;<br>;<br>c.321C>T  | p.Thr93Met;<br>p.His107His                                              | 2  | FALSE | chr9:2197<br>1080:G:A  | 144:chr9:2<br>1971080:G<br>:A  | 0.002597 |
| 26_c9-1 | 26 | IGF1R              | MODERATE                   | c.1940G>A                                                        | p.Arg647His                                                             | 0  | FALSE | chr15:994<br>59304:G:A | 144:chr15:<br>99459304:<br>G:A | 0.002472 |
| 26_c9-1 | 26 | TP53               | MODERATE; MODIFIER         | c.110C>T;<br>;<br>c.227C>T;<br>;<br>c.-279C>T;<br>;<br>c.-360C>T | p.Ala37Val;<br>p.Ala76Val;                                              | 1  | FALSE | chr17:757<br>9460:G:A  | 144:chr17:<br>7579460:G<br>:A  | 0.003311 |
| 26_c9-1 | 26 | EPHA3              | MODERATE                   | c.2306G>A                                                        | p.Arg769His                                                             | 0  | FALSE | chr3:8948<br>0469:G:A  | 144:chr3:8<br>9480469:G<br>:A  | 0.002747 |
| 26_c9-1 | 26 | NTRK2              | HIGH                       | c.1972C>T;<br>c.2020C>T                                          | p.Gln658*;<br>p.Gln674*                                                 | 0  | FALSE | chr9:8757<br>0280:C:T  | 144:chr9:8<br>7570280:C<br>:T  | 0.002571 |

|         |    |        |                    |                                                 |                                                            |    |       |                    |                        |          |
|---------|----|--------|--------------------|-------------------------------------------------|------------------------------------------------------------|----|-------|--------------------|------------------------|----------|
| 26_c9-1 | 26 | NF1    | MODERATE           | c.2695T>G                                       | p.Leu899Val                                                | 3  | FALSE | chr17:29556328:T:G | 144:chr17:29556328:T:G | 0.003736 |
| 26_c9-1 | 26 | DDR2   | MODERATE           | c.1418G>A                                       | p.Arg473His                                                | 2  | FALSE | chr1:162740216:G:A | 144:chr1:162740216:G:A | 0.002361 |
| 26_c9-1 | 26 | TSC2   | MODIFIER; MODERATE | c.2837+1108G>A;<br>c.2933G>A                    | p.Arg978His                                                | 0  | FALSE | chr16:2127694:G:A  | 144:chr16:2127694:G:A  | 0.004076 |
| 26_c9-1 | 26 | KIT    | MODERATE           | c.2671G>A;<br>c.2683G>A                         | p.Ala891Thr<br>p.Ala895Thr                                 | 3  | FALSE | chr4:55602973:G:A  | 144:chr4:55602973:G:A  | 0.002433 |
| 26_c9-1 | 26 | TP53   | MODIFIER; MODERATE | c.-17G>T;<br>c.344G>T;<br>c.461G>T;<br>c.65G>T  | p.Gly115Val;<br>p.Gly154Val;<br>p.Gly22Val                 | 39 | FALSE | chr17:7578469:C:A  | 144:chr17:7578469:C:A  | 0.002976 |
| 26_c9-1 | 26 | PIK3R1 | MODERATE           | c.386C>T                                        | p.Pro129Leu                                                | 1  | FALSE | chr5:67569269:C:T  | 144:chr5:67569269:C:T  | 0.005008 |
| 26_c9-1 | 26 | PIK3CA | HIGH               | c.3152G>A                                       | p.Trp1051*                                                 | 3  | FALSE | chr3:178952097:G:A | 144:chr3:178952097:G:A | 0.002433 |
| 26_c9-1 | 26 | CDKN2A | MODIFIER; MODERATE | c.194-3568A>C;<br>c.52A>C                       | p.Thr18Pro                                                 | 1  | FALSE | chr9:21974775:T:G  | 144:chr9:21974775:T:G  | 0.005085 |
| 26_c9-1 | 26 | VHL    | MODIFIER; MODERATE | c.341-3270A>C;<br>c.344A>C                      | p.His115Pro                                                | 0  | FALSE | chr3:10188201:A:C  | 144:chr3:10188201:A:C  | 0.004601 |
| 26_c9-1 | 26 | STK11  | MODERATE           | c.628T>C                                        | p.Cys210Arg                                                | 1  | FALSE | chr19:1220610:T:C  | 144:chr19:1220610:T:C  | 0.003454 |
| 26_c9-1 | 26 | TP53   | MODERATE           | c.224A>G;<br>c.305A>G;<br>c.584A>G;<br>c.701A>G | p.Tyr75Cys;<br>p.Tyr102Cys;<br>p.Tyr195Cys;<br>p.Tyr234Cys | 94 | FALSE | chr17:7577580:T:C  | 144:chr17:7577580:T:C  | 0.001916 |
| 26_c9-1 | 26 | EGFR   | MODERATE           | c.971G>A                                        | p.Arg324His                                                | 3  | FALSE | chr7:55223604:G:A  | 144:chr7:55223604:G:A  | 0.00311  |
| 26_c9-1 | 26 | IGF1R  | MODERATE           | c.3905T>C;<br>c.3908T>C                         | p.Val1302Ala;<br>p.Val1303Ala                              | 0  | FALSE | chr15:99500475:T:C | 144:chr15:99500475:T:C | 0.002841 |
| 26_c9-1 | 26 | BRAF   | HIGH               | c.1525C>T                                       | p.Arg509*                                                  | 1  | FALSE | chr7:140476881:G:A | 144:chr7:140476881:G:A | 0.003077 |

|           |    |                    |                            |                                                                              |                                                                                             |   |       |                             |                                 |          |
|-----------|----|--------------------|----------------------------|------------------------------------------------------------------------------|---------------------------------------------------------------------------------------------|---|-------|-----------------------------|---------------------------------|----------|
| 11_t2c1-2 | 11 | TP53               | MODERATE                   | c.106C>T;<br>c.25C>T;<br>c.385C>T;<br>c.502C>T                               | p.His36Tyr;<br>p.His9Tyr;<br>p.His129Tyr;<br>p.His168Tyr                                    | 9 | FALSE | chr17:757<br>8428:G:A       | 145:chr17:<br>7578428:G<br>:A   | 0.002899 |
| 11_t2c1-2 | 11 | EGFR               | MODERATE                   | c.1159C>G                                                                    | p.Leu387Val                                                                                 | 1 | FALSE | chr7:5522<br>4477:C:G       | 145:chr7:5<br>5224477:C<br>:G   | 0.003053 |
| 11_t2c1-2 | 11 | NOTCH1             | MODERATE                   | c.4252G>A                                                                    | p.Ala1418Thr                                                                                | 0 | FALSE | chr9:1394<br>00096:C:T      | 145:chr9:1<br>39400096:<br>C:T  | 0.00565  |
| 11_t2c1-2 | 11 | EGFR               | MODERATE                   | c.3352G>A                                                                    | p.Ala1118Thr                                                                                | 3 | FALSE | chr7:5527<br>3029:G:A       | 145:chr7:5<br>5273029:G<br>:A   | 0.002551 |
| 11_t2c1-2 | 11 | GNA11              | MODERATE                   | c.88C>T                                                                      | p.Arg30Trp                                                                                  | 1 | FALSE | chr19:309<br>4737:C:T       | 145:chr19:<br>3094737:C<br>:T   | 0.00885  |
| 11_t2c1-2 | 11 | C9orf53;<br>CDKN2A | MODIFIER; MODERATE;<br>LOW | n.*616G>A<br>;<br>c.*180C>T;<br>c.257C>T;<br>c.300C>T                        | p.Ala86Val;<br>p.Cys100Cys                                                                  | 1 | FALSE | chr9:2197<br>1101:G:A       | 145:chr9:2<br>1971101:G<br>:A   | 0.002837 |
| 11_t2c1-2 | 11 | NTRK1              | MODERATE                   | c.1940T>G<br>;<br>c.2030T>G<br>;<br>c.2048T>G                                | p.Val647Gly;<br>p.Val677Gly;<br>p.Val683Gly                                                 | 2 | FALSE | chr1:1568<br>49792:T:G      | 145:chr1:1<br>56849792:<br>T:G  | 0.005155 |
| 11_t2c1-2 | 11 | GNAQ               | MODERATE                   | c.673T>C                                                                     | p.Ser225Pro                                                                                 | 1 | FALSE | chr9:8040<br>9441:A:G       | 145:chr9:8<br>0409441:A<br>:G   | 0.00315  |
| 11_t2c1-2 | 11 | ATM                | MODERATE                   | c.1010G>A                                                                    | p.Arg337His                                                                                 | 0 | FALSE | chr11:108<br>117799:G:<br>A | 145:chr11:<br>10811779<br>9:G:A | 0.003044 |
| 11_t2c1-2 | 11 | FGFR1              | MODERATE                   | c.1013C>T;<br>c.1019C>T;<br>c.1112C>T;<br>c.746C>T;<br>c.752C>T;<br>c.995C>T | p.Thr338Met;<br>p.Thr340Met;<br>p.Thr371Met;<br>p.Thr249Met;<br>p.Thr251Met;<br>p.Thr332Met | 2 | FALSE | chr8:3827<br>9377:G:A       | 145:chr8:3<br>8279377:G<br>:A   | 0.0033   |
| 11_t2c1-2 | 11 | PTEN               | MODERATE                   | c.394G>A                                                                     | p.Gly132Ser                                                                                 | 3 | FALSE | chr10:896<br>92910:G:A      | 145:chr10:<br>89692910:<br>G:A  | 0.003021 |
| 11_t2c1-2 | 11 | PTEN               | MODERATE                   | c.821G>T                                                                     | p.Trp274Leu                                                                                 | 6 | FALSE | chr10:897<br>20670:G:T      | 145:chr10:<br>89720670:<br>G:T  | 0.004762 |
| 11_t2c1-2 | 11 | NTRK3              | MODERATE                   | c.1351C>T;<br>c.1375C>T                                                      | p.Arg451Trp<br>;<br>p.Arg459Trp                                                             | 0 | FALSE | chr15:886<br>69523:G:A      | 145:chr15:<br>88669523:<br>G:A  | 0.002721 |

|           |    |                    |                    |                                                       |                                                         |       |       |                        |                                |          |
|-----------|----|--------------------|--------------------|-------------------------------------------------------|---------------------------------------------------------|-------|-------|------------------------|--------------------------------|----------|
| 11_t2c1-2 | 11 | MITF               | MODERATE           | c.125A>C;<br>c.233A>C;<br>c.278A>C;<br>c.281A>C       | p.Gln42Pro;<br>p.Gln78Pro;<br>p.Gln93Pro;<br>p.Gln94Pro | 0     | FALSE | chr3:6992<br>8461:A:C  | 145:chr3:6<br>9928461:A<br>:C  | 0.002729 |
| 11_t2c1-2 | 11 | TP53               | MODIFIER; MODERATE | c.-11C>T;<br>c.-92C>T;<br>c.269C>T;<br>c.386C>T       | ; p.Ala90Val;<br>p.Ala129Val                            | 2     | FALSE | chr17:757<br>8544:G:A  | 145:chr17:<br>7578544:G<br>:A  | 0.002959 |
| 11_t2c1-2 | 11 | C9orf53;<br>CDKN2A | MODIFIER; MODERATE | n.*616G>A<br>;<br>c.*218C>T;<br>c.295C>T;<br>c.338C>T | p.Arg99Trp;<br>p.Pro113Leu                              | 2     | FALSE | chr9:2197<br>1063:G:A  | 145:chr9:2<br>1971063:G<br>:A  | 0.002621 |
| 11_t2c1-2 | 11 | DDR2               | MODERATE           | c.1625C>T                                             | p.Ala542Val                                             | 1     | FALSE | chr1:1627<br>41934:C:T | 145:chr1:1<br>62741934:<br>C:T | 0.002451 |
| 11_t2c1-2 | 11 | VHL                | MODIFIER; MODERATE | c.341-<br>3270A>C;<br>c.344A>C                        | ; p.His115Pro                                           | 0     | FALSE | chr3:1018<br>8201:A:C  | 145:chr3:1<br>0188201:A<br>:C  | 0.003584 |
| 11_t2c1-2 | 11 | MET                | MODERATE           | c.3965C>A<br>;<br>c.4019C>A                           | p.Pro1322His;<br>p.Pro1340His                           | 1     | FALSE | chr7:1164<br>35970:C:A | 145:chr7:1<br>16435970:<br>C:A | 0.002821 |
| 11_t2c1-2 | 11 | NF1                | MODERATE           | c.5426G>A<br>;<br>c.5489G>A                           | p.Arg1809His;<br>p.Arg1830His                           | 1     | FALSE | chr17:296<br>54737:G:A | 145:chr17:<br>29654737:<br>G:A | 0.002384 |
| 11_t2c1-2 | 11 | AR                 | MODERATE           | c.2360G>A<br>; c.764G>A                               | p.Arg787Gln<br>; p.Arg255Gln                            | 0     | FALSE | chrX:6694<br>1716:G:A  | 145:chrX:6<br>6941716:G<br>:A  | 0.002611 |
| 11_t2c1-2 | 11 | FBXW7              | MODERATE           | c.1039C>T;<br>c.1153C>T;<br>c.1393C>T                 | p.Arg347Cys<br>;<br>p.Arg385Cys<br>p.Arg465Cys          | 0     | FALSE | chr4:1532<br>49385:G:A | 145:chr4:1<br>53249385:<br>G:A | 0.003252 |
| 11_t2c1-2 | 11 | SMO                | MODERATE           | c.961G>A                                              | p.Val321Met                                             | 0     | FALSE | chr7:1288<br>46031:G:A | 145:chr7:1<br>28846031:<br>G:A | 0.002717 |
| 11_t2c1-2 | 11 | FGFR4              | MODIFIER; MODERATE | c.1058-<br>174G>A;<br>c.1078G>A                       | ; p.Ala360Thr                                           | 1     | FALSE | chr5:1765<br>20159:G:A | 145:chr5:1<br>76520159:<br>G:A | 0.002933 |
| 11_t2c1-2 | 11 | NOTCH1             | MODERATE           | c.4901C>T                                             | p.Ala1634Val                                            | 0     | FALSE | chr9:1393<br>99242:G:A | 145:chr9:1<br>39399242:<br>G:A | 0.002994 |
| 11_t2c1-2 | 11 | KRAS               | MODERATE           | c.35G>T                                               | p.Gly12Val                                              | 11213 | FALSE | chr12:253<br>98284:C:A | 145:chr12:<br>25398284:<br>C:A | 0.052727 |

|            |     |                 |                    |                                                  |                                                                         |       |       |                        |                                |          |
|------------|-----|-----------------|--------------------|--------------------------------------------------|-------------------------------------------------------------------------|-------|-------|------------------------|--------------------------------|----------|
| 11_t2c1-2  | 11  | TP53            | MODERATE           | c.128G>A;<br>c.407G>A;<br>c.47G>A;<br>c.524G>A   | p.Arg43His;<br>p.Arg136His<br>;<br>p.Arg16His;<br>p.Arg175His           | 979   | FALSE | chr17:757<br>8406:C:T  | 145:chr17:<br>7578406:C<br>:T  | 0.035276 |
| 11_t2c1-2  | 11  | IGF1R           | MODERATE           | c.1565G>A                                        | p.Ser522Asn                                                             | 0     | FALSE | chr15:994<br>54646:G:A | 145:chr15:<br>99454646:<br>G:A | 0.002597 |
| 11_t2c1-2  | 11  | INSRR;<br>NTRK1 | MODIFIER; MODERATE | c.3397+24<br>A>G;<br>c.17T>C                     | ; p.Leu6Pro                                                             | 1     | FALSE | chr1:1568<br>11880:T:C | 145:chr1:1<br>56811880:<br>T:C | 0.002384 |
| 11_t2c1-2  | 11  | KDR             | MODERATE           | c.2378A>G                                        | p.Asn793Ser                                                             | 1     | FALSE | chr4:5596<br>4435:T:C  | 145:chr4:5<br>5964435:T<br>:C  | 0.003745 |
| 11_t2c1-2  | 11  | CTNNB1          | MODERATE           | c.643G>A                                         | p.Ala215Thr                                                             | 0     | FALSE | chr3:4126<br>6972:G:A  | 145:chr3:4<br>1266972:G<br>:A  | 0.002653 |
| 11_t2c1-2  | 11  | STK11           | MODERATE           | c.628T>C                                         | p.Cys210Arg                                                             | 1     | FALSE | chr19:122<br>0610:T:C  | 145:chr19:<br>1220610:T<br>:C  | 0.010684 |
| 11_t2c1-2  | 11  | KDR             | MODERATE           | c.2497C>T                                        | p.Arg833Trp                                                             | 1     | FALSE | chr4:5596<br>4316:G:A  | 145:chr4:5<br>5964316:G<br>:A  | 0.003086 |
| 132_c1w3-2 | 132 | BRAF            | MODERATE           | c.1799T>A                                        | p.Val600Glu                                                             | 23024 | FALSE | chr7:1404<br>53136:A:T | 146:chr7:1<br>40453136:<br>A:T | 0.093443 |
| 132_c1w3-2 | 132 | EGFR            | MODERATE           | c.1159C>G                                        | p.Leu387Val                                                             | 1     | FALSE | chr7:5522<br>4477:C:G  | 146:chr7:5<br>5224477:C<br>:G  | 0.004354 |
| 132_c1w3-2 | 132 | RPL19           | MODERATE           | c.452G>A                                         | p.Arg151His                                                             | 0     | FALSE | chr17:373<br>60425:G:A | 146:chr17:<br>37360425:<br>G:A | 0.003284 |
| 132_c1w3-2 | 132 | PDGFRA          | MODERATE           | c.2465G>A                                        | p.Arg822His                                                             | 3     | FALSE | chr4:5515<br>2033:G:A  | 146:chr4:5<br>5152033:G<br>:A  | 0.003322 |
| 132_c1w3-2 | 132 | TP53            | MODERATE           | c.400G>T;<br>c.481G>T;<br>c.760G>T;<br>c.877G>T  | p.Gly134Trp<br>;<br>p.Gly161Trp<br>;<br>p.Gly254Trp<br>;<br>p.Gly293Trp | 4     | FALSE | chr17:757<br>7061:C:A  | 146:chr17:<br>7577061:C<br>:A  | 0.00321  |
| 132_c1w3-2 | 132 | ERBB2           | MODERATE; MODIFIER | c.872A>G;<br>c.917A>G;<br>c.962A>G;<br>n.1286A>G | p.Glu291Gly<br>;<br>p.Glu306Gly<br>;<br>p.Glu321Gly<br>;                | 1     | FALSE | chr17:378<br>68241:A:G | 146:chr17:<br>37868241:<br>A:G | 0.003175 |
| 132_c1w3-2 | 132 | EGFR            | MODERATE           | c.971G>A                                         | p.Arg324His                                                             | 3     | FALSE | chr7:5522<br>3604:G:A  | 146:chr7:5<br>5223604:G<br>:A  | 0.00565  |
| 132_c1w3-2 | 132 | NF1             | MODERATE           | c.2695T>G                                        | p.Leu899Val                                                             | 3     | FALSE | chr17:295<br>56328:T:G | 146:chr17:<br>29556328:<br>T:G | 0.008584 |



|            |     |                            |                    |                                                                                                                      |                                                               |   |       |                             |                                 |          |
|------------|-----|----------------------------|--------------------|----------------------------------------------------------------------------------------------------------------------|---------------------------------------------------------------|---|-------|-----------------------------|---------------------------------|----------|
| 132_c1w3-2 | 132 | CDKN2B;<br>CDKN2B-AS1      | MODIFIER; MODERATE | c.*253C>T;<br>c.367C>T;<br>n.371+108<br>76G>A                                                                        | p.Arg123Trp                                                   | 0 | FALSE | chr9:2200<br>6036:G:A       | 146:chr9:2<br>2006036:G<br>:A   | 0.004184 |
| 132_c1w3-2 | 132 | IDH2                       | MODERATE           | c.320G>A;<br>c.476G>A;<br>c.86G>A                                                                                    | p.Arg107His<br>;<br>p.Arg159His<br>; p.Arg29His               | 1 | FALSE | chr15:906<br>31877:C:T      | 146:chr15:<br>90631877:<br>C:T  | 0.004024 |
| 132_c1w3-2 | 132 | EGFR;<br>EGFR-AS1          | MODERATE; MODIFIER | c.2515G>A<br>; n.-1C>T                                                                                               | p.Ala839Thr<br>;                                              | 4 | FALSE | chr7:5525<br>9457:G:A       | 146:chr7:5<br>5259457:G<br>:A   | 0.003101 |
| 132_c1w3-2 | 132 | ATM                        | MODERATE           | c.8369G>A                                                                                                            | p.Arg2790Ly<br>s                                              | 0 | FALSE | chr11:108<br>214049:G:<br>A | 146:chr11:<br>10821404<br>9:G:A | 0.003155 |
| 132_c1w3-2 | 132 | EGFR                       | MODERATE           | c.977G>A                                                                                                             | p.Cys326Tyr                                                   | 1 | FALSE | chr7:5522<br>3610:G:A       | 146:chr7:5<br>5223610:G<br>:A   | 0.003839 |
| 132_c1w3-2 | 132 | TP53                       | MODERATE           | c.127C>T;<br>c.208C>T;<br>c.487C>T;<br>c.604C>T                                                                      | p.Arg43Cys;<br>p.Arg70Cys;<br>p.Arg163Cys<br>;<br>p.Arg202Cys | 6 | FALSE | chr17:757<br>8245:G:A       | 146:chr17:<br>7578245:G<br>:A   | 0.002981 |
| 132_c1w3-2 | 132 | CDKN2A                     | MODIFIER; MODERATE | c.194-<br>3568A>C;<br>c.52A>C                                                                                        | p.Thr18Pro                                                    | 1 | FALSE | chr9:2197<br>4775:T:G       | 146:chr9:2<br>1974775:T<br>:G   | 0.005464 |
| 132_c1w3-2 | 132 | PIK3CA                     | MODERATE           | c.3137C>A                                                                                                            | p.Ala1046Gl<br>u                                              | 3 | FALSE | chr3:1789<br>52082:C:A      | 146:chr3:1<br>78952082:<br>C:A  | 0.002972 |
| 132_c1w3-2 | 132 | MITF                       | MODIFIER; MODERATE | c.-45G>A;<br>c.109G>A;<br>c.112G>A;<br>c.64G>A                                                                       | p.Ala37Thr;<br>p.Ala38Thr;<br>p.Ala22Thr                      | 0 | FALSE | chr3:6992<br>8292:G:A       | 146:chr3:6<br>9928292:G<br>:A   | 0.003295 |
| 132_c1w3-2 | 132 | GAPDH;<br>IFFO1;<br>NCAPD2 | MODERATE; MODIFIER | c.148G>A;<br>c.274G>A;<br>c.*1743C><br>T;<br>c.*1746C><br>T;<br>c.*1770C><br>T;<br>n.*2798C><br>T;<br>c.*4252G><br>A | p.Ala50Thr;<br>p.Ala92Thr;                                    | 0 | FALSE | chr12:664<br>6123:G:A       | 146:chr12:<br>6646123:G<br>:A   | 0.003861 |
| 132_c1w3-2 | 132 | KIT                        | MODERATE           | c.2854C>T;<br>c.2866C>T                                                                                              | p.Arg952Trp<br>;<br>p.Arg956Trp                               | 3 | FALSE | chr4:5560<br>4658:C:T       | 146:chr4:5<br>5604658:C<br>:T   | 0.00319  |

|            |     |                           |                    |                                                                                 |                                                                                                                 |    |       |                        |                                |          |
|------------|-----|---------------------------|--------------------|---------------------------------------------------------------------------------|-----------------------------------------------------------------------------------------------------------------|----|-------|------------------------|--------------------------------|----------|
| 132_c1w3-2 | 132 | TSC1                      | MODERATE           | c.457C>T;<br>c.610C>T                                                           | p.Arg153Cys<br>;<br>p.Arg204Cys                                                                                 | 0  | FALSE | chr9:1357<br>97259:G:A | 146:chr9:1<br>35797259:<br>G:A | 0.003484 |
| 132_c1w3-2 | 132 | NOTCH1                    | MODERATE           | c.2644G>A                                                                       | p.Ala882Thr                                                                                                     | 0  | FALSE | chr9:1394<br>05201:C:T | 146:chr9:1<br>39405201:<br>C:T | 0.005063 |
| 132_c1w3-2 | 132 | IGF1R                     | MODERATE           | c.3934T>C;<br>c.3937T>C                                                         | p.Ser1312Pro;<br>p.Ser1313Pro                                                                                   | 0  | FALSE | chr15:995<br>00504:T:C | 146:chr15:<br>99500504:<br>T:C | 0.013008 |
| 132_c1w3-2 | 132 | IDH2                      | MODERATE           | c.122G>A;<br>c.356G>A;<br>c.512G>A                                              | p.Gly41Asp;<br>p.Gly119Asp<br>;<br>p.Gly171Asp                                                                  | 5  | FALSE | chr15:906<br>31841:C:T | 146:chr15:<br>90631841:<br>C:T | 0.003704 |
| 132_c1w3-2 | 132 | FGFR1                     | MODERATE           | c.1135C>T;<br>c.1141C>T;<br>c.1378C>T;<br>c.1402C>T;<br>c.1408C>T;<br>c.1501C>T | p.Arg379Cys<br>;<br>p.Arg381Cys<br>;<br>p.Arg460Cys<br>;<br>p.Arg468Cys<br>;<br>p.Arg470Cys<br>;<br>p.Arg501Cys | 1  | FALSE | chr8:3827<br>5768:G:A  | 146:chr8:3<br>8275768:G<br>:A  | 0.002899 |
| 132_c1w3-2 | 132 | KDR                       | MODERATE           | c.2323G>T                                                                       | p.Ala775Ser                                                                                                     | 1  | FALSE | chr4:5596<br>4914:C:A  | 146:chr4:5<br>5964914:C<br>:A  | 0.00295  |
| 132_c1w3-2 | 132 | CDH1                      | MODERATE           | c.1676G>A                                                                       | p.Ser559Asn                                                                                                     | 0  | FALSE | chr16:688<br>53293:G:A | 146:chr16:<br>68853293:<br>G:A | 0.003284 |
| 132_c1w3-2 | 132 | PHLPP1                    | MODERATE           | c.3499G>A                                                                       | p.Ala1167Thr                                                                                                    | 0  | FALSE | chr18:606<br>30644:G:A | 146:chr18:<br>60630644:<br>G:A | 0.003361 |
| 132_c1w3-2 | 132 | FGFR4                     | MODIFIER; MODERATE | c.1193+43<br>C>T;<br>c.1270C>T;<br>c.1390C>T                                    | p.Arg424Trp<br>;<br>p.Arg464Trp                                                                                 | 1  | FALSE | chr5:1765<br>20545:C:T | 146:chr5:1<br>76520545:<br>C:T | 0.003431 |
| 132_c1w3-2 | 132 | KDR                       | HIGH               | c.2830C>T                                                                       | p.Arg944*                                                                                                       | 1  | FALSE | chr4:5596<br>1110:G:A  | 146:chr4:5<br>5961110:G<br>:A  | 0.003891 |
| 5_t2c9-2   | 5   | CDKN2A;<br>CDKN2B-<br>AS1 | MODERATE; MODIFIER | c.98A>G;<br>n.-1T>C                                                             | p.Glu33Gly;                                                                                                     | 1  | FALSE | chr9:2199<br>4233:T:C  | 148:chr9:2<br>1994233:T<br>:C  | 0.021739 |
| 5_t2c9-2   | 5   | ALK                       | MODERATE           | c.3089A>C                                                                       | p.His1030Pro                                                                                                    | 15 | TRUE  | chr2:2944<br>8410:T:G  | 148:chr2:2<br>9448410:T<br>:G  | 0.106796 |
| 73_bl-2    | 73  | NOTCH1                    | MODERATE           | c.2528A>G                                                                       | p.Glu843Gly                                                                                                     | 0  | FALSE | chr9:1394<br>05663:T:C | 150:chr9:1<br>39405663:<br>T:C | 0.214953 |

|         |    |                                 |                    |                                                                                                                                                                                |                                                                                  |    |       |                        |                                |          |
|---------|----|---------------------------------|--------------------|--------------------------------------------------------------------------------------------------------------------------------------------------------------------------------|----------------------------------------------------------------------------------|----|-------|------------------------|--------------------------------|----------|
| 73_bl-2 | 73 | FGFR1;<br>LETM2                 | HIGH; MODIFIER     | c.1972C>T;<br>c.1978C>T;<br>c.2215C>T;<br>c.2239C>T;<br>c.2245C>T;<br>c.2338C>T;<br>c.*1406G><br>A;<br>c.*1423G><br>A;<br>c.*1553G><br>A;<br>c.*1567G><br>A;<br>c.*1638G><br>A | p.Gln658*;<br>p.Gln660*;<br>p.Gln739*;<br>p.Gln747*;<br>p.Gln749*;<br>p.Gln780*; | 1  | FALSE | chr8:3827<br>1483:G:A  | 150:chr8:3<br>8271483:G<br>:A  | 0.011628 |
| 73_bl-2 | 73 | KIT                             | MODERATE           | c.13C>T                                                                                                                                                                        | p.Arg5Cys                                                                        | 1  | FALSE | chr4:5552<br>4194:C:T  | 150:chr4:5<br>5524194:C<br>:T  | 0.013158 |
| 73_bl-2 | 73 | NF1                             | MODERATE           | c.6011C>T;<br>c.6074C>T                                                                                                                                                        | p.Ser2004Le<br>u;<br>p.Ser2025Le<br>u                                            | 1  | FALSE | chr17:296<br>63418:C:T | 150:chr17:<br>29663418:<br>C:T | 0.010363 |
| 73_c3-2 | 73 | ESR1                            | MODERATE           | c.739G>A;<br>c.745G>A                                                                                                                                                          | p.Glu247Lys<br>;<br>p.Glu249Lys                                                  | 0  | FALSE | chr6:1522<br>01885:G:A | 151:chr6:1<br>52201885:<br>G:A | 0.023256 |
| 73_c6-2 | 73 | ALK                             | MODERATE           | c.3089A>C                                                                                                                                                                      | p.His1030Pr<br>o                                                                 | 15 | TRUE  | chr2:2944<br>8410:T:G  | 152:chr2:2<br>9448410:T<br>:G  | 0.095745 |
| 73_c6-2 | 73 | NOTCH1                          | MODERATE           | c.2528A>G                                                                                                                                                                      | p.Glu843Gly                                                                      | 0  | FALSE | chr9:1394<br>05663:T:C | 152:chr9:1<br>39405663:<br>T:C | 0.223881 |
| 69_bl-1 | 69 | CDKN2A                          | MODIFIER; MODERATE | c.194-<br>3537T>G;<br>c.83T>G                                                                                                                                                  | ; p.Val28Gly                                                                     | 1  | FALSE | chr9:2197<br>4744:A:C  | 155:chr9:2<br>1974744:A<br>:C  | 0.134921 |
| 69_bl-1 | 69 | CDKN2A                          | MODIFIER; MODERATE | c.194-<br>3546T>G;<br>c.74T>G                                                                                                                                                  | ; p.Val25Gly                                                                     | 2  | FALSE | chr9:2197<br>4753:A:C  | 155:chr9:2<br>1974753:A<br>:C  | 0.38125  |
| 69_bl-1 | 69 | FOXL2;<br>FOXL2NB;<br>LINC01391 | MODERATE; MODIFIER | c.282T>A;<br>c.-132A>T;<br>n.-1T>A                                                                                                                                             | p.Asn94Lys;                                                                      | 0  | FALSE | chr3:1386<br>65283:A:T | 155:chr3:1<br>38665283:<br>A:T | 0.066225 |
| 69_bl-1 | 69 | PIK3CA                          | MODERATE           | c.35G>A                                                                                                                                                                        | p.Gly12Asp                                                                       | 5  | FALSE | chr3:1789<br>16648:G:A | 155:chr3:1<br>78916648:<br>G:A | 0.006042 |
| 69_bl-1 | 69 | RET                             | MODERATE           | c.1690A>C                                                                                                                                                                      | p.Thr564Pro                                                                      | 1  | FALSE | chr10:436<br>08342:A:C | 155:chr10:<br>43608342:<br>A:C | 0.033033 |
| 69_bl-1 | 69 | PTEN                            | MODERATE           | c.389G>A                                                                                                                                                                       | p.Arg130Gln                                                                      | 89 | FALSE | chr10:896<br>92905:G:A | 155:chr10:<br>89692905:<br>G:A | 0.007634 |

|          |     |                                 |                            |                                                             |                                                        |   |       |                    |                        |          |
|----------|-----|---------------------------------|----------------------------|-------------------------------------------------------------|--------------------------------------------------------|---|-------|--------------------|------------------------|----------|
| 69_bl-1  | 69  | IGF1R                           | MODERATE                   | c.3934T>C;<br>c.3937T>C                                     | p.Ser1312Pro;<br>p.Ser1313Pro                          | 0 | FALSE | chr15:99500504:T:C | 155:chr15:99500504:T:C | 0.041096 |
| 69_bl-1  | 69  | GNA11                           | MODERATE                   | c.440G>A                                                    | p.Arg147His                                            | 1 | FALSE | chr19:3113446:G:A  | 155:chr19:3113446:G:A  | 0.00885  |
| 73_c4-2  | 73  | RET                             | MODERATE                   | c.1690A>C                                                   | p.Thr564Pro                                            | 1 | FALSE | chr10:43608342:A:C | 156:chr10:43608342:A:C | 0.022346 |
| 73_c4-2  | 73  | CDKN2A                          | MODIFIER; MODERATE         | c.194-3546T>G;<br>c.74T>G                                   | ; p.Val25Gly                                           | 2 | FALSE | chr9:21974753:A:C  | 156:chr9:21974753:A:C  | 0.395349 |
| 73_c4-2  | 73  | IGF1R                           | MODERATE                   | c.3934T>C;<br>c.3937T>C                                     | p.Ser1312Pro;<br>p.Ser1313Pro                          | 0 | FALSE | chr15:99500504:T:C | 156:chr15:99500504:T:C | 0.012821 |
| 73_c4-2  | 73  | C9orf53;<br>CDKN2A              | MODIFIER; MODERATE;<br>LOW | n.*616T>G;<br>;<br>c.*120A>C;<br>;<br>c.197A>C;<br>c.240A>C | p.His66Pro;<br>p.Pro80Pro                              | 1 | FALSE | chr9:21971161:T:G  | 156:chr9:21971161:T:G  | 0.2      |
| 106_c3-2 | 106 | FOXL2;<br>FOXL2NB;<br>LINC01391 | MODERATE; MODIFIER         | c.282T>A;<br>c.-132A>T;<br>n.-1T>A                          | p.Asn94Lys;                                            | 0 | FALSE | chr3:138665283:A:T | 157:chr3:138665283:A:T | 0.046948 |
| 106_c3-2 | 106 | MITF                            | MODERATE                   | c.130C>T;<br>c.175C>T;<br>c.178C>T;<br>c.22C>T              | p.Arg44Cys;<br>p.Arg59Cys;<br>p.Arg60Cys;<br>p.Arg8Cys | 0 | FALSE | chr3:69928358:C:T  | 157:chr3:69928358:C:T  | 0.005076 |
| 106_c3-2 | 106 | ALK                             | MODERATE                   | c.619G>A                                                    | p.Ala207Thr                                            | 1 | FALSE | chr2:30142907:C:T  | 157:chr2:30142907:C:T  | 0.00823  |
| 106_c3-2 | 106 | SMO                             | MODERATE                   | c.1843T>C                                                   | p.Ser615Pro                                            | 0 | FALSE | chr7:128851518:T:C | 157:chr7:128851518:T:C | 0.004878 |
| 106_c3-2 | 106 | IGF1R                           | MODERATE                   | c.3934T>C;<br>c.3937T>C                                     | p.Ser1312Pro;<br>p.Ser1313Pro                          | 0 | FALSE | chr15:99500504:T:C | 157:chr15:99500504:T:C | 0.036082 |
| 106_c3-2 | 106 | CDKN2A                          | MODIFIER; MODERATE         | c.194-3546T>G;<br>c.74T>G                                   | ; p.Val25Gly                                           | 2 | FALSE | chr9:21974753:A:C  | 157:chr9:21974753:A:C  | 0.325843 |
| 106_c3-2 | 106 | KDR                             | MODERATE                   | c.1028C>T                                                   | p.Thr343Met                                            | 3 | FALSE | chr4:55976884:G:A  | 157:chr4:55976884:G:A  | 0.00367  |
| 106_c3-2 | 106 | PDGFRA                          | MODERATE                   | c.685G>A                                                    | p.Glu229Lys                                            | 3 | FALSE | chr4:55131142:G:A  | 157:chr4:55131142:G:A  | 0.005556 |

|          |     |                           |                            |                                                           |                                                               |       |       |                        |                                |          |
|----------|-----|---------------------------|----------------------------|-----------------------------------------------------------|---------------------------------------------------------------|-------|-------|------------------------|--------------------------------|----------|
| 106_c3-2 | 106 | TP53                      | MODERATE                   | c.200G>A;<br>c.281G>A;<br>c.560G>A;<br>c.677G>A           | p.Gly67Asp;<br>p.Gly94Asp;<br>p.Gly187Asp<br>;<br>p.Gly226Asp | 5     | FALSE | chr17:757<br>7604:C:T  | 157:chr17:<br>7577604:C<br>:T  | 0.00554  |
| 106_c3-2 | 106 | KRAS                      | MODERATE                   | c.35G>A                                                   | p.Gly12Asp                                                    | 11213 | FALSE | chr12:253<br>98284:C:T | 157:chr12:<br>25398284:<br>C:T | 0.034483 |
| 106_c3-2 | 106 | TP53                      | MODIFIER; MODERATE         | c.-17C>T;<br>c.-98C>T;<br>c.263C>T;<br>c.380C>T           | ;<br>p.Ser88Phe;<br>p.Ser127Phe                               | 38    | FALSE | chr17:757<br>8550:G:A  | 157:chr17:<br>7578550:G<br>:A  | 0.021407 |
| 106_c3-2 | 106 | RET                       | MODERATE                   | c.1690A>C                                                 | p.Thr564Pro                                                   | 1     | FALSE | chr10:436<br>08342:A:C | 157:chr10:<br>43608342:<br>A:C | 0.028902 |
| 106_c3-2 | 106 | C9orf53;<br>CDKN2A        | MODIFIER; MODERATE;<br>LOW | n.*616T>G<br>;<br>c.*120A>C<br>;<br>c.197A>C;<br>c.240A>C | ;<br>p.His66Pro;<br>p.Pro80Pro                                | 1     | FALSE | chr9:2197<br>1161:T:G  | 157:chr9:2<br>1971161:T<br>:G  | 0.09322  |
| 106_c3-2 | 106 | KIT                       | MODERATE                   | c.2671G>A<br>;<br>c.2683G>A                               | p.Ala891Thr<br>;<br>p.Ala895Thr                               | 3     | FALSE | chr4:5560<br>2973:G:A  | 157:chr4:5<br>5602973:G<br>:A  | 0.005181 |
| 106_c3-2 | 106 | CDKN2A                    | MODIFIER; MODERATE         | c.194-<br>3537T>G;<br>c.83T>G                             | ;<br>p.Val28Gly                                               | 1     | FALSE | chr9:2197<br>4744:A:C  | 157:chr9:2<br>1974744:A<br>:C  | 0.116883 |
| 106_c3-2 | 106 | SMO                       | MODERATE                   | c.1045A>C                                                 | p.Thr349Pro                                                   | 0     | FALSE | chr7:1288<br>46115:A:C | 157:chr7:1<br>28846115:<br>A:C | 0.008696 |
| 106_bl-1 | 106 | CDKN2A;<br>CDKN2B-<br>AS1 | MODERATE; MODIFIER         | c.98A>G;<br>n.-1T>C                                       | p.Glu33Gly;                                                   | 1     | FALSE | chr9:2199<br>4233:T:C  | 158:chr9:2<br>1994233:T<br>:C  | 0.022523 |
| 106_bl-1 | 106 | SMO                       | MODERATE                   | c.1045A>C                                                 | p.Thr349Pro                                                   | 0     | FALSE | chr7:1288<br>46115:A:C | 158:chr7:1<br>28846115:<br>A:C | 0.005391 |
| 106_bl-1 | 106 | NTRK3                     | MODERATE                   | c.1139C>T                                                 | p.Ala380Val                                                   | 0     | FALSE | chr15:886<br>78397:G:A | 158:chr15:<br>88678397:<br>G:A | 0.005195 |
| 106_bl-1 | 106 | CDKN2A                    | MODIFIER; MODERATE         | c.194-<br>3546T>G;<br>c.74T>G                             | ;<br>p.Val25Gly                                               | 2     | FALSE | chr9:2197<br>4753:A:C  | 158:chr9:2<br>1974753:A<br>:C  | 0.1875   |
| 106_bl-1 | 106 | NRAS                      | MODERATE                   | c.437C>T                                                  | p.Ala146Val                                                   | 1     | FALSE | chr1:1152<br>52203:G:A | 158:chr1:1<br>15252203:<br>G:A | 0.007042 |
| 106_bl-1 | 106 | TP53                      | MODIFIER; MODERATE         | c.-17C>T;<br>c.-98C>T;<br>c.263C>T;<br>c.380C>T           | ;<br>p.Ser88Phe;<br>p.Ser127Phe                               | 38    | FALSE | chr17:757<br>8550:G:A  | 158:chr17:<br>7578550:G<br>:A  | 0.005747 |

|          |     |                             |                    |                                                                                               |                                                          |       |       |                        |                                |          |
|----------|-----|-----------------------------|--------------------|-----------------------------------------------------------------------------------------------|----------------------------------------------------------|-------|-------|------------------------|--------------------------------|----------|
| 106_bl-1 | 106 | ERBB2;<br>MIEN1;<br>MIR4728 | MODERATE; MODIFIER | c.2720A>G<br>;<br>c.2765A>G<br>;<br>c.2810A>G<br>;<br>n.3134A>G<br>;<br>c.*388T>C;<br>n.-1A>G | p.Lys907Arg<br>;<br>p.Lys922Arg<br>;<br>p.Lys937Arg<br>; | 1     | FALSE | chr17:378<br>82044:A:G | 158:chr17:<br>37882044:<br>A:G | 0.00542  |
| 106_bl-1 | 106 | SMO                         | MODERATE           | c.628G>A                                                                                      | p.Val210Met                                              | 0     | FALSE | chr7:1288<br>45134:G:A | 158:chr7:1<br>28845134:<br>G:A | 0.005814 |
| 106_bl-1 | 106 | CDKN2A                      | MODIFIER; MODERATE | c.194-<br>3537T>G;<br>c.83T>G                                                                 | p.Val28Gly                                               | 1     | FALSE | chr9:2197<br>4744:A:C  | 158:chr9:2<br>1974744:A<br>:C  | 0.079787 |
| 106_bl-1 | 106 | KRAS                        | MODERATE           | c.35G>A                                                                                       | p.Gly12Asp                                               | 11213 | FALSE | chr12:253<br>98284:C:T | 158:chr12:<br>25398284:<br>C:T | 0.017794 |
| 106_bl-1 | 106 | IGF1R                       | MODERATE           | c.3905T>C;<br>c.3908T>C                                                                       | p.Val1302Ala;<br>p.Val1303Ala                            | 0     | FALSE | chr15:995<br>00475:T:C | 158:chr15:<br>99500475:<br>T:C | 0.01497  |
| 80_c4-1  | 80  | EPHA3                       | MODERATE           | c.1234G>A                                                                                     | p.Val412Ile                                              | 0     | FALSE | chr3:8939<br>1168:G:A  | 159:chr3:8<br>9391168:G<br>:A  | 0.003831 |
| 80_c4-1  | 80  | RET                         | MODERATE           | c.1690A>C                                                                                     | p.Thr564Pro                                              | 1     | FALSE | chr10:436<br>08342:A:C | 159:chr10:<br>43608342:<br>A:C | 0.010471 |
| 80_c4-1  | 80  | PIK3CA                      | MODERATE           | c.365G>A                                                                                      | p.Gly122Asp                                              | 2     | FALSE | chr3:1789<br>17490:G:A | 159:chr3:1<br>78917490:<br>G:A | 0.003788 |
| 80_c4-1  | 80  | SMO                         | MODERATE           | c.961G>A                                                                                      | p.Val321Met                                              | 0     | FALSE | chr7:1288<br>46031:G:A | 159:chr7:1<br>28846031:<br>G:A | 0.00335  |
| 80_c4-1  | 80  | ALK                         | MODERATE           | c.4192C>T                                                                                     | p.Pro1398Ser                                             | 1     | FALSE | chr2:2941<br>6761:G:A  | 159:chr2:2<br>9416761:G<br>:A  | 0.004057 |
| 80_c4-1  | 80  | IGF1R                       | MODERATE           | c.3905T>C;<br>c.3908T>C                                                                       | p.Val1302Ala;<br>p.Val1303Ala                            | 0     | FALSE | chr15:995<br>00475:T:C | 159:chr15:<br>99500475:<br>T:C | 0.005445 |
| 80_c4-1  | 80  | IGF1R                       | MODERATE           | c.3934T>C;<br>c.3937T>C                                                                       | p.Ser1312Pro;<br>p.Ser1313Pro                            | 0     | FALSE | chr15:995<br>00504:T:C | 159:chr15:<br>99500504:<br>T:C | 0.010221 |
| 80_c4-1  | 80  | ERBB2                       | MODERATE; MODIFIER | c.101T>C;<br>c.146T>C;<br>c.56T>C;<br>n.407T>C                                                | p.Leu34Pro;<br>p.Leu49Pro;<br>p.Leu19Pro;                | 1     | FALSE | chr17:378<br>63315:T:C | 159:chr17:<br>37863315:<br>T:C | 0.004098 |

|         |    |            |                    |                                                                           |                                                                                                                 |   |       |                        |                                |          |
|---------|----|------------|--------------------|---------------------------------------------------------------------------|-----------------------------------------------------------------------------------------------------------------|---|-------|------------------------|--------------------------------|----------|
| 80_c4-1 | 80 | FGFR1      | MODERATE           | c.487C>T;<br>c.493C>T;<br>c.736C>T;<br>c.754C>T;<br>c.760C>T;<br>c.853C>T | p.Arg163Trp<br>;<br>p.Arg165Trp<br>;<br>p.Arg246Trp<br>;<br>p.Arg252Trp<br>;<br>p.Arg254Trp<br>;<br>p.Arg285Trp | 1 | FALSE | chr8:3828<br>2203:G:A  | 159:chr8:3<br>8282203:G<br>:A  | 0.003854 |
| 80_c4-1 | 80 | EVI2A; NF1 | MODIFIER; MODERATE | c.-266T>G;<br>c.-338T>G;<br>c.5125A>C<br>;<br>c.5188A>C                   | p.Thr1709Pr<br>o;<br>p.Thr1730Pr<br>o                                                                           | 1 | FALSE | chr17:296<br>53190:A:C | 159:chr17:<br>29653190:<br>A:C | 0.006525 |
| 80_c4-1 | 80 | FBXW7      | MODERATE           | c.1028G>T<br>;<br>c.1268G>T<br>;<br>c.914G>T                              | p.Gly343Val;<br>p.Gly423Val;<br>p.Gly305Val                                                                     | 0 | FALSE | chr4:1532<br>49510:C:A | 159:chr4:1<br>53249510:<br>C:A | 0.004065 |
| 80_c4-1 | 80 | NTRK1      | MODERATE           | c.1940T>G<br>;<br>c.2030T>G<br>;<br>c.2048T>G                             | p.Val647Gly;<br>p.Val677Gly;<br>p.Val683Gly                                                                     | 2 | FALSE | chr1:1568<br>49792:T:G | 159:chr1:1<br>56849792:<br>T:G | 0.008    |
| 80_c4-1 | 80 | CDKN2A     | MODIFIER; MODERATE | c.194-<br>3537T>G;<br>c.83T>G                                             | p.Val28Gly                                                                                                      | 1 | FALSE | chr9:2197<br>4744:A:C  | 159:chr9:2<br>1974744:A<br>:C  | 0.076087 |
| 80_c4-1 | 80 | FGFR4      | MODIFIER; MODERATE | c.1058-<br>174G>A;<br>c.1078G>A                                           | p.Ala360Thr                                                                                                     | 1 | FALSE | chr5:1765<br>20159:G:A | 159:chr5:1<br>76520159:<br>G:A | 0.004264 |
| 80_c4-1 | 80 | HGF        | MODERATE           | c.767G>A;<br>c.782G>A                                                     | p.Arg256His<br>;<br>p.Arg261His                                                                                 | 0 | FALSE | chr7:8137<br>2752:C:T  | 159:chr7:8<br>1372752:C<br>:T  | 0.004149 |
| 80_c4-1 | 80 | SMO        | MODERATE           | c.1045A>C                                                                 | p.Thr349Pro                                                                                                     | 0 | FALSE | chr7:1288<br>46115:A:C | 159:chr7:1<br>28846115:<br>A:C | 0.013514 |
| 80_c4-1 | 80 | STK11      | MODERATE           | c.455A>G                                                                  | p.Gln152Arg                                                                                                     | 3 | FALSE | chr19:121<br>9403:A:G  | 159:chr19:<br>1219403:A<br>:G  | 0.005952 |
| 80_c4-1 | 80 | CDH1       | MODERATE           | c.221G>A                                                                  | p.Arg74Gln                                                                                                      | 0 | FALSE | chr16:688<br>35630:G:A | 159:chr16:<br>68835630:<br>G:A | 0.003752 |
| 80_c4-1 | 80 | ERBB2      | MODERATE; MODIFIER | c.560G>A;<br>c.605G>A;<br>c.650G>A;<br>n.974G>A                           | p.Arg187His<br>;<br>p.Arg202His<br>;<br>p.Arg217His<br>;                                                        | 1 | FALSE | chr17:378<br>66345:G:A | 159:chr17:<br>37866345:<br>G:A | 0.004016 |

|         |    |                                 |                    |                                                                                  |                                                                                          |       |       |                        |                                |          |
|---------|----|---------------------------------|--------------------|----------------------------------------------------------------------------------|------------------------------------------------------------------------------------------|-------|-------|------------------------|--------------------------------|----------|
| 80_c4-1 | 80 | CDKN2A                          | MODIFIER; MODERATE | c.194-3546T>G;<br>c.74T>G                                                        | ; p.Val25Gly                                                                             | 2     | FALSE | chr9:2197<br>4753:A:C  | 159:chr9:2<br>1974753:A<br>:C  | 0.177083 |
| 80_c4-1 | 80 | EPHA3                           | MODERATE           | c.2530C>T                                                                        | p.Pro844Ser                                                                              | 0     | FALSE | chr3:8949<br>9360:C:T  | 159:chr3:8<br>9499360:C<br>:T  | 0.003937 |
| 80_c4-1 | 80 | NOTCH1                          | MODERATE           | c.4778T>C                                                                        | p.Leu1593Pro                                                                             | 0     | FALSE | chr9:1393<br>99365:A:G | 159:chr9:1<br>39399365:<br>A:G | 0.005181 |
| 80_c4-1 | 80 | C9orf53;<br>CDKN2A              | MODIFIER; MODERATE | n.*616C>G<br>;<br>c.*140G>C<br>;<br>c.217G>C;<br>c.260G>C                        | ; p.Ala73Pro;<br>p.Arg87Pro                                                              | 1     | FALSE | chr9:2197<br>1141:C:G  | 159:chr9:2<br>1971141:C<br>:G  | 0.015306 |
| 80_c4-1 | 80 | CDKN2A;<br>CDKN2B-<br>AS1       | MODERATE; MODIFIER | c.98A>G;<br>n.-1T>C                                                              | p.Glu33Gly;                                                                              | 1     | FALSE | chr9:2199<br>4233:T:C  | 159:chr9:2<br>1994233:T<br>:C  | 0.019355 |
| 80_c4-1 | 80 | NTRK3                           | MODERATE           | c.2005C>T;<br>c.2029C>T                                                          | p.His669Tyr;<br>p.His677Tyr                                                              | 0     | FALSE | chr15:884<br>72526:G:A | 159:chr15:<br>88472526:<br>G:A | 0.003656 |
| 80_c4-1 | 80 | FOXL2;<br>FOXL2NB;<br>LINC01391 | MODERATE; MODIFIER | c.282T>A;<br>c.-132A>T;<br>n.-1T>A                                               | p.Asn94Lys;                                                                              | 0     | FALSE | chr3:1386<br>65283:A:T | 159:chr3:1<br>38665283:<br>A:T | 0.025707 |
| 74_bl-1 | 74 | FGFR4                           | MODIFIER; MODERATE | c.1058-<br>174G>A;<br>c.1078G>A                                                  | ; p.Ala360Thr                                                                            | 1     | FALSE | chr5:1765<br>20159:G:A | 161:chr5:1<br>76520159:<br>G:A | 0.005714 |
| 74_bl-1 | 74 | NF1                             | MODERATE           | c.1319G>A                                                                        | p.Arg440Gln                                                                              | 1     | FALSE | chr17:295<br>33316:G:A | 161:chr17:<br>29533316:<br>G:A | 0.005405 |
| 74_bl-1 | 74 | ROS1                            | MODERATE           | c.5920G>A                                                                        | p.Glu1974Lys                                                                             | 1     | FALSE | chr6:1176<br>41051:C:T | 161:chr6:1<br>17641051:<br>C:T | 0.005277 |
| 74_bl-1 | 74 | BRAF                            | MODERATE           | c.1799T>A                                                                        | p.Val600Glu                                                                              | 23024 | FALSE | chr7:1404<br>53136:A:T | 161:chr7:1<br>40453136:<br>A:T | 0.00554  |
| 74_bl-1 | 74 | STK11                           | MODERATE           | c.889A>G                                                                         | p.Arg297Gly                                                                              | 1     | FALSE | chr19:122<br>1974:A:G  | 161:chr19:<br>1221974:A<br>:G  | 0.010417 |
| 74_bl-1 | 74 | MITF                            | MODIFIER; MODERATE | c.93+115G<br>>A;<br>c.208G>A;<br>c.373G>A;<br>c.481G>A;<br>c.526G>A;<br>c.529G>A | ; p.Ala70Thr;<br>p.Ala125Thr<br>;<br>p.Ala161Thr<br>;<br>p.Ala176Thr<br>;<br>p.Ala177Thr | 0     | FALSE | chr3:6998<br>7147:G:A  | 161:chr3:6<br>9987147:G<br>:A  | 0.005391 |
| 74_bl-1 | 74 | KDR                             | MODERATE           | c.241G>A                                                                         | p.Asp81Asn                                                                               | 2     | FALSE | chr4:5598<br>4888:C:T  | 161:chr4:5<br>5984888:C<br>:T  | 0.005128 |



|         |    |                                 |                    |                                                                                 |                                                                                             |   |       |                        |                                |          |
|---------|----|---------------------------------|--------------------|---------------------------------------------------------------------------------|---------------------------------------------------------------------------------------------|---|-------|------------------------|--------------------------------|----------|
| 74_bl-1 | 74 | FOXL2;<br>FOXL2NB;<br>LINC01391 | MODERATE; MODIFIER | c.282T>A;<br>c.-132A>T;<br>n.-1T>A                                              | p.Asn94Lys;                                                                                 | 0 | FALSE | chr3:1386<br>65283:A:T | 161:chr3:1<br>38665283:<br>A:T | 0.068627 |
| 74_bl-1 | 74 | TP53                            | MODERATE           | c.127C>T;<br>c.208C>T;<br>c.487C>T;<br>c.604C>T                                 | p.Arg43Cys;<br>p.Arg70Cys;<br>p.Arg163Cys<br>;<br>p.Arg202Cys                               | 6 | FALSE | chr17:757<br>8245:G:A  | 161:chr17:<br>7578245:G<br>:A  | 0.005333 |
| 74_bl-1 | 74 | NTRK1                           | MODERATE           | c.1669C>T;<br>c.1759C>T;<br>c.1777C>T                                           | p.Arg557Trp<br>;<br>p.Arg587Trp<br>;<br>p.Arg593Trp                                         | 1 | FALSE | chr1:1568<br>46336:C:T | 161:chr1:1<br>56846336:<br>C:T | 0.006309 |
| 74_bl-1 | 74 | CDKN2A                          | MODIFIER; MODERATE | c.194-<br>3546T>G;<br>c.74T>G                                                   | ; p.Val25Gly                                                                                | 2 | FALSE | chr9:2197<br>4753:A:C  | 161:chr9:2<br>1974753:A<br>:C  | 0.215    |
| 74_bl-1 | 74 | IGF1R                           | MODERATE           | c.3934T>C;<br>c.3937T>C                                                         | p.Ser1312Pro;<br>p.Ser1313Pro                                                               | 0 | FALSE | chr15:995<br>00504:T:C | 161:chr15:<br>99500504:<br>T:C | 0.023599 |
| 74_bl-1 | 74 | CDKN2A                          | MODIFIER; MODERATE | c.194-<br>3537T>G;<br>c.83T>G                                                   | ; p.Val28Gly                                                                                | 1 | FALSE | chr9:2197<br>4744:A:C  | 161:chr9:2<br>1974744:A<br>:C  | 0.069364 |
| 76_bl-b | 76 | TSC1                            | MODERATE           | c.1547C>T;<br>c.1697C>T;<br>c.1700C>T                                           | p.Ala516Val;<br>p.Ala566Val;<br>p.Ala567Val                                                 | 0 | FALSE | chr9:1357<br>81265:G:A | 166:chr9:1<br>35781265:<br>G:A | 0.005277 |
| 76_bl-b | 76 | BRAF                            | MODERATE           | c.929C>T                                                                        | p.Thr310Ile                                                                                 | 1 | FALSE | chr7:1405<br>00213:G:A | 166:chr7:1<br>40500213:<br>G:A | 0.005038 |
| 76_bl-b | 76 | RET                             | MODERATE           | c.1907C>T                                                                       | p.Thr636Met                                                                                 | 1 | FALSE | chr10:436<br>09955:C:T | 166:chr10:<br>43609955:<br>C:T | 0.004515 |
| 76_bl-b | 76 | BRAF                            | MODERATE           | c.2044C>T                                                                       | p.Arg682Trp                                                                                 | 1 | FALSE | chr7:1404<br>39695:G:A | 166:chr7:1<br>40439695:<br>G:A | 0.005141 |
| 76_bl-b | 76 | FGFR1                           | MODERATE           | c.1211C>T;<br>c.1217C>T;<br>c.1454C>T;<br>c.1478C>T;<br>c.1484C>T;<br>c.1577C>T | p.Ala404Val;<br>p.Ala406Val;<br>p.Ala485Val;<br>p.Ala493Val;<br>p.Ala495Val;<br>p.Ala526Val | 1 | FALSE | chr8:3827<br>5456:G:A  | 166:chr8:3<br>8275456:G<br>:A  | 0.004854 |

|          |    |                    |                            |                                                           |                                 |   |       |                        |                                |          |
|----------|----|--------------------|----------------------------|-----------------------------------------------------------|---------------------------------|---|-------|------------------------|--------------------------------|----------|
| 76_bl-b  | 76 | EV12A; NF1         | MODIFIER; MODERATE         | c.-266G>A;<br>c.-338G>A;<br>c.5020C>T;<br>c.5083C>T       | ; p.Arg1674Trp;<br>p.Arg1695Trp | 1 | FALSE | chr17:296<br>53085:C:T | 166:chr17:<br>29653085:<br>C:T | 0.004796 |
| 76_bl-b  | 76 | FGFR4              | MODIFIER; MODERATE         | c.1193+43<br>C>T;<br>c.1270C>T;<br>c.1390C>T              | ; p.Arg424Trp;<br>p.Arg464Trp   | 1 | FALSE | chr5:1765<br>20545:C:T | 166:chr5:1<br>76520545:<br>C:T | 0.007273 |
| 16_pro-1 | 16 | NTRK1              | MODERATE                   | c.804C>G;<br>c.894C>G                                     | p.His268Gln;<br>p.His298Gln     | 1 | FALSE | chr1:1568<br>43468:C:G | 167:chr1:1<br>56843468:<br>C:G | 0.002193 |
| 16_pro-1 | 16 | IDH1               | MODERATE                   | c.299G>T                                                  | p.Arg100Leu                     | 5 | FALSE | chr2:2091<br>13208:C:A | 167:chr2:2<br>09113208:<br>C:A | 0.001649 |
| 16_pro-1 | 16 | CWH43              | MODERATE                   | c.1532C>T;<br>c.1613C>T                                   | p.Ser511Leu;<br>p.Ser538Leu     | 0 | FALSE | chr4:4903<br>4687:C:T  | 167:chr4:4<br>9034687:C<br>:T  | 0.001493 |
| 16_pro-1 | 16 | NF1                | MODERATE                   | c.3748C>T                                                 | p.Arg1250Trp                    | 1 | FALSE | chr17:295<br>62668:C:T | 167:chr17:<br>29562668:<br>C:T | 0.001486 |
| 16_pro-1 | 16 | C9orf53;<br>CDKN2A | MODIFIER; MODERATE;<br>LOW | n.*616G>A;<br>;<br>c.*102C>T;<br>c.179C>T;<br>c.222C>T    | ; p.Ala60Val;<br>p.Gly74Gly     | 2 | FALSE | chr9:2197<br>1179:G:A  | 167:chr9:2<br>1971179:G<br>:A  | 0.003091 |
| 16_pro-1 | 16 | HOXD-AS2;<br>HOXD8 | MODIFIER; MODERATE         | n.*692G>T<br>; c.22C>A;<br>c.574C>A                       | ; p.Gln8Lys;<br>p.Gln192Lys     | 0 | FALSE | chr2:1769<br>95668:C:A | 167:chr2:1<br>76995668:<br>C:A | 0.002278 |
| 16_pro-1 | 16 | HRAS;<br>LRRC56    | MODERATE; MODIFIER         | c.175G>A;<br>c.-506C>T                                    | p.Ala59Thr;                     | 2 | FALSE | chr11:533<br>881:C:T   | 167:chr11:<br>533881:C:<br>T   | 0.001934 |
| 16_pro-1 | 16 | NTRK2              | MODERATE                   | c.1318C>A<br>;<br>c.1357C>A                               | p.Leu440Met;<br>p.Leu453Met     | 0 | FALSE | chr9:8736<br>6961:C:A  | 167:chr9:8<br>7366961:C<br>:A  | 0.001691 |
| 16_pro-1 | 16 | C9orf53;<br>CDKN2A | MODIFIER; MODERATE;<br>LOW | n.*616T>G<br>;<br>c.*120A>C<br>;<br>c.197A>C;<br>c.240A>C | ; p.His66Pro;<br>p.Pro80Pro     | 1 | FALSE | chr9:2197<br>1161:T:G  | 167:chr9:2<br>1971161:T<br>:G  | 0.02995  |
| 16_pro-1 | 16 | NOTCH1             | MODERATE                   | c.4733T>G                                                 | p.Val1578Gly                    | 0 | FALSE | chr9:1393<br>99410:A:C | 167:chr9:1<br>39399410:<br>A:C | 0.004415 |
| 16_pro-1 | 16 | NF1                | MODERATE                   | c.2695T>G                                                 | p.Leu899Val                     | 3 | FALSE | chr17:295<br>56328:T:G | 167:chr17:<br>29556328:<br>T:G | 0.002602 |

|          |    |                 |                    |                                                                                                                                                                                    |                                                                                                                 |       |       |                    |                        |          |
|----------|----|-----------------|--------------------|------------------------------------------------------------------------------------------------------------------------------------------------------------------------------------|-----------------------------------------------------------------------------------------------------------------|-------|-------|--------------------|------------------------|----------|
| 16_pro-1 | 16 | NTRK2           | MODERATE           | c.1960C>A<br>;<br>c.2008C>A                                                                                                                                                        | p.Leu654Met;<br>p.Leu670Met                                                                                     | 0     | FALSE | chr9:87570268:C:A  | 167:chr9:87570268:C:A  | 0.001833 |
| 16_pro-1 | 16 | CTNNB1          | HIGH               | c.283C>T                                                                                                                                                                           | p.Arg95*                                                                                                        | 0     | FALSE | chr3:41266486:C:T  | 167:chr3:41266486:C:T  | 0.001475 |
| 16_pro-1 | 16 | NOTCH1          | MODERATE           | c.3407G>T                                                                                                                                                                          | p.Gly1136Val                                                                                                    | 0     | FALSE | chr9:139402510:C:A | 167:chr9:139402510:C:A | 0.00202  |
| 16_pro-1 | 16 | BRAF            | HIGH               | c.532C>T                                                                                                                                                                           | p.Arg178*                                                                                                       | 1     | FALSE | chr7:140508768:G:A | 167:chr7:140508768:G:A | 0.001584 |
| 16_pro-1 | 16 | SMO             | MODERATE           | c.961G>A                                                                                                                                                                           | p.Val321Met                                                                                                     | 0     | FALSE | chr7:128846031:G:A | 167:chr7:128846031:G:A | 0.001616 |
| 16_pro-1 | 16 | NOTCH1          | MODERATE           | c.4571C>T                                                                                                                                                                          | p.Ala1524Val                                                                                                    | 0     | FALSE | chr9:139399777:G:A | 167:chr9:139399777:G:A | 0.001859 |
| 16_pro-1 | 16 | KRAS            | MODERATE           | c.35G>A                                                                                                                                                                            | p.Gly12Asp                                                                                                      | 11213 | FALSE | chr12:25398284:C:T | 167:chr12:25398284:C:T | 0.020134 |
| 16_pro-1 | 16 | MITF            | MODIFIER; MODERATE | c.93+61C>T;<br>c.154C>T;<br>c.319C>T;<br>c.427C>T;<br>c.472C>T;<br>c.475C>T                                                                                                        | p.Pro52Ser;<br>p.Pro107Ser;<br>p.Pro143Ser;<br>p.Pro158Ser;<br>p.Pro159Ser                                      | 0     | FALSE | chr3:69987093:C:T  | 167:chr3:69987093:C:T  | 0.001626 |
| 16_pro-1 | 16 | FGFR1;<br>LETM2 | MODERATE; MODIFIER | c.1777T>G<br>;<br>c.1783T>G<br>;<br>c.2020T>G<br>;<br>c.2044T>G<br>;<br>c.2050T>G<br>;<br>c.2143T>G<br>;<br>c.*1406A>C;<br>c.*1423A>C;<br>c.*1553A>C;<br>c.*1567A>C;<br>c.*1638A>C | p.Trp593Gly<br>;<br>p.Trp595Gly<br>;<br>p.Trp674Gly<br>;<br>p.Trp682Gly<br>;<br>p.Trp684Gly<br>;<br>p.Trp715Gly | 1     | FALSE | chr8:38271806:A:C  | 167:chr8:38271806:A:C  | 0.003241 |
| 16_pro-1 | 16 | PTEN            | MODERATE           | c.392C>A                                                                                                                                                                           | p.Thr131Asn                                                                                                     | 2     | FALSE | chr10:89692908:C:A | 167:chr10:89692908:C:A | 0.002317 |
| 16_pro-1 | 16 | RET             | MODERATE           | c.1690A>C                                                                                                                                                                          | p.Thr564Pro                                                                                                     | 1     | FALSE | chr10:43608342:A:C | 167:chr10:43608342:A:C | 0.00321  |

|         |    |                    |                    |                                                      |                                                     |   |       |                        |                                |          |
|---------|----|--------------------|--------------------|------------------------------------------------------|-----------------------------------------------------|---|-------|------------------------|--------------------------------|----------|
| 45_bl-2 | 45 | CDH1               | HIGH               | c.1792C>T                                            | p.Arg598*                                           | 0 | FALSE | chr16:688<br>55984:C:T | 169:chr16:<br>68855984:<br>C:T | 0.001318 |
| 45_bl-2 | 45 | NTRK2              | MODERATE           | c.770C>T                                             | p.Ser257Phe                                         | 0 | FALSE | chr9:8733<br>9188:C:T  | 169:chr9:8<br>7339188:C<br>:T  | 0.001503 |
| 45_bl-2 | 45 | PDGFRA             | MODERATE           | c.2465G>A                                            | p.Arg822His                                         | 3 | FALSE | chr4:5515<br>2033:G:A  | 169:chr4:5<br>5152033:G<br>:A  | 0.001642 |
| 45_bl-2 | 45 | FLT3               | MODERATE           | c.1160G>A                                            | p.Arg387Gln                                         | 0 | FALSE | chr13:286<br>22457:C:T | 169:chr13:<br>28622457:<br>C:T | 0.002915 |
| 45_bl-2 | 45 | NTRK1              | MODERATE           | c.821C>T;<br>c.911C>T                                | p.Ser274Phe<br>;<br>p.Ser304Phe                     | 1 | FALSE | chr1:1568<br>43485:C:T | 169:chr1:1<br>56843485:<br>C:T | 0.001762 |
| 45_bl-2 | 45 | MET                | MODERATE           | c.2980G>A<br>;<br>c.3034G>A                          | p.Glu994Lys<br>;<br>p.Glu1012Lys                    | 1 | FALSE | chr7:1164<br>11995:G:A | 169:chr7:1<br>16411995:<br>G:A | 0.001449 |
| 45_bl-2 | 45 | PDGFRA             | MODERATE           | c.685G>A                                             | p.Glu229Lys                                         | 3 | FALSE | chr4:5513<br>1142:G:A  | 169:chr4:5<br>5131142:G<br>:A  | 0.001335 |
| 45_bl-2 | 45 | NF1                | HIGH               | c.5817C>A<br>;<br>c.5880C>A                          | p.Cys1939*;<br>p.Cys1960*                           | 1 | FALSE | chr17:296<br>61923:C:A | 169:chr17:<br>29661923:<br>C:A | 0.001787 |
| 45_bl-2 | 45 | NF1                | MODERATE           | c.7381G>A<br>;<br>c.7444G>A                          | p.Asp2461A<br>sn;<br>p.Asp2482A<br>sn               | 1 | FALSE | chr17:296<br>77323:G:A | 169:chr17:<br>29677323:<br>G:A | 0.001729 |
| 45_bl-2 | 45 | NTRK2              | MODERATE           | c.2023C>T;<br>c.2071C>T                              | p.Arg675Cys<br>;<br>p.Arg691Cys                     | 0 | FALSE | chr9:8757<br>0331:C:T  | 169:chr9:8<br>7570331:C<br>:T  | 0.001699 |
| 45_bl-2 | 45 | TSC1               | MODERATE           | c.2272G>A<br>;<br>c.2422G>A<br>;<br>c.2425G>A        | p.Glu758Lys<br>;<br>p.Glu808Lys<br>;<br>p.Glu809Lys | 0 | FALSE | chr9:1357<br>77053:C:T | 169:chr9:1<br>35777053:<br>C:T | 0.002055 |
| 45_bl-2 | 45 | NTRK3              | MODERATE           | c.1368G>A<br>;<br>c.1392G>A                          | p.Met456Ile<br>;<br>p.Met464Ile                     | 0 | FALSE | chr15:886<br>69506:C:T | 169:chr15:<br>88669506:<br>C:T | 0.001661 |
| 45_bl-2 | 45 | ROS1               | MODERATE           | c.5920G>A                                            | p.Glu1974Lys                                        | 1 | FALSE | chr6:1176<br>41051:C:T | 169:chr6:1<br>17641051:<br>C:T | 0.001695 |
| 45_bl-2 | 45 | PIK3CA             | MODERATE           | c.3142C>T                                            | p.His1048Tyr                                        | 2 | FALSE | chr3:1789<br>52087:C:T | 169:chr3:1<br>78952087:<br>C:T | 0.002216 |
| 45_bl-2 | 45 | RET                | MODERATE           | c.1894G>A                                            | p.Glu632Lys                                         | 1 | FALSE | chr10:436<br>09942:G:A | 169:chr10:<br>43609942:<br>G:A | 0.001279 |
| 45_bl-2 | 45 | HOXD-AS2;<br>HOXD8 | MODIFIER; MODERATE | n.*692C>T<br>;<br>c.304G>A;<br>c.853G>A;<br>c.856G>A | p.Glu102Lys<br>;<br>p.Glu285Lys<br>;<br>p.Glu286Lys | 0 | FALSE | chr2:1769<br>96323:G:A | 169:chr2:1<br>76996323:<br>G:A | 0.00132  |

|         |    |                             |                    |                                                                                                                  |                                                         |    |       |                     |                         |          |
|---------|----|-----------------------------|--------------------|------------------------------------------------------------------------------------------------------------------|---------------------------------------------------------|----|-------|---------------------|-------------------------|----------|
| 45_bl-2 | 45 | ERBB2;<br>MIEN1;<br>MIR4728 | MODIFIER; MODERATE | c.3160-319G>A;<br>c.3145G>A<br>;<br>c.3190G>A<br>;<br>c.3235G>A<br>;<br>n.3559G>A<br>;<br>c.*388C>T;<br>n.*67G>A | p.Glu1049Lys;<br>p.Glu1064Lys;<br>p.Glu1079Lys          | 1  | FALSE | chr17:37883623:G:A  | 169:chr17:37883623:G:A  | 0.001759 |
| 45_bl-2 | 45 | ATM                         | HIGH               | c.3382C>T                                                                                                        | p.Gln1128*                                              | 0  | FALSE | chr11:108150315:C:T | 169:chr11:108150315:C:T | 0.001366 |
| 45_bl-2 | 45 | KDR                         | MODERATE           | c.3065G>A                                                                                                        | p.Arg1022Gln                                            | 1  | FALSE | chr4:55958788:C:T   | 169:chr4:55958788:C:T   | 0.001509 |
| 45_bl-2 | 45 | APC                         | MODERATE           | c.851G>A;<br>c.905G>A                                                                                            | p.Arg284Gln<br>p.Arg302Gln                              | 0  | FALSE | chr5:112151262:G:A  | 169:chr5:112151262:G:A  | 0.0015   |
| 45_bl-2 | 45 | ATM                         | HIGH               | c.5188C>T                                                                                                        | p.Arg1730*                                              | 0  | FALSE | chr11:108172385:C:T | 169:chr11:108172385:C:T | 0.001847 |
| 45_bl-2 | 45 | KDR                         | MODERATE           | c.1168G>A                                                                                                        | p.Glu390Lys                                             | 2  | FALSE | chr4:55976657:C:T   | 169:chr4:55976657:C:T   | 0.002096 |
| 45_bl-2 | 45 | ALK                         | MODERATE           | c.3599C>T                                                                                                        | p.Ala1200Val                                            | 2  | FALSE | chr2:29443618:G:A   | 169:chr2:29443618:G:A   | 0.002667 |
| 45_bl-2 | 45 | KIT                         | MODERATE           | c.682G>A                                                                                                         | p.Glu228Lys                                             | 1  | FALSE | chr4:55565858:G:A   | 169:chr4:55565858:G:A   | 0.001684 |
| 45_bl-2 | 45 | TP53                        | MODERATE           | c.107A>G;<br>c.26A>G;<br>c.386A>G;<br>c.503A>G                                                                   | p.His36Arg;<br>p.His9Arg;<br>p.His129Arg<br>p.His168Arg | 15 | FALSE | chr17:7578427:T:C   | 169:chr17:7578427:T:C   | 0.001771 |
| 45_bl-2 | 45 | NF1                         | MODIFIER; HIGH     | c.*2165G>A;<br>c.2088G>A                                                                                         | p.Trp696*                                               | 1  | FALSE | chr17:29553539:G:A  | 169:chr17:29553539:G:A  | 0.00239  |
| 45_bl-2 | 45 | ATM                         | MODERATE           | c.7328G>A                                                                                                        | p.Arg2443Gln                                            | 0  | FALSE | chr11:108200961:G:A | 169:chr11:108200961:G:A | 0.002974 |
| 45_bl-2 | 45 | PIK3CA                      | MODERATE           | c.3133G>A                                                                                                        | p.Asp1045Asn                                            | 6  | FALSE | chr3:178952078:G:A  | 169:chr3:178952078:G:A  | 0.00142  |
| 45_bl-2 | 45 | TP53                        | MODIFIER; MODERATE | c.-5G>T;<br>c.356G>T;<br>c.473G>T;<br>c.77G>T                                                                    | p.Arg119Leu<br>p.Arg158Leu<br>p.Arg26Leu                | 80 | FALSE | chr17:7578457:C:A   | 169:chr17:7578457:C:A   | 0.001808 |

|         |    |        |                    |                                                 |                                                             |    |       |                     |                         |          |
|---------|----|--------|--------------------|-------------------------------------------------|-------------------------------------------------------------|----|-------|---------------------|-------------------------|----------|
| 45_bl-2 | 45 | TP53   | MODERATE           | c.298G>A;<br>c.379G>A;<br>c.658G>A;<br>c.775G>A | p.Asp100Asn;<br>p.Asp127Asn;<br>p.Asp220Asn;<br>p.Asp259Asn | 23 | FALSE | chr17:7577506:C:T   | 169:chr17:7577506:C:T   | 0.001597 |
| 45_bl-2 | 45 | ATM    | MODERATE           | c.743G>A                                        | p.Arg248Gln                                                 | 0  | FALSE | chr11:108115595:G:A | 169:chr11:108115595:G:A | 0.001343 |
| 45_bl-2 | 45 | NF1    | MODERATE           | c.1319G>A                                       | p.Arg440Gln                                                 | 1  | FALSE | chr17:29533316:G:A  | 169:chr17:29533316:G:A  | 0.002412 |
| 45_bl-2 | 45 | EGFR   | MODERATE           | c.844G>A                                        | p.Glu282Lys                                                 | 1  | FALSE | chr7:55221800:G:A   | 169:chr7:55221800:G:A   | 0.001552 |
| 45_bl-2 | 45 | NTRK1  | MODERATE           | c.1129G>A;<br>c.1219G>A;<br>c.1237G>A           | p.Glu377Lys;<br>p.Glu407Lys;<br>p.Glu413Lys                 | 1  | FALSE | chr1:156844404:G:A  | 169:chr1:156844404:G:A  | 0.002063 |
| 45_bl-2 | 45 | CTNNB1 | MODERATE           | c.121A>T                                        | p.Thr41Ser                                                  | 0  | FALSE | chr3:41266124:A:T   | 169:chr3:41266124:A:T   | 0.0015   |
| 45_bl-2 | 45 | EGFR   | MODERATE           | c.988G>A                                        | p.Glu330Lys                                                 | 1  | FALSE | chr7:55223621:G:A   | 169:chr7:55223621:G:A   | 0.002469 |
| 45_bl-2 | 45 | NF1    | HIGH               | c.1318C>T                                       | p.Arg440*                                                   | 10 | FALSE | chr17:29533315:C:T  | 169:chr17:29533315:C:T  | 0.003215 |
| 45_bl-2 | 45 | ATM    | HIGH               | c.5623C>T                                       | p.Arg1875*                                                  | 0  | FALSE | chr11:108175528:C:T | 169:chr11:108175528:C:T | 0.002593 |
| 45_bl-2 | 45 | VHL    | MODIFIER; MODERATE | c.341-3271C>T;<br>c.343C>T                      | p.His115Tyr                                                 | 0  | FALSE | chr3:10188200:C:T   | 169:chr3:10188200:C:T   | 0.001753 |
| 45_bl-2 | 45 | EPHA3  | MODERATE           | c.2408C>T                                       | p.Ser803Leu                                                 | 0  | FALSE | chr3:89498436:C:T   | 169:chr3:89498436:C:T   | 0.001546 |
| 45_bl-2 | 45 | CTNNB1 | MODERATE           | c.1604G>A                                       | p.Arg535Gln                                                 | 0  | FALSE | chr3:41275709:G:A   | 169:chr3:41275709:G:A   | 0.001641 |
| 45_bl-2 | 45 | IGF1R  | MODERATE           | c.2380C>T                                       | p.Arg794Trp                                                 | 0  | FALSE | chr15:99465555:C:T  | 169:chr15:99465555:C:T  | 0.001461 |
| 45_bl-2 | 45 | ALK    | MODERATE           | c.1588G>A                                       | p.Glu530Lys                                                 | 1  | FALSE | chr2:29541229:C:T   | 169:chr2:29541229:C:T   | 0.002708 |
| 45_bl-2 | 45 | PDGFRA | MODERATE           | c.421G>A                                        | p.Glu141Lys                                                 | 1  | FALSE | chr4:55129887:G:A   | 169:chr4:55129887:G:A   | 0.001521 |
| 45_bl-2 | 45 | MAP2K1 | MODERATE           | c.140G>A                                        | p.Arg47Gln                                                  | 4  | FALSE | chr15:66727424:G:A  | 169:chr15:66727424:G:A  | 0.001457 |

|         |    |       |                    |                                                                     |                                                                         |     |       |                             |                                 |          |
|---------|----|-------|--------------------|---------------------------------------------------------------------|-------------------------------------------------------------------------|-----|-------|-----------------------------|---------------------------------|----------|
| 45_bl-2 | 45 | TP53  | MODERATE           | c.367C>T;<br>c.448C>T;<br>c.727C>T;<br>c.844C>T                     | p.Arg123Trp<br>;<br>p.Arg150Trp<br>;<br>p.Arg243Trp<br>;<br>p.Arg282Trp | 479 | FALSE | chr17:757<br>7094:G:A       | 169:chr17:<br>7577094:G<br>:A   | 0.005824 |
| 45_bl-2 | 45 | NF1   | MODERATE           | c.1247G>A                                                           | p.Arg416Gln                                                             | 1   | FALSE | chr17:295<br>28490:G:A      | 169:chr17:<br>29528490:<br>G:A  | 0.002051 |
| 45_bl-2 | 45 | FGFR2 | MODIFIER; MODERATE | c.110-<br>13073G>A;<br>n.757-<br>13073G>A;<br>c.157G>A;<br>c.424G>A | p.Asp53Asn;<br>p.Asp142As<br>n                                          | 1   | FALSE | chr10:123<br>324046:C:<br>T | 169:chr10:<br>12332404<br>6:C:T | 0.001676 |
| 45_bl-2 | 45 | NTRK3 | MODERATE           | c.1351C>T;<br>c.1375C>T                                             | p.Arg451Trp<br>;<br>p.Arg459Trp                                         | 0   | FALSE | chr15:886<br>69523:G:A      | 169:chr15:<br>88669523:<br>G:A  | 0.001574 |
| 45_bl-2 | 45 | FBXW7 | MODERATE           | c.1204G>A<br>;<br>c.1318G>A<br>;<br>c.1558G>A                       | p.Asp402As<br>n;<br>p.Asp440As<br>n;<br>p.Asp520As<br>n                 | 0   | FALSE | chr4:1532<br>47244:C:T      | 169:chr4:1<br>53247244:<br>C:T  | 0.001409 |
| 45_bl-2 | 45 | TP53  | MODIFIER; MODERATE | c.-9G>T;<br>c.352G>T;<br>c.469G>T;<br>c.73G>T                       | p.Val118Phe<br>;<br>p.Val157Phe<br>;<br>p.Val25Phe                      | 169 | FALSE | chr17:757<br>8461:C:A       | 169:chr17:<br>7578461:C<br>:A   | 0.001781 |
| 45_bl-2 | 45 | SMO   | MODERATE           | c.1045A>C                                                           | p.Thr349Pro                                                             | 0   | FALSE | chr7:1288<br>46115:A:C      | 169:chr7:1<br>28846115:<br>A:C  | 0.001419 |
| 45_bl-2 | 45 | CWH43 | MODERATE           | c.1907G>A<br>;<br>c.1988G>A                                         | p.Arg636Lys<br>;<br>p.Arg663Lys                                         | 0   | FALSE | chr4:4905<br>2833:G:A       | 169:chr4:4<br>9052833:G<br>:A   | 0.001935 |
| 45_bl-2 | 45 | DDR2  | HIGH               | c.2258G>A                                                           | p.Trp753*                                                               | 1   | FALSE | chr1:1627<br>46135:G:A      | 169:chr1:1<br>62746135:<br>G:A  | 0.001939 |
| 45_bl-2 | 45 | TP53  | MODERATE           | c.128G>T;<br>c.209G>T;<br>c.488G>T;<br>c.605G>T                     | p.Arg43Leu;<br>p.Arg70Leu;<br>p.Arg163Leu<br>;<br>p.Arg202Leu           | 4   | FALSE | chr17:757<br>8244:C:A       | 169:chr17:<br>7578244:C<br>:A   | 0.001718 |
| 45_bl-2 | 45 | CWH43 | MODERATE           | c.1972G>A<br>;<br>c.2053G>A                                         | p.Glu658Lys<br>;<br>p.Glu685Lys                                         | 0   | FALSE | chr4:4906<br>3860:G:A       | 169:chr4:4<br>9063860:G<br>:A   | 0.001629 |
| 45_bl-2 | 45 | EPHA3 | MODERATE           | c.2288C>T                                                           | p.Ser763Phe                                                             | 0   | FALSE | chr3:8948<br>0451:C:T       | 169:chr3:8<br>9480451:C<br>:T   | 0.001466 |

|         |    |       |                    |                                                       |                                                        |    |       |                        |                                |          |
|---------|----|-------|--------------------|-------------------------------------------------------|--------------------------------------------------------|----|-------|------------------------|--------------------------------|----------|
| 45_bl-2 | 45 | BRAF  | MODERATE           | c.1394C>T                                             | p.Ser465Phe                                            | 1  | FALSE | chr7:1404<br>81414:G:A | 169:chr7:1<br>40481414:<br>G:A | 0.001496 |
| 45_bl-2 | 45 | CWH43 | MODERATE           | c.1273C>T;<br>c.1354C>T                               | p.His425Tyr;<br>p.His452Tyr                            | 0  | FALSE | chr4:4903<br>0733:C:T  | 169:chr4:4<br>9030733:C<br>:T  | 0.001504 |
| 45_bl-2 | 45 | NF1   | MODERATE           | c.5692G>A<br>;<br>c.5755G>A                           | p.Glu1898Ly<br>s;<br>p.Glu1919Ly<br>s                  | 1  | FALSE | chr17:296<br>57459:G:A | 169:chr17:<br>29657459:<br>G:A | 0.001577 |
| 45_bl-2 | 45 | MITF  | MODERATE           | c.130C>T;<br>c.175C>T;<br>c.178C>T;<br>c.22C>T        | p.Arg44Cys;<br>p.Arg59Cys;<br>p.Arg60Cys;<br>p.Arg8Cys | 0  | FALSE | chr3:6992<br>8358:C:T  | 169:chr3:6<br>9928358:C<br>:T  | 0.001471 |
| 45_bl-2 | 45 | KDR   | MODERATE           | c.3311C>T                                             | p.Ser1104Ph<br>e                                       | 1  | FALSE | chr4:5595<br>5634:G:A  | 169:chr4:5<br>5955634:G<br>:A  | 0.001516 |
| 45_bl-2 | 45 | NRAS  | MODERATE           | c.317C>T                                              | p.Ser106Leu                                            | 1  | FALSE | chr1:1152<br>52323:G:A | 169:chr1:1<br>15252323:<br>G:A | 0.002555 |
| 45_bl-2 | 45 | IGF1R | MODERATE           | c.3821G>A<br>;<br>c.3824G>A                           | p.Arg1274Gl<br>n;<br>p.Arg1275Gl<br>n                  | 0  | FALSE | chr15:995<br>00391:G:A | 169:chr15:<br>99500391:<br>G:A | 0.001536 |
| 45_bl-2 | 45 | NF1   | MODERATE           | c.859G>A                                              | p.Asp287As<br>n                                        | 1  | FALSE | chr17:295<br>09654:G:A | 169:chr17:<br>29509654:<br>G:A | 0.001682 |
| 45_bl-2 | 45 | KIT   | MODERATE           | c.1156G>A                                             | p.Glu386Lys                                            | 1  | FALSE | chr4:5557<br>5630:G:A  | 169:chr4:5<br>5575630:G<br>:A  | 0.002264 |
| 45_bl-2 | 45 | ALK   | MODERATE           | c.1801C>T                                             | p.Leu601Ph<br>e                                        | 1  | FALSE | chr2:2951<br>9770:G:A  | 169:chr2:2<br>9519770:G<br>:A  | 0.00137  |
| 45_bl-2 | 45 | ROS1  | MODERATE           | c.5782C>T                                             | p.Leu1928P<br>he                                       | 1  | FALSE | chr6:1176<br>41189:G:A | 169:chr6:1<br>17641189:<br>G:A | 0.002408 |
| 45_bl-2 | 45 | FGFR3 | MODIFIER; MODERATE | c.931-<br>432G>A;<br>;<br>c.1138G>A<br>;<br>c.1144G>A | p.Gly380Arg<br>;<br>p.Gly382Arg                        | 13 | FALSE | chr4:1806<br>119:G:A   | 169:chr4:1<br>806119:G:<br>A   | 0.001947 |
| 45_bl-2 | 45 | PTEN  | MODERATE           | c.1123G>A                                             | p.Asp375As<br>n                                        | 3  | FALSE | chr10:897<br>25140:G:A | 169:chr10:<br>89725140:<br>G:A | 0.002516 |
| 45_bl-2 | 45 | KDR   | MODERATE           | c.3062C>T                                             | p.Ser1021Le<br>u                                       | 1  | FALSE | chr4:5595<br>8791:G:A  | 169:chr4:5<br>5958791:G<br>:A  | 0.001497 |
| 45_bl-2 | 45 | KIT   | MODERATE           | c.1726C>T;<br>c.1738C>T                               | p.His576Tyr;<br>p.His580Tyr                            | 2  | FALSE | chr4:5559<br>3672:C:T  | 169:chr4:5<br>5593672:C<br>:T  | 0.002147 |
| 45_bl-2 | 45 | NF1   | MODERATE           | c.1339C>T                                             | p.Leu447Ph<br>e                                        | 1  | FALSE | chr17:295<br>33336:C:T | 169:chr17:<br>29533336:<br>C:T | 0.001781 |
| 45_bl-2 | 45 | RET   | MODERATE           | c.1690A>C                                             | p.Thr564Pro                                            | 1  | FALSE | chr10:436<br>08342:A:C | 169:chr10:<br>43608342:<br>A:C | 0.00148  |



|         |    |        |                    |                                                                              |                                                                            |    |       |                     |                         |          |
|---------|----|--------|--------------------|------------------------------------------------------------------------------|----------------------------------------------------------------------------|----|-------|---------------------|-------------------------|----------|
| 45_bl-2 | 45 | ATM    | MODERATE           | c.1010G>A                                                                    | p.Arg337His                                                                | 0  | FALSE | chr11:108117799:G:A | 169:chr11:108117799:G:A | 0.001345 |
| 45_bl-2 | 45 | KIT    | MODERATE           | c.1669G>A;<br>c.1681G>A                                                      | p.Glu557Lys;<br>p.Glu561Lys                                                | 6  | FALSE | chr4:55593615:G:A   | 169:chr4:55593615:G:A   | 0.001635 |
| 45_bl-2 | 45 | PIK3CA | MODERATE           | c.772G>A                                                                     | p.Asp258Asn                                                                | 1  | FALSE | chr3:178919287:G:A  | 169:chr3:178919287:G:A  | 0.001451 |
| 45_bl-2 | 45 | PTEN   | MODERATE           | c.295G>A                                                                     | p.Glu99Lys                                                                 | 3  | FALSE | chr10:89692811:G:A  | 169:chr10:89692811:G:A  | 0.001667 |
| 45_bl-2 | 45 | FBXW7  | HIGH               | c.1081C>T;<br>c.1195C>T;<br>c.1435C>T                                        | p.Arg361*;<br>p.Arg399*;<br>p.Arg479*                                      | 0  | FALSE | chr4:153247367:G:A  | 169:chr4:153247367:G:A  | 0.001262 |
| 45_bl-2 | 45 | PIK3CA | MODERATE           | c.277C>T                                                                     | p.Arg93Trp                                                                 | 24 | FALSE | chr3:178916890:C:T  | 169:chr3:178916890:C:T  | 0.002608 |
| 45_bl-2 | 45 | PTEN   | MODERATE           | c.850G>A                                                                     | p.Glu284Lys                                                                | 2  | FALSE | chr10:89720699:G:A  | 169:chr10:89720699:G:A  | 0.002827 |
| 45_bl-2 | 45 | PIK3CA | MODERATE           | c.2209G>A                                                                    | p.Glu737Lys                                                                | 1  | FALSE | chr3:178941890:G:A  | 169:chr3:178941890:G:A  | 0.001439 |
| 45_bl-2 | 45 | NF1    | MODIFIER; HIGH     | c.*2165G>A;<br>c.2087G>A                                                     | p.Trp696*                                                                  | 2  | FALSE | chr17:29553538:G:A  | 169:chr17:29553538:G:A  | 0.003115 |
| 45_bl-2 | 45 | IGF1R  | MODERATE           | c.3934T>C;<br>c.3937T>C                                                      | p.Ser1312Pro;<br>p.Ser1313Pro                                              | 0  | FALSE | chr15:99500504:T:C  | 169:chr15:99500504:T:C  | 0.006359 |
| 47_bl-1 | 47 | MITF   | MODIFIER; MODERATE | c.93+115G>A;<br>c.208G>A;<br>c.373G>A;<br>c.481G>A;<br>c.526G>A;<br>c.529G>A | p.Ala70Thr;<br>p.Ala125Thr;<br>p.Ala161Thr;<br>p.Ala176Thr;<br>p.Ala177Thr | 0  | FALSE | chr3:69987147:G:A   | 170:chr3:69987147:G:A   | 0.001154 |
| 47_bl-1 | 47 | ATM    | HIGH               | c.1262C>A                                                                    | p.Ser421*                                                                  | 0  | FALSE | chr11:108121454:C:A | 170:chr11:108121454:C:A | 0.001142 |
| 47_bl-1 | 47 | KIT    | MODERATE           | c.1949T>C;<br>c.1961T>C                                                      | p.Val650Ala;<br>p.Val654Ala                                                | 23 | FALSE | chr4:55594258:T:C   | 170:chr4:55594258:T:C   | 0.001225 |
| 47_bl-1 | 47 | KDR    | MODERATE           | c.583G>T                                                                     | p.Ala195Ser                                                                | 1  | FALSE | chr4:55981116:C:A   | 170:chr4:55981116:C:A   | 0.000976 |
| 47_bl-1 | 47 | SMO    | MODERATE           | c.1045A>C                                                                    | p.Thr349Pro                                                                | 0  | FALSE | chr7:128846115:A:C  | 170:chr7:128846115:A:C  | 0.006407 |

|         |    |                |                    |                                                                           |                                                                                                                 |     |       |                        |                                |          |
|---------|----|----------------|--------------------|---------------------------------------------------------------------------|-----------------------------------------------------------------------------------------------------------------|-----|-------|------------------------|--------------------------------|----------|
| 47_bl-1 | 47 | ALK            | MODERATE           | c.2629G>T                                                                 | p.Ala877Ser                                                                                                     | 1   | FALSE | chr2:2945<br>5173:C:A  | 170:chr2:2<br>9455173:C<br>:A  | 0.001343 |
| 47_bl-1 | 47 | FGFR1          | MODERATE           | c.475C>T;<br>c.481C>T;<br>c.724C>T;<br>c.742C>T;<br>c.748C>T;<br>c.841C>T | p.Arg159Trp<br>;<br>p.Arg161Trp<br>;<br>p.Arg242Trp<br>;<br>p.Arg248Trp<br>;<br>p.Arg250Trp<br>;<br>p.Arg281Trp | 2   | FALSE | chr8:3828<br>2215:G:A  | 170:chr8:3<br>8282215:G<br>:A  | 0.001383 |
| 47_bl-1 | 47 | TP53           | HIGH               | c.376G>T;<br>c.457G>T;<br>c.736G>T;<br>c.853G>T                           | p.Glu126*;<br>p.Glu153*;<br>p.Glu246*;<br>p.Glu285*                                                             | 118 | FALSE | chr17:757<br>7085:C:A  | 170:chr17:<br>7577085:C<br>:A  | 0.152016 |
| 47_bl-1 | 47 | PDGFRA         | MODERATE           | c.1516C>A                                                                 | p.Leu506Ile                                                                                                     | 2   | FALSE | chr4:5513<br>9855:C:A  | 170:chr4:5<br>5139855:C<br>:A  | 0.001198 |
| 47_bl-1 | 47 | SMO            | MODERATE           | c.628G>A                                                                  | p.Val210Met                                                                                                     | 0   | FALSE | chr7:1288<br>45134:G:A | 170:chr7:1<br>28845134:<br>G:A | 0.001445 |
| 47_bl-1 | 47 | AKT3           | MODERATE           | c.44G>T                                                                   | p.Arg15Met                                                                                                      | 0   | FALSE | chr1:2440<br>06429:C:A | 170:chr1:2<br>44006429:<br>C:A | 0.00114  |
| 47_bl-1 | 47 | TP53           | MODIFIER; MODERATE | c.-5G>T;<br>c.356G>T;<br>c.473G>T;<br>c.77G>T                             | p.Arg119Leu<br>;<br>p.Arg158Leu<br>;<br>p.Arg26Leu                                                              | 80  | FALSE | chr17:757<br>8457:C:A  | 170:chr17:<br>7578457:C<br>:A  | 0.001516 |
| 47_bl-1 | 47 | CTNNB1         | MODERATE           | c.125C>A                                                                  | p.Thr42Lys                                                                                                      | 0   | FALSE | chr3:4126<br>6128:C:A  | 170:chr3:4<br>1266128:C<br>:A  | 0.00109  |
| 47_bl-1 | 47 | PIK3CA         | MODERATE           | c.892C>A                                                                  | p.Pro298Thr                                                                                                     | 1   | FALSE | chr3:1789<br>21410:C:A | 170:chr3:1<br>78921410:<br>C:A | 0.000924 |
| 47_bl-1 | 47 | DEAR;<br>FBXW7 | MODIFIER; HIGH     | n.108G>A;<br>c.475C>T;<br>c.589C>T;<br>c.829C>T                           | p.Gln159*;<br>p.Gln197*;<br>p.Gln277*                                                                           | 0   | FALSE | chr4:1532<br>58986:G:A | 170:chr4:1<br>53258986:<br>G:A | 0.001161 |
| 47_bl-1 | 47 | FGFR3          | MODERATE           | c.742C>T                                                                  | p.Arg248Cys                                                                                                     | 254 | FALSE | chr4:1803<br>564:C:T   | 170:chr4:1<br>803564:C:<br>T   | 0.006831 |
| 47_bl-1 | 47 | CTNNB1         | MODERATE           | c.98C>A                                                                   | p.Ser33Tyr                                                                                                      | 0   | FALSE | chr3:4126<br>6101:C:A  | 170:chr3:4<br>1266101:C<br>:A  | 0.001623 |

|         |    |        |                    |                                                                                                                                                           |                                                                                                                                                              |   |       |                             |                                 |          |
|---------|----|--------|--------------------|-----------------------------------------------------------------------------------------------------------------------------------------------------------|--------------------------------------------------------------------------------------------------------------------------------------------------------------|---|-------|-----------------------------|---------------------------------|----------|
| 47_bl-1 | 47 | FGFR2  | MODERATE; MODIFIER | c.1002G>T<br>;<br>c.1071G>T<br>;<br>c.1074G>T<br>;<br>c.1338G>T<br>;<br>c.1341G>T<br>;<br>c.987G>T;<br>c.990G>T;<br>c.993G>T;<br>n.1788G>T                | p.Arg334Ser<br>;<br>p.Arg357Ser<br>;<br>p.Arg358Ser<br>;<br>p.Arg446Ser<br>;<br>p.Arg447Ser<br>;<br>p.Arg329Ser<br>;<br>p.Arg330Ser<br>;<br>p.Arg331Ser<br>; | 1 | FALSE | chr10:123<br>263405:C:<br>A | 170:chr10:<br>12326340<br>5:C:A | 0.001878 |
| 47_bl-1 | 47 | PIK3CA | MODERATE           | c.1645G>A                                                                                                                                                 | p.Asp549As<br>n                                                                                                                                              | 4 | FALSE | chr3:1789<br>36103:G:A      | 170:chr3:1<br>78936103:<br>G:A  | 0.001019 |
| 47_bl-1 | 47 | NTRK3  | MODERATE           | c.1459G>T<br>;<br>c.1483G>T                                                                                                                               | p.Asp487Tyr<br>;<br>p.Asp495Tyr                                                                                                                              | 0 | FALSE | chr15:885<br>76190:C:A      | 170:chr15:<br>88576190:<br>C:A  | 0.001403 |
| 47_bl-1 | 47 | FGFR2  | MODERATE; MODIFIER | c.1073A>G<br>;<br>c.1076A>G<br>;<br>c.1079A>G<br>;<br>c.1088A>G<br>;<br>c.1157A>G<br>;<br>c.1160A>G<br>;<br>c.1424A>G<br>;<br>c.1427A>G<br>;<br>n.1874A>G | p.Glu358Gly<br>;<br>p.Glu359Gly<br>;<br>p.Glu360Gly<br>;<br>p.Glu363Gly<br>;<br>p.Glu386Gly<br>;<br>p.Glu387Gly<br>;<br>p.Glu475Gly<br>;<br>p.Glu476Gly<br>; | 2 | FALSE | chr10:123<br>263319:T:<br>C | 170:chr10:<br>12326331<br>9:T:C | 0.00207  |
| 47_bl-1 | 47 | ALK    | MODERATE           | c.446C>T                                                                                                                                                  | p.Ala149Val                                                                                                                                                  | 1 | FALSE | chr2:3014<br>3080:G:A       | 170:chr2:3<br>0143080:G<br>:A   | 0.001479 |
| 47_bl-1 | 47 | NF1    | HIGH               | c.4006C>T                                                                                                                                                 | p.Gln1336*                                                                                                                                                   | 1 | FALSE | chr17:295<br>76033:C:T      | 170:chr17:<br>29576033:<br>C:T  | 0.000999 |
| 47_bl-1 | 47 | NTRK1  | MODERATE           | c.1246C>T;<br>c.1336C>T;<br>c.1354C>T                                                                                                                     | p.Arg416Cys<br>;<br>p.Arg446Cys<br>;<br>p.Arg452Cys                                                                                                          | 1 | FALSE | chr1:1568<br>44800:C:T      | 170:chr1:1<br>56844800:<br>C:T  | 0.001379 |

|         |    |               |                    |                                                                                                                                                                   |                                                                                                                                                              |   |       |                             |                                 |          |
|---------|----|---------------|--------------------|-------------------------------------------------------------------------------------------------------------------------------------------------------------------|--------------------------------------------------------------------------------------------------------------------------------------------------------------|---|-------|-----------------------------|---------------------------------|----------|
| 47_bl-1 | 47 | FGFR2         | MODERATE; MODIFIER | c.1486G>A;<br>;<br>c.1489G>A;<br>;<br>c.1492G>A;<br>;<br>c.1501G>A;<br>;<br>c.1570G>A;<br>;<br>c.1573G>A;<br>;<br>c.1837G>A;<br>;<br>c.1840G>A;<br>;<br>n.2287G>A | p.Gly496Ser<br>;<br>p.Gly497Ser<br>;<br>p.Gly498Ser<br>;<br>p.Gly501Ser<br>;<br>p.Gly524Ser<br>;<br>p.Gly525Ser<br>;<br>p.Gly613Ser<br>;<br>p.Gly614Ser<br>; | 2 | FALSE | chr10:123<br>256072:C:<br>T | 170:chr10:<br>12325607<br>2:C:T | 0.001168 |
| 47_bl-1 | 47 | SMO           | MODERATE           | c.1640G>A                                                                                                                                                         | p.Arg547His                                                                                                                                                  | 0 | FALSE | chr7:1288<br>50377:G:A      | 170:chr7:1<br>28850377:<br>G:A  | 0.001267 |
| 47_bl-1 | 47 | IGF1R         | MODERATE           | c.3934T>C;<br>c.3937T>C                                                                                                                                           | p.Ser1312Pro;<br>p.Ser1313Pro                                                                                                                                | 0 | FALSE | chr15:995<br>00504:T:C      | 170:chr15:<br>99500504:<br>T:C  | 0.014393 |
| 47_bl-1 | 47 | STK11         | MODERATE           | c.628T>C                                                                                                                                                          | p.Cys210Arg                                                                                                                                                  | 1 | FALSE | chr19:122<br>0610:T:C       | 170:chr19:<br>1220610:T<br>:C   | 0.002188 |
| 47_bl-1 | 47 | IGF1R         | MODERATE           | c.3905T>C;<br>c.3908T>C                                                                                                                                           | p.Val1302Ala;<br>p.Val1303Ala                                                                                                                                | 0 | FALSE | chr15:995<br>00475:T:C      | 170:chr15:<br>99500475:<br>T:C  | 0.003894 |
| 47_bl-1 | 47 | PKD1;<br>TSC2 | MODIFIER; MODERATE | c.*13118G>A;<br>c.*13121G>A;<br>c.3935C>T;<br>c.4067C>T;<br>c.4136C>T                                                                                             | p.Ser1312Leu;<br>p.Ser1356Leu;<br>p.Ser1379Leu                                                                                                               | 0 | FALSE | chr16:213<br>4359:C:T       | 170:chr16:<br>2134359:C<br>:T   | 0.001181 |
| 47_bl-1 | 47 | DDR2          | MODERATE           | c.1963G>A                                                                                                                                                         | p.Glu655Lys                                                                                                                                                  | 1 | FALSE | chr1:1627<br>45548:G:A      | 170:chr1:1<br>62745548:<br>G:A  | 0.001636 |
| 47_bl-1 | 47 | PTEN          | MODERATE           | c.860C>T                                                                                                                                                          | p.Ser287Leu                                                                                                                                                  | 3 | FALSE | chr10:897<br>20709:C:T      | 170:chr10:<br>89720709:<br>C:T  | 0.001145 |
| 47_bl-1 | 47 | PIK3CA        | MODERATE           | c.478C>A                                                                                                                                                          | p.His160Asn                                                                                                                                                  | 1 | FALSE | chr3:1789<br>17603:C:A      | 170:chr3:1<br>78917603:<br>C:A  | 0.000913 |
| 47_bl-1 | 47 | TP53          | MODIFIER; MODERATE | c.*145T>C;<br>c.*233T>C;<br>c.1009T>C;<br>c.1126T>C;<br>c.649T>C;<br>c.730T>C                                                                                     | p.Ser337Pro<br>;<br>p.Ser376Pro<br>;<br>p.Ser217Pro<br>;<br>p.Ser244Pro                                                                                      | 2 | FALSE | chr17:757<br>2983:A:G       | 170:chr17:<br>7572983:A<br>:G   | 0.001947 |

|         |    |                    |                            |                                                                                                                         |                                                                                                                 |   |       |                             |                                 |          |
|---------|----|--------------------|----------------------------|-------------------------------------------------------------------------------------------------------------------------|-----------------------------------------------------------------------------------------------------------------|---|-------|-----------------------------|---------------------------------|----------|
| 47_bl-1 | 47 | TP53               | MODERATE; MODIFIER         | c.115G>T;<br>c.232G>T;<br>c.-279G>T;<br>c.-360G>T                                                                       | p.Ala39Ser;<br>p.Ala78Ser;                                                                                      | 1 | FALSE | chr17:757<br>9455:C:A       | 170:chr17:<br>7579455:C<br>:A   | 0.001504 |
| 47_bl-1 | 47 | C9orf53;<br>CDKN2A | MODIFIER; MODERATE;<br>LOW | n.*616T>G<br>;<br>c.*120A>C<br>;<br>c.197A>C;<br>c.240A>C                                                               | p.His66Pro;<br>p.Pro80Pro                                                                                       | 1 | FALSE | chr9:2197<br>1161:T:G       | 170:chr9:2<br>1971161:T<br>:G   | 0.040062 |
| 47_bl-1 | 47 | HGF                | HIGH                       | c.1993G>T<br>;<br>c.2008G>T                                                                                             | p.Glu665*;<br>p.Glu670*                                                                                         | 0 | FALSE | chr7:8133<br>4708:C:A       | 170:chr7:8<br>1334708:C<br>:A   | 0.00106  |
| 47_bl-1 | 47 | TP53               | MODIFIER; MODERATE         | c.*137A>G<br>;<br>c.*225A>G<br>;<br>c.1001A>G<br>;<br>c.1118A>G<br>;<br>c.641A>G;<br>c.722A>G                           | p.Lys334Arg<br>;<br>p.Lys373Arg<br>;<br>p.Lys214Arg<br>;<br>p.Lys241Arg                                         | 1 | FALSE | chr17:757<br>2991:T:C       | 170:chr17:<br>7572991:T<br>:C   | 0.001857 |
| 47_bl-1 | 47 | TSC2               | MODIFIER; MODERATE         | c.2837+11<br>08G>A;<br>c.2933G>A                                                                                        | p.Arg978His                                                                                                     | 0 | FALSE | chr16:212<br>7694:G:A       | 170:chr16:<br>2127694:G<br>:A   | 0.001843 |
| 47_bl-1 | 47 | RET                | MODERATE                   | c.1690A>C                                                                                                               | p.Thr564Pro                                                                                                     | 1 | FALSE | chr10:436<br>08342:A:C      | 170:chr10:<br>43608342:<br>A:C  | 0.005088 |
| 47_bl-1 | 47 | ESR1               | MODERATE                   | c.1019C>T;<br>c.1022C>T;<br>c.1028C>T                                                                                   | p.Ser340Leu<br>;<br>p.Ser341Leu<br>;<br>p.Ser343Leu                                                             | 0 | FALSE | chr6:1522<br>65569:C:T      | 170:chr6:1<br>52265569:<br>C:T  | 0.001188 |
| 47_bl-1 | 47 | FGFR2              | MODIFIER; MODERATE         | c.939+469<br>9A>G;<br>c.1124A>G<br>;<br>c.1127A>G<br>;<br>c.779A>G;<br>c.788A>G;<br>c.857A>G;<br>c.860A>G;<br>n.1574A>G | p.Tyr375Cys<br>;<br>p.Tyr376Cys<br>;<br>p.Tyr260Cys<br>;<br>p.Tyr263Cys<br>;<br>p.Tyr286Cys<br>;<br>p.Tyr287Cys | 9 | FALSE | chr10:123<br>274794:T:<br>C | 170:chr10:<br>12327479<br>4:T:C | 0.001024 |

|         |    |                    |                    |                                                                                                     |                                                                                                                 |    |       |                        |                                |          |
|---------|----|--------------------|--------------------|-----------------------------------------------------------------------------------------------------|-----------------------------------------------------------------------------------------------------------------|----|-------|------------------------|--------------------------------|----------|
| 47_bl-1 | 47 | PIK3CA             | MODERATE           | c.1255C>A                                                                                           | p.His419Asn                                                                                                     | 1  | FALSE | chr3:1789<br>27977:C:A | 170:chr3:1<br>78927977:<br>C:A | 0.001465 |
| 33_bl-2 | 33 | MIR4673;<br>NOTCH1 | MODIFIER; MODERATE | n.*59G>T;<br>c.1343G>T                                                                              | ; ;<br>p.Arg448Leu                                                                                              | 0  | FALSE | chr9:1394<br>12302:C:A | 171:chr9:1<br>39412302:<br>C:A | 0.001855 |
| 33_bl-2 | 33 | HOXD-AS2;<br>HOXD8 | MODIFIER; MODERATE | n.*692C>T;<br>; ;<br>c.304G>A;<br>c.853G>A;<br>c.856G>A                                             | p.Glu102Lys<br>; ;<br>p.Glu285Lys<br>; ;<br>p.Glu286Lys                                                         | 0  | FALSE | chr2:1769<br>96323:G:A | 171:chr2:1<br>76996323:<br>G:A | 0.001155 |
| 33_bl-2 | 33 | HGF                | MODERATE           | c.251G>T                                                                                            | p.Cys84Phe                                                                                                      | 0  | FALSE | chr7:8139<br>2026:C:A  | 171:chr7:8<br>1392026:C<br>:A  | 0.001527 |
| 33_bl-2 | 33 | FGFR1              | MODERATE           | c.1424A>G<br>;<br>c.1430A>G<br>;<br>c.1667A>G<br>;<br>c.1691A>G<br>;<br>c.1697A>G<br>;<br>c.1790A>G | p.Lys475Arg<br>;<br>p.Lys477Arg<br>;<br>p.Lys556Arg<br>;<br>p.Lys564Arg<br>;<br>p.Lys566Arg<br>;<br>p.Lys597Arg | 1  | FALSE | chr8:3827<br>3545:T:C  | 171:chr8:3<br>8273545:T<br>:C  | 0.002757 |
| 33_bl-2 | 33 | NTRK1              | MODERATE           | c.1940T>G<br>;<br>c.2030T>G<br>;<br>c.2048T>G                                                       | p.Val647Gly;<br>p.Val677Gly;<br>p.Val683Gly                                                                     | 2  | FALSE | chr1:1568<br>49792:T:G | 171:chr1:1<br>56849792:<br>T:G | 0.017505 |
| 33_bl-2 | 33 | EGFR               | MODIFIER; MODERATE | c.*2133C><br>A;<br>c.*2364C><br>A;<br>c.1922C>A                                                     | ; ;<br>p.Pro641His                                                                                              | 1  | FALSE | chr7:5524<br>0678:C:A  | 171:chr7:5<br>5240678:C<br>:A  | 0.002064 |
| 33_bl-2 | 33 | TP53               | MODERATE           | c.337G>T;<br>c.418G>T;<br>c.697G>T;<br>c.814G>T                                                     | p.Val113Leu<br>;<br>p.Val140Leu<br>;<br>p.Val233Leu<br>;<br>p.Val272Leu                                         | 85 | FALSE | chr17:757<br>7124:C:A  | 171:chr17:<br>7577124:C<br>:A  | 0.001332 |
| 33_bl-2 | 33 | FGFR3              | MODERATE           | c.1177G>A<br>;<br>c.1513G>A<br>;<br>c.1519G>A                                                       | p.Val393Ile;<br>p.Val505Ile;<br>p.Val507Ile                                                                     | 1  | FALSE | chr4:1807<br>182:G:A   | 171:chr4:1<br>807182:G:<br>A   | 0.001556 |
| 33_bl-2 | 33 | RET                | MODERATE           | c.2161C>T                                                                                           | p.Arg721Trp                                                                                                     | 1  | FALSE | chr10:436<br>12056:C:T | 171:chr10:<br>43612056:<br>C:T | 0.00125  |

|         |    |                    |                            |                                                                                                   |                                                                |    |       |                        |                                |          |
|---------|----|--------------------|----------------------------|---------------------------------------------------------------------------------------------------|----------------------------------------------------------------|----|-------|------------------------|--------------------------------|----------|
| 33_bl-2 | 33 | TP53               | LOW; MODIFIER;<br>MODERATE | c.-2A>T; c.-<br>83A>T;<br>c.278A>T;<br>c.395A>T                                                   | ; p.Lys93Met;<br>p.Lys132Me<br>t                               | 42 | FALSE | chr17:757<br>8535:T:A  | 171:chr17:<br>7578535:T<br>:A  | 0.044816 |
| 33_bl-2 | 33 | TSC1               | MODERATE                   | c.457C>T;<br>c.610C>T                                                                             | p.Arg153Cys<br>;<br>p.Arg204Cys                                | 0  | FALSE | chr9:1357<br>97259:G:A | 171:chr9:1<br>35797259:<br>G:A | 0.001263 |
| 33_bl-2 | 33 | KRAS               | HIGH                       | c.292G>T                                                                                          | p.Glu98*                                                       | 1  | FALSE | chr12:253<br>78706:C:A | 171:chr12:<br>25378706:<br>C:A | 0.002013 |
| 33_bl-2 | 33 | INSRR;<br>NTRK1    | MODIFIER; MODERATE         | c.3397+13<br>C>T;<br>c.28G>A                                                                      | ; p.Ala10Thr                                                   | 1  | FALSE | chr1:1568<br>11891:G:A | 171:chr1:1<br>56811891:<br>G:A | 0.001721 |
| 33_bl-2 | 33 | PHLPP1             | MODERATE                   | c.1753C>A                                                                                         | p.Leu585Me<br>t                                                | 0  | FALSE | chr18:604<br>97444:C:A | 171:chr18:<br>60497444:<br>C:A | 0.001165 |
| 33_bl-2 | 33 | C9orf53;<br>CDKN2A | MODIFIER; MODERATE;<br>LOW | n.*616T>G<br>;<br>c.*120A>C<br>;<br>c.197A>C;<br>c.240A>C                                         | ; p.His66Pro;<br>p.Pro80Pro                                    | 1  | FALSE | chr9:2197<br>1161:T:G  | 171:chr9:2<br>1971161:T<br>:G  | 0.03753  |
| 33_bl-2 | 33 | NTRK3              | MODERATE                   | c.1744G>A<br>;<br>c.1768G>A                                                                       | p.Glu582Lys<br>;<br>p.Glu590Lys                                | 0  | FALSE | chr15:884<br>76364:C:T | 171:chr15:<br>88476364:<br>C:T | 0.0016   |
| 33_bl-2 | 33 | CTNNB1             | MODERATE                   | c.1000G>A                                                                                         | p.Glu334Lys                                                    | 0  | FALSE | chr3:4126<br>8762:G:A  | 171:chr3:4<br>1268762:G<br>:A  | 0.001035 |
| 33_bl-2 | 33 | FGFR3              | MODIFIER; MODERATE         | c.931-<br>398C>A;<br>c.1172C>A<br>;<br>c.1178C>A                                                  | ; p.Ala391Glu<br>;<br>p.Ala393Glu                              | 34 | FALSE | chr4:1806<br>153:C:A   | 171:chr4:1<br>806153:C:<br>A   | 0.001712 |
| 33_bl-2 | 33 | TP53               | MODERATE                   | c.141T>A;<br>c.420T>A;<br>c.537T>A;<br>c.60T>A                                                    | p.His47Gln;<br>p.His140Gln<br>;<br>p.His179Gln<br>; p.His20Gln | 17 | FALSE | chr17:757<br>8393:A:T  | 171:chr17:<br>7578393:A<br>:T  | 0.005952 |
| 33_bl-2 | 33 | GAPDH;<br>IFFO1    | MODERATE; MODIFIER         | c.217G>A;<br>c.343G>A;<br>c.*1743C><br>T;<br>c.*1746C><br>T;<br>c.*1770C><br>T;<br>n.*2798C><br>T | p.Gly73Arg;<br>p.Gly115Arg<br>;                                | 0  | FALSE | chr12:664<br>6282:G:A  | 171:chr12:<br>6646282:G<br>:A  | 0.001594 |
| 33_bl-2 | 33 | MET                | HIGH                       | c.1639C>T                                                                                         | p.Arg547*                                                      | 2  | FALSE | chr7:1163<br>81017:C:T | 171:chr7:1<br>16381017:<br>C:T | 0.001536 |

|         |    |                    |                    |                                                 |                                                               |       |       |                        |                                |          |
|---------|----|--------------------|--------------------|-------------------------------------------------|---------------------------------------------------------------|-------|-------|------------------------|--------------------------------|----------|
| 33_bl-2 | 33 | TP53               | MODERATE           | c.128G>T;<br>c.209G>T;<br>c.488G>T;<br>c.605G>T | p.Arg43Leu;<br>p.Arg70Leu;<br>p.Arg163Leu<br>;<br>p.Arg202Leu | 4     | FALSE | chr17:757<br>8244:C:A  | 171:chr17:<br>7578244:C<br>:A  | 0.001314 |
| 33_bl-2 | 33 | PDGFRA             | MODERATE           | c.1499G>A                                       | p.Arg500Gln                                                   | 1     | FALSE | chr4:5513<br>9838:G:A  | 171:chr4:5<br>5139838:G<br>:A  | 0.001325 |
| 33_bl-2 | 33 | NTRK3              | MODERATE           | c.1463C>T;<br>c.1487C>T                         | p.Ala488Val;<br>p.Ala496Val                                   | 0     | FALSE | chr15:885<br>76186:G:A | 171:chr15:<br>88576186:<br>G:A | 0.001619 |
| 33_bl-2 | 33 | SMO                | MODERATE           | c.1045A>C                                       | p.Thr349Pro                                                   | 0     | FALSE | chr7:1288<br>46115:A:C | 171:chr7:1<br>28846115:<br>A:C | 0.007792 |
| 33_bl-2 | 33 | BRAF               | MODERATE           | c.1799T>A                                       | p.Val600Glu                                                   | 23024 | FALSE | chr7:1404<br>53136:A:T | 171:chr7:1<br>40453136:<br>A:T | 0.024465 |
| 33_bl-2 | 33 | RET                | MODERATE           | c.1690A>C                                       | p.Thr564Pro                                                   | 1     | FALSE | chr10:436<br>08342:A:C | 171:chr10:<br>43608342:<br>A:C | 0.007727 |
| 33_bl-2 | 33 | EGFR               | MODERATE           | c.844G>A                                        | p.Glu282Lys                                                   | 1     | FALSE | chr7:5522<br>1800:G:A  | 171:chr7:5<br>5221800:G<br>:A  | 0.001241 |
| 33_bl-2 | 33 | MIR4673;<br>NOTCH1 | MODIFIER; MODERATE | n.-1G>A;<br>c.475G>A                            | ;<br>p.Glu159Lys                                              | 0     | FALSE | chr9:1394<br>17569:C:T | 171:chr9:1<br>39417569:<br>C:T | 0.00173  |
| 33_bl-2 | 33 | NOTCH1             | MODERATE           | c.5257G>T                                       | p.Gly1753Tr<br>p                                              | 0     | FALSE | chr9:1393<br>96851:C:A | 171:chr9:1<br>39396851:<br>C:A | 0.003546 |
| 33_bl-2 | 33 | FBXW7              | MODERATE           | c.1078G>T<br>;<br>c.1318G>T<br>;<br>c.964G>T    | p.Asp360Tyr<br>;<br>p.Asp440Tyr<br>;<br>p.Asp322Tyr           | 0     | FALSE | chr4:1532<br>49460:C:A | 171:chr4:1<br>53249460:<br>C:A | 0.001194 |
| 33_bl-2 | 33 | ALK                | MODERATE           | c.2629G>T                                       | p.Ala877Ser                                                   | 1     | FALSE | chr2:2945<br>5173:C:A  | 171:chr2:2<br>9455173:C<br>:A  | 0.001494 |
| 33_bl-2 | 33 | PIK3CA             | MODERATE           | c.518C>A                                        | p.Ser173Tyr                                                   | 1     | FALSE | chr3:1789<br>17643:C:A | 171:chr3:1<br>78917643:<br>C:A | 0.00104  |
| 33_bl-2 | 33 | BRAF               | MODERATE           | c.1781A>G                                       | p.Asp594Gly                                                   | 59    | FALSE | chr7:1404<br>53154:T:C | 171:chr7:1<br>40453154:<br>T:C | 0.001264 |
| 33_bl-2 | 33 | EPHA3              | MODERATE           | c.497C>A                                        | p.Thr166Asn                                                   | 0     | FALSE | chr3:8925<br>9353:C:A  | 171:chr3:8<br>9259353:C<br>:A  | 0.00114  |
| 33_bl-2 | 33 | TP53               | MODERATE           | c.211A>G;<br>c.292A>G;<br>c.571A>G;<br>c.688A>G | p.Thr71Ala;<br>p.Thr98Ala;<br>p.Thr191Ala<br>;<br>p.Thr230Ala | 10    | FALSE | chr17:757<br>7593:T:C  | 171:chr17:<br>7577593:T<br>:C  | 0.001123 |



|         |    |                           |                            |                                                                                               |                                                                         |     |       |                        |                                |          |
|---------|----|---------------------------|----------------------------|-----------------------------------------------------------------------------------------------|-------------------------------------------------------------------------|-----|-------|------------------------|--------------------------------|----------|
| 33_bl-2 | 33 | TP53                      | MODIFIER; MODERATE         | c.-9G>T;<br>c.352G>T;<br>c.469G>T;<br>c.73G>T                                                 | p.Val118Phe<br>;<br>p.Val157Phe<br>;<br>p.Val25Phe                      | 169 | FALSE | chr17:757<br>8461:C:A  | 171:chr17:<br>7578461:C<br>:A  | 0.001444 |
| 33_bl-2 | 33 | KIT                       | MODERATE                   | c.1156G>A                                                                                     | p.Glu386Lys                                                             | 1   | FALSE | chr4:5557<br>5630:G:A  | 171:chr4:5<br>5575630:G<br>:A  | 0.001245 |
| 33_bl-2 | 33 | FLT3                      | MODERATE                   | c.2678C>T                                                                                     | p.Pro893Leu                                                             | 0   | FALSE | chr13:285<br>89369:G:A | 171:chr13:<br>28589369:<br>G:A | 0.001267 |
| 33_bl-2 | 33 | CDKN2A;<br>CDKN2B-<br>AS1 | MODERATE; MODIFIER         | c.22A>G;<br>n.-1T>C                                                                           | p.Thr8Ala;                                                              | 1   | FALSE | chr9:2199<br>4309:T:C  | 171:chr9:2<br>1994309:T<br>:C  | 0.003713 |
| 33_bl-2 | 33 | KIT                       | MODERATE                   | c.1485C>A                                                                                     | p.Asn495Lys                                                             | 1   | FALSE | chr4:5559<br>2161:C:A  | 171:chr4:5<br>5592161:C<br>:A  | 0.001305 |
| 33_bl-2 | 33 | IGF1R                     | MODERATE                   | c.1511G>A                                                                                     | p.Arg504His                                                             | 0   | FALSE | chr15:994<br>54592:G:A | 171:chr15:<br>99454592:<br>G:A | 0.00119  |
| 33_bl-2 | 33 | CTNNB1                    | MODERATE                   | c.884C>A                                                                                      | p.Ala295Asp                                                             | 0   | FALSE | chr3:4126<br>7300:C:A  | 171:chr3:4<br>1267300:C<br>:A  | 0.001215 |
| 33_bl-2 | 33 | IGF1R                     | MODERATE                   | c.3905T>C;<br>c.3908T>C                                                                       | p.Val1302Ala;<br>p.Val1303Ala                                           | 0   | FALSE | chr15:995<br>00475:T:C | 171:chr15:<br>99500475:<br>T:C | 0.007133 |
| 33_bl-2 | 33 | PHLPP1                    | HIGH                       | c.3139C>T                                                                                     | p.Arg1047*                                                              | 0   | FALSE | chr18:606<br>09129:C:T | 171:chr18:<br>60609129:<br>C:T | 0.001307 |
| 33_bl-2 | 33 | C9orf53;<br>CDKN2A        | MODIFIER; MODERATE;<br>LOW | n.*616A>G<br>;<br>c.*114T>C;<br>c.191T>C;<br>c.234T>C                                         | p.Leu64Pro;<br>p.Ala78Ala                                               | 1   | FALSE | chr9:2197<br>1167:A:G  | 171:chr9:2<br>1971167:A<br>:G  | 0.002372 |
| 33_bl-2 | 33 | TP53                      | MODIFIER; MODERATE         | c.*137A>G<br>;<br>c.*225A>G<br>;<br>c.1001A>G<br>;<br>c.1118A>G<br>;<br>c.641A>G;<br>c.722A>G | p.Lys334Arg<br>;<br>p.Lys373Arg<br>;<br>p.Lys214Arg<br>;<br>p.Lys241Arg | 1   | FALSE | chr17:757<br>2991:T:C  | 171:chr17:<br>7572991:T<br>:C  | 0.00282  |
| 46_bl-1 | 46 | GNA11                     | MODERATE                   | c.440G>A                                                                                      | p.Arg147His                                                             | 1   | FALSE | chr19:311<br>3446:G:A  | 172:chr19:<br>3113446:G<br>:A  | 0.001947 |
| 46_bl-1 | 46 | FGFR4                     | MODERATE                   | c.1862C>T;<br>c.1946C>T;<br>c.2066C>T                                                         | p.Pro621Leu<br>;<br>p.Pro649Leu<br>;<br>p.Pro689Leu                     | 1   | FALSE | chr5:1765<br>23655:C:T | 172:chr5:1<br>76523655:<br>C:T | 0.002203 |

|         |    |        |                    |                                                                                               |                                                                         |       |       |                             |                                 |          |
|---------|----|--------|--------------------|-----------------------------------------------------------------------------------------------|-------------------------------------------------------------------------|-------|-------|-----------------------------|---------------------------------|----------|
| 46_bl-1 | 46 | PTEN   | HIGH               | c.822G>A                                                                                      | p.Trp274*                                                               | 3     | FALSE | chr10:897<br>20671:G:A      | 172:chr10:<br>89720671:<br>G:A  | 0.001541 |
| 46_bl-1 | 46 | CDKN2A | MODIFIER; MODERATE | c.194-<br>3567C>T;<br>c.53C>T                                                                 | ; p.Thr18Met                                                            | 1     | FALSE | chr9:2197<br>4774:G:A       | 172:chr9:2<br>1974774:G<br>:A   | 0.003378 |
| 46_bl-1 | 46 | FBXW7  | MODERATE           | c.1081C>T;<br>c.1321C>T;<br>c.967C>T                                                          | p.Arg361Trp<br>;<br>p.Arg441Trp<br>;<br>p.Arg323Trp                     | 0     | FALSE | chr4:1532<br>49457:G:A      | 172:chr4:1<br>53249457:<br>G:A  | 0.001773 |
| 46_bl-1 | 46 | KRAS   | MODERATE           | c.35G>T                                                                                       | p.Gly12Val                                                              | 11213 | FALSE | chr12:253<br>98284:C:A      | 172:chr12:<br>25398284:<br>C:A  | 0.00181  |
| 46_bl-1 | 46 | TSC2   | MODERATE           | c.1654G>A                                                                                     | p.Ala552Thr                                                             | 0     | FALSE | chr16:211<br>5574:G:A       | 172:chr16:<br>2115574:G<br>:A   | 0.00177  |
| 46_bl-1 | 46 | TP53   | MODIFIER; MODERATE | c.*137A>G<br>;<br>c.*225A>G<br>;<br>c.1001A>G<br>;<br>c.1118A>G<br>;<br>c.641A>G;<br>c.722A>G | p.Lys334Arg<br>;<br>p.Lys373Arg<br>;<br>p.Lys214Arg<br>;<br>p.Lys241Arg | 1     | FALSE | chr17:757<br>2991:T:C       | 172:chr17:<br>7572991:T<br>:C   | 0.005181 |
| 46_bl-1 | 46 | ATM    | MODERATE           | c.2075G>A                                                                                     | p.Arg692His                                                             | 0     | FALSE | chr11:108<br>124717:G:<br>A | 172:chr11:<br>10812471<br>7:G:A | 0.001631 |
| 46_bl-1 | 46 | RET    | MODERATE           | c.2116G>A                                                                                     | p.Val706Me<br>t                                                         | 2     | FALSE | chr10:436<br>10164:G:A      | 172:chr10:<br>43610164:<br>G:A  | 0.001517 |
| 46_bl-1 | 46 | KIT    | MODERATE           | c.2671G>A<br>;<br>c.2683G>A                                                                   | p.Ala891Thr<br>;<br>p.Ala895Thr                                         | 3     | FALSE | chr4:5560<br>2973:G:A       | 172:chr4:5<br>5602973:G<br>:A   | 0.00153  |
| 46_bl-1 | 46 | EGFR   | MODERATE           | c.755G>A                                                                                      | p.Arg252His                                                             | 3     | FALSE | chr7:5522<br>1711:G:A       | 172:chr7:5<br>5221711:G<br>:A   | 0.001776 |
| 46_bl-1 | 46 | EPHA3  | MODERATE           | c.686C>A                                                                                      | p.Ser229Tyr                                                             | 0     | FALSE | chr3:8925<br>9542:C:A       | 172:chr3:8<br>9259542:C<br>:A   | 0.001736 |
| 46_bl-1 | 46 | AKT3   | MODERATE           | c.797A>G                                                                                      | p.Lys266Arg                                                             | 0     | FALSE | chr1:2437<br>36250:T:C      | 172:chr1:2<br>43736250:<br>T:C  | 0.002465 |
| 46_bl-1 | 46 | PTEN   | MODERATE           | c.302T>C                                                                                      | p.Ile101Thr                                                             | 8     | FALSE | chr10:896<br>92818:T:C      | 172:chr10:<br>89692818:<br>T:C  | 0.001947 |
| 46_bl-1 | 46 | FGFR3  | MODIFIER; MODERATE | c.931-<br>374G>A;<br>c.1196G>A<br>;<br>c.1202G>A                                              | ; p.Arg399His<br>;<br>p.Arg401His                                       | 1     | FALSE | chr4:1806<br>177:G:A        | 172:chr4:1<br>806177:G:<br>A    | 0.001934 |
| 46_bl-1 | 46 | PDGFRA | MODERATE           | c.2465G>A                                                                                     | p.Arg822His                                                             | 3     | FALSE | chr4:5515<br>2033:G:A       | 172:chr4:5<br>5152033:G<br>:A   | 0.001732 |

|         |    |                             |                            |                                                                                               |                                                          |   |       |                             |                                 |          |
|---------|----|-----------------------------|----------------------------|-----------------------------------------------------------------------------------------------|----------------------------------------------------------|---|-------|-----------------------------|---------------------------------|----------|
| 48_bl-1 | 48 | C9orf53;<br>CDKN2A          | MODIFIER; MODERATE;<br>LOW | n.*616T>G<br>;<br>c.*120A>C<br>;<br>c.197A>C;<br>c.240A>C                                     | p.His66Pro;<br>p.Pro80Pro                                | 1 | FALSE | chr9:2197<br>1161:T:G       | 173:chr9:2<br>1971161:T<br>:G   | 0.023438 |
| 48_bl-1 | 48 | NF1                         | MODERATE                   | c.5302G>A<br>;<br>c.5365G>A                                                                   | p.Glu1768Ly<br>s;<br>p.Glu1789Ly<br>s                    | 1 | FALSE | chr17:296<br>54613:G:A      | 173:chr17:<br>29654613:<br>G:A  | 0.001248 |
| 48_bl-1 | 48 | ATM                         | MODERATE                   | c.2803A>G                                                                                     | p.Thr935Ala                                              | 0 | FALSE | chr11:108<br>139301:A:<br>G | 173:chr11:<br>10813930<br>1:A:G | 0.001259 |
| 48_bl-1 | 48 | NF1                         | MODERATE                   | c.4321C>T;<br>c.4384C>T                                                                       | p.Arg1441Tr<br>p;<br>p.Arg1462Tr<br>p                    | 1 | FALSE | chr17:295<br>86101:C:T      | 173:chr17:<br>29586101:<br>C:T  | 0.001262 |
| 48_bl-1 | 48 | APC                         | MODERATE                   | c.1171C>A<br>;<br>c.1225C>A                                                                   | p.Leu391Ile;<br>p.Leu409Ile                              | 0 | FALSE | chr5:1121<br>54954:C:A      | 173:chr5:1<br>12154954:<br>C:A  | 0.001221 |
| 48_bl-1 | 48 | EPHA3                       | MODERATE                   | c.2306G>A                                                                                     | p.Arg769His                                              | 0 | FALSE | chr3:8948<br>0469:G:A       | 173:chr3:8<br>9480469:G<br>:A   | 0.001288 |
| 48_bl-1 | 48 | KDR                         | MODERATE                   | c.1040G>A                                                                                     | p.Arg347His                                              | 4 | FALSE | chr4:5597<br>6872:C:T       | 173:chr4:5<br>5976872:C<br>:T   | 0.001022 |
| 48_bl-1 | 48 | PDGFRA                      | MODERATE                   | c.100G>A                                                                                      | p.Glu34Lys                                               | 1 | FALSE | chr4:5512<br>7312:G:A       | 173:chr4:5<br>5127312:G<br>:A   | 0.001271 |
| 48_bl-1 | 48 | KDR                         | MODERATE                   | c.3760G>A                                                                                     | p.Asp1254A<br>sn                                         | 1 | FALSE | chr4:5594<br>8705:C:T       | 173:chr4:5<br>5948705:C<br>:T   | 0.001385 |
| 48_bl-1 | 48 | ERBB2;<br>MIEN1;<br>MIR4728 | MODERATE; MODIFIER         | c.2597G>A<br>;<br>c.2642G>A<br>;<br>c.2687G>A<br>;<br>n.3011G>A<br>;<br>c.*388C>T;<br>n.-1G>A | p.Arg866His<br>;<br>p.Arg881His<br>;<br>p.Arg896His<br>; | 2 | FALSE | chr17:378<br>81617:G:A      | 173:chr17:<br>37881617:<br>G:A  | 0.001779 |
| 48_bl-1 | 48 | CTNNB1                      | MODERATE                   | c.98C>A                                                                                       | p.Ser33Tyr                                               | 0 | FALSE | chr3:4126<br>6101:C:A       | 173:chr3:4<br>1266101:C<br>:A   | 0.001206 |
| 48_bl-1 | 48 | PIK3CA                      | MODERATE                   | c.1612G>A                                                                                     | p.Asp538As<br>n                                          | 3 | FALSE | chr3:1789<br>36070:G:A      | 173:chr3:1<br>78936070:<br>G:A  | 0.001285 |
| 48_bl-1 | 48 | FBXW7                       | MODERATE                   | c.1444G>T<br>;<br>c.1558G>T<br>;<br>c.1798G>T                                                 | p.Asp482Tyr<br>;<br>p.Asp520Tyr<br>;<br>p.Asp600Tyr      | 0 | FALSE | chr4:1532<br>45393:C:A      | 173:chr4:1<br>53245393:<br>C:A  | 0.001358 |
| 48_bl-1 | 48 | NTRK3                       | MODERATE                   | c.446C>T                                                                                      | p.Thr149Me<br>t                                          | 0 | FALSE | chr15:886<br>90584:G:A      | 173:chr15:<br>88690584:<br>G:A  | 0.001639 |

|         |    |        |                    |                                                                                                   |                                                                         |    |       |                        |                                |          |
|---------|----|--------|--------------------|---------------------------------------------------------------------------------------------------|-------------------------------------------------------------------------|----|-------|------------------------|--------------------------------|----------|
| 48_bl-1 | 48 | TSC2   | MODERATE           | c.1610G>A                                                                                         | p.Arg537His                                                             | 0  | FALSE | chr16:211<br>5530:G:A  | 173:chr16:<br>2115530:G<br>:A  | 0.001281 |
| 48_bl-1 | 48 | NF1    | MODERATE           | c.2695T>G                                                                                         | p.Leu899Val                                                             | 3  | FALSE | chr17:295<br>56328:T:G | 173:chr17:<br>29556328:<br>T:G | 0.002651 |
| 48_bl-1 | 48 | RET    | MODERATE           | c.1690A>C                                                                                         | p.Thr564Pro                                                             | 1  | FALSE | chr10:436<br>08342:A:C | 173:chr10:<br>43608342:<br>A:C | 0.001352 |
| 48_bl-1 | 48 | MAP2K2 | MODERATE           | c.169T>G                                                                                          | p.Phe57Val                                                              | 0  | FALSE | chr19:411<br>7551:A:C  | 173:chr19:<br>4117551:A<br>:C  | 0.001446 |
| 48_bl-1 | 48 | ALK    | MODERATE           | c.641G>A                                                                                          | p.Arg214His                                                             | 1  | FALSE | chr2:3014<br>2885:C:T  | 173:chr2:3<br>0142885:C<br>:T  | 0.001942 |
| 48_bl-1 | 48 | ROS1   | MODERATE           | c.5782C>T                                                                                         | p.Leu1928P<br>he                                                        | 1  | FALSE | chr6:1176<br>41189:G:A | 173:chr6:1<br>17641189:<br>G:A | 0.001282 |
| 48_bl-1 | 48 | TP53   | MODIFIER; MODERATE | c.*137A>G<br>;<br>c.*225A>G<br>;<br>c.1001A>G<br>;<br>c.1118A>G<br>;<br>c.641A>G<br>;<br>c.722A>G | p.Lys334Arg<br>;<br>p.Lys373Arg<br>;<br>p.Lys214Arg<br>;<br>p.Lys241Arg | 1  | FALSE | chr17:757<br>2991:T:C  | 173:chr17:<br>7572991:T<br>:C  | 0.005703 |
| 48_bl-1 | 48 | ERBB2  | MODERATE; MODIFIER | c.1191C>A<br>;<br>c.1236C>A<br>;<br>c.1281C>A<br>;<br>n.1605C>A                                   | p.Asn397Lys<br>;<br>p.Asn412Lys<br>;<br>p.Asn427Lys                     | 1  | FALSE | chr17:378<br>71757:C:A | 173:chr17:<br>37871757:<br>C:A | 0.001339 |
| 48_bl-1 | 48 | EGFR   | MODIFIER; MODERATE | c.*1464C><br>A;<br>c.1476C>A                                                                      | p.Ser492Arg                                                             | 4  | FALSE | chr7:5522<br>8009:C:A  | 173:chr7:5<br>5228009:C<br>:A  | 0.001254 |
| 48_bl-1 | 48 | FBXW7  | MODERATE           | c.1159C>T;<br>c.1273C>T;<br>c.1513C>T                                                             | p.Arg387Cys<br>;<br>p.Arg425Cys<br>;<br>p.Arg505Cys                     | 0  | FALSE | chr4:1532<br>47289:G:A | 173:chr4:1<br>53247289:<br>G:A | 0.001212 |
| 48_bl-1 | 48 | FGFR3  | MODIFIER; MODERATE | c.931-<br>398C>A;<br>c.1172C>A<br>;<br>c.1178C>A                                                  | p.Ala391Glu<br>;<br>p.Ala393Glu                                         | 34 | FALSE | chr4:1806<br>153:C:A   | 173:chr4:1<br>806153:C:<br>A   | 0.002506 |
| 48_bl-1 | 48 | ALK    | MODERATE           | c.886G>A                                                                                          | p.Glu296Lys                                                             | 1  | FALSE | chr2:2991<br>7782:C:T  | 173:chr2:2<br>9917782:C<br>:T  | 0.001198 |

|         |    |                    |                            |                                                           |                                       |       |       |                             |                                 |          |
|---------|----|--------------------|----------------------------|-----------------------------------------------------------|---------------------------------------|-------|-------|-----------------------------|---------------------------------|----------|
| 48_bl-1 | 48 | FBXW7              | HIGH                       | c.1027G>T<br>;<br>c.1267G>T<br>; c.913G>T                 | p.Gly343*;<br>p.Gly423*;<br>p.Gly305* | 0     | FALSE | chr4:1532<br>49511:C:A      | 173:chr4:1<br>53249511:<br>C:A  | 0.001321 |
| 48_bl-1 | 48 | MAP2K1             | MODERATE                   | c.145C>T                                                  | p.Arg49Cys                            | 1     | FALSE | chr15:667<br>27429:C:T      | 173:chr15:<br>66727429:<br>C:T  | 0.001286 |
| 48_bl-1 | 48 | ATM                | MODERATE                   | c.743G>A                                                  | p.Arg248Gln                           | 0     | FALSE | chr11:108<br>115595:G:<br>A | 173:chr11:<br>10811559<br>5:G:A | 0.00119  |
| 48_bl-1 | 48 | NRAS               | MODERATE                   | c.394G>A                                                  | p.Glu132Lys                           | 2     | FALSE | chr1:1152<br>52246:C:T      | 173:chr1:1<br>15252246:<br>C:T  | 0.001783 |
| 49_bl-2 | 49 | C9orf53;<br>CDKN2A | MODIFIER; MODERATE;<br>LOW | n.*616T>G<br>;<br>c.*120A>C<br>;<br>c.197A>C;<br>c.240A>C | p.His66Pro;<br>p.Pro80Pro             | 1     | FALSE | chr9:2197<br>1161:T:G       | 174:chr9:2<br>1971161:T<br>:G   | 0.008114 |
| 49_bl-2 | 49 | NF1                | MODERATE                   | c.6405C>A<br>;<br>c.6468C>A                               | p.Phe2135L<br>eu;<br>p.Phe2156L<br>eu | 1     | FALSE | chr17:296<br>64426:C:A      | 174:chr17:<br>29664426:<br>C:A  | 0.0025   |
| 49_bl-2 | 49 | IDH1               | MODERATE                   | c.299G>T                                                  | p.Arg100Leu                           | 5     | FALSE | chr2:2091<br>13208:C:A      | 174:chr2:2<br>09113208:<br>C:A  | 0.002509 |
| 49_bl-2 | 49 | ATM                | MODERATE                   | c.2803A>G                                                 | p.Thr935Ala                           | 0     | FALSE | chr11:108<br>139301:A:<br>G | 174:chr11:<br>10813930<br>1:A:G | 0.002472 |
| 49_bl-2 | 49 | SMO                | MODERATE                   | c.1045A>C                                                 | p.Thr349Pro                           | 0     | FALSE | chr7:1288<br>46115:A:C      | 174:chr7:1<br>28846115:<br>A:C  | 0.002323 |
| 49_bl-2 | 49 | EGFR               | MODERATE                   | c.406C>A                                                  | p.Pro136Thr                           | 1     | FALSE | chr7:5521<br>1163:C:A       | 174:chr7:5<br>5211163:C<br>:A   | 0.002981 |
| 49_bl-2 | 49 | KRAS               | MODERATE                   | c.35G>A                                                   | p.Gly12Asp                            | 11213 | FALSE | chr12:253<br>98284:C:T      | 174:chr12:<br>25398284:<br>C:T  | 0.010057 |
| 49_c2-b | 49 | C9orf53;<br>CDKN2A | MODIFIER; MODERATE         | n.*616C>G<br>;<br>c.*140G>C<br>;<br>c.217G>C;<br>c.260G>C | p.Ala73Pro;<br>p.Arg87Pro             | 1     | FALSE | chr9:2197<br>1141:C:G       | 175:chr9:2<br>1971141:C<br>:G   | 0.056569 |

|         |    |                    |                            |                                                                                                                        |                                                                         |    |       |                        |                                 |          |
|---------|----|--------------------|----------------------------|------------------------------------------------------------------------------------------------------------------------|-------------------------------------------------------------------------|----|-------|------------------------|---------------------------------|----------|
| 49_c2-b | 49 | CSDE1;<br>NRAS     | MODIFIER; MODERATE         | c.*2430G><br>A;<br>c.*2523G><br>A;<br>c.*2817G><br>A;<br>c.*2910G><br>A;<br>c.*2964G><br>A;<br>c.*3057G><br>A; c.52G>A | p.Ala18Thr                                                              | 13 | TRUE  | chr1:1152<br>58730:C:T | 175:chr1:1<br>15258730:<br>:C:T | 0.002401 |
| 49_c2-b | 49 | TP53               | MODIFIER; MODERATE         | c.*137A>G<br>;<br>c.*225A>G<br>;<br>c.1001A>G<br>;<br>c.1118A>G<br>;<br>c.641A>G;<br>c.722A>G                          | p.Lys334Arg<br>;<br>p.Lys373Arg<br>;<br>p.Lys214Arg<br>;<br>p.Lys241Arg | 1  | FALSE | chr17:757<br>2991:T:C  | 175:chr17:<br>7572991:T<br>:C   | 0.003241 |
| 49_c2-b | 49 | FGFR1              | LOW; MODIFIER;<br>MODERATE | c.-25C>T;<br>c.167C>T;<br>c.68C>T                                                                                      | p.Pro56Leu;<br>p.Pro23Leu                                               | 1  | FALSE | chr8:3831<br>4897:G:A  | 175:chr8:3<br>8314897:G<br>:A   | 0.001852 |
| 49_c2-b | 49 | C9orf53;<br>CDKN2A | MODIFIER; MODERATE;<br>LOW | n.*616T>G<br>;<br>c.*120A>C<br>;<br>c.197A>C;<br>c.240A>C                                                              | p.His66Pro;<br>p.Pro80Pro                                               | 1  | FALSE | chr9:2197<br>1161:T:G  | 175:chr9:2<br>1971161:T<br>:G   | 0.021944 |
| 49_c2-b | 49 | EGFR;<br>EGFR-AS1  | MODIFIER; MODERATE         | c.*2364G><br>A;<br>c.2281G>A<br>;<br>n.*2821C><br>T                                                                    | p.Asp761As<br>n                                                         | 4  | FALSE | chr7:5524<br>2511:G:A  | 175:chr7:5<br>5242511:G<br>:A   | 0.002174 |
| 49_c2-b | 49 | EPHA3              | MODERATE                   | c.2306G>A                                                                                                              | p.Arg769His                                                             | 0  | FALSE | chr3:8948<br>0469:G:A  | 175:chr3:8<br>9480469:G<br>:A   | 0.004592 |
| 49_c2-b | 49 | NOTCH1             | MODERATE                   | c.4252G>A                                                                                                              | p.Ala1418Th<br>r                                                        | 0  | FALSE | chr9:1394<br>00096:C:T | 175:chr9:1<br>39400096:<br>C:T  | 0.003836 |
| 49_c2-b | 49 | PIK3CA             | MODERATE                   | c.3154A>G                                                                                                              | p.Thr1052Al<br>a                                                        | 3  | FALSE | chr3:1789<br>52099:A:G | 175:chr3:1<br>78952099:<br>A:G  | 0.002101 |
| 49_c2-b | 49 | MIR4673;<br>NOTCH1 | MODIFIER; MODERATE         | n.*59A>G;<br>c.890A>G                                                                                                  | p.Asp297Gly                                                             | 0  | FALSE | chr9:1394<br>13252:T:C | 175:chr9:1<br>39413252:<br>T:C  | 0.004412 |

|         |    |                    |                    |                                                                                               |                                                                         |   |       |                             |                                 |          |
|---------|----|--------------------|--------------------|-----------------------------------------------------------------------------------------------|-------------------------------------------------------------------------|---|-------|-----------------------------|---------------------------------|----------|
| 49_c2-b | 49 | C9orf53;<br>CDKN2A | MODIFIER; MODERATE | n.*616A>C<br>;<br>c.*137T>G<br>;<br>c.214T>G;<br>c.257T>G                                     | p.Cys72Gly;<br>p.Leu86Arg                                               | 1 | FALSE | chr9:2197<br>1144:A:C       | 175:chr9:2<br>1971144:A<br>:C   | 0.003945 |
| 49_c2-b | 49 | NTRK1              | MODERATE           | c.2017G>A<br>;<br>c.2107G>A<br>;<br>c.2125G>A                                                 | p.Asp673As<br>n;<br>p.Asp703As<br>n;<br>p.Asp709As<br>n                 | 1 | FALSE | chr1:1568<br>49869:G:A      | 175:chr1:1<br>56849869:<br>G:A  | 0.002381 |
| 49_c2-b | 49 | FBXW7              | MODERATE           | c.181C>T;<br>c.295C>T;<br>c.535C>T                                                            | p.Arg61Cys;<br>p.Arg99Cys;<br>p.Arg179Cys                               | 0 | FALSE | chr4:1532<br>71243:G:A      | 175:chr4:1<br>53271243:<br>G:A  | 0.002361 |
| 56_bl-2 | 56 | PIK3R1             | MODERATE           | c.1045C>T;<br>c.1135C>T;<br>c.1945C>T;<br>c.856C>T                                            | p.Arg349Trp<br>;<br>p.Arg379Trp<br>;<br>p.Arg649Trp<br>;<br>p.Arg286Trp | 1 | FALSE | chr5:6759<br>2129:C:T       | 176:chr5:6<br>7592129:C<br>:T   | 0.001609 |
| 56_bl-2 | 56 | NTRK1              | MODERATE           | c.804C>G;<br>c.894C>G                                                                         | p.His268Gln<br>;<br>p.His298Gln                                         | 1 | FALSE | chr1:1568<br>43468:C:G      | 176:chr1:1<br>56843468:<br>C:G  | 0.004798 |
| 56_bl-2 | 56 | TP53               | MODIFIER; MODERATE | c.*137A>G<br>;<br>c.*225A>G<br>;<br>c.1001A>G<br>;<br>c.1118A>G<br>;<br>c.641A>G;<br>c.722A>G | p.Lys334Arg<br>;<br>p.Lys373Arg<br>;<br>p.Lys214Arg<br>;<br>p.Lys241Arg | 1 | FALSE | chr17:757<br>2991:T:C       | 176:chr17:<br>7572991:T<br>:C   | 0.007595 |
| 56_bl-2 | 56 | MET                | HIGH               | c.1639C>T                                                                                     | p.Arg547*                                                               | 2 | FALSE | chr7:1163<br>81017:C:T      | 176:chr7:1<br>16381017:<br>C:T  | 0.001314 |
| 56_bl-2 | 56 | KDR                | MODERATE           | c.3434G>A                                                                                     | p.Gly1145Glu                                                            | 1 | FALSE | chr4:5595<br>5111:C:T       | 176:chr4:5<br>5955111:C<br>:T   | 0.001163 |
| 56_bl-2 | 56 | ATM                | MODERATE           | c.2150G>A                                                                                     | p.Arg717Gln                                                             | 0 | FALSE | chr11:108<br>126967:G:<br>A | 176:chr11:<br>10812696<br>7:G:A | 0.001533 |
| 56_bl-2 | 56 | KIT                | MODERATE           | c.365G>A                                                                                      | p.Arg122His                                                             | 1 | FALSE | chr4:5556<br>4477:G:A       | 176:chr4:5<br>5564477:G<br>:A   | 0.001969 |
| 56_bl-2 | 56 | NOTCH1             | MODERATE           | c.4966G>A                                                                                     | p.Gly1656Ser                                                            | 0 | FALSE | chr9:1393<br>99177:C:T      | 176:chr9:1<br>39399177:<br>C:T  | 0.002997 |

|         |    |                    |                            |                                                           |                                                               |      |       |                             |                                 |          |
|---------|----|--------------------|----------------------------|-----------------------------------------------------------|---------------------------------------------------------------|------|-------|-----------------------------|---------------------------------|----------|
| 56_bl-2 | 56 | C9orf53;<br>CDKN2A | MODIFIER; MODERATE;<br>LOW | n.*616T>G<br>;<br>c.*120A>C<br>;<br>c.197A>C;<br>c.240A>C | p.His66Pro;<br>p.Pro80Pro                                     | 1    | FALSE | chr9:2197<br>1161:T:G       | 176:chr9:2<br>1971161:T<br>:G   | 0.020408 |
| 56_bl-2 | 56 | ALK                | HIGH                       | c.3895G>T                                                 | p.Glu1299*                                                    | 1    | FALSE | chr2:2943<br>0080:C:A       | 176:chr2:2<br>9430080:C<br>:A   | 0.001966 |
| 56_bl-2 | 56 | FGFR3              | MODIFIER; MODERATE         | c.931-<br>374G>A;<br>c.1196G>A<br>;<br>c.1202G>A          | p.Arg399His<br>;<br>p.Arg401His                               | 1    | FALSE | chr4:1806<br>177:G:A        | 176:chr4:1<br>806177:G:<br>A    | 0.002334 |
| 56_bl-2 | 56 | AKT1               | MODERATE                   | c.1108C>T                                                 | p.Arg370Cys                                                   | 1    | FALSE | chr14:105<br>239279:G:<br>A | 176:chr14:<br>10523927<br>9:G:A | 0.001748 |
| 56_bl-2 | 56 | TP53               | MODERATE                   | c.10T>A;<br>c.370T>A;<br>c.487T>A;<br>c.91T>A             | p.Tyr4Asn;<br>p.Tyr124Asn<br>;<br>p.Tyr163Asn<br>; p.Tyr31Asn | 23   | FALSE | chr17:757<br>8443:A:T       | 176:chr17:<br>7578443:A<br>:T   | 0.001702 |
| 56_bl-2 | 56 | KRAS               | MODERATE                   | c.38G>A                                                   | p.Gly13Asp                                                    | 4010 | FALSE | chr12:253<br>98281:C:T      | 176:chr12:<br>25398281:<br>C:T  | 0.005158 |
| 56_bl-2 | 56 | EGFR               | MODERATE                   | c.494G>A                                                  | p.Arg165Gln                                                   | 3    | FALSE | chr7:5521<br>4368:G:A       | 176:chr7:5<br>5214368:G<br>:A   | 0.001874 |
| 56_bl-2 | 56 | SMO                | MODERATE                   | c.1045A>C                                                 | p.Thr349Pro                                                   | 0    | FALSE | chr7:1288<br>46115:A:C      | 176:chr7:1<br>28846115:<br>A:C  | 0.004605 |
| 56_bl-2 | 56 | TP53               | MODERATE; MODIFIER         | c.115G>T;<br>c.232G>T;<br>c.-279G>T;<br>c.-360G>T         | p.Ala39Ser;<br>p.Ala78Ser;                                    | 1    | FALSE | chr17:757<br>9455:C:A       | 176:chr17:<br>7579455:C<br>:A   | 0.002722 |
| 56_bl-2 | 56 | NF1                | MODERATE                   | c.2695T>G                                                 | p.Leu899Val                                                   | 3    | FALSE | chr17:295<br>56328:T:G      | 176:chr17:<br>29556328:<br>T:G  | 0.001587 |
| 56_bl-2 | 56 | TP53               | MODERATE                   | c.167G>T;<br>c.248G>T;<br>c.527G>T;<br>c.644G>T           | p.Ser56Ile;<br>p.Ser83Ile;<br>p.Ser176Ile;<br>p.Ser215Ile     | 20   | FALSE | chr17:757<br>8205:C:A       | 176:chr17:<br>7578205:C<br>:A   | 0.00183  |
| 24_c2-1 | 24 | CDH1               | MODERATE                   | c.856G>A                                                  | p.Ala286Thr                                                   | 0    | FALSE | chr16:688<br>45610:G:A      | 177:chr16:<br>68845610:<br>G:A  | 0.002491 |
| 24_c2-1 | 24 | RET                | MODERATE                   | c.2116G>A                                                 | p.Val706Met                                                   | 2    | FALSE | chr10:436<br>10164:G:A      | 177:chr10:<br>43610164:<br>G:A  | 0.002655 |



|         |    |                                      |                    |                                                                                                   |                                                                         |      |       |                             |                                 |          |
|---------|----|--------------------------------------|--------------------|---------------------------------------------------------------------------------------------------|-------------------------------------------------------------------------|------|-------|-----------------------------|---------------------------------|----------|
| 24_c2-1 | 24 | PDGFRA                               | MODERATE           | c.1711G>A                                                                                         | p.Glu571Lys                                                             | 1    | FALSE | chr4:5514<br>1065:G:A       | 177:chr4:5<br>5141065:G<br>:A   | 0.002165 |
| 24_c2-1 | 24 | PTEN                                 | MODERATE           | c.389G>A                                                                                          | p.Arg130Gln                                                             | 89   | FALSE | chr10:896<br>92905:G:A      | 177:chr10:<br>89692905:<br>G:A  | 0.002062 |
| 24_c2-1 | 24 | TP53                                 | MODIFIER; MODERATE | c.*137A>G<br>;<br>c.*225A>G<br>;<br>c.1001A>G<br>;<br>c.1118A>G<br>;<br>c.641A>G<br>;<br>c.722A>G | p.Lys334Arg<br>;<br>p.Lys373Arg<br>;<br>p.Lys214Arg<br>;<br>p.Lys241Arg | 1    | FALSE | chr17:757<br>2991:T:C       | 177:chr17:<br>7572991:T<br>:C   | 0.017945 |
| 24_c2-1 | 24 | KRAS                                 | MODERATE           | c.34G>T                                                                                           | p.Gly12Cys                                                              | 3755 | FALSE | chr12:253<br>98285:C:A      | 177:chr12:<br>25398285:<br>C:A  | 0.025404 |
| 24_c2-1 | 24 | MIR4674;<br>MIR4674H<br>G;<br>NOTCH1 | MODIFIER; MODERATE | n.*87G>T;<br>n.-1C>A;<br>c.62G>T                                                                  | p.Gly21Val                                                              | 0    | FALSE | chr9:1394<br>38554:C:A      | 177:chr9:1<br>39438554:<br>C:A  | 0.003861 |
| 24_c2-1 | 24 | SMO                                  | MODERATE           | c.469G>A                                                                                          | p.Val157Met                                                             | 0    | FALSE | chr7:1288<br>43362:G:A      | 177:chr7:1<br>28843362:<br>G:A  | 0.002039 |
| 24_c2-1 | 24 | NOTCH1                               | MODERATE           | c.4987C>T                                                                                         | p.Arg1663Trp                                                            | 0    | FALSE | chr9:1393<br>99156:G:A      | 177:chr9:1<br>39399156:<br>G:A  | 0.002649 |
| 24_c2-1 | 24 | ROS1                                 | HIGH               | c.5209G>T                                                                                         | p.Glu1737*                                                              | 2    | FALSE | chr6:1176<br>58374:C:A      | 177:chr6:1<br>17658374:<br>C:A  | 0.002151 |
| 24_c2-1 | 24 | RET                                  | MODERATE           | c.1907C>T                                                                                         | p.Thr636Met                                                             | 1    | FALSE | chr10:436<br>09955:C:T      | 177:chr10:<br>43609955:<br>C:T  | 0.001974 |
| 24_c2-1 | 24 | ATM                                  | MODERATE           | c.1237C>A                                                                                         | p.Leu413Ile                                                             | 0    | FALSE | chr11:108<br>121429:C:<br>A | 177:chr11:<br>10812142<br>9:C:A | 0.001912 |
| 24_c2-1 | 24 | FBXW7                                | HIGH               | c.1027G>T<br>;<br>c.1267G>T<br>;<br>c.913G>T                                                      | p.Gly343*;<br>p.Gly423*;<br>p.Gly305*                                   | 0    | FALSE | chr4:1532<br>49511:C:A      | 177:chr4:1<br>53249511:<br>C:A  | 0.002356 |
| 24_c2-1 | 24 | TP53                                 | MODIFIER; MODERATE | c.-75T>A;<br>c.286T>A;<br>c.403T>A;<br>c.7T>A                                                     | p.Cys96Ser;<br>p.Cys135Ser<br>; p.Cys3Ser                               | 12   | FALSE | chr17:757<br>8527:A:T       | 177:chr17:<br>7578527:A<br>:T   | 0.004459 |
| 24_c2-1 | 24 | EGFR                                 | MODERATE           | c.493C>T                                                                                          | p.Arg165Trp                                                             | 1    | FALSE | chr7:5521<br>4367:C:T       | 177:chr7:5<br>5214367:C<br>:T   | 0.002105 |
| 24_c2-1 | 24 | ATM                                  | MODERATE           | c.1477C>T                                                                                         | p.Arg493Cys                                                             | 0    | FALSE | chr11:108<br>121669:C:<br>T | 177:chr11:<br>10812166<br>9:C:T | 0.002283 |
| 24_c2-1 | 24 | PHLPP1                               | MODERATE           | c.2303C>A                                                                                         | p.Ser768Tyr                                                             | 0    | FALSE | chr18:605<br>63103:C:A      | 177:chr18:<br>60563103:<br>C:A  | 0.002451 |

|         |    |        |                    |                                                                               |                                                             |       |       |                     |                         |          |
|---------|----|--------|--------------------|-------------------------------------------------------------------------------|-------------------------------------------------------------|-------|-------|---------------------|-------------------------|----------|
| 24_c2-1 | 24 | CTNNB1 | MODERATE           | c.884C>A                                                                      | p.Ala295Asp                                                 | 0     | FALSE | chr3:41267300:C:A   | 177:chr3:41267300:C:A   | 0.002307 |
| 24_c2-1 | 24 | APC    | MODIFIER; MODERATE | c.676-8791C>T;<br>c.688C>T                                                    | p.Arg230Cys                                                 | 0     | FALSE | chr5:112128185:C:T  | 177:chr5:112128185:C:T  | 0.002265 |
| 24_c2-1 | 24 | NOTCH1 | MODERATE           | c.4918G>A                                                                     | p.Ala1640Thr                                                | 0     | FALSE | chr9:139399225:C:T  | 177:chr9:139399225:C:T  | 0.002558 |
| 40_bl-2 | 40 | ATM    | MODERATE           | c.1009C>T                                                                     | p.Arg337Cys                                                 | 0     | FALSE | chr11:108117798:C:T | 178:chr11:108117798:C:T | 0.00625  |
| 40_bl-2 | 40 | TP53   | MODIFIER; MODERATE | c.*137A>G;<br>c.*225A>G;<br>c.1001A>G;<br>c.1118A>G;<br>c.641A>G;<br>c.722A>G | p.Lys334Arg;<br>p.Lys373Arg;<br>p.Lys214Arg;<br>p.Lys241Arg | 1     | FALSE | chr17:7572991:T:C   | 178:chr17:7572991:T:C   | 0.013699 |
| 40_bl-2 | 40 | KRAS   | MODERATE           | c.40G>A                                                                       | p.Val14Ile                                                  | 22    | FALSE | chr12:25398279:C:T  | 178:chr12:25398279:C:T  | 0.00939  |
| 40_bl-2 | 40 | TP53   | MODERATE           | c.270G>T;<br>c.351G>T;<br>c.630G>T;<br>c.747G>T                               | p.Arg90Ser;<br>p.Arg117Ser;<br>p.Arg210Ser;<br>p.Arg249Ser  | 318   | FALSE | chr17:757534:C:A    | 178:chr17:757534:C:A    | 0.027211 |
| 40_bl-2 | 40 | EGFR   | MODERATE           | c.493C>T                                                                      | p.Arg165Trp                                                 | 1     | FALSE | chr7:55214367:C:T   | 178:chr7:55214367:C:T   | 0.52193  |
| 40_bl-2 | 40 | ALK    | MODERATE           | c.3089A>C                                                                     | p.His1030Pro                                                | 15    | TRUE  | chr2:29448410:T:G   | 178:chr2:29448410:T:G   | 0.14094  |
| 40_bl-2 | 40 | MET    | MODERATE           | c.3583C>T;<br>c.3637C>T                                                       | p.Leu1195Phe;<br>p.Leu1213Phe                               | 1     | FALSE | chr7:116422102:C:T  | 178:chr7:116422102:C:T  | 0.010363 |
| 40_bl-2 | 40 | KRAS   | MODERATE           | c.35G>T                                                                       | p.Gly12Val                                                  | 11213 | FALSE | chr12:25398284:C:A  | 178:chr12:25398284:C:A  | 0.060185 |
| 49_c5-b | 49 | TP53   | MODERATE           | c.364G>A;<br>c.481G>A;<br>c.4G>A;<br>c.85G>A                                  | p.Ala122Thr;<br>p.Ala161Thr;<br>p.Ala2Thr;<br>p.Ala29Thr    | 53    | FALSE | chr17:7578449:C:T   | 179:chr17:7578449:C:T   | 0.001536 |
| 49_c5-b | 49 | CTNNB1 | MODERATE           | c.98C>A                                                                       | p.Ser33Tyr                                                  | 0     | FALSE | chr3:41266101:C:A   | 179:chr3:41266101:C:A   | 0.001953 |
| 49_c5-b | 49 | PTEN   | MODERATE           | c.731C>A                                                                      | p.Pro244His                                                 | 2     | FALSE | chr10:89717706:C:A  | 179:chr10:89717706:C:A  | 0.002158 |

|         |    |                    |                    |                                                                                             |                                             |     |       |                     |                         |          |
|---------|----|--------------------|--------------------|---------------------------------------------------------------------------------------------|---------------------------------------------|-----|-------|---------------------|-------------------------|----------|
| 49_c5-b | 49 | EV12A; NF1         | MODIFIER; MODERATE | c.-266C>T; ;<br>c.-338C>T; p.Arg1632His;<br>c.4895G>A; ;<br>p.Arg1653His<br>c.4958G>A       |                                             | 1   | FALSE | chr17:29652960:G:A  | 179:chr17:29652960:G:A  | 0.00113  |
| 49_c5-b | 49 | TP53               | MODIFIER; MODERATE | c.-9G>T; ;<br>c.352G>T; ;<br>c.469G>T; p.Val118Phe;<br>c.73G>T; p.Val157Phe<br>; p.Val25Phe |                                             | 169 | FALSE | chr17:7578461:C:A   | 179:chr17:7578461:C:A   | 0.001533 |
| 49_c5-b | 49 | KDR                | MODERATE           | c.887G>T                                                                                    | p.Gly296Val                                 | 2   | FALSE | chr4:55979560:C:A   | 179:chr4:55979560:C:A   | 0.002309 |
| 49_c5-b | 49 | EGFR;<br>EGFR-AS1  | MODERATE; MODIFIER | c.2441T>C; p.Leu814Pro;<br>n.1121A>G                                                        |                                             | 4   | FALSE | chr7:55249143:T:C   | 179:chr7:55249143:T:C   | 0.001906 |
| 49_c5-b | 49 | NTRK1              | MODERATE           | c.804C>G; ;<br>c.894C>G                                                                     | p.His268Gln<br>; p.His298Gln                | 1   | FALSE | chr1:156843468:C:G  | 179:chr1:156843468:C:G  | 0.001691 |
| 49_c5-b | 49 | PIK3CA             | MODERATE           | c.518C>A                                                                                    | p.Ser173Tyr                                 | 1   | FALSE | chr3:178917643:C:A  | 179:chr3:178917643:C:A  | 0.001145 |
| 49_c5-b | 49 | TSC2               | MODERATE           | c.1654G>A                                                                                   | p.Ala552Thr                                 | 0   | FALSE | chr16:2115574:G:A   | 179:chr16:2115574:G:A   | 0.001498 |
| 49_c5-b | 49 | ATM                | MODERATE           | c.4466G>A                                                                                   | p.Arg1489His                                | 0   | FALSE | chr11:108163375:G:A | 179:chr11:108163375:G:A | 0.001225 |
| 49_c5-b | 49 | FGFR4              | MODERATE           | c.1444G>A; ;<br>c.1528G>A; ;<br>c.1648G>A                                                   | p.Val482Met;<br>p.Val510Met;<br>p.Val550Met | 2   | FALSE | chr5:176522551:G:A  | 179:chr5:176522551:G:A  | 0.001672 |
| 49_c5-b | 49 | FGFR2              | MODIFIER; MODERATE | c.110-14054G>T; ;<br>c.110-934G>T; ;<br>n.757-14054G>T; ;<br>c.301G>T                       | p.Asp101Tyr                                 | 3   | FALSE | chr10:123325027:C:A | 179:chr10:123325027:C:A | 0.0013   |
| 49_c5-b | 49 | MIR4673;<br>NOTCH1 | MODIFIER; MODERATE | n.*59G>T; ;<br>c.1286G>T                                                                    | p.Cys429Phe                                 | 0   | FALSE | chr9:139412359:C:A  | 179:chr9:139412359:C:A  | 0.002255 |
| 49_c5-b | 49 | FBXW7              | HIGH               | c.1069G>T; ;<br>c.1309G>T; ;<br>c.955G>T                                                    | p.Gly357*;<br>p.Gly437*;<br>p.Gly319*       | 0   | FALSE | chr4:153249469:C:A  | 179:chr4:153249469:C:A  | 0.00135  |

|         |    |        |                |                                                  |                                                             |   |       |                    |                        |          |
|---------|----|--------|----------------|--------------------------------------------------|-------------------------------------------------------------|---|-------|--------------------|------------------------|----------|
| 49_c5-b | 49 | NOTCH1 | MODERATE       | c.5347C>T                                        | p.Arg1783Trp                                                | 0 | FALSE | chr9:139396761:G:A | 179:chr9:139396761:G:A | 0.001881 |
| 49_c5-b | 49 | MET    | MODERATE       | c.3973G>A;<br>c.4027G>A                          | p.Glu1325Lys;<br>p.Glu1343Lys                               | 1 | FALSE | chr7:116435978:G:A | 179:chr7:116435978:G:A | 0.001291 |
| 49_c5-b | 49 | KDR    | MODERATE       | c.2075G>T                                        | p.Gly692Val                                                 | 1 | FALSE | chr4:55968588:C:A  | 179:chr4:55968588:C:A  | 0.001726 |
| 49_c5-b | 49 | RAC1   | MODERATE       | c.203G>A                                         | p.Arg68His                                                  | 0 | FALSE | chr7:6431650:G:A   | 179:chr7:6431650:G:A   | 0.001563 |
| 49_c5-b | 49 | KIT    | MODERATE       | c.235C>A                                         | p.Gln79Lys                                                  | 2 | FALSE | chr4:55561845:C:A  | 179:chr4:55561845:C:A  | 0.001705 |
| 49_c5-b | 49 | IGF1R  | MODERATE       | c.3905T>C;<br>c.3908T>C                          | p.Val1302Ala;<br>p.Val1303Ala                               | 0 | FALSE | chr15:99500475:T:C | 179:chr15:99500475:T:C | 0.003751 |
| 49_c5-b | 49 | FBXW7  | MODERATE       | c.1084G>T;<br>c.1198G>T;<br>c.1438G>T            | p.Asp362Tyr;<br>p.Asp400Tyr;<br>p.Asp480Tyr                 | 0 | FALSE | chr4:153247364:C:A | 179:chr4:153247364:C:A | 0.00116  |
| 49_c5-b | 49 | TP53   | HIGH; MODIFIER | c.184G>T;<br>c.67G>T; c.279G>T; c.360G>T         | p.Glu62*;<br>p.Glu23*                                       | 8 | FALSE | chr17:7579503:C:A  | 179:chr17:7579503:C:A  | 0.001857 |
| 49_c5-b | 49 | PIK3R1 | MODERATE       | c.1508G>A;<br>c.419G>A;<br>c.608G>A;<br>c.698G>A | p.Arg503Gln;<br>p.Arg140Gln;<br>p.Arg203Gln;<br>p.Arg233Gln | 2 | FALSE | chr5:67590446:G:A  | 179:chr5:67590446:G:A  | 0.001343 |
| 49_c5-b | 49 | KIT    | HIGH           | c.1698C>A;<br>c.1710C>A                          | p.Tyr566*;<br>p.Tyr570*                                     | 2 | FALSE | chr4:55593644:C:A  | 179:chr4:55593644:C:A  | 0.00147  |
| 49_c5-b | 49 | NTRK2  | MODERATE       | c.2017G>A;<br>c.2065G>A                          | p.Val673Met;<br>p.Val689Met                                 | 0 | FALSE | chr9:87570325:G:A  | 179:chr9:87570325:G:A  | 0.001465 |
| 49_c5-b | 49 | KIT    | MODERATE       | c.365G>A                                         | p.Arg122His                                                 | 1 | FALSE | chr4:55564477:G:A  | 179:chr4:55564477:G:A  | 0.001347 |
| 49_c5-b | 49 | PTEN   | MODERATE       | c.379G>A                                         | p.Gly127Arg                                                 | 6 | FALSE | chr10:89692895:G:A | 179:chr10:89692895:G:A | 0.001256 |
| 49_c5-b | 49 | PDGFRA | MODERATE       | c.1526C>A                                        | p.Ala509Asp                                                 | 1 | FALSE | chr4:55139865:C:A  | 179:chr4:55139865:C:A  | 0.002247 |

|         |    |                    |                    |                                                                                                                                           |                                                     |    |       |                             |                                 |          |
|---------|----|--------------------|--------------------|-------------------------------------------------------------------------------------------------------------------------------------------|-----------------------------------------------------|----|-------|-----------------------------|---------------------------------|----------|
| 49_c5-b | 49 | FBXW7              | MODERATE           | c.1444G>T<br>;<br>c.1558G>T<br>;<br>c.1798G>T                                                                                             | p.Asp482Tyr<br>;<br>p.Asp520Tyr<br>;<br>p.Asp600Tyr | 0  | FALSE | chr4:1532<br>45393:C:A      | 179:chr4:1<br>53245393:<br>C:A  | 0.001298 |
| 49_c5-b | 49 | PTEN               | HIGH               | c.720C>A                                                                                                                                  | p.Tyr240*                                           | 3  | FALSE | chr10:897<br>17695:C:A      | 179:chr10:<br>89717695:<br>C:A  | 0.002147 |
| 49_c5-b | 49 | FGFR2              | MODIFIER; MODERATE | c.1087+12<br>22G>A;<br>c.749-<br>2141G>A;<br>c.820+122<br>2G>A;<br>c.939+251<br>9G>A;<br>c.598G>A;<br>c.676G>A;<br>c.943G>A;<br>n.1393G>A | p.Ala200Thr<br>;<br>p.Ala226Thr<br>;<br>p.Ala315Thr | 1  | FALSE | chr10:123<br>276974:C:<br>T | 179:chr10:<br>12327697<br>4:C:T | 0.001775 |
| 49_c5-b | 49 | IGF1R              | MODERATE           | c.1784G>A                                                                                                                                 | p.Arg595His                                         | 0  | FALSE | chr15:994<br>56467:G:A      | 179:chr15:<br>99456467:<br>G:A  | 0.00128  |
| 49_c5-b | 49 | TP53               | MODIFIER; MODERATE | c.-5G>T;<br>c.356G>T;<br>c.473G>T;<br>c.77G>T                                                                                             | p.Arg119Leu<br>;<br>p.Arg158Leu<br>;<br>p.Arg26Leu  | 80 | FALSE | chr17:757<br>8457:C:A       | 179:chr17:<br>7578457:C<br>:A   | 0.001541 |
| 49_c5-b | 49 | SMO                | MODERATE           | c.1684C>T                                                                                                                                 | p.Arg562Trp                                         | 0  | FALSE | chr7:1288<br>50837:C:T      | 179:chr7:1<br>28850837:<br>C:T  | 0.001331 |
| 49_c5-b | 49 | APC                | HIGH               | c.350C>A;<br>c.380C>A                                                                                                                     | p.Ser117*;<br>p.Ser127*                             | 0  | FALSE | chr5:1121<br>03015:C:A      | 179:chr5:1<br>12103015:<br>C:A  | 0.002292 |
| 49_c5-b | 49 | MIR4673;<br>NOTCH1 | MODIFIER; MODERATE | n.-1G>T;<br>c.221G>T                                                                                                                      | p.Cys74Phe                                          | 0  | FALSE | chr9:1394<br>18351:C:A      | 179:chr9:1<br>39418351:<br>C:A  | 0.003359 |
| 49_c5-b | 49 | PTEN               | MODERATE           | c.443C>A                                                                                                                                  | p.Ala148Glu                                         | 1  | FALSE | chr10:896<br>92959:C:A      | 179:chr10:<br>89692959:<br>C:A  | 0.001459 |
| 49_c5-b | 49 | ALK                | MODERATE           | c.2629G>T                                                                                                                                 | p.Ala877Ser                                         | 1  | FALSE | chr2:2945<br>5173:C:A       | 179:chr2:2<br>9455173:C<br>:A   | 0.002412 |
| 49_c5-b | 49 | NTRK3              | MODERATE           | c.1393G>T<br>;<br>c.1417G>T                                                                                                               | p.Gly465Cys<br>;<br>p.Gly473Cys                     | 0  | FALSE | chr15:885<br>76256:C:A      | 179:chr15:<br>88576256:<br>C:A  | 0.001901 |

|         |    |                             |                    |                                                                                                                      |                                                |   |       |                     |                         |          |
|---------|----|-----------------------------|--------------------|----------------------------------------------------------------------------------------------------------------------|------------------------------------------------|---|-------|---------------------|-------------------------|----------|
| 49_c5-b | 49 | ERBB2;<br>MIEN1;<br>MIR4728 | MODIFIER; MODERATE | c.3160-319G>A;<br>c.3145G>A;<br>;<br>c.3190G>A;<br>;<br>c.3235G>A;<br>;<br>n.3559G>A;<br>;<br>c.*388C>T;<br>n.*67G>A | p.Glu1049Lys;<br>p.Glu1064Lys;<br>p.Glu1079Lys | 1 | FALSE | chr17:37883623:G:A  | 179:chr17:37883623:G:A  | 0.00177  |
| 49_c5-b | 49 | CDH1                        | MODERATE           | c.1223C>A                                                                                                            | p.Ala408Glu                                    | 0 | FALSE | chr16:68847301:C:A  | 179:chr16:68847301:C:A  | 0.00128  |
| 49_c5-b | 49 | HGF                         | MODERATE           | c.251G>T                                                                                                             | p.Cys84Phe                                     | 0 | FALSE | chr7:81392026:C:A   | 179:chr7:81392026:C:A   | 0.001661 |
| 49_c5-b | 49 | EGFR                        | MODIFIER; MODERATE | c.*2133C>T;<br>c.*2364C>T;<br>c.2011C>T                                                                              | p.Arg671Cys                                    | 2 | FALSE | chr7:55240767:C:T   | 179:chr7:55240767:C:T   | 0.002339 |
| 49_c5-b | 49 | ATM                         | MODERATE           | c.6751C>A                                                                                                            | p.Leu2251Ile                                   | 0 | FALSE | chr11:108196215:C:A | 179:chr11:108196215:C:A | 0.001465 |
| 49_c5-b | 49 | PIK3CA                      | MODERATE           | c.2727C>A                                                                                                            | p.Phe909Leu                                    | 1 | FALSE | chr3:178947852:C:A  | 179:chr3:178947852:C:A  | 0.001341 |
| 49_c5-b | 49 | HGF                         | MODERATE           | c.5G>T                                                                                                               | p.Trp2Leu                                      | 0 | FALSE | chr7:81399283:C:A   | 179:chr7:81399283:C:A   | 0.001337 |
| 49_c5-b | 49 | HGF                         | HIGH               | c.1993G>T;<br>c.2008G>T                                                                                              | p.Glu665*;<br>p.Glu670*                        | 0 | FALSE | chr7:81334708:C:A   | 179:chr7:81334708:C:A   | 0.001305 |
| 49_c5-b | 49 | EGFR;<br>EGFR-AS1           | MODERATE; MODIFIER | c.2568T>G;<br>n.-1A>C                                                                                                | p.Phe856Leu                                    | 1 | FALSE | chr7:55259510:T:G   | 179:chr7:55259510:T:G   | 0.00158  |
| 49_c5-b | 49 | FBXW7                       | MODERATE           | c.1078G>T;<br>;<br>c.1318G>T;<br>; c.964G>T                                                                          | p.Asp360Tyr;<br>p.Asp440Tyr;<br>p.Asp322Tyr    | 0 | FALSE | chr4:153249460:C:A  | 179:chr4:153249460:C:A  | 0.001387 |
| 49_c5-b | 49 | C9orf53;<br>CDKN2A          | MODIFIER; MODERATE | n.*616A>C;<br>;<br>c.*137T>G;<br>;<br>c.214T>G;<br>c.257T>G                                                          | p.Cys72Gly;<br>p.Leu86Arg                      | 1 | FALSE | chr9:21971144:A:C   | 179:chr9:21971144:A:C   | 0.018104 |

|         |    |        |                    |                                                 |                                                           |     |       |                             |                                 |          |
|---------|----|--------|--------------------|-------------------------------------------------|-----------------------------------------------------------|-----|-------|-----------------------------|---------------------------------|----------|
| 49_c5-b | 49 | TP53   | MODERATE           | c.119G>T;<br>c.200G>T;<br>c.479G>T;<br>c.596G>T | p.Gly40Val;<br>p.Gly67Val;<br>p.Gly160Val;<br>p.Gly199Val | 11  | FALSE | chr17:757<br>8253:C:A       | 179:chr17:<br>7578253:C<br>:A   | 0.001409 |
| 49_c5-b | 49 | HGF    | MODERATE           | c.6G>T                                          | p.Trp2Cys                                                 | 0   | FALSE | chr7:8139<br>9282:C:A       | 179:chr7:8<br>1399282:C<br>:A   | 0.001332 |
| 49_c5-b | 49 | CTNNB1 | MODERATE           | c.134C>A                                        | p.Ser45Tyr                                                | 0   | FALSE | chr3:4126<br>6137:C:A       | 179:chr3:4<br>1266137:C<br>:A   | 0.001252 |
| 49_c5-b | 49 | TP53   | MODIFIER; MODERATE | c.-3G>T;<br>c.358G>T;<br>c.475G>T;<br>c.79G>T   | p.Ala120Ser;<br>p.Ala159Ser;<br>p.Ala27Ser                | 23  | FALSE | chr17:757<br>8455:C:A       | 179:chr17:<br>7578455:C<br>:A   | 0.001527 |
| 49_c5-b | 49 | ATM    | MODERATE           | c.6503C>T                                       | p.Ser2168Le<br>u                                          | 0   | FALSE | chr11:108<br>192078:C:<br>T | 179:chr11:<br>10819207<br>8:C:T | 0.00144  |
| 49_c5-b | 49 | ATM    | MODERATE           | c.2075G>A                                       | p.Arg692His                                               | 0   | FALSE | chr11:108<br>124717:G:<br>A | 179:chr11:<br>10812471<br>7:G:A | 0.001279 |
| 69_c2-1 | 69 | TP53   | MODIFIER; MODERATE | c.-9G>T;<br>c.352G>T;<br>c.469G>T;<br>c.73G>T   | p.Val118Phe<br>;<br>p.Val157Phe<br>;<br>p.Val25Phe        | 169 | FALSE | chr17:757<br>8461:C:A       | 180:chr17:<br>7578461:C<br>:A   | 0.001876 |
| 69_c2-1 | 69 | IGF1R  | MODERATE           | c.2824G>A<br>;<br>c.2827G>A                     | p.Ala942Thr<br>;<br>p.Ala943Thr                           | 0   | FALSE | chr15:994<br>72831:G:A      | 180:chr15:<br>99472831:<br>G:A  | 0.001647 |
| 69_c2-1 | 69 | FGFR2  | MODERATE; MODIFIER | c.262C>A;<br>c.340C>A;<br>c.607C>A;<br>n.909C>A | p.Arg88Ser;<br>p.Arg114Ser<br>;<br>p.Arg203Ser<br>;       | 2   | FALSE | chr10:123<br>310821:G:<br>T | 180:chr10:<br>12331082<br>1:G:T | 0.0022   |
| 69_c2-1 | 69 | NTRK1  | MODERATE           | c.804C>G;<br>c.894C>G                           | p.His268Gln<br>;<br>p.His298Gln                           | 1   | FALSE | chr1:1568<br>43468:C:G      | 180:chr1:1<br>56843468:<br>C:G  | 0.004008 |
| 69_c2-1 | 69 | EPHA3  | MODERATE           | c.1543G>A                                       | p.Ala151Thr                                               | 0   | FALSE | chr3:8944<br>8579:G:A       | 180:chr3:8<br>9448579:G<br>:A   | 0.003633 |
| 69_c2-1 | 69 | EPHA3  | MODERATE           | c.2734A>G                                       | p.Thr912Ala                                               | 0   | FALSE | chr3:8952<br>1657:A:G       | 180:chr3:8<br>9521657:A<br>:G   | 0.001805 |
| 69_c2-1 | 69 | CTNNB1 | MODERATE           | c.98C>A                                         | p.Ser33Tyr                                                | 0   | FALSE | chr3:4126<br>6101:C:A       | 180:chr3:4<br>1266101:C<br>:A   | 0.002383 |

|         |    |       |                    |                                                              |                                                             |    |       |                             |                                 |          |
|---------|----|-------|--------------------|--------------------------------------------------------------|-------------------------------------------------------------|----|-------|-----------------------------|---------------------------------|----------|
| 69_c2-1 | 69 | FBXW7 | MODERATE           | c.1241C>A<br>;<br>c.1355C>A<br>;<br>c.1595C>A                | p.Thr414Asn<br>;<br>p.Thr452Asn<br>;<br>p.Thr532Asn         | 0  | FALSE | chr4:1532<br>47207:G:T      | 180:chr4:1<br>53247207:<br>G:T  | 0.002586 |
| 69_c2-1 | 69 | TP53  | MODERATE; MODIFIER | c.100G>T;<br>c.217G>T;<br>c.-279G>T;<br>c.-360G>T            | p.Val34Leu;<br>p.Val73Leu;                                  | 5  | FALSE | chr17:757<br>9470:C:A       | 180:chr17:<br>7579470:C<br>:A   | 0.002039 |
| 69_c2-1 | 69 | TP53  | MODIFIER; HIGH     | c.-104A>G;<br>c.-23A>G;<br>c.259-<br>2A>G;<br>c.376-<br>2A>G |                                                             | 19 | FALSE | chr17:757<br>8556:T:C       | 180:chr17:<br>7578556:T<br>:C   | 0.003968 |
| 69_c2-1 | 69 | NTRK1 | MODERATE           | c.1768C>A<br>;<br>c.1858C>A<br>;<br>c.1876C>A                | p.Gln590Lys<br>;<br>p.Gln620Lys<br>;<br>p.Gln626Lys         | 1  | FALSE | chr1:1568<br>48984:C:A      | 180:chr1:1<br>56848984:<br>C:A  | 0.001671 |
| 69_c2-1 | 69 | FGFR4 | MODERATE           | c.1699C>A<br>;<br>c.1783C>A<br>;<br>c.1903C>A                | p.Arg567Ser<br>;<br>p.Arg595Ser<br>;<br>p.Arg635Ser         | 2  | FALSE | chr5:1765<br>23139:C:A      | 180:chr5:1<br>76523139:<br>C:A  | 0.002181 |
| 69_c2-1 | 69 | TP53  | MODERATE           | c.349G>T;<br>c.430G>T;<br>c.709G>T;<br>c.826G>T              | p.Ala117Ser;<br>p.Ala144Ser;<br>p.Ala237Ser;<br>p.Ala276Ser | 16 | FALSE | chr17:757<br>7112:C:A       | 180:chr17:<br>7577112:C<br>:A   | 0.001855 |
| 69_c2-1 | 69 | AKT1  | MODERATE           | c.361C>T                                                     | p.Arg121Trp                                                 | 2  | FALSE | chr14:105<br>242063:G:<br>A | 180:chr14:<br>10524206<br>3:G:A | 0.001538 |
| 69_c2-1 | 69 | EGFR  | MODIFIER; MODERATE | c.*1464G><br>A;<br>c.1321G>A                                 | p.Val441Ile                                                 | 1  | FALSE | chr7:5522<br>7854:G:A       | 180:chr7:5<br>5227854:G<br>:A   | 0.001843 |
| 69_c2-1 | 69 | CDH1  | MODERATE           | c.1489G>A                                                    | p.Glu497Lys                                                 | 0  | FALSE | chr16:688<br>49586:G:A      | 180:chr16:<br>68849586:<br>G:A  | 0.001577 |
| 69_c2-1 | 69 | TP53  | MODIFIER; MODERATE | c.-11G>T;<br>c.350G>T;<br>c.467G>T;<br>c.71G>T               | p.Arg117Leu<br>;<br>p.Arg156Leu<br>;<br>p.Arg24Leu          | 26 | FALSE | chr17:757<br>8463:C:A       | 180:chr17:<br>7578463:C<br>:A   | 0.001859 |
| 69_c2-1 | 69 | ALK   | MODERATE           | c.2306A>G                                                    | p.Asp769Gly                                                 | 1  | FALSE | chr2:2946<br>2595:T:C       | 180:chr2:2<br>9462595:T<br>:C   | 0.001612 |



|           |    |                    |                    |                                                                                               |                                                                    |    |       |                             |                                 |          |
|-----------|----|--------------------|--------------------|-----------------------------------------------------------------------------------------------|--------------------------------------------------------------------|----|-------|-----------------------------|---------------------------------|----------|
| 69_c2-1   | 69 | HGF                | MODERATE           | c.1435G>A<br>;<br>c.1450G>A                                                                   | p.Val479Ile;<br>p.Val484Ile                                        | 0  | FALSE | chr7:8133<br>9554:C:T       | 180:chr7:8<br>1339554:C<br>:T   | 0.001898 |
| 69_c2-1   | 69 | C9orf53;<br>CDKN2A | MODIFIER; MODERATE | n.*616A>C<br>;<br>c.*137T>G<br>;<br>c.214T>G;<br>c.257T>G                                     | p.Cys72Gly;<br>p.Leu86Arg                                          | 1  | FALSE | chr9:2197<br>1144:A:C       | 180:chr9:2<br>1971144:A<br>:C   | 0.010681 |
| 69_c2-1   | 69 | TP53               | MODIFIER; MODERATE | c.*137A>G<br>;<br>c.*225A>G<br>;<br>c.1001A>G<br>;<br>c.1118A>G<br>;<br>c.641A>G;<br>c.722A>G | p.Lys334Arg<br>;<br>p.Lys373Arg<br>;<br>p.Lys214Arg<br>p.Lys241Arg | 1  | FALSE | chr17:757<br>2991:T:C       | 180:chr17:<br>7572991:T<br>:C   | 0.018846 |
| 69_c2-1   | 69 | ATM                | HIGH               | c.5623C>T                                                                                     | p.Arg1875*                                                         | 0  | FALSE | chr11:108<br>175528:C:<br>T | 180:chr11:<br>10817552<br>8:C:T | 0.002708 |
| 83_c1bl-1 | 83 | CDH1               | MODERATE           | c.2074G>A                                                                                     | p.Ala692Thr                                                        | 0  | FALSE | chr16:688<br>57439:G:A      | 183:chr16:<br>68857439:<br>G:A  | 0.00093  |
| 83_c1bl-1 | 83 | NOTCH1             | MODERATE           | c.5011G>A                                                                                     | p.Val1671Ile                                                       | 0  | FALSE | chr9:1393<br>99132:C:T      | 183:chr9:1<br>39399132:<br>C:T  | 0.475225 |
| 83_c1bl-1 | 83 | IGF1R              | MODERATE           | c.3934T>C;<br>c.3937T>C                                                                       | p.Ser1312Pro;<br>p.Ser1313Pro                                      | 0  | FALSE | chr15:995<br>00504:T:C      | 183:chr15:<br>99500504:<br>T:C  | 0.009824 |
| 83_c1bl-1 | 83 | TP53               | MODIFIER; MODERATE | c.-17G>T;<br>c.344G>T;<br>c.461G>T;<br>c.65G>T                                                | p.Gly115Val;<br>p.Gly154Val;<br>p.Gly22Val                         | 39 | FALSE | chr17:757<br>8469:C:A       | 183:chr17:<br>7578469:C<br>:A   | 0.000984 |
| 83_c1bl-1 | 83 | ATM                | MODERATE           | c.1477C>T                                                                                     | p.Arg493Cys                                                        | 0  | FALSE | chr11:108<br>121669:C:<br>T | 183:chr11:<br>10812166<br>9:C:T | 0.001034 |
| 83_c1bl-1 | 83 | PIK3CA             | MODERATE           | c.49C>T                                                                                       | p.Pro17Ser                                                         | 1  | FALSE | chr3:1789<br>16662:C:T      | 183:chr3:1<br>78916662:<br>C:T  | 0.000868 |
| 83_c1bl-1 | 83 | NF1                | HIGH               | c.3942G>A                                                                                     | p.Trp1314*                                                         | 1  | FALSE | chr17:295<br>63007:G:A      | 183:chr17:<br>29563007:<br>G:A  | 0.001349 |

|           |    |                    |                    |                                                                                                                        |                                                                         |    |       |                        |                                |          |
|-----------|----|--------------------|--------------------|------------------------------------------------------------------------------------------------------------------------|-------------------------------------------------------------------------|----|-------|------------------------|--------------------------------|----------|
| 83_c1bl-1 | 83 | CSDE1;<br>NRAS     | MODIFIER; MODERATE | c.*2430G><br>A;<br>c.*2523G><br>A;<br>c.*2817G><br>A;<br>c.*2910G><br>A;<br>c.*2964G><br>A;<br>c.*3057G><br>A; c.52G>A | p.Ala18Thr                                                              | 13 | TRUE  | chr1:1152<br>58730:C:T | 183:chr1:1<br>15258730:<br>C:T | 0.001048 |
| 83_c1bl-1 | 83 | IDH1               | MODERATE           | c.941G>A                                                                                                               | p.Arg314His                                                             | 1  | FALSE | chr2:2091<br>04637:C:T | 183:chr2:2<br>09104637:<br>C:T | 0.000945 |
| 83_c1bl-1 | 83 | IDH2               | MODIFIER; MODERATE | c.-17C>T;<br>c.-17-<br>2873C>T;<br>c.140C>T                                                                            | p.Ala47Val                                                              | 1  | FALSE | chr15:906<br>34852:G:A | 183:chr15:<br>90634852:<br>G:A | 0.001123 |
| 83_c1bl-1 | 83 | FLT3               | MODERATE           | c.393G>C                                                                                                               | p.Leu131Ph<br>e                                                         | 0  | FALSE | chr13:286<br>31575:C:G | 183:chr13:<br>28631575:<br>C:G | 0.001491 |
| 83_c1bl-1 | 83 | EPHA3              | MODERATE           | c.2530C>T                                                                                                              | p.Pro844Ser                                                             | 0  | FALSE | chr3:8949<br>9360:C:T  | 183:chr3:8<br>9499360:C<br>:T  | 0.000995 |
| 83_c1bl-1 | 83 | APC                | MODERATE           | c.1771G>A<br>;<br>c.1825G>A                                                                                            | p.Val591Ile;<br>p.Val609Ile                                             | 0  | FALSE | chr5:1121<br>70729:G:A | 183:chr5:1<br>12170729:<br>G:A | 0.497076 |
| 83_c1bl-1 | 83 | C9orf53;<br>CDKN2A | MODIFIER; MODERATE | n.*616C>G<br>;<br>c.*140G>C<br>;<br>c.217G>C;<br>c.260G>C                                                              | p.Ala73Pro;<br>p.Arg87Pro                                               | 1  | FALSE | chr9:2197<br>1141:C:G  | 183:chr9:2<br>1971141:C<br>:G  | 0.008021 |
| 83_c1bl-1 | 83 | NF1                | MODERATE           | c.4321C>T;<br>c.4384C>T                                                                                                | p.Arg1441Tr<br>p;<br>p.Arg1462Tr<br>p                                   | 1  | FALSE | chr17:295<br>86101:C:T | 183:chr17:<br>29586101:<br>C:T | 0.00098  |
| 83_c1bl-1 | 83 | TP53               | MODERATE           | c.415G>A;<br>c.496G>A;<br>c.775G>A;<br>c.892G>A                                                                        | p.Glu139Lys<br>;<br>p.Glu166Lys<br>;<br>p.Glu259Lys<br>;<br>p.Glu298Lys | 50 | FALSE | chr17:757<br>7046:C:T  | 183:chr17:<br>7577046:C<br>:T  | 0.00092  |
| 83_c1bl-1 | 83 | TP53               | MODIFIER; MODERATE | c.*145T>C;<br>c.*233T>C;<br>c.1009T>C;<br>c.1126T>C;<br>c.649T>C;<br>c.730T>C                                          | p.Ser337Pro<br>;<br>p.Ser376Pro<br>;<br>p.Ser217Pro<br>;<br>p.Ser244Pro | 2  | FALSE | chr17:757<br>2983:A:G  | 183:chr17:<br>7572983:A<br>:G  | 0.004866 |

|           |    |                           |                    |                                                                                                    |                                                                         |       |       |                        |                                |          |
|-----------|----|---------------------------|--------------------|----------------------------------------------------------------------------------------------------|-------------------------------------------------------------------------|-------|-------|------------------------|--------------------------------|----------|
| 83_c1bl-1 | 83 | PDGFRA                    | MODERATE           | c.389C>T                                                                                           | p.Pro130Leu                                                             | 2     | FALSE | chr4:5512<br>9855:C:T  | 183:chr4:5<br>5129855:C<br>:T  | 0.00095  |
| 83_c1bl-1 | 83 | KDR                       | MODERATE           | c.1040G>A                                                                                          | p.Arg347His                                                             | 4     | FALSE | chr4:5597<br>6872:C:T  | 183:chr4:5<br>5976872:C<br>:T  | 0.001255 |
| 83_c1bl-1 | 83 | KIT                       | MODERATE           | c.365G>A                                                                                           | p.Arg122His                                                             | 1     | FALSE | chr4:5556<br>4477:G:A  | 183:chr4:5<br>5564477:G<br>:A  | 0.000968 |
| 83_c1bl-1 | 83 | CDH1                      | MODERATE           | c.2053G>A                                                                                          | p.Val685Met                                                             | 0     | FALSE | chr16:688<br>57418:G:A | 183:chr16:<br>68857418:<br>G:A | 0.000933 |
| 83_c1bl-1 | 83 | NTRK2                     | MODERATE           | c.1981G>A<br>;<br>c.2029G>A                                                                        | p.Ala661Thr<br>;<br>p.Ala677Thr                                         | 0     | FALSE | chr9:8757<br>0289:G:A  | 183:chr9:8<br>7570289:G<br>:A  | 0.001021 |
| 83_c1bl-1 | 83 | NF1                       | MODERATE           | c.2695T>G                                                                                          | p.Leu899Val                                                             | 3     | FALSE | chr17:295<br>56328:T:G | 183:chr17:<br>29556328:<br>T:G | 0.003423 |
| 83_c1bl-1 | 83 | BRAF                      | MODERATE           | c.2153C>T                                                                                          | p.Ala718Val                                                             | 1     | FALSE | chr7:1404<br>34545:G:A | 183:chr7:1<br>40434545:<br>G:A | 0.001045 |
| 83_c1bl-1 | 83 | MIR1225;<br>PKD1;<br>TSC2 | MODIFIER; MODERATE | n.*90C>T;<br>c.*13118C<br>>T;<br>c.*13121C<br>>T;<br>c.4954G>A<br>;<br>c.5086G>A<br>;<br>c.5155G>A | p.Ala1652Th<br>r;<br>p.Ala1696Th<br>r;<br>p.Ala1719Th<br>r              | 0     | FALSE | chr16:213<br>8135:G:A  | 183:chr16:<br>2138135:G<br>:A  | 0.000937 |
| 83_c1bl-1 | 83 | ALK                       | MODERATE           | c.1274G>A                                                                                          | p.Cys425Tyr                                                             | 1     | FALSE | chr2:2960<br>6606:C:T  | 183:chr2:2<br>9606606:C<br>:T  | 0.001181 |
| 83_c1bl-1 | 83 | ALK                       | MODERATE           | c.3455T>C                                                                                          | p.Leu1152Pro                                                            | 1     | FALSE | chr2:2944<br>5270:A:G  | 183:chr2:2<br>9445270:A<br>:G  | 0.001784 |
| 83_c1bl-1 | 83 | TP53                      | MODERATE           | c.421C>T;<br>c.502C>T;<br>c.781C>T;<br>c.898C>T                                                    | p.Pro141Ser<br>;<br>p.Pro168Ser<br>;<br>p.Pro261Ser<br>;<br>p.Pro300Ser | 3     | FALSE | chr17:757<br>7040:G:A  | 183:chr17:<br>7577040:G<br>:A  | 0.000915 |
| 83_c1bl-1 | 83 | PIK3CA                    | MODERATE           | c.3058G>A                                                                                          | p.Ala1020Thr                                                            | 1     | FALSE | chr3:1789<br>52003:G:A | 183:chr3:1<br>78952003:<br>G:A | 0.000833 |
| 83_c1bl-1 | 83 | KRAS                      | MODERATE           | c.35G>A                                                                                            | p.Gly12Asp                                                              | 11213 | FALSE | chr12:253<br>98284:C:T | 183:chr12:<br>25398284:<br>C:T | 0.016623 |
| 83_c1bl-1 | 83 | STK11                     | MODERATE           | c.628T>C                                                                                           | p.Cys210Arg                                                             | 1     | FALSE | chr19:122<br>0610:T:C  | 183:chr19:<br>1220610:T<br>:C  | 0.004509 |
| 83_c1bl-1 | 83 | VHL                       | MODIFIER; MODERATE | c.341-<br>3270A>C;<br>c.344A>C                                                                     | p.His115Pro                                                             | 0     | FALSE | chr3:1018<br>8201:A:C  | 183:chr3:1<br>0188201:A<br>:C  | 0.002323 |

|           |    |                    |                    |                                                                             |                                                                    |    |       |                             |                                 |          |
|-----------|----|--------------------|--------------------|-----------------------------------------------------------------------------|--------------------------------------------------------------------|----|-------|-----------------------------|---------------------------------|----------|
| 83_c1bl-1 | 83 | NTRK1              | MODERATE           | c.1768C>A<br>;<br>c.1858C>A<br>;<br>c.1876C>A                               | p.Gln590Lys<br>;<br>p.Gln620Lys<br>;<br>p.Gln626Lys                | 1  | FALSE | chr1:1568<br>48984:C:A      | 183:chr1:1<br>56848984:<br>C:A  | 0.000963 |
| 83_c1bl-1 | 83 | FGFR2              | MODIFIER; MODERATE | c.110-<br>14065C>T;<br>c.110-<br>945C>T;<br>n.757-<br>14065C>T;<br>c.290C>T | ; p.Ala97Val                                                       | 1  | FALSE | chr10:123<br>325038:G:<br>A | 183:chr10:<br>12332503<br>8:G:A | 0.000951 |
| 83_c1bl-1 | 83 | KDR                | MODERATE           | c.2323G>T                                                                   | p.Ala775Ser                                                        | 1  | FALSE | chr4:5596<br>4914:C:A       | 183:chr4:5<br>5964914:C<br>:A   | 0.010496 |
| 83_c1bl-1 | 83 | KDR                | MODERATE           | c.1028C>T                                                                   | p.Thr343Met                                                        | 3  | FALSE | chr4:5597<br>6884:G:A       | 183:chr4:5<br>5976884:G<br>:A   | 0.000772 |
| 83_c1bl-1 | 83 | TP53               | MODERATE           | c.236G>A;<br>c.317G>A;<br>c.596G>A;<br>c.713G>A                             | p.Cys79Tyr;<br>p.Cys106Tyr<br>;<br>p.Cys199Tyr<br>;<br>p.Cys238Tyr | 74 | FALSE | chr17:757<br>7568:C:T       | 183:chr17:<br>7577568:C<br>:T   | 0.006115 |
| 83_c1bl-1 | 83 | NOTCH1             | MODERATE           | c.5777G>A                                                                   | p.Arg1926His                                                       | 0  | FALSE | chr9:1393<br>95161:C:T      | 183:chr9:1<br>39395161:<br>C:T  | 0.001365 |
| 83_c1bl-1 | 83 | RPL19              | MODERATE           | c.452G>A                                                                    | p.Arg151His                                                        | 0  | FALSE | chr17:373<br>60425:G:A      | 183:chr17:<br>37360425:<br>G:A  | 0.001574 |
| 83_c1bl-1 | 83 | HGF                | MODERATE           | c.1172G>A<br>;<br>c.1187G>A                                                 | p.Gly391Asp<br>;<br>p.Gly396Asp                                    | 0  | FALSE | chr7:8135<br>0145:C:T       | 183:chr7:8<br>1350145:C<br>:T   | 0.00095  |
| 83_c1bl-1 | 83 | MIR4673;<br>NOTCH1 | MODIFIER; MODERATE | n.*59A>C;<br>c.1195A>C                                                      | ; p.Thr399Pro                                                      | 0  | FALSE | chr9:1394<br>12649:T:G      | 183:chr9:1<br>39412649:<br>T:G  | 0.005013 |
| 83_c1bl-1 | 83 | PTEN               | MODERATE           | c.698G>A                                                                    | p.Arg233Gln                                                        | 2  | FALSE | chr10:897<br>17673:G:A      | 183:chr10:<br>89717673:<br>G:A  | 0.000968 |
| 83_c1bl-1 | 83 | PHLPP1             | MODERATE           | c.2197G>A                                                                   | p.Val733Ile                                                        | 0  | FALSE | chr18:605<br>62374:G:A      | 183:chr18:<br>60562374:<br>G:A  | 0.001067 |
| 83_c1bl-1 | 83 | CDH1               | MODERATE           | c.2218C>T                                                                   | p.Pro740Ser                                                        | 0  | FALSE | chr16:688<br>62130:C:T      | 183:chr16:<br>68862130:<br>C:T  | 0.000925 |
| 83_c1bl-1 | 83 | IGF1R              | MODERATE           | c.3905T>C;<br>c.3908T>C                                                     | p.Val1302Ala;<br>p.Val1303Ala                                      | 0  | FALSE | chr15:995<br>00475:T:C      | 183:chr15:<br>99500475:<br>T:C  | 0.006024 |
| 83_c1bl-1 | 83 | CDH1               | HIGH               | c.1792C>T                                                                   | p.Arg598*                                                          | 0  | FALSE | chr16:688<br>55984:C:T      | 183:chr16:<br>68855984:<br>C:T  | 0.00084  |
| 83_c1bl-1 | 83 | SMO                | MODERATE           | c.1045A>C                                                                   | p.Thr349Pro                                                        | 0  | FALSE | chr7:1288<br>46115:A:C      | 183:chr7:1<br>28846115:<br>A:C  | 0.009052 |

|           |    |                             |                            |                                                                                                                  |                                                                                                       |   |       |                    |                        |          |
|-----------|----|-----------------------------|----------------------------|------------------------------------------------------------------------------------------------------------------|-------------------------------------------------------------------------------------------------------|---|-------|--------------------|------------------------|----------|
| 83_c1bl-1 | 83 | ZNF716                      | HIGH                       | c.31C>T                                                                                                          | p.Arg11*                                                                                              | 0 | FALSE | chr7:57510025:C:T  | 183:chr7:57510025:C:T  | 0.001291 |
| 83_c1bl-1 | 83 | FGFR1                       | MODERATE                   | c.181G>A;<br>c.187G>A;<br>c.430G>A;<br>c.448G>A;<br>c.454G>A;<br>c.547G>A                                        | p.Ala61Thr;<br>p.Ala63Thr;<br>p.Ala144Thr<br>;<br>p.Ala150Thr<br>;<br>p.Ala152Thr<br>;<br>p.Ala183Thr | 1 | FALSE | chr8:38285606:C:T  | 183:chr8:38285606:C:T  | 0.00126  |
| 83_c1bl-1 | 83 | TP53                        | MODERATE                   | c.134A>G;<br>c.215A>G;<br>c.494A>G;<br>c.611A>G                                                                  | p.Glu45Gly;<br>p.Glu72Gly;<br>p.Glu165Gly<br>;<br>p.Glu204Gly                                         | 3 | FALSE | chr17:7578238:T:C  | 183:chr17:7578238:T:C  | 0.000994 |
| 83_c1bl-1 | 83 | MAP2K1                      | MODERATE                   | c.316G>A                                                                                                         | p.Ala106Thr                                                                                           | 1 | FALSE | chr15:66729108:G:A | 183:chr15:66729108:G:A | 0.001445 |
| 83_c1bl-1 | 83 | C9orf53;<br>CDKN2A          | MODIFIER; MODERATE;<br>LOW | n.*616T>G<br>;<br>c.*120A>C<br>;<br>c.197A>C;<br>c.240A>C                                                        | p.His66Pro;<br>p.Pro80Pro                                                                             | 1 | FALSE | chr9:21971161:T:G  | 183:chr9:21971161:T:G  | 0.035256 |
| 83_c1bl-1 | 83 | MIR4673;<br>NOTCH1          | MODIFIER; MODERATE         | n.*59G>A;<br>c.1024G>A                                                                                           | p.Ala342Thr                                                                                           | 0 | FALSE | chr9:139413118:C:T | 183:chr9:139413118:C:T | 0.002353 |
| 83_c1bl-1 | 83 | ERBB2;<br>MIEN1;<br>MIR4728 | MODIFIER; MODERATE         | c.3160-213A>G;<br>c.3251A>G<br>;<br>c.3296A>G<br>;<br>c.3341A>G<br>;<br>n.3665A>G<br>;<br>c.*388T>C;<br>n.*67A>G | p.Glu1084Gly;<br>p.Glu1099Gly;<br>p.Glu1114Gly                                                        | 1 | FALSE | chr17:37883729:A:G | 183:chr17:37883729:A:G | 0.003049 |
| 83_c1bl-1 | 83 | RET                         | MODERATE                   | c.1690A>C                                                                                                        | p.Thr564Pro                                                                                           | 1 | FALSE | chr10:43608342:A:C | 183:chr10:43608342:A:C | 0.007496 |
| 83_c1bl-1 | 83 | BRAF                        | MODERATE                   | c.436C>T                                                                                                         | p.Arg146Trp                                                                                           | 1 | FALSE | chr7:140534477:G:A | 183:chr7:140534477:G:A | 0.000898 |
| 83_c1bl-1 | 83 | PIK3CA                      | MODERATE                   | c.518C>A                                                                                                         | p.Ser173Tyr                                                                                           | 1 | FALSE | chr3:178917643:C:A | 183:chr3:178917643:C:A | 0.000884 |

|         |    |                             |                    |                                                                                                |                                                                         |   |       |                             |                                 |          |
|---------|----|-----------------------------|--------------------|------------------------------------------------------------------------------------------------|-------------------------------------------------------------------------|---|-------|-----------------------------|---------------------------------|----------|
| 94_c9-1 | 94 | MET                         | MODERATE           | c.487T>C                                                                                       | p.Ser163Pro                                                             | 1 | FALSE | chr7:1163<br>39625:T:C      | 184:chr7:1<br>16339625:<br>T:C  | 0.001748 |
| 94_c9-1 | 94 | C9orf53;<br>CDKN2A          | MODIFIER; MODERATE | n.*616C>G<br>;<br>c.*140G>C<br>;<br>c.217G>C;<br>c.260G>C                                      | p.Ala73Pro;<br>p.Arg87Pro                                               | 1 | FALSE | chr9:2197<br>1141:C:G       | 184:chr9:2<br>1971141:C<br>:G   | 0.009901 |
| 94_c9-1 | 94 | AKT1                        | MODERATE           | c.1112C>T                                                                                      | p.Thr371Met                                                             | 1 | FALSE | chr14:105<br>239275:G:<br>A | 184:chr14:<br>10523927<br>5:G:A | 0.002092 |
| 94_c9-1 | 94 | NOTCH1                      | MODERATE           | c.4906G>A                                                                                      | p.Glu1636Lys                                                            | 0 | FALSE | chr9:1393<br>99237:C:T      | 184:chr9:1<br>39399237:<br>C:T  | 0.002075 |
| 94_c9-1 | 94 | TSC2                        | MODERATE           | c.2702G>A                                                                                      | p.Arg901His                                                             | 0 | FALSE | chr16:212<br>6131:G:A       | 184:chr16:<br>2126131:G<br>:A   | 0.001783 |
| 94_c9-1 | 94 | TSC2                        | MODIFIER; MODERATE | c.2837+10<br>92G>A;<br>c.2917G>A                                                               | p.Glu973Lys                                                             | 0 | FALSE | chr16:212<br>7678:G:A       | 184:chr16:<br>2127678:G<br>:A   | 0.001978 |
| 94_c9-1 | 94 | MAP2K2                      | MODERATE           | c.281C>T                                                                                       | p.Ser94Leu                                                              | 0 | FALSE | chr19:411<br>7439:G:A       | 184:chr19:<br>4117439:G<br>:A   | 0.002699 |
| 94_c9-1 | 94 | ERBB2;<br>MIEN1;<br>MIR4728 | MODERATE; MODIFIER | c.2306A>C<br>;<br>c.2351A>C<br>;<br>c.2396A>C<br>;<br>n.2720A>C<br>;<br>c.*388T>G<br>; n.-1A>C | p.Gln769Pro<br>;<br>p.Gln784Pro<br>;<br>p.Gln799Pro<br>;                | 1 | FALSE | chr17:378<br>81067:A:C      | 184:chr17:<br>37881067:<br>A:C  | 0.002107 |
| 94_c9-1 | 94 | TP53                        | MODIFIER; MODERATE | c.*137A>G<br>;<br>c.*225A>G<br>;<br>c.1001A>G<br>;<br>c.1118A>G<br>;<br>c.641A>G;<br>c.722A>G  | p.Lys334Arg<br>;<br>p.Lys373Arg<br>;<br>p.Lys214Arg<br>;<br>p.Lys241Arg | 1 | FALSE | chr17:757<br>2991:T:C       | 184:chr17:<br>7572991:T<br>:C   | 0.003175 |
| 94_c9-1 | 94 | MET                         | MODERATE           | c.1336A>G                                                                                      | p.Ile446Val                                                             | 1 | FALSE | chr7:1163<br>71857:A:G      | 184:chr7:1<br>16371857:<br>A:G  | 0.003215 |
| 94_c9-1 | 94 | BRAF                        | MODERATE           | c.1061G>A                                                                                      | p.Arg354Gln                                                             | 3 | FALSE | chr7:1404<br>94187:C:T      | 184:chr7:1<br>40494187:<br>C:T  | 0.002002 |
| 94_c9-1 | 94 | ALK                         | MODERATE           | c.3455T>C                                                                                      | p.Leu1152Pro                                                            | 1 | FALSE | chr2:2944<br>5270:A:G       | 184:chr2:2<br>9445270:A<br>:G   | 0.005269 |

|         |    |                             |                    |                                                                                                                  |                                                               |   |       |                    |                        |          |
|---------|----|-----------------------------|--------------------|------------------------------------------------------------------------------------------------------------------|---------------------------------------------------------------|---|-------|--------------------|------------------------|----------|
| 94_c9-1 | 94 | ERBB2;<br>MIEN1;<br>MIR4728 | MODIFIER; MODERATE | c.3160-213A>G;<br>c.3251A>G<br>;<br>c.3296A>G<br>;<br>c.3341A>G<br>;<br>n.3665A>G<br>;<br>c.*388T>C;<br>n.*67A>G | p.Glu1084Gly;<br>p.Glu1099Gly;<br>p.Glu1114Gly                | 1 | FALSE | chr17:37883729:A:G | 184:chr17:37883729:A:G | 0.001777 |
| 94_c9-1 | 94 | IGF1R                       | MODERATE           | c.1940G>A                                                                                                        | p.Arg647His                                                   | 0 | FALSE | chr15:99459304:G:A | 184:chr15:99459304:G:A | 0.003774 |
| 94_c9-1 | 94 | CTNNB1                      | MODERATE           | c.1972G>T                                                                                                        | p.Val658Phe                                                   | 0 | FALSE | chr3:41278096:G:T  | 184:chr3:41278096:G:T  | 0.002045 |
| 94_c9-1 | 94 | CDKN2A                      | MODIFIER; MODERATE | c.194-3568A>C;<br>c.52A>C                                                                                        | ; p.Thr18Pro                                                  | 1 | FALSE | chr9:21974775:T:G  | 184:chr9:21974775:T:G  | 0.006764 |
| 94_c9-1 | 94 | TP53                        | MODERATE           | c.274A>T;<br>c.355A>T;<br>c.634A>T;<br>c.751A>T                                                                  | p.Ile92Phe;<br>p.Ile119Phe;<br>p.Ile212Phe;<br>p.Ile251Phe    | 8 | FALSE | chr17:7577530:T:A  | 184:chr17:7577530:T:A  | 0.001781 |
| 94_c9-1 | 94 | NTRK1                       | MODERATE           | c.804C>G;<br>c.894C>G                                                                                            | p.His268Gln<br>;<br>p.His298Gln                               | 1 | FALSE | chr1:156843468:C:G | 184:chr1:156843468:C:G | 0.001953 |
| 94_c9-1 | 94 | ERBB2;<br>MIEN1;<br>MIR4728 | MODIFIER; MODERATE | c.3160-319G>A;<br>c.3145G>A<br>;<br>c.3190G>A<br>;<br>c.3235G>A<br>;<br>n.3559G>A<br>;<br>c.*388C>T;<br>n.*67G>A | p.Glu1049Lys;<br>p.Glu1064Lys;<br>p.Glu1079Lys                | 1 | FALSE | chr17:37883623:G:A | 184:chr17:37883623:G:A | 0.001277 |
| 94_c9-1 | 94 | NTRK3                       | MODERATE           | c.1744G>A<br>;<br>c.1768G>A                                                                                      | p.Glu582Lys<br>;<br>p.Glu590Lys                               | 0 | FALSE | chr15:88476364:C:T | 184:chr15:88476364:C:T | 0.002262 |
| 94_c9-1 | 94 | MITF                        | MODERATE           | c.157A>C;<br>c.265A>C;<br>c.310A>C;<br>c.313A>C                                                                  | p.Thr53Pro;<br>p.Thr89Pro;<br>p.Thr104Pro<br>;<br>p.Thr105Pro | 0 | FALSE | chr3:69928493:A:C  | 184:chr3:69928493:A:C  | 0.002058 |

|          |     |                           |                            |                                                                                    |                                                  |    |       |                    |                        |          |
|----------|-----|---------------------------|----------------------------|------------------------------------------------------------------------------------|--------------------------------------------------|----|-------|--------------------|------------------------|----------|
| 94_c9-1  | 94  | IGF1R                     | MODERATE                   | c.3005G>A;<br>; c.3008G>A                                                          | p.Arg1002Gln;<br>p.Arg1003Gln                    | 0  | FALSE | chr15:99478104:G:A | 184:chr15:99478104:G:A | 0.001919 |
| 94_c9-1  | 94  | RET                       | MODERATE                   | c.1690A>C                                                                          | p.Thr564Pro                                      | 1  | FALSE | chr10:43608342:A:C | 184:chr10:43608342:A:C | 0.004032 |
| 94_c9-1  | 94  | TP53                      | MODIFIER; HIGH             | c.-55C>A;<br>c.27C>A;<br>c.306C>A;<br>c.423C>A                                     | ; p.Cys9*;<br>p.Cys102*;<br>p.Cys141*            | 13 | FALSE | chr17:7578507:G:T  | 184:chr17:7578507:G:T  | 0.239815 |
| 94_c9-1  | 94  | TP53                      | MODIFIER; MODERATE         | c.-11G>C;<br>c.350G>C;<br>c.467G>C;<br>c.71G>C                                     | ; p.Arg117Pro;<br>; p.Arg156Pro;<br>; p.Arg24Pro | 26 | FALSE | chr17:7578463:C:G  | 184:chr17:7578463:C:G  | 0.001885 |
| 132_bl-1 | 132 | IDH1                      | MODERATE                   | c.1077G>T                                                                          | p.Leu359Phe                                      | 1  | FALSE | chr2:209103872:C:A | 185:chr2:209103872:C:A | 0.000937 |
| 132_bl-1 | 132 | C9orf53;<br>CDKN2A        | MODIFIER; MODERATE;<br>LOW | n.*616T>G;<br>; c.*120A>C;<br>; c.197A>C;<br>c.240A>C                              | ; p.His66Pro;<br>p.Pro80Pro                      | 1  | FALSE | chr9:21971161:T:G  | 185:chr9:21971161:T:G  | 0.037383 |
| 132_bl-1 | 132 | MIR4673;<br>NOTCH1        | MODIFIER; HIGH             | n.*59C>T;<br>c.1828C>T                                                             | ; p.Gln610*                                      | 0  | FALSE | chr9:139410010:G:A | 185:chr9:139410010:G:A | 0.001385 |
| 132_bl-1 | 132 | MIR1225;<br>PKD1;<br>TSC2 | MODIFIER; MODERATE         | n.*90G>A;<br>c.*13118G>A;<br>c.*13121G>A;<br>c.5032C>T;<br>c.5164C>T;<br>c.5233C>T | ; p.Arg1678Cys;<br>p.Arg1722Cys;<br>p.Arg1745Cys | 0  | FALSE | chr16:2138300:C:T  | 185:chr16:2138300:C:T  | 0.001287 |
| 132_bl-1 | 132 | APC                       | HIGH                       | c.1606C>T;<br>c.1660C>T                                                            | p.Arg536*;<br>p.Arg554*                          | 0  | FALSE | chr5:112164586:C:T | 185:chr5:112164586:C:T | 0.001171 |
| 132_bl-1 | 132 | CWH43                     | MODERATE                   | c.1535G>A;<br>; c.1616G>A                                                          | p.Gly512Asp;<br>p.Gly539Asp                      | 0  | FALSE | chr4:49034690:G:A  | 185:chr4:49034690:G:A  | 0.00121  |



|          |     |                    |                    |                                                                           |                                                                                             |   |       |                             |                                 |          |
|----------|-----|--------------------|--------------------|---------------------------------------------------------------------------|---------------------------------------------------------------------------------------------|---|-------|-----------------------------|---------------------------------|----------|
| 132_bl-1 | 132 | FGFR1              | MODERATE           | c.359C>T;<br>c.365C>T;<br>c.608C>T;<br>c.626C>T;<br>c.632C>T;<br>c.725C>T | p.Ala120Val;<br>p.Ala122Val;<br>p.Ala203Val;<br>p.Ala209Val;<br>p.Ala211Val;<br>p.Ala242Val | 1 | FALSE | chr8:3828<br>3753:G:A       | 185:chr8:3<br>8283753:G<br>:A   | 0.001452 |
| 132_bl-1 | 132 | ATM                | MODERATE           | c.4466G>A                                                                 | p.Arg1489His                                                                                | 0 | FALSE | chr11:108<br>163375:G:<br>A | 185:chr11:<br>10816337<br>5:G:A | 0.000903 |
| 132_bl-1 | 132 | FGFR3              | MODERATE           | c.905G>A                                                                  | p.Gly302Asp                                                                                 | 1 | FALSE | chr4:1803<br>727:G:A        | 185:chr4:1<br>803727:G:<br>A    | 0.001621 |
| 132_bl-1 | 132 | RET                | MODERATE           | c.1826G>A                                                                 | p.Cys609Tyr                                                                                 | 1 | FALSE | chr10:436<br>09070:G:A      | 185:chr10:<br>43609070:<br>G:A  | 0.001326 |
| 132_bl-1 | 132 | NTRK1              | MODERATE           | c.1039C>T;<br>c.949C>T                                                    | p.Arg347Cys<br>;<br>p.Arg317Cys                                                             | 1 | FALSE | chr1:1568<br>43613:C:T      | 185:chr1:1<br>56843613:<br>C:T  | 0.001422 |
| 132_bl-1 | 132 | EPHA3              | MODERATE           | c.2408C>T                                                                 | p.Ser803Leu                                                                                 | 0 | FALSE | chr3:8949<br>8436:C:T       | 185:chr3:8<br>9498436:C<br>:T   | 0.001065 |
| 132_bl-1 | 132 | ALK                | MODERATE           | c.4411G>A                                                                 | p.Val1471Met                                                                                | 1 | FALSE | chr2:2941<br>6542:C:T       | 185:chr2:2<br>9416542:C<br>:T   | 0.000907 |
| 132_bl-1 | 132 | FGFR4              | MODERATE; LOW      | c.1186G>A<br>;<br>c.1306G>A<br>;<br>c.1152G>A                             | p.Val396Met<br>;<br>p.Val436Met<br>;<br>p.Ala384Ala                                         | 1 | FALSE | chr5:1765<br>20461:G:A      | 185:chr5:1<br>76520461:<br>G:A  | 0.001015 |
| 132_bl-1 | 132 | MIR4673;<br>NOTCH1 | MODIFIER; MODERATE | n.*59G>A;<br>c.1775G>A                                                    | p.Arg592His                                                                                 | 0 | FALSE | chr9:1394<br>10063:C:T      | 185:chr9:1<br>39410063:<br>C:T  | 0.001572 |
| 132_bl-1 | 132 | ALK                | MODERATE           | c.1307C>T                                                                 | p.Ala436Val                                                                                 | 1 | FALSE | chr2:2955<br>1323:G:A       | 185:chr2:2<br>9551323:G<br>:A   | 0.000982 |
| 132_bl-1 | 132 | TSC1               | MODERATE           | c.365C>T;<br>c.518C>T                                                     | p.Ala122Val;<br>p.Ala173Val                                                                 | 0 | FALSE | chr9:1357<br>97351:G:A      | 185:chr9:1<br>35797351:<br>G:A  | 0.00146  |
| 132_bl-1 | 132 | NF1                | MODIFIER; MODERATE | c.*2165G><br>A;<br>c.1976G>A                                              | p.Arg659Gln                                                                                 | 1 | FALSE | chr17:295<br>52243:G:A      | 185:chr17:<br>29552243:<br>G:A  | 0.00109  |

|          |     |        |                    |                                                                                                                                                                                     |                                                                         |   |       |                             |                                 |          |
|----------|-----|--------|--------------------|-------------------------------------------------------------------------------------------------------------------------------------------------------------------------------------|-------------------------------------------------------------------------|---|-------|-----------------------------|---------------------------------|----------|
| 132_bl-1 | 132 | FGFR2  | MODERATE; MODIFIER | c.1639C>T; ;<br>c.1642C>T; p.Arg575Trp<br>c.1645C>T; ;<br>c.1654C>T; p.Arg576Trp<br>c.1723C>T; ;<br>c.1726C>T; p.Arg664Trp<br>c.1990C>T; ;<br>c.1993C>T; p.Arg665Trp<br>n.2440C>T ; | p.Arg547Trp<br>;<br>p.Arg548Trp<br>;<br>p.Arg549Trp<br>;<br>p.Arg552Trp | 2 | FALSE | chr10:123<br>246935:G:<br>A | 185:chr10:<br>12324693<br>5:G:A | 0.003141 |
| 132_bl-1 | 132 | MITF   | MODERATE           | c.142G>A; p.Val48Ile;<br>c.250G>A; p.Val84Ile;<br>c.295G>A; p.Val99Ile;<br>c.298G>A p.Val100Ile                                                                                     |                                                                         | 0 | FALSE | chr3:6992<br>8478:G:A       | 185:chr3:6<br>9928478:G<br>:A   | 0.00117  |
| 132_bl-1 | 132 | AR     | MODERATE           | c.2324G>A<br>; c.728G>A                                                                                                                                                             | p.Arg775His<br>;<br>p.Arg243His                                         | 0 | FALSE | chrX:6694<br>1680:G:A       | 185:chrX:6<br>6941680:G<br>:A   | 0.001485 |
| 132_bl-1 | 132 | CDKN2A | MODIFIER; MODERATE | c.194-<br>3568A>C;<br>c.52A>C                                                                                                                                                       | ; p.Thr18Pro                                                            | 1 | FALSE | chr9:2197<br>4775:T:G       | 185:chr9:2<br>1974775:T<br>:G   | 0.008794 |
| 132_bl-1 | 132 | NTRK2  | MODERATE           | c.1628A>G<br>;<br>c.1676A>G                                                                                                                                                         | p.Glu543Gly<br>;<br>p.Glu559Gly                                         | 0 | FALSE | chr9:8754<br>9119:A:G       | 185:chr9:8<br>7549119:A<br>:G   | 0.001488 |
| 132_bl-1 | 132 | ATM    | HIGH               | c.3663G>A                                                                                                                                                                           | p.Trp1221*                                                              | 0 | FALSE | chr11:108<br>153523:G:<br>A | 185:chr11:<br>10815352<br>3:G:A | 0.001057 |
| 132_bl-1 | 132 | NOTCH1 | MODERATE           | c.5161G>A                                                                                                                                                                           | p.Val1721M<br>et                                                        | 0 | FALSE | chr9:1393<br>97640:C:T      | 185:chr9:1<br>39397640:<br>C:T  | 0.001754 |
| 132_bl-1 | 132 | AKT1   | MODERATE           | c.1339A>G                                                                                                                                                                           | p.Ile447Val                                                             | 1 | FALSE | chr14:105<br>237106:T:<br>C | 185:chr14:<br>10523710<br>6:T:C | 0.001393 |

|          |     |                    |                    |                                                                                                             |                                                                                             |    |       |                     |                         |          |
|----------|-----|--------------------|--------------------|-------------------------------------------------------------------------------------------------------------|---------------------------------------------------------------------------------------------|----|-------|---------------------|-------------------------|----------|
| 132_bl-1 | 132 | FGFR2              | MODIFIER; MODERATE | c.939+4720G>A;<br>c.1145G>A;<br>c.1148G>A;<br>c.800G>A;<br>c.809G>A;<br>c.878G>A;<br>c.881G>A;<br>n.1595G>A | p.Cys382Tyr;<br>p.Cys383Tyr;<br>p.Cys267Tyr;<br>p.Cys270Tyr;<br>p.Cys293Tyr;<br>p.Cys294Tyr | 2  | FALSE | chr10:123274773:C:T | 185:chr10:123274773:C:T | 0.00099  |
| 132_bl-1 | 132 | DDR2               | MODERATE           | c.313C>T                                                                                                    | p.Arg105Cys                                                                                 | 2  | FALSE | chr1:162724541:C:T  | 185:chr11:62724541:C:T  | 0.000935 |
| 132_bl-1 | 132 | HOXD-AS2;<br>HOXD8 | MODIFIER; MODERATE | n.*692C>T;<br>c.-123-30G>A;<br>c.400G>A                                                                     | p.Ala134Thr                                                                                 | 0  | FALSE | chr2:176995494:G:A  | 185:chr2:176995494:G:A  | 0.002636 |
| 132_bl-1 | 132 | TP53               | MODERATE           | c.100C>T;<br>c.181C>T;<br>c.460C>T;<br>c.577C>T                                                             | p.His34Tyr;<br>p.His61Tyr;<br>p.His154Tyr;<br>p.His193Tyr                                   | 46 | FALSE | chr17:7578272:G:A   | 185:chr17:7578272:G:A   | 0.001186 |
| 132_bl-1 | 132 | FGFR3              | MODERATE           | c.1526G>A;<br>c.1862G>A;<br>c.1868G>A                                                                       | p.Arg509His;<br>p.Arg621His;<br>p.Arg623His                                                 | 2  | FALSE | chr4:1807803:G:A    | 185:chr4:1807803:G:A    | 0.001657 |
| 132_bl-1 | 132 | MIR4673;<br>NOTCH1 | MODIFIER; HIGH     | n.-1G>T;<br>c.574G>T                                                                                        | p.Gly192*                                                                                   | 0  | FALSE | chr9:139417470:C:A  | 185:chr9:139417470:C:A  | 0.001767 |
| 132_bl-1 | 132 | IGF1R              | MODERATE           | c.3934T>C;<br>c.3937T>C                                                                                     | p.Ser1312Pro;<br>p.Ser1313Pro                                                               | 0  | FALSE | chr15:99500504:T:C  | 185:chr15:99500504:T:C  | 0.005663 |
| 132_bl-1 | 132 | EGFR;<br>EGFR-AS1  | MODERATE; MODIFIER | c.2387G>A;<br>n.1175C>T                                                                                     | p.Gly796Asp                                                                                 | 3  | FALSE | chr7:55249089:G:A   | 185:chr7:55249089:G:A   | 0.001494 |
| 132_bl-1 | 132 | CDH1               | MODERATE           | c.2074G>A                                                                                                   | p.Ala692Thr                                                                                 | 0  | FALSE | chr16:68857439:G:A  | 185:chr16:68857439:G:A  | 0.001115 |
| 132_bl-1 | 132 | TP53               | MODERATE           | c.422C>T;<br>c.503C>T;<br>c.782C>T;<br>c.899C>T                                                             | p.Pro141Leu;<br>p.Pro168Leu;<br>p.Pro261Leu;<br>p.Pro300Leu                                 | 6  | FALSE | chr17:7577039:G:A   | 185:chr17:7577039:G:A   | 0.001228 |

|          |     |                             |                    |                                                                                               |                                                          |       |       |                             |                                 |          |
|----------|-----|-----------------------------|--------------------|-----------------------------------------------------------------------------------------------|----------------------------------------------------------|-------|-------|-----------------------------|---------------------------------|----------|
| 132_bl-1 | 132 | ATM                         | HIGH               | c.7324C>T                                                                                     | p.Gln2442*                                               | 0     | FALSE | chr11:108<br>200957:C:<br>T | 185:chr11:<br>10820095<br>7:C:T | 0.000998 |
| 132_bl-1 | 132 | FGFR4                       | MODIFIER; MODERATE | c.1098-<br>65G>A;<br>c.1251+10<br>G>A;<br>c.1067G>A                                           | ; p.Arg356His                                            | 1     | FALSE | chr5:1765<br>20342:G:A      | 185:chr5:1<br>76520342:<br>G:A  | 0.002404 |
| 132_bl-1 | 132 | PTEN                        | MODERATE           | c.851A>G                                                                                      | p.Glu284Gly                                              | 7     | FALSE | chr10:897<br>20700:A:G      | 185:chr10:<br>89720700:<br>A:G  | 0.001306 |
| 132_bl-1 | 132 | RET                         | MODERATE           | c.1901G>A                                                                                     | p.Cys634Tyr                                              | 7     | FALSE | chr10:436<br>09949:G:A      | 185:chr10:<br>43609949:<br>G:A  | 0.000905 |
| 132_bl-1 | 132 | KDR                         | MODERATE           | c.3062C>T                                                                                     | p.Ser1021Le<br>u                                         | 1     | FALSE | chr4:5595<br>8791:G:A       | 185:chr4:5<br>5958791:G<br>:A   | 0.001074 |
| 132_bl-1 | 132 | KIT                         | MODERATE           | c.1493G>A                                                                                     | p.Gly498Asp                                              | 1     | FALSE | chr4:5559<br>2169:G:A       | 185:chr4:5<br>5592169:G<br>:A   | 0.001349 |
| 132_bl-1 | 132 | ERBB2;<br>MIEN1;<br>MIR4728 | MODERATE; MODIFIER | c.2261G>A<br>;<br>c.2306G>A<br>;<br>c.2351G>A<br>;<br>n.2675G>A<br>;<br>c.*388C>T;<br>n.-1G>A | p.Arg754His<br>;<br>p.Arg769His<br>;<br>p.Arg784His<br>; | 1     | FALSE | chr17:378<br>81022:G:A      | 185:chr17:<br>37881022:<br>G:A  | 0.000981 |
| 132_bl-1 | 132 | ALK                         | MODERATE           | c.3626G>A                                                                                     | p.Arg1209Gl<br>n                                         | 2     | FALSE | chr2:2944<br>3591:C:T       | 185:chr2:2<br>9443591:C<br>:T   | 0.002471 |
| 132_bl-1 | 132 | BRAF                        | MODERATE           | c.1799T>A                                                                                     | p.Val600Glu                                              | 23024 | FALSE | chr7:1404<br>53136:A:T      | 185:chr7:1<br>40453136:<br>A:T  | 0.268267 |
| 132_bl-1 | 132 | ALK                         | MODERATE           | c.2577G>T                                                                                     | p.Glu859As<br>p                                          | 1     | FALSE | chr2:2945<br>5225:C:A       | 185:chr2:2<br>9455225:C<br>:A   | 0.00106  |
| 132_bl-1 | 132 | IGF1R                       | MODERATE           | c.3613G>A<br>;<br>c.3616G>A                                                                   | p.Ala1205Th<br>r;<br>p.Ala1206Th<br>r                    | 0     | FALSE | chr15:994<br>91831:G:A      | 185:chr15:<br>99491831:<br>G:A  | 0.001168 |
| 132_bl-1 | 132 | NTRK1                       | MODERATE           | c.804C>G;<br>c.894C>G                                                                         | p.His268Gln<br>;<br>p.His298Gln                          | 1     | FALSE | chr1:1568<br>43468:C:G      | 185:chr1:1<br>56843468:<br>C:G  | 0.001883 |
| 132_bl-1 | 132 | C9orf53;<br>CDKN2A          | MODIFIER; MODERATE | n.*616C>G<br>;<br>c.*140G>C<br>;<br>c.217G>C;<br>c.260G>C                                     | ; p.Ala73Pro;<br>p.Arg87Pro                              | 1     | FALSE | chr9:2197<br>1141:C:G       | 185:chr9:2<br>1971141:C<br>:G   | 0.008639 |
| 132_bl-1 | 132 | ALK                         | MODERATE           | c.2623G>A                                                                                     | p.Gly875Arg                                              | 1     | FALSE | chr2:2945<br>5179:C:T       | 185:chr2:2<br>9455179:C<br>:T   | 0.001875 |

|          |     |        |                    |                                                                              |                                                             |   |       |                    |                        |          |
|----------|-----|--------|--------------------|------------------------------------------------------------------------------|-------------------------------------------------------------|---|-------|--------------------|------------------------|----------|
| 132_bl-1 | 132 | ATM    | MODERATE           | c.8122G>A                                                                    | p.Asp2708Asn                                                | 0 | FALSE | chr11:108205807:GA | 185:chr11:108205807:GA | 0.000987 |
| 132_bl-1 | 132 | NTRK2  | MODERATE           | c.220G>A                                                                     | p.Ala74Thr                                                  | 0 | FALSE | chr9:87317081:GA   | 185:chr9:87317081:GA   | 0.00143  |
| 132_bl-1 | 132 | MAP2K1 | MODERATE           | c.395C>T                                                                     | p.Ala132Val                                                 | 1 | FALSE | chr15:66729187:CT  | 185:chr15:66729187:CT  | 0.001563 |
| 132_bl-1 | 132 | TSC1   | MODERATE           | c.2272G>A;<br>c.2422G>A;<br>c.2425G>A                                        | p.Glu758Lys;<br>p.Glu808Lys;<br>p.Glu809Lys                 | 0 | FALSE | chr9:135777053:CT  | 185:chr9:135777053:CT  | 0.001411 |
| 132_bl-1 | 132 | MAP2K1 | MODERATE           | c.146G>A                                                                     | p.Arg49His                                                  | 1 | FALSE | chr15:66727430:GA  | 185:chr15:66727430:GA  | 0.001232 |
| 132_bl-1 | 132 | PIK3CA | MODERATE           | c.56G>A                                                                      | p.Arg19Lys                                                  | 1 | FALSE | chr3:178916669:GA  | 185:chr3:178916669:GA  | 0.000904 |
| 132_bl-1 | 132 | MET    | MODERATE           | c.487T>C                                                                     | p.Ser163Pro                                                 | 1 | FALSE | chr7:116339625:TC  | 185:chr7:116339625:TC  | 0.002065 |
| 132_bl-1 | 132 | TSC2   | MODERATE           | c.1610G>A                                                                    | p.Arg537His                                                 | 0 | FALSE | chr16:2115530:GA   | 185:chr16:2115530:GA   | 0.001059 |
| 132_bl-1 | 132 | EPHA3  | MODERATE           | c.1142G>A                                                                    | p.Arg381His                                                 | 0 | FALSE | chr3:89391076:GA   | 185:chr3:89391076:GA   | 0.000992 |
| 132_bl-1 | 132 | IGF1R  | MODERATE           | c.3905T>C;<br>c.3908T>C                                                      | p.Val1302Ala;<br>p.Val1303Ala                               | 0 | FALSE | chr15:99500475:TC  | 185:chr15:99500475:TC  | 0.008526 |
| 132_bl-1 | 132 | CTNNB1 | MODERATE           | c.559G>A                                                                     | p.Ala187Thr                                                 | 0 | FALSE | chr3:41266888:GA   | 185:chr3:41266888:GA   | 0.001252 |
| 132_bl-1 | 132 | MET    | MODERATE           | c.470A>G                                                                     | p.Glu157Gly                                                 | 1 | FALSE | chr7:116339608:AG  | 185:chr7:116339608:AG  | 0.001232 |
| 132_bl-1 | 132 | TP53   | MODIFIER; MODERATE | c.*109G>A;<br>c.*197G>A;<br>c.1090G>A;<br>c.613G>A;<br>c.694G>A;<br>c.973G>A | p.Ala364Thr;<br>p.Ala205Thr;<br>p.Ala232Thr;<br>p.Ala325Thr | 1 | FALSE | chr17:7573937:CT   | 185:chr17:7573937:CT   | 0.001178 |
| 132_bl-1 | 132 | HGF    | MODERATE           | c.401G>A                                                                     | p.Arg134His                                                 | 0 | FALSE | chr7:81386586:CT   | 185:chr7:81386586:CT   | 0.000966 |
| 132_bl-1 | 132 | STK11  | MODERATE           | c.455A>G                                                                     | p.Gln152Arg                                                 | 3 | FALSE | chr19:1219403:AG   | 185:chr19:1219403:AG   | 0.002611 |

|          |     |                             |                    |                                                                                                                  |                                                                         |   |       |                    |                        |          |
|----------|-----|-----------------------------|--------------------|------------------------------------------------------------------------------------------------------------------|-------------------------------------------------------------------------|---|-------|--------------------|------------------------|----------|
| 132_bl-1 | 132 | ERBB2;<br>MIEN1;<br>MIR4728 | MODIFIER; MODERATE | c.3160-213A>G;<br>c.3251A>G<br>;<br>c.3296A>G<br>;<br>c.3341A>G<br>;<br>n.3665A>G<br>;<br>c.*388T>C;<br>n.*67A>G | p.Glu1084Gly;<br>p.Glu1099Gly;<br>p.Glu1114Gly                          | 1 | FALSE | chr17:37883729:A:G | 185:chr17:37883729:A:G | 0.002448 |
| 132_bl-1 | 132 | FGFR4                       | HIGH               | c.1041G>A                                                                                                        | p.Trp347*                                                               | 1 | FALSE | chr5:176519769:G:A | 185:chr5:176519769:G:A | 0.001262 |
| 132_bl-1 | 132 | CDH1                        | MODERATE           | c.263C>A                                                                                                         | p.Pro88His                                                              | 0 | FALSE | chr16:68835672:C:A | 185:chr16:68835672:C:A | 0.00117  |
| 132_bl-1 | 132 | TP53                        | MODERATE           | c.284T>C;<br>c.365T>C;<br>c.644T>C;<br>c.761T>C                                                                  | p.Ile95Thr;<br>p.Ile122Thr;<br>p.Ile215Thr;<br>p.Ile254Thr              | 9 | FALSE | chr17:7577520:A:G  | 185:chr17:7577520:A:G  | 0.001923 |
| 132_bl-1 | 132 | VHL                         | MODIFIER; MODERATE | c.341-3270A>C;<br>c.344A>C                                                                                       | p.His115Pro                                                             | 0 | FALSE | chr3:10188201:A:C  | 185:chr3:10188201:A:C  | 0.002076 |
| 132_bl-1 | 132 | NTRK1                       | MODERATE           | c.239C>T;<br>c.329C>T                                                                                            | p.Ala80Val;<br>p.Ala110Val                                              | 1 | FALSE | chr1:156834561:C:T | 185:chr1:156834561:C:T | 0.001815 |
| 132_bl-1 | 132 | TSC2                        | MODERATE           | c.1654G>A                                                                                                        | p.Ala552Thr                                                             | 0 | FALSE | chr16:2115574:G:A  | 185:chr16:2115574:G:A  | 0.003513 |
| 132_bl-1 | 132 | TP53                        | MODIFIER; MODERATE | c.*111G>T<br>;<br>c.*23G>T;<br>c.1004G>T<br>;<br>c.527G>T;<br>c.608G>T;<br>c.887G>T                              | p.Arg335Leu<br>;<br>p.Arg176Leu<br>;<br>p.Arg203Leu<br>;<br>p.Arg296Leu | 2 | FALSE | chr17:7574023:C:A  | 185:chr17:7574023:C:A  | 0.001168 |
| 132_bl-1 | 132 | EGFR                        | MODIFIER; MODERATE | c.*2133G>A;<br>c.*2364G>A;<br>c.2030G>A                                                                          | p.Arg677His                                                             | 5 | FALSE | chr7:55240786:G:A  | 185:chr7:55240786:G:A  | 0.002504 |

|          |     |                 |                    |                                                                                                                                                                                |                                                                                                                      |    |       |                             |                                 |          |
|----------|-----|-----------------|--------------------|--------------------------------------------------------------------------------------------------------------------------------------------------------------------------------|----------------------------------------------------------------------------------------------------------------------|----|-------|-----------------------------|---------------------------------|----------|
| 132_bl-1 | 132 | NTRK1           | MODERATE           | c.1940T>G;<br>c.2030T>G;<br>c.2048T>G                                                                                                                                          | p.Val647Gly;<br>p.Val677Gly;<br>p.Val683Gly                                                                          | 2  | FALSE | chr1:1568<br>49792:T:G      | 185:chr1:1<br>56849792:<br>T:G  | 0.006205 |
| 132_bl-1 | 132 | ATM             | HIGH               | c.5623C>T                                                                                                                                                                      | p.Arg1875*                                                                                                           | 0  | FALSE | chr11:108<br>175528:C:<br>T | 185:chr11:<br>10817552<br>8:C:T | 0.002701 |
| 132_bl-1 | 132 | CDH1            | MODERATE           | c.2053G>A                                                                                                                                                                      | p.Val685Met                                                                                                          | 0  | FALSE | chr16:688<br>57418:G:A      | 185:chr16:<br>68857418:<br>G:A  | 0.001124 |
| 132_bl-1 | 132 | EPHA3           | MODERATE           | c.1543G>A                                                                                                                                                                      | p.Ala515Thr                                                                                                          | 0  | FALSE | chr3:8944<br>8579:G:A       | 185:chr3:8<br>9448579:G<br>:A   | 0.001182 |
| 132_bl-1 | 132 | NF1             | MODERATE           | c.2695T>G                                                                                                                                                                      | p.Leu899Val                                                                                                          | 3  | FALSE | chr17:295<br>56328:T:G      | 185:chr17:<br>29556328:<br>T:G  | 0.000984 |
| 132_bl-1 | 132 | NF1             | MODERATE           | c.7381G>A;<br>c.7444G>A                                                                                                                                                        | p.Asp2461Asn;<br>p.Asp2482Asn                                                                                        | 1  | FALSE | chr17:296<br>77323:G:A      | 185:chr17:<br>29677323:<br>G:A  | 0.00196  |
| 132_bl-1 | 132 | NTRK3           | MODERATE           | c.346C>T                                                                                                                                                                       | p.Arg116Trp                                                                                                          | 0  | FALSE | chr15:887<br>26698:G:A      | 185:chr15:<br>88726698:<br>G:A  | 0.002797 |
| 132_bl-1 | 132 | NF1             | MODERATE           | c.647T>C                                                                                                                                                                       | p.Leu216Pro                                                                                                          | 1  | FALSE | chr17:295<br>08500:T:C      | 185:chr17:<br>29508500:<br>T:C  | 0.001361 |
| 132_bl-1 | 132 | RET             | MODERATE           | c.1339G>A                                                                                                                                                                      | p.Ala447Thr                                                                                                          | 1  | FALSE | chr10:436<br>06730:G:A      | 185:chr10:<br>43606730:<br>G:A  | 0.000932 |
| 132_bl-1 | 132 | EGFR            | MODERATE           | c.866C>T                                                                                                                                                                       | p.Ala289Val                                                                                                          | 34 | FALSE | chr7:5522<br>1822:C:T       | 185:chr7:5<br>5221822:C<br>:T   | 0.001205 |
| 132_bl-1 | 132 | KIT             | MODERATE           | c.1835C>T;<br>c.1847C>T                                                                                                                                                        | p.Ala612Val;<br>p.Ala616Val                                                                                          | 1  | FALSE | chr4:5559<br>4061:C:T       | 185:chr4:5<br>5594061:C<br>:T   | 0.001009 |
| 132_bl-1 | 132 | FGFR1;<br>LETM2 | MODERATE; MODIFIER | c.1927C>T;<br>c.1933C>T;<br>c.2170C>T;<br>c.2194C>T;<br>c.2200C>T;<br>c.2293C>T;<br>c.*1406G><br>A;<br>c.*1423G><br>A;<br>c.*1553G><br>A;<br>c.*1567G><br>A;<br>c.*1638G><br>A | p.Arg643Trp<br>;<br>p.Arg645Trp<br>;<br>p.Arg724Trp<br>;<br>p.Arg732Trp<br>;<br>p.Arg734Trp<br>;<br>p.Arg765Trp<br>; | 1  | FALSE | chr8:3827<br>1528:G:A       | 185:chr8:3<br>8271528:G<br>:A   | 0.001938 |

|          |     |                 |                    |                                                                                                    |                                             |      |       |                     |                         |          |
|----------|-----|-----------------|--------------------|----------------------------------------------------------------------------------------------------|---------------------------------------------|------|-------|---------------------|-------------------------|----------|
| 132_bl-1 | 132 | TSC2            | MODERATE           | c.1381G>A                                                                                          | p.Val461Met                                 | 0    | FALSE | chr16:2112992:G:A   | 185:chr16:2112992:G:A   | 0.001536 |
| 132_bl-1 | 132 | CSDE1;<br>NRAS  | MODIFIER; MODERATE | c.*2430A>G;<br>c.*2523A>G;<br>c.*2817A>G;<br>c.*2910A>G;<br>c.*2964A>G;<br>c.*3057A>G;<br>c.182A>G | ; p.Gln61Arg                                | 1103 | FALSE | chr1:115256529:T:C  | 185:chr1:15256529:T:C   | 0.006901 |
| 132_bl-1 | 132 | CDH1            | MODERATE           | c.1252G>A                                                                                          | p.Asp418Asn                                 | 0    | FALSE | chr16:68847330:G:A  | 185:chr16:68847330:G:A  | 0.001143 |
| 132_bl-1 | 132 | RET             | MODERATE           | c.1690A>C                                                                                          | p.Thr564Pro                                 | 1    | FALSE | chr10:43608342:A:C  | 185:chr10:43608342:A:C  | 0.004828 |
| 132_bl-1 | 132 | INSRR;<br>NTRK1 | MODIFIER; MODERATE | c.3397+28C>T;<br>c.13G>A                                                                           | ; p.Ala5Thr                                 | 3    | FALSE | chr1:156811876:G:A  | 185:chr1:156811876:G:A  | 0.000987 |
| 132_bl-1 | 132 | TSC2            | MODIFIER; MODERATE | c.2837+1108G>A;<br>c.2933G>A                                                                       | ; p.Arg978His                               | 0    | FALSE | chr16:2127694:G:A   | 185:chr16:2127694:G:A   | 0.003023 |
| 132_bl-1 | 132 | FBXW7           | MODERATE           | c.1160G>A;<br>c.1274G>A;<br>c.1514G>A                                                              | p.Arg387His;<br>p.Arg425His;<br>p.Arg505His | 0    | FALSE | chr4:153247288:C:T  | 185:chr4:153247288:C:T  | 0.00108  |
| 132_bl-1 | 132 | ATM             | MODERATE           | c.5873C>T                                                                                          | p.Ala1958Val                                | 0    | FALSE | chr11:108180997:C:T | 185:chr11:108180997:C:T | 0.000991 |
| 132_bl-1 | 132 | KDR             | MODERATE           | c.2068G>A                                                                                          | p.Ala690Thr                                 | 1    | FALSE | chr4:55968595:C:T   | 185:chr4:55968595:C:T   | 0.00135  |
| 132_bl-1 | 132 | APC             | HIGH               | c.1042C>T;<br>c.988C>T                                                                             | p.Arg348*;<br>p.Arg330*                     | 0    | FALSE | chr5:112154771:C:T  | 185:chr5:112154771:C:T  | 0.000977 |
| 132_bl-1 | 132 | PIK3CA          | MODERATE           | c.2078G>A                                                                                          | p.Arg693His                                 | 1    | FALSE | chr3:178938836:G:A  | 185:chr3:178938836:G:A  | 0.001163 |
| 132_bl-1 | 132 | SMO             | MODERATE           | c.1045A>C                                                                                          | p.Thr349Pro                                 | 0    | FALSE | chr7:128846115:A:C  | 185:chr7:128846115:A:C  | 0.004995 |
| 132_bl-1 | 132 | EGFR            | MODERATE           | c.445C>T                                                                                           | p.Arg149Trp                                 | 1    | FALSE | chr7:55214319:C:T   | 185:chr7:55214319:C:T   | 0.001268 |
| 132_bl-1 | 132 | KDR             | MODERATE           | c.1028C>T                                                                                          | p.Thr343Met                                 | 3    | FALSE | chr4:55976884:G:A   | 185:chr4:55976884:G:A   | 0.000902 |



|          |     |                           |                    |                                                                                           |                                                                                                                                     |   |       |                             |                                 |          |
|----------|-----|---------------------------|--------------------|-------------------------------------------------------------------------------------------|-------------------------------------------------------------------------------------------------------------------------------------|---|-------|-----------------------------|---------------------------------|----------|
| 132_bl-1 | 132 | C9orf53;<br>CDKN2A        | MODIFIER; MODERATE | n.*616A>G<br>;<br>c.*312T>C;<br>c.*33T>C;<br>c.389T>C                                     | p.Leu130Pro                                                                                                                         | 5 | FALSE | chr9:2197<br>0969:A:G       | 185:chr9:2<br>1970969:A<br>:G   | 0.003382 |
| 132_bl-1 | 132 | MITF                      | MODERATE           | c.157A>C;<br>c.265A>C;<br>c.310A>C;<br>c.313A>C                                           | p.Thr53Pro;<br>p.Thr89Pro;<br>p.Thr104Pro<br>;<br>p.Thr105Pro                                                                       | 0 | FALSE | chr3:6992<br>8493:A:C       | 185:chr3:6<br>9928493:A<br>:C   | 0.001144 |
| 132_bl-1 | 132 | AR                        | MODERATE           | c.2360G>A<br>;<br>c.764G>A                                                                | p.Arg787Gln<br>;<br>p.Arg255Gln                                                                                                     | 0 | FALSE | chrX:6694<br>1716:G:A       | 185:chrX:6<br>6941716:G<br>:A   | 0.001217 |
| 111_c5-1 | 111 | FGFR2                     | MODIFIER; MODERATE | c.749-<br>4752G>A;<br>c.502G>A;<br>c.580G>A;<br>c.847G>A;<br>n.1149G>A                    | p.Asp168As<br>n;<br>p.Asp194As<br>n;<br>p.Asp283As<br>n                                                                             | 1 | FALSE | chr10:123<br>279585:C:<br>T | 186:chr10:<br>12327958<br>5:C:T | 0.002841 |
| 111_c5-1 | 111 | IGF1R                     | MODERATE           | c.3905T>C;<br>c.3908T>C                                                                   | p.Val1302Al<br>a;<br>p.Val1303Al<br>a                                                                                               | 0 | FALSE | chr15:995<br>00475:T:C      | 186:chr15:<br>99500475:<br>T:C  | 0.002981 |
| 111_c5-1 | 111 | NTRK1                     | MODERATE           | c.1751G>A<br>;<br>c.1841G>A<br>;<br>c.1859G>A                                             | p.Gly584Asp<br>;<br>p.Gly614Asp<br>;<br>p.Gly620Asp                                                                                 | 1 | FALSE | chr1:1568<br>48967:G:A      | 186:chr1:1<br>56848967:<br>G:A  | 0.002907 |
| 111_c5-1 | 111 | MITF                      | MODERATE           | c.1004C>T;<br>c.1049C>T;<br>c.1052C>T;<br>c.563C>T;<br>c.731C>T;<br>c.749C>T;<br>c.896C>T | p.Ser335Phe<br>;<br>p.Ser350Phe<br>;<br>p.Ser351Phe<br>;<br>p.Ser188Phe<br>;<br>p.Ser244Phe<br>;<br>p.Ser250Phe<br>;<br>p.Ser299Phe | 0 | FALSE | chr3:7000<br>8462:C:T       | 186:chr3:7<br>0008462:C<br>:T   | 0.003017 |
| 111_c5-1 | 111 | CDKN2A;<br>CDKN2B-<br>AS1 | MODERATE; MODIFIER | c.22A>G;<br>n.-1T>C                                                                       | p.Thr8Ala;                                                                                                                          | 1 | FALSE | chr9:2199<br>4309:T:C       | 186:chr9:2<br>1994309:T<br>:C   | 0.005682 |

|          |     |                             |                    |                                                                                                |                                                                    |     |       |                        |                                |          |
|----------|-----|-----------------------------|--------------------|------------------------------------------------------------------------------------------------|--------------------------------------------------------------------|-----|-------|------------------------|--------------------------------|----------|
| 111_c5-1 | 111 | TP53                        | MODERATE           | c.266G>A;<br>c.347G>A;<br>c.626G>A;<br>c.743G>A                                                | p.Arg89Gln;<br>p.Arg116Gln<br>;<br>p.Arg209Gln<br>;<br>p.Arg248Gln | 673 | FALSE | chr17:757<br>7538:C:T  | 186:chr17:<br>7577538:C<br>:T  | 0.002736 |
| 111_c5-1 | 111 | NTRK1                       | MODERATE           | c.1940T>G<br>;<br>c.2030T>G<br>;<br>c.2048T>G                                                  | p.Val647Gly;<br>p.Val677Gly;<br>p.Val683Gly                        | 2   | FALSE | chr1:1568<br>49792:T:G | 186:chr1:1<br>56849792:<br>T:G | 0.00431  |
| 111_c5-1 | 111 | TSC2                        | MODIFIER; MODERATE | c.2837+10<br>92G>A;<br>c.2917G>A                                                               | p.Glu973Lys                                                        | 0   | FALSE | chr16:212<br>7678:G:A  | 186:chr16:<br>2127678:G<br>:A  | 0.0032   |
| 111_c5-1 | 111 | VHL                         | MODIFIER; MODERATE | c.341-<br>3270A>C;<br>c.344A>C                                                                 | p.His115Pro                                                        | 0   | FALSE | chr3:1018<br>8201:A:C  | 186:chr3:1<br>0188201:A<br>:C  | 0.003846 |
| 82_c5-1  | 82  | NOTCH1                      | MODERATE           | c.4733T>G                                                                                      | p.Val1578Gly                                                       | 0   | FALSE | chr9:1393<br>99410:A:C | 188:chr9:1<br>39399410:<br>A:C | 0.001691 |
| 82_c5-1  | 82  | NF1                         | MODERATE           | c.3407G>A                                                                                      | p.Arg1136Gln                                                       | 2   | FALSE | chr17:295<br>59810:G:A | 188:chr17:<br>29559810:<br>G:A | 0.001049 |
| 82_c5-1  | 82  | ESR1                        | MODERATE           | c.1297C>T;<br>c.1300C>T;<br>c.1306C>T                                                          | p.Arg433Trp<br>;<br>p.Arg434Trp<br>;<br>p.Arg436Trp                | 0   | FALSE | chr6:1523<br>82190:C:T | 188:chr6:1<br>52382190:<br>C:T | 0.001133 |
| 82_c5-1  | 82  | NOTCH1                      | MODERATE           | c.5885G>A                                                                                      | p.Arg1962His                                                       | 0   | FALSE | chr9:1393<br>95053:C:T | 188:chr9:1<br>39395053:<br>C:T | 0.001452 |
| 82_c5-1  | 82  | ERBB2;<br>MIEN1;<br>MIR4728 | MODERATE; MODIFIER | c.3025G>A<br>;<br>c.3070G>A<br>;<br>c.3115G>A<br>;<br>n.3439G>A<br>;<br>c.*388C>T;<br>n.*67G>A | p.Ala1009Thr;<br>p.Ala1024Thr;<br>p.Ala1039Thr;                    | 2   | FALSE | chr17:378<br>83212:G:A | 188:chr17:<br>37883212:<br>G:A | 0.002172 |
| 82_c5-1  | 82  | TSC1                        | MODERATE           | c.1547C>T;<br>c.1697C>T;<br>c.1700C>T                                                          | p.Ala516Val;<br>p.Ala566Val;<br>p.Ala567Val                        | 0   | FALSE | chr9:1357<br>81265:G:A | 188:chr9:1<br>35781265:<br>G:A | 0.000862 |
| 82_c5-1  | 82  | CDH1                        | MODERATE           | c.1423G>A                                                                                      | p.Val475Met                                                        | 0   | FALSE | chr16:688<br>49520:G:A | 188:chr16:<br>68849520:<br>G:A | 0.000969 |

|         |    |                   |                    |                                                 |                                                             |     |       |                    |                        |          |
|---------|----|-------------------|--------------------|-------------------------------------------------|-------------------------------------------------------------|-----|-------|--------------------|------------------------|----------|
| 82_c5-1 | 82 | FLT3              | MODERATE           | c.1192G>A                                       | p.Asp398Asn                                                 | 0   | FALSE | chr13:28622425:C:T | 188:chr13:28622425:C:T | 0.001252 |
| 82_c5-1 | 82 | CDH1              | MODERATE           | c.221G>A                                        | p.Arg74Gln                                                  | 0   | FALSE | chr16:68835630:G:A | 188:chr16:68835630:G:A | 0.001041 |
| 82_c5-1 | 82 | FGFR3             | MODERATE           | c.1526G>A;<br>c.1862G>A;<br>c.1868G>A           | p.Arg509His;<br>p.Arg621His;<br>p.Arg623His                 | 2   | FALSE | chr4:1807803:G:A   | 188:chr4:1807803:G:A   | 0.001438 |
| 82_c5-1 | 82 | EGFR;<br>EGFR-AS1 | MODERATE; MODIFIER | c.2305G>A;<br>n.1257C>T                         | p.Val769Met                                                 | 3   | FALSE | chr7:55249007:G:A  | 188:chr7:55249007:G:A  | 0.000997 |
| 82_c5-1 | 82 | ALK               | MODERATE           | c.446C>T                                        | p.Ala149Val                                                 | 1   | FALSE | chr2:30143080:G:A  | 188:chr2:30143080:G:A  | 0.001497 |
| 82_c5-1 | 82 | SMO               | MODERATE           | c.1045A>C                                       | p.Thr349Pro                                                 | 0   | FALSE | chr7:128846115:A:C | 188:chr7:128846115:A:C | 0.006229 |
| 82_c5-1 | 82 | PDGFRA            | MODERATE           | c.2266G>A                                       | p.Asp756Asn                                                 | 1   | FALSE | chr4:55146592:G:A  | 188:chr4:55146592:G:A  | 0.000982 |
| 82_c5-1 | 82 | FLT3              | MODERATE           | c.2678C>T                                       | p.Pro893Leu                                                 | 0   | FALSE | chr13:28589369:G:A | 188:chr13:28589369:G:A | 0.001198 |
| 82_c5-1 | 82 | HGF               | MODERATE           | c.1255C>T;<br>c.1270C>T                         | p.Arg419Cys;<br>p.Arg424Cys                                 | 0   | FALSE | chr7:81350062:G:A  | 188:chr7:81350062:G:A  | 0.001325 |
| 82_c5-1 | 82 | TP53              | HIGH               | c.109C>T;<br>c.190C>T;<br>c.469C>T;<br>c.586C>T | p.Arg37*;<br>p.Arg64*;<br>p.Arg157*;<br>p.Arg196*           | 191 | FALSE | chr17:7578263:G:A  | 188:chr17:7578263:G:A  | 0.135036 |
| 82_c5-1 | 82 | TP53              | MODERATE           | c.337G>A;<br>c.418G>A;<br>c.697G>A;<br>c.814G>A | p.Val113Met;<br>p.Val140Met;<br>p.Val233Met;<br>p.Val272Met | 85  | FALSE | chr17:7577124:C:T  | 188:chr17:7577124:C:T  | 0.016622 |
| 82_c5-1 | 82 | FLT3              | MODERATE           | c.393G>C                                        | p.Leu131Phe                                                 | 0   | FALSE | chr13:28631575:C:G | 188:chr13:28631575:C:G | 0.001705 |
| 82_c5-1 | 82 | APC               | MODERATE           | c.1708G>A;<br>c.1762G>A                         | p.Val570Ile;<br>p.Val588Ile                                 | 0   | FALSE | chr5:112170666:G:A | 188:chr5:112170666:G:A | 0.001182 |
| 82_c5-1 | 82 | APC               | HIGH               | c.1042C>T;<br>c.988C>T                          | p.Arg348*;<br>p.Arg330*                                     | 0   | FALSE | chr5:112154771:C:T | 188:chr5:112154771:C:T | 0.001607 |
| 82_c5-1 | 82 | EGFR              | MODERATE           | c.1061C>T                                       | p.Thr354Met                                                 | 1   | FALSE | chr7:55224280:C:T  | 188:chr7:55224280:C:T  | 0.001259 |

|         |    |                           |                    |                                                                                                    |                                                              |      |       |                        |                                |          |
|---------|----|---------------------------|--------------------|----------------------------------------------------------------------------------------------------|--------------------------------------------------------------|------|-------|------------------------|--------------------------------|----------|
| 82_c5-1 | 82 | NTRK1                     | MODERATE           | c.1940T>G;<br>; c.2030T>G;<br>; c.2048T>G                                                          | p.Val647Gly;<br>p.Val677Gly;<br>p.Val683Gly                  | 2    | FALSE | chr1:1568<br>49792:T:G | 188:chr1:1<br>56849792:<br>T:G | 0.007098 |
| 82_c5-1 | 82 | CDKN2A                    | MODIFIER; MODERATE | c.194-<br>3568A>C;<br>c.52A>C                                                                      | ; p.Thr18Pro                                                 | 1    | FALSE | chr9:2197<br>4775:T:G  | 188:chr9:2<br>1974775:T<br>:G  | 0.007563 |
| 82_c5-1 | 82 | IGF1R                     | MODERATE           | c.755G>A                                                                                           | p.Arg252His                                                  | 0    | FALSE | chr15:994<br>34668:G:A | 188:chr15:<br>99434668:<br>G:A | 0.001285 |
| 82_c5-1 | 82 | SMO                       | MODERATE           | c.1640G>A                                                                                          | p.Arg547His                                                  | 0    | FALSE | chr7:1288<br>50377:G:A | 188:chr7:1<br>28850377:<br>G:A | 0.001298 |
| 82_c5-1 | 82 | IGF1R                     | MODERATE           | c.3905T>C;<br>c.3908T>C                                                                            | p.Val1302Al<br>a;<br>p.Val1303Al<br>a                        | 0    | FALSE | chr15:995<br>00475:T:C | 188:chr15:<br>99500475:<br>T:C | 0.004929 |
| 82_c5-1 | 82 | MAP2K1                    | MODERATE           | c.692C>T                                                                                           | p.Ser231Leu                                                  | 1    | FALSE | chr15:667<br>74216:C:T | 188:chr15:<br>66774216:<br>C:T | 0.001487 |
| 82_c5-1 | 82 | DDR2                      | MODERATE           | c.1625C>T                                                                                          | p.Ala542Val                                                  | 1    | FALSE | chr1:1627<br>41934:C:T | 188:chr1:1<br>62741934:<br>C:T | 0.000745 |
| 82_c5-1 | 82 | IGF1R                     | MODERATE           | c.1828G>A                                                                                          | p.Val610Ile                                                  | 0    | FALSE | chr15:994<br>56511:G:A | 188:chr15:<br>99456511:<br>G:A | 0.001192 |
| 82_c5-1 | 82 | PIK3CA                    | MODERATE           | c.1633G>A                                                                                          | p.Glu545Lys                                                  | 1189 | FALSE | chr3:1789<br>36091:G:A | 188:chr3:1<br>78936091:<br>G:A | 0.115237 |
| 82_c5-1 | 82 | NF1                       | MODIFIER; HIGH     | c.*2165G><br>A;<br>c.2087G>A                                                                       | ; p.Trp696*                                                  | 2    | FALSE | chr17:295<br>53538:G:A | 188:chr17:<br>29553538:<br>G:A | 0.001106 |
| 82_c5-1 | 82 | AR                        | MODERATE           | c.2086G>A<br>; c.490G>A                                                                            | p.Asp696As<br>n;<br>p.Asp164As<br>n                          | 0    | FALSE | chrX:6693<br>1444:G:A  | 188:chrX:6<br>6931444:G<br>:A  | 0.001062 |
| 82_c5-1 | 82 | C9orf53;<br>CDKN2A        | MODIFIER; MODERATE | n.*616C>G<br>;<br>c.*140G>C<br>;<br>c.217G>C;<br>c.260G>C                                          | ; p.Ala73Pro;<br>p.Arg87Pro                                  | 1    | FALSE | chr9:2197<br>1141:C:G  | 188:chr9:2<br>1971141:C<br>:G  | 0.021651 |
| 82_c5-1 | 82 | PTEN                      | MODERATE           | c.574G>A                                                                                           | p.Ala192Thr                                                  | 1    | FALSE | chr10:897<br>11956:G:A | 188:chr10:<br>89711956:<br>G:A | 0.001217 |
| 82_c5-1 | 82 | MIR1225;<br>PKD1;<br>TSC2 | MODIFIER; MODERATE | n.*90C>T;<br>c.*13118C<br>>T;<br>c.*13121C<br>>T;<br>c.4954G>A<br>;<br>c.5086G>A<br>;<br>c.5155G>A | ; p.Ala1652Th<br>r;<br>p.Ala1696Th<br>r;<br>p.Ala1719Th<br>r | 0    | FALSE | chr16:213<br>8135:G:A  | 188:chr16:<br>2138135:G<br>:A  | 0.0012   |

|         |    |                             |                    |                                                                                                  |                                                                                             |    |       |                    |                        |          |
|---------|----|-----------------------------|--------------------|--------------------------------------------------------------------------------------------------|---------------------------------------------------------------------------------------------|----|-------|--------------------|------------------------|----------|
| 82_c5-1 | 82 | GNA11                       | MODERATE           | c.1030G>A                                                                                        | p.Val344Met                                                                                 | 1  | FALSE | chr19:3121127:G:A  | 188:chr19:3121127:G:A  | 0.001217 |
| 82_c5-1 | 82 | TP53                        | HIGH               | c.152C>G;<br>c.431C>G;<br>c.548C>G;<br>c.71C>G                                                   | p.Ser51*;<br>p.Ser144*;<br>p.Ser183*;<br>p.Ser24*                                           | 26 | FALSE | chr17:7578382:G:C  | 188:chr17:7578382:G:C  | 0.001144 |
| 82_c5-1 | 82 | TP53                        | MODERATE           | c.406C>T;<br>c.487C>T;<br>c.766C>T;<br>c.883C>T                                                  | p.Pro136Ser;<br>p.Pro163Ser;<br>p.Pro256Ser;<br>p.Pro295Ser                                 | 2  | FALSE | chr17:7577055:G:A  | 188:chr17:7577055:G:A  | 0.001173 |
| 82_c5-1 | 82 | MET                         | MODERATE           | c.1829G>A                                                                                        | p.Cys610Tyr                                                                                 | 2  | FALSE | chr7:116395536:G:A | 188:chr7:116395536:G:A | 0.000996 |
| 82_c5-1 | 82 | EGFR                        | MODIFIER; MODERATE | c.*2364C>T;<br>c.2165C>T                                                                         | p.Ala722Val                                                                                 | 2  | FALSE | chr7:55241717:C:T  | 188:chr7:55241717:C:T  | 0.001129 |
| 82_c5-1 | 82 | ERBB2;<br>MIEN1;<br>MIR4728 | MODIFIER; MODERATE | c.3160-213A>G;<br>c.3251A>G;<br>c.3296A>G;<br>c.3341A>G;<br>n.3665A>G;<br>c.*388T>C;<br>n.*67A>G | p.Glu1084Gly;<br>p.Glu1099Gly;<br>p.Glu1114Gly                                              | 1  | FALSE | chr17:37883729:A:G | 188:chr17:37883729:A:G | 0.004566 |
| 82_c5-1 | 82 | NTRK2                       | MODERATE           | c.250G>A                                                                                         | p.Glu84Lys                                                                                  | 0  | FALSE | chr9:87317111:G:A  | 188:chr9:87317111:G:A  | 0.001089 |
| 82_c5-1 | 82 | FGFR1                       | MODERATE           | c.1051G>A;<br>c.685G>A;<br>c.691G>A;<br>c.934G>A;<br>c.952G>A;<br>c.958G>A                       | p.Asp351Asn;<br>p.Asp229Asn;<br>p.Asp231Asn;<br>p.Asp312Asn;<br>p.Asp318Asn;<br>p.Asp320Asn | 1  | FALSE | chr8:38279438:C:T  | 188:chr8:38279438:C:T  | 0.001359 |
| 82_c5-1 | 82 | FGFR3                       | MODERATE           | c.1177G>A;<br>c.1513G>A;<br>c.1519G>A                                                            | p.Val393Ile;<br>p.Val505Ile;<br>p.Val507Ile                                                 | 1  | FALSE | chr4:1807182:G:A   | 188:chr4:1807182:G:A   | 0.001521 |

|         |    |                    |                            |                                                       |                                             |   |       |                        |                                |          |
|---------|----|--------------------|----------------------------|-------------------------------------------------------|---------------------------------------------|---|-------|------------------------|--------------------------------|----------|
| 82_c5-1 | 82 | KLLN;<br>PTEN      | MODIFIER; MODERATE         | c.-951C>T;<br>c.32G>A                                 | p.Arg11Lys                                  | 1 | FALSE | chr10:896<br>24258:G:A | 188:chr10:<br>89624258:<br>G:A | 0.001377 |
| 82_c5-1 | 82 | EGFR;<br>EGFR-AS1  | MODERATE; MODIFIER         | c.2387G>A<br>;<br>n.1175C>T                           | p.Gly796Asp                                 | 3 | FALSE | chr7:5524<br>9089:G:A  | 188:chr7:5<br>5249089:G<br>:A  | 0.001634 |
| 82_c5-1 | 82 | NF1                | MODERATE                   | c.2695T>G                                             | p.Leu899Val                                 | 3 | FALSE | chr17:295<br>56328:T:G | 188:chr17:<br>29556328:<br>T:G | 0.002036 |
| 82_c5-1 | 82 | EGFR;<br>EGFR-AS1  | MODERATE; MODIFIER         | c.2327G>A<br>;<br>n.1235C>T                           | p.Arg776His                                 | 7 | FALSE | chr7:5524<br>9029:G:A  | 188:chr7:5<br>5249029:G<br>:A  | 0.001108 |
| 82_c5-1 | 82 | NTRK3              | MODERATE                   | c.265C>T                                              | p.Arg89Cys                                  | 0 | FALSE | chr15:887<br>27514:G:A | 188:chr15:<br>88727514:<br>G:A | 0.001356 |
| 82_c5-1 | 82 | DDR2               | MODERATE                   | c.1963G>A                                             | p.Glu655Lys                                 | 1 | FALSE | chr1:1627<br>45548:G:A | 188:chr1:1<br>62745548:<br>G:A | 0.000881 |
| 82_c5-1 | 82 | INSRR;<br>NTRK1    | MODIFIER; MODERATE         | c.3397+24<br>A>G;<br>c.17T>C                          | p.Leu6Pro                                   | 1 | FALSE | chr1:1568<br>11880:T:C | 188:chr1:1<br>56811880:<br>T:C | 0.000907 |
| 82_c5-1 | 82 | SMO                | MODERATE                   | c.869G>A                                              | p.Arg290His                                 | 0 | FALSE | chr7:1288<br>45572:G:A | 188:chr7:1<br>28845572:<br>G:A | 0.001093 |
| 82_c5-1 | 82 | C9orf53;<br>CDKN2A | MODIFIER; MODERATE;<br>LOW | n.*616A>G<br>;<br>c.*117T>C;<br>c.194T>C;<br>c.237T>C | p.Leu65Pro;<br>p.Ala79Ala                   | 3 | FALSE | chr9:2197<br>1164:A:G  | 188:chr9:2<br>1971164:A<br>:G  | 0.010727 |
| 82_c5-1 | 82 | NTRK3              | MODERATE                   | c.389G>A                                              | p.Arg130His                                 | 0 | FALSE | chr15:887<br>26655:C:T | 188:chr15:<br>88726655:<br>C:T | 0.003876 |
| 82_c5-1 | 82 | RET                | MODERATE                   | c.1690A>C                                             | p.Thr564Pro                                 | 1 | FALSE | chr10:436<br>08342:A:C | 188:chr10:<br>43608342:<br>A:C | 0.005053 |
| 82_c5-1 | 82 | TSC1               | MODERATE                   | c.1823C>T;<br>c.1973C>T;<br>c.1976C>T                 | p.Ala608Val;<br>p.Ala658Val;<br>p.Ala659Val | 0 | FALSE | chr9:1357<br>80989:G:A | 188:chr9:1<br>35780989:<br>G:A | 0.001195 |
| 82_c5-1 | 82 | EGFR;<br>EGFR-AS1  | MODERATE; MODIFIER         | c.2548C>A<br>; n.-1G>T                                | p.His850Asn                                 | 1 | FALSE | chr7:5525<br>9490:C:A  | 188:chr7:5<br>5259490:C<br>:A  | 0.001206 |
| 82_c5-1 | 82 | EPHA3              | MODERATE                   | c.2530C>T                                             | p.Pro844Ser                                 | 0 | FALSE | chr3:8949<br>9360:C:T  | 188:chr3:8<br>9499360:C<br>:T  | 0.001186 |
| 82_c5-1 | 82 | KIT                | MODERATE                   | c.2671G>A<br>;<br>c.2683G>A                           | p.Ala891Thr<br>;<br>p.Ala895Thr             | 3 | FALSE | chr4:5560<br>2973:G:A  | 188:chr4:5<br>5602973:G<br>:A  | 0.000923 |
| 82_c5-1 | 82 | VHL                | MODIFIER; MODERATE         | c.341-<br>3217A>T;<br>c.397A>T                        | p.Thr133Ser                                 | 0 | FALSE | chr3:1018<br>8254:A:T  | 188:chr3:1<br>0188254:A<br>:T  | 0.001311 |

|           |    |                             |                    |                                                                               |                                                                                                                 |     |       |                        |                                |          |
|-----------|----|-----------------------------|--------------------|-------------------------------------------------------------------------------|-----------------------------------------------------------------------------------------------------------------|-----|-------|------------------------|--------------------------------|----------|
| 82_c5-1   | 82 | FGFR1                       | MODERATE           | c.475C>T;<br>c.481C>T;<br>c.724C>T;<br>c.742C>T;<br>c.748C>T;<br>c.841C>T     | p.Arg159Trp<br>;<br>p.Arg161Trp<br>;<br>p.Arg242Trp<br>;<br>p.Arg248Trp<br>;<br>p.Arg250Trp<br>;<br>p.Arg281Trp | 2   | FALSE | chr8:3828<br>2215:G:A  | 188:chr8:3<br>8282215:G<br>:A  | 0.001676 |
| 82_c5-1   | 82 | ERBB2;<br>MIEN1;<br>MIR4728 | MODERATE; MODIFIER | c.2818C>T;<br>c.2863C>T;<br>c.2908C>T;<br>n.3232C>T<br>c.*388G>A<br>;n.*67C>T | p.Arg940Trp<br>;<br>p.Arg955Trp<br>;<br>p.Arg970Trp                                                             | 2   | FALSE | chr17:378<br>82850:C:T | 188:chr17:<br>37882850:<br>C:T | 0.001004 |
| 11_t2c1-1 | 11 | FGFR3                       | MODERATE           | c.1409G>T<br>;<br>c.1745G>T<br>;<br>c.1751G>T                                 | p.Cys470Ph<br>e;<br>p.Cys582Ph<br>e;<br>p.Cys584Ph<br>e                                                         | 1   | FALSE | chr4:1807<br>576:G:T   | 189:chr4:1<br>807576:G:<br>T   | 0.004926 |
| 11_t2c1-1 | 11 | KIT                         | MODERATE           | c.1485C>A                                                                     | p.Asn495Lys                                                                                                     | 1   | FALSE | chr4:5559<br>2161:C:A  | 189:chr4:5<br>5592161:C<br>:A  | 0.001285 |
| 11_t2c1-1 | 11 | PIK3CA                      | MODERATE           | c.1645G>A                                                                     | p.Asp549As<br>n                                                                                                 | 4   | FALSE | chr3:1789<br>36103:G:A | 189:chr3:1<br>78936103:<br>G:A | 0.001177 |
| 11_t2c1-1 | 11 | TP53                        | MODERATE           | c.131G>T;<br>c.410G>T;<br>c.50G>T;<br>c.527G>T                                | p.Cys44Phe;<br>p.Cys137Ph<br>e;<br>p.Cys17Phe;<br>p.Cys176Ph<br>e                                               | 143 | FALSE | chr17:757<br>8403:C:A  | 189:chr17:<br>7578403:C<br>:A  | 0.002407 |
| 11_t2c1-1 | 11 | NF1                         | MODERATE           | c.6405C>A<br>;<br>c.6468C>A                                                   | p.Phe2135L<br>eu;<br>p.Phe2156L<br>eu                                                                           | 1   | FALSE | chr17:296<br>64426:C:A | 189:chr17:<br>29664426:<br>C:A | 0.001812 |
| 11_t2c1-1 | 11 | AKT3                        | MODERATE           | c.44G>T                                                                       | p.Arg15Met                                                                                                      | 0   | FALSE | chr1:2440<br>06429:C:A | 189:chr1:2<br>44006429:<br>C:A | 0.001232 |
| 11_t2c1-1 | 11 | EGFR                        | MODERATE           | c.1159C>G                                                                     | p.Leu387Val                                                                                                     | 1   | FALSE | chr7:5522<br>4477:C:G  | 189:chr7:5<br>5224477:C<br>:G  | 0.001089 |
| 11_t2c1-1 | 11 | ROS1                        | MODERATE           | c.5890G>A                                                                     | p.Ala1964Th<br>r                                                                                                | 1   | FALSE | chr6:1176<br>41081:C:T | 189:chr6:1<br>17641081:<br>C:T | 0.001085 |

|           |    |                    |                    |                                                                           |                                                                                                                 |     |       |                        |                                |          |
|-----------|----|--------------------|--------------------|---------------------------------------------------------------------------|-----------------------------------------------------------------------------------------------------------------|-----|-------|------------------------|--------------------------------|----------|
| 11_t2c1-1 | 11 | TP53               | HIGH               | c.379G>T;<br>c.460G>T;<br>c.739G>T;<br>c.856G>T                           | p.Glu127*;<br>p.Glu154*;<br>p.Glu247*;<br>p.Glu286*                                                             | 82  | FALSE | chr17:757<br>7082:C:A  | 189:chr17:<br>7577082:C<br>:A  | 0.001211 |
| 11_t2c1-1 | 11 | FGFR1              | MODERATE           | c.488G>T;<br>c.494G>T;<br>c.737G>T;<br>c.755G>T;<br>c.761G>T;<br>c.854G>T | p.Arg163Leu<br>;<br>p.Arg165Leu<br>;<br>p.Arg246Leu<br>;<br>p.Arg252Leu<br>;<br>p.Arg254Leu<br>;<br>p.Arg285Leu | 1   | FALSE | chr8:3828<br>2202:C:A  | 189:chr8:3<br>8282202:C<br>:A  | 0.00093  |
| 11_t2c1-1 | 11 | TP53               | MODERATE           | c.400G>T;<br>c.481G>T;<br>c.760G>T;<br>c.877G>T                           | p.Gly134Trp<br>;<br>p.Gly161Trp<br>;<br>p.Gly254Trp<br>;<br>p.Gly293Trp                                         | 4   | FALSE | chr17:757<br>7061:C:A  | 189:chr17:<br>7577061:C<br>:A  | 0.001074 |
| 11_t2c1-1 | 11 | TP53               | MODIFIER; MODERATE | c.-3G>T;<br>c.358G>T;<br>c.475G>T;<br>c.79G>T                             | p.Ala120Ser;<br>p.Ala159Ser;<br>p.Ala27Ser                                                                      | 23  | FALSE | chr17:757<br>8455:C:A  | 189:chr17:<br>7578455:C<br>:A  | 0.002177 |
| 11_t2c1-1 | 11 | TP53               | MODERATE           | c.368G>T;<br>c.449G>T;<br>c.728G>T;<br>c.845G>T                           | p.Arg123Leu<br>;<br>p.Arg150Leu<br>;<br>p.Arg243Leu<br>;<br>p.Arg282Leu                                         | 26  | FALSE | chr17:757<br>7093:C:A  | 189:chr17:<br>7577093:C<br>:A  | 0.001189 |
| 11_t2c1-1 | 11 | EPHA3              | HIGH               | c.1643C>A                                                                 | p.Ser548*                                                                                                       | 0   | FALSE | chr3:8945<br>6467:C:A  | 189:chr3:8<br>9456467:C<br>:A  | 0.001059 |
| 11_t2c1-1 | 11 | HOXD-AS2;<br>HOXD8 | MODIFIER; MODERATE | n.*692G>T<br>; c.22C>A;<br>c.574C>A                                       | p.Gln8Lys;<br>p.Gln192Lys                                                                                       | 0   | FALSE | chr2:1769<br>95668:C:A | 189:chr2:1<br>76995668:<br>C:A | 0.002408 |
| 11_t2c1-1 | 11 | ALK                | MODERATE           | c.1359G>T                                                                 | p.Gln453His                                                                                                     | 1   | FALSE | chr2:2955<br>1271:C:A  | 189:chr2:2<br>9551271:C<br>:A  | 0.0013   |
| 11_t2c1-1 | 11 | TP53               | MODERATE           | c.340C>T;<br>c.421C>T;<br>c.700C>T;<br>c.817C>T                           | p.Arg114Cys<br>;<br>p.Arg141Cys<br>;<br>p.Arg234Cys<br>;<br>p.Arg273Cys                                         | 601 | FALSE | chr17:757<br>7121:G:A  | 189:chr17:<br>7577121:G<br>:A  | 0.001194 |



|           |    |        |                    |                                                                           |                                                                                                            |   |       |                            |                                 |          |
|-----------|----|--------|--------------------|---------------------------------------------------------------------------|------------------------------------------------------------------------------------------------------------|---|-------|----------------------------|---------------------------------|----------|
| 11_t2c1-1 | 11 | CTNNB1 | MODERATE           | c.131C>A                                                                  | p.Pro44His                                                                                                 | 0 | FALSE | chr3:4126<br>6134:C:A      | 189:chr3:4<br>1266134:C<br>:A   | 0.0011   |
| 11_t2c1-1 | 11 | AKT1   | MODERATE           | c.1099C>T                                                                 | p.Arg367Cys                                                                                                | 1 | FALSE | chr14:105<br>239288:G<br>A | 189:chr14:<br>10523928<br>8:G:A | 0.001259 |
| 11_t2c1-1 | 11 | CTNNB1 | MODERATE           | c.884C>A                                                                  | p.Ala295Asp                                                                                                | 0 | FALSE | chr3:4126<br>7300:C:A      | 189:chr3:4<br>1267300:C<br>:A   | 0.004566 |
| 11_t2c1-1 | 11 | ALK    | MODERATE           | c.4409C>T                                                                 | p.Ala1470Val                                                                                               | 1 | FALSE | chr2:2941<br>6544:G:A      | 189:chr2:2<br>9416544:G<br>:A   | 0.000927 |
| 11_t2c1-1 | 11 | FGFR1  | MODERATE           | c.292C>T;<br>c.298C>T;<br>c.541C>T;<br>c.559C>T;<br>c.565C>T;<br>c.658C>T | p.Arg98Cys;<br>p.Arg100Cys<br>;<br>p.Arg181Cys<br>;<br>p.Arg187Cys<br>;<br>p.Arg189Cys<br>;<br>p.Arg220Cys | 1 | FALSE | chr8:3828<br>5495:G:A      | 189:chr8:3<br>8285495:G<br>:A   | 0.001093 |
| 11_t2c1-1 | 11 | NF1    | MODERATE           | c.7352C>A<br>;<br>c.7415C>A                                               | p.Pro2451His<br>;<br>p.Pro2472His<br>s                                                                     | 6 | FALSE | chr17:296<br>77294:C:A     | 189:chr17:<br>29677294:<br>C:A  | 0.001122 |
| 11_t2c1-1 | 11 | ERBB2  | MODERATE; MODIFIER | c.560G>A;<br>c.605G>A;<br>c.650G>A;<br>n.974G>A                           | p.Arg187His<br>;<br>p.Arg202His<br>;<br>p.Arg217His<br>;                                                   | 1 | FALSE | chr17:378<br>66345:G:A     | 189:chr17:<br>37866345:<br>G:A  | 0.001058 |
| 11_t2c1-1 | 11 | DDR2   | MODERATE           | c.313C>A                                                                  | p.Arg105Ser                                                                                                | 2 | FALSE | chr1:1627<br>24541:C:A     | 189:chr1:1<br>62724541:<br>C:A  | 0.001453 |
| 11_t2c1-1 | 11 | PTEN   | HIGH               | c.844G>T                                                                  | p.Gly282*                                                                                                  | 1 | FALSE | chr10:897<br>20693:G:T     | 189:chr10:<br>89720693:<br>G:T  | 0.002119 |
| 11_t2c1-1 | 11 | CTNNB1 | MODERATE           | c.134C>G                                                                  | p.Ser45Cys                                                                                                 | 0 | FALSE | chr3:4126<br>6137:C:G      | 189:chr3:4<br>1266137:C<br>:G   | 0.001092 |
| 11_t2c1-1 | 11 | HGF    | MODERATE           | c.251G>T                                                                  | p.Cys84Phe                                                                                                 | 0 | FALSE | chr7:8139<br>2026:C:A      | 189:chr7:8<br>1392026:C<br>:A   | 0.001572 |
| 11_t2c1-1 | 11 | CTNNB1 | MODERATE           | c.86C>A                                                                   | p.Ser29Tyr                                                                                                 | 0 | FALSE | chr3:4126<br>6089:C:A      | 189:chr3:4<br>1266089:C<br>:A   | 0.001769 |
| 11_t2c1-1 | 11 | PTEN   | HIGH               | c.633C>A                                                                  | p.Cys211*                                                                                                  | 2 | FALSE | chr10:897<br>12015:C:A     | 189:chr10:<br>89712015:<br>C:A  | 0.002262 |
| 11_t2c1-1 | 11 | NF1    | HIGH               | c.6792C>A<br>;<br>c.6855C>A                                               | p.Tyr2264*;<br>p.Tyr2285*                                                                                  | 2 | FALSE | chr17:296<br>65757:C:A     | 189:chr17:<br>29665757:<br>C:A  | 0.001376 |

|           |    |                   |                    |                                                   |                                                               |       |       |                        |                                |          |
|-----------|----|-------------------|--------------------|---------------------------------------------------|---------------------------------------------------------------|-------|-------|------------------------|--------------------------------|----------|
| 11_t2c1-1 | 11 | TP53              | MODERATE           | c.248G>T;<br>c.329G>T;<br>c.608G>T;<br>c.725G>T   | p.Cys83Phe;<br>p.Cys110Phe;<br>p.Cys203Phe;<br>p.Cys242Phe    | 72    | FALSE | chr17:757<br>7556:C:A  | 189:chr17:<br>7577556:C<br>:A  | 0.001091 |
| 11_t2c1-1 | 11 | KRAS              | MODERATE           | c.35G>T                                           | p.Gly12Val                                                    | 11213 | FALSE | chr12:253<br>98284:C:A | 189:chr12:<br>25398284:<br>C:A | 0.052861 |
| 11_t2c1-1 | 11 | CTNNB1            | MODERATE           | c.1972G>T                                         | p.Val658Phe                                                   | 0     | FALSE | chr3:4127<br>8096:G:T  | 189:chr3:4<br>1278096:G<br>:T  | 0.001104 |
| 11_t2c1-1 | 11 | PTEN              | MODERATE           | c.829A>T                                          | p.Thr277Ser                                                   | 1     | FALSE | chr10:897<br>20678:A:T | 189:chr10:<br>89720678:<br>A:T | 0.002805 |
| 11_t2c1-1 | 11 | TP53              | MODIFIER; MODERATE | c.-5G>T;<br>c.356G>T;<br>c.473G>T;<br>c.77G>T     | ; p.Arg119Leu<br>;<br>p.Arg158Leu<br>; p.Arg26Leu             | 80    | FALSE | chr17:757<br>8457:C:A  | 189:chr17:<br>7578457:C<br>:A  | 0.001483 |
| 11_t2c1-1 | 11 | TP53              | MODERATE; MODIFIER | c.115G>T;<br>c.232G>T;<br>c.-279G>T;<br>c.-360G>T | p.Ala39Ser;<br>p.Ala78Ser;                                    | 1     | FALSE | chr17:757<br>9455:C:A  | 189:chr17:<br>7579455:C<br>:A  | 0.002201 |
| 11_t2c1-1 | 11 | EGFR;<br>EGFR-AS1 | MODERATE; MODIFIER | c.2527G>A<br>; n.-1C>T                            | p.Val843Ile;                                                  | 6     | FALSE | chr7:5525<br>9469:G:A  | 189:chr7:5<br>5259469:G<br>:A  | 0.001263 |
| 11_t2c1-1 | 11 | KIT               | MODERATE           | c.1640C>A<br>;<br>c.1652C>A                       | p.Pro547His<br>;<br>p.Pro551His                               | 3     | FALSE | chr4:5559<br>3586:C:A  | 189:chr4:5<br>5593586:C<br>:A  | 0.001138 |
| 11_t2c1-1 | 11 | TP53              | MODERATE           | c.128G>A;<br>c.407G>A;<br>c.47G>A;<br>c.524G>A    | p.Arg43His;<br>p.Arg136His<br>;<br>p.Arg16His;<br>p.Arg175His | 979   | FALSE | chr17:757<br>8406:C:T  | 189:chr17:<br>7578406:C<br>:T  | 0.028834 |
| 11_t2c1-1 | 11 | RET               | MODERATE           | c.1690A>C                                         | p.Thr564Pro                                                   | 1     | FALSE | chr10:436<br>08342:A:C | 189:chr10:<br>43608342:<br>A:C | 0.001532 |

|           |    |                             |                    |                                                                                                                   |                                                                                                                 |     |       |                        |                                |          |
|-----------|----|-----------------------------|--------------------|-------------------------------------------------------------------------------------------------------------------|-----------------------------------------------------------------------------------------------------------------|-----|-------|------------------------|--------------------------------|----------|
| 11_t2c1-1 | 11 | ERBB2;<br>MIEN1;<br>MIR4728 | MODIFIER; MODERATE | c.*174C>A<br>;<br>c.3505C>A<br>;<br>c.3550C>A<br>;<br>c.3595C>A<br>;<br>n.3919C>A<br>;<br>c.*388G>T<br>; n.*67C>A | p.Pro1169T<br>hr;<br>p.Pro1184T<br>hr;<br>p.Pro1199T<br>hr                                                      | 2   | FALSE | chr17:378<br>84124:C:A | 189:chr17:<br>37884124:<br>C:A | 0.001134 |
| 11_t2c1-1 | 11 | NF1                         | MODERATE           | c.8070G>T<br>;<br>c.8133G>T                                                                                       | p.Leu2690P<br>he;<br>p.Leu2711P<br>he                                                                           | 1   | FALSE | chr17:296<br>86006:G:T | 189:chr17:<br>29686006:<br>G:T | 0.011099 |
| 11_t2c1-1 | 11 | ALK                         | MODERATE           | c.2629G>T                                                                                                         | p.Ala877Ser                                                                                                     | 1   | FALSE | chr2:2945<br>5173:C:A  | 189:chr2:2<br>9455173:C<br>:A  | 0.001181 |
| 11_t2c1-1 | 11 | CTNNB1                      | MODERATE           | c.110C>A                                                                                                          | p.Ser37Tyr                                                                                                      | 0   | FALSE | chr3:4126<br>6113:C:A  | 189:chr3:4<br>1266113:C<br>:A  | 0.001128 |
| 11_t2c1-1 | 11 | HOXD-AS2;<br>HOXD8          | MODIFIER; MODERATE | n.*692C>T<br>;<br>c.-123-<br>30G>A;<br>c.400G>A                                                                   | p.Ala134Thr                                                                                                     | 0   | FALSE | chr2:1769<br>95494:G:A | 189:chr2:1<br>76995494:<br>G:A | 0.001354 |
| 11_t2c1-1 | 11 | CTNNB1                      | MODERATE           | c.122C>A                                                                                                          | p.Thr41Asn                                                                                                      | 0   | FALSE | chr3:4126<br>6125:C:A  | 189:chr3:4<br>1266125:C<br>:A  | 0.001117 |
| 11_t2c1-1 | 11 | FGFR1                       | MODERATE           | c.487C>T;<br>c.493C>T;<br>c.736C>T;<br>c.754C>T;<br>c.760C>T;<br>c.853C>T                                         | p.Arg163Trp<br>;<br>p.Arg165Trp<br>;<br>p.Arg246Trp<br>;<br>p.Arg252Trp<br>;<br>p.Arg254Trp<br>;<br>p.Arg285Trp | 1   | FALSE | chr8:3828<br>2203:G:A  | 189:chr8:3<br>8282203:G<br>:A  | 0.00093  |
| 11_t2c1-1 | 11 | ALK                         | HIGH               | c.1651C>T                                                                                                         | p.Arg551*                                                                                                       | 2   | FALSE | chr2:2951<br>9920:G:A  | 189:chr2:2<br>9519920:G<br>:A  | 0.00105  |
| 11_t2c1-1 | 11 | EPHA3                       | MODERATE           | c.2662C>A                                                                                                         | p.Leu888Me<br>t                                                                                                 | 0   | FALSE | chr3:8949<br>9492:C:A  | 189:chr3:8<br>9499492:C<br>:A  | 0.001554 |
| 11_t2c1-1 | 11 | ROS1                        | HIGH               | c.5209G>T                                                                                                         | p.Glu1737*                                                                                                      | 2   | FALSE | chr6:1176<br>58374:C:A | 189:chr6:1<br>17658374:<br>C:A | 0.001282 |
| 11_t2c1-1 | 11 | TP53                        | MODIFIER; MODERATE | c.-9G>T;<br>c.352G>T;<br>c.469G>T;<br>c.73G>T                                                                     | p.Val118Phe<br>;<br>p.Val157Phe<br>;<br>p.Val25Phe                                                              | 169 | FALSE | chr17:757<br>8461:C:A  | 189:chr17:<br>7578461:C<br>:A  | 0.001487 |

|           |    |                             |                    |                                                                                               |                                                                |    |       |                        |                                |          |
|-----------|----|-----------------------------|--------------------|-----------------------------------------------------------------------------------------------|----------------------------------------------------------------|----|-------|------------------------|--------------------------------|----------|
| 11_t2c1-1 | 11 | MAP2K1                      | MODERATE           | c.395C>T                                                                                      | p.Ala132Val                                                    | 1  | FALSE | chr15:667<br>29187:C:T | 189:chr15:<br>66729187:<br>C:T | 0.000891 |
| 11_t2c1-1 | 11 | MITF                        | MODIFIER; MODERATE | c.-45G>A;<br>; c.109G>A;<br>c.112G>A;<br>c.64G>A                                              | p.Ala37Thr;<br>p.Ala38Thr;<br>p.Ala22Thr                       | 0  | FALSE | chr3:6992<br>8292:G:A  | 189:chr3:6<br>9928292:G<br>:A  | 0.001181 |
| 11_t2c1-1 | 11 | PIK3CA                      | MODERATE           | c.518C>A                                                                                      | p.Ser173Tyr                                                    | 1  | FALSE | chr3:1789<br>17643:C:A | 189:chr3:1<br>78917643:<br>C:A | 0.001793 |
| 11_t2c1-1 | 11 | PTEN                        | MODERATE           | c.443C>A                                                                                      | p.Ala148Glu                                                    | 1  | FALSE | chr10:896<br>92959:C:A | 189:chr10:<br>89692959:<br>C:A | 0.001337 |
| 11_t2c1-1 | 11 | TP53                        | MODERATE           | c.151T>C;<br>c.430T>C;<br>c.547T>C;<br>c.70T>C                                                | p.Ser51Pro;<br>p.Ser144Pro<br>;<br>p.Ser183Pro<br>; p.Ser24Pro | 9  | FALSE | chr17:757<br>8383:A:G  | 189:chr17:<br>7578383:A<br>:G  | 0.001059 |
| 11_t2c1-1 | 11 | NF1                         | MODERATE           | c.2533T>C                                                                                     | p.Cys845Arg                                                    | 2  | FALSE | chr17:295<br>56166:T:C | 189:chr17:<br>29556166:<br>T:C | 0.001198 |
| 11_t2c1-1 | 11 | AKT3                        | MODERATE           | c.797A>G                                                                                      | p.Lys266Arg                                                    | 0  | FALSE | chr1:2437<br>36250:T:C | 189:chr1:2<br>43736250:<br>T:C | 0.00253  |
| 11_t2c1-1 | 11 | ERBB2;<br>MIEN1;<br>MIR4728 | MODERATE; MODIFIER | c.2434G>A<br>;<br>c.2479G>A<br>;<br>c.2524G>A<br>;<br>n.2848G>A<br>;<br>c.*388C>T;<br>n.-1G>A | p.Val812Ile;<br>p.Val827Ile;<br>p.Val842Ile;                   | 17 | FALSE | chr17:378<br>81332:G:A | 189:chr17:<br>37881332:<br>G:A | 0.001052 |
| 11_t2c1-1 | 11 | FGFR1                       | MODIFIER; MODERATE | c.-85G>T;<br>c.107G>T;<br>c.8G>T                                                              | ; p.Ser36Ile;<br>p.Ser3Ile                                     | 1  | FALSE | chr8:3831<br>4957:C:A  | 189:chr8:3<br>8314957:C<br>:A  | 0.002812 |
| 11_t2c1-1 | 11 | TP53                        | MODERATE           | c.349G>T;<br>c.430G>T;<br>c.709G>T;<br>c.826G>T                                               | p.Ala117Ser;<br>p.Ala144Ser;<br>p.Ala237Ser;<br>p.Ala276Ser    | 16 | FALSE | chr17:757<br>7112:C:A  | 189:chr17:<br>7577112:C<br>:A  | 0.001198 |
| 11_t2c1-1 | 11 | KIT                         | MODERATE           | c.530G>A                                                                                      | p.Arg177His                                                    | 1  | FALSE | chr4:5556<br>4642:G:A  | 189:chr4:5<br>5564642:G<br>:A  | 0.000909 |

|           |    |                   |                    |                                                                                  |                                                                         |    |       |                        |                                |          |
|-----------|----|-------------------|--------------------|----------------------------------------------------------------------------------|-------------------------------------------------------------------------|----|-------|------------------------|--------------------------------|----------|
| 11_t2c1-1 | 11 | TP53              | MODERATE; MODIFIER | c.100G>T;<br>c.217G>T;<br>c.-279G>T;<br>c.-360G>T                                | p.Val34Leu;<br>p.Val73Leu;                                              | 5  | FALSE | chr17:757<br>9470:C:A  | 189:chr17:<br>7579470:C<br>:A  | 0.001475 |
| 60_bl-2   | 60 | EGFR;<br>EGFR-AS1 | MODERATE; MODIFIER | c.2568T>G<br>; n.-1A>C                                                           | p.Phe856Leu;                                                            | 1  | FALSE | chr7:5525<br>9510:T:G  | 190:chr7:5<br>5259510:T<br>:G  | 0.001733 |
| 60_bl-2   | 60 | TP53              | MODIFIER; MODERATE | c.*173G>T<br>; c.*85G>T;<br>c.1066G>T<br>;<br>c.589G>T;<br>c.670G>T;<br>c.949G>T | p.Gly356Trp<br>;<br>p.Gly197Trp<br>;<br>p.Gly224Trp<br>;<br>p.Gly317Trp | 2  | FALSE | chr17:757<br>3961:C:A  | 190:chr17:<br>7573961:C<br>:A  | 0.001332 |
| 60_bl-2   | 60 | AKT3              | HIGH               | c.289G>T                                                                         | p.Glu97*                                                                | 0  | FALSE | chr1:2438<br>09335:C:A | 190:chr1:2<br>43809335:<br>C:A | 0.002358 |
| 60_bl-2   | 60 | ALK               | MODERATE           | c.3512T>C                                                                        | p.Ile1171Thr                                                            | 5  | FALSE | chr2:2944<br>5213:A:G  | 190:chr2:2<br>9445213:A<br>:G  | 0.003096 |
| 60_bl-2   | 60 | CTNNB1            | MODERATE           | c.134C>A                                                                         | p.Ser45Tyr                                                              | 0  | FALSE | chr3:4126<br>6137:C:A  | 190:chr3:4<br>1266137:C<br>:A  | 0.002439 |
| 60_bl-2   | 60 | TP53              | MODIFIER; MODERATE | c.-5G>T;<br>c.356G>T;<br>c.473G>T;<br>c.77G>T                                    | p.Arg119Leu<br>;<br>p.Arg158Leu<br>; p.Arg26Leu                         | 80 | FALSE | chr17:757<br>8457:C:A  | 190:chr17:<br>7578457:C<br>:A  | 0.00283  |
| 60_bl-2   | 60 | HGF               | MODERATE           | c.251G>T                                                                         | p.Cys84Phe                                                              | 0  | FALSE | chr7:8139<br>2026:C:A  | 190:chr7:8<br>1392026:C<br>:A  | 0.002911 |
| 60_bl-2   | 60 | TP53              | MODERATE           | c.347G>T;<br>c.428G>T;<br>c.707G>T;<br>c.824G>T                                  | p.Cys116Phe;<br>p.Cys143Phe;<br>p.Cys236Phe;<br>p.Cys275Phe             | 57 | FALSE | chr17:757<br>7114:C:A  | 190:chr17:<br>7577114:C<br>:A  | 0.001776 |
| 60_bl-2   | 60 | EPHA3             | MODERATE           | c.1535G>A                                                                        | p.Arg512Gln                                                             | 0  | FALSE | chr3:8944<br>8571:G:A  | 190:chr3:8<br>9448571:G<br>:A  | 0.002037 |
| 60_bl-2   | 60 | CTNNB1            | MODERATE           | c.110C>A                                                                         | p.Ser37Tyr                                                              | 0  | FALSE | chr3:4126<br>6113:C:A  | 190:chr3:4<br>1266113:C<br>:A  | 0.001724 |
| 60_bl-2   | 60 | MAP2K1            | MODERATE           | c.371C>A                                                                         | p.Pro124Gln                                                             | 1  | FALSE | chr15:667<br>29163:C:A | 190:chr15:<br>66729163:<br>C:A | 0.001385 |
| 60_bl-2   | 60 | KIT               | MODERATE           | c.1486G>A                                                                        | p.Asp496Asn                                                             | 1  | FALSE | chr4:5559<br>2162:G:A  | 190:chr4:5<br>5592162:G<br>:A  | 0.001996 |

|         |    |                   |                    |                                                                                  |                                                                                        |     |       |                        |                                |          |
|---------|----|-------------------|--------------------|----------------------------------------------------------------------------------|----------------------------------------------------------------------------------------|-----|-------|------------------------|--------------------------------|----------|
| 60_bl-2 | 60 | EGFR;<br>EGFR-AS1 | MODERATE; MODIFIER | c.2410G>A<br>;<br>n.1152C>T                                                      | p.Glu804Lys<br>;                                                                       | 2   | FALSE | chr7:5524<br>9112:G:A  | 190:chr7:5<br>5249112:G<br>:A  | 0.001233 |
| 60_bl-2 | 60 | EGFR;<br>EGFR-AS1 | MODERATE; MODIFIER | c.2507G>A<br>;n.-1C>T                                                            | p.Arg836His<br>;                                                                       | 2   | FALSE | chr7:5525<br>9449:G:A  | 190:chr7:5<br>5259449:G<br>:A  | 0.001946 |
| 60_bl-2 | 60 | DDR2              | MODERATE           | c.313C>A                                                                         | p.Arg105Ser                                                                            | 2   | FALSE | chr1:1627<br>24541:C:A | 190:chr1:1<br>62724541:<br>C:A | 0.002594 |
| 60_bl-2 | 60 | MITF              | MODIFIER; MODERATE | c.93+115G<br>>A;<br>c.208G>A;<br>c.373G>A;<br>c.481G>A;<br>c.526G>A;<br>c.529G>A | p.Alc70Thr;<br>p.Alc125Thr<br>;<br>p.Alc161Thr<br>;<br>p.Alc176Thr<br>;<br>p.Alc177Thr | 0   | FALSE | chr3:6998<br>7147:G:A  | 190:chr3:6<br>9987147:G<br>:A  | 0.002394 |
| 60_bl-2 | 60 | KIT               | MODERATE           | c.875C>T                                                                         | p.Alc292Val                                                                            | 1   | FALSE | chr4:5557<br>0008:C:T  | 190:chr4:5<br>5570008:C<br>:T  | 0.001699 |
| 60_bl-2 | 60 | HRAS;<br>LRRCS6   | MODERATE; MODIFIER | c.183G>T;<br>c.-506C>A                                                           | p.Gln61His;<br>;                                                                       | 15  | FALSE | chr11:533<br>873:C:A   | 190:chr11:<br>533873:C:<br>A   | 0.001464 |
| 60_bl-2 | 60 | MET               | HIGH               | c.1639C>T                                                                        | p.Arg547*                                                                              | 2   | FALSE | chr7:1163<br>81017:C:T | 190:chr7:1<br>16381017:<br>C:T | 0.001284 |
| 60_bl-2 | 60 | RET               | MODERATE           | c.1991C>A                                                                        | p.Alc664Asp                                                                            | 2   | FALSE | chr10:436<br>10039:C:A | 190:chr10:<br>43610039:<br>C:A | 0.003731 |
| 60_bl-2 | 60 | TP53              | MODERATE           | c.359G>T;<br>c.440G>T;<br>c.719G>T;<br>c.836G>T                                  | p.Gly120Val;<br>p.Gly147Val;<br>p.Gly240Val;<br>p.Gly279Val                            | 37  | FALSE | chr17:757<br>7102:C:A  | 190:chr17:<br>7577102:C<br>:A  | 0.001701 |
| 60_bl-2 | 60 | MET               | MODERATE           | c.3443G>A<br>;<br>c.3497G>A                                                      | p.Arg1148Gl<br>n;<br>p.Arg1166Gl<br>n                                                  | 4   | FALSE | chr7:1164<br>18932:G:A | 190:chr7:1<br>16418932:<br>G:A | 0.001484 |
| 60_bl-2 | 60 | CTNNB1            | MODERATE           | c.1972G>T                                                                        | p.Val658Phe                                                                            | 0   | FALSE | chr3:4127<br>8096:G:T  | 190:chr3:4<br>1278096:G<br>:T  | 0.002646 |
| 60_bl-2 | 60 | EGFR              | MODERATE           | c.988G>A                                                                         | p.Glu330Lys                                                                            | 1   | FALSE | chr7:5522<br>3621:G:A  | 190:chr7:5<br>5223621:G<br>:A  | 0.001702 |
| 60_bl-2 | 60 | TP53              | MODERATE           | c.341G>A;<br>c.422G>A;<br>c.701G>A;<br>c.818G>A                                  | p.Arg114His<br>;<br>p.Arg141His<br>;<br>p.Arg234His<br>;<br>p.Arg273His                | 647 | TRUE  | chr17:757<br>7120:C:T  | 190:chr17:<br>7577120:C<br>:T  | 0.116801 |

|         |    |                   |                    |                                                                                                                                                                                                        |                                                                                                                      |     |       |                        |                                |          |
|---------|----|-------------------|--------------------|--------------------------------------------------------------------------------------------------------------------------------------------------------------------------------------------------------|----------------------------------------------------------------------------------------------------------------------|-----|-------|------------------------|--------------------------------|----------|
| 60_bl-2 | 60 | PIK3CA            | MODERATE           | c.1636C>A                                                                                                                                                                                              | p.Gln546Lys                                                                                                          | 127 | FALSE | chr3:1789<br>36094:C:A | 190:chr3:1<br>78936094:<br>C:A | 0.076118 |
| 60_bl-2 | 60 | TP53              | MODERATE           | c.112G>T;<br>c.193G>T;<br>c.472G>T;<br>c.589G>T                                                                                                                                                        | p.Val38Leu;<br>p.Val65Leu;<br>p.Val158Leu<br>;<br>p.Val197Leu                                                        | 12  | FALSE | chr17:757<br>8260:C:A  | 190:chr17:<br>7578260:C<br>:A  | 0.001456 |
| 60_bl-2 | 60 | MET               | MODERATE           | c.1450C>A                                                                                                                                                                                              | p.His484Asn                                                                                                          | 1   | FALSE | chr7:1163<br>80061:C:A | 190:chr7:1<br>16380061:<br>C:A | 0.00156  |
| 60_bl-2 | 60 | AKT3              | MODERATE           | c.44G>T                                                                                                                                                                                                | p.Arg15Met                                                                                                           | 0   | FALSE | chr1:2440<br>06429:C:A | 190:chr1:2<br>44006429:<br>C:A | 0.001759 |
| 60_bl-2 | 60 | PIK3CA            | MODERATE           | c.263G>A                                                                                                                                                                                               | p.Arg88Gln                                                                                                           | 97  | FALSE | chr3:1789<br>16876:G:A | 190:chr3:1<br>78916876:<br>G:A | 0.086194 |
| 60_bl-2 | 60 | EGFR;<br>EGFR-AS1 | MODERATE; MODIFIER | c.2591C>A<br>; n.-1G>T                                                                                                                                                                                 | p.Ala864Glu<br>;                                                                                                     | 2   | FALSE | chr7:5525<br>9533:C:A  | 190:chr7:5<br>5259533:C<br>:A  | 0.001779 |
| 60_bl-2 | 60 | HGF               | MODERATE           | c.2157G>T<br>;<br>c.2172G>T                                                                                                                                                                            | p.Lys719Asn<br>;<br>p.Lys724Asn                                                                                      | 0   | FALSE | chr7:8133<br>1912:C:A  | 190:chr7:8<br>1331912:C<br>:A  | 0.00177  |
| 60_bl-2 | 60 | CTNNB1            | MODERATE           | c.125C>A                                                                                                                                                                                               | p.Thr42Lys                                                                                                           | 0   | FALSE | chr3:4126<br>6128:C:A  | 190:chr3:4<br>1266128:C<br>:A  | 0.001658 |
| 60_bl-2 | 60 | EGFR;<br>EGFR-AS1 | MODERATE; MODIFIER | c.2305G>A<br>;<br>n.1257C>T                                                                                                                                                                            | p.Val769Me<br>t;                                                                                                     | 3   | FALSE | chr7:5524<br>9007:G:A  | 190:chr7:5<br>5249007:G<br>:A  | 0.00117  |
| 60_bl-2 | 60 | NF1               | HIGH               | c.5817C>A<br>;<br>c.5880C>A                                                                                                                                                                            | p.Cys1939*;<br>p.Cys1960*                                                                                            | 1   | FALSE | chr17:296<br>61923:C:A | 190:chr17:<br>29661923:<br>C:A | 0.004813 |
| 60_bl-2 | 60 | FGFR1;<br>LETM2   | MODERATE; MODIFIER | c.1777T>G<br>;<br>c.1783T>G<br>;<br>c.2020T>G<br>;<br>c.2044T>G<br>;<br>c.2050T>G<br>;<br>c.2143T>G<br>;<br>c.*1406A><br>C;<br>c.*1423A><br>C;<br>c.*1553A><br>C;<br>c.*1567A><br>C;<br>c.*1638A><br>C | p.Trp593Gly<br>;<br>p.Trp595Gly<br>;<br>p.Trp674Gly<br>;<br>p.Trp682Gly<br>;<br>p.Trp684Gly<br>;<br>p.Trp715Gly<br>; | 1   | FALSE | chr8:3827<br>1806:A:C  | 190:chr8:3<br>8271806:A<br>:C  | 0.003537 |

|         |    |                   |                    |                                                                           |                                                                                                                 |       |       |                        |                                |          |
|---------|----|-------------------|--------------------|---------------------------------------------------------------------------|-----------------------------------------------------------------------------------------------------------------|-------|-------|------------------------|--------------------------------|----------|
| 60_bl-2 | 60 | TP53              | MODERATE           | c.127C>T;<br>c.208C>T;<br>c.487C>T;<br>c.604C>T                           | p.Arg43Cys;<br>p.Arg70Cys;<br>p.Arg163Cys<br>;<br>p.Arg202Cys                                                   | 6     | FALSE | chr17:757<br>8245:G:A  | 190:chr17:<br>7578245:G<br>:A  | 0.001412 |
| 60_bl-2 | 60 | KRAS              | MODERATE           | c.35G>A                                                                   | p.Gly12Asp                                                                                                      | 11213 | FALSE | chr12:253<br>98284:C:T | 190:chr12:<br>25398284:<br>C:T | 0.102876 |
| 60_bl-2 | 60 | TP53              | HIGH; MODIFIER     | c.184G>T;<br>c.67G>T; c-<br>279G>T; c-<br>360G>T                          | p.Glu62*;<br>p.Glu23*;                                                                                          | 8     | FALSE | chr17:757<br>9503:C:A  | 190:chr17:<br>7579503:C<br>:A  | 0.002257 |
| 62_bl-2 | 62 | EPHA3             | MODERATE           | c.1132C>A                                                                 | p.Pro378Thr                                                                                                     | 0     | FALSE | chr3:8939<br>1066:C:A  | 191:chr3:8<br>9391066:C<br>:A  | 0.000709 |
| 62_bl-2 | 62 | EPHA3             | MODERATE           | c.1280C>T                                                                 | p.Ala427Val                                                                                                     | 0     | FALSE | chr3:8939<br>1214:C:T  | 191:chr3:8<br>9391214:C<br>:T  | 0.000859 |
| 62_bl-2 | 62 | PIK3CA            | MODERATE           | c.478C>A                                                                  | p.His160Asn                                                                                                     | 1     | FALSE | chr3:1789<br>17603:C:A | 191:chr3:1<br>78917603:<br>C:A | 0.002375 |
| 62_bl-2 | 62 | TP53              | MODERATE           | c.343G>T;<br>c.424G>T;<br>c.703G>T;<br>c.820G>T                           | p.Val115Phe<br>;<br>p.Val142Phe<br>;<br>p.Val235Phe<br>;<br>p.Val274Phe                                         | 25    | FALSE | chr17:757<br>7118:C:A  | 191:chr17:<br>7577118:C<br>:A  | 0.001517 |
| 62_bl-2 | 62 | TP53              | MODERATE           | c.126G>T;<br>c.207G>T;<br>c.486G>T;<br>c.603G>T                           | p.Leu42Phe;<br>p.Leu69Phe;<br>p.Leu162Ph<br>e;<br>p.Leu201Ph<br>e                                               | 4     | FALSE | chr17:757<br>8246:C:A  | 191:chr17:<br>7578246:C<br>:A  | 0.001183 |
| 62_bl-2 | 62 | EGFR;<br>EGFR-AS1 | MODERATE; MODIFIER | c.2591C>T;<br>n.-1G>A                                                     | p.Ala864Val;                                                                                                    | 2     | FALSE | chr7:5525<br>9533:C:T  | 191:chr7:5<br>5259533:C<br>:T  | 0.002114 |
| 62_bl-2 | 62 | CTNNB1            | MODERATE           | c.1345C>T                                                                 | p.Arg449Cys                                                                                                     | 0     | FALSE | chr3:4127<br>5179:C:T  | 191:chr3:4<br>1275179:C<br>:T  | 0.001744 |
| 62_bl-2 | 62 | FGFR1             | MODERATE           | c.475C>T;<br>c.481C>T;<br>c.724C>T;<br>c.742C>T;<br>c.748C>T;<br>c.841C>T | p.Arg159Trp<br>;<br>p.Arg161Trp<br>;<br>p.Arg242Trp<br>;<br>p.Arg248Trp<br>;<br>p.Arg250Trp<br>;<br>p.Arg281Trp | 2     | FALSE | chr8:3828<br>2215:G:A  | 191:chr8:3<br>8282215:G<br>:A  | 0.001352 |



|         |    |                   |                    |                                                   |                                                                         |    |       |                        |                                |          |
|---------|----|-------------------|--------------------|---------------------------------------------------|-------------------------------------------------------------------------|----|-------|------------------------|--------------------------------|----------|
| 62_bl-2 | 62 | EGFR;<br>EGFR-AS1 | LOW; MODIFIER      | c.2472C>A<br>; n.-1G>T                            | p.Gly824Gly<br>;                                                        | 1  | FALSE | chr7:5525<br>9414:C:A  | 191:chr7:5<br>5259414:C<br>:A  | 0.003361 |
| 62_bl-2 | 62 | PTEN              | MODERATE           | c.443C>A                                          | p.Ala148Glu                                                             | 1  | FALSE | chr10:896<br>92959:C:A | 191:chr10:<br>89692959:<br>C:A | 0.003663 |
| 62_bl-2 | 62 | DDR2              | MODERATE           | c.691C>A                                          | p.Gln231Lys                                                             | 1  | FALSE | chr1:1627<br>29605:C:A | 191:chr1:1<br>62729605:<br>C:A | 0.001991 |
| 62_bl-2 | 62 | RET               | MODERATE           | c.2242G>T                                         | p.Gly748Cys                                                             | 1  | FALSE | chr10:436<br>12137:G:T | 191:chr10:<br>43612137:<br>G:T | 0.001361 |
| 62_bl-2 | 62 | TP53              | MODERATE           | c.421C>T;<br>c.502C>T;<br>c.781C>T;<br>c.898C>T   | p.Pro141Ser<br>;<br>p.Pro168Ser<br>;<br>p.Pro261Ser<br>;<br>p.Pro300Ser | 3  | FALSE | chr17:757<br>7040:G:A  | 191:chr17:<br>7577040:G<br>:A  | 0.001556 |
| 62_bl-2 | 62 | HRAS;<br>LRRC56   | MODERATE; MODIFIER | c.383G>T;<br>c.-506C>A                            | p.Arg128Leu<br>;                                                        | 1  | FALSE | chr11:533<br>520:C:A   | 191:chr11:<br>533520:C:<br>A   | 0.001471 |
| 62_bl-2 | 62 | MAP2K1            | MODERATE           | c.722C>A                                          | p.Ser241Tyr                                                             | 2  | FALSE | chr15:667<br>77356:C:A | 191:chr15:<br>66777356:<br>C:A | 0.002201 |
| 62_bl-2 | 62 | PIK3CA            | HIGH               | c.816T>A                                          | p.Tyr272*                                                               | 1  | FALSE | chr3:1789<br>21334:T:A | 191:chr3:1<br>78921334:<br>T:A | 0.002317 |
| 62_bl-2 | 62 | EGFR              | MODIFIER; MODERATE | c.*2364C><br>T;<br>c.2174C>T                      | p.Thr725Me<br>t                                                         | 2  | FALSE | chr7:5524<br>1726:C:T  | 191:chr7:5<br>5241726:C<br>:T  | 0.001919 |
| 62_bl-2 | 62 | PIK3CA            | MODERATE           | c.1090G>A                                         | p.Gly364Arg                                                             | 3  | FALSE | chr3:1789<br>22321:G:A | 191:chr3:1<br>78922321:<br>G:A | 0.002257 |
| 62_bl-2 | 62 | FGFR1             | MODIFIER; MODERATE | c.-85G>T;<br>c.107G>T;<br>c.8G>T                  | p.Ser36Ile;<br>p.Ser3Ile                                                | 1  | FALSE | chr8:3831<br>4957:C:A  | 191:chr8:3<br>8314957:C<br>:A  | 0.003561 |
| 62_bl-2 | 62 | PIK3CA            | MODERATE           | c.1255C>A                                         | p.His419Asn                                                             | 1  | FALSE | chr3:1789<br>27977:C:A | 191:chr3:1<br>78927977:<br>C:A | 0.006316 |
| 62_bl-2 | 62 | TP53              | MODERATE; MODIFIER | c.170C>T;<br>c.287C>T;<br>c.-279C>T;<br>c.-360C>T | p.Ser57Phe;<br>p.Ser96Phe;                                              | 3  | FALSE | chr17:757<br>9400:G:A  | 191:chr17:<br>7579400:G<br>:A  | 0.002112 |
| 62_bl-2 | 62 | PIK3CA            | MODERATE           | c.1615C>A                                         | p.Pro539Thr                                                             | 3  | FALSE | chr3:1789<br>36073:C:A | 191:chr3:1<br>78936073:<br>C:A | 0.002296 |
| 62_bl-2 | 62 | TP53              | MODIFIER; MODERATE | c.-3G>T;<br>c.358G>T;<br>c.475G>T;<br>c.79G>T     | p.Ala120Ser;<br>p.Ala159Ser;<br>p.Ala27Ser                              | 23 | FALSE | chr17:757<br>8455:C:A  | 191:chr17:<br>7578455:C<br>:A  | 0.003735 |

|         |    |                             |                    |                                                                                                |                                                                         |     |       |                        |                                |          |
|---------|----|-----------------------------|--------------------|------------------------------------------------------------------------------------------------|-------------------------------------------------------------------------|-----|-------|------------------------|--------------------------------|----------|
| 62_bl-2 | 62 | MAP2K1                      | MODERATE           | c.316G>A                                                                                       | p.Ala106Thr                                                             | 1   | FALSE | chr15:667<br>29108:G:A | 191:chr15:<br>66729108:<br>G:A | 0.001635 |
| 62_bl-2 | 62 | MET                         | MODERATE           | c.608C>A                                                                                       | p.Ser203Tyr                                                             | 1   | FALSE | chr7:1163<br>39746:C:A | 191:chr7:1<br>16339746:<br>C:A | 0.002423 |
| 62_bl-2 | 62 | PTEN                        | MODERATE           | c.421C>A                                                                                       | p.His141Asn                                                             | 2   | FALSE | chr10:896<br>92937:C:A | 191:chr10:<br>89692937:<br>C:A | 0.003297 |
| 62_bl-2 | 62 | EPHA3                       | MODERATE           | c.1379C>A                                                                                      | p.Pro460His                                                             | 0   | FALSE | chr3:8944<br>5059:C:A  | 191:chr3:8<br>9445059:C<br>:A  | 0.001293 |
| 62_bl-2 | 62 | MET                         | MODERATE           | c.487T>C                                                                                       | p.Ser163Pro                                                             | 1   | FALSE | chr7:1163<br>39625:T:C | 191:chr7:1<br>16339625:<br>T:C | 0.002527 |
| 62_bl-2 | 62 | ERBB2;<br>MIEN1;<br>MIR4728 | MODERATE; MODIFIER | c.2818C>T;<br>c.2863C>T;<br>c.2908C>T;<br>n.3232C>T<br>;<br>c.*388G>A<br>; n.*67C>T            | p.Arg940Trp<br>;<br>p.Arg955Trp<br>;<br>p.Arg970Trp<br>;                | 2   | FALSE | chr17:378<br>82850:C:T | 191:chr17:<br>37882850:<br>C:T | 0.001232 |
| 62_bl-2 | 62 | ERBB2;<br>MIEN1;<br>MIR4728 | MODERATE; MODIFIER | c.3025G>A<br>;<br>c.3070G>A<br>;<br>c.3115G>A<br>;<br>n.3439G>A<br>;<br>c.*388C>T;<br>n.*67G>A | p.Ala1009Th<br>r;<br>p.Ala1024Th<br>r;<br>p.Ala1039Th<br>r;             | 2   | FALSE | chr17:378<br>83212:G:A | 191:chr17:<br>37883212:<br>G:A | 0.002326 |
| 62_bl-2 | 62 | MAP2K1                      | MODERATE           | c.198C>A                                                                                       | p.Asp66Glu                                                              | 4   | FALSE | chr15:667<br>27482:C:A | 191:chr15:<br>66727482:<br>C:A | 0.002972 |
| 62_bl-2 | 62 | ALK                         | MODERATE           | c.874C>T                                                                                       | p.Arg292Cys                                                             | 1   | FALSE | chr2:2991<br>7794:G:A  | 191:chr2:2<br>9917794:G<br>:A  | 0.001356 |
| 62_bl-2 | 62 | EPHA3                       | HIGH               | c.1515C>A                                                                                      | p.Tyr505*                                                               | 0   | FALSE | chr3:8944<br>8551:C:A  | 191:chr3:8<br>9448551:C<br>:A  | 0.001984 |
| 62_bl-2 | 62 | KIT                         | MODERATE           | c.1485C>A                                                                                      | p.Asn495Lys                                                             | 1   | FALSE | chr4:5559<br>2161:C:A  | 191:chr4:5<br>5592161:C<br>:A  | 0.002743 |
| 62_bl-2 | 62 | TP53                        | MODERATE           | c.367C>T;<br>c.448C>T;<br>c.727C>T;<br>c.844C>T                                                | p.Arg123Trp<br>;<br>p.Arg150Trp<br>;<br>p.Arg243Trp<br>;<br>p.Arg282Trp | 479 | FALSE | chr17:757<br>7094:G:A  | 191:chr17:<br>7577094:G<br>:A  | 0.001572 |

|         |    |                |                    |                                                                                                                            |                                                                |      |       |                             |                                 |          |
|---------|----|----------------|--------------------|----------------------------------------------------------------------------------------------------------------------------|----------------------------------------------------------------|------|-------|-----------------------------|---------------------------------|----------|
| 62_bl-2 | 62 | TP53           | MODERATE; HIGH     | c.363G>T;<br>c.480G>T;<br>c.84G>T;<br>c.3G>T                                                                               | p.Met121Ile<br>;<br>p.Met160Ile<br>;<br>p.Met28Ile;<br>p.Met1? | 4    | FALSE | chr17:757<br>8450:C:A       | 191:chr17:<br>7578450:C<br>:A   | 0.00188  |
| 62_bl-2 | 62 | PTEN           | MODERATE           | c.729C>A                                                                                                                   | p.Phe243Leu                                                    | 1    | FALSE | chr10:897<br>17704:C:A      | 191:chr10:<br>89717704:<br>C:A  | 0.00216  |
| 62_bl-2 | 62 | CSDE1;<br>NRAS | MODIFIER; MODERATE | c.*2430A><br>G;<br>c.*2523A><br>G;<br>c.*2817A><br>G;<br>c.*2910A><br>G;<br>c.*2964A><br>G;<br>c.*3057A><br>G;<br>c.182A>G | ; p.Gln61Arg                                                   | 1103 | FALSE | chr1:1152<br>56529:T:C      | 191:chr1:1<br>15256529:<br>T:C  | 0.472279 |
| 62_bl-2 | 62 | NF1            | MODERATE           | c.6405C>A<br>;<br>c.6468C>A                                                                                                | p.Phe2135Leu;<br>p.Phe2156Leu                                  | 1    | FALSE | chr17:296<br>64426:C:A      | 191:chr17:<br>29664426:<br>C:A  | 0.002304 |
| 62_bl-2 | 62 | DDR2           | MODERATE           | c.1598C>A                                                                                                                  | p.Thr533Lys                                                    | 1    | FALSE | chr1:1627<br>41907:C:A      | 191:chr1:1<br>62741907:<br>C:A  | 0.001311 |
| 62_bl-2 | 62 | PHLPP1         | MODERATE           | c.2303C>A                                                                                                                  | p.Ser768Tyr                                                    | 0    | FALSE | chr18:605<br>63103:C:A      | 191:chr18:<br>60563103:<br>C:A  | 0.003049 |
| 62_bl-2 | 62 | TP53           | MODERATE           | c.128G>T;<br>c.209G>T;<br>c.488G>T;<br>c.605G>T                                                                            | p.Arg43Leu;<br>p.Arg70Leu;<br>p.Arg163Leu<br>;<br>p.Arg202Leu  | 4    | FALSE | chr17:757<br>8244:C:A       | 191:chr17:<br>7578244:C<br>:A   | 0.0012   |
| 62_bl-2 | 62 | TP53           | MODERATE           | c.110G>T;<br>c.191G>T;<br>c.470G>T;<br>c.587G>T                                                                            | p.Arg37Leu;<br>p.Arg64Leu;<br>p.Arg157Leu<br>;<br>p.Arg196Leu  | 19   | FALSE | chr17:757<br>8262:C:A       | 191:chr17:<br>7578262:C<br>:A   | 0.001195 |
| 62_bl-2 | 62 | AKT1           | MODERATE           | c.286C>T                                                                                                                   | p.Arg96Trp                                                     | 1    | FALSE | chr14:105<br>242997:G:<br>A | 191:chr14:<br>10524299<br>7:G:A | 0.001741 |
| 62_bl-2 | 62 | BRAF           | MODERATE           | c.603G>T                                                                                                                   | p.Gln201His                                                    | 1    | FALSE | chr7:1405<br>08697:C:A      | 191:chr7:1<br>40508697:<br>C:A  | 0.002421 |
| 62_bl-2 | 62 | CTNNB1         | MODERATE           | c.125C>A                                                                                                                   | p.Thr42Lys                                                     | 0    | FALSE | chr3:4126<br>6128:C:A       | 191:chr3:4<br>1266128:C<br>:A   | 0.002674 |

|         |    |                 |                    |                                                                                       |                                                                       |   |       |                    |                        |          |
|---------|----|-----------------|--------------------|---------------------------------------------------------------------------------------|-----------------------------------------------------------------------|---|-------|--------------------|------------------------|----------|
| 62_bl-2 | 62 | ALK             | MODERATE           | c.3640C>T                                                                             | p.Arg1214Cys                                                          | 1 | FALSE | chr2:29443577:G:A  | 191:chr2:29443577:G:A  | 0.002789 |
| 62_bl-2 | 62 | AKT3            | MODERATE           | c.44G>T                                                                               | p.Arg15Met                                                            | 0 | FALSE | chr1:244006429:C:A | 191:chr1:244006429:C:A | 0.001566 |
| 62_bl-2 | 62 | PIK3CA          | MODERATE           | c.3180C>A                                                                             | p.His1060Gln                                                          | 2 | FALSE | chr3:178952125:C:A | 191:chr3:178952125:C:A | 0.001453 |
| 62_bl-2 | 62 | DDR2            | MODERATE           | c.313C>A                                                                              | p.Arg105Ser                                                           | 2 | FALSE | chr1:162724541:C:A | 191:chr1:162724541:C:A | 0.0027   |
| 62_bl-2 | 62 | TP53            | MODIFIER; MODERATE | c.*135A>G;<br>;<br>c.*47A>G;<br>c.1028A>G;<br>;<br>c.551A>G;<br>c.632A>G;<br>c.911A>G | p.Glu343Gly;<br>;<br>p.Glu184Gly;<br>;<br>p.Glu211Gly;<br>p.Glu304Gly | 1 | FALSE | chr17:7573999:T:C  | 191:chr17:7573999:T:C  | 0.001385 |
| 62_bl-2 | 62 | BRAF            | MODERATE           | c.914C>T                                                                              | p.Ala305Val                                                           | 2 | FALSE | chr7:140500228:G:A | 191:chr7:140500228:G:A | 0.001681 |
| 62_bl-2 | 62 | EPHA3           | HIGH               | c.318C>A                                                                              | p.Cys106*                                                             | 0 | FALSE | chr3:89259174:C:A  | 191:chr3:89259174:C:A  | 0.001412 |
| 62_bl-2 | 62 | CTNNB1          | MODERATE           | c.1564G>A                                                                             | p.Ala522Thr                                                           | 0 | FALSE | chr3:41275669:G:A  | 191:chr3:41275669:G:A  | 0.002457 |
| 62_bl-2 | 62 | EPHA3           | MODERATE           | c.2306G>A                                                                             | p.Arg769His                                                           | 0 | FALSE | chr3:89480469:G:A  | 191:chr3:89480469:G:A  | 0.000839 |
| 62_bl-2 | 62 | PTEN            | HIGH               | c.720C>A                                                                              | p.Tyr240*                                                             | 3 | FALSE | chr10:89717695:C:A | 191:chr10:89717695:C:A | 0.002024 |
| 62_bl-2 | 62 | CTNNB1          | MODERATE           | c.98C>A                                                                               | p.Ser33Tyr                                                            | 0 | FALSE | chr3:41266101:C:A  | 191:chr3:41266101:C:A  | 0.002793 |
| 62_bl-2 | 62 | TP53            | MODIFIER; HIGH     | c.*143G>T;<br>; c.*55G>T;<br>c.1036G>T;<br>;<br>c.559G>T;<br>c.640G>T;<br>c.919G>T    | p.Glu346*;<br>p.Glu187*;<br>p.Glu214*;<br>p.Glu307*                   | 4 | FALSE | chr17:7573991:C:A  | 191:chr17:7573991:C:A  | 0.001317 |
| 62_bl-2 | 62 | HRAS;<br>LRRC56 | MODERATE; MODIFIER | c.248C>T;<br>c.-506G>A                                                                | p.Ala83Val;                                                           | 1 | FALSE | chr11:533808:G:A   | 191:chr11:533808:G:A   | 0.001604 |
| 62_bl-2 | 62 | MET             | MODERATE           | c.142G>A                                                                              | p.Ala48Thr                                                            | 1 | FALSE | chr7:116339280:G:A | 191:chr7:116339280:G:A | 0.001453 |

|         |    |                             |                    |                                                                                               |                                                               |    |       |                        |                                |          |
|---------|----|-----------------------------|--------------------|-----------------------------------------------------------------------------------------------|---------------------------------------------------------------|----|-------|------------------------|--------------------------------|----------|
| 62_bl-2 | 62 | RET                         | MODERATE           | c.1991C>A                                                                                     | p.Ala664Asp                                                   | 2  | FALSE | chr10:436<br>10039:C:A | 191:chr10:<br>43610039:<br>C:A | 0.001168 |
| 62_bl-2 | 62 | PTEN                        | MODERATE           | c.392C>A                                                                                      | p.Thr131Asn                                                   | 2  | FALSE | chr10:896<br>92908:C:A | 191:chr10:<br>89692908:<br>C:A | 0.002882 |
| 62_bl-2 | 62 | ERBB2                       | MODERATE; MODIFIER | c.560G>A;<br>c.605G>A;<br>c.650G>A;<br>n.974G>A                                               | p.Arg187His<br>;<br>p.Arg202His<br>;<br>p.Arg217His<br>;      | 1  | FALSE | chr17:378<br>66345:G:A | 191:chr17:<br>37866345:<br>G:A | 0.001523 |
| 62_bl-2 | 62 | CTNNB1                      | MODERATE           | c.110C>A                                                                                      | p.Ser37Tyr                                                    | 0  | FALSE | chr3:4126<br>6113:C:A  | 191:chr3:4<br>1266113:C<br>:A  | 0.002774 |
| 62_bl-2 | 62 | TP53                        | MODERATE; MODIFIER | c.158C>T;<br>c.275C>T;<br>c.-279C>T;<br>c.-360C>T                                             | p.Pro53Leu;<br>p.Pro92Leu;                                    | 1  | FALSE | chr17:757<br>9412:G:A  | 191:chr17:<br>7579412:G<br>:A  | 0.002179 |
| 62_bl-2 | 62 | EGFR                        | MODERATE           | c.988G>A                                                                                      | p.Glu330Lys                                                   | 1  | FALSE | chr7:5522<br>3621:G:A  | 191:chr7:5<br>5223621:G<br>:A  | 0.001559 |
| 62_bl-2 | 62 | EGFR                        | MODIFIER; MODERATE | c.*2364G><br>A;<br>c.2125G>A                                                                  | p.Glu709Lys                                                   | 21 | FALSE | chr7:5524<br>1677:G:A  | 191:chr7:5<br>5241677:G<br>:A  | 0.001674 |
| 70_bl-2 | 70 | ROS1                        | MODERATE           | c.5412G>T                                                                                     | p.Lys1804Asn                                                  | 1  | FALSE | chr6:1176<br>47532:C:A | 192:chr6:1<br>17647532:<br>C:A | 0.001404 |
| 70_bl-2 | 70 | EPHA3                       | MODERATE           | c.237C>A                                                                                      | p.Asn79Lys                                                    | 0  | FALSE | chr3:8925<br>9093:C:A  | 192:chr3:8<br>9259093:C<br>:A  | 0.001021 |
| 70_bl-2 | 70 | ERBB2;<br>MIEN1;<br>MIR4728 | MODERATE; MODIFIER | c.2720A>G<br>;<br>c.2765A>G<br>;<br>c.2810A>G<br>;<br>n.3134A>G<br>;<br>c.*388T>C;<br>n.-1A>G | p.Lys907Arg<br>;<br>p.Lys922Arg<br>;<br>p.Lys937Arg<br>;      | 1  | FALSE | chr17:378<br>82044:A:G | 192:chr17:<br>37882044:<br>A:G | 0.000677 |
| 70_bl-2 | 70 | KIT                         | MODERATE           | c.148G>A                                                                                      | p.Val50Met                                                    | 4  | FALSE | chr4:5556<br>1758:G:A  | 192:chr4:5<br>5561758:G<br>:A  | 0.000868 |
| 70_bl-2 | 70 | TP53                        | MODERATE           | c.169G>T;<br>c.250G>T;<br>c.529G>T;<br>c.646G>T                                               | p.Val57Leu;<br>p.Val84Leu;<br>p.Val177Leu<br>;<br>p.Val216Leu | 72 | FALSE | chr17:757<br>8203:C:A  | 192:chr17:<br>7578203:C<br>:A  | 0.000868 |
| 70_bl-2 | 70 | RET                         | MODERATE           | c.2116G>A                                                                                     | p.Val706Met                                                   | 2  | FALSE | chr10:436<br>10164:G:A | 192:chr10:<br>43610164:<br>G:A | 0.000519 |

|         |    |                   |                    |                                                                                   |                                                                         |      |       |                        |                                |          |
|---------|----|-------------------|--------------------|-----------------------------------------------------------------------------------|-------------------------------------------------------------------------|------|-------|------------------------|--------------------------------|----------|
| 70_bl-2 | 70 | TP53              | MODIFIER; HIGH     | c.*143G>T;<br>; c.*55G>T;<br>c.1036G>T<br>;<br>c.559G>T;<br>c.640G>T;<br>c.919G>T | ; p.Glu346*;<br>p.Glu187*;<br>p.Glu214*;<br>p.Glu307*                   | 4    | FALSE | chr17:757<br>3991:C:A  | 192:chr17:<br>7573991:C<br>:A  | 0.000866 |
| 70_bl-2 | 70 | RET               | MODERATE           | c.1991C>A                                                                         | p.Ala664Asp                                                             | 2    | FALSE | chr10:436<br>10039:C:A | 192:chr10:<br>43610039:<br>C:A | 0.001088 |
| 70_bl-2 | 70 | TP53              | MODERATE           | c.337G>T;<br>c.418G>T;<br>c.697G>T;<br>c.814G>T                                   | p.Val113Leu<br>;<br>p.Val140Leu<br>;<br>p.Val233Leu<br>;<br>p.Val272Leu | 85   | FALSE | chr17:757<br>7124:C:A  | 192:chr17:<br>7577124:C<br>:A  | 0.001016 |
| 70_bl-2 | 70 | TP53              | MODERATE           | c.110G>T;<br>c.191G>T;<br>c.470G>T;<br>c.587G>T                                   | p.Arg37Leu;<br>p.Arg64Leu;<br>p.Arg157Leu<br>;<br>p.Arg196Leu           | 19   | FALSE | chr17:757<br>8262:C:A  | 192:chr17:<br>7578262:C<br>:A  | 0.000842 |
| 70_bl-2 | 70 | EPHA3             | HIGH               | c.318C>A                                                                          | p.Cys106*                                                               | 0    | FALSE | chr3:8925<br>9174:C:A  | 192:chr3:8<br>9259174:C<br>:A  | 0.002535 |
| 70_bl-2 | 70 | KRAS              | MODERATE           | c.34G>T                                                                           | p.Gly12Cys                                                              | 3755 | FALSE | chr12:253<br>98285:C:A | 192:chr12:<br>25398285:<br>C:A | 0.000881 |
| 70_bl-2 | 70 | ERBB2;<br>MIR4728 | MODERATE; MODIFIER | c.2020G>A<br>;<br>c.2065G>A<br>;<br>c.2110G>A<br>;<br>n.2434G>A<br>; n.-1G>A      | p.Gly674Arg<br>;<br>p.Gly689Arg<br>;<br>p.Gly704Arg                     | 1    | FALSE | chr17:378<br>79815:G:A | 192:chr17:<br>37879815:<br>G:A | 0.000864 |
| 70_bl-2 | 70 | CTNNB1            | MODERATE           | c.91C>A                                                                           | p.Leu31Met                                                              | 0    | FALSE | chr3:4126<br>6094:C:A  | 192:chr3:4<br>1266094:C<br>:A  | 0.001942 |
| 70_bl-2 | 70 | HRAS;<br>LRRC56   | MODERATE; MODIFIER | c.175G>A;<br>c.-506C>T                                                            | p.Ala59Thr;                                                             | 2    | FALSE | chr11:533<br>881:C:T   | 192:chr11:<br>533881:C:<br>T   | 0.000923 |
| 70_bl-2 | 70 | BRAF              | MODERATE           | c.929C>T                                                                          | p.Thr310Ile                                                             | 1    | FALSE | chr7:1405<br>00213:G:A | 192:chr7:1<br>40500213:<br>G:A | 0.000616 |
| 70_bl-2 | 70 | HGF               | HIGH               | c.1969G>T<br>;<br>c.1984G>T                                                       | p.Glu657*;<br>p.Glu662*                                                 | 0    | FALSE | chr7:8133<br>4732:C:A  | 192:chr7:8<br>1334732:C<br>:A  | 0.000975 |
| 70_bl-2 | 70 | CTNNB1            | MODERATE           | c.559G>A                                                                          | p.Ala187Thr                                                             | 0    | FALSE | chr3:4126<br>6888:G:A  | 192:chr3:4<br>1266888:G<br>:A  | 0.001448 |

|         |    |       |                    |                                                     |                                                            |    |       |                        |                                |          |
|---------|----|-------|--------------------|-----------------------------------------------------|------------------------------------------------------------|----|-------|------------------------|--------------------------------|----------|
| 70_bl-2 | 70 | ERBB2 | MODERATE; MODIFIER | c.1042C>T;<br>c.1087C>T;<br>c.1132C>T;<br>n.1456C>T | p.Pro348Ser<br>;<br>p.Pro363Ser<br>;<br>p.Pro378Ser<br>;   | 1  | FALSE | chr17:378<br>68685:C:T | 192:chr17:<br>37868685:<br>C:T | 0.000598 |
| 70_bl-2 | 70 | NF1   | MODERATE           | c.6405C>A<br>;<br>c.6468C>A                         | p.Phe2135L<br>eu;<br>p.Phe2156L<br>eu                      | 1  | FALSE | chr17:296<br>64426:C:A | 192:chr17:<br>29664426:<br>C:A | 0.001718 |
| 70_bl-2 | 70 | TP53  | MODIFIER; MODERATE | c.-13G>T;<br>c.105G>T;<br>c.-279G>T;<br>c.-360G>T   | p.Leu35Phe                                                 | 2  | FALSE | chr17:757<br>9582:C:A  | 192:chr17:<br>7579582:C<br>:A  | 0.002113 |
| 70_bl-2 | 70 | DDR2  | MODERATE           | c.1234C>A                                           | p.Leu412Ile                                                | 1  | FALSE | chr1:1627<br>37090:C:A | 192:chr1:1<br>62737090:<br>C:A | 0.001336 |
| 70_bl-2 | 70 | TP53  | MODERATE           | c.248G>T;<br>c.329G>T;<br>c.608G>T;<br>c.725G>T     | p.Cys83Phe;<br>p.Cys110Phe;<br>p.Cys203Phe;<br>p.Cys242Phe | 72 | FALSE | chr17:757<br>7556:C:A  | 192:chr17:<br>7577556:C<br>:A  | 0.001078 |
| 70_bl-2 | 70 | DDR2  | MODERATE           | c.2255G>A                                           | p.Arg752His                                                | 1  | FALSE | chr1:1627<br>46132:G:A | 192:chr1:1<br>62746132:<br>G:A | 0.000895 |
| 70_bl-2 | 70 | NF1   | HIGH               | c.6792C>A<br>;<br>c.6855C>A                         | p.Tyr2264*;<br>p.Tyr2285*                                  | 2  | FALSE | chr17:296<br>65757:C:A | 192:chr17:<br>29665757:<br>C:A | 0.000955 |
| 70_bl-2 | 70 | EGFR  | MODERATE           | c.1159C>G                                           | p.Leu387Val                                                | 1  | FALSE | chr7:5522<br>4477:C:G  | 192:chr7:5<br>5224477:C<br>:G  | 0.001103 |
| 70_bl-2 | 70 | NF1   | MODERATE           | c.3559C>A                                           | p.Leu1187Ile                                               | 1  | FALSE | chr17:295<br>60082:C:A | 192:chr17:<br>29560082:<br>C:A | 0.000842 |
| 70_bl-2 | 70 | TP53  | MODERATE; MODIFIER | c.100G>T;<br>c.217G>T;<br>c.-279G>T;<br>c.-360G>T   | p.Val34Leu;<br>p.Val73Leu;                                 | 5  | FALSE | chr17:757<br>9470:C:A  | 192:chr17:<br>7579470:C<br>:A  | 0.00132  |
| 70_bl-2 | 70 | RET   | MODERATE           | c.1867G>A                                           | p.Glu623Lys                                                | 1  | FALSE | chr10:436<br>09111:G:A | 192:chr10:<br>43609111:<br>G:A | 0.000817 |

|         |    |                            |                    |                                                                                                                      |                                                               |   |       |                        |                                |          |
|---------|----|----------------------------|--------------------|----------------------------------------------------------------------------------------------------------------------|---------------------------------------------------------------|---|-------|------------------------|--------------------------------|----------|
| 70_bl-2 | 70 | GAPDH;<br>IFFO1;<br>NCPAD2 | MODERATE; MODIFIER | c.148G>A;<br>c.274G>A;<br>c.*1743C><br>T;<br>c.*1746C><br>T;<br>c.*1770C><br>T;<br>n.*2798C><br>T;<br>c.*4252G><br>A | p.Ala50Thr;<br>p.Ala92Thr;                                    | 0 | FALSE | chr12:664<br>6123:G:A  | 192:chr12:<br>6646123:G<br>:A  | 0.00079  |
| 70_bl-2 | 70 | PIK3CA                     | MODERATE           | c.35G>A                                                                                                              | p.Gly12Asp                                                    | 5 | FALSE | chr3:1789<br>16648:G:A | 192:chr3:1<br>78916648:<br>G:A | 0.000562 |
| 70_bl-2 | 70 | DDR2                       | MODERATE           | c.1598C>A                                                                                                            | p.Thr533Lys                                                   | 1 | FALSE | chr1:1627<br>41907:C:A | 192:chr1:1<br>62741907:<br>C:A | 0.001661 |
| 70_bl-2 | 70 | PTEN                       | HIGH               | c.633C>A                                                                                                             | p.Cys211*                                                     | 2 | FALSE | chr10:897<br>12015:C:A | 192:chr10:<br>89712015:<br>C:A | 0.002747 |
| 70_bl-2 | 70 | GAPDH;<br>IFFO1            | MODERATE; MODIFIER | c.217G>A;<br>c.343G>A;<br>c.*1743C><br>T;<br>c.*1746C><br>T;<br>c.*1770C><br>T;<br>n.*2798C><br>T                    | p.Gly73Arg;<br>p.Gly115Arg<br>;                               | 0 | FALSE | chr12:664<br>6282:G:A  | 192:chr12:<br>6646282:G<br>:A  | 0.000805 |
| 70_bl-2 | 70 | TP53                       | MODERATE           | c.175G>T;<br>c.256G>T;<br>c.535G>T;<br>c.652G>T                                                                      | p.Val59Leu;<br>p.Val86Leu;<br>p.Val179Leu<br>;<br>p.Val218Leu | 7 | FALSE | chr17:757<br>8197:C:A  | 192:chr17:<br>7578197:C<br>:A  | 0.000861 |
| 70_bl-2 | 70 | ALK                        | HIGH               | c.1120G>T                                                                                                            | p.Glu374*                                                     | 1 | FALSE | chr2:2975<br>4815:C:A  | 192:chr2:2<br>9754815:C<br>:A  | 0.001036 |
| 70_bl-2 | 70 | TP53                       | MODERATE; MODIFIER | c.175G>T;<br>c.58G>T; c.-<br>279G>T; c.-<br>360G>T                                                                   | p.Gly59Cys;<br>p.Gly20Cys;                                    | 3 | FALSE | chr17:757<br>9512:C:A  | 192:chr17:<br>7579512:C<br>:A  | 0.001416 |
| 70_bl-2 | 70 | BRAF                       | MODERATE           | c.914C>T                                                                                                             | p.Ala305Val                                                   | 2 | FALSE | chr7:1405<br>00228:G:A | 192:chr7:1<br>40500228:<br>G:A | 0.000799 |



|         |    |                    |                    |                                                                                                                            |                                                                         |     |       |                        |                                |          |
|---------|----|--------------------|--------------------|----------------------------------------------------------------------------------------------------------------------------|-------------------------------------------------------------------------|-----|-------|------------------------|--------------------------------|----------|
| 70_bl-2 | 70 | TP53               | MODERATE           | c.367C>T;<br>c.448C>T;<br>c.727C>T;<br>c.844C>T                                                                            | p.Arg123Trp<br>;<br>p.Arg150Trp<br>;<br>p.Arg243Trp<br>;<br>p.Arg282Trp | 479 | FALSE | chr17:757<br>7094:G:A  | 192:chr17:<br>7577094:G<br>:A  | 0.000995 |
| 70_bl-2 | 70 | PTEN               | MODERATE           | c.389G>A                                                                                                                   | p.Arg130Gln                                                             | 89  | FALSE | chr10:896<br>92905:G:A | 192:chr10:<br>89692905:<br>G:A | 0.00157  |
| 70_bl-2 | 70 | CTNNB1             | MODERATE           | c.125C>A                                                                                                                   | p.Thr42Lys                                                              | 0   | FALSE | chr3:4126<br>6128:C:A  | 192:chr3:4<br>1266128:C<br>:A  | 0.00129  |
| 70_bl-2 | 70 | CSDE1;<br>NRAS     | MODIFIER; HIGH     | c.*2430G><br>T;<br>c.*2523G><br>T;<br>c.*2817G><br>T;<br>c.*2910G><br>T;<br>c.*2964G><br>T;<br>c.*3057G><br>T;<br>c.187G>T | ; p.Glu63*                                                              | 1   | FALSE | chr1:1152<br>56524:C:A | 192:chr1:1<br>15256524:<br>C:A | 0.001061 |
| 70_bl-2 | 70 | BRAF               | MODERATE           | c.2285C>T                                                                                                                  | p.Ala762Val                                                             | 2   | FALSE | chr7:1404<br>34413:G:A | 192:chr7:1<br>40434413:<br>G:A | 0.000507 |
| 70_bl-2 | 70 | MET                | MODERATE           | c.4023C>A<br>;<br>c.4077C>A                                                                                                | p.Phe1341L<br>eu;<br>p.Phe1359L<br>eu                                   | 1   | FALSE | chr7:1164<br>36028:C:A | 192:chr7:1<br>16436028:<br>C:A | 0.000516 |
| 70_bl-2 | 70 | NF1                | HIGH               | c.5294C>A<br>;<br>c.5357C>A                                                                                                | p.Ser1765*;<br>p.Ser1786*                                               | 1   | FALSE | chr17:296<br>54605:C:A | 192:chr17:<br>29654605:<br>C:A | 0.00105  |
| 70_bl-2 | 70 | MAP2K1             | MODERATE           | c.146G>A                                                                                                                   | p.Arg49His                                                              | 1   | FALSE | chr15:667<br>27430:G:A | 192:chr15:<br>66727430:<br>G:A | 0.000702 |
| 70_bl-2 | 70 | FGFR3              | MODERATE           | c.1409G>T<br>;<br>c.1745G>T<br>;<br>c.1751G>T                                                                              | p.Cys470Ph<br>e;<br>p.Cys582Ph<br>e;<br>p.Cys584Ph<br>e                 | 1   | FALSE | chr4:1807<br>576:G:T   | 192:chr4:1<br>807576:G:<br>T   | 0.003215 |
| 70_bl-2 | 70 | CTNNB1             | MODERATE           | c.1972G>T                                                                                                                  | p.Val658Phe                                                             | 0   | FALSE | chr3:4127<br>8096:G:T  | 192:chr3:4<br>1278096:G<br>:T  | 0.001159 |
| 70_bl-2 | 70 | HOXD-AS2;<br>HOXD8 | MODIFIER; MODERATE | n.*692C>T<br>;<br>c.-123-<br>30G>A;<br>c.400G>A                                                                            | ; p.Ala134Thr                                                           | 0   | FALSE | chr2:1769<br>95494:G:A | 192:chr2:1<br>76995494:<br>G:A | 0.001009 |

|         |    |                    |                    |                                                      |                                                          |    |       |                        |                                |          |
|---------|----|--------------------|--------------------|------------------------------------------------------|----------------------------------------------------------|----|-------|------------------------|--------------------------------|----------|
| 70_bl-2 | 70 | TP53               | MODERATE           | c.364G>T;<br>c.481G>T;<br>c.4G>T;<br>c.85G>T         | p.Ala122Ser;<br>p.Ala161Ser;<br>p.Ala2Ser;<br>p.Ala29Ser | 53 | FALSE | chr17:757<br>8449:C:A  | 192:chr17:<br>7578449:C<br>:A  | 0.001182 |
| 70_bl-2 | 70 | MET                | HIGH               | c.1619G>A                                            | p.Trp540*                                                | 1  | FALSE | chr7:1163<br>80997:G:A | 192:chr7:1<br>16380997:<br>G:A | 0.000537 |
| 70_bl-2 | 70 | PTEN               | MODERATE           | c.295G>A                                             | p.Glu99Lys                                               | 3  | FALSE | chr10:896<br>92811:G:A | 192:chr10:<br>89692811:<br>G:A | 0.001243 |
| 70_bl-2 | 70 | MAP2K1             | MODERATE           | c.198C>A                                             | p.Asp66Glu                                               | 4  | FALSE | chr15:667<br>27482:C:A | 192:chr15:<br>66727482:<br>C:A | 0.00176  |
| 70_bl-2 | 70 | TP53               | MODIFIER; MODERATE | c.-56G>T;<br>c.26G>T;<br>c.305G>T;<br>c.422G>T       | ; p.Cys9Phe;<br>p.Cys102Ph<br>e;<br>p.Cys141Ph<br>e      | 81 | FALSE | chr17:757<br>8508:C:A  | 192:chr17:<br>7578508:C<br>:A  | 0.001861 |
| 70_bl-2 | 70 | BRAF               | MODERATE           | c.2223G>T                                            | p.Glu741As<br>p                                          | 1  | FALSE | chr7:1404<br>34475:C:A | 192:chr7:1<br>40434475:<br>C:A | 0.000645 |
| 70_bl-2 | 70 | HOXD-AS2;<br>HOXD8 | MODIFIER; MODERATE | n.*692G>T<br>;<br>c.105C>A;<br>c.654C>A;<br>c.657C>A | ; p.Asn35Lys;<br>p.Asn218Lys<br>;<br>p.Asn219Lys         | 0  | FALSE | chr2:1769<br>96124:C:A | 192:chr2:1<br>76996124:<br>C:A | 0.001092 |
| 70_bl-2 | 70 | MET                | MODERATE           | c.608C>A                                             | p.Ser203Tyr                                              | 1  | FALSE | chr7:1163<br>39746:C:A | 192:chr7:1<br>16339746:<br>C:A | 0.001143 |
| 70_bl-2 | 70 | PTEN               | MODERATE           | c.518G>A                                             | p.Arg173His                                              | 27 | FALSE | chr10:897<br>11900:G:A | 192:chr10:<br>89711900:<br>G:A | 0.001302 |
| 70_bl-2 | 70 | CTNNB1             | MODERATE           | c.131C>A                                             | p.Pro44His                                               | 0  | FALSE | chr3:4126<br>6134:C:A  | 192:chr3:4<br>1266134:C<br>:A  | 0.001947 |
| 70_bl-2 | 70 | EGFR               | MODIFIER; MODERATE | c.*2133C><br>T;<br>c.*2364C><br>T;<br>c.2011C>T      | ; p.Arg671Cys                                            | 2  | FALSE | chr7:5524<br>0767:C:T  | 192:chr7:5<br>5240767:C<br>:T  | 0.001207 |
| 70_bl-2 | 70 | KRAS               | HIGH               | c.292G>T                                             | p.Glu98*                                                 | 1  | FALSE | chr12:253<br>78706:C:A | 192:chr12:<br>25378706:<br>C:A | 0.001059 |
| 70_bl-2 | 70 | HOXD-AS2;<br>HOXD8 | MODIFIER; MODERATE | n.*692G>T<br>;<br>c.22C>A;<br>c.574C>A               | ; p.Gln8Lys;<br>p.Gln192Lys                              | 0  | FALSE | chr2:1769<br>95668:C:A | 192:chr2:1<br>76995668:<br>C:A | 0.001187 |

|         |    |                             |                    |                                                                               |                                                             |    |       |                    |                        |          |
|---------|----|-----------------------------|--------------------|-------------------------------------------------------------------------------|-------------------------------------------------------------|----|-------|--------------------|------------------------|----------|
| 70_bl-2 | 70 | MITF                        | MODIFIER; MODERATE | c.-53+197C>A;<br>c.104+24188C>A;<br>c.48C>A                                   | p.Phe16Leu                                                  | 0  | FALSE | chr3:69813040:C:A  | 192:chr3:69813040:C:A  | 0.001145 |
| 70_bl-2 | 70 | TP53                        | HIGH               | c.133G>T;<br>c.214G>T;<br>c.493G>T;<br>c.610G>T                               | p.Glu45*;<br>p.Glu72*;<br>p.Glu165*;<br>p.Glu204*           | 35 | FALSE | chr17:7578239:C:A  | 192:chr17:7578239:C:A  | 0.000867 |
| 70_bl-2 | 70 | EGFR;<br>EGFR-AS1           | MODERATE; MODIFIER | c.2576C>A;<br>n.-1G>T                                                         | p.Ala859Asp                                                 | 1  | FALSE | chr7:55259518:C:A  | 192:chr7:55259518:C:A  | 0.001285 |
| 70_bl-2 | 70 | PIK3CA                      | MODERATE           | c.3180C>A                                                                     | p.His1060Gln                                                | 2  | FALSE | chr3:178952125:C:A | 192:chr3:178952125:C:A | 0.001137 |
| 70_bl-2 | 70 | DDR2                        | MODERATE           | c.2021C>A                                                                     | p.Ser674Tyr                                                 | 1  | FALSE | chr1:162745606:C:A | 192:chr1:162745606:C:A | 0.000602 |
| 70_bl-2 | 70 | BRAF                        | HIGH               | c.1378G>T                                                                     | p.Gly460*                                                   | 1  | FALSE | chr7:140481430:C:A | 192:chr7:140481430:C:A | 0.00071  |
| 70_bl-2 | 70 | PTEN                        | MODERATE           | c.1007A>T                                                                     | p.Tyr336Phe                                                 | 1  | FALSE | chr10:89720856:A:T | 192:chr10:89720856:A:T | 0.004243 |
| 70_bl-2 | 70 | EGFR                        | MODIFIER; MODERATE | c.*2364T>A;<br>c.2135T>A                                                      | p.Phe712Tyr                                                 | 2  | FALSE | chr7:55241687:T:A  | 192:chr7:55241687:T:A  | 0.000804 |
| 70_bl-2 | 70 | ERBB2;<br>MIEN1;<br>MIR4728 | MODERATE; MODIFIER | c.2261G>A;<br>c.2306G>A;<br>c.2351G>A;<br>n.2675G>A;<br>c.*388C>T;<br>n.-1G>A | p.Arg754His;<br>p.Arg769His;<br>p.Arg784His                 | 1  | FALSE | chr17:37881022:G:A | 192:chr17:37881022:G:A | 0.000505 |
| 70_bl-2 | 70 | TP53                        | MODERATE           | c.364G>T;<br>c.445G>T;<br>c.724G>T;<br>c.841G>T                               | p.Asp122Tyr;<br>p.Asp149Tyr;<br>p.Asp242Tyr;<br>p.Asp281Tyr | 28 | FALSE | chr17:7577097:C:A  | 192:chr17:7577097:C:A  | 0.001007 |
| 70_bl-2 | 70 | CTNNB1                      | MODERATE           | c.884C>A                                                                      | p.Ala295Asp                                                 | 0  | FALSE | chr3:41267300:C:A  | 192:chr3:41267300:C:A  | 0.001616 |
| 70_bl-2 | 70 | ALK                         | MODERATE           | c.2586G>T                                                                     | p.Glu862Asp                                                 | 1  | FALSE | chr2:29455216:C:A  | 192:chr2:29455216:C:A  | 0.000875 |
| 70_bl-2 | 70 | DDR2                        | MODERATE           | c.313C>A                                                                      | p.Arg105Ser                                                 | 2  | FALSE | chr1:162724541:C:A | 192:chr1:162724541:C:A | 0.00127  |

|         |    |       |                            |                                                                                     |                                                                         |    |       |                        |                                |          |
|---------|----|-------|----------------------------|-------------------------------------------------------------------------------------|-------------------------------------------------------------------------|----|-------|------------------------|--------------------------------|----------|
| 70_bl-2 | 70 | KIT   | MODERATE                   | c.1156G>A                                                                           | p.Glu386Lys                                                             | 1  | FALSE | chr4:5557<br>5630:G:A  | 192:chr4:5<br>5575630:G<br>:A  | 0.001063 |
| 70_bl-2 | 70 | HGF   | MODERATE                   | c.1678C>T;<br>c.1693C>T                                                             | p.Leu560Phe;<br>p.Leu565Phe                                             | 0  | FALSE | chr7:8133<br>5667:G:A  | 192:chr7:8<br>1335667:G<br>:A  | 0.000818 |
| 70_bl-2 | 70 | ERBB2 | MODERATE; MODIFIER         | c.1191C>A<br>;<br>c.1236C>A<br>;<br>c.1281C>A<br>;<br>n.1605C>A                     | p.Asn397Lys<br>;<br>p.Asn412Lys<br>;<br>p.Asn427Lys<br>;                | 1  | FALSE | chr17:378<br>71757:C:A | 192:chr17:<br>37871757:<br>C:A | 0.002293 |
| 70_bl-2 | 70 | MET   | HIGH                       | c.2387C>A<br>;<br>c.2441C>A                                                         | p.Ser796*;<br>p.Ser814*                                                 | 1  | FALSE | chr7:1164<br>03126:C:A | 192:chr7:1<br>16403126:<br>C:A | 0.001088 |
| 70_bl-2 | 70 | TP53  | MODIFIER; MODERATE         | c.*117G>T<br>;<br>c.*29G>T;<br>c.1010G>T<br>;<br>c.533G>T;<br>c.614G>T;<br>c.893G>T | p.Arg337Leu<br>;<br>p.Arg178Leu<br>;<br>p.Arg205Leu<br>;<br>p.Arg298Leu | 21 | FALSE | chr17:757<br>4017:C:A  | 192:chr17:<br>7574017:C<br>:A  | 0.815146 |
| 70_bl-2 | 70 | TP53  | MODIFIER; MODERATE         | c.-61G>T;<br>c.21G>T;<br>c.300G>T;<br>c.417G>T                                      | p.Lys7Asn;<br>p.Lys100Asn<br>;<br>p.Lys139Asn                           | 7  | FALSE | chr17:757<br>8513:C:A  | 192:chr17:<br>7578513:C<br>:A  | 0.001266 |
| 70_bl-2 | 70 | MET   | MODERATE                   | c.783C>A                                                                            | p.Phe261Leu                                                             | 2  | FALSE | chr7:1163<br>39921:C:A | 192:chr7:1<br>16339921:<br>C:A | 0.000778 |
| 70_bl-2 | 70 | FGFR1 | MODIFIER; MODERATE         | c.-34C>T;<br>c.158C>T;<br>c.59C>T                                                   | p.Thr53Ile;<br>p.Thr20Ile                                               | 1  | FALSE | chr8:3831<br>4906:G:A  | 192:chr8:3<br>8314906:G<br>:A  | 0.001131 |
| 70_bl-2 | 70 | TP53  | LOW; MODIFIER;<br>MODERATE | c.-6C>T;<br>c.355C>T;<br>c.472C>T;<br>c.76C>T                                       | p.Arg119Cys<br>;<br>p.Arg158Cys<br>;<br>p.Arg26Cys                      | 17 | FALSE | chr17:757<br>8458:G:A  | 192:chr17:<br>7578458:G<br>:A  | 0.001196 |
| 70_bl-2 | 70 | PTEN  | MODERATE                   | c.421C>A                                                                            | p.His141Asn                                                             | 2  | FALSE | chr10:896<br>92937:C:A | 192:chr10:<br>89692937:<br>C:A | 0.002394 |

|         |    |                             |                    |                                                                                                |                                                               |     |       |                        |                                |          |
|---------|----|-----------------------------|--------------------|------------------------------------------------------------------------------------------------|---------------------------------------------------------------|-----|-------|------------------------|--------------------------------|----------|
| 70_bl-2 | 70 | ERBB2;<br>MIEN1;<br>MIR4728 | MODERATE; MODIFIER | c.3025G>A<br>;<br>c.3070G>A<br>;<br>c.3115G>A<br>;<br>n.3439G>A<br>;<br>c.*388C>T;<br>n.*67G>A | p.Ala1009Thr;<br>p.Ala1024Thr;<br>p.Ala1039Thr;               | 2   | FALSE | chr17:378<br>83212:G:A | 192:chr17:<br>37883212:<br>G:A | 0.000839 |
| 70_bl-2 | 70 | TP53                        | MODERATE           | c.116A>G;<br>c.35A>G;<br>c.395A>G;<br>c.512A>G                                                 | p.Glu39Gly;<br>p.Glu12Gly;<br>p.Glu132Gly<br>;<br>p.Glu171Gly | 3   | FALSE | chr17:757<br>8418:T:C  | 192:chr17:<br>7578418:T<br>:C  | 0.00103  |
| 70_bl-2 | 70 | DDR2                        | MODERATE           | c.700G>A                                                                                       | p.Asp234Asn                                                   | 1   | FALSE | chr1:1627<br>29614:G:A | 192:chr1:1<br>62729614:<br>G:A | 0.000794 |
| 70_bl-2 | 70 | HGF                         | MODERATE           | c.434G>T                                                                                       | p.Ser145Ile                                                   | 0   | FALSE | chr7:8138<br>6553:C:A  | 192:chr7:8<br>1386553:C<br>:A  | 0.000775 |
| 70_bl-2 | 70 | PIK3CA                      | MODERATE           | c.1255C>A                                                                                      | p.His419Asn                                                   | 1   | FALSE | chr3:1789<br>27977:C:A | 192:chr3:1<br>78927977:<br>C:A | 0.001917 |
| 70_bl-2 | 70 | EGFR                        | MODERATE           | c.2764G>A                                                                                      | p.Glu922Lys                                                   | 1   | FALSE | chr7:5526<br>6472:G:A  | 192:chr7:5<br>5266472:G<br>:A  | 0.000539 |
| 70_bl-2 | 70 | TP53                        | MODIFIER; MODERATE | c.-9G>T;<br>c.352G>T;<br>c.469G>T;<br>c.73G>T                                                  | p.Val118Phe<br>;<br>p.Val157Phe<br>; p.Val25Phe               | 169 | FALSE | chr17:757<br>8461:C:A  | 192:chr17:<br>7578461:C<br>:A  | 0.001784 |
| 70_bl-2 | 70 | ALK                         | MODERATE           | c.4411G>A                                                                                      | p.Val1471Met                                                  | 1   | FALSE | chr2:2941<br>6542:C:T  | 192:chr2:2<br>9416542:C<br>:T  | 0.000683 |
| 70_bl-2 | 70 | TP53                        | MODIFIER; MODERATE | c.-3G>T;<br>c.358G>T;<br>c.475G>T;<br>c.79G>T                                                  | p.Alc120Ser;<br>p.Alc159Ser;<br>p.Alc27Ser                    | 23  | FALSE | chr17:757<br>8455:C:A  | 192:chr17:<br>7578455:C<br>:A  | 0.001161 |
| 70_bl-2 | 70 | EGFR;<br>EGFR-AS1           | MODERATE; MODIFIER | c.2527G>A<br>; n.-1C>T                                                                         | p.Val843Ile;                                                  | 6   | FALSE | chr7:5525<br>9469:G:A  | 192:chr7:5<br>5259469:G<br>:A  | 0.000871 |
| 70_bl-2 | 70 | EGFR                        | MODERATE           | c.755G>A                                                                                       | p.Arg252His                                                   | 3   | FALSE | chr7:5522<br>1711:G:A  | 192:chr7:5<br>5221711:G<br>:A  | 0.001704 |

|         |    |                   |                    |                                                                                                   |                                                                         |     |       |                        |                                |          |
|---------|----|-------------------|--------------------|---------------------------------------------------------------------------------------------------|-------------------------------------------------------------------------|-----|-------|------------------------|--------------------------------|----------|
| 70_bl-2 | 70 | TP53              | MODIFIER; MODERATE | c.*137A>G<br>;<br>c.*225A>G<br>;<br>c.1001A>G<br>;<br>c.1118A>G<br>;<br>c.641A>G<br>;<br>c.722A>G | p.Lys334Arg<br>;<br>p.Lys373Arg<br>;<br>p.Lys214Arg<br>;<br>p.Lys241Arg | 1   | FALSE | chr17:757<br>2991:T:C  | 192:chr17:<br>7572991:T<br>:C  | 0.004244 |
| 70_bl-2 | 70 | CTNNB1            | MODERATE           | c.122C>A                                                                                          | p.Thr41Asn                                                              | 0   | FALSE | chr3:4126<br>6125:C:A  | 192:chr3:4<br>1266125:C<br>:A  | 0.00262  |
| 70_bl-2 | 70 | PIK3CA            | MODERATE           | c.1636C>A                                                                                         | p.Gln546Lys                                                             | 127 | FALSE | chr3:1789<br>36094:C:A | 192:chr3:1<br>78936094:<br>C:A | 0.000687 |
| 70_bl-2 | 70 | PTEN              | MODERATE           | c.443C>A                                                                                          | p.Ala148Glu                                                             | 1   | FALSE | chr10:896<br>92959:C:A | 192:chr10:<br>89692959:<br>C:A | 0.002554 |
| 70_bl-2 | 70 | BRAF              | MODERATE           | c.1827G>T                                                                                         | p.Gln609His                                                             | 1   | FALSE | chr7:1404<br>53108:C:A | 192:chr7:1<br>40453108:<br>C:A | 0.000524 |
| 70_bl-2 | 70 | ERBB2             | MODERATE; MODIFIER | c.839C>A;<br>c.884C>A;<br>c.929C>A;<br>n.1253C>A                                                  | p.Ser280Tyr;<br>p.Ser295Tyr;<br>p.Ser310Tyr;                            | 28  | FALSE | chr17:378<br>68208:C:A | 192:chr17:<br>37868208:<br>C:A | 0.000599 |
| 70_bl-2 | 70 | RET               | MODERATE           | c.1690A>C                                                                                         | p.Thr564Pro                                                             | 1   | FALSE | chr10:436<br>08342:A:C | 192:chr10:<br>43608342:<br>A:C | 0.00399  |
| 70_bl-2 | 70 | MET               | MODERATE           | c.487T>C                                                                                          | p.Ser163Pro                                                             | 1   | FALSE | chr7:1163<br>39625:T:C | 192:chr7:1<br>16339625:<br>T:C | 0.000721 |
| 70_bl-2 | 70 | EGFR;<br>EGFR-AS1 | MODERATE; MODIFIER | c.2507G>A<br>; n.-1C>T                                                                            | p.Arg836His<br>;                                                        | 2   | FALSE | chr7:5525<br>9449:G:A  | 192:chr7:5<br>5259449:G<br>:A  | 0.000935 |
| 70_bl-2 | 70 | NF1               | MODERATE           | c.8070G>T<br>;<br>c.8133G>T                                                                       | p.Leu2690P<br>he;<br>p.Leu2711P<br>he                                   | 1   | FALSE | chr17:296<br>86006:G:T | 192:chr17:<br>29686006:<br>G:T | 0.021116 |
| 70_bl-2 | 70 | ALK               | MODERATE           | c.1753G>A                                                                                         | p.Ala585Thr                                                             | 3   | FALSE | chr2:2951<br>9818:C:T  | 192:chr2:2<br>9519818:C<br>:T  | 0.001178 |
| 70_bl-2 | 70 | EPHA3             | MODERATE           | c.1169C>A                                                                                         | p.Thr390Asn                                                             | 0   | FALSE | chr3:8939<br>1103:C:A  | 192:chr3:8<br>9391103:C<br>:A  | 0.001041 |
| 70_bl-2 | 70 | RET               | MODERATE           | c.1783G>A                                                                                         | p.Glu595Lys                                                             | 1   | FALSE | chr10:436<br>09027:G:A | 192:chr10:<br>43609027:<br>G:A | 0.000928 |
| 70_bl-2 | 70 | DDR2              | MODERATE           | c.397C>T                                                                                          | p.Arg133Trp                                                             | 1   | FALSE | chr1:1627<br>24625:C:T | 192:chr1:1<br>62724625:<br>C:T | 0.001328 |
| 70_bl-2 | 70 | EGFR              | MODERATE           | c.2763C>A                                                                                         | p.Ser921Arg                                                             | 3   | FALSE | chr7:5526<br>6471:C:A  | 192:chr7:5<br>5266471:C<br>:A  | 0.000539 |

|         |    |                           |                    |                                    |                                           |   |       |                    |                        |          |
|---------|----|---------------------------|--------------------|------------------------------------|-------------------------------------------|---|-------|--------------------|------------------------|----------|
| 70_bl-2 | 70 | EGFR                      | MODIFIER; MODERATE | c.*2364C>T;<br>c.2165C>T           | p.Ala722Val                               | 2 | FALSE | chr7:55241717:C:T  | 192:chr7:55241717:C:T  | 0.000808 |
| 70_bl-2 | 70 | EGFR;<br>EGFR-AS1         | MODERATE; MODIFIER | c.2354C>A;<br>n.1208G>T            | p.Thr785Asn                               | 2 | FALSE | chr7:55249056:C:A  | 192:chr7:55249056:C:A  | 0.000637 |
| 70_bl-2 | 70 | HGF                       | MODERATE           | c.251G>T                           | p.Cys84Phe                                | 0 | FALSE | chr7:81392026:C:A  | 192:chr7:81392026:C:A  | 0.001467 |
| 70_bl-2 | 70 | NF1                       | HIGH               | c.6932C>A;<br>c.6995C>A            | p.Ser2311*;<br>p.Ser2332*                 | 2 | FALSE | chr17:29667596:C:A | 192:chr17:29667596:C:A | 0.001254 |
| 70_bl-2 | 70 | NF1                       | MODERATE           | c.2695T>G                          | p.Leu899Val                               | 3 | FALSE | chr17:29556328:T:G | 192:chr17:29556328:T:G | 0.002274 |
| 70_bl-2 | 70 | EGFR                      | MODERATE           | c.445C>T                           | p.Arg149Trp                               | 1 | FALSE | chr7:55214319:C:T  | 192:chr7:55214319:C:T  | 0.002119 |
| 70_bl-2 | 70 | CTNNB1                    | MODERATE           | c.86C>A                            | p.Ser29Tyr                                | 0 | FALSE | chr3:41266089:C:A  | 192:chr3:41266089:C:A  | 0.001314 |
| 70_bl-2 | 70 | ALK                       | MODERATE           | c.4192C>T                          | p.Pro1398Ser                              | 1 | FALSE | chr2:29416761:G:A  | 192:chr2:29416761:G:A  | 0.001071 |
| 70_bl-2 | 70 | CTNNB1                    | MODERATE           | c.861C>A                           | p.Asn287Lys                               | 0 | FALSE | chr3:41267277:C:A  | 192:chr3:41267277:C:A  | 0.002333 |
| 71_c5-1 | 71 | MIR4673;<br>NOTCH1        | MODIFIER; MODERATE | n.*59A>C;<br>c.931A>C              | p.Thr311Pro                               | 0 | FALSE | chr9:139413211:T:G | 193:chr9:139413211:T:G | 0.637681 |
| 71_c5-1 | 71 | CWH43                     | MODERATE           | c.1535G>A;<br>c.1616G>A            | p.Gly512Asp;<br>p.Gly539Asp               | 0 | FALSE | chr4:49034690:G:A  | 193:chr4:49034690:G:A  | 0.002805 |
| 71_c5-1 | 71 | CDKN2A;<br>CDKN2B-<br>AS1 | MODERATE; MODIFIER | c.22A>G;<br>n.-1T>C                | p.Thr8Ala;                                | 1 | FALSE | chr9:21994309:T:C  | 193:chr9:21994309:T:C  | 0.015267 |
| 71_c5-1 | 71 | EGFR;<br>EGFR-AS1         | MODERATE; MODIFIER | c.2575G>A;<br>n.-1C>T              | p.Ala859Thr                               | 4 | FALSE | chr7:55259517:G:A  | 193:chr7:55259517:G:A  | 0.002972 |
| 71_c5-1 | 71 | NF1                       | HIGH               | c.5380C>T;<br>c.5443C>T            | p.Gln1794*;<br>p.Gln1815*                 | 2 | FALSE | chr17:29654691:C:T | 193:chr17:29654691:C:T | 0.002841 |
| 71_c5-1 | 71 | IGF1R                     | MODERATE           | c.1511G>A                          | p.Arg504His                               | 0 | FALSE | chr15:99454592:G:A | 193:chr15:99454592:G:A | 0.004354 |
| 71_c5-1 | 71 | FBXW7                     | MODERATE           | c.182G>A;<br>c.296G>A;<br>c.536G>A | p.Arg61His;<br>p.Arg99His;<br>p.Arg179His | 0 | FALSE | chr4:153271242:C:T | 193:chr4:153271242:C:T | 0.00321  |
| 71_c5-1 | 71 | IGF1R                     | MODERATE           | c.3934T>C;<br>c.3937T>C            | p.Ser1312Pro;<br>p.Ser1313Pro             | 0 | FALSE | chr15:99500504:T:C | 193:chr15:99500504:T:C | 0.024014 |

|         |    |                    |                            |                                                       |                                                                    |     |       |                        |                                |          |
|---------|----|--------------------|----------------------------|-------------------------------------------------------|--------------------------------------------------------------------|-----|-------|------------------------|--------------------------------|----------|
| 71_c5-1 | 71 | TP53               | MODERATE                   | c.270G>T;<br>c.351G>T;<br>c.630G>T;<br>c.747G>T       | p.Arg90Ser;<br>p.Arg117Ser<br>;<br>p.Arg210Ser<br>;<br>p.Arg249Ser | 318 | FALSE | chr17:757<br>7534:C:A  | 193:chr17:<br>7577534:C<br>:A  | 0.043974 |
| 71_c5-1 | 71 | NF1                | MODERATE                   | c.5420G>A<br>;<br>c.5483G>A                           | p.Arg1807Gl<br>n;<br>p.Arg1828Gl<br>n                              | 2   | FALSE | chr17:296<br>54731:G:A | 193:chr17:<br>29654731:<br>G:A | 0.00277  |
| 71_c5-1 | 71 | MIR4673;<br>NOTCH1 | MODIFIER; MODERATE         | n.*59A>C;<br>c.1195A>C                                | ;<br>p.Thr399Pro                                                   | 0   | FALSE | chr9:1394<br>12649:T:G | 193:chr9:1<br>39412649:<br>T:G | 0.007212 |
| 71_c5-1 | 71 | NF1                | MODERATE                   | c.2695T>G                                             | p.Leu899Val                                                        | 3   | FALSE | chr17:295<br>56328:T:G | 193:chr17:<br>29556328:<br>T:G | 0.004666 |
| 77_c4-2 | 77 | KIT                | MODERATE                   | c.2197G>A<br>;<br>c.2209G>A                           | p.Asp733As<br>n;<br>p.Asp737As<br>n                                | 2   | FALSE | chr4:5559<br>7561:G:A  | 194:chr4:5<br>5597561:G<br>:A  | 0.001389 |
| 77_c4-2 | 77 | TP53               | MODERATE                   | c.128G>A;<br>c.407G>A;<br>c.47G>A;<br>c.524G>A        | p.Arg43His;<br>p.Arg136His<br>;<br>p.Arg16His;<br>p.Arg175His      | 979 | FALSE | chr17:757<br>8406:C:T  | 194:chr17:<br>7578406:C<br>:T  | 0.001813 |
| 77_c4-2 | 77 | HRAS;<br>LRRC56    | MODERATE; MODIFIER         | c.182A>T;<br>c.-506T>A                                | p.Gln61Leu;                                                        | 188 | FALSE | chr11:533<br>874:T:A   | 194:chr11:<br>533874:T:<br>A   | 0.009488 |
| 77_c4-2 | 77 | MIR4673;<br>NOTCH1 | MODIFIER; MODERATE         | n.*59A>C;<br>c.1195A>C                                | ;<br>p.Thr399Pro                                                   | 0   | FALSE | chr9:1394<br>12649:T:G | 194:chr9:1<br>39412649:<br>T:G | 0.006205 |
| 77_c4-2 | 77 | PTEN               | MODERATE                   | c.829A>T                                              | p.Thr277Ser                                                        | 1   | FALSE | chr10:897<br>20678:A:T | 194:chr10:<br>89720678:<br>A:T | 0.003086 |
| 77_c4-2 | 77 | IGF1R              | MODERATE                   | c.3934T>C;<br>c.3937T>C                               | p.Ser1312Pr<br>o;<br>p.Ser1313Pr<br>o                              | 0   | FALSE | chr15:995<br>00504:T:C | 194:chr15:<br>99500504:<br>T:C | 0.01435  |
| 77_c4-2 | 77 | NTRK2              | MODERATE                   | c.412C>A                                              | p.Leu138Ile                                                        | 0   | FALSE | chr9:8732<br>2811:C:A  | 194:chr9:8<br>7322811:C<br>:A  | 0.002123 |
| 77_c4-2 | 77 | C9orf53;<br>CDKN2A | MODIFIER; MODERATE;<br>LOW | n.*616G>A<br>;<br>c.*180C>T;<br>c.257C>T;<br>c.300C>T | ; p.Ala86Val;<br>p.Cys100Cys                                       | 1   | FALSE | chr9:2197<br>1101:G:A  | 194:chr9:2<br>1971101:G<br>:A  | 0.002157 |
| 77_c4-2 | 77 | APC                | MODERATE                   | c.596C>T;<br>c.626C>T                                 | p.Ala199Val;<br>p.Ala209Val                                        | 0   | FALSE | chr5:1121<br>16551:C:T | 194:chr5:1<br>12116551:<br>C:T | 0.001556 |



|         |    |        |                    |                                                             |                                                           |      |       |                     |                         |          |
|---------|----|--------|--------------------|-------------------------------------------------------------|-----------------------------------------------------------|------|-------|---------------------|-------------------------|----------|
| 77_c4-2 | 77 | NF1    | MODERATE           | c.8070G>T;<br>c.8133G>T                                     | p.Leu2690Phe;<br>p.Leu2711Phe                             | 1    | FALSE | chr17:29686006:G:T  | 194:chr17:29686006:G:T  | 0.024963 |
| 77_c4-2 | 77 | NF1    | MODERATE           | c.4030G>A                                                   | p.Glu1344Lys                                              | 2    | FALSE | chr17:29576057:G:A  | 194:chr17:29576057:G:A  | 0.001579 |
| 77_c4-2 | 77 | PIK3CA | MODERATE           | c.1633G>A                                                   | p.Glu545Lys                                               | 1189 | FALSE | chr3:178936091:G:A  | 194:chr3:178936091:G:A  | 0.010621 |
| 77_c4-2 | 77 | FGFR2  | MODIFIER; MODERATE | c.110-13073G>A;<br>n.757-13073G>A;<br>c.157G>A;<br>c.424G>A | p.Asp53Asn;<br>p.Asp142Asn                                | 1    | FALSE | chr10:123324046:C:T | 194:chr10:123324046:C:T | 0.00183  |
| 77_c4-2 | 77 | SMO    | MODERATE           | c.1045A>C                                                   | p.Thr349Pro                                               | 0    | FALSE | chr7:128846115:A:C  | 194:chr7:128846115:A:C  | 0.022881 |
| 77_c4-2 | 77 | NTRK3  | MODERATE           | c.389G>A                                                    | p.Arg130His                                               | 0    | FALSE | chr15:88726655:C:T  | 194:chr15:88726655:C:T  | 0.004172 |
| 77_c4-2 | 77 | KIT    | MODERATE           | c.287C>T                                                    | p.Thr96Met                                                | 1    | FALSE | chr4:55561897:C:T   | 194:chr4:55561897:C:T   | 0.001502 |
| 77_c4-2 | 77 | CDH1   | MODERATE           | c.2204C>T                                                   | p.Ala735Val                                               | 0    | FALSE | chr16:68862116:C:T  | 194:chr16:68862116:C:T  | 0.001517 |
| 77_c4-2 | 77 | IGF1R  | MODERATE           | c.3905T>C;<br>c.3908T>C                                     | p.Val1302Ala;<br>p.Val1303Ala                             | 0    | FALSE | chr15:99500475:T:C  | 194:chr15:99500475:T:C  | 0.005725 |
| 77_c4-2 | 77 | TP53   | MODERATE           | c.688A>C;<br>c.292A>C;<br>c.211A>C;<br>c.571A>C             | p.Thr230Pro;<br>p.Thr98Pro;<br>p.Thr71Pro;<br>p.Thr191Pro | 10   | FALSE | chr17:7577593:T:G   | 194:chr17:7577593:T:G   | 0.001617 |
| 77_c4-2 | 77 | ESR1   | MODERATE           | c.472C>T                                                    | p.Arg158Cys                                               | 0    | FALSE | chr6:152163751:C:T  | 194:chr6:152163751:C:T  | 0.001625 |
| 77_c4-2 | 77 | NOTCH1 | MODERATE           | c.4901C>T                                                   | p.Ala1634Val                                              | 0    | FALSE | chr9:139399242:G:A  | 194:chr9:139399242:G:A  | 0.002227 |
| 77_c4-2 | 77 | TSC1   | MODERATE           | c.2678C>T;<br>c.2828C>T;<br>c.2831C>T                       | p.Ala893Val;<br>p.Ala943Val;<br>p.Ala944Val               | 0    | FALSE | chr9:135772715:G:A  | 194:chr9:135772715:G:A  | 0.00161  |
| 77_c4-2 | 77 | FLT3   | MODERATE           | c.2440G>A                                                   | p.Ala814Thr                                               | 0    | FALSE | chr13:28592705:C:T  | 194:chr13:28592705:C:T  | 0.001668 |
| 77_c4-2 | 77 | IGF1R  | MODERATE           | c.1172G>A                                                   | p.Arg391His                                               | 0    | FALSE | chr15:99442775:G:A  | 194:chr15:99442775:G:A  | 0.001789 |

|         |    |                             |                    |                                                                                                                  |                                                             |      |       |                     |                         |          |
|---------|----|-----------------------------|--------------------|------------------------------------------------------------------------------------------------------------------|-------------------------------------------------------------|------|-------|---------------------|-------------------------|----------|
| 77_c4-2 | 77 | ERBB2;<br>MIEN1;<br>MIR4728 | MODIFIER; MODERATE | c.3160-213A>G;<br>c.3251A>G<br>;<br>c.3296A>G<br>;<br>c.3341A>G<br>;<br>n.3665A>G<br>;<br>c.*388T>C;<br>n.*67A>G | p.Glu1084Gly;<br>p.Glu1099Gly;<br>p.Glu1114Gly              | 1    | FALSE | chr17:37883729:A:G  | 194:chr17:37883729:A:G  | 0.002566 |
| 77_c4-2 | 77 | IGF1R                       | MODERATE           | c.314T>C                                                                                                         | p.Val105Ala                                                 | 0    | FALSE | chr15:99251010:T:C  | 194:chr15:99251010:T:C  | 0.003213 |
| 77_c4-2 | 77 | NF1                         | MODERATE           | c.2695T>G                                                                                                        | p.Leu899Val                                                 | 3    | FALSE | chr17:29556328:T:G  | 194:chr17:29556328:T:G  | 0.004212 |
| 77_c4-2 | 77 | FGFR3                       | MODERATE           | c.1573G>T<br>;<br>c.1909G>T<br>;<br>c.1915G>T                                                                    | p.Gly525Trp<br>;<br>p.Gly637Trp<br>;<br>p.Gly639Trp         | 1    | FALSE | chr4:1807850:G:T    | 194:chr4:1807850:G:T    | 0.002167 |
| 77_c4-2 | 77 | NTRK1                       | MODERATE           | c.1940T>G<br>;<br>c.2030T>G<br>;<br>c.2048T>G                                                                    | p.Val647Gly;<br>p.Val677Gly;<br>p.Val683Gly                 | 2    | FALSE | chr1:156849792:T:G  | 194:chr1:156849792:T:G  | 0.031596 |
| 82_c6-1 | 82 | PIK3CA                      | MODERATE           | c.1633G>A                                                                                                        | p.Glu545Lys                                                 | 1189 | FALSE | chr3:178936091:G:A  | 195:chr3:178936091:G:A  | 0.130056 |
| 82_c6-1 | 82 | VHL                         | MODIFIER; MODERATE | c.341-3238G>A;<br>c.376G>A                                                                                       | p.Asp126Asn                                                 | 0    | FALSE | chr3:10188233:G:A   | 195:chr3:10188233:G:A   | 0.001718 |
| 82_c6-1 | 82 | TP53                        | MODERATE           | c.337G>A;<br>c.418G>A;<br>c.697G>A;<br>c.814G>A                                                                  | p.Val113Met;<br>p.Val140Met;<br>p.Val233Met;<br>p.Val272Met | 85   | FALSE | chr17:7577124:C:T   | 195:chr17:7577124:C:T   | 0.023992 |
| 82_c6-1 | 82 | MIR4673;<br>NOTCH1          | MODIFIER; HIGH     | n.*59C>T;<br>c.1324C>T                                                                                           | p.Gln442*                                                   | 0    | FALSE | chr9:139412321:G:A  | 195:chr9:139412321:G:A  | 0.002513 |
| 82_c6-1 | 82 | ATM                         | MODERATE           | c.2075G>A                                                                                                        | p.Arg692His                                                 | 0    | FALSE | chr11:108124717:G:A | 195:chr11:108124717:G:A | 0.001446 |
| 82_c6-1 | 82 | PHLPP1                      | LOW                | c.2706A>G                                                                                                        | p.Ser902Ser                                                 | 0    | FALSE | chr18:60572515:A:G  | 195:chr18:60572515:A:G  | 0.002162 |

|         |    |        |                    |                                                                               |                                                             |     |       |                    |                        |          |
|---------|----|--------|--------------------|-------------------------------------------------------------------------------|-------------------------------------------------------------|-----|-------|--------------------|------------------------|----------|
| 82_c6-1 | 82 | IGF1R  | MODERATE           | c.3934T>C;<br>c.3937T>C                                                       | p.Ser1312Pro;<br>p.Ser1313Pro                               | 0   | FALSE | chr15:99500504:T:C | 195:chr15:99500504:T:C | 0.016708 |
| 82_c6-1 | 82 | TP53   | MODIFIER; MODERATE | c.*145T>C;<br>c.*233T>C;<br>c.1009T>C;<br>c.1126T>C;<br>c.649T>C;<br>c.730T>C | p.Ser337Pro;<br>p.Ser376Pro;<br>p.Ser217Pro;<br>p.Ser244Pro | 2   | FALSE | chr17:7572983:A:G  | 195:chr17:7572983:A:G  | 0.004213 |
| 82_c6-1 | 82 | KDR    | MODERATE           | c.1399G>A                                                                     | p.Ala467Thr                                                 | 2   | FALSE | chr4:55973917:C:T  | 195:chr4:55973917:C:T  | 0.00304  |
| 82_c6-1 | 82 | KDR    | MODERATE           | c.2323G>T                                                                     | p.Ala775Ser                                                 | 1   | FALSE | chr4:55964914:C:A  | 195:chr4:55964914:C:A  | 0.001663 |
| 82_c6-1 | 82 | NOTCH1 | MODERATE           | c.4901C>T                                                                     | p.Ala1634Val                                                | 0   | FALSE | chr9:139399242:G:A | 195:chr9:139399242:G:A | 0.002105 |
| 82_c6-1 | 82 | NF1    | MODERATE           | c.5426G>A;<br>c.5489G>A                                                       | p.Arg1809His;<br>p.Arg1830His                               | 1   | FALSE | chr17:29654737:G:A | 195:chr17:29654737:G:A | 0.001439 |
| 82_c6-1 | 82 | TP53   | HIGH               | c.109C>T;<br>c.190C>T;<br>c.469C>T;<br>c.586C>T                               | p.Arg37*;<br>p.Arg64*;<br>p.Arg157*;<br>p.Arg196*           | 191 | FALSE | chr17:7578263:G:A  | 195:chr17:7578263:G:A  | 0.14924  |
| 82_c6-1 | 82 | FGFR3  | MODERATE           | c.1582C>T;<br>c.1918C>T;<br>c.1924C>T                                         | p.Arg528Trp;<br>p.Arg640Trp;<br>p.Arg642Trp                 | 1   | FALSE | chr4:1807859:C:T   | 195:chr4:1807859:C:T   | 0.002026 |
| 82_c6-1 | 82 | KIT    | MODERATE           | c.391G>A                                                                      | p.Asp131Asn                                                 | 1   | FALSE | chr4:55564503:G:A  | 195:chr4:55564503:G:A  | 0.001559 |
| 82_c6-1 | 82 | IGF1R  | MODERATE           | c.3905T>C;<br>c.3908T>C                                                       | p.Val1302Ala;<br>p.Val1303Ala                               | 0   | FALSE | chr15:99500475:T:C | 195:chr15:99500475:T:C | 0.002636 |
| 82_c6-1 | 82 | TP53   | MODERATE           | c.119T>C;<br>c.38T>C;<br>c.398T>C;<br>c.515T>C                                | p.Val40Ala;<br>p.Val13Ala;<br>p.Val133Ala;<br>p.Val172Ala   | 12  | FALSE | chr17:7578415:A:G  | 195:chr17:7578415:A:G  | 0.001892 |

|         |    |                    |                            |                                                           |                                                             |     |       |                        |                                |          |
|---------|----|--------------------|----------------------------|-----------------------------------------------------------|-------------------------------------------------------------|-----|-------|------------------------|--------------------------------|----------|
| 82_c6-1 | 82 | PIK3R1             | MODIFIER; MODERATE         | c.-17G>A;<br>c.1073G>A;<br>c.173G>A;<br>c.263G>A          | ; p.Arg358Gln;<br>; p.Arg58Gln;<br>p.Arg88Gln               | 1   | FALSE | chr5:6758<br>8982:G:A  | 195:chr5:6<br>7588982:G<br>:A  | 0.002398 |
| 82_c6-1 | 82 | TP53               | MODERATE                   | c.815T>G;<br>c.419T>G;<br>c.338T>G;<br>c.698T>G           | p.Val272Gly;<br>p.Val140Gly;<br>p.Val113Gly;<br>p.Val233Gly | 9   | FALSE | chr17:757<br>7123:A:C  | 195:chr17:<br>7577123:A<br>:C  | 0.001932 |
| 82_c6-1 | 82 | TP53               | MODIFIER; MODERATE         | c.-9G>C;<br>c.352G>C;<br>c.469G>C;<br>c.73G>C             | ; p.Val118Leu<br>; p.Val157Leu<br>; p.Val25Leu              | 169 | FALSE | chr17:757<br>8461:C:G  | 195:chr17:<br>7578461:C<br>:G  | 0.001988 |
| 82_c6-1 | 82 | SMO                | MODERATE                   | c.628G>A                                                  | p.Val210Met                                                 | 0   | FALSE | chr7:1288<br>45134:G:A | 195:chr7:1<br>28845134:<br>G:A | 0.001876 |
| 82_c6-1 | 82 | NOTCH1             | MODERATE                   | c.5098G>A                                                 | p.Ala1700Thr                                                | 0   | FALSE | chr9:1393<br>97703:C:T | 195:chr9:1<br>39397703:<br>C:T | 0.001892 |
| 82_c6-1 | 82 | EGFR;<br>EGFR-AS1  | MODERATE; MODIFIER         | c.2432C>T;<br>n.1130G>A                                   | p.Ser811Phe                                                 | 1   | FALSE | chr7:5524<br>9134:C:T  | 195:chr7:5<br>5249134:C<br>:T  | 0.001478 |
| 82_c6-1 | 82 | SMO                | MODERATE                   | c.1045A>C                                                 | p.Thr349Pro                                                 | 0   | FALSE | chr7:1288<br>46115:A:C | 195:chr7:1<br>28846115:<br>A:C | 0.017195 |
| 82_c6-1 | 82 | C9orf53;<br>CDKN2A | MODIFIER; MODERATE         | n.*616C>G<br>;<br>c.*140G>C<br>;<br>c.217G>C;<br>c.260G>C | ; p.Ala73Pro;<br>p.Arg87Pro                                 | 1   | FALSE | chr9:2197<br>1141:C:G  | 195:chr9:2<br>1971141:C<br>:G  | 0.006    |
| 82_c6-1 | 82 | HGF                | MODERATE                   | c.1856A>G<br>;<br>c.1841A>G                               | p.Tyr619Cys<br>;<br>p.Tyr614Cys                             | 0   | FALSE | chr7:8133<br>4971:T:C  | 195:chr7:8<br>1334971:T<br>:C  | 0.001845 |
| 82_c6-1 | 82 | C9orf53;<br>CDKN2A | MODIFIER; MODERATE;<br>LOW | n.*616C>T<br>;<br>c.*232G>A<br>;<br>c.352G>A;<br>c.309G>A | ; p.Ala118Thr<br>; p.Arg103Arg                              | 1   | FALSE | chr9:2197<br>1049:C:T  | 195:chr9:2<br>1971049:C<br>:T  | 0.002162 |
| 82_c6-1 | 82 | NTRK1              | MODERATE                   | c.1940T>G<br>;<br>c.2030T>G<br>;<br>c.2048T>G             | p.Val647Gly;<br>p.Val677Gly;<br>p.Val683Gly                 | 2   | FALSE | chr1:1568<br>49792:T:G | 195:chr1:1<br>56849792:<br>T:G | 0.025192 |

|          |     |                    |                    |                                                           |                                                               |     |       |                        |                                |          |
|----------|-----|--------------------|--------------------|-----------------------------------------------------------|---------------------------------------------------------------|-----|-------|------------------------|--------------------------------|----------|
| 82_c6-1  | 82  | CTNNB1             | MODERATE           | c.643G>A                                                  | p.Ala215Thr                                                   | 0   | FALSE | chr3:4126<br>6972:G:A  | 195:chr3:4<br>1266972:G<br>:A  | 0.00158  |
| 105_c2-1 | 105 | NOTCH1             | MODERATE           | c.4571C>T                                                 | p.Ala1524Val                                                  | 0   | FALSE | chr9:1393<br>99777:G:A | 197:chr9:1<br>39399777:<br>G:A | 0.002621 |
| 105_c2-1 | 105 | NTRK1              | MODERATE           | c.1940T>G<br>;<br>c.2030T>G<br>;<br>c.2048T>G             | p.Val647Gly;<br>p.Val677Gly;<br>p.Val683Gly                   | 2   | FALSE | chr1:1568<br>49792:T:G | 197:chr1:1<br>56849792:<br>T:G | 0.025896 |
| 105_c2-1 | 105 | STK11              | MODERATE           | c.971C>T                                                  | p.Pro324Leu                                                   | 2   | FALSE | chr19:122<br>3034:C:T  | 197:chr19:<br>1223034:C<br>:T  | 0.002688 |
| 105_c2-1 | 105 | MIR4673;<br>NOTCH1 | MODIFIER; MODERATE | n.*59A>C;<br>c.1195A>C                                    | p.Thr399Pro                                                   | 0   | FALSE | chr9:1394<br>12649:T:G | 197:chr9:1<br>39412649:<br>T:G | 0.008523 |
| 105_c2-1 | 105 | BRAF               | MODERATE           | c.1781A>G                                                 | p.Asp594Gly                                                   | 59  | FALSE | chr7:1404<br>53154:T:C | 197:chr7:1<br>40453154:<br>T:C | 0.004878 |
| 105_c2-1 | 105 | RET                | MODERATE           | c.1690A>C                                                 | p.Thr564Pro                                                   | 1   | FALSE | chr10:436<br>08342:A:C | 197:chr10:<br>43608342:<br>A:C | 0.008979 |
| 105_c2-1 | 105 | TP53               | MODERATE           | c.11A>G;<br>c.371A>G;<br>c.488A>G;<br>c.92A>G             | p.Tyr4Cys;<br>p.Tyr124Cys<br>;<br>p.Tyr163Cys<br>; p.Tyr31Cys | 132 | FALSE | chr17:757<br>8442:T:C  | 197:chr17:<br>7578442:T<br>:C  | 0.002367 |
| 105_c2-1 | 105 | C9orf53;<br>CDKN2A | MODIFIER; MODERATE | n.*616C>G<br>;<br>c.*140G>C<br>;<br>c.217G>C;<br>c.260G>C | p.Ala73Pro;<br>p.Arg87Pro                                     | 1   | FALSE | chr9:2197<br>1141:C:G  | 197:chr9:2<br>1971141:C<br>:G  | 0.023316 |
| 105_c2-1 | 105 | NTRK1              | MODERATE           | c.2017G>A<br>;<br>c.2107G>A<br>;<br>c.2125G>A             | p.Asp673Asn;<br>p.Asp703Asn;<br>p.Asp709Asn                   | 1   | FALSE | chr1:1568<br>49869:G:A | 197:chr1:1<br>56849869:<br>G:A | 0.00246  |
| 105_c2-1 | 105 | SMO                | MODERATE           | c.1225G>A                                                 | p.Gly409Ser                                                   | 0   | FALSE | chr7:1288<br>46389:G:A | 197:chr7:1<br>28846389:<br>G:A | 0.002301 |
| 105_c2-1 | 105 | NF1                | MODERATE           | c.7718G>A<br>;<br>c.7781G>A                               | p.Arg2573His;<br>p.Arg2594His                                 | 3   | FALSE | chr17:296<br>84020:G:A | 197:chr17:<br>29684020:<br>G:A | 0.002215 |
| 105_c2-1 | 105 | NTRK3              | MODERATE           | c.2119C>T;<br>c.2143C>T;<br>c.2185C>T                     | p.His707Tyr;<br>p.His715Tyr;<br>p.His729Tyr                   | 0   | FALSE | chr15:884<br>23650:G:A | 197:chr15:<br>88423650:<br>G:A | 0.003356 |

|           |     |                                 |                    |                                                   |                                                                         |     |       |                             |                                 |          |
|-----------|-----|---------------------------------|--------------------|---------------------------------------------------|-------------------------------------------------------------------------|-----|-------|-----------------------------|---------------------------------|----------|
| 105_c2-1  | 105 | FOXL2;<br>FOXL2NB;<br>LINC01391 | MODERATE; MODIFIER | c.415G>A;<br>c.-132C>T;<br>n.-1G>A                | p.Glu139Lys<br>;                                                        | 0   | FALSE | chr3:1386<br>65150:C:T      | 197:chr3:1<br>38665150:<br>C:T  | 0.003781 |
| 105_c2-1  | 105 | PIK3CA                          | MODERATE           | c.2230T>A                                         | p.Phe744Ile                                                             | 1   | FALSE | chr3:1789<br>41911:T:A      | 197:chr3:1<br>78941911:<br>T:A  | 0.002334 |
| 105_c2-1  | 105 | PIK3CA                          | MODERATE           | c.2209G>A                                         | p.Glu737Lys                                                             | 1   | FALSE | chr3:1789<br>41890:G:A      | 197:chr3:1<br>78941890:<br>G:A  | 0.002307 |
| 105_c2-1  | 105 | RET                             | MODERATE           | c.1783G>A                                         | p.Glu595Lys                                                             | 1   | FALSE | chr10:436<br>09027:G:A      | 197:chr10:<br>43609027:<br>G:A  | 0.002384 |
| 105_c2-1  | 105 | TP53                            | MODERATE; MODIFIER | c.377A>C;<br>c.260A>C;<br>c.-20A>C;<br>c.-101A>C  | p.Tyr126Ser;<br>p.Tyr87Ser;                                             | 10  | FALSE | chr17:757<br>8553:T:G       | 197:chr17:<br>7578553:T<br>:G   | 0.002356 |
| 105_c2-1  | 105 | NF1                             | MODERATE           | c.2695T>G                                         | p.Leu899Val                                                             | 3   | FALSE | chr17:295<br>56328:T:G      | 197:chr17:<br>29556328:<br>T:G  | 0.003444 |
| 105_c2-1  | 105 | NOTCH1                          | MODERATE           | c.4984C>T                                         | p.Arg1662Tr<br>p                                                        | 0   | FALSE | chr9:1393<br>99159:G:A      | 197:chr9:1<br>39399159:<br>G:A  | 0.004038 |
| 105_c2-1  | 105 | SMO                             | MODERATE           | c.1045A>C                                         | p.Thr349Pro                                                             | 0   | FALSE | chr7:1288<br>46115:A:C      | 197:chr7:1<br>28846115:<br>A:C  | 0.024775 |
| 105_c2-1  | 105 | NOTCH1                          | MODERATE           | c.4828G>A                                         | p.Ala1610Th<br>r                                                        | 0   | FALSE | chr9:1393<br>99315:C:T      | 197:chr9:1<br>39399315:<br>C:T  | 0.002778 |
| 105_c2-1  | 105 | IGF1R                           | MODERATE           | c.3934T>C;<br>c.3937T>C                           | p.Ser1312Pr<br>o;<br>p.Ser1313Pr<br>o                                   | 0   | FALSE | chr15:995<br>00504:T:C      | 197:chr15:<br>99500504:<br>T:C  | 0.010582 |
| 105_c2-1  | 105 | TP53                            | MODERATE           | c.341G>A;<br>c.422G>A;<br>c.701G>A;<br>c.818G>A   | p.Arg114His<br>;<br>p.Arg141His<br>;<br>p.Arg234His<br>;<br>p.Arg273His | 647 | TRUE  | chr17:757<br>7120:C:T       | 197:chr17:<br>7577120:C<br>:T   | 0.008393 |
| 105_c2-1  | 105 | MAP2K1                          | MODERATE           | c.140G>A                                          | p.Arg47Gln                                                              | 4   | FALSE | chr15:667<br>27424:G:A      | 197:chr15:<br>66727424:<br>G:A  | 0.002002 |
| 5_t3c2-1  | 5   | CDKN2A                          | MODIFIER; MODERATE | c.194-<br>3607G>A;<br>c.13G>A                     | p.Ala5Thr                                                               | 2   | FALSE | chr9:2197<br>4814:C:T       | 198:chr9:2<br>1974814:C<br>:T   | 0.02381  |
| 5_t3c2-1  | 5   | ATM                             | HIGH               | c.5623C>T                                         | p.Arg1875*                                                              | 0   | FALSE | chr11:108<br>175528:C:<br>T | 198:chr11:<br>10817552<br>8:C:T | 0.018519 |
| 69_t2c3-2 | 69  | TP53                            | MODERATE; MODIFIER | c.170C>T;<br>c.287C>T;<br>c.-279C>T;<br>c.-360C>T | p.Ser57Phe;<br>p.Ser96Phe;                                              | 3   | FALSE | chr17:757<br>9400:G:A       | 200:chr17:<br>7579400:G<br>:A   | 0.011905 |

|           |    |                    |                            |                                                   |                               |     |       |                     |                         |          |
|-----------|----|--------------------|----------------------------|---------------------------------------------------|-------------------------------|-----|-------|---------------------|-------------------------|----------|
| 69_t2c3-2 | 69 | KDR                | MODERATE                   | c.1028C>T                                         | p.Thr343Met                   | 3   | FALSE | chr4:55976884:G:A   | 200:chr4:55976884:G:A   | 0.005474 |
| 69_t2c3-2 | 69 | PHLPP1             | HIGH                       | c.2179C>T                                         | p.Arg727*                     | 0   | FALSE | chr18:60562356:C:T  | 200:chr18:60562356:C:T  | 0.00905  |
| 84_bl-2   | 84 | PIK3CA             | MODERATE                   | c.1624G>A                                         | p.Glu542Lys                   | 777 | FALSE | chr3:178936082:G:A  | 201:chr3:178936082:G:A  | 0.021944 |
| 84_bl-2   | 84 | IGF1R              | MODERATE                   | c.3905T>C;<br>c.3908T>C                           | p.Val1302Ala;<br>p.Val1303Ala | 0   | FALSE | chr15:99500475:T:C  | 201:chr15:99500475:T:C  | 0.006689 |
| 84_bl-2   | 84 | CWH43              | MODERATE                   | c.1396G>A;<br>c.1315G>A                           | p.Glu466Lys;<br>p.Glu439Lys   | 0   | FALSE | chr4:49032865:G:A   | 201:chr4:49032865:G:A   | 0.006135 |
| 87_c1-2   | 87 | C9orf53;<br>CDKN2A | MODIFIER; MODERATE;<br>LOW | n.*616T>G;<br>c.*120A>C;<br>c.197A>C;<br>c.240A>C | p.His66Pro;<br>p.Pro80Pro     | 1   | FALSE | chr9:21971161:T:G   | 202:chr9:21971161:T:G   | 0.016529 |
| 87_c1-2   | 87 | APC                | MODIFIER; HIGH             | c.676-8785C>T;<br>c.694C>T                        | p.Arg232*                     | 0   | FALSE | chr5:112128191:C:T  | 202:chr5:112128191:C:T  | 0.032258 |
| 87_c1-2   | 87 | EGFR               | MODERATE                   | c.844G>A                                          | p.Glu282Lys                   | 1   | FALSE | chr7:55221800:G:A   | 202:chr7:55221800:G:A   | 0.008264 |
| 87_c1-2   | 87 | KRAS               | MODERATE                   | c.183A>C                                          | p.Gln61His                    | 149 | FALSE | chr12:25380275:T:G  | 202:chr12:25380275:T:G  | 0.027778 |
| 5_bl-3    | 5  | PTEN               | MODERATE                   | c.850G>A                                          | p.Glu284Lys                   | 2   | FALSE | chr10:89720699:G:A  | 203:chr10:89720699:G:A  | 0.003231 |
| 5_bl-3    | 5  | RET                | MODERATE                   | c.1690A>C                                         | p.Thr564Pro                   | 1   | FALSE | chr10:43608342:A:C  | 203:chr10:43608342:A:C  | 0.004155 |
| 5_bl-3    | 5  | CDKN2A             | MODIFIER; MODERATE         | c.194-3568A>C;<br>c.52A>C                         | p.Thr18Pro                    | 1   | FALSE | chr9:21974775:T:G   | 203:chr9:21974775:T:G   | 0.004264 |
| 5_bl-3    | 5  | BRAF               | MODERATE                   | c.2153C>T                                         | p.Ala718Val                   | 1   | FALSE | chr7:140434545:G:A  | 203:chr7:140434545:G:A  | 0.005587 |
| 5_bl-3    | 5  | IGF1R              | MODERATE                   | c.3934T>C;<br>c.3937T>C                           | p.Ser1312Pro;<br>p.Ser1313Pro | 0   | FALSE | chr15:99500504:T:C  | 203:chr15:99500504:T:C  | 0.007837 |
| 5_bl-3    | 5  | ATM                | MODERATE                   | c.7183G>A                                         | p.Asp2395Asn                  | 0   | FALSE | chr11:108199841:G:A | 203:chr11:108199841:G:A | 0.00303  |

|         |    |                                 |                    |                                                                                                  |                                                             |    |       |                    |                        |          |
|---------|----|---------------------------------|--------------------|--------------------------------------------------------------------------------------------------|-------------------------------------------------------------|----|-------|--------------------|------------------------|----------|
| 5_bl-3  | 5  | ERBB2;<br>MIEN1;<br>MIR4728     | MODIFIER; MODERATE | c.3160-213A>G;<br>c.3251A>G;<br>c.3296A>G;<br>c.3341A>G;<br>n.3665A>G;<br>c.*388T>C;<br>n.*67A>G | p.Glu1084Gly;<br>p.Glu1099Gly;<br>p.Glu1114Gly              | 1  | FALSE | chr17:37883729:A:G | 203:chr17:37883729:A:G | 0.009245 |
| 5_bl-3  | 5  | C9orf53;<br>CDKN2A              | MODIFIER; MODERATE | n.*616C>G;<br>c.*140G>C;<br>c.217G>C;<br>c.260G>C                                                | p.Ala73Pro;<br>p.Arg87Pro                                   | 1  | FALSE | chr9:21971141:C:G  | 203:chr9:21971141:C:G  | 0.01634  |
| 70_c7-2 | 70 | FOXL2;<br>FOXL2NB;<br>LINC01391 | MODERATE; MODIFIER | c.282T>A;<br>c.-132A>T;<br>n.-1T>A                                                               | p.Asn94Lys;                                                 | 0  | FALSE | chr3:138665283:A:T | 204:chr3:138665283:A:T | 0.030151 |
| 70_c7-2 | 70 | IGF1R                           | MODERATE           | c.3934T>C;<br>c.3937T>C                                                                          | p.Ser1312Pro;<br>p.Ser1313Pro                               | 0  | FALSE | chr15:99500504:T:C | 204:chr15:99500504:T:C | 0.012048 |
| 70_c7-2 | 70 | IGF1R                           | MODERATE           | c.3905T>C;<br>c.3908T>C                                                                          | p.Val1302Ala;<br>p.Val1303Ala                               | 0  | FALSE | chr15:99500475:T:C | 204:chr15:99500475:T:C | 0.006154 |
| 70_c7-2 | 70 | PIK3CA                          | MODERATE           | c.400C>T                                                                                         | p.Pro134Ser                                                 | 2  | FALSE | chr3:178917525:C:T | 204:chr3:178917525:C:T | 0.005025 |
| 70_c7-2 | 70 | TP53                            | MODIFIER; MODERATE | c.*117G>T;<br>c.*29G>T;<br>c.1010G>T;<br>c.533G>T;<br>c.614G>T;<br>c.893G>T                      | p.Arg337Leu;<br>p.Arg178Leu;<br>p.Arg205Leu;<br>p.Arg298Leu | 21 | FALSE | chr17:7574017:C:A  | 204:chr17:7574017:C:A  | 0.019718 |
| 70_c7-2 | 70 | SMO                             | MODERATE           | c.1045A>C                                                                                        | p.Thr349Pro                                                 | 0  | FALSE | chr7:128846115:A:C | 204:chr7:128846115:A:C | 0.007042 |
| 80_c4-2 | 80 | EGFR                            | MODIFIER; MODERATE | c.*2133G>A;<br>c.*2364G>A;<br>c.2030G>A                                                          | p.Arg677His                                                 | 5  | FALSE | chr7:55240786:G:A  | 205:chr7:55240786:G:A  | 0.003683 |



|         |    |                    |                            |                                                           |                                                                         |     |       |                        |                                |          |
|---------|----|--------------------|----------------------------|-----------------------------------------------------------|-------------------------------------------------------------------------|-----|-------|------------------------|--------------------------------|----------|
| 80_c4-2 | 80 | C9orf53;<br>CDKN2A | MODIFIER; MODERATE;<br>LOW | n.*616T>G<br>;<br>c.*120A>C<br>;<br>c.197A>C;<br>c.240A>C | p.His66Pro;<br>p.Pro80Pro                                               | 1   | FALSE | chr9:2197<br>1161:T:G  | 205:chr9:2<br>1971161:T<br>:G  | 0.015152 |
| 80_c4-2 | 80 | KDR                | MODERATE                   | c.3154G>A                                                 | p.Asp1052A<br>sn                                                        | 2   | FALSE | chr4:5595<br>6161:C:T  | 205:chr4:5<br>5956161:C<br>:T  | 0.00267  |
| 80_c4-2 | 80 | C9orf53;<br>CDKN2A | MODIFIER; MODERATE         | n.*616C>T<br>;<br>c.*245G>A<br>;<br>c.322G>A;<br>c.365G>A | p.Asp108As<br>n;<br>p.Arg122Gln                                         | 14  | FALSE | chr9:2197<br>1036:C:T  | 205:chr9:2<br>1971036:C<br>:T  | 0.00315  |
| 80_c4-2 | 80 | NF1                | MODERATE                   | c.109G>A                                                  | p.Glu37Lys                                                              | 1   | FALSE | chr17:294<br>83049:G:A | 205:chr17:<br>29483049:<br>G:A | 0.002869 |
| 80_c4-2 | 80 | IGF1R              | MODERATE                   | c.3934T>C;<br>c.3937T>C                                   | p.Ser1312Pro;<br>p.Ser1313Pro                                           | 0   | FALSE | chr15:995<br>00504:T:C | 205:chr15:<br>99500504:<br>T:C | 0.002972 |
| 80_c4-2 | 80 | STK11              | MODERATE                   | c.455A>G                                                  | p.Gln152Arg                                                             | 3   | FALSE | chr19:121<br>9403:A:G  | 205:chr19:<br>1219403:A<br>:G  | 0.004008 |
| 80_c4-2 | 80 | TP53               | MODERATE                   | c.389T>C;<br>c.470T>C;<br>c.749T>C;<br>c.866T>C           | p.Leu130Pro<br>;<br>p.Leu157Pro<br>;<br>p.Leu250Pro<br>;<br>p.Leu289Pro | 2   | FALSE | chr17:757<br>7072:A:G  | 205:chr17:<br>7577072:A<br>:G  | 0.00303  |
| 80_c4-2 | 80 | RET                | MODERATE                   | c.1690A>C                                                 | p.Thr564Pro                                                             | 1   | FALSE | chr10:436<br>08342:A:C | 205:chr10:<br>43608342:<br>A:C | 0.002801 |
| 80_c4-2 | 80 | VHL                | MODIFIER; MODERATE         | c.341-<br>3270A>C;<br>c.344A>C                            | p.His115Pro                                                             | 0   | FALSE | chr3:1018<br>8201:A:C  | 205:chr3:1<br>0188201:A<br>:C  | 0.003396 |
| 80_c4-2 | 80 | PIK3CA             | MODERATE                   | c.328G>A                                                  | p.Glu110Lys                                                             | 4   | FALSE | chr3:1789<br>16941:G:A | 205:chr3:1<br>78916941:<br>G:A | 0.003058 |
| 80_c4-2 | 80 | CDKN2A             | MODIFIER; MODERATE         | c.194-<br>3568A>C;<br>c.52A>C                             | p.Thr18Pro                                                              | 1   | FALSE | chr9:2197<br>4775:T:G  | 205:chr9:2<br>1974775:T<br>:G  | 0.008696 |
| 88_bl-2 | 88 | TP53               | MODERATE                   | c.340C>T;<br>c.421C>T;<br>c.700C>T;<br>c.817C>T           | p.Arg114Cys<br>;<br>p.Arg141Cys<br>;<br>p.Arg234Cys<br>;<br>p.Arg273Cys | 601 | FALSE | chr17:757<br>7121:G:A  | 206:chr17:<br>7577121:G<br>:A  | 0.127572 |
| 88_bl-2 | 88 | PIK3CA             | MODERATE                   | c.1624G>A                                                 | p.Glu542Lys                                                             | 777 | FALSE | chr3:1789<br>36082:G:A | 206:chr3:1<br>78936082:<br>G:A | 0.055762 |

|          |     |        |                    |                                                 |                                                                |       |       |                     |                         |          |
|----------|-----|--------|--------------------|-------------------------------------------------|----------------------------------------------------------------|-------|-------|---------------------|-------------------------|----------|
| 88_bl-2  | 88  | NTRK2  | MODERATE           | c.1822G>A;<br>; c.1870G>A                       | p.Val608Met;<br>p.Val624Met                                    | 0     | FALSE | chr9:87563482:G:A   | 206:chr9:87563482:G:A   | 0.101754 |
| 88_bl-2  | 88  | AR     | MODERATE           | c.2488G>A;<br>; c.892G>A                        | p.Glu830Lys;<br>; p.Glu298Lys                                  | 0     | FALSE | chrX:66942707:G:A   | 206:chrX:66942707:G:A   | 0.014599 |
| 88_bl-2  | 88  | KRAS   | MODERATE           | c.35G>A                                         | p.Gly12Asp                                                     | 11213 | FALSE | chr12:25398284:C:T  | 206:chr12:25398284:C:T  | 0.119469 |
| 105_c3-1 | 105 | ALK    | MODERATE           | c.4280C>T                                       | p.Ser1427Phe                                                   | 2     | FALSE | chr2:29416673:G:A   | 207:chr2:29416673:G:A   | 0.002639 |
| 105_c3-1 | 105 | IGF1R  | MODERATE           | c.3905T>C;<br>c.3908T>C                         | p.Val1302Ala;<br>p.Val1303Ala                                  | 0     | FALSE | chr15:99500475:T:C  | 207:chr15:99500475:T:C  | 0.005964 |
| 105_c3-1 | 105 | CTNNB1 | MODERATE           | c.134C>G                                        | p.Ser45Cys                                                     | 0     | FALSE | chr3:41266137:C:G   | 207:chr3:41266137:C:G   | 0.003077 |
| 105_c3-1 | 105 | TP53   | MODERATE           | c.11A>G;<br>c.371A>G;<br>c.488A>G;<br>c.92A>G   | p.Tyr4Cys;<br>p.Tyr124Cys;<br>; p.Tyr163Cys;<br>; p.Tyr31Cys   | 132   | FALSE | chr17:7578442:T:C   | 207:chr17:7578442:T:C   | 0.006012 |
| 105_c3-1 | 105 | CDH1   | MODERATE           | c.221G>A                                        | p.Arg74Gln                                                     | 0     | FALSE | chr16:68835630:G:A  | 207:chr16:68835630:G:A  | 0.002972 |
| 105_c3-1 | 105 | BRAF   | MODERATE           | c.1385G>A                                       | p.Arg462Lys                                                    | 2     | FALSE | chr7:140481423:C:T  | 207:chr7:140481423:C:T  | 0.00241  |
| 105_c3-1 | 105 | ATM    | HIGH               | c.5623C>T                                       | p.Arg1875*                                                     | 0     | FALSE | chr11:108175528:C:T | 207:chr11:108175528:C:T | 0.004566 |
| 105_c3-1 | 105 | NF1    | MODIFIER; MODERATE | c.*2165C>T;<br>; c.2117C>T                      | p.Ala706Val                                                    | 1     | FALSE | chr17:29553568:C:T  | 207:chr17:29553568:C:T  | 0.002361 |
| 105_c3-1 | 105 | FGFR1  | MODERATE           | c.107C>T;<br>c.350C>T;<br>c.374C>T;<br>c.473C>T | p.Ser36Leu;<br>p.Ser117Leu;<br>; p.Ser125Leu;<br>; p.Ser158Leu | 2     | FALSE | chr8:38285938:G:A   | 207:chr8:38285938:G:A   | 0.003053 |
| 105_c3-1 | 105 | STK11  | HIGH               | c.667G>T                                        | p.Glu223*                                                      | 2     | FALSE | chr19:1220649:G:T   | 207:chr19:1220649:G:T   | 0.013477 |
| 105_c3-1 | 105 | NF1    | HIGH               | c.1318C>T                                       | p.Arg440*                                                      | 10    | FALSE | chr17:29533315:C:T  | 207:chr17:29533315:C:T  | 0.003597 |
| 105_c3-1 | 105 | ALK    | MODERATE           | c.3824G>A                                       | p.Arg1275Gln                                                   | 79    | FALSE | chr2:29432664:C:T   | 207:chr2:29432664:C:T   | 0.003026 |
| 105_c3-1 | 105 | TSC1   | HIGH               | c.982C>T;<br>c.829C>T                           | p.Gln328*;<br>p.Gln277*                                        | 0     | FALSE | chr9:135786887:G:A  | 207:chr9:135786887:G:A  | 0.002907 |

|          |     |                   |                    |                                       |                                             |    |       |                     |                         |          |
|----------|-----|-------------------|--------------------|---------------------------------------|---------------------------------------------|----|-------|---------------------|-------------------------|----------|
| 105_c3-1 | 105 | KDR               | MODERATE           | c.1699G>A                             | p.Val567Met                                 | 1  | FALSE | chr4:55971098:C:T   | 207:chr4:55971098:C:T   | 0.002591 |
| 105_c3-1 | 105 | ATM               | MODERATE           | c.2576A>T                             | p.Asn859Ile                                 | 0  | FALSE | chr11:108138007:A:T | 207:chr11:108138007:A:T | 0.002688 |
| 105_c3-1 | 105 | FBXW7             | MODERATE           | c.1225G>A;<br>c.1339G>A;<br>c.1579G>A | p.Asp409Asn;<br>p.Asp447Asn;<br>p.Asp527Asn | 0  | FALSE | chr4:153247223:C:T  | 207:chr4:153247223:C:T  | 0.003155 |
| 105_c3-1 | 105 | ESR1              | MODERATE           | c.739G>A;<br>c.745G>A                 | p.Glu247Lys;<br>p.Glu249Lys                 | 0  | FALSE | chr6:152201885:G:A  | 207:chr6:152201885:G:A  | 0.004464 |
| 105_c3-1 | 105 | PIK3CA            | MODERATE           | c.3109G>A                             | p.Glu1037Lys                                | 2  | FALSE | chr3:178952054:G:A  | 207:chr3:178952054:G:A  | 0.002564 |
| 105_c3-1 | 105 | DDR2              | HIGH               | c.2258G>A                             | p.Trp753*                                   | 1  | FALSE | chr1:162746135:G:A  | 207:chr1:162746135:G:A  | 0.00243  |
| 105_c3-1 | 105 | EGFR;<br>EGFR-AS1 | MODERATE; MODIFIER | c.2561C>T;<br>n.-1G>A                 | p.Thr854Ile;                                | 1  | FALSE | chr7:55259503:C:T   | 207:chr7:55259503:C:T   | 0.002874 |
| 105_c3-1 | 105 | BRAF              | HIGH               | c.1349G>A                             | p.Trp450*                                   | 1  | FALSE | chr7:140481459:C:T  | 207:chr7:140481459:C:T  | 0.002372 |
| 105_c3-1 | 105 | ATM               | HIGH               | c.4852C>T                             | p.Arg1618*                                  | 0  | FALSE | chr11:108165729:C:T | 207:chr11:108165729:C:T | 0.002699 |
| 105_c3-1 | 105 | BRAF              | MODERATE           | c.2083G>A                             | p.Glu695Lys                                 | 2  | FALSE | chr7:140439656:C:T  | 207:chr7:140439656:C:T  | 0.002825 |
| 105_c3-1 | 105 | TSC1              | MODERATE           | c.2677G>A;<br>c.2827G>A;<br>c.2830G>A | p.Ala893Thr;<br>p.Ala943Thr;<br>p.Ala944Thr | 0  | FALSE | chr9:135772716:C:T  | 207:chr9:135772716:C:T  | 0.003077 |
| 105_c3-1 | 105 | PDGFRA            | MODERATE           | c.685G>A                              | p.Glu229Lys                                 | 3  | FALSE | chr4:55131142:G:A   | 207:chr4:55131142:G:A   | 0.002778 |
| 105_c3-1 | 105 | KIT               | MODERATE           | c.1648G>A;<br>c.1660G>A               | p.Glu550Lys;<br>p.Glu554Lys                 | 3  | FALSE | chr4:55593594:G:A   | 207:chr4:55593594:G:A   | 0.002829 |
| 105_c3-1 | 105 | AKT3              | HIGH               | c.1324C>T                             | p.Gln442*                                   | 0  | FALSE | chr1:243675656:G:A  | 207:chr1:243675656:G:A  | 0.00316  |
| 105_c3-1 | 105 | MET               | MODERATE           | c.3583C>T;<br>c.3637C>T               | p.Leu1195Phe;<br>p.Leu1213Phe               | 1  | FALSE | chr7:116422102:C:T  | 207:chr7:116422102:C:T  | 0.002717 |
| 105_c3-1 | 105 | PTEN              | MODERATE           | c.724G>A                              | p.Glu242Lys                                 | 2  | FALSE | chr10:89717699:G:A  | 207:chr10:89717699:G:A  | 0.004071 |
| 105_c3-1 | 105 | BRAF              | MODERATE           | c.1781A>G                             | p.Asp594Gly                                 | 59 | FALSE | chr7:140453154:T:C  | 207:chr7:140453154:T:C  | 0.009563 |

|         |    |                 |                    |                                                         |                                                     |     |       |                        |                                |          |
|---------|----|-----------------|--------------------|---------------------------------------------------------|-----------------------------------------------------|-----|-------|------------------------|--------------------------------|----------|
| 61_c4-1 | 61 | KIT             | MODERATE           | c.2329G>A;<br>; c.2341G>A                               | p.Ala777Thr<br>; p.Ala781Thr                        | 1   | FALSE | chr4:5559<br>8144:G:A  | 209:chr4:5<br>5598144:G<br>:A  | 0.004926 |
| 61_c4-1 | 61 | ESR1            | MODERATE; HIGH     | c.643G>T                                                | p.Gly215Cys<br>; p.Gly215*                          | 0   | FALSE | chr6:1521<br>63922:G:T | 209:chr6:1<br>52163922:<br>G:T | 0.004444 |
| 61_c4-1 | 61 | IDH2;<br>ZNF710 | MODERATE; MODIFIER | c.1091C>T;<br>c.1247C>T;<br>c.857C>T;<br>c.*2147G><br>A | p.Ala364Val;<br>p.Ala416Val;<br>p.Ala286Val;        | 1   | FALSE | chr15:906<br>28072:G:A | 209:chr15:<br>90628072:<br>G:A | 0.00551  |
| 61_c4-1 | 61 | FGFR3           | MODIFIER; MODERATE | c.931-<br>374G>A;<br>; c.1196G>A<br>;<br>c.1202G>A      | p.Arg399His<br>;<br>p.Arg401His                     | 1   | FALSE | chr4:1806<br>177:G:A   | 209:chr4:1<br>806177:G:<br>A   | 0.007067 |
| 61_c4-1 | 61 | KIT             | MODERATE           | c.365G>A                                                | p.Arg122His                                         | 1   | FALSE | chr4:5556<br>4477:G:A  | 209:chr4:5<br>5564477:G<br>:A  | 0.007335 |
| 61_c4-1 | 61 | RET             | MODERATE           | c.2038G>A                                               | p.Ala680Thr                                         | 1   | FALSE | chr10:436<br>10086:G:A | 209:chr10:<br>43610086:<br>G:A | 0.003676 |
| 61_c4-1 | 61 | TP53            | HIGH; MODIFIER     | c.181C>T;<br>c.298C>T;<br>c.-279C>T;<br>c.-360C>T       | p.Gln61*;<br>p.Gln100*;                             | 16  | FALSE | chr17:757<br>9389:G:A  | 209:chr17:<br>7579389:G<br>:A  | 0.029508 |
| 61_c4-1 | 61 | ESR1            | MODERATE           | c.719G>A;<br>c.725G>A                                   | p.Cys240Tyr<br>;<br>p.Cys242Tyr                     | 0   | FALSE | chr6:1522<br>01865:G:A | 209:chr6:1<br>52201865:<br>G:A | 0.004008 |
| 61_c4-1 | 61 | PTEN            | HIGH               | c.822G>A                                                | p.Trp274*                                           | 3   | FALSE | chr10:897<br>20671:G:A | 209:chr10:<br>89720671:<br>G:A | 0.016461 |
| 61_c4-1 | 61 | NTRK2           | MODERATE           | c.407G>A                                                | p.Arg136His                                         | 0   | FALSE | chr9:8732<br>2806:G:A  | 209:chr9:8<br>7322806:G<br>:A  | 0.006494 |
| 61_c4-1 | 61 | FBXW7           | MODERATE           | c.1160G>A<br>;<br>c.1274G>A<br>;<br>c.1514G>A           | p.Arg387His<br>;<br>p.Arg425His<br>;<br>p.Arg505His | 0   | FALSE | chr4:1532<br>47288:C:T | 209:chr4:1<br>53247288:<br>C:T | 0.004065 |
| 61_c4-1 | 61 | MAP2K1          | MODERATE           | c.146G>A                                                | p.Arg49His                                          | 1   | FALSE | chr15:667<br>27430:G:A | 209:chr15:<br>66727430:<br>G:A | 0.004141 |
| 61_c4-1 | 61 | TP53            | MODIFIER; MODERATE | c.-9G>A;<br>; c.352G>A;<br>c.469G>A;<br>c.73G>A         | p.Val118Ile;<br>p.Val157Ile;<br>p.Val25Ile          | 169 | FALSE | chr17:757<br>8461:C:T  | 209:chr17:<br>7578461:C<br>:T  | 0.004405 |

|          |     |        |          |                                                    |                                                           |       |       |                        |                                |          |
|----------|-----|--------|----------|----------------------------------------------------|-----------------------------------------------------------|-------|-------|------------------------|--------------------------------|----------|
| 61_c4-1  | 61  | PIK3R1 | HIGH     | c.1494C>A;<br>; c.405C>A;<br>c.594C>A;<br>c.684C>A | p.Cys498*;<br>p.Cys135*;<br>p.Cys198*;<br>p.Cys228*       | 1     | FALSE | chr5:6759<br>0432:C:A  | 209:chr5:6<br>7590432:C<br>:A  | 0.004785 |
| 61_c4-1  | 61  | MAP2K1 | MODERATE | c.383G>A                                           | p.Gly128Asp                                               | 3     | FALSE | chr15:667<br>29175:G:A | 209:chr15:<br>66729175:<br>G:A | 0.00597  |
| 61_c4-1  | 61  | TSC2   | MODERATE | c.721G>A                                           | p.Val241Ile                                               | 0     | FALSE | chr16:210<br>6717:G:A  | 209:chr16:<br>2106717:G<br>:A  | 0.005405 |
| 61_c4-1  | 61  | EPHA3  | MODERATE | c.1916G>A                                          | p.Arg639His                                               | 0     | FALSE | chr3:8946<br>8382:G:A  | 209:chr3:8<br>9468382:G<br>:A  | 0.007407 |
| 61_c4-1  | 61  | HGF    | MODERATE | c.294G>T                                           | p.Trp98Cys                                                | 0     | FALSE | chr7:8138<br>8081:C:A  | 209:chr7:8<br>1388081:C<br>:A  | 0.004525 |
| 61_c4-1  | 61  | BRAF   | MODERATE | c.1799T>A                                          | p.Val600Glu                                               | 23024 | FALSE | chr7:1404<br>53136:A:T | 209:chr7:1<br>40453136:<br>A:T | 0.346582 |
| 61_c4-1  | 61  | PTEN   | MODERATE | c.283C>T                                           | p.Pro95Ser                                                | 3     | FALSE | chr10:896<br>92799:C:T | 209:chr10:<br>89692799:<br>C:T | 0.017722 |
| 105_bl-1 | 105 | EPHA3  | MODERATE | c.545C>T                                           | p.Ala182Val                                               | 0     | FALSE | chr3:8925<br>9401:C:T  | 210:chr3:8<br>9259401:C<br>:T  | 0.003125 |
| 105_bl-1 | 105 | IGF1R  | MODERATE | c.3905T>C;<br>c.3908T>C                            | p.Val1302Ala;<br>p.Val1303Ala                             | 0     | FALSE | chr15:995<br>00475:T:C | 210:chr15:<br>99500475:<br>T:C | 0.004695 |
| 105_bl-1 | 105 | RPL19  | MODERATE | c.452G>A                                           | p.Arg151His                                               | 0     | FALSE | chr17:373<br>60425:G:A | 210:chr17:<br>37360425:<br>G:A | 0.003731 |
| 105_bl-1 | 105 | FGFR3  | MODERATE | c.796G>A                                           | p.Val266Met                                               | 1     | FALSE | chr4:1803<br>618:G:A   | 210:chr4:1<br>803618:G:<br>A   | 0.011494 |
| 105_bl-1 | 105 | TSC1   | HIGH     | c.1921C>T;<br>c.2071C>T;<br>c.2074C>T              | p.Arg641*;<br>p.Arg691*;<br>p.Arg692*                     | 0     | FALSE | chr9:1357<br>79172:G:A | 210:chr9:1<br>35779172:<br>G:A | 0.002837 |
| 105_bl-1 | 105 | EGFR   | MODERATE | c.739G>A                                           | p.Asp247Asn                                               | 1     | FALSE | chr7:5522<br>0349:G:A  | 210:chr7:5<br>5220349:G<br>:A  | 0.003945 |
| 105_bl-1 | 105 | ALK    | MODERATE | c.4192C>T                                          | p.Pro1398Ser                                              | 1     | FALSE | chr2:2941<br>6761:G:A  | 210:chr2:2<br>9416761:G<br>:A  | 0.005051 |
| 105_bl-1 | 105 | CTNNB1 | MODERATE | c.1346G>A                                          | p.Arg449His                                               | 0     | FALSE | chr3:4127<br>5180:G:A  | 210:chr3:4<br>1275180:G<br>:A  | 0.002478 |
| 105_bl-1 | 105 | TP53   | MODERATE | c.170C>T;<br>c.449C>T;<br>c.566C>T;<br>c.89C>T     | p.Ala57Val;<br>p.Ala150Val;<br>p.Ala189Val;<br>p.Ala30Val | 4     | FALSE | chr17:757<br>8283:G:A  | 210:chr17:<br>7578283:G<br>:A  | 0.004511 |

|          |     |                   |                    |                                                 |                                                                         |     |       |                        |                                |          |
|----------|-----|-------------------|--------------------|-------------------------------------------------|-------------------------------------------------------------------------|-----|-------|------------------------|--------------------------------|----------|
| 105_bl-1 | 105 | TSC1              | MODERATE           | c.1547C>T;<br>c.1697C>T;<br>c.1700C>T           | p.Ala516Val;<br>p.Ala566Val;<br>p.Ala567Val                             | 0   | FALSE | chr9:1357<br>81265:G:A | 210:chr9:1<br>35781265:<br>G:A | 0.002525 |
| 105_bl-1 | 105 | FBXW7             | MODERATE           | c.1160G>A<br>;<br>c.1274G>A<br>;<br>c.1514G>A   | p.Arg387His<br>;<br>p.Arg425His<br>;<br>p.Arg505His                     | 0   | FALSE | chr4:1532<br>47288:C:T | 210:chr4:1<br>53247288:<br>C:T | 0.00274  |
| 105_bl-1 | 105 | EGFR;<br>EGFR-AS1 | MODERATE; MODIFIER | c.2495G>A<br>; n.-1C>T                          | p.Arg832His<br>;                                                        | 2   | FALSE | chr7:5525<br>9437:G:A  | 210:chr7:5<br>5259437:G<br>:A  | 0.003436 |
| 105_bl-1 | 105 | CDKN2A            | MODIFIER; MODERATE | c.194-<br>3470G>T;<br>c.150G>T                  | ; p.Gln50His                                                            | 1   | FALSE | chr9:2197<br>4677:C:A  | 210:chr9:2<br>1974677:C<br>:A  | 0.003431 |
| 105_bl-1 | 105 | PDGFRA            | MODERATE           | c.1495G>A                                       | p.Val499Me<br>t                                                         | 2   | FALSE | chr4:5513<br>9834:G:A  | 210:chr4:5<br>5139834:G<br>:A  | 0.003322 |
| 105_bl-1 | 105 | CDH1              | MODERATE           | c.781G>A                                        | p.Glu261Lys                                                             | 0   | FALSE | chr16:688<br>44193:G:A | 210:chr16:<br>68844193:<br>G:A | 0.003044 |
| 105_bl-1 | 105 | PTEN              | HIGH               | c.822G>A                                        | p.Trp274*                                                               | 3   | FALSE | chr10:897<br>20671:G:A | 210:chr10:<br>89720671:<br>G:A | 0.005602 |
| 105_bl-1 | 105 | FGFR4             | MODERATE           | c.1246G>A<br>;<br>c.1330G>A<br>;<br>c.1450G>A   | p.Ala416Thr<br>;<br>p.Ala444Thr<br>;<br>p.Ala484Thr                     | 1   | FALSE | chr5:1765<br>20707:G:A | 210:chr5:1<br>76520707:<br>G:A | 0.003017 |
| 105_bl-1 | 105 | EGFR;<br>EGFR-AS1 | MODERATE; MODIFIER | c.2303G>A<br>;<br>n.1259C>T                     | p.Ser768Asn<br>;                                                        | 37  | FALSE | chr7:5524<br>9005:G:A  | 210:chr7:5<br>5249005:G<br>:A  | 0.002445 |
| 105_bl-1 | 105 | HGF               | HIGH               | c.517C>T;<br>c.532C>T                           | p.Arg173*;<br>p.Arg178*                                                 | 0   | FALSE | chr7:8138<br>1529:G:A  | 210:chr7:8<br>1381529:G<br>:A  | 0.003077 |
| 105_bl-1 | 105 | TP53              | MODERATE           | c.341G>A;<br>c.422G>A;<br>c.701G>A;<br>c.818G>A | p.Arg114His<br>;<br>p.Arg141His<br>;<br>p.Arg234His<br>;<br>p.Arg273His | 647 | TRUE  | chr17:757<br>7120:C:T  | 210:chr17:<br>7577120:C<br>:T  | 0.003328 |
| 105_bl-1 | 105 | BRAF              | MODERATE           | c.1781A>G                                       | p.Asp594Gly                                                             | 59  | FALSE | chr7:1404<br>53154:T:C | 210:chr7:1<br>40453154:<br>T:C | 0.003442 |
| 105_bl-1 | 105 | APC               | MODIFIER; MODERATE | c.676-<br>8791C>T;<br>c.688C>T                  | ; p.Arg230Cys                                                           | 0   | FALSE | chr5:1121<br>28185:C:T | 210:chr5:1<br>12128185:<br>C:T | 0.003591 |

|          |     |                            |                            |                                                                                                                      |                                                                         |    |       |                             |                                 |          |
|----------|-----|----------------------------|----------------------------|----------------------------------------------------------------------------------------------------------------------|-------------------------------------------------------------------------|----|-------|-----------------------------|---------------------------------|----------|
| 105_bl-1 | 105 | TP53                       | MODERATE                   | c.322C>T;<br>c.403C>T;<br>c.682C>T;<br>c.799C>T                                                                      | p.Arg108Trp<br>;<br>p.Arg135Trp<br>;<br>p.Arg228Trp<br>;<br>p.Arg267Trp | 31 | FALSE | chr17:757<br>7139:G:A       | 210:chr17:<br>7577139:G<br>:A   | 0.004348 |
| 105_bl-1 | 105 | FGFR2                      | MODIFIER; LOW; HIGH        | c.749-<br>4848C>T;<br>n.1053C>T<br>; c.406C>T;<br>c.484C>T;<br>c.751C>T                                              | p.Arg136*;<br>p.Arg162*;<br>p.Arg251*                                   | 2  | FALSE | chr10:123<br>279681:G:<br>A | 210:chr10:<br>12327968<br>1:G:A | 0.003929 |
| 105_bl-1 | 105 | MET                        | MODERATE                   | c.1640G>A                                                                                                            | p.Arg547Gln                                                             | 1  | FALSE | chr7:1163<br>81018:G:A      | 210:chr7:1<br>16381018:<br>G:A  | 0.002141 |
| 105_bl-1 | 105 | PIK3R1                     | LOW; MODIFIER              | c.1017G>A<br>;<br>c.117G>A;<br>c.207G>A;<br>c.-233G>A                                                                | p.Ser339Ser<br>; p.Ser39Ser;<br>p.Ser69Ser;                             | 1  | FALSE | chr5:6758<br>8187:G:A       | 210:chr5:6<br>7588187:G<br>:A   | 0.00321  |
| 105_bl-1 | 105 | NOTCH1                     | MODERATE                   | c.4549G>A                                                                                                            | p.Asp1517A<br>sn                                                        | 0  | FALSE | chr9:1393<br>99799:C:T      | 210:chr9:1<br>39399799:<br>C:T  | 0.003527 |
| 105_bl-1 | 105 | GAPDH;<br>IFFO1;<br>NCAPD2 | MODERATE; MODIFIER         | c.157G>A;<br>c.283G>A;<br>c.*1743C><br>T;<br>c.*1746C><br>T;<br>c.*1770C><br>T;<br>n.*2798C><br>T;<br>c.*4252G><br>A | p.Val53Ile;<br>p.Val95Ile;                                              | 0  | FALSE | chr12:664<br>6132:G:A       | 210:chr12:<br>6646132:G<br>:A   | 0.004008 |
| 105_bl-1 | 105 | AR                         | MODERATE                   | c.2360G>A<br>; c.764G>A                                                                                              | p.Arg787Gln<br>;<br>p.Arg255Gln                                         | 0  | FALSE | chrX:6694<br>1716:G:A       | 210:chrX:6<br>6941716:G<br>:A   | 0.002797 |
| 105_bl-1 | 105 | C9orf53;<br>CDKN2A         | MODIFIER; MODERATE;<br>LOW | n.*616G>A<br>;<br>c.*165C>T;<br>; c.242C>T;<br>c.285C>T                                                              | p.Pro81Leu;<br>p.Thr95Thr                                               | 9  | FALSE | chr9:2197<br>1116:G:A       | 210:chr9:2<br>1971116:G<br>:A   | 0.004963 |
| 105_bl-1 | 105 | MAP2K1                     | MODERATE                   | c.140G>A                                                                                                             | p.Arg47Gln                                                              | 4  | FALSE | chr15:667<br>27424:G:A      | 210:chr15:<br>66727424:<br>G:A  | 0.003044 |

|          |     |                    |                    |                                                                                  |                                                                                        |    |       |                        |                                |          |
|----------|-----|--------------------|--------------------|----------------------------------------------------------------------------------|----------------------------------------------------------------------------------------|----|-------|------------------------|--------------------------------|----------|
| 105_bl-1 | 105 | IDH2;<br>ZNF710    | MODERATE; MODIFIER | c.1091C>T;<br>c.1247C>T;<br>c.857C>T;<br>c.*2147G><br>A                          | p.Ala364Val;<br>p.Ala416Val;<br>p.Ala286Val;                                           | 1  | FALSE | chr15:906<br>28072:G:A | 210:chr15:<br>90628072:<br>G:A | 0.003509 |
| 105_bl-1 | 105 | NOTCH1             | MODERATE           | c.4918G>A                                                                        | p.Ala1640Th<br>r                                                                       | 0  | FALSE | chr9:1393<br>99225:C:T | 210:chr9:1<br>39399225:<br>C:T | 0.004158 |
| 105_bl-1 | 105 | RET                | MODERATE           | c.1438G>A                                                                        | p.Glu480Lys                                                                            | 1  | FALSE | chr10:436<br>06829:G:A | 210:chr10:<br>43606829:<br>G:A | 0.002813 |
| 105_bl-1 | 105 | IGF1R              | MODERATE           | c.3622G>A<br>;<br>c.3625G>A                                                      | p.Ala1208Th<br>r;<br>p.Ala1209Th<br>r                                                  | 0  | FALSE | chr15:994<br>91840:G:A | 210:chr15:<br>99491840:<br>G:A | 0.003284 |
| 105_bl-1 | 105 | C9orf53;<br>CDKN2A | MODIFIER; MODERATE | n.*616G>A<br>;<br>c.*318C>T;<br>c.*39C>T;<br>c.395C>T                            | p.Ala132Val                                                                            | 1  | FALSE | chr9:2197<br>0963:G:A  | 210:chr9:2<br>1970963:G<br>:A  | 0.004484 |
| 105_bl-1 | 105 | TP53               | MODERATE           | c.347G>T;<br>c.428G>T;<br>c.707G>T;<br>c.824G>T                                  | p.Cys116Ph<br>e;<br>p.Cys143Ph<br>e;<br>p.Cys236Ph<br>e;<br>p.Cys275Ph<br>e            | 57 | FALSE | chr17:757<br>7114:C:A  | 210:chr17:<br>7577114:C<br>:A  | 0.003215 |
| 105_bl-1 | 105 | ZNF716             | MODERATE           | c.241G>A                                                                         | p.Glu81Lys                                                                             | 0  | FALSE | chr7:5752<br>2853:G:A  | 210:chr7:5<br>7522853:G<br>:A  | 0.00295  |
| 105_bl-1 | 105 | PTEN               | MODERATE           | c.392C>A                                                                         | p.Thr131Asn                                                                            | 2  | FALSE | chr10:896<br>92908:C:A | 210:chr10:<br>89692908:<br>C:A | 0.003106 |
| 106_bl-1 | 106 | EGFR;<br>EGFR-AS1  | MODERATE; MODIFIER | c.2387G>A<br>;<br>n.1175C>T                                                      | p.Gly796Asp<br>;                                                                       | 3  | FALSE | chr7:5524<br>9089:G:A  | 211:chr7:5<br>5249089:G<br>:A  | 0.002165 |
| 106_bl-1 | 106 | MITF               | MODIFIER; MODERATE | c.93+115G<br>>A;<br>c.208G>A;<br>c.373G>A;<br>c.481G>A;<br>c.526G>A;<br>c.529G>A | p.Ala70Thr;<br>p.Ala125Thr<br>;<br>p.Ala161Thr<br>;<br>p.Ala176Thr<br>;<br>p.Ala177Thr | 0  | FALSE | chr3:6998<br>7147:G:A  | 211:chr3:6<br>9987147:G<br>:A  | 0.002782 |
| 106_bl-1 | 106 | DDR2               | MODERATE           | c.1418G>A                                                                        | p.Arg473His                                                                            | 2  | FALSE | chr1:1627<br>40216:G:A | 211:chr1:1<br>62740216:<br>G:A | 0.003521 |
| 106_bl-1 | 106 | MAP2K1             | MODERATE           | c.145C>T                                                                         | p.Arg49Cys                                                                             | 1  | FALSE | chr15:667<br>27429:C:T | 211:chr15:<br>66727429:<br>C:T | 0.002356 |



|          |     |                    |                    |                                                                                 |                                                                                        |    |       |                        |                                |          |
|----------|-----|--------------------|--------------------|---------------------------------------------------------------------------------|----------------------------------------------------------------------------------------|----|-------|------------------------|--------------------------------|----------|
| 106_bl-1 | 106 | TP53               | MODERATE           | c.236G>A;<br>c.317G>A;<br>c.596G>A;<br>c.713G>A                                 | p.Cys79Tyr;<br>p.Cys106Tyr<br>;<br>p.Cys199Tyr<br>;<br>p.Cys238Tyr                     | 74 | FALSE | chr17:757<br>7568:C:T  | 211:chr17:<br>7577568:C<br>:T  | 0.001866 |
| 106_bl-1 | 106 | C9orf53;<br>CDKN2A | MODIFIER; MODERATE | n.*616G>A<br>;<br>c.*318C>T;<br>c.*39C>T;<br>c.395C>T                           | p.Ala132Val                                                                            | 1  | FALSE | chr9:2197<br>0963:G:A  | 211:chr9:2<br>1970963:G<br>:A  | 0.002841 |
| 106_bl-1 | 106 | MITF               | MODIFIER; MODERATE | c.93+61C><br>T;<br>c.154C>T;<br>c.319C>T;<br>c.427C>T;<br>c.472C>T;<br>c.475C>T | p.Pro52Ser;<br>p.Pro107Ser<br>;<br>p.Pro143Ser<br>;<br>p.Pro158Ser<br>;<br>p.Pro159Ser | 0  | FALSE | chr3:6998<br>7093:C:T  | 211:chr3:6<br>9987093:C<br>:T  | 0.002692 |
| 106_bl-1 | 106 | FGFR3              | MODERATE           | c.599G>A                                                                        | p.Arg200His                                                                            | 1  | FALSE | chr4:1803<br>247:G:A   | 211:chr4:1<br>803247:G:<br>A   | 0.003344 |
| 106_bl-1 | 106 | C9orf53;<br>CDKN2A | MODIFIER; MODERATE | n.*616C>T<br>;<br>c.*176G>A<br>;<br>c.253G>A;<br>c.296G>A                       | p.Ala85Thr;<br>p.Arg99His                                                              | 1  | FALSE | chr9:2197<br>1105:C:T  | 211:chr9:2<br>1971105:C<br>:T  | 0.003263 |
| 106_bl-1 | 106 | EGFR               | MODERATE           | c.1789G>A                                                                       | p.Ala597Thr                                                                            | 1  | FALSE | chr7:5523<br>3039:G:A  | 211:chr7:5<br>5233039:G<br>:A  | 0.003992 |
| 106_bl-1 | 106 | MIR4673;<br>NOTCH1 | MODIFIER; MODERATE | n.*59G>A;<br>c.1058G>A                                                          | p.Arg353His                                                                            | 0  | FALSE | chr9:1394<br>13084:C:T | 211:chr9:1<br>39413084:<br>C:T | 0.002688 |
| 106_bl-1 | 106 | PDGFRA             | MODERATE           | c.703T>C                                                                        | p.Cys235Arg                                                                            | 1  | FALSE | chr4:5513<br>1160:T:C  | 211:chr4:5<br>5131160:T<br>:C  | 0.004367 |
| 106_bl-1 | 106 | TSC2               | MODIFIER; MODERATE | c.2837+11<br>08G>A;<br>c.2933G>A                                                | p.Arg978His                                                                            | 0  | FALSE | chr16:212<br>7694:G:A  | 211:chr16:<br>2127694:G<br>:A  | 0.002361 |
| 106_bl-1 | 106 | AKT3               | MODERATE           | c.899C>T                                                                        | p.Ala300Val                                                                            | 0  | FALSE | chr1:2437<br>27071:G:A | 211:chr1:2<br>43727071:<br>G:A | 0.002574 |

|          |     |                    |                            |                                                                              |                                                               |       |       |                             |                                 |          |
|----------|-----|--------------------|----------------------------|------------------------------------------------------------------------------|---------------------------------------------------------------|-------|-------|-----------------------------|---------------------------------|----------|
| 106_bl-1 | 106 | TP53               | MODERATE                   | c.134A>G;<br>c.215A>G;<br>c.494A>G;<br>c.611A>G                              | p.Glu45Gly;<br>p.Glu72Gly;<br>p.Glu165Gly<br>;<br>p.Glu204Gly | 3     | FALSE | chr17:757<br>8238:T:C       | 211:chr17:<br>7578238:T<br>:C   | 0.002181 |
| 106_bl-1 | 106 | STK11              | HIGH                       | c.409C>T                                                                     | p.Gln137*                                                     | 1     | FALSE | chr19:121<br>9357:C:T       | 211:chr19:<br>1219357:C<br>:T   | 0.002857 |
| 106_bl-1 | 106 | KRAS               | MODERATE                   | c.35G>A                                                                      | p.Gly12Asp                                                    | 11213 | FALSE | chr12:253<br>98284:C:T      | 211:chr12:<br>25398284:<br>C:T  | 0.010152 |
| 106_bl-1 | 106 | NTRK2              | MODERATE                   | c.1984G>A<br>;<br>c.2032G>A                                                  | p.Ala662Thr<br>;<br>p.Ala678Thr                               | 0     | FALSE | chr9:8757<br>0292:G:A       | 211:chr9:8<br>7570292:G<br>:A   | 0.002404 |
| 106_bl-1 | 106 | NTRK2              | MODERATE                   | c.2024G>A<br>;<br>c.2072G>A                                                  | p.Arg675His<br>;<br>p.Arg691His                               | 0     | FALSE | chr9:8757<br>0332:G:A       | 211:chr9:8<br>7570332:G<br>:A   | 0.002304 |
| 106_bl-1 | 106 | NTRK1              | MODERATE                   | c.1853G>A<br>;<br>c.1943G>A<br>;<br>c.1961G>A                                | p.Arg618His<br>;<br>p.Arg648His<br>;<br>p.Arg654His           | 3     | FALSE | chr1:1568<br>49069:G:A      | 211:chr1:1<br>56849069:<br>G:A  | 0.002915 |
| 106_bl-1 | 106 | FGFR2              | MODIFIER; MODERATE         | c.110-<br>1053G>A;<br>c.110-<br>14173G>A;<br>n.757-<br>14173G>A;<br>c.182G>A | p.Arg61His                                                    | 1     | FALSE | chr10:123<br>325146:C:<br>T | 211:chr10:<br>12332514<br>6:C:T | 0.002226 |
| 106_bl-1 | 106 | ATM                | MODERATE                   | c.2075G>A                                                                    | p.Arg692His                                                   | 0     | FALSE | chr11:108<br>124717:G:<br>A | 211:chr11:<br>10812471<br>7:G:A | 0.002203 |
| 106_bl-1 | 106 | PIK3CA             | MODERATE                   | c.1235G>A                                                                    | p.Arg412Gln                                                   | 1     | FALSE | chr3:1789<br>27472:G:A      | 211:chr3:1<br>78927472:<br>G:A  | 0.002729 |
| 106_bl-1 | 106 | C9orf53;<br>CDKN2A | MODIFIER; MODERATE;<br>LOW | n.*616G>A<br>;<br>c.*175C>T;<br>c.295C>T;<br>c.252C>T                        | p.Arg99Cys;<br>p.Asp84Asp                                     | 3     | FALSE | chr9:2197<br>1106:G:A       | 211:chr9:2<br>1971106:G<br>:A   | 0.003257 |
| 106_bl-1 | 106 | TSC1               | MODERATE                   | c.169G>A                                                                     | p.Ala57Thr                                                    | 0     | FALSE | chr9:1358<br>02629:C:T      | 211:chr9:1<br>35802629:<br>C:T  | 0.002132 |
| 106_bl-1 | 106 | MIR4673;<br>NOTCH1 | MODIFIER; MODERATE         | n.*59G>A;<br>c.1024G>A                                                       | p.Ala342Thr                                                   | 0     | FALSE | chr9:1394<br>13118:C:T      | 211:chr9:1<br>39413118:<br>C:T  | 0.002646 |
| 106_bl-1 | 106 | TSC2               | MODERATE                   | c.3289G>A<br>;<br>c.3421G>A                                                  | p.Ala1097Th<br>r;<br>p.Ala1141Th<br>r                         | 0     | FALSE | chr16:213<br>0189:G:A       | 211:chr16:<br>2130189:G<br>:A   | 0.002817 |

|          |     |                    |                            |                                                   |                                                             |    |       |                    |                        |          |
|----------|-----|--------------------|----------------------------|---------------------------------------------------|-------------------------------------------------------------|----|-------|--------------------|------------------------|----------|
| 106_bl-1 | 106 | PTEN               | HIGH                       | c.822G>A                                          | p.Trp274*                                                   | 3  | FALSE | chr10:89720671:G:A | 211:chr10:89720671:G:A | 0.004854 |
| 106_bl-1 | 106 | TP53               | MODIFIER; MODERATE         | c.-17C>T;<br>c.-98C>T;<br>c.263C>T;<br>c.380C>T   | p.Ser88Phe;<br>p.Ser127Phe                                  | 38 | FALSE | chr17:7578550:G:A  | 211:chr17:7578550:G:A  | 0.003018 |
| 106_bl-1 | 106 | NTRK1              | MODERATE                   | c.1039C>T;<br>c.949C>T                            | p.Arg347Cys;<br>p.Arg317Cys                                 | 1  | FALSE | chr1:156843613:C:T | 211:chr1:156843613:C:T | 0.002055 |
| 106_bl-1 | 106 | TSC1               | MODERATE                   | c.365C>T;<br>c.518C>T                             | p.Ala122Val;<br>p.Ala173Val                                 | 0  | FALSE | chr9:135797351:G:A | 211:chr9:135797351:G:A | 0.004249 |
| 106_bl-1 | 106 | TP53               | MODERATE                   | c.371G>A;<br>c.452G>A;<br>c.731G>A;<br>c.848G>A   | p.Arg124His;<br>p.Arg151His;<br>p.Arg244His;<br>p.Arg283His | 24 | FALSE | chr17:7577090:C:T  | 211:chr17:7577090:C:T  | 0.002535 |
| 106_bl-1 | 106 | ESR1               | MODERATE                   | c.719G>A;<br>c.725G>A                             | p.Cys240Tyr;<br>p.Cys242Tyr                                 | 0  | FALSE | chr6:152201865:G:A | 211:chr6:152201865:G:A | 0.002088 |
| 106_bl-1 | 106 | NF1                | MODERATE                   | c.5426G>A;<br>c.5489G>A                           | p.Arg1809His;<br>p.Arg1830His                               | 1  | FALSE | chr17:29654737:G:A | 211:chr17:29654737:G:A | 0.001757 |
| 106_bl-1 | 106 | NTRK3              | MODERATE                   | c.1351C>T;<br>c.1375C>T                           | p.Arg451Trp;<br>p.Arg459Trp                                 | 0  | FALSE | chr15:88669523:G:A | 211:chr15:88669523:G:A | 0.003708 |
| 106_bl-1 | 106 | ERBB2              | MODERATE; MODIFIER         | c.560G>A;<br>c.605G>A;<br>c.650G>A;<br>n.974G>A   | p.Arg187His;<br>p.Arg202His;<br>p.Arg217His                 | 1  | FALSE | chr17:37866345:G:A | 211:chr17:37866345:G:A | 0.002418 |
| 106_bl-1 | 106 | EGFR;<br>EGFR-AS1  | MODERATE; MODIFIER         | c.2516C>T;<br>n.-1G>A                             | p.Ala839Val;                                                | 1  | FALSE | chr7:55259458:C:T  | 211:chr7:55259458:C:T  | 0.002415 |
| 106_bl-1 | 106 | EPHA3              | MODERATE                   | c.2242G>A                                         | p.Ala748Thr                                                 | 0  | FALSE | chr3:89480405:G:A  | 211:chr3:89480405:G:A  | 0.002759 |
| 106_bl-1 | 106 | ALK                | MODERATE                   | c.871C>T                                          | p.Arg291Cys                                                 | 3  | FALSE | chr2:29917797:G:A  | 211:chr2:29917797:G:A  | 0.00206  |
| 106_bl-1 | 106 | C9orf53;<br>CDKN2A | MODIFIER; MODERATE;<br>LOW | n.*616C>T;<br>c.*258G>A;<br>c.335G>A;<br>c.378G>A | p.Arg112His;<br>p.Pro126Pro                                 | 1  | FALSE | chr9:21971023:C:T  | 211:chr9:21971023:C:T  | 0.003058 |

|          |     |        |                     |                                                  |                                             |       |       |                        |                                |          |
|----------|-----|--------|---------------------|--------------------------------------------------|---------------------------------------------|-------|-------|------------------------|--------------------------------|----------|
| 106_bl-1 | 106 | ALK    | MODERATE            | c.446C>T                                         | p.Ala149Val                                 | 1     | FALSE | chr2:3014<br>3080:G:A  | 211:chr2:3<br>0143080:G<br>:A  | 0.003916 |
| 106_bl-1 | 106 | MET    | MODERATE            | c.2067C>A                                        | p.His689Gln                                 | 3     | FALSE | chr7:1163<br>97793:C:A | 211:chr7:1<br>16397793:<br>C:A | 0.003026 |
| 106_bl-1 | 106 | FGFR3  | MODERATE            | c.743G>A                                         | p.Arg248His                                 | 2     | FALSE | chr4:1803<br>565:G:A   | 211:chr4:1<br>803565:G:<br>A   | 0.004751 |
| 106_bl-1 | 106 | IGF1R  | MODERATE            | c.719G>A                                         | p.Ser240Asn                                 | 0     | FALSE | chr15:994<br>34632:G:A | 211:chr15:<br>99434632:<br>G:A | 0.002525 |
| 106_bl-1 | 106 | NOTCH1 | MODERATE            | c.6107C>T                                        | p.Ala2036Val                                | 0     | FALSE | chr9:1393<br>93424:G:A | 211:chr9:1<br>39393424:<br>G:A | 0.002721 |
| 61_bl-1  | 61  | TSC1   | MODERATE            | c.1547C>T;<br>c.1697C>T;<br>c.1700C>T            | p.Ala516Val;<br>p.Ala566Val;<br>p.Ala567Val | 0     | FALSE | chr9:1357<br>81265:G:A | 212:chr9:1<br>35781265:<br>G:A | 0.00321  |
| 61_bl-1  | 61  | TSC2   | MODIFIER; MODERATE  | c.2837+10<br>92G>A;<br>c.2917G>A                 | p.Glu973Lys                                 | 0     | FALSE | chr16:212<br>7678:G:A  | 212:chr16:<br>2127678:G<br>:A  | 0.005435 |
| 61_bl-1  | 61  | EGFR   | MODERATE            | c.752G>A                                         | p.Cys251Tyr                                 | 1     | FALSE | chr7:5522<br>1708:G:A  | 212:chr7:5<br>5221708:G<br>:A  | 0.005602 |
| 61_bl-1  | 61  | NOTCH1 | MODERATE            | c.4906G>A                                        | p.Glu1636Lys                                | 0     | FALSE | chr9:1393<br>99237:C:T | 212:chr9:1<br>39399237:<br>C:T | 0.007653 |
| 61_bl-1  | 61  | RET    | MODERATE            | c.1826G>A                                        | p.Cys609Tyr                                 | 1     | FALSE | chr10:436<br>09070:G:A | 212:chr10:<br>43609070:<br>G:A | 0.006452 |
| 61_bl-1  | 61  | PTEN   | HIGH                | c.822G>A                                         | p.Trp274*                                   | 3     | FALSE | chr10:897<br>20671:G:A | 212:chr10:<br>89720671:<br>G:A | 0.020408 |
| 61_bl-1  | 61  | DDR2   | MODERATE            | c.700G>A                                         | p.Asp234Asn                                 | 1     | FALSE | chr1:1627<br>29614:G:A | 212:chr1:1<br>62729614:<br>G:A | 0.00565  |
| 61_bl-1  | 61  | CTNNA1 | MODERATE            | c.1346G>A                                        | p.Arg449His                                 | 0     | FALSE | chr3:4127<br>5180:G:A  | 212:chr3:4<br>1275180:G<br>:A  | 0.002911 |
| 61_bl-1  | 61  | BRAF   | MODERATE            | c.1799T>A                                        | p.Val600Glu                                 | 23024 | FALSE | chr7:1404<br>53136:A:T | 212:chr7:1<br>40453136:<br>A:T | 0.430124 |
| 61_bl-1  | 61  | PIK3CA | MODERATE            | c.1235G>A                                        | p.Arg412Gln                                 | 1     | FALSE | chr3:1789<br>27472:G:A | 212:chr3:1<br>78927472:<br>G:A | 0.005348 |
| 61_bl-1  | 61  | PIK3R1 | LOW; MODIFIER; HIGH | c.-48C>T;<br>c.1042C>T;<br>c.142C>T;<br>c.232C>T | p.Arg348*;<br>p.Arg48*;<br>p.Arg78*         | 24    | FALSE | chr5:6758<br>8951:C:T  | 212:chr5:6<br>7588951:C<br>:T  | 0.005263 |
| 61_bl-1  | 61  | CDH1   | MODERATE            | c.304G>A                                         | p.Ala102Thr                                 | 0     | FALSE | chr16:688<br>35713:G:A | 212:chr16:<br>68835713:<br>G:A | 0.006135 |

|         |    |                   |                    |                                                   |                                       |    |       |                        |                                |          |
|---------|----|-------------------|--------------------|---------------------------------------------------|---------------------------------------|----|-------|------------------------|--------------------------------|----------|
| 61_bl-1 | 61 | TP53              | HIGH; MODIFIER     | c.181C>T;<br>c.298C>T;<br>c.-279C>T;<br>c.-360C>T | p.Gln61*;<br>p.Gln100*;               | 16 | FALSE | chr17:757<br>9389:G:A  | 212:chr17:<br>7579389:G<br>:A  | 0.297872 |
| 61_bl-1 | 61 | NF1               | MODERATE           | c.4462C>T;<br>c.4525C>T                           | p.Arg1488C<br>ys;<br>p.Arg1509C<br>ys | 1  | FALSE | chr17:295<br>87481:C:T | 212:chr17:<br>29587481:<br>C:T | 0.004762 |
| 61_bl-1 | 61 | EPHA3             | MODERATE           | c.2530C>T                                         | p.Pro844Ser                           | 0  | FALSE | chr3:8949<br>9360:C:T  | 212:chr3:8<br>9499360:C<br>:T  | 0.004484 |
| 61_bl-1 | 61 | EGFR              | MODERATE           | c.755G>A                                          | p.Arg252His                           | 3  | FALSE | chr7:5522<br>1711:G:A  | 212:chr7:5<br>5221711:G<br>:A  | 0.007109 |
| 61_bl-1 | 61 | EGFR;<br>EGFR-AS1 | MODERATE; MODIFIER | c.2516C>T;<br>n.-1G>A                             | p.Ala839Val;                          | 1  | FALSE | chr7:5525<br>9458:C:T  | 212:chr7:5<br>5259458:C<br>:T  | 0.004283 |
| 61_bl-1 | 61 | MET               | HIGH               | c.1619G>A                                         | p.Trp540*                             | 1  | FALSE | chr7:1163<br>80997:G:A | 212:chr7:1<br>16380997:<br>G:A | 0.004082 |
| 61_bl-1 | 61 | FLT3              | MODERATE           | c.2845G>A                                         | p.Asp949As<br>n                       | 0  | FALSE | chr13:285<br>88603:C:T | 212:chr13:<br>28588603:<br>C:T | 0.00304  |
| 61_bl-1 | 61 | NOTCH1            | MODERATE           | c.4901C>T                                         | p.Ala1634Va<br>l                      | 0  | FALSE | chr9:1393<br>99242:G:A | 212:chr9:1<br>39399242:<br>G:A | 0.005076 |
| 61_bl-1 | 61 | PDGFRA            | MODERATE           | c.1499G>A                                         | p.Arg500Gln                           | 1  | FALSE | chr4:5513<br>9838:G:A  | 212:chr4:5<br>5139838:G<br>:A  | 0.004202 |
| 61_bl-1 | 61 | NTRK2             | MODERATE           | c.1408G>A<br>;<br>c.1456G>A                       | p.Val470Ile;<br>p.Val486Ile           | 0  | FALSE | chr9:8748<br>2169:G:A  | 212:chr9:8<br>7482169:G<br>:A  | 0.005181 |
| 61_bl-1 | 61 | TSC1              | MODERATE           | c.169G>A                                          | p.Ala57Thr                            | 0  | FALSE | chr9:1358<br>02629:C:T | 212:chr9:1<br>35802629:<br>C:T | 0.003584 |
| 61_bl-1 | 61 | EGFR              | MODERATE           | c.988G>A                                          | p.Glu330Lys                           | 1  | FALSE | chr7:5522<br>3621:G:A  | 212:chr7:5<br>5223621:G<br>:A  | 0.003571 |
| 61_bl-1 | 61 | PTEN              | MODERATE           | c.283C>T                                          | p.Pro95Ser                            | 3  | FALSE | chr10:896<br>92799:C:T | 212:chr10:<br>89692799:<br>C:T | 0.308157 |
| 61_bl-1 | 61 | STK11             | MODERATE           | c.488G>A                                          | p.Gly163Asp                           | 1  | FALSE | chr19:122<br>0395:G:A  | 212:chr19:<br>1220395:G<br>:A  | 0.010363 |
| 61_bl-1 | 61 | ESR1              | MODERATE           | c.739G>A;<br>c.745G>A                             | p.Glu247Lys<br>;<br>p.Glu249Lys       | 0  | FALSE | chr6:1522<br>01885:G:A | 212:chr6:1<br>52201885:<br>G:A | 0.005141 |
| 80_c3-2 | 80 | ESR1              | HIGH               | c.469C>T                                          | p.Arg157*                             | 0  | FALSE | chr6:1521<br>63748:C:T | 213:chr6:1<br>52163748:<br>C:T | 0.002237 |

|         |    |                             |                    |                                                                                               |                                                                         |    |       |                             |                                 |          |
|---------|----|-----------------------------|--------------------|-----------------------------------------------------------------------------------------------|-------------------------------------------------------------------------|----|-------|-----------------------------|---------------------------------|----------|
| 80_c3-2 | 80 | ERBB2;<br>MIEN1;<br>MIR4728 | MODERATE; MODIFIER | c.2720A>G<br>;<br>c.2765A>G<br>;<br>c.2810A>G<br>;<br>n.3134A>G<br>;<br>c.*388T>C;<br>n.-1A>G | p.Lys907Arg<br>;<br>p.Lys922Arg<br>;<br>p.Lys937Arg<br>;                | 1  | FALSE | chr17:378<br>82044:A:G      | 213:chr17:<br>37882044:<br>A:G  | 0.002618 |
| 80_c3-2 | 80 | ATM                         | HIGH               | c.6100C>T                                                                                     | p.Arg2034*                                                              | 0  | FALSE | chr11:108<br>186742:C:<br>T | 213:chr11:<br>10818674<br>2:C:T | 0.002128 |
| 80_c3-2 | 80 | RET                         | MODERATE           | c.1538C>T                                                                                     | p.Ala513Val                                                             | 1  | FALSE | chr10:436<br>07562:C:T      | 213:chr10:<br>43607562:<br>C:T  | 0.002077 |
| 80_c3-2 | 80 | MIR4673;<br>NOTCH1          | MODIFIER; MODERATE | n.*59G>A;<br>;<br>c.1058G>A                                                                   | p.Arg353His                                                             | 0  | FALSE | chr9:1394<br>13084:C:T      | 213:chr9:1<br>39413084:<br>C:T  | 0.002591 |
| 80_c3-2 | 80 | ALK                         | MODERATE           | c.886G>A                                                                                      | p.Glu296Lys                                                             | 1  | FALSE | chr2:2991<br>7782:C:T       | 213:chr2:2<br>9917782:C<br>:T   | 0.001951 |
| 80_c3-2 | 80 | PIK3CA                      | MODERATE           | c.1531G>A                                                                                     | p.Ala511Thr                                                             | 1  | FALSE | chr3:1789<br>28345:G:A      | 213:chr3:1<br>78928345:<br>G:A  | 0.002789 |
| 80_c3-2 | 80 | KDR                         | MODERATE           | c.887G>T                                                                                      | p.Gly296Val                                                             | 2  | FALSE | chr4:5597<br>9560:C:A       | 213:chr4:5<br>5979560:C<br>:A   | 0.001894 |
| 80_c3-2 | 80 | NTRK3                       | MODERATE           | c.1463C>T;<br>c.1487C>T                                                                       | p.Ala488Val;<br>p.Ala496Val                                             | 0  | FALSE | chr15:885<br>76186:G:A      | 213:chr15:<br>88576186:<br>G:A  | 0.002667 |
| 80_c3-2 | 80 | TP53                        | MODERATE           | c.106C>T;<br>c.25C>T;<br>c.385C>T;<br>c.502C>T                                                | p.His36Tyr;<br>p.His9Tyr;<br>p.His129Tyr;<br>p.His168Tyr                | 9  | FALSE | chr17:757<br>8428:G:A       | 213:chr17:<br>7578428:G<br>:A   | 0.002384 |
| 80_c3-2 | 80 | NOTCH1                      | MODERATE           | c.3635G>A                                                                                     | p.Gly1212Asp                                                            | 0  | FALSE | chr9:1394<br>01765:C:T      | 213:chr9:1<br>39401765:<br>C:T  | 0.00303  |
| 80_c3-2 | 80 | INSRR;<br>NTRK1             | MODIFIER; MODERATE | c.3397+28<br>C>T;<br>c.13G>A                                                                  | p.Ala5Thr                                                               | 3  | FALSE | chr1:1568<br>11876:G:A      | 213:chr1:1<br>56811876:<br>G:A  | 0.002153 |
| 80_c3-2 | 80 | TP53                        | MODIFIER; MODERATE | c.*122G>A<br>;<br>c.*34G>A;<br>c.1015G>A<br>;<br>c.538G>A;<br>c.619G>A;<br>c.898G>A           | p.Glu339Lys<br>;<br>p.Glu180Lys<br>;<br>p.Glu207Lys<br>;<br>p.Glu300Lys | 18 | FALSE | chr17:757<br>4012:C:T       | 213:chr17:<br>7574012:C<br>:T   | 0.002073 |
| 80_c3-2 | 80 | KDR                         | MODERATE           | c.2831G>A                                                                                     | p.Arg944Gln                                                             | 2  | FALSE | chr4:5596<br>1109:C:T       | 213:chr4:5<br>5961109:C<br>:T   | 0.002774 |

|         |    |                    |                            |                                                                           |                                                                                             |   |       |                     |                         |          |
|---------|----|--------------------|----------------------------|---------------------------------------------------------------------------|---------------------------------------------------------------------------------------------|---|-------|---------------------|-------------------------|----------|
| 80_c3-2 | 80 | DDR2               | MODERATE                   | c.2255G>A                                                                 | p.Arg752His                                                                                 | 1 | FALSE | chr1:162746132:G:A  | 213:chr1:162746132:G:A  | 0.001744 |
| 80_c3-2 | 80 | FGFR2              | MODERATE; MODIFIER         | c.148C>T;<br>c.226C>T;<br>c.493C>T;<br>n.795C>T                           | p.Arg50Trp;<br>p.Arg76Trp;<br>p.Arg165Trp                                                   | 1 | FALSE | chr10:123310935:G:A | 213:chr10:123310935:G:A | 0.00246  |
| 80_c3-2 | 80 | GNA11              | MODERATE                   | c.1030G>A                                                                 | p.Val344Met                                                                                 | 1 | FALSE | chr19:3121127:G:A   | 213:chr19:3121127:G:A   | 0.00225  |
| 80_c3-2 | 80 | APC                | HIGH                       | c.1209G>A;<br>c.1263G>A                                                   | p.Trp403*;<br>p.Trp421*                                                                     | 0 | FALSE | chr5:112154992:G:A  | 213:chr5:112154992:G:A  | 0.002186 |
| 80_c3-2 | 80 | C9orf53;<br>CDKN2A | MODIFIER; MODERATE;<br>LOW | n.*616G>A;<br>c.*222C>T;<br>c.299C>T;<br>c.342C>T                         | p.Ala100Val;<br>p.Gly114Gly                                                                 | 2 | FALSE | chr9:21971059:G:A   | 213:chr9:21971059:G:A   | 0.005348 |
| 80_c3-2 | 80 | HGF                | MODERATE                   | c.1172G>A;<br>c.1187G>A                                                   | p.Gly391Asp;<br>p.Gly396Asp                                                                 | 0 | FALSE | chr7:81350145:C:T   | 213:chr7:81350145:C:T   | 0.002469 |
| 80_c3-2 | 80 | MET                | HIGH                       | c.1619G>A                                                                 | p.Trp540*                                                                                   | 1 | FALSE | chr7:116380997:G:A  | 213:chr7:116380997:G:A  | 0.002715 |
| 80_c3-2 | 80 | NTRK2              | MODERATE                   | c.1285G>A;<br>c.1324G>A                                                   | p.Val429Met;<br>p.Val442Met                                                                 | 0 | FALSE | chr9:87366928:G:A   | 213:chr9:87366928:G:A   | 0.002387 |
| 80_c3-2 | 80 | ATM                | MODERATE                   | c.6115G>A                                                                 | p.Glu2039Lys                                                                                | 0 | FALSE | chr11:108186757:G:A | 213:chr11:108186757:G:A | 0.002055 |
| 80_c3-2 | 80 | TSC2               | MODIFIER; MODERATE         | c.2837+1108G>A;<br>c.2933G>A                                              | p.Arg978His                                                                                 | 0 | FALSE | chr16:2127694:G:A   | 213:chr16:2127694:G:A   | 0.002628 |
| 80_c3-2 | 80 | FGFR1              | MODERATE                   | c.487C>T;<br>c.493C>T;<br>c.736C>T;<br>c.754C>T;<br>c.760C>T;<br>c.853C>T | p.Arg163Trp;<br>p.Arg165Trp;<br>p.Arg246Trp;<br>p.Arg252Trp;<br>p.Arg254Trp;<br>p.Arg285Trp | 1 | FALSE | chr8:38282203:G:A   | 213:chr8:38282203:G:A   | 0.002191 |
| 80_c3-2 | 80 | CTNNB1             | MODERATE                   | c.1345C>T                                                                 | p.Arg449Cys                                                                                 | 0 | FALSE | chr3:41275179:C:T   | 213:chr3:41275179:C:T   | 0.001744 |

|         |    |                             |                    |                                                                                             |                                                            |       |       |                    |                        |          |
|---------|----|-----------------------------|--------------------|---------------------------------------------------------------------------------------------|------------------------------------------------------------|-------|-------|--------------------|------------------------|----------|
| 80_c3-2 | 80 | NOTCH1                      | MODERATE           | c.4918G>A                                                                                   | p.Ala1640Thr                                               | 0     | FALSE | chr9:139399225:C:T | 213:chr9:139399225:C:T | 0.003781 |
| 80_c3-2 | 80 | GNA11                       | MODERATE           | c.805G>A                                                                                    | p.Val269Ile                                                | 1     | FALSE | chr19:3119273:G:A  | 213:chr19:3119273:G:A  | 0.002608 |
| 80_c3-2 | 80 | MET                         | MODERATE           | c.2684C>T;<br>c.2738C>T                                                                     | p.Thr895Met;<br>p.Thr913Met                                | 1     | FALSE | chr7:116409799:C:T | 213:chr7:116409799:C:T | 0.002188 |
| 80_c3-2 | 80 | ALK                         | MODERATE           | c.536G>A                                                                                    | p.Arg179His                                                | 1     | FALSE | chr2:30142990:C:T  | 213:chr2:30142990:C:T  | 0.002247 |
| 80_c3-2 | 80 | IGF1R                       | MODERATE           | c.1511G>A                                                                                   | p.Arg504His                                                | 0     | FALSE | chr15:99454592:G:A | 213:chr15:99454592:G:A | 0.001934 |
| 80_c3-2 | 80 | CTNNB1                      | MODERATE           | c.149G>A                                                                                    | p.Gly50Asp                                                 | 0     | FALSE | chr3:41266152:G:A  | 213:chr3:41266152:G:A  | 0.002415 |
| 80_c3-2 | 80 | NF1                         | MODERATE           | c.2740C>T                                                                                   | p.Arg914Trp                                                | 1     | FALSE | chr17:29556373:C:T | 213:chr17:29556373:C:T | 0.003198 |
| 80_c3-2 | 80 | CTNNB1                      | MODERATE           | c.1564G>A                                                                                   | p.Ala522Thr                                                | 0     | FALSE | chr3:41275669:G:A  | 213:chr3:41275669:G:A  | 0.002395 |
| 55_bl-1 | 55 | EGFR;<br>EGFR-AS1           | MODERATE; MODIFIER | c.2410G>A;<br>n.1152C>T                                                                     | p.Glu804Lys                                                | 2     | FALSE | chr7:55249112:G:A  | 214:chr7:55249112:G:A  | 0.007018 |
| 55_bl-1 | 55 | ERBB2;<br>MIR4728;<br>MIEN1 | MODERATE; MODIFIER | c.3518T>C;<br>c.3428T>C;<br>c.3473T>C;<br>c.*97T>C;<br>n.*67T>C;<br>c.*388A>G;<br>n.3842T>C | p.Leu1173Pro;<br>p.Leu1143Pro;<br>p.Leu1158Pro             | 1     | FALSE | chr17:37884047:T:C | 214:chr17:37884047:T:C | 0.00813  |
| 38_c2-2 | 38 | KRAS                        | MODERATE           | c.35G>A                                                                                     | p.Gly12Asp                                                 | 11213 | FALSE | chr12:25398284:C:T | 215:chr12:25398284:C:T | 0.078864 |
| 38_c2-2 | 38 | PIK3CA                      | MODERATE           | c.1634A>C                                                                                   | p.Glu545Ala                                                | 132   | FALSE | chr3:178936092:A:C | 215:chr3:178936092:A:C | 0.006579 |
| 38_c2-2 | 38 | TP53                        | MODERATE           | c.265C>T;<br>c.346C>T;<br>c.625C>T;<br>c.742C>T                                             | p.Arg89Trp;<br>p.Arg116Trp;<br>p.Arg209Trp;<br>p.Arg248Trp | 559   | FALSE | chr17:757539:G:A   | 215:chr17:757539:G:A   | 0.058741 |
| 38_c2-2 | 38 | MAP2K1                      | MODERATE           | c.145C>T                                                                                    | p.Arg49Cys                                                 | 1     | FALSE | chr15:66727429:C:T | 215:chr15:66727429:C:T | 0.002026 |



|         |    |        |                         |                                                                                    |                                                                                                                      |    |       |                    |                        |          |
|---------|----|--------|-------------------------|------------------------------------------------------------------------------------|----------------------------------------------------------------------------------------------------------------------|----|-------|--------------------|------------------------|----------|
| 54_bl-b | 54 | ROS1   | MODERATE                | c.5687T>G                                                                          | p.Val1896Gly                                                                                                         | 1  | FALSE | chr6:117642512:A:C | 216:chr6:17642512:A:C  | 0.004348 |
| 54_bl-b | 54 | TP53   | MODERATE; MODIFIER      | c.215C>G;<br>c.98C>G; c.279C>G; c.360C>G                                           | p.Pro72Arg;<br>p.Pro33Arg;                                                                                           | 9  | TRUE  | chr17:7579472:G:C  | 216:chr17:7579472:G:C  | 0.08046  |
| 54_bl-b | 54 | MAP2K1 | MODERATE                | c.145C>T                                                                           | p.Arg49Cys                                                                                                           | 1  | FALSE | chr15:66727429:C:T | 216:chr15:66727429:C:T | 0.003315 |
| 54_bl-b | 54 | TP53   | LOW; MODIFIER; MODERATE | c.-23C>T;<br>c.338C>T;<br>c.455C>T;<br>c.59C>T                                     | p.Pro113Leu;<br>;<br>p.Pro152Leu;<br>; p.Pro20Leu                                                                    | 72 | FALSE | chr17:7578475:G:A  | 216:chr17:7578475:G:A  | 0.004673 |
| 54_bl-b | 54 | TP53   | MODERATE                | c.261G>T;<br>c.342G>T;<br>c.621G>T;<br>c.738G>T                                    | p.Met87Ile;<br>p.Met114Ile;<br>;<br>p.Met207Ile;<br>;<br>p.Met246Ile                                                 | 21 | FALSE | chr17:7577543:C:A  | 216:chr17:7577543:C:A  | 0.002833 |
| 54_bl-b | 54 | RET    | MODERATE                | c.1438G>A                                                                          | p.Glu480Lys                                                                                                          | 1  | FALSE | chr10:43606829:G:A | 216:chr10:43606829:G:A | 0.004054 |
| 54_bl-b | 54 | ALK    | MODERATE                | c.3455T>C                                                                          | p.Leu1152Pro                                                                                                         | 1  | FALSE | chr2:29445270:A:G  | 216:chr2:29445270:A:G  | 0.009736 |
| 54_bl-b | 54 | FGFR1  | MODERATE                | c.1060C>T;<br>c.1066C>T;<br>c.1303C>T;<br>c.1327C>T;<br>c.1333C>T;<br>c.1426C>T    | p.Arg354Trp;<br>;<br>p.Arg356Trp;<br>;<br>p.Arg435Trp;<br>;<br>p.Arg443Trp;<br>;<br>p.Arg445Trp;<br>;<br>p.Arg476Trp | 2  | FALSE | chr8:38275843:G:A  | 216:chr8:38275843:G:A  | 0.004435 |
| 54_bl-b | 54 | TP53   | MODIFIER; HIGH          | c.*143G>T;<br>; c.*55G>T;<br>c.1036G>T;<br>;<br>c.559G>T;<br>c.640G>T;<br>c.919G>T | p.Glu346*;<br>p.Glu187*;<br>p.Glu214*;<br>p.Glu307*                                                                  | 4  | FALSE | chr17:7573991:C:A  | 216:chr17:7573991:C:A  | 0.003807 |
| 54_bl-b | 54 | RET    | MODERATE                | c.1690A>C                                                                          | p.Thr564Pro                                                                                                          | 1  | FALSE | chr10:43608342:A:C | 216:chr10:43608342:A:C | 0.002433 |

|         |    |        |                    |                                                                             |                                                                  |       |       |                    |                        |          |
|---------|----|--------|--------------------|-----------------------------------------------------------------------------|------------------------------------------------------------------|-------|-------|--------------------|------------------------|----------|
| 54_bl-b | 54 | DDR2   | MODERATE           | c.1418G>A                                                                   | p.Arg473His                                                      | 2     | FALSE | chr1:162740216:G:A | 216:chr1:162740216:G:A | 0.002577 |
| 38_c3-2 | 38 | EPHA3  | MODERATE           | c.2734A>T                                                                   | p.Thr912Ser                                                      | 0     | FALSE | chr3:89521657:A:T  | 217:chr3:89521657:A:T  | 0.004843 |
| 38_c3-2 | 38 | TP53   | MODERATE           | c.265C>T;<br>c.346C>T;<br>c.625C>T;<br>c.742C>T                             | p.Arg89Trp;<br>p.Arg116Trp;<br>; p.Arg209Trp<br>; p.Arg248Trp    | 559   | FALSE | chr17:7577539:G:A  | 217:chr17:7577539:G:A  | 0.080831 |
| 38_c3-2 | 38 | PIK3CA | MODERATE           | c.1634A>C                                                                   | p.Glu545Ala                                                      | 132   | FALSE | chr3:178936092:A:C | 217:chr3:178936092:A:C | 0.006024 |
| 38_c3-2 | 38 | KRAS   | MODERATE           | c.35G>A                                                                     | p.Gly12Asp                                                       | 11213 | FALSE | chr12:25398284:C:T | 217:chr12:25398284:C:T | 0.086093 |
| 70_c3-1 | 70 | GNA11  | MODERATE           | c.340C>T                                                                    | p.Arg114Trp                                                      | 1     | FALSE | chr19:3113346:C:T  | 218:chr19:3113346:C:T  | 0.001228 |
| 70_c3-1 | 70 | TP53   | MODIFIER; MODERATE | c.-24C>T;<br>c.337C>T;<br>c.454C>T;<br>c.58C>T                              | ; p.Pro113Ser<br>; p.Pro152Ser<br>; p.Pro20Ser                   | 24    | FALSE | chr17:7578476:G:A  | 218:chr17:7578476:G:A  | 0.001745 |
| 70_c3-1 | 70 | NF1    | MODERATE           | c.6943G>A;<br>; c.7006G>A                                                   | p.Ala2315Thr;<br>; p.Ala2336Thr                                  | 2     | FALSE | chr17:29667607:G:A | 218:chr17:29667607:G:A | 0.001078 |
| 70_c3-1 | 70 | TP53   | MODERATE; MODIFIER | c.115G>T;<br>c.232G>T;<br>c.-279G>T;<br>c.-360G>T                           | p.Ala39Ser;<br>p.Ala78Ser;                                       | 1     | FALSE | chr17:7579455:C:A  | 218:chr17:7579455:C:A  | 0.001934 |
| 70_c3-1 | 70 | TP53   | MODERATE           | c.266G>A;<br>c.347G>A;<br>c.626G>A;<br>c.743G>A                             | p.Arg89Gln;<br>p.Arg116Gln;<br>; p.Arg209Gln<br>; p.Arg248Gln    | 673   | FALSE | chr17:757538:C:T   | 218:chr17:757538:C:T   | 0.001558 |
| 70_c3-1 | 70 | TP53   | MODIFIER; MODERATE | c.*182C>T;<br>c.*94C>T;<br>c.1075C>T;<br>c.598C>T;<br>c.679C>T;<br>c.958C>T | ; p.Pro359Ser<br>; p.Pro200Ser<br>; p.Pro227Ser<br>; p.Pro320Ser | 1     | FALSE | chr17:7573952:G:A  | 218:chr17:7573952:G:A  | 0.000978 |

|         |    |                    |                    |                                                                             |                                                             |    |       |                    |                        |          |
|---------|----|--------------------|--------------------|-----------------------------------------------------------------------------|-------------------------------------------------------------|----|-------|--------------------|------------------------|----------|
| 70_c3-1 | 70 | PTEN               | MODERATE           | c.729C>A                                                                    | p.Phe243Leu                                                 | 1  | FALSE | chr10:89717704:C:A | 218:chr10:89717704:C:A | 0.001223 |
| 70_c3-1 | 70 | CTNNB1             | MODERATE           | c.98C>A                                                                     | p.Ser33Tyr                                                  | 0  | FALSE | chr3:41266101:C:A  | 218:chr3:41266101:C:A  | 0.001651 |
| 70_c3-1 | 70 | EGFR;<br>EGFR-AS1  | MODERATE; MODIFIER | c.2527G>A;<br>n.-1C>T                                                       | p.Val843Ile;                                                | 6  | FALSE | chr7:55259469:G:A  | 218:chr7:55259469:G:A  | 0.001818 |
| 70_c3-1 | 70 | PIK3CA             | MODERATE           | c.518C>A                                                                    | p.Ser173Tyr                                                 | 1  | FALSE | chr3:178917643:C:A | 218:chr3:178917643:C:A | 0.000986 |
| 70_c3-1 | 70 | NF1                | MODERATE           | c.7583C>T;<br>c.7646C>T                                                     | p.Ser2528Leu;<br>p.Ser2549Leu                               | 3  | FALSE | chr17:29683508:C:T | 218:chr17:29683508:C:T | 0.0011   |
| 70_c3-1 | 70 | CTNNB1             | HIGH               | c.283C>T                                                                    | p.Arg95*                                                    | 0  | FALSE | chr3:41266486:C:T  | 218:chr3:41266486:C:T  | 0.001124 |
| 70_c3-1 | 70 | HOXD-AS2;<br>HOXD8 | MODIFIER; MODERATE | n.*692G>T;<br>c.22C>A;<br>c.574C>A                                          | p.Gln8Lys;<br>p.Gln192Lys                                   | 0  | FALSE | chr2:176995668:C:A | 218:chr2:176995668:C:A | 0.002114 |
| 70_c3-1 | 70 | NRAS               | MODERATE           | c.394G>A                                                                    | p.Glu132Lys                                                 | 2  | FALSE | chr1:115252246:C:T | 218:chr1:115252246:C:T | 0.001082 |
| 70_c3-1 | 70 | CTNNB1             | MODERATE           | c.861C>A                                                                    | p.Asn287Lys                                                 | 0  | FALSE | chr3:41267277:C:A  | 218:chr3:41267277:C:A  | 0.001135 |
| 70_c3-1 | 70 | EGFR               | MODERATE           | c.445C>T                                                                    | p.Arg149Trp                                                 | 1  | FALSE | chr7:55214319:C:T  | 218:chr7:55214319:C:T  | 0.001263 |
| 70_c3-1 | 70 | AKT3               | MODERATE           | c.793G>A                                                                    | p.Gly265Arg                                                 | 0  | FALSE | chr1:243736254:C:T | 218:chr1:243736254:C:T | 0.00108  |
| 70_c3-1 | 70 | MET                | MODERATE           | c.1450C>A                                                                   | p.His484Asn                                                 | 1  | FALSE | chr7:116380061:C:A | 218:chr7:116380061:C:A | 0.001048 |
| 70_c3-1 | 70 | KIT                | MODERATE           | c.1156G>A                                                                   | p.Glu386Lys                                                 | 1  | FALSE | chr4:55575630:G:A  | 218:chr4:55575630:G:A  | 0.001139 |
| 70_c3-1 | 70 | NF1                | MODERATE           | c.5482G>A;<br>c.5545G>A                                                     | p.Asp1828Asn;<br>p.Asp1849Asn                               | 1  | FALSE | chr17:29654793:G:A | 218:chr17:29654793:G:A | 0.001116 |
| 70_c3-1 | 70 | HGF                | HIGH               | c.1993G>T;<br>c.2008G>T                                                     | p.Glu665*;<br>p.Glu670*                                     | 0  | FALSE | chr7:81334708:C:A  | 218:chr7:81334708:C:A  | 0.001265 |
| 70_c3-1 | 70 | TP53               | MODIFIER; MODERATE | c.*117G>T;<br>c.*29G>T;<br>c.1010G>T;<br>c.533G>T;<br>c.614G>T;<br>c.893G>T | p.Arg337Leu;<br>p.Arg178Leu;<br>p.Arg205Leu;<br>p.Arg298Leu | 21 | FALSE | chr17:7574017:C:A  | 218:chr17:7574017:C:A  | 0.01206  |

|         |    |        |                    |                                                   |                                             |   |       |                             |                                 |          |
|---------|----|--------|--------------------|---------------------------------------------------|---------------------------------------------|---|-------|-----------------------------|---------------------------------|----------|
| 61_c2-2 | 61 | PIK3CA | MODERATE           | c.49C>T                                           | p.Pro17Ser                                  | 1 | FALSE | chr3:1789<br>16662:C:T      | 219:chr3:1<br>78916662:<br>C:T  | 0.00216  |
| 61_c2-2 | 61 | PTEN   | HIGH               | c.822G>A                                          | p.Trp274*                                   | 3 | FALSE | chr10:897<br>20671:G:A      | 219:chr10:<br>89720671:<br>G:A  | 0.00464  |
| 61_c2-2 | 61 | EPHA3  | MODERATE           | c.1123C>T                                         | p.Pro375Ser                                 | 0 | FALSE | chr3:8939<br>1057:C:T       | 219:chr3:8<br>9391057:C<br>:T   | 0.001978 |
| 61_c2-2 | 61 | TP53   | MODERATE; MODIFIER | c.254G>A;<br>c.371G>A;<br>c.-279G>A;<br>c.-360G>A | p.Cys85Tyr;<br>p.Cys124Tyr<br>;             | 3 | FALSE | chr17:757<br>9316:C:T       | 219:chr17:<br>7579316:C<br>:T   | 0.003086 |
| 61_c2-2 | 61 | CDH1   | MODERATE           | c.2204C>T                                         | p.Ala735Val                                 | 0 | FALSE | chr16:688<br>62116:C:T      | 219:chr16:<br>68862116:<br>C:T  | 0.002413 |
| 61_c2-2 | 61 | ALK    | MODERATE           | c.4435G>A                                         | p.Ala1479Thr                                | 1 | FALSE | chr2:2941<br>6518:C:T       | 219:chr2:2<br>9416518:C<br>:T   | 0.002804 |
| 61_c2-2 | 61 | NTRK1  | MODERATE           | c.1927G>A<br>;<br>c.2017G>A<br>;<br>c.2035G>A     | p.Asp643Asn;<br>p.Asp673Asn;<br>p.Asp679Asn | 1 | FALSE | chr1:1568<br>49143:G:A      | 219:chr1:1<br>56849143:<br>G:A  | 0.002778 |
| 61_c2-2 | 61 | EPHA3  | MODERATE           | c.2248C>T                                         | p.Arg750Trp                                 | 0 | FALSE | chr3:8948<br>0411:C:T       | 219:chr3:8<br>9480411:C<br>:T   | 0.002786 |
| 61_c2-2 | 61 | MITF   | MODIFIER; MODERATE | c.-45G>A;<br>c.109G>A;<br>c.112G>A;<br>c.64G>A    | p.Ala37Thr;<br>p.Ala38Thr;<br>p.Ala22Thr    | 0 | FALSE | chr3:6992<br>8292:G:A       | 219:chr3:6<br>9928292:G<br>:A   | 0.00226  |
| 61_c2-2 | 61 | PDGFRA | MODERATE           | c.862T>C                                          | p.Tyr288His                                 | 1 | FALSE | chr4:5513<br>3558:T:C       | 219:chr4:5<br>5133558:T<br>:C   | 0.002364 |
| 61_c2-2 | 61 | IGF1R  | MODERATE           | c.3637C>A<br>;<br>c.3640C>A                       | p.Gln1213Lys;<br>p.Gln1214Lys               | 0 | FALSE | chr15:994<br>91855:C:A      | 219:chr15:<br>99491855:<br>C:A  | 0.002252 |
| 61_c2-2 | 61 | ALK    | MODERATE           | c.4306C>T                                         | p.Arg1436Cys                                | 3 | FALSE | chr2:2941<br>6647:G:A       | 219:chr2:2<br>9416647:G<br>:A   | 0.001949 |
| 61_c2-2 | 61 | FLT3   | MODERATE           | c.2858C>T                                         | p.Ala953Val                                 | 0 | FALSE | chr13:285<br>88590:G:A      | 219:chr13:<br>28588590:<br>G:A  | 0.002415 |
| 61_c2-2 | 61 | AKT1   | MODERATE           | c.340G>C                                          | p.Glu114Gln                                 | 1 | FALSE | chr14:105<br>242084:C:<br>G | 219:chr14:<br>10524208<br>4:C:G | 0.002509 |
| 61_c2-2 | 61 | MET    | MODERATE           | c.1627G>A                                         | p.Asp543Asn                                 | 1 | FALSE | chr7:1163<br>81005:G:A      | 219:chr7:1<br>16381005:<br>G:A  | 0.002755 |
| 61_c2-2 | 61 | CDH1   | MODERATE           | c.2074G>A                                         | p.Ala692Thr                                 | 0 | FALSE | chr16:688<br>57439:G:A      | 219:chr16:<br>68857439:<br>G:A  | 0.002301 |

|         |    |                    |                            |                                                                 |                                                          |    |       |                        |                                |          |
|---------|----|--------------------|----------------------------|-----------------------------------------------------------------|----------------------------------------------------------|----|-------|------------------------|--------------------------------|----------|
| 61_c2-2 | 61 | MET                | MODERATE                   | c.1234C>T                                                       | p.Arg412Cys                                              | 1  | FALSE | chr7:1163<br>71755:C:T | 219:chr7:1<br>16371755:<br>C:T | 0.002296 |
| 61_c2-2 | 61 | EGFR               | MODIFIER; MODERATE         | c.*2364G><br>A;<br>c.2161G>A                                    | p.Gly721Ser                                              | 5  | FALSE | chr7:5524<br>1713:G:A  | 219:chr7:5<br>5241713:G<br>:A  | 0.002481 |
| 61_c2-2 | 61 | NOTCH1             | MODERATE                   | c.3374C>T                                                       | p.Ala1125Val                                             | 0  | FALSE | chr9:1394<br>02543:G:A | 219:chr9:1<br>39402543:<br>G:A | 0.00346  |
| 61_c2-2 | 61 | IGF1R              | MODERATE                   | c.1565G>A                                                       | p.Ser522Asn                                              | 0  | FALSE | chr15:994<br>54646:G:A | 219:chr15:<br>99454646:<br>G:A | 0.003513 |
| 61_c2-2 | 61 | GNA11              | MODERATE                   | c.1030G>A                                                       | p.Val344Met                                              | 1  | FALSE | chr19:312<br>1127:G:A  | 219:chr19:<br>3121127:G<br>:A  | 0.005195 |
| 61_c2-2 | 61 | TSC2               | MODERATE                   | c.1654G>A                                                       | p.Ala552Thr                                              | 0  | FALSE | chr16:211<br>5574:G:A  | 219:chr16:<br>2115574:G<br>:A  | 0.003968 |
| 61_c2-2 | 61 | TP53               | LOW; MODIFIER;<br>MODERATE | c.-6C>T;<br>c.355C>T;<br>c.472C>T;<br>c.76C>T                   | p.Arg119Cys<br>;<br>p.Arg158Cys<br>;<br>p.Arg26Cys       | 17 | FALSE | chr17:757<br>8458:G:A  | 219:chr17:<br>7578458:G<br>:A  | 0.002663 |
| 61_c2-2 | 61 | ERBB2              | MODIFIER; HIGH             | n.2202C>A<br>;<br>c.1788C>A<br>;<br>c.1833C>A<br>;<br>c.1878C>A | p.Cys596*;<br>p.Cys611*;<br>p.Cys626*                    | 2  | FALSE | chr17:378<br>73713:C:A | 219:chr17:<br>37873713:<br>C:A | 0.00274  |
| 61_c2-2 | 61 | ERBB2              | MODERATE; MODIFIER         | c.560G>A;<br>c.605G>A;<br>c.650G>A;<br>n.974G>A                 | p.Arg187His<br>;<br>p.Arg202His<br>;<br>p.Arg217His<br>; | 1  | FALSE | chr17:378<br>66345:G:A | 219:chr17:<br>37866345:<br>G:A | 0.002484 |
| 61_c2-2 | 61 | MET                | HIGH                       | c.1619G>A                                                       | p.Trp540*                                                | 1  | FALSE | chr7:1163<br>80997:G:A | 219:chr7:1<br>16380997:<br>G:A | 0.001931 |
| 61_c2-2 | 61 | PTEN               | MODERATE                   | c.283C>T                                                        | p.Pro95Ser                                               | 3  | FALSE | chr10:896<br>92799:C:T | 219:chr10:<br>89692799:<br>C:T | 0.004559 |
| 61_c2-2 | 61 | MIR4673;<br>NOTCH1 | MODIFIER; MODERATE         | n.*59G>A;<br>c.1058G>A                                          | p.Arg353His                                              | 0  | FALSE | chr9:1394<br>13084:C:T | 219:chr9:1<br>39413084:<br>C:T | 0.002762 |
| 61_c2-2 | 61 | KIT                | MODERATE                   | c.1486G>A                                                       | p.Asp496Asn                                              | 1  | FALSE | chr4:5559<br>2162:G:A  | 219:chr4:5<br>5592162:G<br>:A  | 0.00292  |
| 61_c2-2 | 61 | C9orf53;<br>CDKN2A | MODIFIER; MODERATE;<br>LOW | n.*616G>A<br>;<br>c.*222C>T;<br>c.299C>T;<br>c.342C>T           | p.Ala100Val;<br>p.Gly114Gly                              | 2  | FALSE | chr9:2197<br>1059:G:A  | 219:chr9:2<br>1971059:G<br>:A  | 0.003953 |

|         |    |                             |                    |                                                                                                                                                            |                                                                                                                 |    |       |                        |                                |          |
|---------|----|-----------------------------|--------------------|------------------------------------------------------------------------------------------------------------------------------------------------------------|-----------------------------------------------------------------------------------------------------------------|----|-------|------------------------|--------------------------------|----------|
| 61_c2-2 | 61 | EGFR                        | MODIFIER; MODERATE | c.*2364G>A;<br>c.2125G>A                                                                                                                                   | p.Glu709Lys                                                                                                     | 21 | FALSE | chr7:5524<br>1677:G:A  | 219:chr7:5<br>5241677:G:A      | 0.002252 |
| 61_c2-2 | 61 | PTEN                        | HIGH               | c.821G>A                                                                                                                                                   | p.Trp274*                                                                                                       | 6  | FALSE | chr10:897<br>20670:G:A | 219:chr10:<br>89720670:<br>G:A | 0.004706 |
| 61_c2-2 | 61 | FBXW7                       | MODERATE           | c.314G>T;<br>c.428G>T;<br>c.668G>T                                                                                                                         | p.Arg105Leu<br>;<br>p.Arg143Leu<br>;<br>p.Arg223Leu                                                             | 0  | FALSE | chr4:1532<br>68140:C:A | 219:chr4:1<br>53268140:<br>C:A | 0.003222 |
| 61_c2-2 | 61 | FGFR1;<br>LETM2             | MODERATE; MODIFIER | c.1927C>T;<br>c.1933C>T;<br>c.2170C>T;<br>c.2194C>T;<br>c.2200C>T;<br>c.2293C>T;<br>c.*1406G>A;<br>c.*1423G>A;<br>c.*1553G>A;<br>c.*1567G>A;<br>c.*1638G>A | p.Arg643Trp<br>;<br>p.Arg645Trp<br>;<br>p.Arg724Trp<br>;<br>p.Arg732Trp<br>;<br>p.Arg734Trp<br>;<br>p.Arg765Trp | 1  | FALSE | chr8:3827<br>1528:G:A  | 219:chr8:3<br>8271528:G:A      | 0.00409  |
| 61_c2-2 | 61 | NF1                         | MODERATE           | c.6943G>A;<br>;<br>c.7006G>A                                                                                                                               | p.Ala2315Thr<br>;<br>p.Ala2336Thr                                                                               | 2  | FALSE | chr17:296<br>67607:G:A | 219:chr17:<br>29667607:<br>G:A | 0.002488 |
| 61_c2-2 | 61 | KIT                         | MODERATE           | c.2671G>A;<br>;<br>c.2683G>A                                                                                                                               | p.Ala891Thr<br>;<br>p.Ala895Thr                                                                                 | 3  | FALSE | chr4:5560<br>2973:G:A  | 219:chr4:5<br>5602973:G:A      | 0.00388  |
| 61_c2-2 | 61 | NOTCH1                      | MODERATE           | c.4984C>T                                                                                                                                                  | p.Arg1662Trp                                                                                                    | 0  | FALSE | chr9:1393<br>99159:G:A | 219:chr9:1<br>39399159:<br>G:A | 0.003861 |
| 61_c2-2 | 61 | FGFR3                       | MODERATE           | c.905G>A                                                                                                                                                   | p.Gly302Asp                                                                                                     | 1  | FALSE | chr4:1803<br>727:G:A   | 219:chr4:1<br>803727:G:A       | 0.003035 |
| 61_c2-2 | 61 | ERBB2;<br>MIEN1;<br>MIR4728 | MODERATE; MODIFIER | c.2720A>G<br>;<br>c.2765A>G<br>;<br>c.2810A>G<br>;<br>n.3134A>G<br>;<br>c.*388T>C;<br>n.-1A>G                                                              | p.Lys907Arg<br>;<br>p.Lys922Arg<br>;<br>p.Lys937Arg                                                             | 1  | FALSE | chr17:378<br>82044:A:G | 219:chr17:<br>37882044:<br>A:G | 0.002882 |

|             |    |                 |                    |                                                   |                                                                |       |       |                     |                         |          |
|-------------|----|-----------------|--------------------|---------------------------------------------------|----------------------------------------------------------------|-------|-------|---------------------|-------------------------|----------|
| 61_c2-2     | 61 | NF1             | MODERATE           | c.5426G>A;<br>;<br>c.5489G>A                      | p.Arg1809His;<br>p.Arg1830His                                  | 1     | FALSE | chr17:29654737:G:A  | 219:chr17:29654737:G:A  | 0.002868 |
| 61_c2-2     | 61 | TP53            | HIGH; MODIFIER     | c.181C>T;<br>c.298C>T;<br>c.-279C>T;<br>c.-360C>T | p.Gln61*;<br>p.Gln100*                                         | 16    | FALSE | chr17:7579389:G:A   | 219:chr17:7579389:G:A   | 0.042781 |
| 61_c2-2     | 61 | ALK             | MODERATE           | c.872G>A                                          | p.Arg291His                                                    | 1     | FALSE | chr2:29917796:C:T   | 219:chr2:29917796:C:T   | 0.002224 |
| 61_c2-2     | 61 | BRAF            | MODERATE           | c.1799T>A                                         | p.Val600Glu                                                    | 23024 | FALSE | chr7:140453136:A:T  | 219:chr7:140453136:A:T  | 0.034351 |
| 61_c2-2     | 61 | TP53            | MODERATE           | c.127C>T;<br>c.208C>T;<br>c.487C>T;<br>c.604C>T   | p.Arg43Cys;<br>p.Arg70Cys;<br>p.Arg163Cys;<br>; p.Arg202Cys    | 6     | FALSE | chr17:7578245:G:A   | 219:chr17:7578245:G:A   | 0.002424 |
| 26_t2c2d1-1 | 26 | TP53            | MODERATE           | c.256G>A;<br>c.337G>A;<br>c.616G>A;<br>c.733G>A   | p.Gly86Ser;<br>p.Gly113Ser;<br>; p.Gly206Ser;<br>; p.Gly245Ser | 361   | FALSE | chr17:7577548:C:T   | 220:chr17:7577548:C:T   | 0.00468  |
| 26_t2c2d1-1 | 26 | TSC2            | MODERATE           | c.3032G>A;<br>;<br>c.3164G>A                      | p.Gly1011Asp;<br>p.Gly1055Asp                                  | 0     | FALSE | chr16:2129309:G:A   | 220:chr16:2129309:G:A   | 0.003534 |
| 26_t2c2d1-1 | 26 | IDH2;<br>ZNF710 | MODERATE; MODIFIER | c.602C>T;<br>c.836C>T;<br>c.992C>T;<br>c.*2147G>A | p.Thr201Met;<br>p.Thr279Met;<br>t;<br>p.Thr331Met;             | 1     | FALSE | chr15:90628595:G:A  | 220:chr15:90628595:G:A  | 0.003333 |
| 26_t2c2d1-1 | 26 | FGFR2           | MODERATE; MODIFIER | c.148C>T;<br>c.226C>T;<br>c.493C>T;<br>n.795C>T   | p.Arg50Trp;<br>p.Arg76Trp;<br>p.Arg165Trp;<br>;                | 1     | FALSE | chr10:123310935:G:A | 220:chr10:123310935:G:A | 0.003284 |
| 26_t2c2d1-1 | 26 | BRAF            | MODERATE           | c.1799T>A                                         | p.Val600Glu                                                    | 23024 | FALSE | chr7:140453136:A:T  | 220:chr7:140453136:A:T  | 0.004792 |
| 26_t2c2d1-1 | 26 | ALK             | MODERATE           | c.1307C>T                                         | p.Ala436Val                                                    | 1     | FALSE | chr2:29551323:G:A   | 220:chr2:29551323:G:A   | 0.003995 |
| 26_t2c2d1-1 | 26 | CDH1            | MODERATE           | c.2204C>T                                         | p.Ala735Val                                                    | 0     | FALSE | chr16:68862116:C:T  | 220:chr16:68862116:C:T  | 0.00312  |

|             |    |                 |                    |                                                                           |                                                                                            |   |       |                    |                        |          |
|-------------|----|-----------------|--------------------|---------------------------------------------------------------------------|--------------------------------------------------------------------------------------------|---|-------|--------------------|------------------------|----------|
| 26_t2c2d1-1 | 26 | PKD1;<br>TSC2   | MODIFIER; MODERATE | c.*13118C>T;<br>c.*13121C>T;<br>c.4192G>A;<br>c.4324G>A;<br>c.4393G>A     | p.Asp1398Asn;<br>p.Asp1442Asn;<br>p.Asp1465Asn                                             | 0 | FALSE | chr16:2134616:G:A  | 220:chr16:2134616:G:A  | 0.002743 |
| 26_t2c2d1-1 | 26 | EPHA3           | MODERATE           | c.2306G>A                                                                 | p.Arg769His                                                                                | 0 | FALSE | chr3:89480469:G:A  | 220:chr3:89480469:G:A  | 0.003185 |
| 26_t2c2d1-1 | 26 | FGFR1           | MODERATE           | c.292C>T;<br>c.298C>T;<br>c.541C>T;<br>c.559C>T;<br>c.565C>T;<br>c.658C>T | p.Arg98Cys;<br>p.Arg100Cys;<br>p.Arg181Cys;<br>p.Arg187Cys;<br>p.Arg189Cys;<br>p.Arg220Cys | 1 | FALSE | chr8:38285495:G:A  | 220:chr8:38285495:G:A  | 0.003215 |
| 26_t2c2d1-1 | 26 | APC             | HIGH               | c.1042C>T;<br>c.988C>T                                                    | p.Arg348*;<br>p.Arg330*                                                                    | 0 | FALSE | chr5:112154771:C:T | 220:chr5:112154771:C:T | 0.002911 |
| 26_t2c2d1-1 | 26 | HRAS;<br>LRRC56 | MODERATE; MODIFIER | c.175G>A;<br>c.-506C>T                                                    | p.Ala59Thr;                                                                                | 2 | FALSE | chr11:533881:C:T   | 220:chr11:533881:C:T   | 0.003384 |
| 26_t2c2d1-1 | 26 | FGFR4           | MODERATE           | c.1444G>A;<br>c.1528G>A;<br>c.1648G>A                                     | p.Val482Met;<br>p.Val510Met;<br>p.Val550Met                                                | 2 | FALSE | chr5:176522551:G:A | 220:chr5:176522551:G:A | 0.008032 |
| 26_t2c2d1-1 | 26 | MET             | MODERATE           | c.959C>T                                                                  | p.Ala320Val                                                                                | 1 | FALSE | chr7:116340097:C:T | 220:chr7:116340097:C:T | 0.002642 |
| 26_t2c2d1-1 | 26 | MET             | HIGH               | c.1619G>A                                                                 | p.Trp540*                                                                                  | 1 | FALSE | chr7:116380997:G:A | 220:chr7:116380997:G:A | 0.002635 |
| 26_t2c2d1-1 | 26 | NTRK1           | MODERATE           | c.1927G>A;<br>c.2017G>A;<br>c.2035G>A                                     | p.Asp643Asn;<br>p.Asp673Asn;<br>p.Asp679Asn                                                | 1 | FALSE | chr1:156849143:G:A | 220:chr1:156849143:G:A | 0.003717 |
| 26_t2c2d1-1 | 26 | PDGFRA          | MODERATE           | c.2152C>T                                                                 | p.Arg718Trp                                                                                | 1 | FALSE | chr4:55144678:C:T  | 220:chr4:55144678:C:T  | 0.003378 |
| 26_t2c2d1-1 | 26 | TP53            | MODERATE           | c.406C>T;<br>c.487C>T;<br>c.766C>T;<br>c.883C>T                           | p.Pro136Ser;<br>p.Pro163Ser;<br>p.Pro256Ser;<br>p.Pro295Ser                                | 2 | FALSE | chr17:7577055:G:A  | 220:chr17:7577055:G:A  | 0.003284 |



|              |    |        |                    |                                                                                                                                           |                                                                                                                                           |       |       |                             |                                 |          |
|--------------|----|--------|--------------------|-------------------------------------------------------------------------------------------------------------------------------------------|-------------------------------------------------------------------------------------------------------------------------------------------|-------|-------|-----------------------------|---------------------------------|----------|
| 26_t2c2d1-1  | 26 | FGFR2  | MODERATE; MODIFIER | c.1591G>A;<br>; c.1594G>A;<br>; c.1597G>A;<br>; c.1606G>A;<br>; c.1675G>A;<br>; c.1678G>A;<br>; c.1942G>A;<br>; c.1945G>A;<br>; n.2392G>A | p.Ala531Thr;<br>; p.Ala532Thr;<br>; p.Ala533Thr;<br>; p.Ala536Thr;<br>; p.Ala559Thr;<br>; p.Ala560Thr;<br>; p.Ala648Thr;<br>; p.Ala649Thr | 3     | FALSE | chr10:123<br>247549:C:T     | 220:chr10:<br>12324754<br>9:C:T | 0.003704 |
| 26_t2c2d1-1  | 26 | NTRK3  | MODERATE           | c.1351C>T;<br>; c.1375C>T                                                                                                                 | p.Arg451Trp;<br>; p.Arg459Trp                                                                                                             | 0     | FALSE | chr15:886<br>69523:G:A      | 220:chr15:<br>88669523:<br>G:A  | 0.003322 |
| 26_t2c2d1-1  | 26 | CTNNB1 | MODERATE           | c.1346G>A                                                                                                                                 | p.Arg449His                                                                                                                               | 0     | FALSE | chr3:4127<br>5180:G:A       | 220:chr3:4<br>1275180:G<br>:A   | 0.002681 |
| 26_t2c2d1-1  | 26 | EPHA3  | MODERATE           | c.1142G>A                                                                                                                                 | p.Arg381His                                                                                                                               | 0     | FALSE | chr3:8939<br>1076:G:A       | 220:chr3:8<br>9391076:G<br>:A   | 0.002821 |
| 26_t2c2d1-1  | 26 | CDH1   | MODERATE           | c.2074G>A                                                                                                                                 | p.Ala692Thr                                                                                                                               | 0     | FALSE | chr16:688<br>57439:G:A      | 220:chr16:<br>68857439:<br>G:A  | 0.002817 |
| 26_t2c2d1-1  | 26 | NF1    | HIGH               | c.3942G>A                                                                                                                                 | p.Trp1314*                                                                                                                                | 1     | FALSE | chr17:295<br>63007:G:A      | 220:chr17:<br>29563007:<br>G:A  | 0.002475 |
| 26_t2c1d1-12 | 26 | FGFR3  | MODERATE           | c.599G>A                                                                                                                                  | p.Arg200His                                                                                                                               | 1     | FALSE | chr4:1803<br>247:G:A        | 221:chr4:1<br>803247:G:<br>A    | 0.004608 |
| 26_t2c1d1-12 | 26 | APC    | MODERATE           | c.1708G>A;<br>; c.1762G>A                                                                                                                 | p.Val570Ile;<br>; p.Val588Ile                                                                                                             | 0     | FALSE | chr5:1121<br>70666:G:A      | 221:chr5:1<br>12170666:<br>G:A  | 0.003515 |
| 26_t2c1d1-12 | 26 | AKT1   | MODERATE           | c.458T>C                                                                                                                                  | p.Leu153Pro                                                                                                                               | 1     | FALSE | chr14:105<br>241522:A:<br>G | 221:chr14:<br>10524152<br>2:A:G | 0.003247 |
| 26_t2c1d1-12 | 26 | NTRK2  | MODERATE           | c.1984G>A;<br>; c.2032G>A                                                                                                                 | p.Ala662Thr;<br>; p.Ala678Thr                                                                                                             | 0     | FALSE | chr9:8757<br>0292:G:A       | 221:chr9:8<br>7570292:G<br>:A   | 0.003373 |
| 26_t2c1d1-12 | 26 | KDR    | HIGH               | c.3352C>T                                                                                                                                 | p.Arg1118*                                                                                                                                | 2     | FALSE | chr4:5595<br>5593:G:A       | 221:chr4:5<br>5955593:G<br>:A   | 0.002959 |
| 26_t2c1d1-12 | 26 | PTEN   | MODERATE           | c.389G>A                                                                                                                                  | p.Arg130Gln                                                                                                                               | 89    | FALSE | chr10:896<br>92905:G:A      | 221:chr10:<br>89692905:<br>G:A  | 0.003185 |
| 26_t2c1d1-12 | 26 | SMO    | MODERATE           | c.1640G>A                                                                                                                                 | p.Arg547His                                                                                                                               | 0     | FALSE | chr7:1288<br>50377:G:A      | 221:chr7:1<br>28850377:<br>G:A  | 0.003236 |
| 26_t2c1d1-12 | 26 | BRAF   | MODERATE           | c.1799T>A                                                                                                                                 | p.Val600Glu                                                                                                                               | 23024 | FALSE | chr7:1404<br>53136:A:T      | 221:chr7:1<br>40453136:<br>A:T  | 0.009317 |

|              |    |                                 |                             |                                                                             |                                                            |     |       |                             |                                 |          |
|--------------|----|---------------------------------|-----------------------------|-----------------------------------------------------------------------------|------------------------------------------------------------|-----|-------|-----------------------------|---------------------------------|----------|
| 26_t2c1d1-12 | 26 | CWH43                           | MODERATE                    | c.782G>A;<br>c.863G>A                                                       | p.Cys261Tyr<br>; p.Cys288Tyr                               | 0   | FALSE | chr4:4900<br>5812:G:A       | 221:chr4:4<br>9005812:G:A       | 0.003058 |
| 26_t2c1d1-12 | 26 | FOXL2;<br>FOXL2NB;<br>LINC01391 | MODERATE; MODIFIER          | c.205G>A;<br>c.-132C>T;<br>n.-1G>A                                          | p.Glu69Lys;                                                | 0   | FALSE | chr3:1386<br>65360:C:T      | 221:chr3:1<br>38665360:<br>C:T  | 0.003759 |
| 26_t2c1d1-12 | 26 | EGFR                            | MODERATE                    | c.3025G>A                                                                   | p.Asp1009A<br>sn                                           | 1   | FALSE | chr7:5526<br>8959:G:A       | 221:chr7:5<br>5268959:G<br>:A   | 0.003322 |
| 26_t2c1d1-12 | 26 | TP53                            | MODERATE                    | c.229T>C;<br>c.310T>C;<br>c.589T>C;<br>c.706T>C                             | p.Tyr77His;<br>p.Tyr104His;<br>p.Tyr197His;<br>p.Tyr236His | 18  | FALSE | chr17:757<br>7575:A:G       | 221:chr17:<br>7577575:A<br>:G   | 0.003155 |
| 26_t2c1d1-12 | 26 | APC                             | MODIFIER; MODERATE          | c.676-<br>8784G>A;<br>c.695G>A                                              | ; p.Arg232Gln                                              | 0   | FALSE | chr5:1121<br>28192:G:A      | 221:chr5:1<br>12128192:<br>G:A  | 0.003591 |
| 26_t2c1d1-12 | 26 | FGFR2                           | MODIFIER; MODERATE          | c.110-<br>14065C>T;<br>c.110-<br>945C>T;<br>n.757-<br>14065C>T;<br>c.290C>T | ; p.Ala97Val                                               | 1   | FALSE | chr10:123<br>325038:G:<br>A | 221:chr10:<br>12332503<br>8:G:A | 0.003317 |
| 26_t2c1d1-12 | 26 | HOXD-AS2;<br>HOXD8              | MODIFIER; MODERATE          | n.*692G>T<br>; c.22C>A;<br>c.574C>A                                         | ; p.Gln8Lys;<br>p.Gln192Lys                                | 0   | FALSE | chr2:1769<br>95668:C:A      | 221:chr2:1<br>76995668:<br>C:A  | 0.005263 |
| 26_t2c1d1-12 | 26 | C9orf53;<br>CDKN2A              | MODIFIER; MODERATE;<br>HIGH | n.*616G>A<br>;<br>c.*161C>T;<br>c.281C>T;<br>c.238C>T                       | ; p.Pro94Leu;<br>p.Arg80*                                  | 124 | FALSE | chr9:2197<br>1120:G:A       | 221:chr9:2<br>1971120:G<br>:A   | 0.014409 |
| 26_t2c1d1-12 | 26 | NOTCH1                          | MODERATE                    | c.5585C>T                                                                   | p.Pro1862Le<br>u                                           | 0   | FALSE | chr9:1393<br>96253:G:A      | 221:chr9:1<br>39396253:<br>G:A  | 0.003891 |
| 26_t2c1d1-12 | 26 | TSC2                            | MODERATE                    | c.781C>T                                                                    | p.Arg261Trp                                                | 0   | FALSE | chr16:210<br>7112:C:T       | 221:chr16:<br>2107112:C<br>:T   | 0.005464 |
| 26_t2c1d1-12 | 26 | MIR4673;<br>NOTCH1              | MODIFIER; MODERATE          | n.*59G>A;<br>c.1058G>A                                                      | ; p.Arg353His                                              | 0   | FALSE | chr9:1394<br>13084:C:T      | 221:chr9:1<br>39413084:<br>C:T  | 0.003759 |
| 26_t2c1d1-12 | 26 | C9orf53;<br>CDKN2A              | MODIFIER; MODERATE;<br>LOW  | n.*616G>A<br>;<br>c.*276C>T;<br>c.353C>T;<br>c.396C>T                       | ; p.Ala118Val;<br>p.Gly132Gly                              | 1   | FALSE | chr9:2197<br>1005:G:A       | 221:chr9:2<br>1971005:G<br>:A   | 0.004866 |

|              |    |                 |                    |                                                     |                                                             |       |       |                    |                        |          |
|--------------|----|-----------------|--------------------|-----------------------------------------------------|-------------------------------------------------------------|-------|-------|--------------------|------------------------|----------|
| 26_t2c1d1-12 | 26 | FGFR4           | MODERATE           | c.784G>A                                            | p.Val262Met                                                 | 1     | FALSE | chr5:176519378:G:A | 221:chr5:176519378:G:A | 0.004338 |
| 26_t2c1d15   | 26 | TP53            | MODERATE; MODIFIER | c.100G>A;<br>c.217G>A;<br>c.-279G>A;<br>c.-360G>A   | p.Val34Met;<br>p.Val73Met;                                  | 5     | FALSE | chr17:7579470:C:T  | 222:chr17:7579470:C:T  | 0.00463  |
| 26_t2c1d15   | 26 | CDH1            | MODERATE           | c.1093G>A                                           | p.Val365Ile                                                 | 0     | FALSE | chr16:68846122:G:A | 222:chr16:68846122:G:A | 0.002472 |
| 26_t2c1d15   | 26 | PDGFRA          | MODERATE           | c.1738C>A                                           | p.Leu580Met                                                 | 1     | FALSE | chr4:55141092:C:A  | 222:chr4:55141092:C:A  | 0.004274 |
| 26_t2c1d15   | 26 | KDR             | MODERATE           | c.3065G>A                                           | p.Arg1022Gln                                                | 1     | FALSE | chr4:55958788:C:T  | 222:chr4:55958788:C:T  | 0.003236 |
| 26_t2c1d15   | 26 | TSC2            | MODIFIER; MODERATE | c.2837+1108G>A;<br>c.2933G>A                        | p.Arg978His                                                 | 0     | FALSE | chr16:2127694:G:A  | 222:chr16:2127694:G:A  | 0.003597 |
| 26_t2c1d15   | 26 | IDH2;<br>ZNF710 | MODERATE; MODIFIER | c.1091C>T;<br>c.1247C>T;<br>c.857C>T;<br>c.*2147G>A | p.Ala364Val;<br>p.Ala416Val;<br>p.Ala286Val;                | 1     | FALSE | chr15:90628072:G:A | 222:chr15:90628072:G:A | 0.003623 |
| 26_t2c1d15   | 26 | AR              | MODERATE           | c.1789G>A;<br>c.193G>A                              | p.Ala597Thr;<br>p.Ala65Thr                                  | 0     | FALSE | chrX:66905872:G:A  | 222:chrX:66905872:G:A  | 0.005814 |
| 26_t2c1d15   | 26 | MET             | MODERATE           | c.1640G>A                                           | p.Arg547Gln                                                 | 1     | FALSE | chr7:116381018:G:A | 222:chr7:116381018:G:A | 0.002372 |
| 26_t2c1d15   | 26 | BRAF            | MODERATE           | c.1799T>A                                           | p.Val600Glu                                                 | 23024 | FALSE | chr7:140453136:A:T | 222:chr7:140453136:A:T | 0.003049 |
| 26_t2c1d15   | 26 | PIK3R1          | MODERATE           | c.1082G>A;<br>c.1271G>A;<br>c.1361G>A;<br>c.2171G>A | p.Arg361Gln;<br>p.Arg424Gln;<br>p.Arg454Gln;<br>p.Arg724Gln | 1     | FALSE | chr5:67593425:G:A  | 222:chr5:67593425:G:A  | 0.002326 |
| 26_t2c1d15   | 26 | DDR2            | MODERATE           | c.2038C>T                                           | p.Arg680Cys                                                 | 1     | FALSE | chr1:162745623:C:T | 222:chr1:162745623:C:T | 0.002378 |
| 26_t2c1d15   | 26 | KIT             | LOW                | c.1869G>A;<br>c.1881G>A                             | p.Pro623Pro;<br>p.Pro627Pro                                 | 1     | FALSE | chr4:55594178:G:A  | 222:chr4:55594178:G:A  | 0.003236 |
| 26_t2c1d15   | 26 | KDR             | MODERATE           | c.1028C>T                                           | p.Thr343Met                                                 | 3     | FALSE | chr4:55976884:G:A  | 222:chr4:55976884:G:A  | 0.001934 |

|            |    |                           |                    |                                                                                    |                                                            |    |       |                     |                         |          |
|------------|----|---------------------------|--------------------|------------------------------------------------------------------------------------|------------------------------------------------------------|----|-------|---------------------|-------------------------|----------|
| 26_t2c1d15 | 26 | PDGFRA                    | MODERATE           | c.2692G>A                                                                          | p.Gly898Ser                                                | 1  | FALSE | chr4:55154983:G:A   | 222:chr4:55154983:G:A   | 0.002732 |
| 26_t2c1d15 | 26 | TP53                      | MODERATE           | c.224A>G;<br>c.305A>G;<br>c.584A>G;<br>c.701A>G                                    | p.Tyr75Cys;<br>p.Tyr102Cys;<br>p.Tyr195Cys;<br>p.Tyr234Cys | 94 | FALSE | chr17:757580:T:C    | 222:chr17:757580:T:C    | 0.003968 |
| 26_t2c1d15 | 26 | RET                       | MODERATE           | c.1385C>T                                                                          | p.Ser462Leu                                                | 1  | FALSE | chr10:43606776:C:T  | 222:chr10:43606776:C:T  | 0.002577 |
| 26_t2c1d15 | 26 | MET                       | HIGH               | c.1619G>A                                                                          | p.Trp540*                                                  | 1  | FALSE | chr7:116380997:G:A  | 222:chr7:116380997:G:A  | 0.002577 |
| 26_t2c1d15 | 26 | NOTCH1                    | MODERATE           | c.4252G>A                                                                          | p.Ala1418Thr                                               | 0  | FALSE | chr9:139400096:C:T  | 222:chr9:139400096:C:T  | 0.004008 |
| 26_t2c1d15 | 26 | MIR1225;<br>PKD1;<br>TSC2 | MODIFIER; MODERATE | n.*90C>T;<br>c.*13118C>T;<br>c.*13121C>T;<br>c.4954G>A;<br>c.5086G>A;<br>c.5155G>A | p.Ala1652Thr;<br>p.Ala1696Thr;<br>p.Ala1719Thr             | 0  | FALSE | chr16:2138135:G:A   | 222:chr16:2138135:G:A   | 0.002937 |
| 26_t2c1d15 | 26 | ATM                       | MODERATE           | c.8275C>T                                                                          | p.Pro2759Ser                                               | 0  | FALSE | chr11:108213955:C:T | 222:chr11:108213955:C:T | 0.00365  |
| 26_t2c1d15 | 26 | ATM                       | MODERATE           | c.2075G>A                                                                          | p.Arg692His                                                | 0  | FALSE | chr11:108124717:G:A | 222:chr11:108124717:G:A | 0.00271  |
| 26_t2c1d15 | 26 | MET                       | MODERATE           | c.788C>T                                                                           | p.Thr263Met                                                | 1  | FALSE | chr7:116339926:C:T  | 222:chr7:116339926:C:T  | 0.002667 |
| 26_t2c1d15 | 26 | ALK                       | MODERATE           | c.617C>T                                                                           | p.Ala206Val                                                | 2  | FALSE | chr2:30142909:G:A   | 222:chr2:30142909:G:A   | 0.004545 |
| 26_t2c1d15 | 26 | GNA11                     | MODERATE           | c.440G>A                                                                           | p.Arg147His                                                | 1  | FALSE | chr19:3113446:G:A   | 222:chr19:3113446:G:A   | 0.003413 |
| 26_t2c1d15 | 26 | PTEN                      | MODERATE           | c.389G>A                                                                           | p.Arg130Gln                                                | 89 | FALSE | chr10:89692905:G:A  | 222:chr10:89692905:G:A  | 0.002941 |
| 26_t2c1d15 | 26 | ALK                       | MODERATE           | c.446C>T                                                                           | p.Ala149Val                                                | 1  | FALSE | chr2:30143080:G:A   | 222:chr2:30143080:G:A   | 0.003636 |
| 26_t2c1d15 | 26 | HRAS;<br>LRRCS6           | MODERATE; MODIFIER | c.404G>A;<br>c.-506C>T                                                             | p.Arg135Gln                                                | 1  | FALSE | chr11:533499:C:T    | 222:chr11:533499:C:T    | 0.002981 |
| 26_t2c1d15 | 26 | EGFR;<br>EGFR-AS1         | MODERATE; MODIFIER | c.2356G>A;<br>n.1206C>T                                                            | p.Val786Met                                                | 6  | FALSE | chr7:55249058:G:A   | 222:chr7:55249058:G:A   | 0.00271  |

|            |     |        |                    |                                                                                                        |                                                                            |     |       |                    |                        |          |
|------------|-----|--------|--------------------|--------------------------------------------------------------------------------------------------------|----------------------------------------------------------------------------|-----|-------|--------------------|------------------------|----------|
| 26_t2c1d15 | 26  | TP53   | MODERATE           | c.128G>A;<br>c.407G>A;<br>c.47G>A;<br>c.524G>A                                                         | p.Arg43His;<br>p.Arg136His;<br>;<br>p.Arg16His;<br>p.Arg175His             | 979 | FALSE | chr17:7578406:C:T  | 222:chr17:7578406:C:T  | 0.002946 |
| 26_t2c1d15 | 26  | NF1    | MODERATE           | c.4463G>A;<br>;<br>c.4526G>A                                                                           | p.Arg1488His;<br>;<br>p.Arg1509His                                         | 1   | FALSE | chr17:29587482:G:A | 222:chr17:29587482:G:A | 0.003072 |
| 26_t2c1d15 | 26  | TP53   | MODIFIER; MODERATE | c.-2C>T;<br>c.359C>T;<br>c.476C>T;<br>c.80C>T                                                          | ;<br>p.Ala120Val;<br>p.Ala159Val;<br>p.Ala27Val                            | 41  | FALSE | chr17:7578454:G:A  | 222:chr17:7578454:G:A  | 0.00313  |
| 26_t2c1d15 | 26  | NTRK2  | MODERATE           | c.220G>A                                                                                               | p.Ala74Thr                                                                 | 0   | FALSE | chr9:87317081:G:A  | 222:chr9:87317081:G:A  | 0.004049 |
| 26_t2c1d15 | 26  | NTRK2  | MODERATE           | c.1981G>A;<br>;<br>c.2029G>A                                                                           | p.Ala661Thr;<br>;<br>p.Ala677Thr                                           | 0   | FALSE | chr9:87570289:G:A  | 222:chr9:87570289:G:A  | 0.003101 |
| 26_t2c1d15 | 26  | TP53   | MODIFIER; MODERATE | c.*137A>G;<br>;<br>c.*225A>G;<br>;<br>c.1001A>G;<br>;<br>c.1118A>G;<br>;<br>c.641A>G;<br>;<br>c.722A>G | p.Lys334Arg;<br>;<br>p.Lys373Arg;<br>;<br>p.Lys214Arg;<br>;<br>p.Lys241Arg | 1   | FALSE | chr17:7572991:T:C  | 222:chr17:7572991:T:C  | 0.004975 |
| 26_t2c1d15 | 26  | TSC1   | MODERATE           | c.1547C>T;<br>c.1697C>T;<br>c.1700C>T                                                                  | p.Ala516Val;<br>p.Ala566Val;<br>p.Ala567Val                                | 0   | FALSE | chr9:135781265:G:A | 222:chr9:135781265:G:A | 0.002389 |
| 26_t2c1d15 | 26  | FGFR3  | MODERATE           | c.1183G>A;<br>;<br>c.1519G>A;<br>;<br>c.1525G>A                                                        | p.Val395Met;<br>p.Val507Met;<br>p.Val509Met                                | 1   | FALSE | chr4:1807188:G:A   | 222:chr4:1807188:G:A   | 0.00404  |
| 131_c1w3-2 | 131 | BRAF   | MODERATE           | c.1202C>T                                                                                              | p.Thr401Ile                                                                | 1   | FALSE | chr7:140482933:G:A | 228:chr7:140482933:G:A | 0.005988 |
| 131_c1w3-2 | 131 | EGFR   | MODERATE           | c.755G>A                                                                                               | p.Arg252His                                                                | 3   | FALSE | chr7:55221711:G:A  | 228:chr7:55221711:G:A  | 0.005848 |
| 131_c1w3-2 | 131 | KIT    | MODERATE           | c.1460G>A                                                                                              | p.Gly487Asp                                                                | 1   | FALSE | chr4:55592136:G:A  | 228:chr4:55592136:G:A  | 0.003861 |
| 131_c1w3-2 | 131 | PIK3CA | MODERATE           | c.2594G>A                                                                                              | p.Gly865Asp                                                                | 1   | FALSE | chr3:178947158:G:A | 228:chr3:178947158:G:A | 0.003578 |

|            |     |                |                    |                                               |                                                     |   |       |                             |                                 |          |
|------------|-----|----------------|--------------------|-----------------------------------------------|-----------------------------------------------------|---|-------|-----------------------------|---------------------------------|----------|
| 131_c1w3-2 | 131 | ESR1           | MODERATE           | c.719G>A;<br>c.725G>A                         | p.Cys240Tyr<br>;<br>p.Cys242Tyr                     | 0 | FALSE | chr6:1522<br>01865:G:A      | 228:chr6:1<br>52201865:<br>G:A  | 0.003578 |
| 131_c1w3-2 | 131 | EGFR           | MODIFIER; MODERATE | c.*1464G><br>A;<br>c.1321G>A                  | p.Val441Ile                                         | 1 | FALSE | chr7:5522<br>7854:G:A       | 228:chr7:5<br>5227854:G<br>:A   | 0.003817 |
| 131_c1w3-2 | 131 | ALK            | MODERATE           | c.956C>T                                      | p.Ser319Phe                                         | 2 | FALSE | chr2:2975<br>4979:G:A       | 228:chr2:2<br>9754979:G<br>:A   | 0.00381  |
| 131_c1w3-2 | 131 | PIK3CA         | MODERATE           | c.35G>A                                       | p.Gly12Asp                                          | 5 | FALSE | chr3:1789<br>16648:G:A      | 228:chr3:1<br>78916648:<br>G:A  | 0.003086 |
| 131_c1w3-2 | 131 | APC            | MODERATE           | c.1708G>A<br>;<br>c.1762G>A                   | p.Val570Ile;<br>p.Val588Ile                         | 0 | FALSE | chr5:1121<br>70666:G:A      | 228:chr5:1<br>12170666:<br>G:A  | 0.003922 |
| 131_c1w3-2 | 131 | FBXW7          | MODERATE           | c.1039C>T;<br>c.1153C>T;<br>c.1393C>T         | p.Arg347Cys<br>;<br>p.Arg385Cys<br>;<br>p.Arg465Cys | 0 | FALSE | chr4:1532<br>49385:G:A      | 228:chr4:1<br>53249385:<br>G:A  | 0.003711 |
| 131_c1w3-2 | 131 | NTHL1;<br>TSC2 | MODIFIER; MODERATE | c.-20C>T;<br>c.170G>A                         | p.Arg57His                                          | 0 | FALSE | chr16:210<br>0432:G:A       | 228:chr16:<br>2100432:G<br>:A   | 0.004211 |
| 131_c1w3-2 | 131 | EPHA3          | MODERATE           | c.1646C>T                                     | p.Ala549Val                                         | 0 | FALSE | chr3:8945<br>6470:C:T       | 228:chr3:8<br>9456470:C<br>:T   | 0.004115 |
| 131_c1w3-2 | 131 | EPHA3          | MODERATE           | c.1543G>A                                     | p.Ala515Thr                                         | 0 | FALSE | chr3:8944<br>8579:G:A       | 228:chr3:8<br>9448579:G<br>:A   | 0.004049 |
| 131_c1w3-2 | 131 | AKT3           | MODERATE           | c.899C>T                                      | p.Ala300Val                                         | 0 | FALSE | chr1:2437<br>27071:G:A      | 228:chr1:2<br>43727071:<br>G:A  | 0.003401 |
| 131_c1w3-2 | 131 | TSC2           | MODERATE           | c.2702G>A                                     | p.Arg901His                                         | 0 | FALSE | chr16:212<br>6131:G:A       | 228:chr16:<br>2126131:G<br>:A   | 0.005859 |
| 131_c1w3-2 | 131 | ATM            | MODERATE           | c.7330G>A                                     | p.Glu2444Lys                                        | 0 | FALSE | chr11:108<br>200963:G:<br>A | 228:chr11:<br>10820096<br>3:G:A | 0.003466 |
| 131_c1w3-2 | 131 | ESR1           | MODERATE           | c.1171G>A<br>;<br>c.1174G>A<br>;<br>c.1180G>A | p.Val391Ile;<br>p.Val392Ile;<br>p.Val394Ile         | 0 | FALSE | chr6:1523<br>32868:G:A      | 228:chr6:1<br>52332868:<br>G:A  | 0.003515 |
| 131_c1w3-2 | 131 | NTRK3          | MODERATE           | c.1463C>T;<br>c.1487C>T                       | p.Ala488Val;<br>p.Ala496Val                         | 0 | FALSE | chr15:885<br>76186:G:A      | 228:chr15:<br>88576186:<br>G:A  | 0.005376 |
| 130_c1w2-1 | 130 | CDKN2A         | MODIFIER; HIGH     | c.194-<br>3575G>A;<br>c.45G>A                 | p.Trp15*                                            | 3 | FALSE | chr9:2197<br>4782:C:T       | 238:chr9:2<br>1974782:C<br>:T   | 0.004367 |

|            |     |                             |                            |                                                                                                                      |                                                                                                                 |    |       |                             |                                 |          |
|------------|-----|-----------------------------|----------------------------|----------------------------------------------------------------------------------------------------------------------|-----------------------------------------------------------------------------------------------------------------|----|-------|-----------------------------|---------------------------------|----------|
| 130_c1w2-1 | 130 | FBXW7                       | MODERATE                   | c.232A>T;<br>c.346A>T;<br>c.586A>T                                                                                   | p.Thr78Ser;<br>p.Thr116Ser<br>;<br>p.Thr196Ser                                                                  | 0  | FALSE | chr4:1532<br>68222:T:A      | 238:chr4:1<br>53268222:<br>T:A  | 0.021807 |
| 130_c1w2-1 | 130 | ATM                         | HIGH                       | c.5623C>T                                                                                                            | p.Arg1875*                                                                                                      | 0  | FALSE | chr11:108<br>175528:C:<br>T | 238:chr11:<br>10817552<br>8:C:T | 0.003509 |
| 130_c1w2-1 | 130 | FGFR1                       | MODERATE                   | c.475C>T;<br>c.481C>T;<br>c.724C>T;<br>c.742C>T;<br>c.748C>T;<br>c.841C>T                                            | p.Arg159Trp<br>;<br>p.Arg161Trp<br>;<br>p.Arg242Trp<br>;<br>p.Arg248Trp<br>;<br>p.Arg250Trp<br>;<br>p.Arg281Trp | 2  | FALSE | chr8:3828<br>2215:G:A       | 238:chr8:3<br>8282215:G<br>:A   | 0.002454 |
| 130_c1w2-1 | 130 | C9orf53;<br>CDKN2A          | MODIFIER; MODERATE;<br>LOW | n.*616T>G<br>;<br>c.*120A>C<br>;<br>c.197A>C;<br>c.240A>C                                                            | p.His66Pro;<br>p.Pro80Pro                                                                                       | 1  | FALSE | chr9:2197<br>1161:T:G       | 238:chr9:2<br>1971161:T<br>:G   | 0.035422 |
| 130_c1w2-1 | 130 | ERBB2;<br>MIEN1;<br>MIR4728 | MODIFIER; MODERATE         | c.3160-<br>213A>G;<br>c.3251A>G<br>;<br>c.3296A>G<br>;<br>c.3341A>G<br>;<br>n.3665A>G<br>;<br>c.*388T>C;<br>n.*67A>G | p.Glu1084Gl<br>y;<br>p.Glu1099Gl<br>y;<br>p.Glu1114Gl<br>y                                                      | 1  | FALSE | chr17:378<br>83729:A:G      | 238:chr17:<br>37883729:<br>A:G  | 0.00314  |
| 130_c1w2-1 | 130 | SMO                         | MODERATE                   | c.1045A>C                                                                                                            | p.Thr349Pro                                                                                                     | 0  | FALSE | chr7:1288<br>46115:A:C      | 238:chr7:1<br>28846115:<br>A:C  | 0.00753  |
| 130_c1w2-1 | 130 | TP53                        | MODIFIER; MODERATE         | c.-15A>C;<br>c.346A>C;<br>c.463A>C;<br>c.67A>C                                                                       | p.Thr116Pro<br>;<br>p.Thr155Pro<br>;<br>p.Thr23Pro                                                              | 17 | FALSE | chr17:757<br>8467:T:G       | 238:chr17:<br>7578467:T<br>:G   | 0.004438 |
| 130_c1w2-1 | 130 | IGF1R                       | MODERATE                   | c.3934T>C;<br>c.3937T>C                                                                                              | p.Ser1312Pr<br>o;<br>p.Ser1313Pr<br>o                                                                           | 0  | FALSE | chr15:995<br>00504:T:C      | 238:chr15:<br>99500504:<br>T:C  | 0.004754 |
| 130_c1w2-1 | 130 | PIK3CA                      | MODERATE                   | c.1022C>T                                                                                                            | p.Ala341Val                                                                                                     | 2  | FALSE | chr3:1789<br>21540:C:T      | 238:chr3:1<br>78921540:<br>C:T  | 0.003221 |

|          |     |                             |                    |                                                                                                    |                                             |       |       |                    |                        |          |
|----------|-----|-----------------------------|--------------------|----------------------------------------------------------------------------------------------------|---------------------------------------------|-------|-------|--------------------|------------------------|----------|
| 132_c2-1 | 132 | IGF1R                       | MODERATE           | c.3934T>C;<br>c.3937T>C                                                                            | p.Ser1312Pro;<br>p.Ser1313Pro               | 0     | FALSE | chr15:99500504:T:C | 239:chr15:99500504:T:C | 0.005295 |
| 132_c2-1 | 132 | FGFR4                       | MODERATE           | c.1745G>A;<br>c.1829G>A;<br>c.1949G>A                                                              | p.Arg582His;<br>p.Arg610His;<br>p.Arg650His | 1     | FALSE | chr5:176523292:G:A | 239:chr5:176523292:G:A | 0.00227  |
| 132_c2-1 | 132 | CSDE1;<br>NRAS              | MODIFIER; MODERATE | c.*2430A>G;<br>c.*2523A>G;<br>c.*2817A>G;<br>c.*2910A>G;<br>c.*2964A>G;<br>c.*3057A>G;<br>c.182A>G | p.Gln61Arg                                  | 1103  | FALSE | chr1:115256529:T:C | 239:chr1:15256529:T:C  | 0.00388  |
| 132_c2-1 | 132 | BRAF                        | MODERATE           | c.1799T>A                                                                                          | p.Val600Glu                                 | 23024 | FALSE | chr7:140453136:A:T | 239:chr7:140453136:A:T | 0.05667  |
| 132_c2-1 | 132 | GNA11                       | MODERATE           | c.548G>A                                                                                           | p.Arg183His                                 | 1     | FALSE | chr19:3115013:G:A  | 239:chr19:3115013:G:A  | 0.001709 |
| 132_c2-1 | 132 | KIT                         | MODERATE           | c.2855G>A;<br>c.2867G>A                                                                            | p.Arg952Gln;<br>p.Arg956Gln                 | 3     | FALSE | chr4:55604659:G:A  | 239:chr4:55604659:G:A  | 0.001736 |
| 132_c2-1 | 132 | NOTCH1                      | MODERATE           | c.5777G>A                                                                                          | p.Arg1926His                                | 0     | FALSE | chr9:139395161:C:T | 239:chr9:139395161:C:T | 0.001908 |
| 132_c2-1 | 132 | ERBB2;<br>MIEN1;<br>MIR4728 | MODERATE; MODIFIER | c.2512C>T;<br>c.2557C>T;<br>c.2602C>T;<br>n.2926C>T;<br>c.*388G>A;<br>n.-1C>T                      | p.Arg838Trp;<br>p.Arg853Trp;<br>p.Arg868Trp | 1     | FALSE | chr17:37881410:C:T | 239:chr17:37881410:C:T | 0.001546 |
| 132_c2-1 | 132 | C9orf53;<br>CDKN2A          | MODIFIER; MODERATE | n.*616C>G;<br>c.*140G>C;<br>c.217G>C;<br>c.260G>C                                                  | p.Ala73Pro;<br>p.Arg87Pro                   | 1     | FALSE | chr9:21971141:C:G  | 239:chr9:21971141:C:G  | 0.003899 |
| 132_c2-1 | 132 | KDR                         | MODERATE           | c.2323G>T                                                                                          | p.Ala775Ser                                 | 1     | FALSE | chr4:55964914:C:A  | 239:chr4:55964914:C:A  | 0.001524 |
| 132_c2-1 | 132 | RET                         | MODERATE           | c.2116G>A                                                                                          | p.Val706Met                                 | 2     | FALSE | chr10:43610164:G:A | 239:chr10:43610164:G:A | 0.001999 |



|          |     |        |                    |                                                   |                                                     |    |       |                             |                                 |          |
|----------|-----|--------|--------------------|---------------------------------------------------|-----------------------------------------------------|----|-------|-----------------------------|---------------------------------|----------|
| 132_c2-1 | 132 | BRAF   | MODERATE           | c.2173C>T                                         | p.His725Tyr                                         | 1  | FALSE | chr7:1404<br>34525:G:A      | 239:chr7:1<br>40434525:<br>G:A  | 0.002246 |
| 132_c2-1 | 132 | PIK3CA | MODERATE           | c.3059C>T                                         | p.Ala1020Val                                        | 4  | FALSE | chr3:1789<br>52004:C:T      | 239:chr3:1<br>78952004:<br>C:T  | 0.001437 |
| 132_c2-1 | 132 | FBXW7  | MODERATE           | c.232A>T;<br>c.346A>T;<br>c.586A>T                | p.Thr78Ser;<br>p.Thr116Ser<br>;<br>p.Thr196Ser      | 0  | FALSE | chr4:1532<br>68222:T:A      | 239:chr4:1<br>53268222:<br>T:A  | 0.00652  |
| 132_c2-1 | 132 | FLT3   | MODERATE           | c.2146G>A                                         | p.Glu716Lys                                         | 0  | FALSE | chr13:286<br>01286:C:T      | 239:chr13:<br>28601286:<br>C:T  | 0.002725 |
| 132_c2-1 | 132 | TP53   | MODERATE; MODIFIER | c.128C>T;<br>c.245C>T;<br>c.-279C>T;<br>c.-360C>T | p.Pro43Leu;<br>p.Pro82Leu;                          | 6  | FALSE | chr17:757<br>9442:G:A       | 239:chr17:<br>7579442:G<br>:A   | 0.002081 |
| 132_c2-1 | 132 | PTEN   | MODERATE           | c.518G>A                                          | p.Arg173His                                         | 27 | FALSE | chr10:897<br>11900:G:A      | 239:chr10:<br>89711900:<br>G:A  | 0.001953 |
| 132_c2-1 | 132 | NTRK1  | MODERATE           | c.804C>G;<br>c.894C>G                             | p.His268Gln<br>;<br>p.His298Gln                     | 1  | FALSE | chr1:1568<br>43468:C:G      | 239:chr1:1<br>56843468:<br>C:G  | 0.00186  |
| 132_c2-1 | 132 | ATM    | HIGH               | c.5623C>T                                         | p.Arg1875*                                          | 0  | FALSE | chr11:108<br>175528:C:<br>T | 239:chr1:1<br>10817552<br>8:C:T | 0.002193 |
| 132_c2-1 | 132 | VHL    | MODIFIER; MODERATE | c.341-<br>3270A>C;<br>c.344A>C                    | ;<br>p.His115Pro                                    | 0  | FALSE | chr3:1018<br>8201:A:C       | 239:chr3:1<br>0188201:A<br>:C   | 0.00183  |
| 132_c2-1 | 132 | NTRK1  | MODERATE           | c.1940T>G<br>;<br>c.2030T>G<br>;<br>c.2048T>G     | p.Val647Gly;<br>p.Val677Gly;<br>p.Val683Gly         | 2  | FALSE | chr1:1568<br>49792:T:G      | 239:chr1:1<br>56849792:<br>T:G  | 0.021277 |
| 132_c2-1 | 132 | PIK3R1 | MODERATE           | c.386C>T                                          | p.Pro129Leu                                         | 1  | FALSE | chr5:6756<br>9269:C:T       | 239:chr5:6<br>7569269:C<br>:T   | 0.001899 |
| 132_c2-1 | 132 | SMO    | MODERATE           | c.508A>C                                          | p.Thr170Pro                                         | 0  | FALSE | chr7:1288<br>43401:A:C      | 239:chr7:1<br>28843401:<br>A:C  | 0.002322 |
| 132_c2-1 | 132 | PIK3R1 | HIGH               | c.1630A>T;<br>c.541A>T;<br>c.730A>T;<br>c.820A>T  | p.Arg544*;<br>p.Arg181*;<br>p.Arg244*;<br>p.Arg274* | 1  | FALSE | chr5:6759<br>1037:A:T       | 239:chr5:6<br>7591037:A<br>:T   | 0.001668 |
| 73_c2-1  | 73  | KDR    | MODERATE           | c.1028C>T                                         | p.Thr343Met                                         | 3  | FALSE | chr4:5597<br>6884:G:A       | 240:chr4:5<br>5976884:G<br>:A   | 0.00346  |

|         |    |                    |                            |                                                   |                                                         |    |       |                             |                                 |          |
|---------|----|--------------------|----------------------------|---------------------------------------------------|---------------------------------------------------------|----|-------|-----------------------------|---------------------------------|----------|
| 73_c2-1 | 73 | NTRK1              | MODERATE                   | c.1940T>G;<br>c.2030T>G;<br>c.2048T>G             | p.Val647Gly;<br>p.Val677Gly;<br>p.Val683Gly             | 2  | FALSE | chr1:1568<br>49792:T:G      | 240:chr1:1<br>56849792:<br>T:G  | 0.025381 |
| 73_c2-1 | 73 | C9orf53;<br>CDKN2A | MODIFIER; MODERATE         | n.*616C>T;<br>c.*245G>A;<br>c.322G>A;<br>c.365G>A | p.Asp108Asn;<br>p.Arg122Gln                             | 14 | FALSE | chr9:2197<br>1036:C:T       | 240:chr9:2<br>1971036:C<br>:T   | 0.015038 |
| 73_c2-1 | 73 | KDR                | MODERATE                   | c.1588T>A                                         | p.Cys530Ser                                             | 1  | FALSE | chr4:5597<br>2056:A:T       | 240:chr4:5<br>5972056:A<br>:T   | 0.010169 |
| 73_c2-1 | 73 | ATM                | MODERATE                   | c.7328G>A                                         | p.Arg2443Gln                                            | 0  | FALSE | chr11:108<br>200961:G<br>A  | 240:chr11:<br>10820096<br>1:G:A | 0.006873 |
| 73_c2-1 | 73 | TP53               | MODERATE                   | c.107A>C;<br>c.26A>C;<br>c.386A>C;<br>c.503A>C    | p.His36Pro;<br>p.His9Pro;<br>p.His129Pro<br>p.His168Pro | 15 | FALSE | chr17:757<br>8427:T:G       | 240:chr17:<br>7578427:T<br>:G   | 0.008    |
| 69_c5-1 | 69 | PDGFRA             | MODERATE                   | c.1955G>T                                         | p.Gly652Val                                             | 1  | FALSE | chr4:5514<br>4126:G:T       | 241:chr4:5<br>5144126:G<br>:T   | 0.001512 |
| 69_c5-1 | 69 | NOTCH1             | MODERATE                   | c.4571C>T                                         | p.Ala1524Val                                            | 0  | FALSE | chr9:1393<br>99777:G:A      | 241:chr9:1<br>39399777:<br>G:A  | 0.001817 |
| 69_c5-1 | 69 | C9orf53;<br>CDKN2A | MODIFIER; MODERATE         | n.*616C>G;<br>c.*140G>C;<br>c.217G>C;<br>c.260G>C | p.Ala73Pro;<br>p.Arg87Pro                               | 1  | FALSE | chr9:2197<br>1141:C:G       | 241:chr9:2<br>1971141:C<br>:G   | 0.007273 |
| 69_c5-1 | 69 | C9orf53;<br>CDKN2A | MODIFIER; MODERATE;<br>LOW | n.*616T>G;<br>c.*120A>C;<br>c.197A>C;<br>c.240A>C | p.His66Pro;<br>p.Pro80Pro                               | 1  | FALSE | chr9:2197<br>1161:T:G       | 241:chr9:2<br>1971161:T<br>:G   | 0.035511 |
| 69_c5-1 | 69 | KIT                | MODERATE                   | c.13C>T                                           | p.Arg5Cys                                               | 1  | FALSE | chr4:5552<br>4194:C:T       | 241:chr4:5<br>5524194:C<br>:T   | 0.001907 |
| 69_c5-1 | 69 | ATM                | MODERATE                   | c.2803A>G                                         | p.Thr935Ala                                             | 0  | FALSE | chr11:108<br>139301:A:<br>G | 241:chr11:<br>10813930<br>1:A:G | 0.001618 |

|         |    |                           |                    |                                                           |                                                     |       |       |                        |                                |          |
|---------|----|---------------------------|--------------------|-----------------------------------------------------------|-----------------------------------------------------|-------|-------|------------------------|--------------------------------|----------|
| 69_c5-1 | 69 | TP53                      | MODIFIER; MODERATE | c.-5G>A;<br>c.356G>A;<br>c.473G>A;<br>c.77G>A             | ; p.Arg119His<br>;<br>; p.Arg158His<br>; p.Arg26His | 80    | FALSE | chr17:757<br>8457:C:T  | 241:chr17:<br>7578457:C<br>:T  | 0.001533 |
| 69_c5-1 | 69 | KRAS                      | MODERATE           | c.35G>T                                                   | p.Gly12Val                                          | 11213 | FALSE | chr12:253<br>98284:C:A | 241:chr12:<br>25398284:<br>C:A | 0.002622 |
| 69_c5-1 | 69 | C9orf53;<br>CDKN2A        | MODIFIER; MODERATE | n.*616A>C<br>;<br>c.*137T>G<br>;<br>c.214T>G;<br>c.257T>G | ; p.Cys72Gly;<br>; p.Leu86Arg                       | 1     | FALSE | chr9:2197<br>1144:A:C  | 241:chr9:2<br>1971144:A<br>:C  | 0.003891 |
| 69_c5-1 | 69 | EVI2A; NF1                | MODIFIER; MODERATE | c.-266C>T;<br>c.-338C>T;<br>c.4895G>A<br>;<br>c.4958G>A   | ; p.Arg1632Hi<br>s;<br>; p.Arg1653Hi<br>s           | 1     | FALSE | chr17:296<br>52960:G:A | 241:chr17:<br>29652960:<br>G:A | 0.001522 |
| 69_c5-1 | 69 | PTEN                      | MODERATE           | c.1004G>A                                                 | p.Arg335Gln                                         | 1     | FALSE | chr10:897<br>20853:G:A | 241:chr10:<br>89720853:<br>G:A | 0.001974 |
| 69_c5-1 | 69 | VHL                       | MODIFIER; MODERATE | c.341-<br>3256A>G;<br>c.358A>G                            | ; p.Arg120Gly                                       | 0     | FALSE | chr3:1018<br>8215:A:G  | 241:chr3:1<br>0188215:A<br>:G  | 0.005892 |
| 69_c5-1 | 69 | RET                       | MODERATE           | c.1690A>C                                                 | p.Thr564Pro                                         | 1     | FALSE | chr10:436<br>08342:A:C | 241:chr10:<br>43608342:<br>A:C | 0.007536 |
| 69_c5-1 | 69 | RET                       | MODERATE           | c.1888T>G                                                 | p.Cys630Gly                                         | 4     | FALSE | chr10:436<br>09936:T:G | 241:chr10:<br>43609936:<br>T:G | 0.002226 |
| 69_c5-1 | 69 | PIK3CA                    | MODERATE           | c.1636C>A                                                 | p.Gln546Lys                                         | 127   | FALSE | chr3:1789<br>36094:C:A | 241:chr3:1<br>78936094:<br>C:A | 0.001706 |
| 69_c5-1 | 69 | TP53                      | MODIFIER; MODERATE | c.-15A>C;<br>c.346A>C;<br>c.463A>C;<br>c.67A>C            | ; p.Thr116Pro<br>;<br>; p.Thr155Pro<br>; p.Thr23Pro | 17    | FALSE | chr17:757<br>8467:T:G  | 241:chr17:<br>7578467:T<br>:G  | 0.004666 |
| 69_c5-1 | 69 | CDKN2A;<br>CDKN2B-<br>AS1 | MODERATE; MODIFIER | c.22A>G;<br>n.-1T>C                                       | p.Thr8Ala;                                          | 1     | FALSE | chr9:2199<br>4309:T:C  | 241:chr9:2<br>1994309:T<br>:C  | 0.005427 |
| 69_c5-1 | 69 | VHL                       | MODIFIER; MODERATE | c.341-<br>3270A>C;<br>c.344A>C                            | ; p.His115Pro                                       | 0     | FALSE | chr3:1018<br>8201:A:C  | 241:chr3:1<br>0188201:A<br>:C  | 0.001838 |
| 69_c5-1 | 69 | PTEN                      | MODERATE           | c.370T>C                                                  | p.Cys124Arg                                         | 4     | FALSE | chr10:896<br>92886:T:C | 241:chr10:<br>89692886:<br>T:C | 0.001657 |

|          |     |                                 |                            |                                                 |                                                               |    |       |                        |                                |          |
|----------|-----|---------------------------------|----------------------------|-------------------------------------------------|---------------------------------------------------------------|----|-------|------------------------|--------------------------------|----------|
| 69_c5-1  | 69  | APC                             | MODERATE                   | c.721C>T;<br>c.775C>T                           | p.Arg241Trp<br>;<br>p.Arg259Trp                               | 0  | FALSE | chr5:1121<br>37021:C:T | 241:chr5:1<br>12137021:<br>C:T | 0.001618 |
| 69_c5-1  | 69  | CDKN2A                          | MODIFIER; MODERATE         | c.194-<br>3519C>T;<br>c.101C>T                  | ; p.Ala34Val                                                  | 2  | FALSE | chr9:2197<br>4726:G:A  | 241:chr9:2<br>1974726:G<br>:A  | 0.002101 |
| 69_c5-1  | 69  | MITF                            | MODERATE                   | c.157A>C;<br>c.265A>C;<br>c.310A>C;<br>c.313A>C | p.Thr53Pro;<br>p.Thr89Pro;<br>p.Thr104Pro<br>;<br>p.Thr105Pro | 0  | FALSE | chr3:6992<br>8493:A:C  | 241:chr3:6<br>9928493:A<br>:C  | 0.004065 |
| 69_c5-1  | 69  | NTRK1                           | MODERATE                   | c.1940T>G<br>;<br>c.2030T>G<br>;<br>c.2048T>G   | p.Val647Gly;<br>p.Val677Gly;<br>p.Val683Gly                   | 2  | FALSE | chr1:1568<br>49792:T:G | 241:chr1:1<br>56849792:<br>T:G | 0.019231 |
| 69_c5-1  | 69  | EGFR                            | MODERATE                   | c.655T>G                                        | p.Cys219Gly                                                   | 2  | FALSE | chr7:5522<br>0265:T:G  | 241:chr7:5<br>5220265:T<br>:G  | 0.001667 |
| 69_c5-1  | 69  | MIR4673;<br>NOTCH1              | MODIFIER; MODERATE         | n.*59A>C;<br>c.1195A>C                          | ; p.Thr399Pro                                                 | 0  | FALSE | chr9:1394<br>12649:T:G | 241:chr9:1<br>39412649:<br>T:G | 0.010368 |
| 69_c5-1  | 69  | KIT                             | MODERATE                   | c.2149T>C;<br>c.2161T>C                         | p.Tyr717His;<br>p.Tyr721His                                   | 1  | FALSE | chr4:5559<br>7513:T:C  | 241:chr4:5<br>5597513:T<br>:C  | 0.001645 |
| 130_c2-1 | 130 | IGF1R                           | MODERATE                   | c.3934T>C;<br>c.3937T>C                         | p.Ser1312Pr<br>o;<br>p.Ser1313Pr<br>o                         | 0  | FALSE | chr15:995<br>00504:T:C | 244:chr15:<br>99500504:<br>T:C | 0.04026  |
| 130_c2-1 | 130 | TP53                            | LOW; MODIFIER;<br>MODERATE | c.-51G>A;<br>c.310G>A;<br>c.31G>A;<br>c.427G>A  | ; p.Val104Me<br>t;<br>p.Val11Met;<br>p.Val143Me<br>t          | 24 | FALSE | chr17:757<br>8503:C:T  | 244:chr17:<br>7578503:C<br>:T  | 0.00224  |
| 130_c2-1 | 130 | FOXL2;<br>FOXL2NB;<br>LINC01391 | MODERATE; MODIFIER         | c.282T>A;<br>c.-132A>T;<br>n.-1T>A              | p.Asn94Lys;                                                   | 0  | FALSE | chr3:1386<br>65283:A:T | 244:chr3:1<br>38665283:<br>A:T | 0.006508 |
| 130_c2-1 | 130 | MIR4673;<br>NOTCH1              | MODIFIER; MODERATE         | n.*59A>C;<br>c.1195A>C                          | ; p.Thr399Pro                                                 | 0  | FALSE | chr9:1394<br>12649:T:G | 244:chr9:1<br>39412649:<br>T:G | 0.005587 |

|          |     |                             |                    |                                                                                                                  |                                                               |    |       |                    |                        |          |
|----------|-----|-----------------------------|--------------------|------------------------------------------------------------------------------------------------------------------|---------------------------------------------------------------|----|-------|--------------------|------------------------|----------|
| 130_c2-1 | 130 | ERBB2;<br>MIEN1;<br>MIR4728 | MODIFIER; MODERATE | c.3160-213A>G;<br>c.3251A>G<br>;<br>c.3296A>G<br>;<br>c.3341A>G<br>;<br>n.3665A>G<br>;<br>c.*388T>C;<br>n.*67A>G | p.Glu1084Gly;<br>p.Glu1099Gly;<br>p.Glu1114Gly                | 1  | FALSE | chr17:37883729:A:G | 244:chr17:37883729:A:G | 0.002424 |
| 130_c2-1 | 130 | MET                         | HIGH               | c.1619G>A                                                                                                        | p.Trp540*                                                     | 1  | FALSE | chr7:116380997:G:A | 244:chr7:116380997:G:A | 0.002247 |
| 130_c2-1 | 130 | NTRK1                       | MODERATE           | c.1940T>G<br>;<br>c.2030T>G<br>;<br>c.2048T>G                                                                    | p.Val647Gly;<br>p.Val677Gly;<br>p.Val683Gly                   | 2  | FALSE | chr1:156849792:T:G | 244:chr1:156849792:T:G | 0.046512 |
| 130_c2-1 | 130 | SMO                         | MODERATE           | c.1045A>C                                                                                                        | p.Thr349Pro                                                   | 0  | FALSE | chr7:128846115:A:C | 244:chr7:128846115:A:C | 0.028769 |
| 130_c2-1 | 130 | IDH2                        | MODERATE           | c.128A>C;<br>c.362A>C;<br>c.518A>C                                                                               | p.His43Pro;<br>p.His121Pro<br>;<br>p.His173Pro                | 1  | FALSE | chr15:90631835:T:G | 244:chr15:90631835:T:G | 0.006046 |
| 130_c2-1 | 130 | FLT3                        | HIGH               | c.1096G>T                                                                                                        | p.Glu366*                                                     | 0  | FALSE | chr13:28622521:C:A | 244:chr13:28622521:C:A | 0.002342 |
| 130_c2-1 | 130 | EGFR                        | MODERATE           | c.627A>C                                                                                                         | p.Lys209Asn                                                   | 1  | FALSE | chr7:55219054:A:C  | 244:chr7:55219054:A:C  | 0.003175 |
| 130_c2-1 | 130 | TP53                        | MODIFIER; HIGH     | c.-48C>T;<br>c.313C>T;<br>c.34C>T;<br>c.430C>T                                                                   | p.Gln105*;<br>p.Gln12*;<br>p.Gln144*                          | 42 | FALSE | chr17:7578500:G:A  | 244:chr17:7578500:G:A  | 0.00224  |
| 130_c2-1 | 130 | NOTCH1                      | MODERATE           | c.6088T>C                                                                                                        | p.Ser2030Pro                                                  | 0  | FALSE | chr9:139393443:A:G | 244:chr9:139393443:A:G | 0.005442 |
| 74_c8-1  | 74  | TP53                        | MODERATE           | c.688A>C;<br>c.292A>C;<br>c.211A>C;<br>c.571A>C                                                                  | p.Thr230Pro<br>;<br>p.Thr98Pro;<br>p.Thr71Pro;<br>p.Thr191Pro | 10 | FALSE | chr17:757593:T:G   | 246:chr17:757593:T:G   | 0.008403 |
| 74_c8-1  | 74  | VHL                         | MODIFIER; MODERATE | c.341-3270A>C;<br>c.344A>C                                                                                       | p.His115Pro                                                   | 0  | FALSE | chr3:10188201:A:C  | 246:chr3:10188201:A:C  | 0.004695 |
| 74_c8-1  | 74  | HGF                         | HIGH               | c.517C>T;<br>c.532C>T                                                                                            | p.Arg173*;<br>p.Arg178*                                       | 0  | FALSE | chr7:81381529:G:A  | 246:chr7:81381529:G:A  | 0.004329 |

|         |    |                   |                    |                                                 |                                                                         |       |       |                        |                                |          |
|---------|----|-------------------|--------------------|-------------------------------------------------|-------------------------------------------------------------------------|-------|-------|------------------------|--------------------------------|----------|
| 74_c8-1 | 74 | SMO               | MODERATE           | c.1045A>C                                       | p.Thr349Pro                                                             | 0     | FALSE | chr7:1288<br>46115:A:C | 246:chr7:1<br>28846115:<br>A:C | 0.023576 |
| 74_c8-1 | 74 | NTRK1             | MODERATE           | c.1940T>G<br>;<br>c.2030T>G<br>;<br>c.2048T>G   | p.Val647Gly;<br>p.Val677Gly;<br>p.Val683Gly                             | 2     | FALSE | chr1:1568<br>49792:T:G | 246:chr1:1<br>56849792:<br>T:G | 0.034591 |
| 9_bl-4  | 9  | EGFR              | MODERATE           | c.1159C>G                                       | p.Leu387Val                                                             | 1     | FALSE | chr7:5522<br>4477:C:G  | 247:chr7:5<br>5224477:C<br>:G  | 0.004211 |
| 9_bl-4  | 9  | KRAS              | MODERATE           | c.35G>A                                         | p.Gly12Asp                                                              | 11213 | FALSE | chr12:253<br>98284:C:T | 247:chr12:<br>25398284:<br>C:T | 0.041958 |
| 23_bl-3 | 23 | NF1               | HIGH               | c.6652C>T;<br>c.6715C>T                         | p.Gln2218*;<br>p.Gln2239*                                               | 2     | FALSE | chr17:296<br>65053:C:T | 248:chr17:<br>29665053:<br>C:T | 0.013841 |
| 23_bl-3 | 23 | TP53              | MODERATE           | c.845G>C;<br>c.449G>C;<br>c.368G>C;<br>c.728G>C | p.Arg282Pro<br>;<br>p.Arg150Pro<br>;<br>p.Arg123Pro<br>;<br>p.Arg243Pro | 26    | FALSE | chr17:757<br>7093:C:G  | 248:chr17:<br>7577093:C<br>:G  | 0.005013 |
| 23_bl-3 | 23 | EGFR              | MODERATE           | c.445C>T                                        | p.Arg149Trp                                                             | 1     | FALSE | chr7:5521<br>4319:C:T  | 248:chr7:5<br>5214319:C<br>:T  | 0.004425 |
| 23_bl-3 | 23 | CWH43             | MODERATE           | c.1990C>T;<br>c.2071C>T                         | p.His664Tyr;<br>p.His691Tyr                                             | 0     | FALSE | chr4:4906<br>3878:C:T  | 248:chr4:4<br>9063878:C<br>:T  | 0.00813  |
| 23_bl-3 | 23 | TP53              | MODERATE           | c.139C>T;<br>c.418C>T;<br>c.535C>T;<br>c.58C>T  | p.His47Tyr;<br>p.His140Tyr;<br>p.His179Tyr;<br>p.His20Tyr               | 92    | FALSE | chr17:757<br>8395:G:A  | 248:chr17:<br>7578395:G<br>:A  | 0.016204 |
| 23_bl-3 | 23 | BRAF              | MODERATE           | c.1790T>A                                       | p.Leu597Gln                                                             | 18    | FALSE | chr7:1404<br>53145:A:T | 248:chr7:1<br>40453145:<br>A:T | 0.010695 |
| 23_bl-3 | 23 | EPHA3             | MODERATE           | c.2416G>A                                       | p.Asp806As<br>n                                                         | 0     | FALSE | chr3:8949<br>8444:G:A  | 248:chr3:8<br>9498444:G<br>:A  | 0.004444 |
| 23_bl-3 | 23 | TP53              | MODERATE           | c.361A>G;<br>c.442A>G;<br>c.721A>G;<br>c.838A>G | p.Arg121Gly<br>;<br>p.Arg148Gly<br>;<br>p.Arg241Gly<br>;<br>p.Arg280Gly | 24    | FALSE | chr17:757<br>7100:T:C  | 248:chr17:<br>7577100:T<br>:C  | 0.005076 |
| 26_c2-1 | 26 | EGFR;<br>EGFR-AS1 | MODERATE; MODIFIER | c.2419G>A<br>;<br>n.1143C>T                     | p.Asp807As<br>n;                                                        | 1     | FALSE | chr7:5524<br>9121:G:A  | 249:chr7:5<br>5249121:G<br>:A  | 0.000841 |

|         |    |                   |                    |                                                                                 |                                                                                                                 |    |       |                        |                                |          |
|---------|----|-------------------|--------------------|---------------------------------------------------------------------------------|-----------------------------------------------------------------------------------------------------------------|----|-------|------------------------|--------------------------------|----------|
| 26_c2-1 | 26 | AKT3              | MODERATE           | c.469G>T                                                                        | p.Gly157Cys                                                                                                     | 0  | FALSE | chr1:2438<br>01005:C:A | 249:chr1:2<br>43801005:<br>C:A | 0.001096 |
| 26_c2-1 | 26 | CTNNB1            | MODERATE           | c.166G>A                                                                        | p.Asp56Asn                                                                                                      | 0  | FALSE | chr3:4126<br>6169:G:A  | 249:chr3:4<br>1266169:G<br>:A  | 0.000872 |
| 26_c2-1 | 26 | FGFR1             | MODERATE           | c.1135C>T;<br>c.1141C>T;<br>c.1378C>T;<br>c.1402C>T;<br>c.1408C>T;<br>c.1501C>T | p.Arg379Cys<br>;<br>p.Arg381Cys<br>;<br>p.Arg460Cys<br>;<br>p.Arg468Cys<br>;<br>p.Arg470Cys<br>;<br>p.Arg501Cys | 1  | FALSE | chr8:3827<br>5768:G:A  | 249:chr8:3<br>8275768:G<br>:A  | 0.000867 |
| 26_c2-1 | 26 | NF1               | MODERATE           | c.2695T>G                                                                       | p.Leu899Val                                                                                                     | 3  | FALSE | chr17:295<br>56328:T:G | 249:chr17:<br>29556328:<br>T:G | 0.010118 |
| 26_c2-1 | 26 | HGF               | MODERATE           | c.404G>T                                                                        | p.Ser135Ile                                                                                                     | 0  | FALSE | chr7:8138<br>6583:C:A  | 249:chr7:8<br>1386583:C<br>:A  | 0.00137  |
| 26_c2-1 | 26 | BRAF              | MODERATE           | c.1385G>T                                                                       | p.Arg462Ile                                                                                                     | 2  | FALSE | chr7:1404<br>81423:C:A | 249:chr7:1<br>40481423:<br>C:A | 0.000903 |
| 26_c2-1 | 26 | EGFR;<br>EGFR-AS1 | MODERATE; MODIFIER | c.2591C>A<br>; n.-1G>T                                                          | p.Ala864Glu<br>;                                                                                                | 2  | FALSE | chr7:5525<br>9533:C:A  | 249:chr7:5<br>5259533:C<br>:A  | 0.00113  |
| 26_c2-1 | 26 | EGFR;<br>EGFR-AS1 | MODERATE; MODIFIER | c.2546A>G<br>; n.-1T>C                                                          | p.Gln849Arg<br>;                                                                                                | 2  | FALSE | chr7:5525<br>9488:A:G  | 249:chr7:5<br>5259488:A<br>:G  | 0.001172 |
| 26_c2-1 | 26 | PTEN              | MODERATE           | c.443C>A                                                                        | p.Ala148Glu                                                                                                     | 1  | FALSE | chr10:896<br>92959:C:A | 249:chr10:<br>89692959:<br>C:A | 0.001738 |
| 26_c2-1 | 26 | MAP2K1            | MODERATE           | c.379G>A                                                                        | p.Val127Met                                                                                                     | 1  | FALSE | chr15:667<br>29171:G:A | 249:chr15:<br>66729171:<br>G:A | 0.001152 |
| 26_c2-1 | 26 | TP53              | MODIFIER; MODERATE | c.-5G>T;<br>c.356G>T;<br>c.473G>T;<br>c.77G>T                                   | p.Arg119Leu<br>;<br>p.Arg158Leu<br>;<br>p.Arg26Leu                                                              | 80 | FALSE | chr17:757<br>8457:C:A  | 249:chr17:<br>7578457:C<br>:A  | 0.001284 |
| 26_c2-1 | 26 | MAP2K1            | MODERATE           | c.371C>A                                                                        | p.Pro124Gln                                                                                                     | 1  | FALSE | chr15:667<br>29163:C:A | 249:chr15:<br>66729163:<br>C:A | 0.000785 |
| 26_c2-1 | 26 | EPHA3             | MODERATE           | c.1516G>A                                                                       | p.Val506Ile                                                                                                     | 0  | FALSE | chr3:8944<br>8552:G:A  | 249:chr3:8<br>9448552:G<br>:A  | 0.001034 |
| 26_c2-1 | 26 | NF1               | HIGH               | c.3721C>T                                                                       | p.Arg1241*                                                                                                      | 5  | FALSE | chr17:295<br>62641:C:T | 249:chr17:<br>29562641:<br>C:T | 0.000958 |
| 26_c2-1 | 26 | EGFR              | MODIFIER; MODERATE | c.*1464C><br>T;<br>c.1279C>T                                                    | p.Arg427Cys                                                                                                     | 2  | FALSE | chr7:5522<br>5427:C:T  | 249:chr7:5<br>5225427:C<br>:T  | 0.000888 |

|         |    |                |                    |                                                                                                                        |                                                                         |     |       |                        |                                |          |
|---------|----|----------------|--------------------|------------------------------------------------------------------------------------------------------------------------|-------------------------------------------------------------------------|-----|-------|------------------------|--------------------------------|----------|
| 26_c2-1 | 26 | KIT            | MODERATE           | c.1611G>A;<br>c.1623G>A                                                                                                | p.Met537Ile;<br>p.Met541Ile                                             | 1   | FALSE | chr4:5559<br>3466:G:A  | 249:chr4:5<br>5593466:G<br>:A  | 0.000955 |
| 26_c2-1 | 26 | TP53           | MODERATE           | c.242G>T;<br>c.323G>T;<br>c.602G>T;<br>c.719G>T                                                                        | p.Ser81Ile;<br>p.Ser108Ile;<br>p.Ser201Ile;<br>p.Ser240Ile              | 6   | FALSE | chr17:757<br>7562:C:A  | 249:chr17:<br>7577562:C<br>:A  | 0.001023 |
| 26_c2-1 | 26 | PTEN           | MODERATE           | c.274G>A                                                                                                               | p.Asp92Asn                                                              | 3   | FALSE | chr10:896<br>92790:G:A | 249:chr10:<br>89692790:<br>G:A | 0.001076 |
| 26_c2-1 | 26 | PIK3CA         | MODERATE           | c.3001C>A                                                                                                              | p.Leu1001Ile                                                            | 3   | FALSE | chr3:1789<br>51946:C:A | 249:chr3:1<br>78951946:<br>C:A | 0.000815 |
| 26_c2-1 | 26 | CSDE1;<br>NRAS | MODIFIER; MODERATE | c.*2430G><br>T;<br>c.*2523G><br>T;<br>c.*2817G><br>T;<br>c.*2910G><br>T;<br>c.*2964G><br>T;<br>c.*3057G><br>T; c.34G>T | ; p.Gly12Cys                                                            | 154 | FALSE | chr1:1152<br>58748:C:A | 249:chr1:1<br>15258748:<br>C:A | 0.000963 |
| 26_c2-1 | 26 | CTNNB1         | MODERATE           | c.1358G>A                                                                                                              | p.Arg453Gln                                                             | 0   | FALSE | chr3:4127<br>5192:G:A  | 249:chr3:4<br>1275192:G<br>:A  | 0.000727 |
| 26_c2-1 | 26 | TP53           | MODERATE           | c.128G>A;<br>c.407G>A;<br>c.47G>A;<br>c.524G>A                                                                         | p.Arg43His;<br>p.Arg136His<br>;<br>p.Arg16His;<br>p.Arg175His           | 979 | FALSE | chr17:757<br>8406:C:T  | 249:chr17:<br>7578406:C<br>:T  | 0.001123 |
| 26_c2-1 | 26 | TP53           | MODIFIER; MODERATE | c.*182C>T;<br>c.*94C>T;<br>c.1075C>T;<br>c.598C>T;<br>c.679C>T;<br>c.958C>T                                            | p.Pro359Ser<br>;<br>p.Pro200Ser<br>;<br>p.Pro227Ser<br>;<br>p.Pro320Ser | 1   | FALSE | chr17:757<br>3952:G:A  | 249:chr17:<br>7573952:G<br>:A  | 0.000836 |
| 26_c2-1 | 26 | NRAS           | MODERATE           | c.553C>T                                                                                                               | p.Pro185Ser                                                             | 2   | FALSE | chr1:1152<br>51173:G:A | 249:chr1:1<br>15251173:<br>G:A | 0.000971 |
| 26_c2-1 | 26 | NF1            | MODERATE           | c.7381G>A;<br>c.7444G>A                                                                                                | p.Asp2461Asn;<br>p.Asp2482Asn                                           | 1   | FALSE | chr17:296<br>77323:G:A | 249:chr17:<br>29677323:<br>G:A | 0.00115  |



|         |    |                    |                    |                                                      |                                                                             |     |       |                        |                                |          |
|---------|----|--------------------|--------------------|------------------------------------------------------|-----------------------------------------------------------------------------|-----|-------|------------------------|--------------------------------|----------|
| 26_c2-1 | 26 | TP53               | MODERATE           | c.371G>T;<br>c.452G>T;<br>c.731G>T;<br>c.848G>T      | p.Arg124Leu<br>;<br>p.Arg151Leu<br>;<br>p.Arg244Leu<br>;<br>p.Arg283Leu     | 24  | FALSE | chr17:757<br>7090:C:A  | 249:chr17:<br>7577090:C<br>:A  | 0.000972 |
| 26_c2-1 | 26 | RET                | MODERATE           | c.1538C>T                                            | p.Ala513Val                                                                 | 1   | FALSE | chr10:436<br>07562:C:T | 249:chr10:<br>43607562:<br>C:T | 0.000887 |
| 26_c2-1 | 26 | TP53               | MODERATE           | c.405G>T;<br>c.486G>T;<br>c.765G>T;<br>c.882G>T      | p.Glu135As<br>p;<br>p.Glu162As<br>p;<br>p.Glu255As<br>p;<br>p.Glu294As<br>p | 4   | FALSE | chr17:757<br>7056:C:A  | 249:chr17:<br>7577056:C<br>:A  | 0.00092  |
| 26_c2-1 | 26 | EGFR               | MODERATE           | c.866C>T                                             | p.Ala289Val                                                                 | 34  | FALSE | chr7:5522<br>1822:C:T  | 249:chr7:5<br>5221822:C<br>:T  | 0.001135 |
| 26_c2-1 | 26 | TP53               | MODERATE; MODIFIER | c.218G>A;<br>c.335G>A;<br>c.-279G>A;<br>c.-360G>A    | p.Gly73Asp;<br>p.Gly112Asp<br>;                                             | 1   | FALSE | chr17:757<br>9352:C:T  | 249:chr17:<br>7579352:C<br>:T  | 0.001101 |
| 26_c2-1 | 26 | TP53               | MODIFIER; MODERATE | c.-9G>T;<br>c.352G>T;<br>c.469G>T;<br>c.73G>T        | p.Val118Phe<br>;<br>p.Val157Phe<br>;<br>p.Val25Phe                          | 169 | FALSE | chr17:757<br>8461:C:A  | 249:chr17:<br>7578461:C<br>:A  | 0.001276 |
| 26_c2-1 | 26 | CTNNB1             | MODERATE           | c.125C>A                                             | p.Thr42Lys                                                                  | 0   | FALSE | chr3:4126<br>6128:C:A  | 249:chr3:4<br>1266128:C<br>:A  | 0.001412 |
| 26_c2-1 | 26 | PIK3CA             | MODERATE           | c.1070G>A                                            | p.Arg357Gln                                                                 | 2   | FALSE | chr3:1789<br>22301:G:A | 249:chr3:1<br>78922301:<br>G:A | 0.000936 |
| 26_c2-1 | 26 | TP53               | MODERATE           | c.127C>T;<br>c.406C>T;<br>c.46C>T;<br>c.523C>T       | p.Arg43Cys;<br>p.Arg136Cys<br>;<br>p.Arg16Cys;<br>p.Arg175Cys               | 20  | FALSE | chr17:757<br>8407:G:A  | 249:chr17:<br>7578407:G<br>:A  | 0.001129 |
| 26_c2-1 | 26 | PTEN               | MODERATE           | c.421C>A                                             | p.His141Asn                                                                 | 2   | FALSE | chr10:896<br>92937:C:A | 249:chr10:<br>89692937:<br>C:A | 0.001507 |
| 26_c2-1 | 26 | HOXD-AS2;<br>HOXD8 | MODIFIER; MODERATE | n.*692C>T<br>;<br>c.304G>A;<br>c.853G>A;<br>c.856G>A | p.Glu102Lys<br>;<br>p.Glu285Lys<br>;<br>p.Glu286Lys                         | 0   | FALSE | chr2:1769<br>96323:G:A | 249:chr2:1<br>76996323:<br>G:A | 0.000834 |

|         |    |                    |                    |                                                                             |                                                             |      |       |                     |                         |          |
|---------|----|--------------------|--------------------|-----------------------------------------------------------------------------|-------------------------------------------------------------|------|-------|---------------------|-------------------------|----------|
| 26_c2-1 | 26 | AKT1               | MODERATE           | c.286C>T                                                                    | p.Arg96Trp                                                  | 1    | FALSE | chr14:105242997:G:A | 249:chr14:105242997:G:A | 0.001234 |
| 26_c2-1 | 26 | PIK3CA             | MODERATE           | c.1633G>A                                                                   | p.Glu545Lys                                                 | 1189 | FALSE | chr3:178936091:G:A  | 249:chr3:178936091:G:A  | 0.000871 |
| 26_c2-1 | 26 | ALK                | MODERATE           | c.2677G>A                                                                   | p.Gly893Arg                                                 | 1    | FALSE | chr2:29451888:C:T   | 249:chr2:29451888:C:T   | 0.001438 |
| 26_c2-1 | 26 | RET                | MODERATE           | c.1690A>C                                                                   | p.Thr564Pro                                                 | 1    | FALSE | chr10:43608342:A:C  | 249:chr10:43608342:A:C  | 0.008285 |
| 26_c2-1 | 26 | TP53               | MODERATE; HIGH     | c.363G>T;<br>c.480G>T;<br>c.84G>T;<br>c.3G>T                                | p.Met121Ile;<br>p.Met160Ile;<br>p.Met28Ile;<br>p.Met1?      | 4    | FALSE | chr17:7578450:C:A   | 249:chr17:7578450:C:A   | 0.001247 |
| 26_c2-1 | 26 | TP53               | MODERATE           | c.499G>A;<br>c.580G>A;<br>c.859G>A;<br>c.976G>A                             | p.Glu167Lys;<br>p.Glu194Lys;<br>p.Glu287Lys;<br>p.Glu326Lys | 4    | FALSE | chr17:7576870:C:T   | 249:chr17:7576870:C:T   | 0.00115  |
| 26_c2-1 | 26 | HOXD-AS2;<br>HOXD8 | MODIFIER; MODERATE | n.*692G>T;<br>c.105C>A;<br>c.654C>A;<br>c.657C>A                            | p.Asn35Lys;<br>p.Asn218Lys;<br>p.Asn219Lys                  | 0    | FALSE | chr2:176996124:C:A  | 249:chr2:176996124:C:A  | 0.001532 |
| 26_c2-1 | 26 | PTEN               | HIGH               | c.720C>A                                                                    | p.Tyr240*                                                   | 3    | FALSE | chr10:89717695:C:A  | 249:chr10:89717695:C:A  | 0.001468 |
| 26_c2-1 | 26 | FGFR1              | MODIFIER; MODERATE | c.-85G>T;<br>c.107G>T;<br>c.8G>T                                            | p.Ser36Ile;<br>p.Ser3Ile                                    | 1    | FALSE | chr8:38314957:C:A   | 249:chr8:38314957:C:A   | 0.002478 |
| 26_c2-1 | 26 | TP53               | MODIFIER; HIGH     | c.*143G>T;<br>c.*55G>T;<br>c.1036G>T;<br>c.559G>T;<br>c.640G>T;<br>c.919G>T | p.Glu346*;<br>p.Glu187*;<br>p.Glu214*;<br>p.Glu307*         | 4    | FALSE | chr17:7573991:C:A   | 249:chr17:7573991:C:A   | 0.001208 |
| 26_c2-1 | 26 | CTNNB1             | MODERATE           | c.110C>A                                                                    | p.Ser37Tyr                                                  | 0    | FALSE | chr3:41266113:C:A   | 249:chr3:41266113:C:A   | 0.001931 |
| 26_c2-1 | 26 | HGF                | HIGH               | c.1873C>T;<br>c.1888C>T                                                     | p.Arg625*;<br>p.Arg630*                                     | 0    | FALSE | chr7:81334828:G:A   | 249:chr7:81334828:G:A   | 0.000972 |

|         |    |                             |                    |                                                                                              |                                                            |    |       |                    |                        |          |
|---------|----|-----------------------------|--------------------|----------------------------------------------------------------------------------------------|------------------------------------------------------------|----|-------|--------------------|------------------------|----------|
| 26_c2-1 | 26 | NF1                         | MODERATE           | c.590C>A                                                                                     | p.Thr197Lys                                                | 1  | FALSE | chr17:29508443:C:A | 249:chr17:29508443:C:A | 0.001685 |
| 26_c2-1 | 26 | ERBB2;<br>MIEN1;<br>MIR4728 | MODIFIER; MODERATE | c.*174C>A;<br>c.3505C>A;<br>c.3550C>A;<br>c.3595C>A;<br>n.3919C>A;<br>c.*388G>T;<br>n.*67C>A | p.Pro1169T<br>hr;<br>p.Pro1184T<br>hr;<br>p.Pro1199T<br>hr | 2  | FALSE | chr17:37884124:C:A | 249:chr17:37884124:C:A | 0.001121 |
| 26_c2-1 | 26 | RET                         | MODERATE           | c.2116G>A                                                                                    | p.Val706Met                                                | 2  | FALSE | chr10:43610164:G:A | 249:chr10:43610164:G:A | 0.000739 |
| 26_c2-1 | 26 | PIK3CA                      | MODERATE           | c.1645G>A                                                                                    | p.Asp549Asn                                                | 4  | FALSE | chr3:178936103:G:A | 249:chr3:178936103:G:A | 0.000935 |
| 26_c2-1 | 26 | MAP2K1                      | MODERATE           | c.140G>A                                                                                     | p.Arg47Gln                                                 | 4  | FALSE | chr15:66727424:G:A | 249:chr15:66727424:G:A | 0.00076  |
| 26_c2-1 | 26 | EGFR                        | MODIFIER; MODERATE | c.*1464G>T;<br>c.1507G>T                                                                     | p.Gly503Cys                                                | 1  | FALSE | chr7:55229200:G:T  | 249:chr7:55229200:G:T  | 0.001202 |
| 26_c2-1 | 26 | EGFR                        | MODIFIER; MODERATE | c.*1464C>A;<br>c.1476C>A                                                                     | p.Ser492Arg                                                | 4  | FALSE | chr7:55228009:C:A  | 249:chr7:55228009:C:A  | 0.000966 |
| 26_c2-1 | 26 | TP53                        | MODERATE           | c.234G>T;<br>c.315G>T;<br>c.594G>T;<br>c.711G>T                                              | p.Met78Ile;<br>p.Met105Ile;<br>p.Met198Ile;<br>p.Met237Ile | 81 | FALSE | chr17:7577570:C:A  | 249:chr17:7577570:C:A  | 0.000997 |
| 26_c2-1 | 26 | TP53                        | HIGH               | c.772G>T;<br>c.376G>T;<br>c.295G>T;<br>c.655G>T                                              | p.Glu258*;<br>p.Glu126*;<br>p.Glu99*;<br>p.Glu219*         | 46 | FALSE | chr17:7577509:C:A  | 249:chr17:7577509:C:A  | 0.001088 |
| 26_c2-1 | 26 | HGF                         | MODERATE           | c.5G>T                                                                                       | p.Trp2Leu                                                  | 0  | FALSE | chr7:81399283:C:A  | 249:chr7:81399283:C:A  | 0.001369 |
| 26_c2-1 | 26 | RET                         | MODERATE           | c.1339G>A                                                                                    | p.Ala447Thr                                                | 1  | FALSE | chr10:43606730:G:A | 249:chr10:43606730:G:A | 0.000777 |
| 26_c2-1 | 26 | KIT                         | MODERATE           | c.235C>A                                                                                     | p.Gln79Lys                                                 | 2  | FALSE | chr4:55561845:C:A  | 249:chr4:55561845:C:A  | 0.001098 |

|         |    |                  |                            |                                                 |                                                                         |     |       |                        |                                |          |
|---------|----|------------------|----------------------------|-------------------------------------------------|-------------------------------------------------------------------------|-----|-------|------------------------|--------------------------------|----------|
| 26_c2-1 | 26 | KIT              | HIGH                       | c.1698C>A;<br>; c.1710C>A                       | p.Tyr566*;<br>p.Tyr570*                                                 | 2   | FALSE | chr4:5559<br>3644:C:A  | 249:chr4:5<br>5593644:C<br>:A  | 0.000969 |
| 26_c2-1 | 26 | CACNB1;<br>RPL19 | MODIFIER; MODERATE         | c.-209C>T;<br>c.91G>A                           | ; p.Glu31Lys                                                            | 0   | FALSE | chr17:373<br>57551:G:A | 249:chr17:<br>37357551:<br>G:A | 0.001868 |
| 26_c2-1 | 26 | PIK3CA           | MODERATE                   | c.478C>A                                        | p.His160Asn                                                             | 1   | FALSE | chr3:1789<br>17603:C:A | 249:chr3:1<br>78917603:<br>C:A | 0.000934 |
| 26_c2-1 | 26 | NF1              | MODERATE                   | c.4526C>A<br>;<br>c.4589C>A                     | p.Ala1509As<br>p;<br>p.Ala1530As<br>p                                   | 1   | FALSE | chr17:295<br>88740:C:A | 249:chr17:<br>29588740:<br>C:A | 0.001161 |
| 26_c2-1 | 26 | RET              | MODERATE                   | c.1891G>A                                       | p.Asp631As<br>n                                                         | 1   | FALSE | chr10:436<br>09939:G:A | 249:chr10:<br>43609939:<br>G:A | 0.000737 |
| 44_bl-2 | 44 | TP53             | LOW; MODIFIER;<br>MODERATE | c.-6C>T;<br>c.355C>T;<br>c.472C>T;<br>c.76C>T   | ; p.Arg119Cys<br>;<br>p.Arg158Cys<br>; p.Arg26Cys                       | 17  | FALSE | chr17:757<br>8458:G:A  | 251:chr17:<br>7578458:G<br>:A  | 0.00166  |
| 44_bl-2 | 44 | TP53             | MODERATE                   | c.341G>A;<br>c.422G>A;<br>c.701G>A;<br>c.818G>A | p.Arg114His<br>;<br>p.Arg141His<br>;<br>p.Arg234His<br>;<br>p.Arg273His | 647 | TRUE  | chr17:757<br>7120:C:T  | 251:chr17:<br>7577120:C<br>:T  | 0.00788  |
| 44_bl-2 | 44 | NF1              | HIGH                       | c.3721C>T                                       | p.Arg1241*                                                              | 5   | FALSE | chr17:295<br>62641:C:T | 251:chr17:<br>29562641:<br>C:T | 0.001538 |
| 44_bl-2 | 44 | TP53             | MODIFIER; MODERATE         | c.-44T>C;<br>c.317T>C;<br>c.38T>C;<br>c.434T>C  | ; p.Leu106Pro<br>;<br>p.Leu13Pro;<br>p.Leu145Pro                        | 19  | FALSE | chr17:757<br>8496:A:G  | 251:chr17:<br>7578496:A<br>:G  | 0.00159  |
| 44_bl-2 | 44 | TP53             | MODIFIER; MODERATE         | c.-3G>T;<br>c.358G>T;<br>c.475G>T;<br>c.79G>T   | ; p.Ala120Ser;<br>p.Ala159Ser;<br>p.Ala27Ser                            | 23  | FALSE | chr17:757<br>8455:C:A  | 251:chr17:<br>7578455:C<br>:A  | 0.003236 |
| 44_bl-2 | 44 | ALK              | MODERATE                   | c.2009C>T                                       | p.Ser670Leu                                                             | 1   | FALSE | chr2:2949<br>7997:G:A  | 251:chr2:2<br>9497997:G<br>:A  | 0.001617 |
| 44_bl-2 | 44 | CTNNB1           | MODERATE                   | c.125C>A                                        | p.Thr42Lys                                                              | 0   | FALSE | chr3:4126<br>6128:C:A  | 251:chr3:4<br>1266128:C<br>:A  | 0.001293 |
| 44_bl-2 | 44 | NF1              | MODERATE                   | c.2695T>G                                       | p.Leu899Val                                                             | 3   | FALSE | chr17:295<br>56328:T:G | 251:chr17:<br>29556328:<br>T:G | 0.007148 |
| 44_bl-2 | 44 | MET              | MODERATE                   | c.1076G>A                                       | p.Arg359Gln                                                             | 1   | FALSE | chr7:1163<br>40214:G:A | 251:chr7:1<br>16340214:<br>G:A | 0.00125  |

|         |    |     |                |                              |             |   |       |                        |                                |          |
|---------|----|-----|----------------|------------------------------|-------------|---|-------|------------------------|--------------------------------|----------|
| 44_bl-2 | 44 | NF1 | MODIFIER; HIGH | c.*2165G><br>A;<br>c.2088G>A | ; p.Trp696* | 1 | FALSE | chr17:295<br>53539:G:A | 251:chr17:<br>29553539:<br>G:A | 0.002214 |
|---------|----|-----|----------------|------------------------------|-------------|---|-------|------------------------|--------------------------------|----------|
